# Supplementary material for: Genome-wide DNA promoter methylation and transcriptome analysis in human adipose tissue unravels novel candidate genes for obesity
Source: PubMed Central journal article supplement — Mol Metab. 2016 Nov 16;6(1):86–100. doi: 10.1016/j.molmet.2016.11.003 (PMC5220399; doi:10.1016/j.molmet.2016.11.003), 2016-11-16
Supplement: mmc1.pdf [file mmc1.pdf]

Supplementary Figure 1

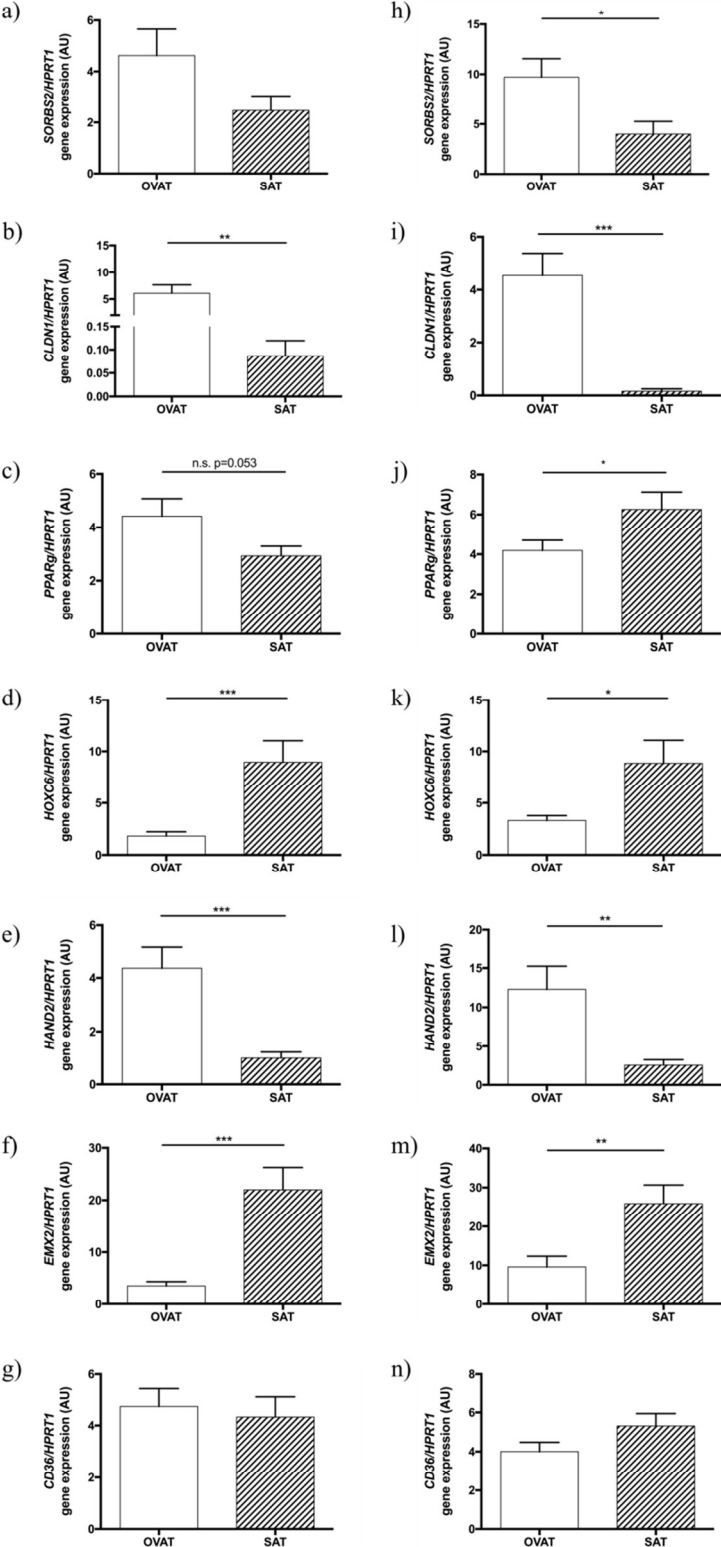

Supplementary Figure 1: Shows the mRNA expression of *SORBS2*; *CLDN1*; *PPARG*; *HOXC6*; *HAND2*; *EMX2* and *CD36* relative to the reference gene *HPRT1*. Bars represent mean±SEM in adipocytes (a-g) and the stroma vascular fraction (g-n). *P*-values are indicated as \* $<0.05$ ; \*\* $<0.01$  and \*\*\* $<0.001$ .

Supplementary Figure 2

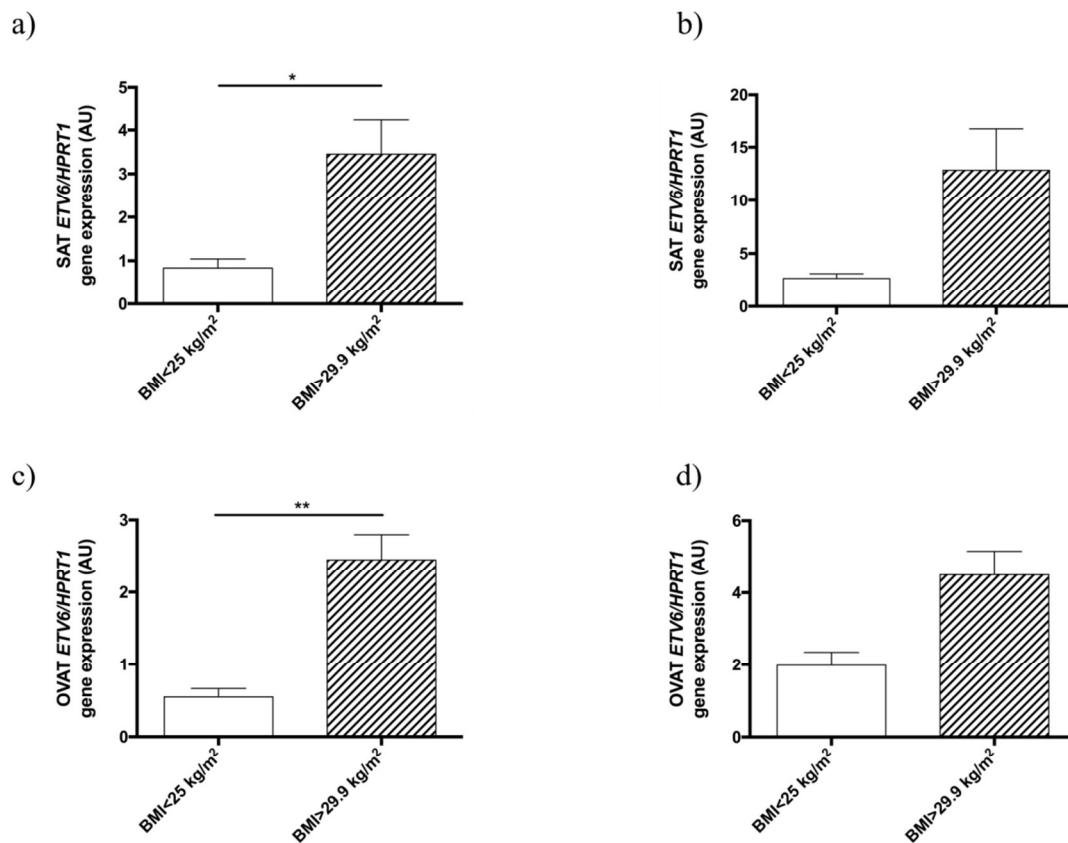

Supplementary Figure 2: Shows the mRNA expression of *ETV6/HPRT1* in a) adipocytes from SAT; b) stroma vascular fraction (SVF) from SAT; c) adipocytes from OVAT and d) SVF from OVAT. Bars represent mean±SEM and significant *P*-values were indicated as \* $<0.05$  and \*\* $<0.01$ .

Supplementary Table 1

**Methylation in non-obese SAT vs. OVAT**

| Transcript   | GeneName        | non-obese_in_sc   | non-obese_in_vis | p_value_in_sc | p_value_in_vis | fdr_in_sc | Fdr_in_sc | fdr_in_vis | Fdr_in_vis |
|--------------|-----------------|-------------------|------------------|---------------|----------------|-----------|-----------|------------|------------|
| NM_001584    | <i>MPPED2</i>   | 1                 | 0                | 2.00E-04      | 1              | 0.0012    | 0         | NA         | NA         |
| NM_001110213 | <i>PRH2</i>     | 0.913675601999091 | 0                | 2.00E-04      | 1              | 0.0012    | 0         | NA         | NA         |
| NM_005042    | <i>PRH2</i>     | 0.913675601999091 | 0                | 2.00E-04      | 1              | 0.0012    | 0         | NA         | NA         |
| NM_001004694 | <i>OR2T29</i>   | 0.872330758746025 | 0                | 2.00E-04      | 1              | 0.0012    | 0         | NA         | NA         |
| NR_029609    | <i>MIR10B</i>   | 0.864152657882781 | 0                | 2.00E-04      | 1              | 0.0012    | 0         | NA         | NA         |
| NM_006898    | <i>HOXD3</i>    | 0.852339845524761 | 0                | 2.00E-04      | 1              | 0.0012    | 0         | NA         | NA         |
| NM_198392    | <i>TCF21</i>    | 0.81462971376647  | 0                | 2.00E-04      | 1              | 0.0012    | 0         | NA         | NA         |
| NM_003206    | <i>TCF21</i>    | 0.814175374829623 | 0                | 2.00E-04      | 1              | 0.0012    | 0         | NA         | NA         |
| NM_001166393 | <i>MTUS1</i>    | 0.813266696955929 | 0                | 2.00E-04      | 1              | 0.0012    | 0         | NA         | NA         |
| NM_014621    | <i>HOXD4</i>    | 0.812812358019082 | 0                | 2.00E-04      | 1              | 0.0012    | 0         | NA         | NA         |
| NM_001135091 | <i>MUC15</i>    | 0.787369377555657 | 0                | 2.00E-04      | 1              | 0.0012    | 0         | NA         | NA         |
| NM_001135092 | <i>MUC15</i>    | 0.787369377555657 | 0                | 2.00E-04      | 1              | 0.0012    | 0         | NA         | NA         |
| NM_145650    | <i>MUC15</i>    | 0.787369377555657 | 0                | 2.00E-04      | 1              | 0.0012    | 0         | NA         | NA         |
| NM_001037631 | <i>CTLA4</i>    | 0.776919582008178 | 0                | 2.00E-04      | 1              | 0.0012    | 0         | NA         | NA         |
| NM_005214    | <i>CTLA4</i>    | 0.776919582008178 | 0                | 2.00E-04      | 1              | 0.0012    | 0         | NA         | NA         |
| NM_001198944 | <i>DTNA</i>     | 0.776010904134484 | 0                | 2.00E-04      | 1              | 0.0012    | 0         | NA         | NA         |
| NM_001198943 | <i>DTNA</i>     | 0.776010904134484 | 0                | 2.00E-04      | 1              | 0.0012    | 0         | NA         | NA         |
| NM_001198942 | <i>DTNA</i>     | 0.776010904134484 | 0                | 2.00E-04      | 1              | 0.0012    | 0         | NA         | NA         |
| NM_032980    | <i>DTNA</i>     | 0.776010904134484 | 0                | 2.00E-04      | 1              | 0.0012    | 0         | NA         | NA         |
| NM_032981    | <i>DTNA</i>     | 0.776010904134484 | 0                | 2.00E-04      | 1              | 0.0012    | 0         | NA         | NA         |
| NM_001004695 | <i>OR2T33</i>   | 0.768287142208087 | 0                | 2.00E-04      | 1              | 0.0012    | 0         | NA         | NA         |
| NM_001145026 | <i>PTPRQ</i>    | 0.765561108587006 | 0                | 2.00E-04      | 1              | 0.0012    | 0         | NA         | NA         |
| NM_001007242 | <i>GP2</i>      | 0.762835074965925 | 0                | 2.00E-04      | 1              | 0.0012    | 0         | NA         | NA         |
| NM_001502    | <i>GP2</i>      | 0.762835074965925 | 0                | 2.00E-04      | 1              | 0.0012    | 0         | NA         | NA         |
| NM_001007241 | <i>GP2</i>      | 0.762835074965925 | 0                | 2.00E-04      | 1              | 0.0012    | 0         | NA         | NA         |
| NM_001007240 | <i>GP2</i>      | 0.762835074965925 | 0                | 2.00E-04      | 1              | 0.0012    | 0         | NA         | NA         |
| NM_001025077 | <i>CELF2</i>    | 0.761926397092231 | 0                | 2.00E-04      | 1              | 0.0012    | 0         | NA         | NA         |
| NM_001004759 | <i>OR51T1</i>   | 0.761926397092231 | 0                | 2.00E-04      | 1              | 0.0012    | 0         | NA         | NA         |
| NR_046113    | <i>FLJ16171</i> | 0.754656974102681 | 0                | 2.00E-04      | 1              | 0.0012    | 0         | NA         | NA         |
| NM_000390    | <i>CHM</i>      | 0.749204906860518 | 0                | 2.00E-04      | 1              | 0.0012    | 0         | NA         | NA         |
| NM_001145414 | <i>CHM</i>      | 0.749204906860518 | 0                | 2.00E-04      | 1              | 0.0012    | 0         | NA         | NA         |
| NM_000715    | <i>C4BPA</i>    | 0.734211721944571 | 0                | 2.00E-04      | 1              | 0.0012    | 0         | NA         | NA         |
| NM_005422    | <i>TECTA</i>    | 0.733303044070877 | 0                | 2.00E-04      | 1              | 0.0012    | 0         | NA         | NA         |
| NM_005708    | <i>GPC6</i>     | 0.724670604270786 | 0                | 2.00E-04      | 1              | 0.0012    | 0         | NA         | NA         |
| NM_019617    | <i>GKN1</i>     | 0.718764198091776 | 0                | 2.00E-04      | 1              | 0.0012    | 0         | NA         | NA         |
| NM_178168    | <i>OR10A5</i>   | 0.716492503407542 | 0                | 2.00E-04      | 1              | 0.0012    | 0         | NA         | NA         |
| NM_052939    | <i>FCRL3</i>    | 0.710131758291686 | 0                | 2.00E-04      | 1              | 0.0012    | 0         | NA         | NA         |

|              |                     |                   |   |          |   |        |   |    |    |
|--------------|---------------------|-------------------|---|----------|---|--------|---|----|----|
| NM_005390    | <i>PDHA2</i>        | 0.707405724670604 | 0 | 2.00E-04 | 1 | 0.0012 | 0 | NA | NA |
| NM_021005    | <i>NR2F2</i>        | 0.70649704679691  | 0 | 2.00E-04 | 1 | 0.0012 | 0 | NA | NA |
| NM_001304    | <i>CPD</i>          | 0.689232167196729 | 0 | 2.00E-04 | 1 | 0.0012 | 0 | NA | NA |
| NM_001009894 | <i>C12orf29</i>     | 0.68468877782826  | 0 | 2.00E-04 | 1 | 0.0012 | 0 | NA | NA |
| NM_022150    | <i>NPVF</i>         | 0.684234438891413 | 0 | 2.00E-04 | 1 | 0.0012 | 0 | NA | NA |
| NM_016512    | <i>SPAG11B</i>      | 0.683780099954566 | 0 | 2.00E-04 | 1 | 0.0012 | 0 | NA | NA |
| NM_058203    | <i>SPAG11B</i>      | 0.683780099954566 | 0 | 2.00E-04 | 1 | 0.0012 | 0 | NA | NA |
| NM_058201    | <i>SPAG11B</i>      | 0.683780099954566 | 0 | 2.00E-04 | 1 | 0.0012 | 0 | NA | NA |
| NM_058202    | <i>SPAG11B</i>      | 0.683780099954566 | 0 | 2.00E-04 | 1 | 0.0012 | 0 | NA | NA |
| NM_058200    | <i>SPAG11B</i>      | 0.683780099954566 | 0 | 2.00E-04 | 1 | 0.0012 | 0 | NA | NA |
| NM_001145014 | <i>RFPL4A</i>       | 0.678328032712403 | 0 | 2.00E-04 | 1 | 0.0012 | 0 | NA | NA |
| NR_103775    | <i>LOC100505984</i> | 0.672421626533394 | 0 | 2.00E-04 | 1 | 0.0012 | 0 | NA | NA |
| NM_172060    | <i>EYA1</i>         | 0.672421626533394 | 0 | 2.00E-04 | 1 | 0.0012 | 0 | NA | NA |
| NM_172058    | <i>EYA1</i>         | 0.672421626533394 | 0 | 2.00E-04 | 1 | 0.0012 | 0 | NA | NA |
| NM_172059    | <i>EYA1</i>         | 0.672421626533394 | 0 | 2.00E-04 | 1 | 0.0012 | 0 | NA | NA |
| NR_028067    | <i>OR4N3P</i>       | 0.6715129486597   | 0 | 2.00E-04 | 1 | 0.0012 | 0 | NA | NA |
| NR_103466    | <i>NBPF13P</i>      | 0.6715129486597   | 0 | 2.00E-04 | 1 | 0.0012 | 0 | NA | NA |
| NM_001172517 | <i>SATB2</i>        | 0.671058609722853 | 0 | 2.00E-04 | 1 | 0.0012 | 0 | NA | NA |
| NR_046228    | <i>ANKRD20A12P</i>  | 0.668786915038619 | 0 | 2.00E-04 | 1 | 0.0012 | 0 | NA | NA |
| NM_001261399 | <i>PRB4</i>         | 0.668332576101772 | 0 | 2.00E-04 | 1 | 0.0012 | 0 | NA | NA |
| NM_002723    | <i>PRB4</i>         | 0.668332576101772 | 0 | 2.00E-04 | 1 | 0.0012 | 0 | NA | NA |
| NM_006526    | <i>ZNF217</i>       | 0.663789186733303 | 0 | 2.00E-04 | 1 | 0.0012 | 0 | NA | NA |
| NR_003928    | <i>CHIAP2</i>       | 0.659700136301681 | 0 | 2.00E-04 | 1 | 0.0012 | 0 | NA | NA |
| NM_213608    | <i>C2orf66</i>      | 0.654248069059518 | 0 | 2.00E-04 | 1 | 0.0012 | 0 | NA | NA |
| NM_001001931 | <i>MTUS1</i>        | 0.652430713312131 | 0 | 2.00E-04 | 1 | 0.0012 | 0 | NA | NA |
| NM_021952    | <i>ELAVL4</i>       | 0.651522035438437 | 0 | 2.00E-04 | 1 | 0.0012 | 0 | NA | NA |
| NM_001144774 | <i>ELAVL4</i>       | 0.651522035438437 | 0 | 2.00E-04 | 1 | 0.0012 | 0 | NA | NA |
| NM_001099435 | <i>SPDYE5</i>       | 0.64970467969105  | 0 | 2.00E-04 | 1 | 0.0012 | 0 | NA | NA |
| NM_001013356 | <i>OR8U8</i>        | 0.644252612448887 | 0 | 2.00E-04 | 1 | 0.0012 | 0 | NA | NA |
| NM_001005204 | <i>OR8U1</i>        | 0.644252612448887 | 0 | 2.00E-04 | 1 | 0.0012 | 0 | NA | NA |
| NM_181621    | <i>KRTAP13-2</i>    | 0.644252612448887 | 0 | 2.00E-04 | 1 | 0.0012 | 0 | NA | NA |
| NM_001243081 | <i>ELF5</i>         | 0.641980917764652 | 0 | 2.00E-04 | 1 | 0.0012 | 0 | NA | NA |
| NM_198381    | <i>ELF5</i>         | 0.641980917764652 | 0 | 2.00E-04 | 1 | 0.0012 | 0 | NA | NA |
| NM_001199103 | <i>NT5C1B-RDH14</i> | 0.640163562017265 | 0 | 2.00E-04 | 1 | 0.0012 | 0 | NA | NA |
| NM_001199087 | <i>NT5C1B</i>       | 0.640163562017265 | 0 | 2.00E-04 | 1 | 0.0012 | 0 | NA | NA |
| NM_001199086 | <i>NT5C1B</i>       | 0.640163562017265 | 0 | 2.00E-04 | 1 | 0.0012 | 0 | NA | NA |
| NM_033253    | <i>NT5C1B</i>       | 0.640163562017265 | 0 | 2.00E-04 | 1 | 0.0012 | 0 | NA | NA |
| NM_001199104 | <i>NT5C1B-RDH14</i> | 0.640163562017265 | 0 | 2.00E-04 | 1 | 0.0012 | 0 | NA | NA |
| NM_001199088 | <i>NT5C1B</i>       | 0.640163562017265 | 0 | 2.00E-04 | 1 | 0.0012 | 0 | NA | NA |
| NM_001002006 | <i>NT5C1B</i>       | 0.640163562017265 | 0 | 2.00E-04 | 1 | 0.0012 | 0 | NA | NA |
| NM_001258370 | <i>DIAPH3</i>       | 0.639254884143571 | 0 | 2.00E-04 | 1 | 0.0012 | 0 | NA | NA |

|              |              |                   |                    |          |   |        |   |    |    |
|--------------|--------------|-------------------|--------------------|----------|---|--------|---|----|----|
| NM_030932    | DIAPH3       | 0.639254884143571 | 0                  | 2.00E-04 | 1 | 0.0012 | 0 | NA | NA |
| NM_138800    | TRIM43       | 0.681962744207179 | 0.0481599273057701 | 2.00E-04 | 1 | 0.0012 | 0 | NA | NA |
| NM_153228    | ANKFN1       | 0.633348477964562 | 0                  | 2.00E-04 | 1 | 0.0012 | 0 | NA | NA |
| NM_022915    | MRPL44       | 0.633348477964562 | 0                  | 2.00E-04 | 1 | 0.0012 | 0 | NA | NA |
| NM_001005245 | OR5M11       | 0.632439800090868 | 0                  | 2.00E-04 | 1 | 0.0012 | 0 | NA | NA |
| NM_058248    | DNASE2B      | 0.631076783280327 | 0                  | 2.00E-04 | 1 | 0.0012 | 0 | NA | NA |
| NM_001001821 | OR2T34       | 0.62925942753294  | 0                  | 2.00E-04 | 1 | 0.0012 | 0 | NA | NA |
| NM_001277348 | LOC100996485 | 0.622444343480236 | 0                  | 2.00E-04 | 1 | 0.0012 | 0 | NA | NA |
| NR_030289    | MIR563       | 0.621535665606542 | 0                  | 2.00E-04 | 1 | 0.0012 | 0 | NA | NA |
| NM_001256370 | SAMSN1       | 0.620626987732849 | 0                  | 2.00E-04 | 1 | 0.0012 | 0 | NA | NA |
| NM_020808    | SIPA1L2      | 0.61017719218537  | 0                  | 2.00E-04 | 1 | 0.0012 | 0 | NA | NA |
| NM_080717    | TBX5         | 0.606542480690595 | 0                  | 2.00E-04 | 1 | 0.0012 | 0 | NA | NA |
| NM_000192    | TBX5         | 0.606542480690595 | 0                  | 2.00E-04 | 1 | 0.0012 | 0 | NA | NA |
| NM_003826    | NAPG         | 0.598818718764198 | 0                  | 2.00E-04 | 1 | 0.0012 | 0 | NA | NA |
| NM_006273    | CCL7         | 0.597001363016811 | 0                  | 2.00E-04 | 1 | 0.0012 | 0 | NA | NA |
| NR_102743    | NR2F2-AS1    | 0.594275329395729 | 0                  | 2.00E-04 | 1 | 0.0012 | 0 | NA | NA |
| NR_102744    | NR2F2-AS1    | 0.594275329395729 | 0                  | 2.00E-04 | 1 | 0.0012 | 0 | NA | NA |
| NM_005593    | MYF5         | 0.583825533848251 | 0                  | 2.00E-04 | 1 | 0.0012 | 0 | NA | NA |
| NM_004564    | PET112       | 0.583371194911404 | 0                  | 2.00E-04 | 1 | 0.0012 | 0 | NA | NA |
| NM_001197220 | PDE4D        | 0.583371194911404 | 0                  | 2.00E-04 | 1 | 0.0012 | 0 | NA | NA |
| NR_033798    | CAST         | 0.581099500227169 | 0                  | 2.00E-04 | 1 | 0.0012 | 0 | NA | NA |
| NR_104285    | CAST         | 0.581099500227169 | 0                  | 2.00E-04 | 1 | 0.0012 | 0 | NA | NA |
| NM_001135995 | ATXN3L       | 0.628350749659246 | 0.0495229441163108 | 2.00E-04 | 1 | 0.0012 | 0 | NA | NA |
| NM_153377    | LRIG3        | 0.576556110858701 | 0                  | 2.00E-04 | 1 | 0.0012 | 0 | NA | NA |
| NM_001184749 | SLITRK4      | 0.576556110858701 | 0                  | 2.00E-04 | 1 | 0.0012 | 0 | NA | NA |
| NM_001171195 | ELAVL2       | 0.574738755111313 | 0                  | 2.00E-04 | 1 | 0.0012 | 0 | NA | NA |
| NM_004010    | DMD          | 0.574738755111313 | 0                  | 2.00E-04 | 1 | 0.0012 | 0 | NA | NA |
| NM_004009    | DMD          | 0.574284416174466 | 0                  | 2.00E-04 | 1 | 0.0012 | 0 | NA | NA |
| NM_002190    | IL17A        | 0.573375738300772 | 0                  | 2.00E-04 | 1 | 0.0012 | 0 | NA | NA |
| NM_001005169 | OR52I1       | 0.572921399363925 | 0                  | 2.00E-04 | 1 | 0.0012 | 0 | NA | NA |
| NM_020130    | C8orf4       | 0.570649704679691 | 0                  | 2.00E-04 | 1 | 0.0012 | 0 | NA | NA |
| NM_001145672 | SORBS2       | 0.56792367105861  | 0                  | 2.00E-04 | 1 | 0.0012 | 0 | NA | NA |
| NM_145892    | RBFOX1       | 0.566106315311222 | 0                  | 2.00E-04 | 1 | 0.0012 | 0 | NA | NA |
| NM_145891    | RBFOX1       | 0.566106315311222 | 0                  | 2.00E-04 | 1 | 0.0012 | 0 | NA | NA |
| NM_145893    | RBFOX1       | 0.566106315311222 | 0                  | 2.00E-04 | 1 | 0.0012 | 0 | NA | NA |
| NM_001015001 | CKMT1A       | 0.609722853248523 | 0.044525215810995  | 2.00E-04 | 1 | 0.0012 | 0 | NA | NA |
| NM_016609    | SLC22A17     | 0.560199909132213 | 0                  | 2.00E-04 | 1 | 0.0012 | 0 | NA | NA |
| NM_001242466 | PIK3R1       | 0.558836892321672 | 0                  | 2.00E-04 | 1 | 0.0012 | 0 | NA | NA |
| NM_080872    | UNC5D        | 0.557473875511131 | 0                  | 2.00E-04 | 1 | 0.0012 | 0 | NA | NA |
| NM_021240    | DMRT3        | 0.557019536574284 | 0                  | 2.00E-04 | 1 | 0.0012 | 0 | NA | NA |
| NM_001029869 | PLAC8L1      | 0.556110858700591 | 0                  | 2.00E-04 | 1 | 0.0012 | 0 | NA | NA |

|              |                 |                   |                     |          |   |        |   |    |    |
|--------------|-----------------|-------------------|---------------------|----------|---|--------|---|----|----|
| NM_032181    | <i>EVA1A</i>    | 0.555656519763744 | 0                   | 2.00E-04 | 1 | 0.0012 | 0 | NA | NA |
| NM_001002925 | <i>OR5AP2</i>   | 0.553839164016356 | 0                   | 2.00E-04 | 1 | 0.0012 | 0 | NA | NA |
| NM_194463    | <i>RNF128</i>   | 0.552476147205816 | 0                   | 2.00E-04 | 1 | 0.0012 | 0 | NA | NA |
| NM_005330    | <i>HBE1</i>     | 0.551113130395275 | 0                   | 2.00E-04 | 1 | 0.0012 | 0 | NA | NA |
| NM_080387    | <i>CLEC4D</i>   | 0.550658791458428 | 0                   | 2.00E-04 | 1 | 0.0012 | 0 | NA | NA |
| NM_001135823 | <i>SSPN</i>     | 0.550204452521581 | 0                   | 2.00E-04 | 1 | 0.0012 | 0 | NA | NA |
| NM_012353    | <i>OR1C1</i>    | 0.550204452521581 | 0                   | 2.00E-04 | 1 | 0.0012 | 0 | NA | NA |
| NM_173860    | <i>HOXC12</i>   | 0.546569741026806 | 0                   | 2.00E-04 | 1 | 0.0012 | 0 | NA | NA |
| NM_001018116 | <i>MURC</i>     | 0.546115402089959 | 0                   | 2.00E-04 | 1 | 0.0012 | 0 | NA | NA |
| NM_031962    | <i>KRTAP9-3</i> | 0.545661063153112 | 0                   | 2.00E-04 | 1 | 0.0012 | 0 | NA | NA |
| NM_001136469 | <i>TMEM108</i>  | 0.543389368468878 | 0                   | 2.00E-04 | 1 | 0.0012 | 0 | NA | NA |
| NM_023943    | <i>TMEM108</i>  | 0.543389368468878 | 0                   | 2.00E-04 | 1 | 0.0012 | 0 | NA | NA |
| NM_001010977 | <i>METTL21C</i> | 0.541117673784643 | 0                   | 2.00E-04 | 1 | 0.0012 | 0 | NA | NA |
| NM_001005327 | <i>OR6K3</i>    | 0.54020899591095  | 0                   | 2.00E-04 | 1 | 0.0012 | 0 | NA | NA |
| NM_001178131 | <i>EGF</i>      | 0.539754656974103 | 0                   | 2.00E-04 | 1 | 0.0012 | 0 | NA | NA |
| NM_001963    | <i>EGF</i>      | 0.539754656974103 | 0                   | 2.00E-04 | 1 | 0.0012 | 0 | NA | NA |
| NM_001178130 | <i>EGF</i>      | 0.539754656974103 | 0                   | 2.00E-04 | 1 | 0.0012 | 0 | NA | NA |
| NM_031900    | <i>AGXT2</i>    | 0.539300318037256 | 0                   | 2.00E-04 | 1 | 0.0012 | 0 | NA | NA |
| NM_001168359 | <i>TDRD6</i>    | 0.538391640163562 | 0                   | 2.00E-04 | 1 | 0.0012 | 0 | NA | NA |
| NM_001010870 | <i>TDRD6</i>    | 0.538391640163562 | 0                   | 2.00E-04 | 1 | 0.0012 | 0 | NA | NA |
| NM_001873    | <i>CPE</i>      | 0.537937301226715 | 0                   | 2.00E-04 | 1 | 0.0012 | 0 | NA | NA |
| NM_001004760 | <i>OR51V1</i>   | 0.537482962289868 | 0                   | 2.00E-04 | 1 | 0.0012 | 0 | NA | NA |
| NM_005086    | <i>SSPN</i>     | 0.536119945479328 | 0                   | 2.00E-04 | 1 | 0.0012 | 0 | NA | NA |
| NM_015025    | <i>MYT1L</i>    | 0.535665606542481 | 0                   | 2.00E-04 | 1 | 0.0012 | 0 | NA | NA |
| NM_139266    | <i>STAT1</i>    | 0.533848250795093 | 0                   | 2.00E-04 | 1 | 0.0012 | 0 | NA | NA |
| NM_007315    | <i>STAT1</i>    | 0.533848250795093 | 0                   | 2.00E-04 | 1 | 0.0012 | 0 | NA | NA |
| NM_015537    | <i>NSMF</i>     | 0.533393911858246 | 0                   | 2.00E-04 | 1 | 0.0012 | 0 | NA | NA |
| NM_001130971 | <i>NSMF</i>     | 0.533393911858246 | 0                   | 2.00E-04 | 1 | 0.0012 | 0 | NA | NA |
| NM_001130969 | <i>NSMF</i>     | 0.533393911858246 | 0                   | 2.00E-04 | 1 | 0.0012 | 0 | NA | NA |
| NM_001130970 | <i>NSMF</i>     | 0.533393911858246 | 0                   | 2.00E-04 | 1 | 0.0012 | 0 | NA | NA |
| NM_001178064 | <i>NSMF</i>     | 0.533393911858246 | 0                   | 2.00E-04 | 1 | 0.0012 | 0 | NA | NA |
| NR_030164    | <i>MIR489</i>   | 0.530667878237165 | 0                   | 2.00E-04 | 1 | 0.0012 | 0 | NA | NA |
| NR_024481    | <i>FAM205B</i>  | 0.530667878237165 | 0                   | 2.00E-04 | 1 | 0.0012 | 0 | NA | NA |
| NM_199482    | <i>MOB4</i>     | 0.529304861426624 | 0                   | 2.00E-04 | 1 | 0.0012 | 0 | NA | NA |
| NM_001242506 | <i>GDA</i>      | 0.528850522489777 | 0                   | 2.00E-04 | 1 | 0.0012 | 0 | NA | NA |
| NM_001242505 | <i>GDA</i>      | 0.528850522489777 | 0                   | 2.00E-04 | 1 | 0.0012 | 0 | NA | NA |
| NM_004293    | <i>GDA</i>      | 0.528850522489777 | 0                   | 2.00E-04 | 1 | 0.0012 | 0 | NA | NA |
| NM_203458    | <i>NOTCH2NL</i> | 0.535211267605634 | 0.00681508405270332 | 2.00E-04 | 1 | 0.0012 | 0 | NA | NA |
| NM_002148    | <i>HOXD10</i>   | 0.522944116310768 | 0                   | 2.00E-04 | 1 | 0.0012 | 0 | NA | NA |
| NM_020769    | <i>RGAG1</i>    | 0.52112676056338  | 0                   | 2.00E-04 | 1 | 0.0012 | 0 | NA | NA |
| NM_001144919 | <i>FGFR2</i>    | 0.519309404815993 | 0                   | 2.00E-04 | 1 | 0.0012 | 0 | NA | NA |

|              |                  |                   |                    |          |   |        |   |    |    |
|--------------|------------------|-------------------|--------------------|----------|---|--------|---|----|----|
| NM_000141    | <i>FGFR2</i>     | 0.519309404815993 | 0                  | 2.00E-04 | 1 | 0.0012 | 0 | NA | NA |
| NM_022970    | <i>FGFR2</i>     | 0.519309404815993 | 0                  | 2.00E-04 | 1 | 0.0012 | 0 | NA | NA |
| NM_001144918 | <i>FGFR2</i>     | 0.519309404815993 | 0                  | 2.00E-04 | 1 | 0.0012 | 0 | NA | NA |
| NM_001144917 | <i>FGFR2</i>     | 0.519309404815993 | 0                  | 2.00E-04 | 1 | 0.0012 | 0 | NA | NA |
| NR_073009    | <i>FGFR2</i>     | 0.519309404815993 | 0                  | 2.00E-04 | 1 | 0.0012 | 0 | NA | NA |
| NM_001005470 | <i>OR4B1</i>     | 0.517946388005452 | 0                  | 2.00E-04 | 1 | 0.0012 | 0 | NA | NA |
| NM_012395    | <i>CDK14</i>     | 0.517946388005452 | 0                  | 2.00E-04 | 1 | 0.0012 | 0 | NA | NA |
| NM_152512    | <i>ENTHD1</i>    | 0.515220354384371 | 0                  | 2.00E-04 | 1 | 0.0012 | 0 | NA | NA |
| NM_206947    | <i>TRPM3</i>     | 0.514766015447524 | 0                  | 2.00E-04 | 1 | 0.0012 | 0 | NA | NA |
| NM_206946    | <i>TRPM3</i>     | 0.514766015447524 | 0                  | 2.00E-04 | 1 | 0.0012 | 0 | NA | NA |
| NM_206945    | <i>TRPM3</i>     | 0.514766015447524 | 0                  | 2.00E-04 | 1 | 0.0012 | 0 | NA | NA |
| NM_024971    | <i>TRPM3</i>     | 0.514766015447524 | 0                  | 2.00E-04 | 1 | 0.0012 | 0 | NA | NA |
| NM_206944    | <i>TRPM3</i>     | 0.514766015447524 | 0                  | 2.00E-04 | 1 | 0.0012 | 0 | NA | NA |
| NM_020952    | <i>TRPM3</i>     | 0.514766015447524 | 0                  | 2.00E-04 | 1 | 0.0012 | 0 | NA | NA |
| NM_001007470 | <i>TRPM3</i>     | 0.514766015447524 | 0                  | 2.00E-04 | 1 | 0.0012 | 0 | NA | NA |
| NM_206948    | <i>TRPM3</i>     | 0.514766015447524 | 0                  | 2.00E-04 | 1 | 0.0012 | 0 | NA | NA |
| NM_001005213 | <i>OR9G1</i>     | 0.512494320763289 | 0                  | 2.00E-04 | 1 | 0.0012 | 0 | NA | NA |
| NM_001013358 | <i>OR9G9</i>     | 0.512494320763289 | 0                  | 2.00E-04 | 1 | 0.0012 | 0 | NA | NA |
| NM_007374    | <i>SIX6</i>      | 0.508859609268514 | 0                  | 2.00E-04 | 1 | 0.0012 | 0 | NA | NA |
| NM_207422    | <i>FLJ44635</i>  | 0.508405270331667 | 0                  | 2.00E-04 | 1 | 0.0012 | 0 | NA | NA |
| NM_033035    | <i>TSLP</i>      | 0.507950931394821 | 0                  | 2.00E-04 | 1 | 0.0012 | 0 | NA | NA |
| NM_199462    | <i>DSTYK</i>     | 0.507496592457974 | 0                  | 2.00E-04 | 1 | 0.0012 | 0 | NA | NA |
| NM_015375    | <i>DSTYK</i>     | 0.507496592457974 | 0                  | 2.00E-04 | 1 | 0.0012 | 0 | NA | NA |
| NR_046827    | <i>LNX1-AS2</i>  | 0.507042253521127 | 0                  | 2.00E-04 | 1 | 0.0012 | 0 | NA | NA |
| NR_015358    | <i>LINC00643</i> | 0.506133575647433 | 0                  | 2.00E-04 | 1 | 0.0012 | 0 | NA | NA |
| NM_002487    | <i>NDN</i>       | 0.506133575647433 | 0                  | 2.00E-04 | 1 | 0.0012 | 0 | NA | NA |
| NM_004138    | <i>KRT33A</i>    | 0.505679236710586 | 0                  | 2.00E-04 | 1 | 0.0012 | 0 | NA | NA |
| NM_001193347 | <i>MEF2C</i>     | 0.63789186733303  | 0.134029986369832  | 2.00E-04 | 1 | 0.0012 | 0 | NA | NA |
| NM_001131005 | <i>MEF2C</i>     | 0.63789186733303  | 0.134029986369832  | 2.00E-04 | 1 | 0.0012 | 0 | NA | NA |
| NM_004482    | <i>GALNT3</i>    | 0.500227169468423 | 0                  | 2.00E-04 | 1 | 0.0012 | 0 | NA | NA |
| NM_001004688 | <i>OR2M2</i>     | 0.496138119036801 | 0                  | 2.00E-04 | 1 | 0.0012 | 0 | NA | NA |
| NM_001005214 | <i>LRRC52</i>    | 0.495229441163108 | 0                  | 2.00E-04 | 1 | 0.0012 | 0 | NA | NA |
| NM_006250    | <i>PRH1</i>      | 0.495229441163108 | 0                  | 2.00E-04 | 1 | 0.0012 | 0 | NA | NA |
| NM_020374    | <i>C12orf4</i>   | 0.492957746478873 | 0                  | 2.00E-04 | 1 | 0.0012 | 0 | NA | NA |
| NM_006249    | <i>PRB3</i>      | 0.492049068605179 | 0                  | 2.00E-04 | 1 | 0.0012 | 0 | NA | NA |
| NM_001172814 | <i>SLC30A8</i>   | 0.503861880963199 | 0.0127214902317129 | 2.00E-04 | 1 | 0.0012 | 0 | NA | NA |
| NM_173851    | <i>SLC30A8</i>   | 0.503861880963199 | 0.0127214902317129 | 2.00E-04 | 1 | 0.0012 | 0 | NA | NA |
| NM_183234    | <i>RAB27A</i>    | 0.491140390731486 | 0                  | 2.00E-04 | 1 | 0.0012 | 0 | NA | NA |
| NM_013372    | <i>GREM1</i>     | 0.489777373920945 | 0                  | 2.00E-04 | 1 | 0.0012 | 0 | NA | NA |
| NM_001191322 | <i>GREM1</i>     | 0.489777373920945 | 0                  | 2.00E-04 | 1 | 0.0012 | 0 | NA | NA |
| NM_001191323 | <i>GREM1</i>     | 0.489777373920945 | 0                  | 2.00E-04 | 1 | 0.0012 | 0 | NA | NA |

|              |                 |                   |                    |          |   |        |   |    |    |
|--------------|-----------------|-------------------|--------------------|----------|---|--------|---|----|----|
| NM_138574    | <i>HDGFL1</i>   | 0.489777373920945 | 0                  | 2.00E-04 | 1 | 0.0012 | 0 | NA | NA |
| NM_005523    | <i>HOXA11</i>   | 0.487960018173557 | 0                  | 2.00E-04 | 1 | 0.0012 | 0 | NA | NA |
| NM_020868    | <i>DPP10</i>    | 0.48614266242617  | 0                  | 2.00E-04 | 1 | 0.0012 | 0 | NA | NA |
| NM_021101    | <i>CLDN1</i>    | 0.485233984552476 | 0                  | 2.00E-04 | 1 | 0.0012 | 0 | NA | NA |
| NR_026806    | <i>FLJ13224</i> | 0.54157201272149  | 0.0599727396637892 | 2.00E-04 | 1 | 0.0012 | 0 | NA | NA |
| NM_006557    | <i>DMRT2</i>    | 0.480690595184007 | 0                  | 2.00E-04 | 1 | 0.0012 | 0 | NA | NA |
| NM_173519    | <i>CLVS1</i>    | 0.48023625624716  | 0                  | 2.00E-04 | 1 | 0.0012 | 0 | NA | NA |
| NM_014247    | <i>RAPGEF2</i>  | 0.479327578373467 | 0                  | 2.00E-04 | 1 | 0.0012 | 0 | NA | NA |
| NM_001130865 | <i>DMRT2</i>    | 0.477055883689232 | 0                  | 2.00E-04 | 1 | 0.0012 | 0 | NA | NA |
| NM_020154    | <i>EMC7</i>     | 0.476601544752385 | 0                  | 2.00E-04 | 1 | 0.0012 | 0 | NA | NA |
| NM_198904    | <i>GABRG2</i>   | 0.476147205815538 | 0                  | 2.00E-04 | 1 | 0.0012 | 0 | NA | NA |
| NM_198903    | <i>GABRG2</i>   | 0.476147205815538 | 0                  | 2.00E-04 | 1 | 0.0012 | 0 | NA | NA |
| NM_000816    | <i>GABRG2</i>   | 0.476147205815538 | 0                  | 2.00E-04 | 1 | 0.0012 | 0 | NA | NA |
| NM_152688    | <i>KHDRBS2</i>  | 0.476147205815538 | 0                  | 2.00E-04 | 1 | 0.0012 | 0 | NA | NA |
| NM_001012763 | <i>GNRHR</i>    | 0.475692866878692 | 0                  | 2.00E-04 | 1 | 0.0012 | 0 | NA | NA |
| NM_000406    | <i>GNRHR</i>    | 0.475692866878692 | 0                  | 2.00E-04 | 1 | 0.0012 | 0 | NA | NA |
| NM_147180    | <i>PPP3R2</i>   | 0.475238527941845 | 0                  | 2.00E-04 | 1 | 0.0012 | 0 | NA | NA |
| NM_001159642 | <i>BNIPL</i>    | 0.47296683325761  | 0                  | 2.00E-04 | 1 | 0.0012 | 0 | NA | NA |
| NM_138278    | <i>BNIPL</i>    | 0.47296683325761  | 0                  | 2.00E-04 | 1 | 0.0012 | 0 | NA | NA |
| NM_001145671 | <i>SORBS2</i>   | 0.472512494320763 | 0                  | 2.00E-04 | 1 | 0.0012 | 0 | NA | NA |
| NM_012450    | <i>SLC13A4</i>  | 0.472512494320763 | 0                  | 2.00E-04 | 1 | 0.0012 | 0 | NA | NA |
| NM_001244961 | <i>FRMD3</i>    | 0.470695138573376 | 0                  | 2.00E-04 | 1 | 0.0012 | 0 | NA | NA |
| NM_199354    | <i>PRB1</i>     | 0.571558382553385 | 0.100863243980009  | 2.00E-04 | 1 | 0.0012 | 0 | NA | NA |
| NM_199353    | <i>PRB1</i>     | 0.571558382553385 | 0.100863243980009  | 2.00E-04 | 1 | 0.0012 | 0 | NA | NA |
| NM_005039    | <i>PRB1</i>     | 0.571558382553385 | 0.100863243980009  | 2.00E-04 | 1 | 0.0012 | 0 | NA | NA |
| NM_001193329 | <i>C9orf3</i>   | 0.470240799636529 | 0                  | 2.00E-04 | 1 | 0.0012 | 0 | NA | NA |
| NM_130897    | <i>DYNLRB2</i>  | 0.469786460699682 | 0                  | 2.00E-04 | 1 | 0.0012 | 0 | NA | NA |
| NR_029374    | <i>LEF1-AS1</i> | 0.469786460699682 | 0                  | 2.00E-04 | 1 | 0.0012 | 0 | NA | NA |
| NM_001001995 | <i>GPM6B</i>    | 0.467060427078601 | 0                  | 2.00E-04 | 1 | 0.0012 | 0 | NA | NA |
| NM_005278    | <i>GPM6B</i>    | 0.467060427078601 | 0                  | 2.00E-04 | 1 | 0.0012 | 0 | NA | NA |
| NM_001001996 | <i>GPM6B</i>    | 0.467060427078601 | 0                  | 2.00E-04 | 1 | 0.0012 | 0 | NA | NA |
| NM_001004756 | <i>OR51M1</i>   | 0.466606088141754 | 0                  | 2.00E-04 | 1 | 0.0012 | 0 | NA | NA |
| NM_004592    | <i>SFSWAP</i>   | 0.466606088141754 | 0                  | 2.00E-04 | 1 | 0.0012 | 0 | NA | NA |
| NM_001261411 | <i>SFSWAP</i>   | 0.466606088141754 | 0                  | 2.00E-04 | 1 | 0.0012 | 0 | NA | NA |
| NM_002421    | <i>MMP1</i>     | 0.466606088141754 | 0                  | 2.00E-04 | 1 | 0.0012 | 0 | NA | NA |
| NM_001145938 | <i>MMP1</i>     | 0.466606088141754 | 0                  | 2.00E-04 | 1 | 0.0012 | 0 | NA | NA |
| NM_019066    | <i>MAGEL2</i>   | 0.466606088141754 | 0                  | 2.00E-04 | 1 | 0.0012 | 0 | NA | NA |
| NM_004781    | <i>VAMP3</i>    | 0.466151749204907 | 0                  | 2.00E-04 | 1 | 0.0012 | 0 | NA | NA |
| NM_001205259 | <i>TP53TG3C</i> | 0.46569741026806  | 0                  | 2.00E-04 | 1 | 0.0012 | 0 | NA | NA |
| NM_001205260 | <i>TP53TG3C</i> | 0.46569741026806  | 0                  | 2.00E-04 | 1 | 0.0012 | 0 | NA | NA |
| NM_001099687 | <i>TP53TG3B</i> | 0.46569741026806  | 0                  | 2.00E-04 | 1 | 0.0012 | 0 | NA | NA |



|              |             |                   |                    |          |   |        |   |    |    |
|--------------|-------------|-------------------|--------------------|----------|---|--------|---|----|----|
| NM_016212    | TP53TG3     | 0.46569741026806  | 0                  | 2.00E-04 | 1 | 0.0012 | 0 | NA | NA |
| NM_001205265 | TP53TG3B    | 0.46569741026806  | 0                  | 2.00E-04 | 1 | 0.0012 | 0 | NA | NA |
| NM_001267813 | TP53TG3     | 0.46569741026806  | 0                  | 2.00E-04 | 1 | 0.0012 | 0 | NA | NA |
| NM_030960    | SPACA1      | 0.465243071331213 | 0                  | 2.00E-04 | 1 | 0.0012 | 0 | NA | NA |
| NR_003572    | RPL23AP53   | 0.464334393457519 | 0                  | 2.00E-04 | 1 | 0.0012 | 0 | NA | NA |
| NM_001127505 | ASAH1       | 0.464334393457519 | 0                  | 2.00E-04 | 1 | 0.0012 | 0 | NA | NA |
| NM_004315    | ASAH1       | 0.464334393457519 | 0                  | 2.00E-04 | 1 | 0.0012 | 0 | NA | NA |
| NM_001004458 | OR1S1       | 0.463880054520672 | 0                  | 2.00E-04 | 1 | 0.0012 | 0 | NA | NA |
| NM_006687    | ACTL7A      | 0.463880054520672 | 0                  | 2.00E-04 | 1 | 0.0012 | 0 | NA | NA |
| NR_051997    | ZNF33BP1    | 0.463425715583826 | 0                  | 2.00E-04 | 1 | 0.0012 | 0 | NA | NA |
| NM_018073    | TRIM68      | 0.462971376646979 | 0                  | 2.00E-04 | 1 | 0.0012 | 0 | NA | NA |
| NM_016227    | SUCO        | 0.462517037710132 | 0                  | 2.00E-04 | 1 | 0.0012 | 0 | NA | NA |
| NM_152485    | C1orf74     | 0.462517037710132 | 0                  | 2.00E-04 | 1 | 0.0012 | 0 | NA | NA |
| NM_001141917 | FAM205A     | 0.462062698773285 | 0                  | 2.00E-04 | 1 | 0.0012 | 0 | NA | NA |
| NM_001204070 | ANKS1B      | 0.461608359836438 | 0                  | 2.00E-04 | 1 | 0.0012 | 0 | NA | NA |
| NM_001204069 | ANKS1B      | 0.461608359836438 | 0                  | 2.00E-04 | 1 | 0.0012 | 0 | NA | NA |
| NM_001204068 | ANKS1B      | 0.461608359836438 | 0                  | 2.00E-04 | 1 | 0.0012 | 0 | NA | NA |
| NM_181670    | ANKS1B      | 0.461608359836438 | 0                  | 2.00E-04 | 1 | 0.0012 | 0 | NA | NA |
| NM_020140    | ANKS1B      | 0.461608359836438 | 0                  | 2.00E-04 | 1 | 0.0012 | 0 | NA | NA |
| NM_001127651 | NCF2        | 0.460699681962744 | 0                  | 2.00E-04 | 1 | 0.0012 | 0 | NA | NA |
| NM_002871    | RAB1F       | 0.460245343025897 | 0                  | 2.00E-04 | 1 | 0.0012 | 0 | NA | NA |
| NM_033049    | MUC13       | 0.459336665152204 | 0                  | 2.00E-04 | 1 | 0.0012 | 0 | NA | NA |
| NR_003337    | SNORD116-23 | 0.457519309404816 | 0                  | 2.00E-04 | 1 | 0.0012 | 0 | NA | NA |
| NM_000576    | IL1B        | 0.457519309404816 | 0                  | 2.00E-04 | 1 | 0.0012 | 0 | NA | NA |
| NM_007281    | SCRG1       | 0.457064970467969 | 0                  | 2.00E-04 | 1 | 0.0012 | 0 | NA | NA |
| NM_001257964 | BOD1L2      | 0.456156292594275 | 0                  | 2.00E-04 | 1 | 0.0012 | 0 | NA | NA |
| NM_001122634 | CPS1        | 0.455701953657428 | 0                  | 2.00E-04 | 1 | 0.0012 | 0 | NA | NA |
| NM_001242699 | ENO4        | 0.454793275783735 | 0                  | 2.00E-04 | 1 | 0.0012 | 0 | NA | NA |
| NR_046449    | LOC374443   | 0.454793275783735 | 0                  | 2.00E-04 | 1 | 0.0012 | 0 | NA | NA |
| NM_001261830 | SERPINB7    | 0.454793275783735 | 0                  | 2.00E-04 | 1 | 0.0012 | 0 | NA | NA |
| NR_002940    | LRR37A4P    | 0.454338936846888 | 0                  | 2.00E-04 | 1 | 0.0012 | 0 | NA | NA |
| NR_038877    | LOC286189   | 0.453430258973194 | 0                  | 2.00E-04 | 1 | 0.0012 | 0 | NA | NA |
| NM_018958    | NPAP1       | 0.452975920036347 | 0                  | 2.00E-04 | 1 | 0.0012 | 0 | NA | NA |
| NM_003666    | BLZF1       | 0.452067242162653 | 0                  | 2.00E-04 | 1 | 0.0012 | 0 | NA | NA |
| NM_001040283 | DMRTC2      | 0.452067242162653 | 0                  | 2.00E-04 | 1 | 0.0012 | 0 | NA | NA |
| NM_001837    | CCR3        | 0.452067242162653 | 0                  | 2.00E-04 | 1 | 0.0012 | 0 | NA | NA |
| NM_001164680 | CCR3        | 0.452067242162653 | 0                  | 2.00E-04 | 1 | 0.0012 | 0 | NA | NA |
| NM_178328    | CCR3        | 0.452067242162653 | 0                  | 2.00E-04 | 1 | 0.0012 | 0 | NA | NA |
| NM_178329    | CCR3        | 0.452067242162653 | 0                  | 2.00E-04 | 1 | 0.0012 | 0 | NA | NA |
| NM_001126328 | LNX1        | 0.507496592457974 | 0.0558836892321672 | 2.00E-04 | 1 | 0.0012 | 0 | NA | NA |
| NM_017757    | ZNF407      | 0.451612903225806 | 0                  | 2.00E-04 | 1 | 0.0012 | 0 | NA | NA |

|              |            |                   |   |          |   |        |   |    |    |
|--------------|------------|-------------------|---|----------|---|--------|---|----|----|
| NM_001146189 | ZNF407     | 0.451612903225806 | 0 | 2.00E-04 | 1 | 0.0012 | 0 | NA | NA |
| NM_001146190 | ZNF407     | 0.451612903225806 | 0 | 2.00E-04 | 1 | 0.0012 | 0 | NA | NA |
| NR_102753    | SPATA8-AS1 | 0.45115856428896  | 0 | 2.00E-04 | 1 | 0.0012 | 0 | NA | NA |
| NM_001024666 | SH3KBP1    | 0.450704225352113 | 0 | 2.00E-04 | 1 | 0.0012 | 0 | NA | NA |
| NM_001550    | IFRD1      | 0.449795547478419 | 0 | 2.00E-04 | 1 | 0.0012 | 0 | NA | NA |
| NM_003784    | SERPINB7   | 0.447978191731031 | 0 | 2.00E-04 | 1 | 0.0012 | 0 | NA | NA |
| NM_001261831 | SERPINB7   | 0.447978191731031 | 0 | 2.00E-04 | 1 | 0.0012 | 0 | NA | NA |
| NM_001001325 | SPINK14    | 0.447978191731031 | 0 | 2.00E-04 | 1 | 0.0012 | 0 | NA | NA |
| NM_018068    | PIWIL2     | 0.447978191731031 | 0 | 2.00E-04 | 1 | 0.0012 | 0 | NA | NA |
| NM_017409    | HOXC10     | 0.447523852794184 | 0 | 2.00E-04 | 1 | 0.0012 | 0 | NA | NA |
| NM_172313    | CSF3R      | 0.447069513857338 | 0 | 2.00E-04 | 1 | 0.0012 | 0 | NA | NA |
| NM_156039    | CSF3R      | 0.447069513857338 | 0 | 2.00E-04 | 1 | 0.0012 | 0 | NA | NA |
| NM_000760    | CSF3R      | 0.447069513857338 | 0 | 2.00E-04 | 1 | 0.0012 | 0 | NA | NA |
| NM_001282855 | IQUB       | 0.446615174920491 | 0 | 2.00E-04 | 1 | 0.0012 | 0 | NA | NA |
| NR_104244    | IQUB       | 0.446615174920491 | 0 | 2.00E-04 | 1 | 0.0012 | 0 | NA | NA |
| NM_004985    | KRAS       | 0.443889141299409 | 0 | 2.00E-04 | 1 | 0.0012 | 0 | NA | NA |
| NM_033360    | KRAS       | 0.443889141299409 | 0 | 2.00E-04 | 1 | 0.0012 | 0 | NA | NA |
| NM_199000    | LHFPL3     | 0.442980463425716 | 0 | 2.00E-04 | 1 | 0.0012 | 0 | NA | NA |
| NR_102754    | SPATA8-AS1 | 0.442980463425716 | 0 | 2.00E-04 | 1 | 0.0012 | 0 | NA | NA |
| NM_001256827 | SMG6       | 0.442980463425716 | 0 | 2.00E-04 | 1 | 0.0012 | 0 | NA | NA |
| NM_014891    | PDAP1      | 0.442980463425716 | 0 | 2.00E-04 | 1 | 0.0012 | 0 | NA | NA |
| NM_003068    | SNAI2      | 0.442980463425716 | 0 | 2.00E-04 | 1 | 0.0012 | 0 | NA | NA |
| NR_047005    | LINC00381  | 0.442526124488869 | 0 | 2.00E-04 | 1 | 0.0012 | 0 | NA | NA |
| NM_173499    | SPATA8     | 0.442526124488869 | 0 | 2.00E-04 | 1 | 0.0012 | 0 | NA | NA |
| NM_004580    | RAB27A     | 0.442071785552022 | 0 | 2.00E-04 | 1 | 0.0012 | 0 | NA | NA |
| NM_002173    | IFNA16     | 0.442071785552022 | 0 | 2.00E-04 | 1 | 0.0012 | 0 | NA | NA |
| NM_052905    | FMNL2      | 0.441617446615175 | 0 | 2.00E-04 | 1 | 0.0012 | 0 | NA | NA |
| NM_001099338 | NUTM2A     | 0.440708768741481 | 0 | 2.00E-04 | 1 | 0.0012 | 0 | NA | NA |
| NM_001081552 | SPAG11A    | 0.43934575193094  | 0 | 2.00E-04 | 1 | 0.0012 | 0 | NA | NA |
| NM_001171653 | ZEB2       | 0.438891412994094 | 0 | 2.00E-04 | 1 | 0.0012 | 0 | NA | NA |
| NM_014795    | ZEB2       | 0.438891412994094 | 0 | 2.00E-04 | 1 | 0.0012 | 0 | NA | NA |
| NR_033258    | ZEB2       | 0.438891412994094 | 0 | 2.00E-04 | 1 | 0.0012 | 0 | NA | NA |
| NM_001257403 | VSIG4      | 0.438891412994094 | 0 | 2.00E-04 | 1 | 0.0012 | 0 | NA | NA |
| NM_001100431 | VSIG4      | 0.438891412994094 | 0 | 2.00E-04 | 1 | 0.0012 | 0 | NA | NA |
| NM_007268    | VSIG4      | 0.438891412994094 | 0 | 2.00E-04 | 1 | 0.0012 | 0 | NA | NA |
| NM_001184831 | VSIG4      | 0.438891412994094 | 0 | 2.00E-04 | 1 | 0.0012 | 0 | NA | NA |
| NM_001184830 | VSIG4      | 0.438891412994094 | 0 | 2.00E-04 | 1 | 0.0012 | 0 | NA | NA |
| NM_145235    | FANK1      | 0.438437074057247 | 0 | 2.00E-04 | 1 | 0.0012 | 0 | NA | NA |
| NM_022359    | PDE4DIP    | 0.438437074057247 | 0 | 2.00E-04 | 1 | 0.0012 | 0 | NA | NA |
| NM_024503    | HIVEP3     | 0.4379827351204   | 0 | 2.00E-04 | 1 | 0.0012 | 0 | NA | NA |
| NM_001127714 | HIVEP3     | 0.4379827351204   | 0 | 2.00E-04 | 1 | 0.0012 | 0 | NA | NA |

|              |          |                   |   |          |   |        |   |    |    |
|--------------|----------|-------------------|---|----------|---|--------|---|----|----|
| NR_038260    | HIVEP3   | 0.4379827351204   | 0 | 2.00E-04 | 1 | 0.0012 | 0 | NA | NA |
| NM_006393    | NEBL     | 0.4379827351204   | 0 | 2.00E-04 | 1 | 0.0012 | 0 | NA | NA |
| NM_001198617 | MAP7     | 0.437528396183553 | 0 | 2.00E-04 | 1 | 0.0012 | 0 | NA | NA |
| NM_001198616 | MAP7     | 0.437528396183553 | 0 | 2.00E-04 | 1 | 0.0012 | 0 | NA | NA |
| NM_003980    | MAP7     | 0.437528396183553 | 0 | 2.00E-04 | 1 | 0.0012 | 0 | NA | NA |
| NM_006896    | HOXA7    | 0.436619718309859 | 0 | 2.00E-04 | 1 | 0.0012 | 0 | NA | NA |
| NM_001270422 | KCNJ16   | 0.435711040436165 | 0 | 2.00E-04 | 1 | 0.0012 | 0 | NA | NA |
| NM_170741    | KCNJ16   | 0.435711040436165 | 0 | 2.00E-04 | 1 | 0.0012 | 0 | NA | NA |
| NM_018658    | KCNJ16   | 0.435711040436165 | 0 | 2.00E-04 | 1 | 0.0012 | 0 | NA | NA |
| NM_182913    | SYNE2    | 0.435256701499318 | 0 | 2.00E-04 | 1 | 0.0012 | 0 | NA | NA |
| NM_020358    | TRIM49   | 0.435256701499318 | 0 | 2.00E-04 | 1 | 0.0012 | 0 | NA | NA |
| NR_037711    | RAD51D   | 0.435256701499318 | 0 | 2.00E-04 | 1 | 0.0012 | 0 | NA | NA |
| NM_002878    | RAD51D   | 0.435256701499318 | 0 | 2.00E-04 | 1 | 0.0012 | 0 | NA | NA |
| NR_037712    | RAD51D   | 0.435256701499318 | 0 | 2.00E-04 | 1 | 0.0012 | 0 | NA | NA |
| NM_001142571 | RAD51D   | 0.435256701499318 | 0 | 2.00E-04 | 1 | 0.0012 | 0 | NA | NA |
| NM_133629    | RAD51D   | 0.435256701499318 | 0 | 2.00E-04 | 1 | 0.0012 | 0 | NA | NA |
| NM_002527    | NTF3     | 0.434348023625625 | 0 | 2.00E-04 | 1 | 0.0012 | 0 | NA | NA |
| NM_152501    | PYHIN1   | 0.432985006815084 | 0 | 2.00E-04 | 1 | 0.0012 | 0 | NA | NA |
| NM_198928    | PYHIN1   | 0.432985006815084 | 0 | 2.00E-04 | 1 | 0.0012 | 0 | NA | NA |
| NM_198930    | PYHIN1   | 0.432985006815084 | 0 | 2.00E-04 | 1 | 0.0012 | 0 | NA | NA |
| NM_198929    | PYHIN1   | 0.432985006815084 | 0 | 2.00E-04 | 1 | 0.0012 | 0 | NA | NA |
| NM_177437    | TAS2R60  | 0.432985006815084 | 0 | 2.00E-04 | 1 | 0.0012 | 0 | NA | NA |
| NM_001166276 | ARHGAP25 | 0.43207632894139  | 0 | 2.00E-04 | 1 | 0.0012 | 0 | NA | NA |
| NM_014882    | ARHGAP25 | 0.43207632894139  | 0 | 2.00E-04 | 1 | 0.0012 | 0 | NA | NA |
| NM_004967    | IBSP     | 0.43207632894139  | 0 | 2.00E-04 | 1 | 0.0012 | 0 | NA | NA |
| NR_027514    | CCNDBP1  | 0.431621990004543 | 0 | 2.00E-04 | 1 | 0.0012 | 0 | NA | NA |
| NR_027513    | CCNDBP1  | 0.431621990004543 | 0 | 2.00E-04 | 1 | 0.0012 | 0 | NA | NA |
| NM_012142    | CCNDBP1  | 0.431621990004543 | 0 | 2.00E-04 | 1 | 0.0012 | 0 | NA | NA |
| NR_045999    | CCNDBP1  | 0.431621990004543 | 0 | 2.00E-04 | 1 | 0.0012 | 0 | NA | NA |
| NR_045998    | CCNDBP1  | 0.431621990004543 | 0 | 2.00E-04 | 1 | 0.0012 | 0 | NA | NA |
| NM_001278733 | TAGAP    | 0.431167651067697 | 0 | 2.00E-04 | 1 | 0.0012 | 0 | NA | NA |
| NM_203454    | APOBEC4  | 0.43071331213085  | 0 | 2.00E-04 | 1 | 0.0012 | 0 | NA | NA |
| NM_001204066 | ANKS1B   | 0.43071331213085  | 0 | 2.00E-04 | 1 | 0.0012 | 0 | NA | NA |
| NM_058206    | SPAG11B  | 0.430258973194003 | 0 | 2.00E-04 | 1 | 0.0012 | 0 | NA | NA |
| NM_058207    | SPAG11B  | 0.430258973194003 | 0 | 2.00E-04 | 1 | 0.0012 | 0 | NA | NA |
| NM_001005185 | OR6N1    | 0.428895956383462 | 0 | 2.00E-04 | 1 | 0.0012 | 0 | NA | NA |
| NR_026867    | ZNF300P1 | 0.428441617446615 | 0 | 2.00E-04 | 1 | 0.0012 | 0 | NA | NA |
| NM_145690    | YWHAZ    | 0.428441617446615 | 0 | 2.00E-04 | 1 | 0.0012 | 0 | NA | NA |
| NM_001166688 | PFKM     | 0.427987278509768 | 0 | 2.00E-04 | 1 | 0.0012 | 0 | NA | NA |
| NM_001166687 | PFKM     | 0.427987278509768 | 0 | 2.00E-04 | 1 | 0.0012 | 0 | NA | NA |
| NM_000301    | PLG      | 0.426624261699228 | 0 | 2.00E-04 | 1 | 0.0012 | 0 | NA | NA |

|              |              |                   |                     |          |   |        |   |    |    |
|--------------|--------------|-------------------|---------------------|----------|---|--------|---|----|----|
| NM_001168338 | PLG          | 0.426624261699228 | 0                   | 2.00E-04 | 1 | 0.0012 | 0 | NA | NA |
| NM_021094    | SLCO1A2      | 0.426169922762381 | 0                   | 2.00E-04 | 1 | 0.0012 | 0 | NA | NA |
| NM_001004757 | OR51Q1       | 0.425715583825534 | 0                   | 2.00E-04 | 1 | 0.0012 | 0 | NA | NA |
| NM_020372    | SLC22A17     | 0.425715583825534 | 0                   | 2.00E-04 | 1 | 0.0012 | 0 | NA | NA |
| NM_014898    | ZFP30        | 0.425715583825534 | 0                   | 2.00E-04 | 1 | 0.0012 | 0 | NA | NA |
| NM_002922    | RGS1         | 0.425261244888687 | 0                   | 2.00E-04 | 1 | 0.0012 | 0 | NA | NA |
| NM_171829    | KCNMB3       | 0.425261244888687 | 0                   | 2.00E-04 | 1 | 0.0012 | 0 | NA | NA |
| NR_028135    | KCNMB3       | 0.425261244888687 | 0                   | 2.00E-04 | 1 | 0.0012 | 0 | NA | NA |
| NM_031961    | KRTAP9-2     | 0.42480690595184  | 0                   | 2.00E-04 | 1 | 0.0012 | 0 | NA | NA |
| NM_145739    | OSBPL6       | 0.424352567014993 | 0                   | 2.00E-04 | 1 | 0.0012 | 0 | NA | NA |
| NM_001001991 | PAMR1        | 0.424352567014993 | 0                   | 2.00E-04 | 1 | 0.0012 | 0 | NA | NA |
| NM_015430    | PAMR1        | 0.424352567014993 | 0                   | 2.00E-04 | 1 | 0.0012 | 0 | NA | NA |
| NM_001282676 | PAMR1        | 0.424352567014993 | 0                   | 2.00E-04 | 1 | 0.0012 | 0 | NA | NA |
| NR_027053    | LOC646214    | 0.422989550204453 | 0                   | 2.00E-04 | 1 | 0.0012 | 0 | NA | NA |
| NM_001102608 | COL6A6       | 0.422080872330759 | 0                   | 2.00E-04 | 1 | 0.0012 | 0 | NA | NA |
| NR_003921    | PMCHL1       | 0.422080872330759 | 0                   | 2.00E-04 | 1 | 0.0012 | 0 | NA | NA |
| NR_002575    | SNORA27      | 0.421626533393912 | 0                   | 2.00E-04 | 1 | 0.0012 | 0 | NA | NA |
| NR_002574    | SNORD102     | 0.421626533393912 | 0                   | 2.00E-04 | 1 | 0.0012 | 0 | NA | NA |
| NR_002163    | OR7E37P      | 0.421626533393912 | 0                   | 2.00E-04 | 1 | 0.0012 | 0 | NA | NA |
| NM_130390    | TRIM34       | 0.423898228078146 | 0.00227169468423444 | 2.00E-04 | 1 | 0.0012 | 0 | NA | NA |
| NM_001199119 | TRIM39-RPP21 | 0.420263516583371 | 0                   | 2.00E-04 | 1 | 0.0012 | 0 | NA | NA |
| NM_002099    | GYP A        | 0.420263516583371 | 0                   | 2.00E-04 | 1 | 0.0012 | 0 | NA | NA |
| NM_001145155 | NR2F2        | 0.419809177646524 | 0                   | 2.00E-04 | 1 | 0.0012 | 0 | NA | NA |
| NR_038440    | TBX5-AS1     | 0.512039981826443 | 0.0926851431167651  | 2.00E-04 | 1 | 0.0012 | 0 | NA | NA |
| NM_001004750 | OR51B6       | 0.418446160835984 | 0                   | 2.00E-04 | 1 | 0.0012 | 0 | NA | NA |
| NM_004826    | ECEL1        | 0.418446160835984 | 0                   | 2.00E-04 | 1 | 0.0012 | 0 | NA | NA |
| NM_001001921 | OR5AS1       | 0.41753748296229  | 0                   | 2.00E-04 | 1 | 0.0012 | 0 | NA | NA |
| NM_001007537 | C1QTNF9B     | 0.417083144025443 | 0                   | 2.00E-04 | 1 | 0.0012 | 0 | NA | NA |
| NM_031854    | KRTAP4-12    | 0.417083144025443 | 0                   | 2.00E-04 | 1 | 0.0012 | 0 | NA | NA |
| NM_001031848 | SERPINB8     | 0.416628805088596 | 0                   | 2.00E-04 | 1 | 0.0012 | 0 | NA | NA |
| NM_198833    | SERPINB8     | 0.416628805088596 | 0                   | 2.00E-04 | 1 | 0.0012 | 0 | NA | NA |
| NM_001276490 | SERPINB8     | 0.416628805088596 | 0                   | 2.00E-04 | 1 | 0.0012 | 0 | NA | NA |
| NM_002640    | SERPINB8     | 0.416628805088596 | 0                   | 2.00E-04 | 1 | 0.0012 | 0 | NA | NA |
| NM_002286    | LAG3         | 0.416174466151749 | 0                   | 2.00E-04 | 1 | 0.0012 | 0 | NA | NA |
| NM_014483    | RBMS3        | 0.415720127214902 | 0                   | 2.00E-04 | 1 | 0.0012 | 0 | NA | NA |
| NM_001177712 | RBMS3        | 0.415720127214902 | 0                   | 2.00E-04 | 1 | 0.0012 | 0 | NA | NA |
| NM_001177711 | RBMS3        | 0.415720127214902 | 0                   | 2.00E-04 | 1 | 0.0012 | 0 | NA | NA |
| NM_001003792 | RBMS3        | 0.415720127214902 | 0                   | 2.00E-04 | 1 | 0.0012 | 0 | NA | NA |
| NM_001003793 | RBMS3        | 0.415720127214902 | 0                   | 2.00E-04 | 1 | 0.0012 | 0 | NA | NA |
| NM_001270584 | IQCA1        | 0.415720127214902 | 0                   | 2.00E-04 | 1 | 0.0012 | 0 | NA | NA |
| NM_024726    | IQCA1        | 0.415720127214902 | 0                   | 2.00E-04 | 1 | 0.0012 | 0 | NA | NA |

|              |                 |                   |                   |          |   |        |   |    |    |
|--------------|-----------------|-------------------|-------------------|----------|---|--------|---|----|----|
| NR_073043    | <i>IQCA1</i>    | 0.415720127214902 | 0                 | 2.00E-04 | 1 | 0.0012 | 0 | NA | NA |
| NR_038371    | <i>FLJ45974</i> | 0.415720127214902 | 0                 | 2.00E-04 | 1 | 0.0012 | 0 | NA | NA |
| NM_058173    | <i>MUCL1</i>    | 0.414357110404362 | 0                 | 2.00E-04 | 1 | 0.0012 | 0 | NA | NA |
| NM_001005187 | <i>OR6T1</i>    | 0.413902771467515 | 0                 | 2.00E-04 | 1 | 0.0012 | 0 | NA | NA |
| NM_016049    | <i>EMC9</i>     | 0.413448432530668 | 0                 | 2.00E-04 | 1 | 0.0012 | 0 | NA | NA |
| NM_005495    | <i>SLC17A4</i>  | 0.412539754656974 | 0                 | 2.00E-04 | 1 | 0.0012 | 0 | NA | NA |
| NM_001160174 | <i>NAT1</i>     | 0.412539754656974 | 0                 | 2.00E-04 | 1 | 0.0012 | 0 | NA | NA |
| NM_001446    | <i>FABP7</i>    | 0.412085415720127 | 0                 | 2.00E-04 | 1 | 0.0012 | 0 | NA | NA |
| NM_030780    | <i>SLC25A32</i> | 0.41163107678328  | 0                 | 2.00E-04 | 1 | 0.0012 | 0 | NA | NA |
| NR_102337    | <i>SLC25A32</i> | 0.41163107678328  | 0                 | 2.00E-04 | 1 | 0.0012 | 0 | NA | NA |
| NR_102338    | <i>SLC25A32</i> | 0.41163107678328  | 0                 | 2.00E-04 | 1 | 0.0012 | 0 | NA | NA |
| NM_001198834 | <i>PDE4DIP</i>  | 0.410722398909587 | 0                 | 2.00E-04 | 1 | 0.0012 | 0 | NA | NA |
| NM_014644    | <i>PDE4DIP</i>  | 0.410722398909587 | 0                 | 2.00E-04 | 1 | 0.0012 | 0 | NA | NA |
| NM_001002812 | <i>PDE4DIP</i>  | 0.410722398909587 | 0                 | 2.00E-04 | 1 | 0.0012 | 0 | NA | NA |
| NM_001195261 | <i>PDE4DIP</i>  | 0.410722398909587 | 0                 | 2.00E-04 | 1 | 0.0012 | 0 | NA | NA |
| NM_001002810 | <i>PDE4DIP</i>  | 0.410722398909587 | 0                 | 2.00E-04 | 1 | 0.0012 | 0 | NA | NA |
| NM_001460    | <i>FMO2</i>     | 0.41026805997274  | 0                 | 2.00E-04 | 1 | 0.0012 | 0 | NA | NA |
| NR_102326    | <i>HCG18</i>    | 0.41026805997274  | 0                 | 2.00E-04 | 1 | 0.0012 | 0 | NA | NA |
| NR_102327    | <i>HCG18</i>    | 0.41026805997274  | 0                 | 2.00E-04 | 1 | 0.0012 | 0 | NA | NA |
| NR_024053    | <i>HCG18</i>    | 0.41026805997274  | 0                 | 2.00E-04 | 1 | 0.0012 | 0 | NA | NA |
| NR_024052    | <i>HCG18</i>    | 0.41026805997274  | 0                 | 2.00E-04 | 1 | 0.0012 | 0 | NA | NA |
| NM_001008226 | <i>FAM154B</i>  | 0.409359382099046 | 0                 | 2.00E-04 | 1 | 0.0012 | 0 | NA | NA |
| NM_017559    | <i>FNDC8</i>    | 0.408905043162199 | 0                 | 2.00E-04 | 1 | 0.0012 | 0 | NA | NA |
| NM_031914    | <i>SYT16</i>    | 0.407542026351658 | 0                 | 2.00E-04 | 1 | 0.0012 | 0 | NA | NA |
| NM_052971    | <i>LEAP2</i>    | 0.407542026351658 | 0                 | 2.00E-04 | 1 | 0.0012 | 0 | NA | NA |
| NM_016370    | <i>RAB9B</i>    | 0.407087687414811 | 0                 | 2.00E-04 | 1 | 0.0012 | 0 | NA | NA |
| NM_001080477 | <i>TENM3</i>    | 0.406179009541118 | 0                 | 2.00E-04 | 1 | 0.0012 | 0 | NA | NA |
| NM_001170553 | <i>VSIG1</i>    | 0.405270331667424 | 0                 | 2.00E-04 | 1 | 0.0012 | 0 | NA | NA |
| NM_182607    | <i>VSIG1</i>    | 0.405270331667424 | 0                 | 2.00E-04 | 1 | 0.0012 | 0 | NA | NA |
| NM_001004467 | <i>OR10J3</i>   | 0.405270331667424 | 0                 | 2.00E-04 | 1 | 0.0012 | 0 | NA | NA |
| NM_001105069 | <i>ACSM2B</i>   | 0.404815992730577 | 0                 | 2.00E-04 | 1 | 0.0012 | 0 | NA | NA |
| NM_182617    | <i>ACSM2B</i>   | 0.404815992730577 | 0                 | 2.00E-04 | 1 | 0.0012 | 0 | NA | NA |
| NM_182489    | <i>STRA8</i>    | 0.40436165379373  | 0                 | 2.00E-04 | 1 | 0.0012 | 0 | NA | NA |
| NM_002665    | <i>PLGLB2</i>   | 0.583825533848251 | 0.179463880054521 | 2.00E-04 | 1 | 0.0012 | 0 | NA | NA |
| NM_001032392 | <i>PLGLB1</i>   | 0.583825533848251 | 0.179463880054521 | 2.00E-04 | 1 | 0.0012 | 0 | NA | NA |
| NM_004288    | <i>CYTIP</i>    | 0.403452975920036 | 0                 | 2.00E-04 | 1 | 0.0012 | 0 | NA | NA |
| NM_005554    | <i>KRT6A</i>    | 0.402998636983189 | 0                 | 2.00E-04 | 1 | 0.0012 | 0 | NA | NA |
| NM_181486    | <i>TBX5</i>     | 0.496138119036801 | 0.093139482053612 | 2.00E-04 | 1 | 0.0012 | 0 | NA | NA |
| NM_003263    | <i>TLR1</i>     | 0.402544298046343 | 0                 | 2.00E-04 | 1 | 0.0012 | 0 | NA | NA |
| NM_001098538 | <i>PRR4</i>     | 0.402089959109496 | 0                 | 2.00E-04 | 1 | 0.0012 | 0 | NA | NA |
| NM_007244    | <i>PRR4</i>     | 0.402089959109496 | 0                 | 2.00E-04 | 1 | 0.0012 | 0 | NA | NA |

|              |            |                   |                     |          |   |        |   |    |    |
|--------------|------------|-------------------|---------------------|----------|---|--------|---|----|----|
| NM_007257    | PNMA2      | 0.402089959109496 | 0                   | 2.00E-04 | 1 | 0.0012 | 0 | NA | NA |
| NM_021777    | ADAM28     | 0.401635620172649 | 0                   | 2.00E-04 | 1 | 0.0012 | 0 | NA | NA |
| NM_014265    | ADAM28     | 0.401635620172649 | 0                   | 2.00E-04 | 1 | 0.0012 | 0 | NA | NA |
| NM_001682    | ATP2B1     | 0.401635620172649 | 0                   | 2.00E-04 | 1 | 0.0012 | 0 | NA | NA |
| NM_001001323 | ATP2B1     | 0.401635620172649 | 0                   | 2.00E-04 | 1 | 0.0012 | 0 | NA | NA |
| NM_002677    | PMP2       | 0.400726942298955 | 0                   | 2.00E-04 | 1 | 0.0012 | 0 | NA | NA |
| NM_001185149 | CLDN24     | 0.400272603362108 | 0                   | 2.00E-04 | 1 | 0.0012 | 0 | NA | NA |
| NM_001271944 | TFEB       | 0.400272603362108 | 0                   | 2.00E-04 | 1 | 0.0012 | 0 | NA | NA |
| NM_001271943 | TFEB       | 0.400272603362108 | 0                   | 2.00E-04 | 1 | 0.0012 | 0 | NA | NA |
| NM_007162    | TFEB       | 0.400272603362108 | 0                   | 2.00E-04 | 1 | 0.0012 | 0 | NA | NA |
| NM_152731    | BEND6      | 0.399818264425261 | 0                   | 2.00E-04 | 1 | 0.0012 | 0 | NA | NA |
| NM_001136239 | PRDM6      | 0.399363925488414 | 0                   | 2.00E-04 | 1 | 0.0012 | 0 | NA | NA |
| NM_175057    | TAAR9      | 0.398909586551567 | 0                   | 2.00E-04 | 1 | 0.0012 | 0 | NA | NA |
| NR_024398    | ZBED3-AS1  | 0.398455247614721 | 0                   | 2.00E-04 | 1 | 0.0012 | 0 | NA | NA |
| NM_001005325 | OR6M1      | 0.398000908677874 | 0                   | 2.00E-04 | 1 | 0.0012 | 0 | NA | NA |
| NM_139249    | MS4A6E     | 0.397546569741027 | 0                   | 2.00E-04 | 1 | 0.0012 | 0 | NA | NA |
| NM_001004752 | OR51F1     | 0.396637891867333 | 0                   | 2.00E-04 | 1 | 0.0012 | 0 | NA | NA |
| NM_194324    | TMSB15B    | 0.395729213993639 | 0                   | 2.00E-04 | 1 | 0.0012 | 0 | NA | NA |
| NM_001143989 | NBPF4      | 0.395729213993639 | 0                   | 2.00E-04 | 1 | 0.0012 | 0 | NA | NA |
| NM_001001964 | OR2T11     | 0.395729213993639 | 0                   | 2.00E-04 | 1 | 0.0012 | 0 | NA | NA |
| NM_004326    | BCL9       | 0.395274875056792 | 0                   | 2.00E-04 | 1 | 0.0012 | 0 | NA | NA |
| NM_001243722 | TP53TG3D   | 0.395274875056792 | 0                   | 2.00E-04 | 1 | 0.0012 | 0 | NA | NA |
| NM_000667    | ADH1A      | 0.395274875056792 | 0                   | 2.00E-04 | 1 | 0.0012 | 0 | NA | NA |
| NM_001199091 | TDRD5      | 0.394366197183099 | 0                   | 2.00E-04 | 1 | 0.0012 | 0 | NA | NA |
| NM_173533    | TDRD5      | 0.394366197183099 | 0                   | 2.00E-04 | 1 | 0.0012 | 0 | NA | NA |
| NM_001199085 | TDRD5      | 0.394366197183099 | 0                   | 2.00E-04 | 1 | 0.0012 | 0 | NA | NA |
| NM_001184695 | MEPE       | 0.394366197183099 | 0                   | 2.00E-04 | 1 | 0.0012 | 0 | NA | NA |
| NM_001184697 | MEPE       | 0.394366197183099 | 0                   | 2.00E-04 | 1 | 0.0012 | 0 | NA | NA |
| NM_001184696 | MEPE       | 0.394366197183099 | 0                   | 2.00E-04 | 1 | 0.0012 | 0 | NA | NA |
| NM_020203    | MEPE       | 0.394366197183099 | 0                   | 2.00E-04 | 1 | 0.0012 | 0 | NA | NA |
| NM_001077441 | BCLAF1     | 0.394366197183099 | 0                   | 2.00E-04 | 1 | 0.0012 | 0 | NA | NA |
| NM_001077440 | BCLAF1     | 0.394366197183099 | 0                   | 2.00E-04 | 1 | 0.0012 | 0 | NA | NA |
| NM_014739    | BCLAF1     | 0.394366197183099 | 0                   | 2.00E-04 | 1 | 0.0012 | 0 | NA | NA |
| NM_000785    | CYP27B1    | 0.403452975920036 | 0.00908677873693776 | 2.00E-04 | 1 | 0.0012 | 0 | NA | NA |
| NM_001105522 | TRIM49D2P  | 0.393911858246252 | 0                   | 2.00E-04 | 1 | 0.0012 | 0 | NA | NA |
| NR_045127    | RAET1E-AS1 | 0.393457519309405 | 0                   | 2.00E-04 | 1 | 0.0012 | 0 | NA | NA |
| NM_145111    | FAM200A    | 0.393457519309405 | 0                   | 2.00E-04 | 1 | 0.0012 | 0 | NA | NA |
| NR_024128    | OR3A4P     | 0.393003180372558 | 0                   | 2.00E-04 | 1 | 0.0012 | 0 | NA | NA |
| NM_001136131 | APP        | 0.392548841435711 | 0                   | 2.00E-04 | 1 | 0.0012 | 0 | NA | NA |
| NM_001136129 | APP        | 0.392548841435711 | 0                   | 2.00E-04 | 1 | 0.0012 | 0 | NA | NA |
| NM_001204301 | APP        | 0.392548841435711 | 0                   | 2.00E-04 | 1 | 0.0012 | 0 | NA | NA |

|              |         |                   |   |          |   |        |   |    |    |
|--------------|---------|-------------------|---|----------|---|--------|---|----|----|
| NM_001204303 | APP     | 0.392548841435711 | 0 | 2.00E-04 | 1 | 0.0012 | 0 | NA | NA |
| NM_000484    | APP     | 0.392548841435711 | 0 | 2.00E-04 | 1 | 0.0012 | 0 | NA | NA |
| NM_201414    | APP     | 0.392548841435711 | 0 | 2.00E-04 | 1 | 0.0012 | 0 | NA | NA |
| NM_001136130 | APP     | 0.392548841435711 | 0 | 2.00E-04 | 1 | 0.0012 | 0 | NA | NA |
| NM_001204302 | APP     | 0.392548841435711 | 0 | 2.00E-04 | 1 | 0.0012 | 0 | NA | NA |
| NM_201413    | APP     | 0.392548841435711 | 0 | 2.00E-04 | 1 | 0.0012 | 0 | NA | NA |
| NM_005664    | MKRN3   | 0.392094502498864 | 0 | 2.00E-04 | 1 | 0.0012 | 0 | NA | NA |
| NM_173506    | LYPD4   | 0.392094502498864 | 0 | 2.00E-04 | 1 | 0.0012 | 0 | NA | NA |
| NM_002241    | KCNJ10  | 0.391640163562017 | 0 | 2.00E-04 | 1 | 0.0012 | 0 | NA | NA |
| NM_052938    | FCRL1   | 0.390731485688323 | 0 | 2.00E-04 | 1 | 0.0012 | 0 | NA | NA |
| NM_001159398 | FCRL1   | 0.390731485688323 | 0 | 2.00E-04 | 1 | 0.0012 | 0 | NA | NA |
| NM_001159397 | FCRL1   | 0.390731485688323 | 0 | 2.00E-04 | 1 | 0.0012 | 0 | NA | NA |
| NM_001001961 | OR13C3  | 0.390731485688323 | 0 | 2.00E-04 | 1 | 0.0012 | 0 | NA | NA |
| NM_001083615 | MYO3B   | 0.390277146751477 | 0 | 2.00E-04 | 1 | 0.0012 | 0 | NA | NA |
| NM_138995    | MYO3B   | 0.390277146751477 | 0 | 2.00E-04 | 1 | 0.0012 | 0 | NA | NA |
| NR_045684    | MYO3B   | 0.390277146751477 | 0 | 2.00E-04 | 1 | 0.0012 | 0 | NA | NA |
| NR_045683    | MYO3B   | 0.390277146751477 | 0 | 2.00E-04 | 1 | 0.0012 | 0 | NA | NA |
| NR_045682    | MYO3B   | 0.390277146751477 | 0 | 2.00E-04 | 1 | 0.0012 | 0 | NA | NA |
| NM_001142538 | LGALS12 | 0.389368468877783 | 0 | 2.00E-04 | 1 | 0.0012 | 0 | NA | NA |
| NM_001142537 | LGALS12 | 0.389368468877783 | 0 | 2.00E-04 | 1 | 0.0012 | 0 | NA | NA |
| NM_018932    | PCDHB12 | 0.388459791004089 | 0 | 2.00E-04 | 1 | 0.0012 | 0 | NA | NA |
| NM_002427    | MMP13   | 0.388459791004089 | 0 | 2.00E-04 | 1 | 0.0012 | 0 | NA | NA |
| NM_016073    | HDGFRP3 | 0.388005452067242 | 0 | 2.00E-04 | 1 | 0.0012 | 0 | NA | NA |
| NM_032412    | CYSTM1  | 0.387096774193548 | 0 | 2.00E-04 | 1 | 0.0012 | 0 | NA | NA |
| NM_001128211 | NUDCD1  | 0.387096774193548 | 0 | 2.00E-04 | 1 | 0.0012 | 0 | NA | NA |
| NM_001284237 | ZFYVE16 | 0.386642435256701 | 0 | 2.00E-04 | 1 | 0.0012 | 0 | NA | NA |
| NM_001105251 | ZFYVE16 | 0.386642435256701 | 0 | 2.00E-04 | 1 | 0.0012 | 0 | NA | NA |
| NM_001284236 | ZFYVE16 | 0.386642435256701 | 0 | 2.00E-04 | 1 | 0.0012 | 0 | NA | NA |
| NM_014733    | ZFYVE16 | 0.386642435256701 | 0 | 2.00E-04 | 1 | 0.0012 | 0 | NA | NA |
| NM_001242648 | PHACTR1 | 0.386642435256701 | 0 | 2.00E-04 | 1 | 0.0012 | 0 | NA | NA |
| NM_030948    | PHACTR1 | 0.386642435256701 | 0 | 2.00E-04 | 1 | 0.0012 | 0 | NA | NA |
| NM_004179    | TPH1    | 0.386642435256701 | 0 | 2.00E-04 | 1 | 0.0012 | 0 | NA | NA |
| NR_073396    | ZNF818P | 0.386188096319855 | 0 | 2.00E-04 | 1 | 0.0012 | 0 | NA | NA |
| NM_078629    | MSL3    | 0.386188096319855 | 0 | 2.00E-04 | 1 | 0.0012 | 0 | NA | NA |
| NM_078628    | MSL3    | 0.386188096319855 | 0 | 2.00E-04 | 1 | 0.0012 | 0 | NA | NA |
| NM_001282174 | MSL3    | 0.386188096319855 | 0 | 2.00E-04 | 1 | 0.0012 | 0 | NA | NA |
| NR_034154    | COLCA1  | 0.385279418446161 | 0 | 2.00E-04 | 1 | 0.0012 | 0 | NA | NA |
| NM_005164    | ABCD2   | 0.385279418446161 | 0 | 2.00E-04 | 1 | 0.0012 | 0 | NA | NA |
| NM_004106    | FCER1G  | 0.384825079509314 | 0 | 2.00E-04 | 1 | 0.0012 | 0 | NA | NA |
| NM_001001916 | OR52J3  | 0.384370740572467 | 0 | 2.00E-04 | 1 | 0.0012 | 0 | NA | NA |
| NM_001004461 | OR10A6  | 0.384370740572467 | 0 | 2.00E-04 | 1 | 0.0012 | 0 | NA | NA |

|              |                  |                   |                    |          |   |        |   |    |    |
|--------------|------------------|-------------------|--------------------|----------|---|--------|---|----|----|
| NM_001252195 | <i>C9orf24</i>   | 0.384370740572467 | 0                  | 2.00E-04 | 1 | 0.0012 | 0 | NA | NA |
| NM_147169    | <i>C9orf24</i>   | 0.384370740572467 | 0                  | 2.00E-04 | 1 | 0.0012 | 0 | NA | NA |
| NM_147168    | <i>C9orf24</i>   | 0.384370740572467 | 0                  | 2.00E-04 | 1 | 0.0012 | 0 | NA | NA |
| NM_007184    | <i>NISCH</i>     | 0.38391640163562  | 0                  | 2.00E-04 | 1 | 0.0012 | 0 | NA | NA |
| NM_001276294 | <i>NISCH</i>     | 0.38391640163562  | 0                  | 2.00E-04 | 1 | 0.0012 | 0 | NA | NA |
| NM_001276293 | <i>NISCH</i>     | 0.38391640163562  | 0                  | 2.00E-04 | 1 | 0.0012 | 0 | NA | NA |
| NM_001145287 | <i>OPRM1</i>     | 0.38391640163562  | 0                  | 2.00E-04 | 1 | 0.0012 | 0 | NA | NA |
| NM_004045    | <i>ATOX1</i>     | 0.383462062698773 | 0                  | 2.00E-04 | 1 | 0.0012 | 0 | NA | NA |
| NM_001127454 | <i>DFNA5</i>     | 0.383007723761926 | 0                  | 2.00E-04 | 1 | 0.0012 | 0 | NA | NA |
| NM_004403    | <i>DFNA5</i>     | 0.383007723761926 | 0                  | 2.00E-04 | 1 | 0.0012 | 0 | NA | NA |
| NM_001004702 | <i>OR4C3</i>     | 0.38255338482508  | 0                  | 2.00E-04 | 1 | 0.0012 | 0 | NA | NA |
| NM_001002035 | <i>DEFB108B</i>  | 0.38255338482508  | 0                  | 2.00E-04 | 1 | 0.0012 | 0 | NA | NA |
| NM_001137608 | <i>ZNF732</i>    | 0.38255338482508  | 0                  | 2.00E-04 | 1 | 0.0012 | 0 | NA | NA |
| NM_174858    | <i>AK5</i>       | 0.382099045888233 | 0                  | 2.00E-04 | 1 | 0.0012 | 0 | NA | NA |
| NM_203436    | <i>ASCL4</i>     | 0.382099045888233 | 0                  | 2.00E-04 | 1 | 0.0012 | 0 | NA | NA |
| NM_003006    | <i>SELPLG</i>    | 0.382099045888233 | 0                  | 2.00E-04 | 1 | 0.0012 | 0 | NA | NA |
| NR_024359    | <i>LINC00086</i> | 0.381644706951386 | 0                  | 2.00E-04 | 1 | 0.0012 | 0 | NA | NA |
| NM_001173484 | <i>NEBL</i>      | 0.381644706951386 | 0                  | 2.00E-04 | 1 | 0.0012 | 0 | NA | NA |
| NM_213569    | <i>NEBL</i>      | 0.381644706951386 | 0                  | 2.00E-04 | 1 | 0.0012 | 0 | NA | NA |
| NM_001115131 | <i>C6</i>        | 0.381644706951386 | 0                  | 2.00E-04 | 1 | 0.0012 | 0 | NA | NA |
| NM_005441    | <i>CHAF1B</i>    | 0.381190368014539 | 0                  | 2.00E-04 | 1 | 0.0012 | 0 | NA | NA |
| NM_006175    | <i>NRAP</i>      | 0.381190368014539 | 0                  | 2.00E-04 | 1 | 0.0012 | 0 | NA | NA |
| NM_198060    | <i>NRAP</i>      | 0.381190368014539 | 0                  | 2.00E-04 | 1 | 0.0012 | 0 | NA | NA |
| NM_001261463 | <i>NRAP</i>      | 0.381190368014539 | 0                  | 2.00E-04 | 1 | 0.0012 | 0 | NA | NA |
| NM_001099283 | <i>ZNF239</i>    | 0.380736029077692 | 0                  | 2.00E-04 | 1 | 0.0012 | 0 | NA | NA |
| NM_001099282 | <i>ZNF239</i>    | 0.380736029077692 | 0                  | 2.00E-04 | 1 | 0.0012 | 0 | NA | NA |
| NM_001099284 | <i>ZNF239</i>    | 0.380736029077692 | 0                  | 2.00E-04 | 1 | 0.0012 | 0 | NA | NA |
| NR_002714    | <i>REG1P</i>     | 0.380281690140845 | 0                  | 2.00E-04 | 1 | 0.0012 | 0 | NA | NA |
| NM_002100    | <i>GYPB</i>      | 0.379827351203998 | 0                  | 2.00E-04 | 1 | 0.0012 | 0 | NA | NA |
| NM_001146181 | <i>LOC649330</i> | 0.379373012267151 | 0                  | 2.00E-04 | 1 | 0.0012 | 0 | NA | NA |
| NM_001267614 | <i>GPR161</i>    | 0.379373012267151 | 0                  | 2.00E-04 | 1 | 0.0012 | 0 | NA | NA |
| NM_001267611 | <i>GPR161</i>    | 0.379373012267151 | 0                  | 2.00E-04 | 1 | 0.0012 | 0 | NA | NA |
| NM_001267610 | <i>GPR161</i>    | 0.379373012267151 | 0                  | 2.00E-04 | 1 | 0.0012 | 0 | NA | NA |
| NM_001267609 | <i>GPR161</i>    | 0.379373012267151 | 0                  | 2.00E-04 | 1 | 0.0012 | 0 | NA | NA |
| NM_000870    | <i>HTR4</i>      | 0.415265788278055 | 0.0358927760109041 | 2.00E-04 | 1 | 0.0012 | 0 | NA | NA |
| NM_001040448 | <i>DEFB131</i>   | 0.378918673330304 | 0                  | 2.00E-04 | 1 | 0.0012 | 0 | NA | NA |
| NM_002591    | <i>PCK1</i>      | 0.378464334393458 | 0                  | 2.00E-04 | 1 | 0.0012 | 0 | NA | NA |
| NM_016162    | <i>ING4</i>      | 0.378464334393458 | 0                  | 2.00E-04 | 1 | 0.0012 | 0 | NA | NA |
| NM_001127585 | <i>ING4</i>      | 0.378464334393458 | 0                  | 2.00E-04 | 1 | 0.0012 | 0 | NA | NA |
| NM_001127584 | <i>ING4</i>      | 0.378464334393458 | 0                  | 2.00E-04 | 1 | 0.0012 | 0 | NA | NA |
| NM_001127583 | <i>ING4</i>      | 0.378464334393458 | 0                  | 2.00E-04 | 1 | 0.0012 | 0 | NA | NA |



|              |         |                   |                  |          |   |        |   |    |    |
|--------------|---------|-------------------|------------------|----------|---|--------|---|----|----|
| NM_001127586 | ING4    | 0.378464334393458 | 0                | 2.00E-04 | 1 | 0.0012 | 0 | NA | NA |
| NM_001127582 | ING4    | 0.378464334393458 | 0                | 2.00E-04 | 1 | 0.0012 | 0 | NA | NA |
| NM_001162916 | TYW3    | 0.378009995456611 | 0                | 2.00E-04 | 1 | 0.0012 | 0 | NA | NA |
| NR_038321    | OR51B5  | 0.378009995456611 | 0                | 2.00E-04 | 1 | 0.0012 | 0 | NA | NA |
| NM_001005567 | OR51B5  | 0.378009995456611 | 0                | 2.00E-04 | 1 | 0.0012 | 0 | NA | NA |
| NM_207305    | FOXD4   | 0.378009995456611 | 0                | 2.00E-04 | 1 | 0.0012 | 0 | NA | NA |
| NM_005521    | TLX1    | 0.377101317582917 | 0                | 2.00E-04 | 1 | 0.0012 | 0 | NA | NA |
| NM_001195517 | TLX1    | 0.377101317582917 | 0                | 2.00E-04 | 1 | 0.0012 | 0 | NA | NA |
| NM_001204067 | ANKS1B  | 0.37664697864607  | 0                | 2.00E-04 | 1 | 0.0012 | 0 | NA | NA |
| NM_001754    | RUNX1   | 0.37664697864607  | 0                | 2.00E-04 | 1 | 0.0012 | 0 | NA | NA |
| NM_139202    | MLC1    | 0.37664697864607  | 0                | 2.00E-04 | 1 | 0.0012 | 0 | NA | NA |
| NM_138467    | TYW3    | 0.376192639709223 | 0                | 2.00E-04 | 1 | 0.0012 | 0 | NA | NA |
| NM_001206955 | CNTN4   | 0.375283961835529 | 0                | 2.00E-04 | 1 | 0.0012 | 0 | NA | NA |
| NM_175884    | CCDC71L | 0.375283961835529 | 0                | 2.00E-04 | 1 | 0.0012 | 0 | NA | NA |
| NM_024569    | MPZL1   | 0.374829622898682 | 0                | 2.00E-04 | 1 | 0.0012 | 0 | NA | NA |
| NM_003953    | MPZL1   | 0.374829622898682 | 0                | 2.00E-04 | 1 | 0.0012 | 0 | NA | NA |
| NM_001146191 | MPZL1   | 0.374829622898682 | 0                | 2.00E-04 | 1 | 0.0012 | 0 | NA | NA |
| NM_004570    | PIK3C2G | 0.374829622898682 | 0                | 2.00E-04 | 1 | 0.0012 | 0 | NA | NA |
| NM_014879    | P2RY14  | 0.374375283961836 | 0                | 2.00E-04 | 1 | 0.0012 | 0 | NA | NA |
| NM_001102386 | GNAT3   | 0.374375283961836 | 0                | 2.00E-04 | 1 | 0.0012 | 0 | NA | NA |
| NM_178844    | NLRC3   | 0.373920945024989 | 0                | 2.00E-04 | 1 | 0.0012 | 0 | NA | NA |
| NR_075083    | NLRC3   | 0.373920945024989 | 0                | 2.00E-04 | 1 | 0.0012 | 0 | NA | NA |
| NM_004502    | HOXB7   | 0.373466606088142 | 0                | 2.00E-04 | 1 | 0.0012 | 0 | NA | NA |
| NM_001721    | BMX     | 0.373012267151295 | 0                | 2.00E-04 | 1 | 0.0012 | 0 | NA | NA |
| NM_001271900 | PPP2R2B | 0.373012267151295 | 0                | 2.00E-04 | 1 | 0.0012 | 0 | NA | NA |
| NM_181678    | PPP2R2B | 0.373012267151295 | 0                | 2.00E-04 | 1 | 0.0012 | 0 | NA | NA |
| NM_181677    | PPP2R2B | 0.373012267151295 | 0                | 2.00E-04 | 1 | 0.0012 | 0 | NA | NA |
| NM_001271899 | PPP2R2B | 0.373012267151295 | 0                | 2.00E-04 | 1 | 0.0012 | 0 | NA | NA |
| NM_198514    | NHLRC2  | 0.372557928214448 | 0                | 2.00E-04 | 1 | 0.0012 | 0 | NA | NA |
| NM_031413    | CECR2   | 0.372557928214448 | 0                | 2.00E-04 | 1 | 0.0012 | 0 | NA | NA |
| NM_001195260 | PDE4DIP | 0.502498864152658 | 0.12994093593821 | 2.00E-04 | 1 | 0.0012 | 0 | NA | NA |
| NM_001073    | UGT2B11 | 0.372557928214448 | 0                | 2.00E-04 | 1 | 0.0012 | 0 | NA | NA |
| NM_178335    | CCDC50  | 0.372103589277601 | 0                | 2.00E-04 | 1 | 0.0012 | 0 | NA | NA |
| NM_174908    | CCDC50  | 0.372103589277601 | 0                | 2.00E-04 | 1 | 0.0012 | 0 | NA | NA |
| NM_005963    | MYH1    | 0.371649250340754 | 0                | 2.00E-04 | 1 | 0.0012 | 0 | NA | NA |
| NM_015431    | TRIM58  | 0.371194911403907 | 0                | 2.00E-04 | 1 | 0.0012 | 0 | NA | NA |
| NM_013989    | DIO2    | 0.371194911403907 | 0                | 2.00E-04 | 1 | 0.0012 | 0 | NA | NA |
| NR_030295    | MIR569  | 0.37074057246706  | 0                | 2.00E-04 | 1 | 0.0012 | 0 | NA | NA |
| NM_006735    | HOXA2   | 0.370286233530214 | 0                | 2.00E-04 | 1 | 0.0012 | 0 | NA | NA |
| NM_001130025 | FAM115C | 0.369831894593367 | 0                | 2.00E-04 | 1 | 0.0012 | 0 | NA | NA |
| NM_198566    | C5orf34 | 0.369831894593367 | 0                | 2.00E-04 | 1 | 0.0012 | 0 | NA | NA |

|              |         |                   |                    |          |   |        |   |    |    |
|--------------|---------|-------------------|--------------------|----------|---|--------|---|----|----|
| NM_000724    | CACNB2  | 0.368923216719673 | 0                  | 2.00E-04 | 1 | 0.0012 | 0 | NA | NA |
| NM_001184692 | NPNT    | 0.368923216719673 | 0                  | 2.00E-04 | 1 | 0.0012 | 0 | NA | NA |
| NM_001184693 | NPNT    | 0.368923216719673 | 0                  | 2.00E-04 | 1 | 0.0012 | 0 | NA | NA |
| NM_001184691 | NPNT    | 0.368923216719673 | 0                  | 2.00E-04 | 1 | 0.0012 | 0 | NA | NA |
| NM_001184690 | NPNT    | 0.368923216719673 | 0                  | 2.00E-04 | 1 | 0.0012 | 0 | NA | NA |
| NM_001033047 | NPNT    | 0.368923216719673 | 0                  | 2.00E-04 | 1 | 0.0012 | 0 | NA | NA |
| NM_001004490 | OR2AG2  | 0.368468877782826 | 0                  | 2.00E-04 | 1 | 0.0012 | 0 | NA | NA |
| NM_001639    | APCS    | 0.368014538845979 | 0                  | 2.00E-04 | 1 | 0.0012 | 0 | NA | NA |
| NM_144596    | TTC8    | 0.367560199909132 | 0                  | 2.00E-04 | 1 | 0.0012 | 0 | NA | NA |
| NM_198309    | TTC8    | 0.367560199909132 | 0                  | 2.00E-04 | 1 | 0.0012 | 0 | NA | NA |
| NM_198310    | TTC8    | 0.367560199909132 | 0                  | 2.00E-04 | 1 | 0.0012 | 0 | NA | NA |
| NM_001178142 | TFDP2   | 0.412085415720127 | 0.0449795547478419 | 2.00E-04 | 1 | 0.0012 | 0 | NA | NA |
| NM_001178141 | TFDP2   | 0.412085415720127 | 0.0449795547478419 | 2.00E-04 | 1 | 0.0012 | 0 | NA | NA |
| NM_006286    | TFDP2   | 0.412085415720127 | 0.0449795547478419 | 2.00E-04 | 1 | 0.0012 | 0 | NA | NA |
| NM_016396    | CTDSPL2 | 0.367105860972285 | 0                  | 2.00E-04 | 1 | 0.0012 | 0 | NA | NA |
| NM_024506    | GLB1L   | 0.367105860972285 | 0                  | 2.00E-04 | 1 | 0.0012 | 0 | NA | NA |
| NR_030228    | MIR503  | 0.367105860972285 | 0                  | 2.00E-04 | 1 | 0.0012 | 0 | NA | NA |
| NM_006408    | AGR2    | 0.366651522035438 | 0                  | 2.00E-04 | 1 | 0.0012 | 0 | NA | NA |
| NR_027962    | TYW3    | 0.366197183098592 | 0                  | 2.00E-04 | 1 | 0.0012 | 0 | NA | NA |
| NM_005863    | NET1    | 0.366197183098592 | 0                  | 2.00E-04 | 1 | 0.0012 | 0 | NA | NA |
| NR_073040    | NET1    | 0.366197183098592 | 0                  | 2.00E-04 | 1 | 0.0012 | 0 | NA | NA |
| NM_001174130 | SLC11A2 | 0.366197183098592 | 0                  | 2.00E-04 | 1 | 0.0012 | 0 | NA | NA |
| NM_001005279 | OR6K2   | 0.365742844161745 | 0                  | 2.00E-04 | 1 | 0.0012 | 0 | NA | NA |
| NM_138318    | KCNK10  | 0.365742844161745 | 0                  | 2.00E-04 | 1 | 0.0012 | 0 | NA | NA |
| NM_004904    | CREB5   | 0.365288505224898 | 0                  | 2.00E-04 | 1 | 0.0012 | 0 | NA | NA |
| NM_152453    | TMCO5A  | 0.364834166288051 | 0                  | 2.00E-04 | 1 | 0.0012 | 0 | NA | NA |
| NM_001278426 | LILRB4  | 0.364834166288051 | 0                  | 2.00E-04 | 1 | 0.0012 | 0 | NA | NA |
| NM_001278427 | LILRB4  | 0.364834166288051 | 0                  | 2.00E-04 | 1 | 0.0012 | 0 | NA | NA |
| NM_001278429 | LILRB4  | 0.364834166288051 | 0                  | 2.00E-04 | 1 | 0.0012 | 0 | NA | NA |
| NM_001278430 | LILRB4  | 0.364834166288051 | 0                  | 2.00E-04 | 1 | 0.0012 | 0 | NA | NA |
| NM_001278428 | LILRB4  | 0.364834166288051 | 0                  | 2.00E-04 | 1 | 0.0012 | 0 | NA | NA |
| NM_001256570 | RXRG    | 0.364834166288051 | 0                  | 2.00E-04 | 1 | 0.0012 | 0 | NA | NA |
| NM_006917    | RXRG    | 0.364834166288051 | 0                  | 2.00E-04 | 1 | 0.0012 | 0 | NA | NA |
| NR_033824    | RXRG    | 0.364834166288051 | 0                  | 2.00E-04 | 1 | 0.0012 | 0 | NA | NA |
| NM_005142    | GIF     | 0.364379827351204 | 0                  | 2.00E-04 | 1 | 0.0012 | 0 | NA | NA |
| NM_033183    | CGB8    | 0.364379827351204 | 0                  | 2.00E-04 | 1 | 0.0012 | 0 | NA | NA |
| NM_014585    | SLC40A1 | 0.363925488414357 | 0                  | 2.00E-04 | 1 | 0.0012 | 0 | NA | NA |
| NM_001206480 | ELMO1   | 0.39118582462517  | 0.0272603362108133 | 2.00E-04 | 1 | 0.0012 | 0 | NA | NA |
| NM_007122    | USF1    | 0.36347114947751  | 0                  | 2.00E-04 | 1 | 0.0012 | 0 | NA | NA |
| NM_207005    | USF1    | 0.36347114947751  | 0                  | 2.00E-04 | 1 | 0.0012 | 0 | NA | NA |
| NM_000433    | NCF2    | 0.36347114947751  | 0                  | 2.00E-04 | 1 | 0.0012 | 0 | NA | NA |

|              |                 |                   |                    |          |   |        |   |    |    |
|--------------|-----------------|-------------------|--------------------|----------|---|--------|---|----|----|
| NM_001190789 | <i>NCF2</i>     | 0.36347114947751  | 0                  | 2.00E-04 | 1 | 0.0012 | 0 | NA | NA |
| NM_001190794 | <i>NCF2</i>     | 0.36347114947751  | 0                  | 2.00E-04 | 1 | 0.0012 | 0 | NA | NA |
| NM_014464    | <i>TINAG</i>    | 0.363016810540663 | 0                  | 2.00E-04 | 1 | 0.0012 | 0 | NA | NA |
| NM_001017923 | <i>C14orf28</i> | 0.362562471603816 | 0                  | 2.00E-04 | 1 | 0.0012 | 0 | NA | NA |
| NM_013308    | <i>GPR171</i>   | 0.362562471603816 | 0                  | 2.00E-04 | 1 | 0.0012 | 0 | NA | NA |
| NM_001204399 | <i>PITX2</i>    | 0.36210813266697  | 0                  | 2.00E-04 | 1 | 0.0012 | 0 | NA | NA |
| NM_001204398 | <i>PITX2</i>    | 0.36210813266697  | 0                  | 2.00E-04 | 1 | 0.0012 | 0 | NA | NA |
| NM_001204397 | <i>PITX2</i>    | 0.36210813266697  | 0                  | 2.00E-04 | 1 | 0.0012 | 0 | NA | NA |
| NM_153426    | <i>PITX2</i>    | 0.36210813266697  | 0                  | 2.00E-04 | 1 | 0.0012 | 0 | NA | NA |
| NM_153427    | <i>PITX2</i>    | 0.36210813266697  | 0                  | 2.00E-04 | 1 | 0.0012 | 0 | NA | NA |
| NM_033191    | <i>KRTAP9-4</i> | 0.361653793730123 | 0                  | 2.00E-04 | 1 | 0.0012 | 0 | NA | NA |
| NM_001037333 | <i>CYFIP2</i>   | 0.361199454793276 | 0                  | 2.00E-04 | 1 | 0.0012 | 0 | NA | NA |
| NM_001005161 | <i>OR52B4</i>   | 0.360745115856429 | 0                  | 2.00E-04 | 1 | 0.0012 | 0 | NA | NA |
| NM_176884    | <i>TAS2R43</i>  | 0.360745115856429 | 0                  | 2.00E-04 | 1 | 0.0012 | 0 | NA | NA |
| NM_006507    | <i>REG1B</i>    | 0.360745115856429 | 0                  | 2.00E-04 | 1 | 0.0012 | 0 | NA | NA |
| NM_173525    | <i>C11orf42</i> | 0.359836437982735 | 0                  | 2.00E-04 | 1 | 0.0012 | 0 | NA | NA |
| NM_138775    | <i>ALKBH8</i>   | 0.359836437982735 | 0                  | 2.00E-04 | 1 | 0.0012 | 0 | NA | NA |
| NM_006514    | <i>SCN10A</i>   | 0.359836437982735 | 0                  | 2.00E-04 | 1 | 0.0012 | 0 | NA | NA |
| NM_016945    | <i>TAS2R16</i>  | 0.359836437982735 | 0                  | 2.00E-04 | 1 | 0.0012 | 0 | NA | NA |
| NM_033058    | <i>TRIM55</i>   | 0.393911858246252 | 0.0345297592003635 | 2.00E-04 | 1 | 0.0012 | 0 | NA | NA |
| NM_184087    | <i>TRIM55</i>   | 0.393911858246252 | 0.0345297592003635 | 2.00E-04 | 1 | 0.0012 | 0 | NA | NA |
| NM_184086    | <i>TRIM55</i>   | 0.393911858246252 | 0.0345297592003635 | 2.00E-04 | 1 | 0.0012 | 0 | NA | NA |
| NM_184085    | <i>TRIM55</i>   | 0.393911858246252 | 0.0345297592003635 | 2.00E-04 | 1 | 0.0012 | 0 | NA | NA |
| NM_001004485 | <i>OR13F1</i>   | 0.359382099045888 | 0                  | 2.00E-04 | 1 | 0.0012 | 0 | NA | NA |
| NM_001145862 | <i>MTMR11</i>   | 0.358927760109041 | 0                  | 2.00E-04 | 1 | 0.0012 | 0 | NA | NA |
| NM_002704    | <i>PPBP</i>     | 0.358473421172194 | 0                  | 2.00E-04 | 1 | 0.0012 | 0 | NA | NA |
| NM_005622    | <i>ACSM3</i>    | 0.358019082235348 | 0                  | 2.00E-04 | 1 | 0.0012 | 0 | NA | NA |
| NM_202000    | <i>ACSM3</i>    | 0.358019082235348 | 0                  | 2.00E-04 | 1 | 0.0012 | 0 | NA | NA |
| NM_000463    | <i>UGT1A1</i>   | 0.358019082235348 | 0                  | 2.00E-04 | 1 | 0.0012 | 0 | NA | NA |
| NM_001005236 | <i>OR1L1</i>    | 0.358019082235348 | 0                  | 2.00E-04 | 1 | 0.0012 | 0 | NA | NA |
| NM_201591    | <i>GPM6A</i>    | 0.358019082235348 | 0                  | 2.00E-04 | 1 | 0.0012 | 0 | NA | NA |
| NM_014924    | <i>ATG14</i>    | 0.369831894593367 | 0.0118128123580191 | 2.00E-04 | 1 | 0.0012 | 0 | NA | NA |
| NR_026716    | <i>KIR3DX1</i>  | 0.357564743298501 | 0                  | 2.00E-04 | 1 | 0.0012 | 0 | NA | NA |
| NR_104095    | <i>KIR3DX1</i>  | 0.357564743298501 | 0                  | 2.00E-04 | 1 | 0.0012 | 0 | NA | NA |
| NR_104096    | <i>KIR3DX1</i>  | 0.357564743298501 | 0                  | 2.00E-04 | 1 | 0.0012 | 0 | NA | NA |
| NR_104097    | <i>KIR3DX1</i>  | 0.357564743298501 | 0                  | 2.00E-04 | 1 | 0.0012 | 0 | NA | NA |
| NM_001207024 | <i>M6PR</i>     | 0.357110404361654 | 0                  | 2.00E-04 | 1 | 0.0012 | 0 | NA | NA |
| NM_002355    | <i>M6PR</i>     | 0.357110404361654 | 0                  | 2.00E-04 | 1 | 0.0012 | 0 | NA | NA |
| NM_001004705 | <i>OR4D10</i>   | 0.368923216719673 | 0.0118128123580191 | 2.00E-04 | 1 | 0.0012 | 0 | NA | NA |
| NM_001258452 | <i>FBXO18</i>   | 0.35620172648796  | 0                  | 2.00E-04 | 1 | 0.0012 | 0 | NA | NA |
| NM_003221    | <i>TFAP2B</i>   | 0.35620172648796  | 0                  | 2.00E-04 | 1 | 0.0012 | 0 | NA | NA |

|              |              |                   |                     |          |   |        |   |    |        |
|--------------|--------------|-------------------|---------------------|----------|---|--------|---|----|--------|
| NM_001080508 | TBX18        | 0.35620172648796  | 0                   | 2.00E-04 | 1 | 0.0012 | 0 | NA | NA     |
| NM_006901    | MYO9A        | 0.355747387551113 | 0                   | 2.00E-04 | 1 | 0.0012 | 0 | NA | NA     |
| NM_001135699 | YWHAZ        | 0.355747387551113 | 0                   | 2.00E-04 | 1 | 0.0012 | 0 | NA | NA     |
| NM_024599    | RHBDF2       | 0.354838709677419 | 0                   | 2.00E-04 | 1 | 0.0012 | 0 | NA | NA     |
| NM_001007531 | NKAPL        | 0.354384370740572 | 0                   | 2.00E-04 | 1 | 0.0012 | 0 | NA | NA     |
| NM_001005495 | OR2T3        | 0.353930031803726 | 0                   | 2.00E-04 | 1 | 0.0012 | 0 | NA | NA     |
| NM_000737    | CGB          | 0.353930031803726 | 0                   | 2.00E-04 | 1 | 0.0012 | 0 | NA | NA     |
| NM_006748    | SLA          | 0.353930031803726 | 0                   | 2.00E-04 | 1 | 0.0012 | 0 | NA | NA     |
| NM_152570    | LINGO2       | 0.353930031803726 | 0                   | 2.00E-04 | 1 | 0.0012 | 0 | NA | NA     |
| NM_000220    | KCNJ1        | 0.568378009995457 | 0.214447978191731   | 2.00E-04 | 1 | 0.0012 | 0 | 1  | 0.0682 |
| NM_001004723 | OR4N2        | 0.468877782825988 | 0.114947751022263   | 2.00E-04 | 1 | 0.0012 | 0 | NA | NA     |
| NM_175064    | SPDYE1       | 0.353475692866879 | 0                   | 2.00E-04 | 1 | 0.0012 | 0 | NA | NA     |
| NM_001109754 | PTPRB        | 0.353475692866879 | 0                   | 2.00E-04 | 1 | 0.0012 | 0 | NA | NA     |
| NM_005123    | NR1H4        | 0.353021353930032 | 0                   | 2.00E-04 | 1 | 0.0012 | 0 | NA | NA     |
| NM_001206978 | NR1H4        | 0.353021353930032 | 0                   | 2.00E-04 | 1 | 0.0012 | 0 | NA | NA     |
| NM_001206977 | NR1H4        | 0.353021353930032 | 0                   | 2.00E-04 | 1 | 0.0012 | 0 | NA | NA     |
| NM_001206979 | NR1H4        | 0.353021353930032 | 0                   | 2.00E-04 | 1 | 0.0012 | 0 | NA | NA     |
| NM_020870    | SH3RF1       | 0.353021353930032 | 0                   | 2.00E-04 | 1 | 0.0012 | 0 | NA | NA     |
| NM_001198541 | ERAP1        | 0.359836437982735 | 0.00681508405270332 | 2.00E-04 | 1 | 0.0012 | 0 | NA | NA     |
| NM_001163677 | KCNMB3       | 0.352567014993185 | 0                   | 2.00E-04 | 1 | 0.0012 | 0 | NA | NA     |
| NM_171828    | KCNMB3       | 0.352567014993185 | 0                   | 2.00E-04 | 1 | 0.0012 | 0 | NA | NA     |
| NM_001001919 | OR13C4       | 0.352567014993185 | 0                   | 2.00E-04 | 1 | 0.0012 | 0 | NA | NA     |
| NM_015641    | TES          | 0.504770558836892 | 0.152657882780554   | 2.00E-04 | 1 | 0.0012 | 0 | NA | NA     |
| NM_001278505 | GPATCH11     | 0.482507950931395 | 0.130849613811904   | 2.00E-04 | 1 | 0.0012 | 0 | NA | NA     |
| NM_174931    | GPATCH11     | 0.482507950931395 | 0.130849613811904   | 2.00E-04 | 1 | 0.0012 | 0 | NA | NA     |
| NM_001243429 | ERG          | 0.351658337119491 | 0                   | 2.00E-04 | 1 | 0.0012 | 0 | NA | NA     |
| NM_001005202 | OR8K3        | 0.498864152657883 | 0.147660154475239   | 2.00E-04 | 1 | 0.0012 | 0 | NA | NA     |
| NM_001004473 | OR10K1       | 0.350749659245797 | 0                   | 2.00E-04 | 1 | 0.0012 | 0 | NA | NA     |
| NM_001243723 | SETMAR       | 0.350749659245797 | 0                   | 2.00E-04 | 1 | 0.0012 | 0 | NA | NA     |
| NM_006515    | SETMAR       | 0.350749659245797 | 0                   | 2.00E-04 | 1 | 0.0012 | 0 | NA | NA     |
| NM_001276325 | SETMAR       | 0.350749659245797 | 0                   | 2.00E-04 | 1 | 0.0012 | 0 | NA | NA     |
| NR_075073    | SETMAR       | 0.350749659245797 | 0                   | 2.00E-04 | 1 | 0.0012 | 0 | NA | NA     |
| NM_052867    | NALCN        | 0.350749659245797 | 0                   | 2.00E-04 | 1 | 0.0012 | 0 | NA | NA     |
| NR_002601    | FMO6P        | 0.35029532030895  | 0                   | 2.00E-04 | 1 | 0.0012 | 0 | NA | NA     |
| NM_033122    | CABS1        | 0.35029532030895  | 0                   | 2.00E-04 | 1 | 0.0012 | 0 | NA | NA     |
| NM_001127641 | LAMB3        | 0.35029532030895  | 0                   | 2.00E-04 | 1 | 0.0012 | 0 | NA | NA     |
| NR_034036    | LOC100130452 | 0.35029532030895  | 0                   | 2.00E-04 | 1 | 0.0012 | 0 | NA | NA     |
| NM_001167827 | TFEB         | 0.349840981372104 | 0                   | 2.00E-04 | 1 | 0.0012 | 0 | NA | NA     |
| NM_020133    | AGPAT4       | 0.453430258973194 | 0.10358927760109    | 2.00E-04 | 1 | 0.0012 | 0 | NA | NA     |
| NM_014865    | NCAPD2       | 0.349386642435257 | 0                   | 2.00E-04 | 1 | 0.0012 | 0 | NA | NA     |
| NM_002935    | RNASE3       | 0.349386642435257 | 0                   | 2.00E-04 | 1 | 0.0012 | 0 | NA | NA     |

|              |                 |                   |                    |          |   |        |   |    |    |
|--------------|-----------------|-------------------|--------------------|----------|---|--------|---|----|----|
| NM_000228    | LAMB3           | 0.349386642435257 | 0                  | 2.00E-04 | 1 | 0.0012 | 0 | NA | NA |
| NM_022569    | NDST4           | 0.34893230349841  | 0                  | 2.00E-04 | 1 | 0.0012 | 0 | NA | NA |
| NM_001130713 | LEF1            | 0.348477964561563 | 0                  | 2.00E-04 | 1 | 0.0012 | 0 | NA | NA |
| NM_001130714 | LEF1            | 0.348477964561563 | 0                  | 2.00E-04 | 1 | 0.0012 | 0 | NA | NA |
| NM_016269    | LEF1            | 0.348477964561563 | 0                  | 2.00E-04 | 1 | 0.0012 | 0 | NA | NA |
| NM_001122757 | POU1F1          | 0.348023625624716 | 0                  | 2.00E-04 | 1 | 0.0012 | 0 | NA | NA |
| NM_000306    | POU1F1          | 0.348023625624716 | 0                  | 2.00E-04 | 1 | 0.0012 | 0 | NA | NA |
| NM_001251987 | TRDN            | 0.435711040436165 | 0.0876874148114493 | 2.00E-04 | 1 | 0.0012 | 0 | NA | NA |
| NM_006073    | TRDN            | 0.435711040436165 | 0.0876874148114493 | 2.00E-04 | 1 | 0.0012 | 0 | NA | NA |
| NM_001256022 | TRDN            | 0.435711040436165 | 0.0876874148114493 | 2.00E-04 | 1 | 0.0012 | 0 | NA | NA |
| NM_001256021 | TRDN            | 0.435711040436165 | 0.0876874148114493 | 2.00E-04 | 1 | 0.0012 | 0 | NA | NA |
| NM_001256020 | TRDN            | 0.435711040436165 | 0.0876874148114493 | 2.00E-04 | 1 | 0.0012 | 0 | NA | NA |
| NM_003262    | SEC62           | 0.347569286687869 | 0                  | 2.00E-04 | 1 | 0.0012 | 0 | NA | NA |
| NM_024015    | HOXB4           | 0.347569286687869 | 0                  | 2.00E-04 | 1 | 0.0012 | 0 | NA | NA |
| NR_026830    | SATB2-AS1       | 0.346660608814175 | 0                  | 2.00E-04 | 1 | 0.0012 | 0 | NA | NA |
| NM_001204078 | ATP6V1G2        | 0.346660608814175 | 0                  | 2.00E-04 | 1 | 0.0012 | 0 | NA | NA |
| NM_138282    | ATP6V1G2        | 0.346660608814175 | 0                  | 2.00E-04 | 1 | 0.0012 | 0 | NA | NA |
| NR_037853    | ATP6V1G2-DDX39B | 0.346660608814175 | 0                  | 2.00E-04 | 1 | 0.0012 | 0 | NA | NA |
| NM_130463    | ATP6V1G2        | 0.346660608814175 | 0                  | 2.00E-04 | 1 | 0.0012 | 0 | NA | NA |
| NM_030958    | SLCO5A1         | 0.346660608814175 | 0                  | 2.00E-04 | 1 | 0.0012 | 0 | NA | NA |
| NR_036454    | CHMP3           | 0.345751930940482 | 0                  | 2.00E-04 | 1 | 0.0012 | 0 | NA | NA |
| NM_016079    | CHMP3           | 0.345751930940482 | 0                  | 2.00E-04 | 1 | 0.0012 | 0 | NA | NA |
| NM_001193517 | CHMP3           | 0.345751930940482 | 0                  | 2.00E-04 | 1 | 0.0012 | 0 | NA | NA |
| NM_001005753 | CHMP3           | 0.345751930940482 | 0                  | 2.00E-04 | 1 | 0.0012 | 0 | NA | NA |
| NM_012352    | OR1A2           | 0.344388914129941 | 0                  | 2.00E-04 | 1 | 0.0012 | 0 | NA | NA |
| NM_001166281 | MUSK            | 0.343934575193094 | 0                  | 2.00E-04 | 1 | 0.0012 | 0 | NA | NA |
| NM_001166280 | MUSK            | 0.343934575193094 | 0                  | 2.00E-04 | 1 | 0.0012 | 0 | NA | NA |
| NM_005592    | MUSK            | 0.343934575193094 | 0                  | 2.00E-04 | 1 | 0.0012 | 0 | NA | NA |
| NM_152722    | HEPACAM         | 0.343934575193094 | 0                  | 2.00E-04 | 1 | 0.0012 | 0 | NA | NA |
| NM_004365    | CETN3           | 0.343934575193094 | 0                  | 2.00E-04 | 1 | 0.0012 | 0 | NA | NA |
| NM_015549    | PLEKHG3         | 0.343480236256247 | 0                  | 2.00E-04 | 1 | 0.0012 | 0 | NA | NA |
| NM_001144956 | RIIAD1          | 0.3430258973194   | 0                  | 2.00E-04 | 1 | 0.0012 | 0 | NA | NA |
| NR_026939    | CASC2           | 0.3430258973194   | 0                  | 2.00E-04 | 1 | 0.0012 | 0 | NA | NA |
| NR_026940    | CASC2           | 0.3430258973194   | 0                  | 2.00E-04 | 1 | 0.0012 | 0 | NA | NA |
| NR_026941    | CASC2           | 0.3430258973194   | 0                  | 2.00E-04 | 1 | 0.0012 | 0 | NA | NA |
| NM_003005    | SELP            | 0.342571558382553 | 0                  | 2.00E-04 | 1 | 0.0012 | 0 | NA | NA |
| NM_001905    | CTPS1           | 0.342117219445706 | 0                  | 2.00E-04 | 1 | 0.0012 | 0 | NA | NA |
| NM_012295    | CABIN1          | 0.342117219445706 | 0                  | 2.00E-04 | 1 | 0.0012 | 0 | NA | NA |
| NM_001201429 | CABIN1          | 0.342117219445706 | 0                  | 2.00E-04 | 1 | 0.0012 | 0 | NA | NA |
| NM_001199281 | CABIN1          | 0.342117219445706 | 0                  | 2.00E-04 | 1 | 0.0012 | 0 | NA | NA |
| NM_001281429 | PCED1B          | 0.341208541572013 | 0                  | 2.00E-04 | 1 | 0.0012 | 0 | NA | NA |

|              |                  |                   |                   |          |   |        |   |    |    |
|--------------|------------------|-------------------|-------------------|----------|---|--------|---|----|----|
| NM_138371    | <i>PCED1B</i>    | 0.341208541572013 | 0                 | 2.00E-04 | 1 | 0.0012 | 0 | NA | NA |
| NM_002811    | <i>PSMD7</i>     | 0.341208541572013 | 0                 | 2.00E-04 | 1 | 0.0012 | 0 | NA | NA |
| NM_004162    | <i>RAB5A</i>     | 0.341208541572013 | 0                 | 2.00E-04 | 1 | 0.0012 | 0 | NA | NA |
| NM_001161586 | <i>ME3</i>       | 0.341208541572013 | 0                 | 2.00E-04 | 1 | 0.0012 | 0 | NA | NA |
| NM_001242503 | <i>DIO2</i>      | 0.341208541572013 | 0                 | 2.00E-04 | 1 | 0.0012 | 0 | NA | NA |
| NM_001242502 | <i>DIO2</i>      | 0.341208541572013 | 0                 | 2.00E-04 | 1 | 0.0012 | 0 | NA | NA |
| NM_001007023 | <i>DIO2</i>      | 0.341208541572013 | 0                 | 2.00E-04 | 1 | 0.0012 | 0 | NA | NA |
| NM_005047    | <i>PSMD5</i>     | 0.341208541572013 | 0                 | 2.00E-04 | 1 | 0.0012 | 0 | NA | NA |
| NM_001270427 | <i>PSMD5</i>     | 0.341208541572013 | 0                 | 2.00E-04 | 1 | 0.0012 | 0 | NA | NA |
| NM_145248    | <i>SPACA7</i>    | 0.340754202635166 | 0                 | 2.00E-04 | 1 | 0.0012 | 0 | NA | NA |
| NM_181619    | <i>KRTAP21-1</i> | 0.340754202635166 | 0                 | 2.00E-04 | 1 | 0.0012 | 0 | NA | NA |
| NR_036441    | <i>VRK2</i>      | 0.340299863698319 | 0                 | 2.00E-04 | 1 | 0.0012 | 0 | NA | NA |
| NM_001130480 | <i>VRK2</i>      | 0.340299863698319 | 0                 | 2.00E-04 | 1 | 0.0012 | 0 | NA | NA |
| NM_001130482 | <i>VRK2</i>      | 0.340299863698319 | 0                 | 2.00E-04 | 1 | 0.0012 | 0 | NA | NA |
| NM_001130483 | <i>VRK2</i>      | 0.340299863698319 | 0                 | 2.00E-04 | 1 | 0.0012 | 0 | NA | NA |
| NM_006296    | <i>VRK2</i>      | 0.340299863698319 | 0                 | 2.00E-04 | 1 | 0.0012 | 0 | NA | NA |
| NR_049781    | <i>VRK2</i>      | 0.340299863698319 | 0                 | 2.00E-04 | 1 | 0.0012 | 0 | NA | NA |
| NM_001139444 | <i>TRAPPC3L</i>  | 0.340299863698319 | 0                 | 2.00E-04 | 1 | 0.0012 | 0 | NA | NA |
| NM_199227    | <i>METAP1D</i>   | 0.339845524761472 | 0                 | 2.00E-04 | 1 | 0.0012 | 0 | NA | NA |
| NM_022483    | <i>C5orf28</i>   | 0.494320763289414 | 0.154475238527942 | 2.00E-04 | 1 | 0.0012 | 0 | NA | NA |
| NM_015299    | <i>KHNYN</i>     | 0.339391185824625 | 0                 | 2.00E-04 | 1 | 0.0012 | 0 | NA | NA |
| NR_033579    | <i>CSPG4P8</i>   | 0.339391185824625 | 0                 | 2.00E-04 | 1 | 0.0012 | 0 | NA | NA |
| NM_007351    | <i>MMRN1</i>     | 0.339391185824625 | 0                 | 2.00E-04 | 1 | 0.0012 | 0 | NA | NA |
| NM_001146344 | <i>PRAMEF11</i>  | 0.338936846887778 | 0                 | 2.00E-04 | 1 | 0.0012 | 0 | NA | NA |
| NM_002974    | <i>SERPINB4</i>  | 0.338482507950931 | 0                 | 2.00E-04 | 1 | 0.0012 | 0 | NA | NA |
| NM_016039    | <i>C14orf166</i> | 0.338028169014085 | 0                 | 2.00E-04 | 1 | 0.0012 | 0 | NA | NA |
| NM_012176    | <i>FBXO4</i>     | 0.338028169014085 | 0                 | 2.00E-04 | 1 | 0.0012 | 0 | NA | NA |
| NM_033484    | <i>FBXO4</i>     | 0.338028169014085 | 0                 | 2.00E-04 | 1 | 0.0012 | 0 | NA | NA |
| NM_013333    | <i>EPN1</i>      | 0.337573830077238 | 0                 | 2.00E-04 | 1 | 0.0012 | 0 | NA | NA |
| NM_001130072 | <i>EPN1</i>      | 0.337573830077238 | 0                 | 2.00E-04 | 1 | 0.0012 | 0 | NA | NA |
| NM_001146267 | <i>GPR85</i>     | 0.337573830077238 | 0                 | 2.00E-04 | 1 | 0.0012 | 0 | NA | NA |
| NM_005454    | <i>CER1</i>      | 0.337573830077238 | 0                 | 2.00E-04 | 1 | 0.0012 | 0 | NA | NA |
| NM_001100874 | <i>SLC9B1</i>    | 0.337119491140391 | 0                 | 2.00E-04 | 1 | 0.0012 | 0 | NA | NA |
| NM_139173    | <i>SLC9B1</i>    | 0.337119491140391 | 0                 | 2.00E-04 | 1 | 0.0012 | 0 | NA | NA |
| NR_047515    | <i>SLC9B1</i>    | 0.337119491140391 | 0                 | 2.00E-04 | 1 | 0.0012 | 0 | NA | NA |
| NR_047513    | <i>SLC9B1</i>    | 0.337119491140391 | 0                 | 2.00E-04 | 1 | 0.0012 | 0 | NA | NA |
| NM_007191    | <i>WIF1</i>      | 0.336665152203544 | 0                 | 2.00E-04 | 1 | 0.0012 | 0 | NA | NA |
| NM_007107    | <i>SSR3</i>      | 0.409359382099046 | 0.072694229895502 | 2.00E-04 | 1 | 0.0012 | 0 | NA | NA |
| NM_001005170 | <i>OR52I2</i>    | 0.336210813266697 | 0                 | 2.00E-04 | 1 | 0.0012 | 0 | NA | NA |
| NM_001964    | <i>EGR1</i>      | 0.336210813266697 | 0                 | 2.00E-04 | 1 | 0.0012 | 0 | NA | NA |
| NM_001141945 | <i>ACTA2</i>     | 0.336210813266697 | 0                 | 2.00E-04 | 1 | 0.0012 | 0 | NA | NA |

|              |                |                   |                    |          |   |        |          |    |    |
|--------------|----------------|-------------------|--------------------|----------|---|--------|----------|----|----|
| NM_002187    | <i>IL12B</i>   | 0.335302135393003 | 0                  | 2.00E-04 | 1 | 0.0012 | 0        | NA | NA |
| NM_001137548 | <i>FAM25C</i>  | 0.334393457519309 | 0                  | 2.00E-04 | 1 | 0.0012 | 0        | NA | NA |
| NM_001137549 | <i>FAM25G</i>  | 0.334393457519309 | 0                  | 2.00E-04 | 1 | 0.0012 | 0        | NA | NA |
| NM_001177704 | <i>FREM1</i>   | 0.334393457519309 | 0                  | 2.00E-04 | 1 | 0.0012 | 0        | NA | NA |
| NM_001136194 | <i>FASTKD2</i> | 0.333939118582463 | 0                  | 2.00E-04 | 1 | 0.0012 | 0        | NA | NA |
| NM_001136193 | <i>FASTKD2</i> | 0.333939118582463 | 0                  | 2.00E-04 | 1 | 0.0012 | 0        | NA | NA |
| NM_014929    | <i>FASTKD2</i> | 0.333939118582463 | 0                  | 2.00E-04 | 1 | 0.0012 | 0        | NA | NA |
| NM_003241    | <i>TGM4</i>    | 0.333939118582463 | 0                  | 2.00E-04 | 1 | 0.0012 | 0        | NA | NA |
| NM_001001914 | <i>OR2G3</i>   | 0.333484779645616 | 0                  | 2.00E-04 | 1 | 0.0012 | 0        | NA | NA |
| NM_001199622 | <i>NCOA7</i>   | 0.332576101771922 | 0                  | 2.00E-04 | 1 | 0.0012 | 0        | NA | NA |
| NM_203395    | <i>IYD</i>     | 0.332576101771922 | 0                  | 2.00E-04 | 1 | 0.0012 | 0        | NA | NA |
| NM_001164695 | <i>IYD</i>     | 0.332576101771922 | 0                  | 2.00E-04 | 1 | 0.0012 | 0        | NA | NA |
| NM_001164694 | <i>IYD</i>     | 0.332576101771922 | 0                  | 2.00E-04 | 1 | 0.0012 | 0        | NA | NA |
| NM_001146333 | <i>SUMF2</i>   | 0.332576101771922 | 0                  | 2.00E-04 | 1 | 0.0012 | 0        | NA | NA |
| NM_001130069 | <i>SUMF2</i>   | 0.332576101771922 | 0                  | 2.00E-04 | 1 | 0.0012 | 0        | NA | NA |
| NM_015411    | <i>SUMF2</i>   | 0.332576101771922 | 0                  | 2.00E-04 | 1 | 0.0012 | 0        | NA | NA |
| NM_001042469 | <i>SUMF2</i>   | 0.332576101771922 | 0                  | 2.00E-04 | 1 | 0.0012 | 0        | NA | NA |
| NM_001042470 | <i>SUMF2</i>   | 0.332576101771922 | 0                  | 2.00E-04 | 1 | 0.0012 | 0        | NA | NA |
| NM_001159353 | <i>REG4</i>    | 0.332576101771922 | 0                  | 2.00E-04 | 1 | 0.0012 | 0        | NA | NA |
| NM_001159352 | <i>REG4</i>    | 0.332576101771922 | 0                  | 2.00E-04 | 1 | 0.0012 | 0        | NA | NA |
| NM_032044    | <i>REG4</i>    | 0.332576101771922 | 0                  | 2.00E-04 | 1 | 0.0012 | 0        | NA | NA |
| NM_206966    | <i>C5orf46</i> | 0.332121762835075 | 0                  | 2.00E-04 | 1 | 0.0012 | 0        | NA | NA |
| NM_020805    | <i>KLHL14</i>  | 0.331667423898228 | 0                  | 2.00E-04 | 1 | 0.0012 | 0        | NA | NA |
| NM_005217    | <i>DEFA3</i>   | 0.331667423898228 | 0                  | 2.00E-04 | 1 | 0.0012 | 0        | NA | NA |
| NM_198399    | <i>ARPP21</i>  | 0.358927760109041 | 0.0272603362108133 | 2.00E-04 | 1 | 0.0012 | 0        | NA | NA |
| NM_001197319 | <i>CLEC2D</i>  | 0.331213084961381 | 0                  | 2.00E-04 | 1 | 0.0012 | 0        | NA | NA |
| NM_001197318 | <i>CLEC2D</i>  | 0.331213084961381 | 0                  | 2.00E-04 | 1 | 0.0012 | 0        | NA | NA |
| NM_001197317 | <i>CLEC2D</i>  | 0.331213084961381 | 0                  | 2.00E-04 | 1 | 0.0012 | 0        | NA | NA |
| NR_036693    | <i>CLEC2D</i>  | 0.331213084961381 | 0                  | 2.00E-04 | 1 | 0.0012 | 0        | NA | NA |
| NM_013269    | <i>CLEC2D</i>  | 0.331213084961381 | 0                  | 2.00E-04 | 1 | 0.0012 | 0        | NA | NA |
| NM_001004419 | <i>CLEC2D</i>  | 0.331213084961381 | 0                  | 2.00E-04 | 1 | 0.0012 | 0        | NA | NA |
| NM_024949    | <i>WWC2</i>    | 0.331213084961381 | 0                  | 6.00E-04 | 1 | 0.003  | 1.00E-04 | NA | NA |
| NM_001257195 | <i>KLHL3</i>   | 0.331213084961381 | 0                  | 2.00E-04 | 1 | 0.0012 | 0        | NA | NA |
| NM_016010    | <i>ZC2HC1A</i> | 0.341208541572013 | 0.0104497955474784 | 2.00E-04 | 1 | 0.0012 | 0        | NA | NA |
| NM_000734    | <i>CD247</i>   | 0.330758746024534 | 0                  | 2.00E-04 | 1 | 0.0012 | 0        | NA | NA |
| NM_198053    | <i>CD247</i>   | 0.330758746024534 | 0                  | 2.00E-04 | 1 | 0.0012 | 0        | NA | NA |
| NM_005366    | <i>MAGEA11</i> | 0.330758746024534 | 0                  | 2.00E-04 | 1 | 0.0012 | 0        | NA | NA |
| NR_003554    | <i>USP32P2</i> | 0.330304407087687 | 0                  | 2.00E-04 | 1 | 0.0012 | 0        | NA | NA |
| NM_018534    | <i>NRP2</i>    | 0.329850068150841 | 0                  | 2.00E-04 | 1 | 0.0012 | 0        | NA | NA |
| NM_201279    | <i>NRP2</i>    | 0.329850068150841 | 0                  | 2.00E-04 | 1 | 0.0012 | 0        | NA | NA |
| NM_003872    | <i>NRP2</i>    | 0.329850068150841 | 0                  | 2.00E-04 | 1 | 0.0012 | 0        | NA | NA |

|              |                  |                   |                     |          |        |        |   |    |    |
|--------------|------------------|-------------------|---------------------|----------|--------|--------|---|----|----|
| NM_201267    | <i>NRP2</i>      | 0.329850068150841 | 0                   | 2.00E-04 | 1      | 0.0012 | 0 | NA | NA |
| NM_201266    | <i>NRP2</i>      | 0.329850068150841 | 0                   | 2.00E-04 | 1      | 0.0012 | 0 | NA | NA |
| NM_201264    | <i>NRP2</i>      | 0.329850068150841 | 0                   | 2.00E-04 | 1      | 0.0012 | 0 | NA | NA |
| NM_018980    | <i>TAS2R5</i>    | 0.329850068150841 | 0                   | 2.00E-04 | 1      | 0.0012 | 0 | NA | NA |
| NM_022484    | <i>TMEM168</i>   | 0.329850068150841 | 0                   | 2.00E-04 | 1      | 0.0012 | 0 | NA | NA |
| NM_001002923 | <i>IGFL4</i>     | 0.329395729213994 | 0                   | 2.00E-04 | 1      | 0.0012 | 0 | NA | NA |
| NM_001142614 | <i>EHBP1</i>     | 0.328941390277147 | 0                   | 2.00E-04 | 1      | 0.0012 | 0 | NA | NA |
| NM_003856    | <i>IL1RL1</i>    | 0.328941390277147 | 0                   | 2.00E-04 | 1      | 0.0012 | 0 | NA | NA |
| NR_104167    | <i>IL1RL1</i>    | 0.328941390277147 | 0                   | 2.00E-04 | 1      | 0.0012 | 0 | NA | NA |
| NM_053039    | <i>UGT2B28</i>   | 0.328941390277147 | 0                   | 2.00E-04 | 1      | 0.0012 | 0 | NA | NA |
| NM_001207004 | <i>UGT2B28</i>   | 0.328941390277147 | 0                   | 2.00E-04 | 1      | 0.0012 | 0 | NA | NA |
| NM_001005240 | <i>OR4F17</i>    | 0.3284870513403   | 0                   | 2.00E-04 | 1      | 0.0012 | 0 | NA | NA |
| NM_032119    | <i>GPR98</i>     | 0.3284870513403   | 0                   | 2.00E-04 | 1      | 0.0012 | 0 | NA | NA |
| NR_003149    | <i>GPR98</i>     | 0.3284870513403   | 0                   | 2.00E-04 | 1      | 0.0012 | 0 | NA | NA |
| NM_001042500 | <i>DEFA1B</i>    | 0.3284870513403   | 0                   | 2.00E-04 | 1      | 0.0012 | 0 | NA | NA |
| NR_034145    | <i>LINC00670</i> | 0.328032712403453 | 0                   | 2.00E-04 | 1      | 0.0012 | 0 | NA | NA |
| NR_034144    | <i>LINC00670</i> | 0.328032712403453 | 0                   | 2.00E-04 | 0.9998 | 0.0012 | 0 | NA | NA |
| NR_036209    | <i>MIR4324</i>   | 0.328032712403453 | 0                   | 2.00E-04 | 1      | 0.0012 | 0 | NA | NA |
| NM_002395    | <i>ME1</i>       | 0.328032712403453 | 0                   | 2.00E-04 | 1      | 0.0012 | 0 | NA | NA |
| NM_001017418 | <i>SPRR2B</i>    | 0.327124034529759 | 0                   | 2.00E-04 | 1      | 0.0012 | 0 | NA | NA |
| NM_014461    | <i>CNTN6</i>     | 0.33575647432985  | 0.00954111767378464 | 2.00E-04 | 1      | 0.0012 | 0 | NA | NA |
| NM_000590    | <i>IL9</i>       | 0.326215356656065 | 0                   | 2.00E-04 | 1      | 0.0012 | 0 | NA | NA |
| NM_001001413 | <i>GOLGA6L1</i>  | 0.325761017719219 | 0                   | 2.00E-04 | 1      | 0.0012 | 0 | NA | NA |
| NM_014143    | <i>CD274</i>     | 0.325761017719219 | 0                   | 2.00E-04 | 1      | 0.0012 | 0 | NA | NA |
| NR_052005    | <i>CD274</i>     | 0.325761017719219 | 0                   | 2.00E-04 | 1      | 0.0012 | 0 | NA | NA |
| NM_001267706 | <i>CD274</i>     | 0.325761017719219 | 0                   | 2.00E-04 | 0.9998 | 0.0012 | 0 | NA | NA |
| NM_001160277 | <i>CERKL</i>     | 0.325761017719219 | 0                   | 2.00E-04 | 1      | 0.0012 | 0 | NA | NA |
| NM_201548    | <i>CERKL</i>     | 0.325761017719219 | 0                   | 2.00E-04 | 1      | 0.0012 | 0 | NA | NA |
| NM_001030311 | <i>CERKL</i>     | 0.325761017719219 | 0                   | 2.00E-04 | 1      | 0.0012 | 0 | NA | NA |
| NM_001030313 | <i>CERKL</i>     | 0.325761017719219 | 0                   | 2.00E-04 | 1      | 0.0012 | 0 | NA | NA |
| NM_001030312 | <i>CERKL</i>     | 0.325761017719219 | 0                   | 2.00E-04 | 1      | 0.0012 | 0 | NA | NA |
| NR_027690    | <i>CERKL</i>     | 0.325761017719219 | 0                   | 2.00E-04 | 1      | 0.0012 | 0 | NA | NA |
| NR_027689    | <i>CERKL</i>     | 0.325761017719219 | 0                   | 2.00E-04 | 1      | 0.0012 | 0 | NA | NA |
| NM_001004697 | <i>OR2T5</i>     | 0.325306678782372 | 0                   | 2.00E-04 | 1      | 0.0012 | 0 | NA | NA |
| NM_006771    | <i>KRT38</i>     | 0.325306678782372 | 0                   | 2.00E-04 | 1      | 0.0012 | 0 | NA | NA |
| NM_001005747 | <i>CACNB4</i>    | 0.325306678782372 | 0                   | 2.00E-04 | 1      | 0.0012 | 0 | NA | NA |
| NM_178527    | <i>SLC9C2</i>    | 0.324398000908678 | 0                   | 2.00E-04 | 1      | 0.0012 | 0 | NA | NA |
| NM_001781    | <i>CD69</i>      | 0.324398000908678 | 0                   | 2.00E-04 | 1      | 0.0012 | 0 | NA | NA |
| NM_000493    | <i>COL10A1</i>   | 0.324398000908678 | 0                   | 2.00E-04 | 1      | 0.0012 | 0 | NA | NA |
| NM_005313    | <i>PDIA3</i>     | 0.323943661971831 | 0                   | 2.00E-04 | 1      | 0.0012 | 0 | NA | NA |
| NM_006284    | <i>TAF10</i>     | 0.323943661971831 | 0                   | 2.00E-04 | 1      | 0.0012 | 0 | NA | NA |



|              |                  |                   |                    |          |        |        |          |    |    |
|--------------|------------------|-------------------|--------------------|----------|--------|--------|----------|----|----|
| NM_001010912 | <i>C10orf120</i> | 0.323489323034984 | 0                  | 2.00E-04 | 1      | 0.0012 | 0        | NA | NA |
| NM_006493    | <i>CLN5</i>      | 0.323034984098137 | 0                  | 2.00E-04 | 1      | 0.0012 | 0        | NA | NA |
| NM_002758    | <i>MAP2K6</i>    | 0.323034984098137 | 0                  | 2.00E-04 | 1      | 0.0012 | 0        | NA | NA |
| NM_145282    | <i>SLC25A48</i>  | 0.323034984098137 | 0                  | 2.00E-04 | 1      | 0.0012 | 0        | NA | NA |
| NM_001278495 | <i>NUTM2B</i>    | 0.32258064516129  | 0                  | 0.0018   | 0.9988 | 0.0112 | 2.00E-04 | NA | NA |
| NM_003517    | <i>HIST2H2AC</i> | 0.322126306224443 | 0                  | 2.00E-04 | 1      | 0.0012 | 0        | NA | NA |
| NM_017878    | <i>HRASLS2</i>   | 0.322126306224443 | 0                  | 2.00E-04 | 1      | 0.0012 | 0        | NA | NA |
| NM_001127453 | <i>DFNA5</i>     | 0.322126306224443 | 0                  | 2.00E-04 | 1      | 0.0012 | 0        | NA | NA |
| NM_001205250 | <i>ACSL6</i>     | 0.321671967287597 | 0                  | 2.00E-04 | 1      | 0.0012 | 0        | NA | NA |
| NM_080866    | <i>SLC22A9</i>   | 0.32121762835075  | 0                  | 2.00E-04 | 1      | 0.0012 | 0        | NA | NA |
| NM_001010844 | <i>IRAK1BP1</i>  | 0.359382099045888 | 0.0381644706951386 | 2.00E-04 | 1      | 0.0012 | 0        | NA | NA |
| NM_002603    | <i>PDE7A</i>     | 0.320763289413903 | 0                  | 2.00E-04 | 1      | 0.0012 | 0        | NA | NA |
| NM_006952    | <i>UPK1B</i>     | 0.320308950477056 | 0                  | 2.00E-04 | 1      | 0.0012 | 0        | NA | NA |
| NM_001172105 | <i>GRAMD1C</i>   | 0.319854611540209 | 0                  | 2.00E-04 | 1      | 0.0012 | 0        | NA | NA |
| NM_001163264 | <i>PCYT1B</i>    | 0.319854611540209 | 0                  | 2.00E-04 | 1      | 0.0012 | 0        | NA | NA |
| NR_003558    | <i>WBP11P1</i>   | 0.319400272603362 | 0                  | 2.00E-04 | 1      | 0.0012 | 0        | NA | NA |
| NM_001243512 | <i>ESRRG</i>     | 0.319400272603362 | 0                  | 2.00E-04 | 1      | 0.0012 | 0        | NA | NA |
| NM_001243511 | <i>ESRRG</i>     | 0.319400272603362 | 0                  | 2.00E-04 | 1      | 0.0012 | 0        | NA | NA |
| NM_001243510 | <i>ESRRG</i>     | 0.319400272603362 | 0                  | 2.00E-04 | 1      | 0.0012 | 0        | NA | NA |
| NM_001243513 | <i>ESRRG</i>     | 0.319400272603362 | 0                  | 2.00E-04 | 1      | 0.0012 | 0        | NA | NA |
| NM_001001658 | <i>OR9A2</i>     | 0.319400272603362 | 0                  | 2.00E-04 | 1      | 0.0012 | 0        | NA | NA |
| NM_020190    | <i>OLFML3</i>    | 0.318491594729668 | 0                  | 2.00E-04 | 1      | 0.0012 | 0        | NA | NA |
| NM_032955    | <i>AIF1</i>      | 0.318491594729668 | 0                  | 2.00E-04 | 1      | 0.0012 | 0        | NA | NA |
| NM_170753    | <i>PGBD3</i>     | 0.318491594729668 | 0                  | 2.00E-04 | 1      | 0.0012 | 0        | NA | NA |
| NM_001253846 | <i>GMDS</i>      | 0.318491594729668 | 0                  | 2.00E-04 | 1      | 0.0012 | 0        | NA | NA |
| NM_000846    | <i>GSTA2</i>     | 0.318491594729668 | 0                  | 2.00E-04 | 1      | 0.0012 | 0        | NA | NA |
| NM_001005484 | <i>OR4F5</i>     | 0.394820536119945 | 0.076783280327124  | 2.00E-04 | 1      | 0.0012 | 0        | NA | NA |
| NM_001142306 | <i>C5orf60</i>   | 0.318037255792821 | 0                  | 2.00E-04 | 1      | 0.0012 | 0        | NA | NA |
| NR_015400    | <i>LINC00879</i> | 0.44525215810995  | 0.127669241253975  | 2.00E-04 | 1      | 0.0012 | 0        | NA | NA |
| NM_001037332 | <i>CYFIP2</i>    | 0.317582916855975 | 0                  | 2.00E-04 | 1      | 0.0012 | 0        | NA | NA |
| NM_003022    | <i>SH3BGRL</i>   | 0.317582916855975 | 0                  | 2.00E-04 | 1      | 0.0012 | 0        | NA | NA |
| NM_133486    | <i>MBNL3</i>     | 0.317582916855975 | 0                  | 2.00E-04 | 1      | 0.0012 | 0        | NA | NA |
| NM_018388    | <i>MBNL3</i>     | 0.317582916855975 | 0                  | 2.00E-04 | 1      | 0.0012 | 0        | NA | NA |
| NM_001432    | <i>EREG</i>      | 0.317128577919128 | 0                  | 2.00E-04 | 1      | 0.0012 | 0        | NA | NA |
| NM_014482    | <i>BMP10</i>     | 0.317128577919128 | 0                  | 2.00E-04 | 1      | 0.0012 | 0        | NA | NA |
| NM_001135701 | <i>YWHAZ</i>     | 0.385733757383008 | 0.06860517946388   | 2.00E-04 | 1      | 0.0012 | 0        | NA | NA |
| NM_001135700 | <i>YWHAZ</i>     | 0.385733757383008 | 0.06860517946388   | 2.00E-04 | 1      | 0.0012 | 0        | NA | NA |
| NR_003045    | <i>SNORD17</i>   | 0.373466606088142 | 0.0563380281690141 | 6.00E-04 | 0.9992 | 0.003  | 1.00E-04 | NA | NA |
| NM_002430    | <i>MN1</i>       | 0.456610631531122 | 0.139482053611995  | 2.00E-04 | 1      | 0.0012 | 0        | NA | NA |
| NM_001002907 | <i>OR8K1</i>     | 0.316219900045434 | 0                  | 2.00E-04 | 1      | 0.0012 | 0        | NA | NA |
| NM_004662    | <i>DNAH9</i>     | 0.316219900045434 | 0                  | 2.00E-04 | 1      | 0.0012 | 0        | NA | NA |

|              |                     |                   |                  |          |   |        |   |    |        |
|--------------|---------------------|-------------------|------------------|----------|---|--------|---|----|--------|
| NR_027392    | <i>INTS4L2</i>      | 0.316219900045434 | 0                | 2.00E-04 | 1 | 0.0012 | 0 | NA | NA     |
| NM_001128834 | <i>PLP1</i>         | 0.316219900045434 | 0                | 2.00E-04 | 1 | 0.0012 | 0 | NA | NA     |
| NM_001198531 | <i>TCF7L2</i>       | 0.315765561108587 | 0                | 2.00E-04 | 1 | 0.0012 | 0 | NA | NA     |
| NM_001146286 | <i>TCF7L2</i>       | 0.315765561108587 | 0                | 2.00E-04 | 1 | 0.0012 | 0 | NA | NA     |
| NM_001146285 | <i>TCF7L2</i>       | 0.315765561108587 | 0                | 2.00E-04 | 1 | 0.0012 | 0 | NA | NA     |
| NM_001146284 | <i>TCF7L2</i>       | 0.315765561108587 | 0                | 2.00E-04 | 1 | 0.0012 | 0 | NA | NA     |
| NM_001146283 | <i>TCF7L2</i>       | 0.315765561108587 | 0                | 2.00E-04 | 1 | 0.0012 | 0 | NA | NA     |
| NM_001198526 | <i>TCF7L2</i>       | 0.315765561108587 | 0                | 2.00E-04 | 1 | 0.0012 | 0 | NA | NA     |
| NM_001198525 | <i>TCF7L2</i>       | 0.315765561108587 | 0                | 2.00E-04 | 1 | 0.0012 | 0 | NA | NA     |
| NM_030756    | <i>TCF7L2</i>       | 0.315765561108587 | 0                | 2.00E-04 | 1 | 0.0012 | 0 | NA | NA     |
| NM_001198527 | <i>TCF7L2</i>       | 0.315765561108587 | 0                | 2.00E-04 | 1 | 0.0012 | 0 | NA | NA     |
| NM_001146274 | <i>TCF7L2</i>       | 0.315765561108587 | 0                | 2.00E-04 | 1 | 0.0012 | 0 | NA | NA     |
| NM_001198528 | <i>TCF7L2</i>       | 0.315765561108587 | 0                | 2.00E-04 | 1 | 0.0012 | 0 | NA | NA     |
| NM_001198529 | <i>TCF7L2</i>       | 0.315765561108587 | 0                | 2.00E-04 | 1 | 0.0012 | 0 | NA | NA     |
| NM_001198530 | <i>TCF7L2</i>       | 0.315765561108587 | 0                | 2.00E-04 | 1 | 0.0012 | 0 | NA | NA     |
| NM_001253829 | <i>PTPDC1</i>       | 0.528850522489777 | 0.21308496138119 | 2.00E-04 | 1 | 0.0012 | 0 | 1  | 0.0682 |
| NM_152422    | <i>PTPDC1</i>       | 0.528850522489777 | 0.21308496138119 | 2.00E-04 | 1 | 0.0012 | 0 | 1  | 0.0682 |
| NM_001128829 | <i>CA1</i>          | 0.315765561108587 | 0                | 2.00E-04 | 1 | 0.0012 | 0 | NA | NA     |
| NM_001128831 | <i>CA1</i>          | 0.315765561108587 | 0                | 2.00E-04 | 1 | 0.0012 | 0 | NA | NA     |
| NM_001738    | <i>CA1</i>          | 0.315765561108587 | 0                | 2.00E-04 | 1 | 0.0012 | 0 | NA | NA     |
| NM_001128830 | <i>CA1</i>          | 0.315765561108587 | 0                | 2.00E-04 | 1 | 0.0012 | 0 | NA | NA     |
| NM_000115    | <i>EDNRB</i>        | 0.31531122217174  | 0                | 2.00E-04 | 1 | 0.0012 | 0 | NA | NA     |
| NM_001100819 | <i>MOB4</i>         | 0.314856883234893 | 0                | 2.00E-04 | 1 | 0.0012 | 0 | NA | NA     |
| NM_015387    | <i>MOB4</i>         | 0.314856883234893 | 0                | 2.00E-04 | 1 | 0.0012 | 0 | NA | NA     |
| NM_012108    | <i>STAP1</i>        | 0.314856883234893 | 0                | 2.00E-04 | 1 | 0.0012 | 0 | NA | NA     |
| NM_001146210 | <i>SPDYE6</i>       | 0.314856883234893 | 0                | 2.00E-04 | 1 | 0.0012 | 0 | NA | NA     |
| NM_152556    | <i>C7orf60</i>      | 0.314856883234893 | 0                | 2.00E-04 | 1 | 0.0012 | 0 | NA | NA     |
| NM_007179    | <i>INSL6</i>        | 0.314856883234893 | 0                | 2.00E-04 | 1 | 0.0012 | 0 | NA | NA     |
| NM_020711    | <i>ERMN</i>         | 0.314402544298046 | 0                | 2.00E-04 | 1 | 0.0012 | 0 | NA | NA     |
| NM_001144892 | <i>FGF1</i>         | 0.314402544298046 | 0                | 2.00E-04 | 1 | 0.0012 | 0 | NA | NA     |
| NM_001257212 | <i>FGF1</i>         | 0.314402544298046 | 0                | 2.00E-04 | 1 | 0.0012 | 0 | NA | NA     |
| NM_032567    | <i>SPZ1</i>         | 0.313948205361199 | 0                | 2.00E-04 | 1 | 0.0012 | 0 | NA | NA     |
| NR_003945    | <i>GVINP1</i>       | 0.313948205361199 | 0                | 2.00E-04 | 1 | 0.0012 | 0 | NA | NA     |
| NM_001113397 | <i>ZNF385B</i>      | 0.313948205361199 | 0                | 2.00E-04 | 1 | 0.0012 | 0 | NA | NA     |
| NM_183395    | <i>NLRP3</i>        | 0.313493866424353 | 0                | 2.00E-04 | 1 | 0.0012 | 0 | NA | NA     |
| NM_004895    | <i>NLRP3</i>        | 0.313493866424353 | 0                | 2.00E-04 | 1 | 0.0012 | 0 | NA | NA     |
| NM_001127462 | <i>NLRP3</i>        | 0.313493866424353 | 0                | 2.00E-04 | 1 | 0.0012 | 0 | NA | NA     |
| NM_001243133 | <i>NLRP3</i>        | 0.313493866424353 | 0                | 2.00E-04 | 1 | 0.0012 | 0 | NA | NA     |
| NM_001005197 | <i>OR8D4</i>        | 0.313493866424353 | 0                | 2.00E-04 | 1 | 0.0012 | 0 | NA | NA     |
| NM_018293    | <i>ZNF654</i>       | 0.313493866424353 | 0                | 2.00E-04 | 1 | 0.0012 | 0 | NA | NA     |
| NR_037870    | <i>LOC100131825</i> | 0.313493866424353 | 0                | 2.00E-04 | 1 | 0.0012 | 0 | NA | NA     |

|              |          |                   |                   |          |   |        |   |    |    |
|--------------|----------|-------------------|-------------------|----------|---|--------|---|----|----|
| NM_018353    | MIS18BP1 | 0.313493866424353 | 0                 | 2.00E-04 | 1 | 0.0012 | 0 | NA | NA |
| NR_073499    | KHDRBS1  | 0.313039527487506 | 0                 | 2.00E-04 | 1 | 0.0012 | 0 | NA | NA |
| NM_006559    | KHDRBS1  | 0.313039527487506 | 0                 | 2.00E-04 | 1 | 0.0012 | 0 | NA | NA |
| NM_001271878 | KHDRBS1  | 0.313039527487506 | 0                 | 2.00E-04 | 1 | 0.0012 | 0 | NA | NA |
| NR_073498    | KHDRBS1  | 0.313039527487506 | 0                 | 2.00E-04 | 1 | 0.0012 | 0 | NA | NA |
| NM_002036    | DARC     | 0.313039527487506 | 0                 | 2.00E-04 | 1 | 0.0012 | 0 | NA | NA |
| NM_014697    | NOS1AP   | 0.312585188550659 | 0                 | 2.00E-04 | 1 | 0.0012 | 0 | NA | NA |
| NM_001164757 | NOS1AP   | 0.312585188550659 | 0                 | 2.00E-04 | 1 | 0.0012 | 0 | NA | NA |
| NM_006187    | OAS3     | 0.312585188550659 | 0                 | 2.00E-04 | 1 | 0.0012 | 0 | NA | NA |
| NR_036687    | DEFT1P2  | 0.312585188550659 | 0                 | 2.00E-04 | 1 | 0.0012 | 0 | NA | NA |
| NR_036686    | DEFT1P   | 0.312585188550659 | 0                 | 2.00E-04 | 1 | 0.0012 | 0 | NA | NA |
| NM_002105    | H2AFX    | 0.312130849613812 | 0                 | 2.00E-04 | 1 | 0.0012 | 0 | NA | NA |
| NM_053049    | UCN3     | 0.311676510676965 | 0                 | 2.00E-04 | 1 | 0.0012 | 0 | NA | NA |
| NM_032334    | UTP23    | 0.311676510676965 | 0                 | 2.00E-04 | 1 | 0.0012 | 0 | NA | NA |
| NM_001033044 | GLUL     | 0.311676510676965 | 0                 | 2.00E-04 | 1 | 0.0012 | 0 | NA | NA |
| NM_002065    | GLUL     | 0.311676510676965 | 0                 | 2.00E-04 | 1 | 0.0012 | 0 | NA | NA |
| NM_001258239 | TMEM218  | 0.311676510676965 | 0                 | 2.00E-04 | 1 | 0.0012 | 0 | NA | NA |
| NM_001258238 | TMEM218  | 0.311676510676965 | 0                 | 2.00E-04 | 1 | 0.0012 | 0 | NA | NA |
| NM_001258241 | TMEM218  | 0.311676510676965 | 0                 | 2.00E-04 | 1 | 0.0012 | 0 | NA | NA |
| NM_001258240 | TMEM218  | 0.311676510676965 | 0                 | 2.00E-04 | 1 | 0.0012 | 0 | NA | NA |
| NR_047587    | TMEM218  | 0.311676510676965 | 0                 | 2.00E-04 | 1 | 0.0012 | 0 | NA | NA |
| NR_047586    | TMEM218  | 0.311676510676965 | 0                 | 2.00E-04 | 1 | 0.0012 | 0 | NA | NA |
| NM_001171197 | ELAVL2   | 0.408905043162199 | 0.097228532485234 | 2.00E-04 | 1 | 0.0012 | 0 | NA | NA |
| NM_020124    | IFNK     | 0.311222171740118 | 0                 | 2.00E-04 | 1 | 0.0012 | 0 | NA | NA |
| NR_002319    | PIPSL    | 0.311222171740118 | 0                 | 2.00E-04 | 1 | 0.0012 | 0 | NA | NA |
| NM_006261    | PROP1    | 0.311222171740118 | 0                 | 2.00E-04 | 1 | 0.0012 | 0 | NA | NA |
| NM_203373    | FBXL22   | 0.310767832803271 | 0                 | 2.00E-04 | 1 | 0.0012 | 0 | NA | NA |
| NM_207355    | POTEB    | 0.310767832803271 | 0                 | 2.00E-04 | 1 | 0.0012 | 0 | NA | NA |
| NM_130446    | KLHL6    | 0.310767832803271 | 0                 | 2.00E-04 | 1 | 0.0012 | 0 | NA | NA |
| NM_001270410 | LIN9     | 0.310313493866424 | 0                 | 2.00E-04 | 1 | 0.0012 | 0 | NA | NA |
| NM_001270409 | LIN9     | 0.310313493866424 | 0                 | 2.00E-04 | 1 | 0.0012 | 0 | NA | NA |
| NM_173083    | LIN9     | 0.310313493866424 | 0                 | 2.00E-04 | 1 | 0.0012 | 0 | NA | NA |
| NM_001136051 | LRIG3    | 0.310313493866424 | 0                 | 2.00E-04 | 1 | 0.0012 | 0 | NA | NA |
| NM_001193306 | FPR1     | 0.310313493866424 | 0                 | 2.00E-04 | 1 | 0.0012 | 0 | NA | NA |
| NM_002029    | FPR1     | 0.310313493866424 | 0                 | 2.00E-04 | 1 | 0.0012 | 0 | NA | NA |
| NM_001146266 | GPR85    | 0.310313493866424 | 0                 | 2.00E-04 | 1 | 0.0012 | 0 | NA | NA |
| NM_000035    | ALDOB    | 0.310313493866424 | 0                 | 2.00E-04 | 1 | 0.0012 | 0 | NA | NA |
| NM_001004754 | OR51I2   | 0.309859154929577 | 0                 | 2.00E-04 | 1 | 0.0012 | 0 | NA | NA |
| NM_000862    | HSD3B1   | 0.309404815992731 | 0                 | 2.00E-04 | 1 | 0.0012 | 0 | NA | NA |
| NM_020439    | CAMK1G   | 0.309404815992731 | 0                 | 2.00E-04 | 1 | 0.0012 | 0 | NA | NA |
| NM_017593    | BMP2K    | 0.309404815992731 | 0                 | 2.00E-04 | 1 | 0.0012 | 0 | NA | NA |

|              |                  |                   |                    |          |   |        |   |    |    |
|--------------|------------------|-------------------|--------------------|----------|---|--------|---|----|----|
| NM_198892    | <i>BMP2K</i>     | 0.309404815992731 | 0                  | 2.00E-04 | 1 | 0.0012 | 0 | NA | NA |
| NM_001024661 | <i>PRAMEF13</i>  | 0.309404815992731 | 0                  | 2.00E-04 | 1 | 0.0012 | 0 | NA | NA |
| NR_104131    | <i>LINC01057</i> | 0.309404815992731 | 0                  | 2.00E-04 | 1 | 0.0012 | 0 | NA | NA |
| NM_016618    | <i>KRCC1</i>     | 0.309404815992731 | 0                  | 2.00E-04 | 1 | 0.0012 | 0 | NA | NA |
| NM_017619    | <i>RNPC3</i>     | 0.308950477055884 | 0                  | 2.00E-04 | 1 | 0.0012 | 0 | NA | NA |
| NM_013227    | <i>ACAN</i>      | 0.308950477055884 | 0                  | 2.00E-04 | 1 | 0.0012 | 0 | NA | NA |
| NM_001135    | <i>ACAN</i>      | 0.308950477055884 | 0                  | 2.00E-04 | 1 | 0.0012 | 0 | NA | NA |
| NM_152726    | <i>MICU2</i>     | 0.308950477055884 | 0                  | 2.00E-04 | 1 | 0.0012 | 0 | NA | NA |
| NM_001271699 | <i>ABCB7</i>     | 0.308950477055884 | 0                  | 2.00E-04 | 1 | 0.0012 | 0 | NA | NA |
| NM_001271697 | <i>ABCB7</i>     | 0.308950477055884 | 0                  | 2.00E-04 | 1 | 0.0012 | 0 | NA | NA |
| NM_001271696 | <i>ABCB7</i>     | 0.308950477055884 | 0                  | 2.00E-04 | 1 | 0.0012 | 0 | NA | NA |
| NM_004299    | <i>ABCB7</i>     | 0.308950477055884 | 0                  | 2.00E-04 | 1 | 0.0012 | 0 | NA | NA |
| NM_001271698 | <i>ABCB7</i>     | 0.308950477055884 | 0                  | 2.00E-04 | 1 | 0.0012 | 0 | NA | NA |
| NM_001130481 | <i>VRK2</i>      | 0.308496138119037 | 0                  | 2.00E-04 | 1 | 0.0012 | 0 | NA | NA |
| NM_001004450 | <i>OR1B1</i>     | 0.308496138119037 | 0                  | 2.00E-04 | 1 | 0.0012 | 0 | NA | NA |
| NM_005048    | <i>PTH2R</i>     | 0.30804179918219  | 0                  | 2.00E-04 | 1 | 0.0012 | 0 | NA | NA |
| NM_138425    | <i>C12orf57</i>  | 0.307587460245343 | 0                  | 2.00E-04 | 1 | 0.0012 | 0 | NA | NA |
| NM_000844    | <i>GRM7</i>      | 0.307133121308496 | 0                  | 2.00E-04 | 1 | 0.0012 | 0 | NA | NA |
| NM_181874    | <i>GRM7</i>      | 0.307133121308496 | 0                  | 2.00E-04 | 1 | 0.0012 | 0 | NA | NA |
| NM_152380    | <i>TBX15</i>     | 0.307133121308496 | 0                  | 2.00E-04 | 1 | 0.0012 | 0 | NA | NA |
| NM_001253876 | <i>UXS1</i>      | 0.388005452067242 | 0.080872330758746  | 2.00E-04 | 1 | 0.0012 | 0 | NA | NA |
| NM_006959    | <i>ZNF17</i>     | 0.306224443434802 | 0                  | 2.00E-04 | 1 | 0.0012 | 0 | NA | NA |
| NM_001199089 | <i>TDRD5</i>     | 0.305770104497955 | 0                  | 2.00E-04 | 1 | 0.0012 | 0 | NA | NA |
| NM_138320    | <i>PCSK6</i>     | 0.305770104497955 | 0                  | 2.00E-04 | 1 | 0.0012 | 0 | NA | NA |
| NM_138322    | <i>PCSK6</i>     | 0.305770104497955 | 0                  | 2.00E-04 | 1 | 0.0012 | 0 | NA | NA |
| NM_138321    | <i>PCSK6</i>     | 0.305770104497955 | 0                  | 2.00E-04 | 1 | 0.0012 | 0 | NA | NA |
| NM_138319    | <i>PCSK6</i>     | 0.305770104497955 | 0                  | 2.00E-04 | 1 | 0.0012 | 0 | NA | NA |
| NM_138323    | <i>PCSK6</i>     | 0.305770104497955 | 0                  | 2.00E-04 | 1 | 0.0012 | 0 | NA | NA |
| NM_002570    | <i>PCSK6</i>     | 0.305770104497955 | 0                  | 2.00E-04 | 1 | 0.0012 | 0 | NA | NA |
| NM_138324    | <i>PCSK6</i>     | 0.305770104497955 | 0                  | 2.00E-04 | 1 | 0.0012 | 0 | NA | NA |
| NM_138325    | <i>PCSK6</i>     | 0.305770104497955 | 0                  | 2.00E-04 | 1 | 0.0012 | 0 | NA | NA |
| NR_039825    | <i>MIR4678</i>   | 0.305315765561109 | 0                  | 2.00E-04 | 1 | 0.0012 | 0 | NA | NA |
| NM_001145004 | <i>GOLGA6L6</i>  | 0.304861426624262 | 0                  | 2.00E-04 | 1 | 0.0012 | 0 | NA | NA |
| NM_004727    | <i>SLC24A1</i>   | 0.304407087687415 | 0                  | 2.00E-04 | 1 | 0.0012 | 0 | NA | NA |
| NM_176876    | <i>P2RY12</i>    | 0.304407087687415 | 0                  | 2.00E-04 | 1 | 0.0012 | 0 | NA | NA |
| NM_017922    | <i>PRPF39</i>    | 0.303952748750568 | 0                  | 2.00E-04 | 1 | 0.0012 | 0 | NA | NA |
| NM_001130417 | <i>SLC8A3</i>    | 0.303952748750568 | 0                  | 2.00E-04 | 1 | 0.0012 | 0 | NA | NA |
| NM_182936    | <i>SLC8A3</i>    | 0.303952748750568 | 0                  | 2.00E-04 | 1 | 0.0012 | 0 | NA | NA |
| NM_018057    | <i>SLC6A15</i>   | 0.358473421172194 | 0.0545206724216265 | 2.00E-04 | 1 | 0.0012 | 0 | NA | NA |
| NM_001146335 | <i>SLC6A15</i>   | 0.358473421172194 | 0.0545206724216265 | 2.00E-04 | 1 | 0.0012 | 0 | NA | NA |
| NM_182767    | <i>SLC6A15</i>   | 0.358473421172194 | 0.0545206724216265 | 2.00E-04 | 1 | 0.0012 | 0 | NA | NA |

|              |              |                   |                    |          |          |        |    |        |    |
|--------------|--------------|-------------------|--------------------|----------|----------|--------|----|--------|----|
| NM_004267    | CHST2        | 0.303498409813721 | 0                  | 2.00E-04 | 1        | 0.0012 | 0  | NA     | NA |
| NM_001204178 | CHODL        | 0.303044070876874 | 0                  | 2.00E-04 | 1        | 0.0012 | 0  | NA     | NA |
| NM_001204177 | CHODL        | 0.303044070876874 | 0                  | 2.00E-04 | 1        | 0.0012 | 0  | NA     | NA |
| NM_001204176 | CHODL        | 0.303044070876874 | 0                  | 2.00E-04 | 1        | 0.0012 | 0  | NA     | NA |
| NM_001204175 | CHODL        | 0.303044070876874 | 0                  | 2.00E-04 | 1        | 0.0012 | 0  | NA     | NA |
| NM_153027    | FAM218A      | 0.303044070876874 | 0                  | 2.00E-04 | 1        | 0.0012 | 0  | NA     | NA |
| NR_015407    | LOC339535    | 0.303044070876874 | 0                  | 2.00E-04 | 1        | 0.0012 | 0  | NA     | NA |
| NM_173666    | DTWD2        | 0.303044070876874 | 0                  | 2.00E-04 | 1        | 0.0012 | 0  | NA     | NA |
| NM_006248    | PRB2         | 0.396637891867333 | 0.0940481599273058 | 2.00E-04 | 1        | 0.0012 | 0  | NA     | NA |
| NM_018183    | SBNO1        | 0.30213539300318  | 0                  | 2.00E-04 | 1        | 0.0012 | 0  | NA     | NA |
| NM_001167856 | SBNO1        | 0.30213539300318  | 0                  | 2.00E-04 | 1        | 0.0012 | 0  | NA     | NA |
| NM_030904    | OR2T1        | 0.301681054066333 | 0                  | 2.00E-04 | 1        | 0.0012 | 0  | NA     | NA |
| NM_001004127 | ALG11        | 0.301681054066333 | 0                  | 2.00E-04 | 1        | 0.0012 | 0  | NA     | NA |
| NR_036571    | ALG11        | 0.301681054066333 | 0                  | 2.00E-04 | 1        | 0.0012 | 0  | NA     | NA |
| NM_173678    | FAM115C      | 0.301681054066333 | 0                  | 2.00E-04 | 1        | 0.0012 | 0  | NA     | NA |
| NM_006359    | SLC9A6       | 0.301681054066333 | 0                  | 2.00E-04 | 1        | 0.0012 | 0  | NA     | NA |
| NM_001177651 | SLC9A6       | 0.301681054066333 | 0                  | 2.00E-04 | 1        | 0.0012 | 0  | NA     | NA |
| NM_001042537 | SLC9A6       | 0.301681054066333 | 0                  | 4.00E-04 | 1        | 0.0019 | 0  | NA     | NA |
| NM_178450    | MARCH3       | 0.301681054066333 | 0                  | 2.00E-04 | 1        | 0.0012 | 0  | NA     | NA |
| NM_001005466 | OR10G2       | 0.301226715129487 | 0                  | 2.00E-04 | 1        | 0.0012 | 0  | NA     | NA |
| NM_004657    | SDPR         | 0.301226715129487 | 0                  | 2.00E-04 | 1        | 0.0012 | 0  | NA     | NA |
| NM_054023    | SCGB3A2      | 0.30077237619264  | 0                  | 2.00E-04 | 1        | 0.0012 | 0  | NA     | NA |
| NM_006160    | NEUROD2      | 0.30077237619264  | 0                  | 2.00E-04 | 1        | 0.0012 | 0  | NA     | NA |
| NM_000370    | TTPA         | 0.30077237619264  | 0                  | 2.00E-04 | 1        | 0.0012 | 0  | NA     | NA |
| NR_036695    | RPS7P5       | 0.300318037255793 | 0                  | 2.00E-04 | 1        | 0.0012 | 0  | NA     | NA |
| NM_194287    | C14orf166B   | 0.300318037255793 | 0                  | 2.00E-04 | 1        | 0.0012 | 0  | NA     | NA |
| NM_001276373 | USF1         | 0.300318037255793 | 0                  | 2.00E-04 | 1        | 0.0012 | 0  | NA     | NA |
| NM_018402    | IL26         | 0.300318037255793 | 0                  | 2.00E-04 | 1        | 0.0012 | 0  | NA     | NA |
| NR_029411    | LOC100133091 | 0                 | 0.300318037255793  | 1        | 2.00E-04 | NA     | NA | 0.0014 | 0  |
| NM_004651    | USP11        | 0                 | 0.300318037255793  | 1        | 2.00E-04 | NA     | NA | 0.0014 | 0  |
| NM_001271836 | CCDC120      | 0                 | 0.300318037255793  | 1        | 2.00E-04 | NA     | NA | 0.0014 | 0  |
| NR_029193    | SH3RF3-AS1   | 0                 | 0.300318037255793  | 1        | 2.00E-04 | NA     | NA | 0.0014 | 0  |
| NM_001099339 | COMMD7       | 0                 | 0.300318037255793  | 1        | 2.00E-04 | NA     | NA | 0.0014 | 0  |
| NM_053041    | COMMD7       | 0                 | 0.300318037255793  | 1        | 2.00E-04 | NA     | NA | 0.0014 | 0  |
| NM_001146077 | CLDN14       | 0                 | 0.300318037255793  | 1        | 2.00E-04 | NA     | NA | 0.0014 | 0  |
| NM_001114617 | MGAT1        | 0                 | 0.300318037255793  | 1        | 2.00E-04 | NA     | NA | 0.0014 | 0  |
| NM_182493    | MYLK3        | 0                 | 0.30077237619264   | 1        | 2.00E-04 | NA     | NA | 0.0014 | 0  |
| NM_022167    | XYLT2        | 0                 | 0.301226715129487  | 1        | 2.00E-04 | NA     | NA | 0.0014 | 0  |
| NM_033050    | SUCNR1       | 0                 | 0.301226715129487  | 1        | 2.00E-04 | NA     | NA | 0.0014 | 0  |
| NM_001244705 | CSAD         | 0                 | 0.301226715129487  | 1        | 2.00E-04 | NA     | NA | 0.0014 | 0  |
| NM_001282313 | EXOC7        | 0                 | 0.30213539300318   | 1        | 2.00E-04 | NA     | NA | 0.0014 | 0  |

|              |          |                    |                   |   |          |    |    |        |   |
|--------------|----------|--------------------|-------------------|---|----------|----|----|--------|---|
| NM_001145297 | EXOC7    | 0                  | 0.30213539300318  | 1 | 2.00E-04 | NA | NA | 0.0014 | 0 |
| NM_001145298 | EXOC7    | 0                  | 0.30213539300318  | 1 | 2.00E-04 | NA | NA | 0.0014 | 0 |
| NM_001282314 | EXOC7    | 0                  | 0.30213539300318  | 1 | 2.00E-04 | NA | NA | 0.0014 | 0 |
| NM_001013839 | EXOC7    | 0                  | 0.30213539300318  | 1 | 2.00E-04 | NA | NA | 0.0014 | 0 |
| NM_001145299 | EXOC7    | 0                  | 0.30213539300318  | 1 | 2.00E-04 | NA | NA | 0.0014 | 0 |
| NM_015219    | EXOC7    | 0                  | 0.30213539300318  | 1 | 2.00E-04 | NA | NA | 0.0014 | 0 |
| NM_144679    | ENTHD2   | 0                  | 0.30213539300318  | 1 | 2.00E-04 | NA | NA | 0.0014 | 0 |
| NM_001042355 | CYLD     | 0                  | 0.302589731940027 | 1 | 2.00E-04 | NA | NA | 0.0014 | 0 |
| NM_015247    | CYLD     | 0                  | 0.302589731940027 | 1 | 2.00E-04 | NA | NA | 0.0014 | 0 |
| NM_001042412 | CYLD     | 0                  | 0.302589731940027 | 1 | 2.00E-04 | NA | NA | 0.0014 | 0 |
| NM_173483    | CYP4F22  | 0                  | 0.302589731940027 | 1 | 2.00E-04 | NA | NA | 0.0014 | 0 |
| NM_001145134 | CPT1B    | 0                  | 0.302589731940027 | 1 | 2.00E-04 | NA | NA | 0.0014 | 0 |
| NM_001145135 | CPT1B    | 0                  | 0.302589731940027 | 1 | 2.00E-04 | NA | NA | 0.0014 | 0 |
| NM_152245    | CPT1B    | 0                  | 0.302589731940027 | 1 | 2.00E-04 | NA | NA | 0.0014 | 0 |
| NM_001145136 | CPT1B    | 0                  | 0.302589731940027 | 1 | 2.00E-04 | NA | NA | 0.0014 | 0 |
| NR_003187    | NCF1C    | 0                  | 0.302589731940027 | 1 | 2.00E-04 | NA | NA | 0.0014 | 0 |
| NM_194250    | ZNF804A  | 0                  | 0.303044070876874 | 1 | 2.00E-04 | NA | NA | 0.0014 | 0 |
| NM_014450    | SIT1     | 0                  | 0.303044070876874 | 1 | 2.00E-04 | NA | NA | 0.0014 | 0 |
| NM_004791    | ITGBL1   | 0.118582462517038  | 0.422080872330759 | 1 | 2.00E-04 | NA | NA | 0.0014 | 0 |
| NM_001271755 | ITGBL1   | 0.118582462517038  | 0.422080872330759 | 1 | 2.00E-04 | NA | NA | 0.0014 | 0 |
| NM_001271754 | ITGBL1   | 0.118582462517038  | 0.422080872330759 | 1 | 2.00E-04 | NA | NA | 0.0014 | 0 |
| NR_038359    | MGC45922 | 0                  | 0.303498409813721 | 1 | 2.00E-04 | NA | NA | 0.0014 | 0 |
| NM_002491    | NDUFB3   | 0                  | 0.303498409813721 | 1 | 2.00E-04 | NA | NA | 0.0014 | 0 |
| NM_001257102 | NDUFB3   | 0                  | 0.303498409813721 | 1 | 2.00E-04 | NA | NA | 0.0014 | 0 |
| NM_021243    | ABRACL   | 0                  | 0.303498409813721 | 1 | 2.00E-04 | NA | NA | 0.0014 | 0 |
| NM_001042603 | KDM5A    | 0                  | 0.303498409813721 | 1 | 2.00E-04 | NA | NA | 0.0014 | 0 |
| NM_198219    | ING1     | 0                  | 0.303952748750568 | 1 | 2.00E-04 | NA | NA | 0.0014 | 0 |
| NM_198218    | ING1     | 0                  | 0.303952748750568 | 1 | 2.00E-04 | NA | NA | 0.0014 | 0 |
| NM_152353    | CLDND2   | 0                  | 0.303952748750568 | 1 | 2.00E-04 | NA | NA | 0.0014 | 0 |
| NM_001171171 | CX3CR1   | 0                  | 0.303952748750568 | 1 | 2.00E-04 | NA | NA | 0.0014 | 0 |
| NR_003003    | SCARNA17 | 0                  | 0.304407087687415 | 1 | 2.00E-04 | NA | NA | 0.0014 | 0 |
| NM_001127443 | CD36     | 0                  | 0.304407087687415 | 1 | 2.00E-04 | NA | NA | 0.0014 | 0 |
| NM_001128620 | PAK1     | 0                  | 0.304407087687415 | 1 | 2.00E-04 | NA | NA | 0.0014 | 0 |
| NM_002576    | PAK1     | 0                  | 0.304407087687415 | 1 | 2.00E-04 | NA | NA | 0.0014 | 0 |
| NM_007046    | EMILIN1  | 0.0885960926851431 | 0.393457519309405 | 1 | 2.00E-04 | NA | NA | 0.0014 | 0 |
| NM_052903    | TUBGCP5  | 0                  | 0.304861426624262 | 1 | 2.00E-04 | NA | NA | 0.0014 | 0 |
| NM_001102610 | TUBGCP5  | 0                  | 0.304861426624262 | 1 | 2.00E-04 | NA | NA | 0.0014 | 0 |
| NM_032476    | MRPS6    | 0                  | 0.304861426624262 | 1 | 2.00E-04 | NA | NA | 0.0014 | 0 |
| NM_000726    | CACNB4   | 0                  | 0.305315765561109 | 1 | 2.00E-04 | NA | NA | 0.0014 | 0 |
| NM_001145798 | CACNB4   | 0                  | 0.305315765561109 | 1 | 2.00E-04 | NA | NA | 0.0014 | 0 |
| NM_205846    | PRELID2  | 0                  | 0.305315765561109 | 1 | 2.00E-04 | NA | NA | 0.0014 | 0 |

|              |                   |                    |                   |   |          |    |    |        |   |
|--------------|-------------------|--------------------|-------------------|---|----------|----|----|--------|---|
| NM_138492    | <i>PRELID2</i>    | 0                  | 0.305315765561109 | 1 | 2.00E-04 | NA | NA | 0.0014 | 0 |
| NM_182960    | <i>PRELID2</i>    | 0                  | 0.305315765561109 | 1 | 2.00E-04 | NA | NA | 0.0014 | 0 |
| NM_024667    | <i>VPS37B</i>     | 0                  | 0.306224443434802 | 1 | 2.00E-04 | NA | NA | 0.0014 | 0 |
| NM_006045    | <i>ATP9A</i>      | 0                  | 0.306224443434802 | 1 | 2.00E-04 | NA | NA | 0.0014 | 0 |
| NM_002987    | <i>CCL17</i>      | 0                  | 0.306678782371649 | 1 | 2.00E-04 | NA | NA | 0.0014 | 0 |
| NM_001127649 | <i>PEX26</i>      | 0                  | 0.306678782371649 | 1 | 2.00E-04 | NA | NA | 0.0014 | 0 |
| NM_005433    | <i>YES1</i>       | 0                  | 0.306678782371649 | 1 | 2.00E-04 | NA | NA | 0.0014 | 0 |
| NM_004623    | <i>TTC4</i>       | 0                  | 0.307133121308496 | 1 | 2.00E-04 | NA | NA | 0.0014 | 0 |
| NM_001145734 | <i>CDC20B</i>     | 0                  | 0.307133121308496 | 1 | 2.00E-04 | NA | NA | 0.0014 | 0 |
| NM_001170402 | <i>CDC20B</i>     | 0                  | 0.307133121308496 | 1 | 2.00E-04 | NA | NA | 0.0014 | 0 |
| NM_152623    | <i>CDC20B</i>     | 0                  | 0.307133121308496 | 1 | 2.00E-04 | NA | NA | 0.0014 | 0 |
| NR_073033    | <i>LATS1</i>      | 0                  | 0.307133121308496 | 1 | 2.00E-04 | NA | NA | 0.0014 | 0 |
| NR_037161    | <i>ZNF582-AS1</i> | 0.0549750113584734 | 0.362562471603816 | 1 | 2.00E-04 | NA | NA | 0.0014 | 0 |
| NR_037159    | <i>ZNF582-AS1</i> | 0.0549750113584734 | 0.362562471603816 | 1 | 2.00E-04 | NA | NA | 0.0014 | 0 |
| NR_037160    | <i>ZNF582-AS1</i> | 0.0549750113584734 | 0.362562471603816 | 1 | 2.00E-04 | NA | NA | 0.0014 | 0 |
| NM_014648    | <i>DZIP3</i>      | 0                  | 0.307587460245343 | 1 | 2.00E-04 | NA | NA | 0.0014 | 0 |
| NM_000586    | <i>IL2</i>        | 0                  | 0.307587460245343 | 1 | 2.00E-04 | NA | NA | 0.0014 | 0 |
| NM_001278304 | <i>DIABLO</i>     | 0.0676965015901863 | 0.375738300772376 | 1 | 2.00E-04 | NA | NA | 0.0014 | 0 |
| NM_007187    | <i>WBP4</i>       | 0                  | 0.30804179918219  | 1 | 2.00E-04 | NA | NA | 0.0014 | 0 |
| NM_001130406 | <i>PRR20D</i>     | 0                  | 0.30804179918219  | 1 | 2.00E-04 | NA | NA | 0.0014 | 0 |
| NM_000805    | <i>GAST</i>       | 0                  | 0.30804179918219  | 1 | 2.00E-04 | NA | NA | 0.0014 | 0 |
| NM_004274    | <i>AKAP6</i>      | 0                  | 0.308496138119037 | 1 | 2.00E-04 | NA | NA | 0.0014 | 0 |
| NM_001040022 | <i>SIRPA</i>      | 0                  | 0.308496138119037 | 1 | 2.00E-04 | NA | NA | 0.0014 | 0 |
| NR_049820    | <i>MIR5188</i>    | 0                  | 0.308950477055884 | 1 | 2.00E-04 | NA | NA | 0.0014 | 0 |
| NM_022120    | <i>OXCT2</i>      | 0                  | 0.308950477055884 | 1 | 2.00E-04 | NA | NA | 0.0014 | 0 |
| NM_174944    | <i>TSSK4</i>      | 0                  | 0.309404815992731 | 1 | 2.00E-04 | NA | NA | 0.0014 | 0 |
| NM_001184739 | <i>TSSK4</i>      | 0                  | 0.309404815992731 | 1 | 2.00E-04 | NA | NA | 0.0014 | 0 |
| NM_001168389 | <i>CITED2</i>     | 0                  | 0.309404815992731 | 1 | 2.00E-04 | NA | NA | 0.0014 | 0 |
| NM_001099666 | <i>PTAR1</i>      | 0                  | 0.309404815992731 | 1 | 2.00E-04 | NA | NA | 0.0014 | 0 |
| NM_001164586 | <i>IGFN1</i>      | 0                  | 0.309859154929577 | 1 | 2.00E-04 | NA | NA | 0.0014 | 0 |
| NR_037415    | <i>MIR3620</i>    | 0                  | 0.309859154929577 | 1 | 2.00E-04 | NA | NA | 0.0014 | 0 |
| NM_016436    | <i>PHF20</i>      | 0                  | 0.309859154929577 | 1 | 2.00E-04 | NA | NA | 0.0014 | 0 |
| NM_004953    | <i>EIF4G1</i>     | 0                  | 0.309859154929577 | 1 | 2.00E-04 | NA | NA | 0.0014 | 0 |
| NM_172337    | <i>OTX2</i>       | 0                  | 0.310313493866424 | 1 | 2.00E-04 | NA | NA | 0.0014 | 0 |
| NM_001270525 | <i>OTX2</i>       | 0                  | 0.310313493866424 | 1 | 2.00E-04 | NA | NA | 0.0014 | 0 |
| NR_073036    | <i>OTX2</i>       | 0                  | 0.310313493866424 | 1 | 2.00E-04 | NA | NA | 0.0014 | 0 |
| NR_002922    | <i>SNORA13</i>    | 0.0872330758746025 | 0.397546569741027 | 1 | 2.00E-04 | NA | NA | 0.0014 | 0 |
| NM_001166703 | <i>FAM104B</i>    | 0.0113584734211722 | 0.321671967287597 | 1 | 2.00E-04 | NA | NA | 0.0014 | 0 |
| NM_015188    | <i>TBC1D12</i>    | 0                  | 0.310767832803271 | 1 | 2.00E-04 | NA | NA | 0.0014 | 0 |
| NM_183233    | <i>SLC22A18</i>   | 0                  | 0.310767832803271 | 1 | 2.00E-04 | NA | NA | 0.0014 | 0 |
| NM_000364    | <i>TNNT2</i>      | 0                  | 0.310767832803271 | 1 | 2.00E-04 | NA | NA | 0.0014 | 0 |

|              |              |   |                   |   |          |    |    |        |   |
|--------------|--------------|---|-------------------|---|----------|----|----|--------|---|
| NM_001001430 | TNNT2        | 0 | 0.310767832803271 | 1 | 2.00E-04 | NA | NA | 0.0014 | 0 |
| NM_001276347 | TNNT2        | 0 | 0.310767832803271 | 1 | 2.00E-04 | NA | NA | 0.0014 | 0 |
| NM_001001431 | TNNT2        | 0 | 0.310767832803271 | 1 | 2.00E-04 | NA | NA | 0.0014 | 0 |
| NM_001276345 | TNNT2        | 0 | 0.310767832803271 | 1 | 2.00E-04 | NA | NA | 0.0014 | 0 |
| NM_001001432 | TNNT2        | 0 | 0.310767832803271 | 1 | 2.00E-04 | NA | NA | 0.0014 | 0 |
| NM_001276346 | TNNT2        | 0 | 0.310767832803271 | 1 | 2.00E-04 | NA | NA | 0.0014 | 0 |
| NM_033445    | HIST3H2A     | 0 | 0.310767832803271 | 1 | 2.00E-04 | NA | NA | 0.0014 | 0 |
| NM_005001    | NDUFA7       | 0 | 0.310767832803271 | 1 | 2.00E-04 | NA | NA | 0.0014 | 0 |
| NM_001167823 | BLCAP        | 0 | 0.310767832803271 | 1 | 2.00E-04 | NA | NA | 0.0014 | 0 |
| NM_015942    | MTERFD1      | 0 | 0.310767832803271 | 1 | 2.00E-04 | NA | NA | 0.0014 | 0 |
| NR_103774    | LOC100289580 | 0 | 0.311222171740118 | 1 | 2.00E-04 | NA | NA | 0.0014 | 0 |
| NM_177939    | P4HTM        | 0 | 0.311222171740118 | 1 | 2.00E-04 | NA | NA | 0.0014 | 0 |
| NM_177938    | P4HTM        | 0 | 0.311222171740118 | 1 | 2.00E-04 | NA | NA | 0.0014 | 0 |
| NM_003432    | ZNF131       | 0 | 0.311222171740118 | 1 | 2.00E-04 | NA | NA | 0.0014 | 0 |
| NM_001843    | CNTN1        | 0 | 0.311676510676965 | 1 | 2.00E-04 | NA | NA | 0.0014 | 0 |
| NM_001256063 | CNTN1        | 0 | 0.311676510676965 | 1 | 2.00E-04 | NA | NA | 0.0014 | 0 |
| NM_000303    | PMM2         | 0 | 0.311676510676965 | 1 | 2.00E-04 | NA | NA | 0.0014 | 0 |
| NM_182626    | C2orf48      | 0 | 0.311676510676965 | 1 | 2.00E-04 | NA | NA | 0.0014 | 0 |
| NM_032504    | UNC80        | 0 | 0.311676510676965 | 1 | 2.00E-04 | NA | NA | 0.0014 | 0 |
| NM_182587    | UNC80        | 0 | 0.311676510676965 | 1 | 2.00E-04 | NA | NA | 0.0014 | 0 |
| NM_002270    | TNPO1        | 0 | 0.311676510676965 | 1 | 2.00E-04 | NA | NA | 0.0014 | 0 |
| NR_003081    | GSTTP1       | 0 | 0.311676510676965 | 1 | 2.00E-04 | NA | NA | 0.0014 | 0 |
| NM_003451    | ZNF177       | 0 | 0.312130849613812 | 1 | 2.00E-04 | NA | NA | 0.0014 | 0 |
| NR_024249    | FAM86C2P     | 0 | 0.312130849613812 | 1 | 2.00E-04 | NA | NA | 0.0014 | 0 |
| NM_001034833 | NHP2         | 0 | 0.312130849613812 | 1 | 2.00E-04 | NA | NA | 0.0014 | 0 |
| NM_017838    | NHP2         | 0 | 0.312130849613812 | 1 | 2.00E-04 | NA | NA | 0.0014 | 0 |
| NM_024693    | ECHDC3       | 0 | 0.312585188550659 | 1 | 2.00E-04 | NA | NA | 0.0014 | 0 |
| NM_006183    | NTS          | 0 | 0.312585188550659 | 1 | 2.00E-04 | NA | NA | 0.0014 | 0 |
| NM_001950    | E2F4         | 0 | 0.312585188550659 | 1 | 2.00E-04 | NA | NA | 0.0014 | 0 |
| NM_016568    | RXFP3        | 0 | 0.312585188550659 | 1 | 2.00E-04 | NA | NA | 0.0014 | 0 |
| NR_039783    | MIR4640      | 0 | 0.312585188550659 | 1 | 2.00E-04 | NA | NA | 0.0014 | 0 |
| NM_001136160 | MCMDC2       | 0 | 0.312585188550659 | 1 | 2.00E-04 | NA | NA | 0.0014 | 0 |
| NM_020064    | BARHL1       | 0 | 0.312585188550659 | 1 | 2.00E-04 | NA | NA | 0.0014 | 0 |
| NR_003505    | PPP4R1L      | 0 | 0.312585188550659 | 1 | 2.00E-04 | NA | NA | 0.0014 | 0 |
| NM_004745    | DLGAP2       | 0 | 0.313039527487506 | 1 | 2.00E-04 | NA | NA | 0.0014 | 0 |
| NM_001277161 | DLGAP2       | 0 | 0.313039527487506 | 1 | 2.00E-04 | NA | NA | 0.0014 | 0 |
| NM_003000    | SDHB         | 0 | 0.313039527487506 | 1 | 2.00E-04 | NA | NA | 0.0014 | 0 |
| NM_001879    | MASP1        | 0 | 0.313039527487506 | 1 | 2.00E-04 | NA | NA | 0.0014 | 0 |
| NM_001031849 | MASP1        | 0 | 0.313039527487506 | 1 | 2.00E-04 | NA | NA | 0.0014 | 0 |
| NM_139125    | MASP1        | 0 | 0.313039527487506 | 1 | 2.00E-04 | NA | NA | 0.0014 | 0 |
| NR_033519    | MASP1        | 0 | 0.313039527487506 | 1 | 2.00E-04 | NA | NA | 0.0014 | 0 |



|              |                        |   |                   |   |          |    |    |        |   |
|--------------|------------------------|---|-------------------|---|----------|----|----|--------|---|
| NM_001001550 | <i>GRB10</i>           | 0 | 0.313039527487506 | 1 | 2.00E-04 | NA | NA | 0.0014 | 0 |
| NR_024515    | <i>APLP2</i>           | 0 | 0.313493866424353 | 1 | 2.00E-04 | NA | NA | 0.0014 | 0 |
| NR_024516    | <i>APLP2</i>           | 0 | 0.313493866424353 | 1 | 2.00E-04 | NA | NA | 0.0014 | 0 |
| NM_001142278 | <i>APLP2</i>           | 0 | 0.313493866424353 | 1 | 2.00E-04 | NA | NA | 0.0014 | 0 |
| NM_001642    | <i>APLP2</i>           | 0 | 0.313493866424353 | 1 | 2.00E-04 | NA | NA | 0.0014 | 0 |
| NM_001142277 | <i>APLP2</i>           | 0 | 0.313493866424353 | 1 | 2.00E-04 | NA | NA | 0.0014 | 0 |
| NM_001142276 | <i>APLP2</i>           | 0 | 0.313493866424353 | 1 | 2.00E-04 | NA | NA | 0.0014 | 0 |
| NM_003881    | <i>WISP2</i>           | 0 | 0.313493866424353 | 1 | 2.00E-04 | NA | NA | 0.0014 | 0 |
| NM_079422    | <i>MYL1</i>            | 0 | 0.313493866424353 | 1 | 2.00E-04 | NA | NA | 0.0014 | 0 |
| NM_001099756 | <i>SYBU</i>            | 0 | 0.313493866424353 | 1 | 2.00E-04 | NA | NA | 0.0014 | 0 |
| NM_012068    | <i>ATF5</i>            | 0 | 0.313948205361199 | 1 | 2.00E-04 | NA | NA | 0.0014 | 0 |
| NM_001193646 | <i>ATF5</i>            | 0 | 0.313948205361199 | 1 | 2.00E-04 | NA | NA | 0.0014 | 0 |
| NM_000910    | <i>NPY2R</i>           | 0 | 0.314402544298046 | 1 | 2.00E-04 | NA | NA | 0.0014 | 0 |
| NM_015346    | <i>ZFYVE26</i>         | 0 | 0.314402544298046 | 1 | 2.00E-04 | NA | NA | 0.0014 | 0 |
| NM_001004333 | <i>RNASEK</i>          | 0 | 0.314856883234893 | 1 | 2.00E-04 | NA | NA | 0.0014 | 0 |
| NR_037716    | <i>RNASEK</i>          | 0 | 0.314856883234893 | 1 | 2.00E-04 | NA | NA | 0.0014 | 0 |
| NR_037715    | <i>RNASEK</i>          | 0 | 0.314856883234893 | 1 | 2.00E-04 | NA | NA | 0.0014 | 0 |
| NR_037717    | <i>RNASEK-C17orf49</i> | 0 | 0.314856883234893 | 1 | 2.00E-04 | NA | NA | 0.0014 | 0 |
| NR_027695    | <i>DSCR10</i>          | 0 | 0.314856883234893 | 1 | 2.00E-04 | NA | NA | 0.0014 | 0 |
| NM_000557    | <i>GDF5</i>            | 0 | 0.314856883234893 | 1 | 2.00E-04 | NA | NA | 0.0014 | 0 |
| NM_004260    | <i>RECQL4</i>          | 0 | 0.314856883234893 | 1 | 2.00E-04 | NA | NA | 0.0014 | 0 |
| NM_001278245 | <i>ZFAND5</i>          | 0 | 0.314856883234893 | 1 | 2.00E-04 | NA | NA | 0.0014 | 0 |
| NM_001278244 | <i>ZFAND5</i>          | 0 | 0.314856883234893 | 1 | 2.00E-04 | NA | NA | 0.0014 | 0 |
| NM_001278243 | <i>ZFAND5</i>          | 0 | 0.314856883234893 | 1 | 2.00E-04 | NA | NA | 0.0014 | 0 |
| NM_001160233 | <i>ATP1A1</i>          | 0 | 0.31531122217174  | 1 | 2.00E-04 | NA | NA | 0.0014 | 0 |
| NM_213656    | <i>KRT39</i>           | 0 | 0.31531122217174  | 1 | 2.00E-04 | NA | NA | 0.0014 | 0 |
| NM_001040431 | <i>COA3</i>            | 0 | 0.31531122217174  | 1 | 2.00E-04 | NA | NA | 0.0014 | 0 |
| NM_004943    | <i>DMWD</i>            | 0 | 0.31531122217174  | 1 | 2.00E-04 | NA | NA | 0.0014 | 0 |
| NM_145265    | <i>CCDC127</i>         | 0 | 0.31531122217174  | 1 | 2.00E-04 | NA | NA | 0.0014 | 0 |
| NM_006407    | <i>ARL6IP5</i>         | 0 | 0.315765561108587 | 1 | 2.00E-04 | NA | NA | 0.0014 | 0 |
| NM_001167989 | <i>PQBP1</i>           | 0 | 0.315765561108587 | 1 | 2.00E-04 | NA | NA | 0.0014 | 0 |
| NM_144495    | <i>PQBP1</i>           | 0 | 0.315765561108587 | 1 | 2.00E-04 | NA | NA | 0.0014 | 0 |
| NM_001032382 | <i>PQBP1</i>           | 0 | 0.315765561108587 | 1 | 2.00E-04 | NA | NA | 0.0014 | 0 |
| NM_001032381 | <i>PQBP1</i>           | 0 | 0.315765561108587 | 1 | 2.00E-04 | NA | NA | 0.0014 | 0 |
| NM_001032383 | <i>PQBP1</i>           | 0 | 0.315765561108587 | 1 | 2.00E-04 | NA | NA | 0.0014 | 0 |
| NM_032779    | <i>CCDC142</i>         | 0 | 0.315765561108587 | 1 | 2.00E-04 | NA | NA | 0.0014 | 0 |
| NM_001034850 | <i>FAM134B</i>         | 0 | 0.315765561108587 | 1 | 2.00E-04 | NA | NA | 0.0014 | 0 |
| NM_000483    | <i>APOC2</i>           | 0 | 0.316219900045434 | 1 | 2.00E-04 | NA | NA | 0.0014 | 0 |
| NM_001040126 | <i>PQLC2</i>           | 0 | 0.316674238982281 | 1 | 2.00E-04 | NA | NA | 0.0014 | 0 |
| NM_001040125 | <i>PQLC2</i>           | 0 | 0.316674238982281 | 1 | 2.00E-04 | NA | NA | 0.0014 | 0 |
| NM_017765    | <i>PQLC2</i>           | 0 | 0.316674238982281 | 1 | 2.00E-04 | NA | NA | 0.0014 | 0 |

|              |           |   |                   |        |          |    |    |        |   |
|--------------|-----------|---|-------------------|--------|----------|----|----|--------|---|
| NM_001145036 | COG2      | 0 | 0.316674238982281 | 1      | 2.00E-04 | NA | NA | 0.0014 | 0 |
| NM_007357    | COG2      | 0 | 0.316674238982281 | 1      | 2.00E-04 | NA | NA | 0.0014 | 0 |
| NM_018381    | C19orf66  | 0 | 0.316674238982281 | 1      | 2.00E-04 | NA | NA | 0.0014 | 0 |
| NR_026926    | LOC151174 | 0 | 0.316674238982281 | 1      | 2.00E-04 | NA | NA | 0.0014 | 0 |
| NR_026925    | LOC151174 | 0 | 0.316674238982281 | 1      | 2.00E-04 | NA | NA | 0.0014 | 0 |
| NR_026860    | LINC00473 | 0 | 0.316674238982281 | 1      | 2.00E-04 | NA | NA | 0.0014 | 0 |
| NR_026861    | LINC00473 | 0 | 0.316674238982281 | 1      | 2.00E-04 | NA | NA | 0.0014 | 0 |
| NM_005298    | GPR25     | 0 | 0.317128577919128 | 1      | 2.00E-04 | NA | NA | 0.0014 | 0 |
| NM_001278591 | LIAS      | 0 | 0.317128577919128 | 1      | 2.00E-04 | NA | NA | 0.0014 | 0 |
| NM_001278590 | LIAS      | 0 | 0.317128577919128 | 1      | 2.00E-04 | NA | NA | 0.0014 | 0 |
| NM_194451    | LIAS      | 0 | 0.317128577919128 | 1      | 2.00E-04 | NA | NA | 0.0014 | 0 |
| NM_006859    | LIAS      | 0 | 0.317128577919128 | 1      | 2.00E-04 | NA | NA | 0.0014 | 0 |
| NM_001278592 | LIAS      | 0 | 0.317128577919128 | 1      | 2.00E-04 | NA | NA | 0.0014 | 0 |
| NM_153436    | ODF2      | 0 | 0.317128577919128 | 1      | 2.00E-04 | NA | NA | 0.0014 | 0 |
| NM_173495    | PTCHD1    | 0 | 0.317128577919128 | 1      | 2.00E-04 | NA | NA | 0.0014 | 0 |
| NM_032345    | WIBG      | 0 | 0.317128577919128 | 0.9998 | 6.00E-04 | NA | NA | 0.0029 | 0 |
| NM_001271952 | TPGS2     | 0 | 0.317128577919128 | 1      | 2.00E-04 | NA | NA | 0.0014 | 0 |
| NM_001271956 | TPGS2     | 0 | 0.317128577919128 | 1      | 2.00E-04 | NA | NA | 0.0014 | 0 |
| NM_001271950 | TPGS2     | 0 | 0.317128577919128 | 1      | 2.00E-04 | NA | NA | 0.0014 | 0 |
| NM_001271951 | TPGS2     | 0 | 0.317128577919128 | 1      | 2.00E-04 | NA | NA | 0.0014 | 0 |
| NM_001271949 | TPGS2     | 0 | 0.317128577919128 | 1      | 2.00E-04 | NA | NA | 0.0014 | 0 |
| NM_015476    | TPGS2     | 0 | 0.317128577919128 | 1      | 2.00E-04 | NA | NA | 0.0014 | 0 |
| NM_001271955 | TPGS2     | 0 | 0.317128577919128 | 1      | 2.00E-04 | NA | NA | 0.0014 | 0 |
| NM_001271954 | TPGS2     | 0 | 0.317128577919128 | 1      | 2.00E-04 | NA | NA | 0.0014 | 0 |
| NM_001271953 | TPGS2     | 0 | 0.317128577919128 | 1      | 2.00E-04 | NA | NA | 0.0014 | 0 |
| NM_001256891 | SRI       | 0 | 0.317128577919128 | 1      | 2.00E-04 | NA | NA | 0.0014 | 0 |
| NM_003130    | SRI       | 0 | 0.317128577919128 | 1      | 2.00E-04 | NA | NA | 0.0014 | 0 |
| NM_001113206 | TSTD1     | 0 | 0.317582916855975 | 1      | 2.00E-04 | NA | NA | 0.0014 | 0 |
| NM_001113205 | TSTD1     | 0 | 0.317582916855975 | 1      | 2.00E-04 | NA | NA | 0.0014 | 0 |
| NM_001113207 | TSTD1     | 0 | 0.317582916855975 | 1      | 2.00E-04 | NA | NA | 0.0014 | 0 |
| NM_001018044 | MAP3K19   | 0 | 0.317582916855975 | 1      | 2.00E-04 | NA | NA | 0.0014 | 0 |
| NM_001018046 | MAP3K19   | 0 | 0.317582916855975 | 1      | 2.00E-04 | NA | NA | 0.0014 | 0 |
| NM_001018047 | MAP3K19   | 0 | 0.317582916855975 | 1      | 2.00E-04 | NA | NA | 0.0014 | 0 |
| NM_001282883 | MAP3K19   | 0 | 0.317582916855975 | 1      | 2.00E-04 | NA | NA | 0.0014 | 0 |
| NM_025052    | MAP3K19   | 0 | 0.317582916855975 | 1      | 2.00E-04 | NA | NA | 0.0014 | 0 |
| NM_001130678 | EIF4E     | 0 | 0.317582916855975 | 1      | 2.00E-04 | NA | NA | 0.0014 | 0 |
| NM_080840    | PTPRA     | 0 | 0.318037255792821 | 1      | 2.00E-04 | NA | NA | 0.0014 | 0 |
| NM_005460    | SNCAIP    | 0 | 0.318037255792821 | 1      | 2.00E-04 | NA | NA | 0.0014 | 0 |
| NM_001242935 | SNCAIP    | 0 | 0.318037255792821 | 1      | 2.00E-04 | NA | NA | 0.0014 | 0 |
| NM_001135676 | SMIM19    | 0 | 0.318037255792821 | 1      | 2.00E-04 | NA | NA | 0.0014 | 0 |
| NM_001136273 | ZFP92     | 0 | 0.318037255792821 | 1      | 2.00E-04 | NA | NA | 0.0014 | 0 |

|              |         |                   |                   |        |          |    |    |        |        |
|--------------|---------|-------------------|-------------------|--------|----------|----|----|--------|--------|
| NM_004200    | SYT7    | 0                 | 0.318037255792821 | 1      | 2.00E-04 | NA | NA | 0.0014 | 0      |
| NM_001252065 | SYT7    | 0                 | 0.318037255792821 | 1      | 2.00E-04 | NA | NA | 0.0014 | 0      |
| NM_001201564 | PLRG1   | 0                 | 0.318491594729668 | 1      | 2.00E-04 | NA | NA | 0.0014 | 0      |
| NM_002669    | PLRG1   | 0                 | 0.318491594729668 | 1      | 2.00E-04 | NA | NA | 0.0014 | 0      |
| NM_001001994 | GPM6B   | 0                 | 0.318491594729668 | 1      | 2.00E-04 | NA | NA | 0.0014 | 0      |
| NM_033518    | SLC38A5 | 0.142208087233076 | 0.461154020899591 | 1      | 2.00E-04 | NA | NA | 0.0014 | 0      |
| NM_001278485 | ANAPC15 | 0                 | 0.318945933666515 | 1      | 2.00E-04 | NA | NA | 0.0014 | 0      |
| NM_014042    | ANAPC15 | 0                 | 0.318945933666515 | 1      | 2.00E-04 | NA | NA | 0.0014 | 0      |
| NM_001278486 | ANAPC15 | 0                 | 0.318945933666515 | 1      | 2.00E-04 | NA | NA | 0.0014 | 0      |
| NM_001278489 | ANAPC15 | 0                 | 0.318945933666515 | 1      | 2.00E-04 | NA | NA | 0.0014 | 0      |
| NM_001278488 | ANAPC15 | 0                 | 0.318945933666515 | 1      | 2.00E-04 | NA | NA | 0.0014 | 0      |
| NM_001278487 | ANAPC15 | 0                 | 0.318945933666515 | 1      | 2.00E-04 | NA | NA | 0.0014 | 0      |
| NM_001278494 | ANAPC15 | 0                 | 0.318945933666515 | 1      | 2.00E-04 | NA | NA | 0.0014 | 0      |
| NM_001278493 | ANAPC15 | 0                 | 0.318945933666515 | 1      | 2.00E-04 | NA | NA | 0.0014 | 0      |
| NM_001278492 | ANAPC15 | 0                 | 0.318945933666515 | 1      | 2.00E-04 | NA | NA | 0.0014 | 0      |
| NM_001278491 | ANAPC15 | 0                 | 0.318945933666515 | 1      | 2.00E-04 | NA | NA | 0.0014 | 0      |
| NM_001278490 | ANAPC15 | 0                 | 0.318945933666515 | 1      | 2.00E-04 | NA | NA | 0.0014 | 0      |
| NM_080914    | ASGR2   | 0                 | 0.318945933666515 | 1      | 2.00E-04 | NA | NA | 0.0014 | 0      |
| NM_001145670 | SORBS2  | 0                 | 0.318945933666515 | 1      | 2.00E-04 | NA | NA | 0.0014 | 0      |
| NM_003603    | SORBS2  | 0                 | 0.318945933666515 | 1      | 2.00E-04 | NA | NA | 0.0014 | 0      |
| NM_178171    | GSDMA   | 0                 | 0.319400272603362 | 1      | 2.00E-04 | NA | NA | 0.0014 | 0      |
| NM_003665    | FCN3    | 0                 | 0.319400272603362 | 1      | 2.00E-04 | NA | NA | 0.0014 | 0      |
| NM_173452    | FCN3    | 0                 | 0.319400272603362 | 1      | 2.00E-04 | NA | NA | 0.0014 | 0      |
| NM_001243194 | INPP5F  | 0                 | 0.319854611540209 | 1      | 2.00E-04 | NA | NA | 0.0014 | 0      |
| NM_014901    | RNF44   | 0                 | 0.319854611540209 | 1      | 2.00E-04 | NA | NA | 0.0014 | 0      |
| NM_173488    | SLCO6A1 | 0                 | 0.320308950477056 | 0.9472 | 0.0532   | NA | NA | 0.1296 | 0.0039 |
| NM_015302    | HAUS5   | 0                 | 0.320763289413903 | 1      | 2.00E-04 | NA | NA | 0.0014 | 0      |
| NM_001033561 | PHF12   | 0                 | 0.320763289413903 | 1      | 2.00E-04 | NA | NA | 0.0014 | 0      |
| NM_020889    | PHF12   | 0                 | 0.320763289413903 | 1      | 2.00E-04 | NA | NA | 0.0014 | 0      |
| NM_001244962 | FRMD3   | 0                 | 0.320763289413903 | 1      | 2.00E-04 | NA | NA | 0.0014 | 0      |
| NR_002327    | SNORA10 | 0                 | 0.32121762835075  | 1      | 2.00E-04 | NA | NA | 0.0014 | 0      |
| NM_020448    | NIPAL3  | 0                 | 0.321671967287597 | 1      | 2.00E-04 | NA | NA | 0.0014 | 0      |
| NM_138639    | BCL2L12 | 0                 | 0.322126306224443 | 1      | 2.00E-04 | NA | NA | 0.0014 | 0      |
| NM_001040668 | BCL2L12 | 0                 | 0.322126306224443 | 1      | 2.00E-04 | NA | NA | 0.0014 | 0      |
| NM_001282516 | BCL2L12 | 0                 | 0.322126306224443 | 1      | 2.00E-04 | NA | NA | 0.0014 | 0      |
| NM_001282517 | BCL2L12 | 0                 | 0.322126306224443 | 1      | 2.00E-04 | NA | NA | 0.0014 | 0      |
| NM_001282519 | BCL2L12 | 0                 | 0.322126306224443 | 1      | 2.00E-04 | NA | NA | 0.0014 | 0      |
| NM_001282520 | BCL2L12 | 0                 | 0.322126306224443 | 1      | 2.00E-04 | NA | NA | 0.0014 | 0      |
| NM_001282521 | BCL2L12 | 0                 | 0.322126306224443 | 1      | 2.00E-04 | NA | NA | 0.0014 | 0      |
| NR_104200    | BCL2L12 | 0                 | 0.322126306224443 | 1      | 2.00E-04 | NA | NA | 0.0014 | 0      |
| NR_104201    | BCL2L12 | 0                 | 0.322126306224443 | 1      | 2.00E-04 | NA | NA | 0.0014 | 0      |

|              |           |                    |                   |       |          |    |    |        |          |
|--------------|-----------|--------------------|-------------------|-------|----------|----|----|--------|----------|
| NR_104202    | BCL2L12   | 0                  | 0.322126306224443 | 1     | 2.00E-04 | NA | NA | 0.0014 | 0        |
| NR_104203    | BCL2L12   | 0                  | 0.322126306224443 | 1     | 2.00E-04 | NA | NA | 0.0014 | 0        |
| NR_104204    | BCL2L12   | 0                  | 0.322126306224443 | 1     | 4.00E-04 | NA | NA | 0.0029 | 0        |
| NR_104205    | BCL2L12   | 0                  | 0.322126306224443 | 1     | 2.00E-04 | NA | NA | 0.0014 | 0        |
| NM_001199013 | STPG1     | 0                  | 0.322126306224443 | 1     | 2.00E-04 | NA | NA | 0.0014 | 0        |
| NM_001199014 | STPG1     | 0                  | 0.322126306224443 | 1     | 2.00E-04 | NA | NA | 0.0014 | 0        |
| NM_178122    | STPG1     | 0                  | 0.322126306224443 | 1     | 2.00E-04 | NA | NA | 0.0014 | 0        |
| NM_016474    | CCDC174   | 0                  | 0.32258064516129  | 1     | 2.00E-04 | NA | NA | 0.0014 | 0        |
| NM_153449    | SLC2A14   | 0                  | 0.32258064516129  | 1     | 2.00E-04 | NA | NA | 0.0014 | 0        |
| NM_014804    | KIAA0753  | 0                  | 0.32258064516129  | 1     | 2.00E-04 | NA | NA | 0.0014 | 0        |
| NM_001197294 | DPYSL3    | 0                  | 0.32258064516129  | 0.999 | 0.0012   | NA | NA | 0.0091 | 1.00E-04 |
| NR_077247    | RPS18P9   | 0                  | 0.323034984098137 | 1     | 2.00E-04 | NA | NA | 0.0014 | 0        |
| NM_001145101 | BTBD18    | 0                  | 0.323034984098137 | 1     | 2.00E-04 | NA | NA | 0.0014 | 0        |
| NR_040042    | DACT3-AS1 | 0                  | 0.323489323034984 | 1     | 2.00E-04 | NA | NA | 0.0014 | 0        |
| NM_012156    | EPB41L1   | 0                  | 0.323489323034984 | 1     | 2.00E-04 | NA | NA | 0.0014 | 0        |
| NM_020873    | LRRN1     | 0                  | 0.323489323034984 | 1     | 2.00E-04 | NA | NA | 0.0014 | 0        |
| NM_001282631 | ARSE      | 0.0926851431167651 | 0.416628805088596 | 1     | 2.00E-04 | NA | NA | 0.0014 | 0        |
| NM_001004304 | ZNF740    | 0                  | 0.323943661971831 | 1     | 2.00E-04 | NA | NA | 0.0014 | 0        |
| NM_001167990 | PQBP1     | 0                  | 0.323943661971831 | 1     | 2.00E-04 | NA | NA | 0.0014 | 0        |
| NM_178311    | GGTLC1    | 0                  | 0.323943661971831 | 1     | 2.00E-04 | NA | NA | 0.0014 | 0        |
| NM_001164738 | CALCR     | 0                  | 0.323943661971831 | 1     | 2.00E-04 | NA | NA | 0.0014 | 0        |
| NM_182594    | ZNF454    | 0                  | 0.324398000908678 | 1     | 2.00E-04 | NA | NA | 0.0014 | 0        |
| NM_001178090 | ZNF454    | 0                  | 0.324398000908678 | 1     | 2.00E-04 | NA | NA | 0.0014 | 0        |
| NM_001178089 | ZNF454    | 0                  | 0.324398000908678 | 1     | 2.00E-04 | NA | NA | 0.0014 | 0        |
| NM_145064    | STAC3     | 0                  | 0.324852339845525 | 1     | 2.00E-04 | NA | NA | 0.0014 | 0        |
| NM_012322    | LSM5      | 0                  | 0.324852339845525 | 1     | 2.00E-04 | NA | NA | 0.0014 | 0        |
| NM_018310    | BRF2      | 0                  | 0.324852339845525 | 1     | 2.00E-04 | NA | NA | 0.0014 | 0        |
| NM_012118    | CCRN4L    | 0                  | 0.325306678782372 | 1     | 2.00E-04 | NA | NA | 0.0014 | 0        |
| NR_103715    | LINC00269 | 0                  | 0.325306678782372 | 1     | 2.00E-04 | NA | NA | 0.0014 | 0        |
| NM_018133    | MSL2      | 0                  | 0.325306678782372 | 1     | 2.00E-04 | NA | NA | 0.0014 | 0        |
| NM_001204269 | KCNA2     | 0                  | 0.325761017719219 | 1     | 2.00E-04 | NA | NA | 0.0014 | 0        |
| NM_001174060 | OSBPL10   | 0                  | 0.325761017719219 | 1     | 2.00E-04 | NA | NA | 0.0014 | 0        |
| NM_017784    | OSBPL10   | 0                  | 0.325761017719219 | 1     | 2.00E-04 | NA | NA | 0.0014 | 0        |
| NM_003086    | SNAPC4    | 0                  | 0.325761017719219 | 1     | 2.00E-04 | NA | NA | 0.0014 | 0        |
| NM_024835    | GGNBP2    | 0                  | 0.326215356656065 | 1     | 2.00E-04 | NA | NA | 0.0014 | 0        |
| NR_036532    | UBAC2-AS1 | 0                  | 0.326215356656065 | 1     | 2.00E-04 | NA | NA | 0.0014 | 0        |
| NM_014976    | PDCD11    | 0                  | 0.326669695592912 | 1     | 2.00E-04 | NA | NA | 0.0014 | 0        |
| NM_000600    | IL6       | 0.189004997728305  | 0.515674693321218 | 1     | 2.00E-04 | NA | NA | 0.0014 | 0        |
| NR_026553    | LINC00161 | 0                  | 0.327124034529759 | 1     | 2.00E-04 | NA | NA | 0.0014 | 0        |
| NR_026552    | LINC00161 | 0                  | 0.327124034529759 | 1     | 2.00E-04 | NA | NA | 0.0014 | 0        |
| NM_018078    | LARP1B    | 0                  | 0.327124034529759 | 1     | 2.00E-04 | NA | NA | 0.0014 | 0        |

|              |           |   |                   |   |          |    |    |        |   |
|--------------|-----------|---|-------------------|---|----------|----|----|--------|---|
| NM_032239    | LARP1B    | 0 | 0.327124034529759 | 1 | 2.00E-04 | NA | NA | 0.0014 | 0 |
| NM_178043    | LARP1B    | 0 | 0.327124034529759 | 1 | 2.00E-04 | NA | NA | 0.0014 | 0 |
| NM_001278604 | LARP1B    | 0 | 0.327124034529759 | 1 | 2.00E-04 | NA | NA | 0.0014 | 0 |
| NM_022725    | FANCF     | 0 | 0.327124034529759 | 1 | 2.00E-04 | NA | NA | 0.0014 | 0 |
| NR_036531    | UBAC2-AS1 | 0 | 0.327124034529759 | 1 | 2.00E-04 | NA | NA | 0.0014 | 0 |
| NM_001256566 | F2RL2     | 0 | 0.327124034529759 | 1 | 2.00E-04 | NA | NA | 0.0014 | 0 |
| NM_004101    | F2RL2     | 0 | 0.327124034529759 | 1 | 2.00E-04 | NA | NA | 0.0014 | 0 |
| NM_004109    | FDX1      | 0 | 0.327578373466606 | 1 | 2.00E-04 | NA | NA | 0.0014 | 0 |
| NM_201554    | DGKA      | 0 | 0.327578373466606 | 1 | 2.00E-04 | NA | NA | 0.0014 | 0 |
| NM_201445    | DGKA      | 0 | 0.327578373466606 | 1 | 2.00E-04 | NA | NA | 0.0014 | 0 |
| NM_201444    | DGKA      | 0 | 0.327578373466606 | 1 | 2.00E-04 | NA | NA | 0.0014 | 0 |
| NM_144716    | CCDC12    | 0 | 0.327578373466606 | 1 | 2.00E-04 | NA | NA | 0.0014 | 0 |
| NM_021188    | ZNF410    | 0 | 0.328032712403453 | 1 | 2.00E-04 | NA | NA | 0.0014 | 0 |
| NM_001242928 | ZNF410    | 0 | 0.328032712403453 | 1 | 2.00E-04 | NA | NA | 0.0014 | 0 |
| NM_001242927 | ZNF410    | 0 | 0.328032712403453 | 1 | 2.00E-04 | NA | NA | 0.0014 | 0 |
| NM_001242926 | ZNF410    | 0 | 0.328032712403453 | 1 | 2.00E-04 | NA | NA | 0.0014 | 0 |
| NM_001242924 | ZNF410    | 0 | 0.328032712403453 | 1 | 2.00E-04 | NA | NA | 0.0014 | 0 |
| NR_040251    | ZNF410    | 0 | 0.328032712403453 | 1 | 2.00E-04 | NA | NA | 0.0014 | 0 |
| NM_001145158 | HBS1L     | 0 | 0.3284870513403   | 1 | 2.00E-04 | NA | NA | 0.0014 | 0 |
| NM_006620    | HBS1L     | 0 | 0.3284870513403   | 1 | 2.00E-04 | NA | NA | 0.0014 | 0 |
| NM_001145207 | HBS1L     | 0 | 0.3284870513403   | 1 | 2.00E-04 | NA | NA | 0.0014 | 0 |
| NM_170733    | BDNF      | 0 | 0.328941390277147 | 1 | 2.00E-04 | NA | NA | 0.0014 | 0 |
| NM_172201    | KCNE2     | 0 | 0.329395729213994 | 1 | 2.00E-04 | NA | NA | 0.0014 | 0 |
| NM_001278938 | EBAG9     | 0 | 0.329395729213994 | 1 | 2.00E-04 | NA | NA | 0.0014 | 0 |
| NM_001042384 | CEP63     | 0 | 0.330304407087687 | 1 | 2.00E-04 | NA | NA | 0.0014 | 0 |
| NM_001042383 | CEP63     | 0 | 0.330304407087687 | 1 | 2.00E-04 | NA | NA | 0.0014 | 0 |
| NM_001142416 | AIMP1     | 0 | 0.330304407087687 | 1 | 2.00E-04 | NA | NA | 0.0014 | 0 |
| NM_001103184 | FMN1      | 0 | 0.330758746024534 | 1 | 2.00E-04 | NA | NA | 0.0014 | 0 |
| NR_003291    | ANKRD18DP | 0 | 0.330758746024534 | 1 | 2.00E-04 | NA | NA | 0.0014 | 0 |
| NM_005479    | FRAT1     | 0 | 0.331213084961381 | 1 | 2.00E-04 | NA | NA | 0.0014 | 0 |
| NM_001145291 | PDE6B     | 0 | 0.331213084961381 | 1 | 2.00E-04 | NA | NA | 0.0014 | 0 |
| NM_000283    | PDE6B     | 0 | 0.331213084961381 | 1 | 2.00E-04 | NA | NA | 0.0014 | 0 |
| NM_004488    | GP5       | 0 | 0.331213084961381 | 1 | 2.00E-04 | NA | NA | 0.0014 | 0 |
| NM_001001711 | DDI1      | 0 | 0.331667423898228 | 1 | 2.00E-04 | NA | NA | 0.0014 | 0 |
| NM_001083612 | HYKK      | 0 | 0.331667423898228 | 1 | 2.00E-04 | NA | NA | 0.0014 | 0 |
| NM_001013619 | HYKK      | 0 | 0.331667423898228 | 1 | 2.00E-04 | NA | NA | 0.0014 | 0 |
| NM_138711    | PPARG     | 0 | 0.331667423898228 | 1 | 2.00E-04 | NA | NA | 0.0014 | 0 |
| NM_182757    | RNF144B   | 0 | 0.331667423898228 | 1 | 2.00E-04 | NA | NA | 0.0014 | 0 |
| NM_213566    | DFFA      | 0 | 0.331667423898228 | 1 | 2.00E-04 | NA | NA | 0.0014 | 0 |
| NM_004401    | DFFA      | 0 | 0.331667423898228 | 1 | 2.00E-04 | NA | NA | 0.0014 | 0 |
| NM_004951    | GPR183    | 0 | 0.331667423898228 | 1 | 2.00E-04 | NA | NA | 0.0014 | 0 |

|              |           |                  |                   |   |          |    |    |        |   |
|--------------|-----------|------------------|-------------------|---|----------|----|----|--------|---|
| NM_001005920 | JMJD8     | 0                | 0.331667423898228 | 1 | 2.00E-04 | NA | NA | 0.0014 | 0 |
| NM_139076    | FAM175A   | 0                | 0.331667423898228 | 1 | 2.00E-04 | NA | NA | 0.0014 | 0 |
| NM_006598    | SLC12A7   | 0                | 0.331667423898228 | 1 | 2.00E-04 | NA | NA | 0.0014 | 0 |
| NM_001161662 | WWC1      | 0                | 0.332121762835075 | 1 | 2.00E-04 | NA | NA | 0.0014 | 0 |
| NM_001161661 | WWC1      | 0                | 0.332121762835075 | 1 | 2.00E-04 | NA | NA | 0.0014 | 0 |
| NM_015238    | WWC1      | 0                | 0.332121762835075 | 1 | 2.00E-04 | NA | NA | 0.0014 | 0 |
| NM_005663    | NELFA     | 0                | 0.332576101771922 | 1 | 2.00E-04 | NA | NA | 0.0014 | 0 |
| NM_014717    | ZNF536    | 0                | 0.333030440708769 | 1 | 2.00E-04 | NA | NA | 0.0014 | 0 |
| NM_014452    | TNFRSF21  | 0                | 0.333030440708769 | 1 | 2.00E-04 | NA | NA | 0.0014 | 0 |
| NM_152704    | AMER2     | 0.08905043162199 | 0.422535211267606 | 1 | 2.00E-04 | NA | NA | 0.0014 | 0 |
| NM_199138    | AMER2     | 0.08905043162199 | 0.422535211267606 | 1 | 2.00E-04 | NA | NA | 0.0014 | 0 |
| NR_036498    | LOC388906 | 0                | 0.333939118582463 | 1 | 2.00E-04 | NA | NA | 0.0014 | 0 |
| NM_006007    | ZFAND5    | 0                | 0.334847796456156 | 1 | 2.00E-04 | NA | NA | 0.0014 | 0 |
| NM_001102421 | ZFAND5    | 0                | 0.334847796456156 | 1 | 2.00E-04 | NA | NA | 0.0014 | 0 |
| NM_001102420 | ZFAND5    | 0                | 0.334847796456156 | 1 | 2.00E-04 | NA | NA | 0.0014 | 0 |
| NM_001177665 | RIF1      | 0                | 0.335302135393003 | 1 | 2.00E-04 | NA | NA | 0.0014 | 0 |
| NM_001177663 | RIF1      | 0                | 0.335302135393003 | 1 | 2.00E-04 | NA | NA | 0.0014 | 0 |
| NM_001177664 | RIF1      | 0                | 0.335302135393003 | 1 | 2.00E-04 | NA | NA | 0.0014 | 0 |
| NM_018151    | RIF1      | 0                | 0.335302135393003 | 1 | 2.00E-04 | NA | NA | 0.0014 | 0 |
| NR_003593    | TTY23B    | 0                | 0.335302135393003 | 1 | 2.00E-04 | NA | NA | 0.0014 | 0 |
| NR_001540    | TTY23     | 0                | 0.335302135393003 | 1 | 2.00E-04 | NA | NA | 0.0014 | 0 |
| NM_000209    | PDX1      | 0                | 0.33575647432985  | 1 | 2.00E-04 | NA | NA | 0.0014 | 0 |
| NR_001282    | PCDHB19P  | 0                | 0.33575647432985  | 1 | 2.00E-04 | NA | NA | 0.0014 | 0 |
| NM_001171811 | GBA       | 0                | 0.33575647432985  | 1 | 2.00E-04 | NA | NA | 0.0014 | 0 |
| NM_001005742 | GBA       | 0                | 0.33575647432985  | 1 | 2.00E-04 | NA | NA | 0.0014 | 0 |
| NM_001005741 | GBA       | 0                | 0.33575647432985  | 1 | 2.00E-04 | NA | NA | 0.0014 | 0 |
| NM_002208    | ITGAE     | 0                | 0.33575647432985  | 1 | 2.00E-04 | NA | NA | 0.0014 | 0 |
| NM_025184    | EFHC2     | 0                | 0.33575647432985  | 1 | 2.00E-04 | NA | NA | 0.0014 | 0 |
| NM_001178099 | ZNF182    | 0                | 0.33575647432985  | 1 | 2.00E-04 | NA | NA | 0.0014 | 0 |
| NM_001007088 | ZNF182    | 0                | 0.33575647432985  | 1 | 2.00E-04 | NA | NA | 0.0014 | 0 |
| NM_006962    | ZNF182    | 0                | 0.33575647432985  | 1 | 2.00E-04 | NA | NA | 0.0014 | 0 |
| NM_031889    | ENAM      | 0                | 0.336210813266697 | 1 | 2.00E-04 | NA | NA | 0.0014 | 0 |
| NM_015693    | INTU      | 0                | 0.336210813266697 | 1 | 2.00E-04 | NA | NA | 0.0014 | 0 |
| NM_016044    | FAHD2A    | 0                | 0.337119491140391 | 1 | 2.00E-04 | NA | NA | 0.0014 | 0 |
| NM_182521    | ZSWIM2    | 0                | 0.337119491140391 | 1 | 2.00E-04 | NA | NA | 0.0014 | 0 |
| NR_104260    | PRDM15    | 0                | 0.337119491140391 | 1 | 2.00E-04 | NA | NA | 0.0014 | 0 |
| NM_001130701 | STYX      | 0                | 0.337573830077238 | 1 | 2.00E-04 | NA | NA | 0.0014 | 0 |
| NM_145251    | STYX      | 0                | 0.337573830077238 | 1 | 2.00E-04 | NA | NA | 0.0014 | 0 |
| NM_020536    | CSRP2BP   | 0                | 0.337573830077238 | 1 | 2.00E-04 | NA | NA | 0.0014 | 0 |
| NM_006690    | MMP24     | 0                | 0.337573830077238 | 1 | 2.00E-04 | NA | NA | 0.0014 | 0 |
| NM_024303    | ZSCAN5A   | 0                | 0.337573830077238 | 1 | 2.00E-04 | NA | NA | 0.0014 | 0 |

|              |              |                   |                   |   |          |    |    |        |   |
|--------------|--------------|-------------------|-------------------|---|----------|----|----|--------|---|
| NM_173354    | SIK1         | 0                 | 0.337573830077238 | 1 | 2.00E-04 | NA | NA | 0.0014 | 0 |
| NM_024422    | DSC2         | 0                 | 0.338028169014085 | 1 | 2.00E-04 | NA | NA | 0.0014 | 0 |
| NM_004949    | DSC2         | 0                 | 0.338028169014085 | 1 | 2.00E-04 | NA | NA | 0.0014 | 0 |
| NM_001198954 | RNF103-CHMP3 | 0                 | 0.338028169014085 | 1 | 2.00E-04 | NA | NA | 0.0014 | 0 |
| NM_175058    | PLEKHA7      | 0                 | 0.338482507950931 | 1 | 2.00E-04 | NA | NA | 0.0014 | 0 |
| NM_206954    | PRAME        | 0                 | 0.338482507950931 | 1 | 2.00E-04 | NA | NA | 0.0014 | 0 |
| NM_006115    | PRAME        | 0                 | 0.338482507950931 | 1 | 2.00E-04 | NA | NA | 0.0014 | 0 |
| NM_206956    | PRAME        | 0                 | 0.338482507950931 | 1 | 2.00E-04 | NA | NA | 0.0014 | 0 |
| NM_206955    | PRAME        | 0                 | 0.338482507950931 | 1 | 2.00E-04 | NA | NA | 0.0014 | 0 |
| NM_206953    | PRAME        | 0                 | 0.338482507950931 | 1 | 2.00E-04 | NA | NA | 0.0014 | 0 |
| NM_004819    | SYMPK        | 0                 | 0.338936846887778 | 1 | 2.00E-04 | NA | NA | 0.0014 | 0 |
| NM_002925    | RGS10        | 0                 | 0.339391185824625 | 1 | 2.00E-04 | NA | NA | 0.0014 | 0 |
| NM_170713    | RASSF1       | 0                 | 0.339391185824625 | 1 | 2.00E-04 | NA | NA | 0.0014 | 0 |
| NM_170712    | RASSF1       | 0                 | 0.339391185824625 | 1 | 2.00E-04 | NA | NA | 0.0014 | 0 |
| NM_133371    | MYOZ3        | 0                 | 0.339845524761472 | 1 | 2.00E-04 | NA | NA | 0.0014 | 0 |
| NM_001122853 | MYOZ3        | 0                 | 0.339845524761472 | 1 | 2.00E-04 | NA | NA | 0.0014 | 0 |
| NM_014368    | LHX6         | 0                 | 0.339845524761472 | 1 | 2.00E-04 | NA | NA | 0.0014 | 0 |
| NM_199160    | LHX6         | 0                 | 0.339845524761472 | 1 | 2.00E-04 | NA | NA | 0.0014 | 0 |
| NM_001785    | CDA          | 0                 | 0.340299863698319 | 1 | 2.00E-04 | NA | NA | 0.0014 | 0 |
| NM_001199319 | PEX26        | 0                 | 0.340299863698319 | 1 | 2.00E-04 | NA | NA | 0.0014 | 0 |
| NM_017929    | PEX26        | 0                 | 0.340299863698319 | 1 | 2.00E-04 | NA | NA | 0.0014 | 0 |
| NM_145062    | ZUFSP        | 0                 | 0.340299863698319 | 1 | 2.00E-04 | NA | NA | 0.0014 | 0 |
| NM_175747    | OLIG3        | 0                 | 0.340299863698319 | 1 | 2.00E-04 | NA | NA | 0.0014 | 0 |
| NR_024373    | MIR4435-1HG  | 0.100863243980009 | 0.441617446615175 | 1 | 2.00E-04 | NA | NA | 0.0014 | 0 |
| NR_015395    | MIR4435-1HG  | 0.100863243980009 | 0.441617446615175 | 1 | 2.00E-04 | NA | NA | 0.0014 | 0 |
| NM_080429    | AQP10        | 0                 | 0.340754202635166 | 1 | 2.00E-04 | NA | NA | 0.0014 | 0 |
| NM_001013703 | EIF2AK4      | 0                 | 0.340754202635166 | 1 | 2.00E-04 | NA | NA | 0.0014 | 0 |
| NM_021627    | SEN2         | 0                 | 0.340754202635166 | 1 | 2.00E-04 | NA | NA | 0.0014 | 0 |
| NM_003106    | SOX2         | 0                 | 0.341208541572013 | 1 | 2.00E-04 | NA | NA | 0.0014 | 0 |
| NM_206824    | VKORC1       | 0                 | 0.341208541572013 | 1 | 2.00E-04 | NA | NA | 0.0014 | 0 |
| NM_024006    | VKORC1       | 0                 | 0.341208541572013 | 1 | 2.00E-04 | NA | NA | 0.0014 | 0 |
| NM_001197181 | TUBB3        | 0.106315311222172 | 0.447978191731031 | 1 | 2.00E-04 | NA | NA | 0.0014 | 0 |
| NM_014400    | LYPD3        | 0                 | 0.34166288050886  | 1 | 2.00E-04 | NA | NA | 0.0014 | 0 |
| NM_016306    | DNAJB11      | 0                 | 0.342117219445706 | 1 | 2.00E-04 | NA | NA | 0.0014 | 0 |
| NM_052916    | RNF157       | 0                 | 0.342571558382553 | 1 | 2.00E-04 | NA | NA | 0.0014 | 0 |
| NM_000922    | PDE3B        | 0                 | 0.343480236256247 | 1 | 2.00E-04 | NA | NA | 0.0014 | 0 |
| NM_030777    | SLC2A10      | 0                 | 0.343934575193094 | 1 | 2.00E-04 | NA | NA | 0.0014 | 0 |
| NM_020187    | HMCES        | 0                 | 0.343934575193094 | 1 | 2.00E-04 | NA | NA | 0.0014 | 0 |
| NM_001006109 | HMCES        | 0                 | 0.343934575193094 | 1 | 2.00E-04 | NA | NA | 0.0014 | 0 |
| NM_207407    | TMPRSS11F    | 0                 | 0.343934575193094 | 1 | 2.00E-04 | NA | NA | 0.0014 | 0 |
| NR_039946    | MIR4785      | 0                 | 0.344843253066788 | 1 | 2.00E-04 | NA | NA | 0.0014 | 0 |

|              |         |                   |                   |        |          |    |    |        |        |
|--------------|---------|-------------------|-------------------|--------|----------|----|----|--------|--------|
| NM_001257    | CDH13   | 0                 | 0.345297592003635 | 1      | 2.00E-04 | NA | NA | 0.0014 | 0      |
| NM_001220490 | CDH13   | 0                 | 0.345297592003635 | 1      | 2.00E-04 | NA | NA | 0.0014 | 0      |
| NM_001220489 | CDH13   | 0                 | 0.345297592003635 | 1      | 2.00E-04 | NA | NA | 0.0014 | 0      |
| NM_001220488 | CDH13   | 0                 | 0.345297592003635 | 1      | 2.00E-04 | NA | NA | 0.0014 | 0      |
| NM_001220491 | CDH13   | 0                 | 0.345297592003635 | 1      | 2.00E-04 | NA | NA | 0.0014 | 0      |
| NM_001220492 | CDH13   | 0                 | 0.345297592003635 | 1      | 2.00E-04 | NA | NA | 0.0014 | 0      |
| NM_181786    | HKR1    | 0                 | 0.345297592003635 | 1      | 2.00E-04 | NA | NA | 0.0014 | 0      |
| NM_014639    | TTC37   | 0                 | 0.345297592003635 | 1      | 2.00E-04 | NA | NA | 0.0014 | 0      |
| NM_212460    | ARL4A   | 0                 | 0.345751930940482 | 1      | 2.00E-04 | NA | NA | 0.0014 | 0      |
| NM_001037164 | ARL4A   | 0                 | 0.345751930940482 | 1      | 2.00E-04 | NA | NA | 0.0014 | 0      |
| NM_032871    | RELT    | 0                 | 0.346206269877328 | 1      | 2.00E-04 | NA | NA | 0.0014 | 0      |
| NM_152222    | RELT    | 0                 | 0.346206269877328 | 1      | 2.00E-04 | NA | NA | 0.0014 | 0      |
| NM_002508    | NID1    | 0                 | 0.346206269877328 | 1      | 2.00E-04 | NA | NA | 0.0014 | 0      |
| NM_001110361 | RNASE9  | 0.193094048159927 | 0.539300318037256 | 0.936  | 0.0578   | NA | NA | 0.1296 | 0.0043 |
| NM_001110359 | RNASE9  | 0.193094048159927 | 0.539300318037256 | 0.9452 | 0.0604   | NA | NA | 0.1296 | 0.0045 |
| NM_001110358 | RNASE9  | 0.193094048159927 | 0.539300318037256 | 0.9424 | 0.0592   | NA | NA | 0.1296 | 0.0044 |
| NM_001110360 | RNASE9  | 0.193094048159927 | 0.539300318037256 | 0.934  | 0.06     | NA | NA | 0.1296 | 0.0044 |
| NM_001110357 | RNASE9  | 0.193094048159927 | 0.539300318037256 | 0.94   | 0.0546   | NA | NA | 0.1296 | 0.004  |
| NM_001110356 | RNASE9  | 0.193094048159927 | 0.539300318037256 | 0.942  | 0.0572   | NA | NA | 0.1296 | 0.0042 |
| NM_001001673 | RNASE9  | 0.193094048159927 | 0.539300318037256 | 0.9456 | 0.0552   | NA | NA | 0.1296 | 0.0041 |
| NM_032023    | RASSF4  | 0                 | 0.346660608814175 | 1      | 2.00E-04 | NA | NA | 0.0014 | 0      |
| NM_001243775 | LIMA1   | 0                 | 0.346660608814175 | 1      | 2.00E-04 | NA | NA | 0.0014 | 0      |
| NM_032353    | VPS25   | 0                 | 0.347114947751022 | 1      | 2.00E-04 | NA | NA | 0.0014 | 0      |
| NM_001111018 | NAV2    | 0                 | 0.347569286687869 | 1      | 2.00E-04 | NA | NA | 0.0014 | 0      |
| NM_198277    | SLC37A2 | 0                 | 0.347569286687869 | 1      | 2.00E-04 | NA | NA | 0.0014 | 0      |
| NM_001145290 | SLC37A2 | 0                 | 0.347569286687869 | 1      | 2.00E-04 | NA | NA | 0.0014 | 0      |
| NM_006385    | ZNF211  | 0                 | 0.347569286687869 | 1      | 2.00E-04 | NA | NA | 0.0014 | 0      |
| NM_001265597 | ZNF211  | 0                 | 0.347569286687869 | 1      | 2.00E-04 | NA | NA | 0.0014 | 0      |
| NM_198855    | ZNF211  | 0                 | 0.347569286687869 | 1      | 2.00E-04 | NA | NA | 0.0014 | 0      |
| NM_001265600 | ZNF211  | 0                 | 0.347569286687869 | 1      | 2.00E-04 | NA | NA | 0.0014 | 0      |
| NM_001265599 | ZNF211  | 0                 | 0.347569286687869 | 1      | 2.00E-04 | NA | NA | 0.0014 | 0      |
| NM_001265598 | ZNF211  | 0                 | 0.347569286687869 | 1      | 2.00E-04 | NA | NA | 0.0014 | 0      |
| NR_049754    | ZNF211  | 0                 | 0.347569286687869 | 1      | 2.00E-04 | NA | NA | 0.0014 | 0      |
| NR_049753    | ZNF211  | 0                 | 0.347569286687869 | 1      | 2.00E-04 | NA | NA | 0.0014 | 0      |
| NR_049752    | ZNF211  | 0                 | 0.347569286687869 | 1      | 2.00E-04 | NA | NA | 0.0014 | 0      |
| NM_001937    | DPT     | 0                 | 0.348023625624716 | 1      | 2.00E-04 | NA | NA | 0.0014 | 0      |
| NR_037653    | ST20    | 0                 | 0.348023625624716 | 1      | 2.00E-04 | NA | NA | 0.0014 | 0      |
| NR_037652    | ST20    | 0                 | 0.348023625624716 | 1      | 2.00E-04 | NA | NA | 0.0014 | 0      |
| NM_000440    | PDE6A   | 0                 | 0.348023625624716 | 1      | 2.00E-04 | NA | NA | 0.0014 | 0      |
| NM_002164    | IDO1    | 0                 | 0.34893230349841  | 1      | 2.00E-04 | NA | NA | 0.0014 | 0      |
| NM_001142370 | PTPN18  | 0                 | 0.349386642435257 | 1      | 2.00E-04 | NA | NA | 0.0014 | 0      |



|              |                 |                   |                   |   |          |    |    |        |   |
|--------------|-----------------|-------------------|-------------------|---|----------|----|----|--------|---|
| NM_014369    | <i>PTPN18</i>   | 0                 | 0.349386642435257 | 1 | 2.00E-04 | NA | NA | 0.0014 | 0 |
| NM_001135773 | <i>SPATA2</i>   | 0                 | 0.349386642435257 | 1 | 2.00E-04 | NA | NA | 0.0014 | 0 |
| NM_213590    | <i>TRIM13</i>   | 0                 | 0.350749659245797 | 1 | 2.00E-04 | NA | NA | 0.0014 | 0 |
| NM_001007278 | <i>TRIM13</i>   | 0                 | 0.350749659245797 | 1 | 2.00E-04 | NA | NA | 0.0014 | 0 |
| NM_052811    | <i>TRIM13</i>   | 0                 | 0.350749659245797 | 1 | 2.00E-04 | NA | NA | 0.0014 | 0 |
| NM_005798    | <i>TRIM13</i>   | 0                 | 0.350749659245797 | 1 | 2.00E-04 | NA | NA | 0.0014 | 0 |
| NM_152377    | <i>C1orf87</i>  | 0                 | 0.350749659245797 | 1 | 2.00E-04 | NA | NA | 0.0014 | 0 |
| NM_001243611 | <i>LMO3</i>     | 0                 | 0.351658337119491 | 1 | 2.00E-04 | NA | NA | 0.0014 | 0 |
| NM_005080    | <i>XBP1</i>     | 0                 | 0.351658337119491 | 1 | 2.00E-04 | NA | NA | 0.0014 | 0 |
| NM_001079539 | <i>XBP1</i>     | 0                 | 0.351658337119491 | 1 | 2.00E-04 | NA | NA | 0.0014 | 0 |
| NM_181573    | <i>RFC4</i>     | 0                 | 0.351658337119491 | 1 | 2.00E-04 | NA | NA | 0.0014 | 0 |
| NM_002916    | <i>RFC4</i>     | 0                 | 0.351658337119491 | 1 | 2.00E-04 | NA | NA | 0.0014 | 0 |
| NM_181645    | <i>CCDC67</i>   | 0                 | 0.352567014993185 | 1 | 2.00E-04 | NA | NA | 0.0014 | 0 |
| NM_000236    | <i>LIPC</i>     | 0.147205815538392 | 0.500227169468423 | 1 | 2.00E-04 | NA | NA | 0.0014 | 0 |
| NM_181358    | <i>HIPK1</i>    | 0                 | 0.353021353930032 | 1 | 2.00E-04 | NA | NA | 0.0014 | 0 |
| NM_001256395 | <i>RHBG</i>     | 0                 | 0.353021353930032 | 1 | 2.00E-04 | NA | NA | 0.0014 | 0 |
| NM_020407    | <i>RHBG</i>     | 0                 | 0.353021353930032 | 1 | 2.00E-04 | NA | NA | 0.0014 | 0 |
| NM_001256396 | <i>RHBG</i>     | 0                 | 0.353021353930032 | 1 | 2.00E-04 | NA | NA | 0.0014 | 0 |
| NR_046115    | <i>RHBG</i>     | 0                 | 0.353021353930032 | 1 | 2.00E-04 | NA | NA | 0.0014 | 0 |
| NM_021902    | <i>FXD1</i>     | 0                 | 0.353021353930032 | 1 | 2.00E-04 | NA | NA | 0.0014 | 0 |
| NM_001278717 | <i>FXD1</i>     | 0                 | 0.353021353930032 | 1 | 2.00E-04 | NA | NA | 0.0014 | 0 |
| NM_002194    | <i>INPP1</i>    | 0                 | 0.353021353930032 | 1 | 2.00E-04 | NA | NA | 0.0014 | 0 |
| NM_001128928 | <i>INPP1</i>    | 0                 | 0.353021353930032 | 1 | 2.00E-04 | NA | NA | 0.0014 | 0 |
| NM_133367    | <i>PAQR8</i>    | 0                 | 0.353021353930032 | 1 | 2.00E-04 | NA | NA | 0.0014 | 0 |
| NM_001135697 | <i>SGCA</i>     | 0                 | 0.353475692866879 | 1 | 2.00E-04 | NA | NA | 0.0014 | 0 |
| NM_000023    | <i>SGCA</i>     | 0                 | 0.353475692866879 | 1 | 2.00E-04 | NA | NA | 0.0014 | 0 |
| NM_199262    | <i>SP6</i>      | 0                 | 0.353475692866879 | 1 | 2.00E-04 | NA | NA | 0.0014 | 0 |
| NM_001199148 | <i>SLC38A11</i> | 0                 | 0.353475692866879 | 1 | 2.00E-04 | NA | NA | 0.0014 | 0 |
| NM_173512    | <i>SLC38A11</i> | 0                 | 0.353475692866879 | 1 | 2.00E-04 | NA | NA | 0.0014 | 0 |
| NM_007226    | <i>NXPH2</i>    | 0.097228532485234 | 0.45115856428896  | 1 | 2.00E-04 | NA | NA | 0.0014 | 0 |
| NM_152683    | <i>CCDC111</i>  | 0                 | 0.354384370740572 | 1 | 2.00E-04 | NA | NA | 0.0014 | 0 |
| NM_012244    | <i>SLC7A8</i>   | 0                 | 0.354384370740572 | 1 | 2.00E-04 | NA | NA | 0.0014 | 0 |
| NM_012072    | <i>CD93</i>     | 0                 | 0.354384370740572 | 1 | 2.00E-04 | NA | NA | 0.0014 | 0 |
| NM_017746    | <i>TEX10</i>    | 0                 | 0.354384370740572 | 1 | 2.00E-04 | NA | NA | 0.0014 | 0 |
| NM_001161584 | <i>TEX10</i>    | 0                 | 0.354384370740572 | 1 | 2.00E-04 | NA | NA | 0.0014 | 0 |
| NM_006027    | <i>EXO1</i>     | 0                 | 0.354838709677419 | 1 | 2.00E-04 | NA | NA | 0.0014 | 0 |
| NM_003686    | <i>EXO1</i>     | 0                 | 0.354838709677419 | 1 | 2.00E-04 | NA | NA | 0.0014 | 0 |
| NR_027402    | <i>FAM223B</i>  | 0                 | 0.354838709677419 | 1 | 2.00E-04 | NA | NA | 0.0014 | 0 |
| NR_027401    | <i>FAM223A</i>  | 0                 | 0.354838709677419 | 1 | 2.00E-04 | NA | NA | 0.0014 | 0 |
| NR_002923    | <i>BCORP1</i>   | 0                 | 0.354838709677419 | 1 | 2.00E-04 | NA | NA | 0.0014 | 0 |
| NR_033732    | <i>BCORP1</i>   | 0                 | 0.354838709677419 | 1 | 2.00E-04 | NA | NA | 0.0014 | 0 |

|              |                  |   |                   |   |          |    |    |        |   |
|--------------|------------------|---|-------------------|---|----------|----|----|--------|---|
| NM_001130033 | <i>PLEKHB1</i>   | 0 | 0.355293048614266 | 1 | 2.00E-04 | NA | NA | 0.0014 | 0 |
| NM_021200    | <i>PLEKHB1</i>   | 0 | 0.355293048614266 | 1 | 2.00E-04 | NA | NA | 0.0014 | 0 |
| NM_001136006 | <i>GART</i>      | 0 | 0.355293048614266 | 1 | 2.00E-04 | NA | NA | 0.0014 | 0 |
| NM_001136005 | <i>GART</i>      | 0 | 0.355293048614266 | 1 | 2.00E-04 | NA | NA | 0.0014 | 0 |
| NM_020127    | <i>TUFT1</i>     | 0 | 0.35620172648796  | 1 | 2.00E-04 | NA | NA | 0.0014 | 0 |
| NM_001126337 | <i>TUFT1</i>     | 0 | 0.35620172648796  | 1 | 2.00E-04 | NA | NA | 0.0014 | 0 |
| NM_133444    | <i>ZNF526</i>    | 0 | 0.35620172648796  | 1 | 2.00E-04 | NA | NA | 0.0014 | 0 |
| NM_006462    | <i>RBCK1</i>     | 0 | 0.35620172648796  | 1 | 2.00E-04 | NA | NA | 0.0014 | 0 |
| NM_031229    | <i>RBCK1</i>     | 0 | 0.35620172648796  | 1 | 2.00E-04 | NA | NA | 0.0014 | 0 |
| NM_018953    | <i>HOXC5</i>     | 0 | 0.356656065424807 | 1 | 2.00E-04 | NA | NA | 0.0014 | 0 |
| NM_152860    | <i>SP7</i>       | 0 | 0.356656065424807 | 1 | 2.00E-04 | NA | NA | 0.0014 | 0 |
| NM_020675    | <i>SPC25</i>     | 0 | 0.356656065424807 | 1 | 2.00E-04 | NA | NA | 0.0014 | 0 |
| NR_102741    | <i>LINC01024</i> | 0 | 0.356656065424807 | 1 | 2.00E-04 | NA | NA | 0.0014 | 0 |
| NR_102740    | <i>LINC01024</i> | 0 | 0.356656065424807 | 1 | 2.00E-04 | NA | NA | 0.0014 | 0 |
| NR_102739    | <i>LINC01024</i> | 0 | 0.356656065424807 | 1 | 2.00E-04 | NA | NA | 0.0014 | 0 |
| NM_004356    | <i>CD81</i>      | 0 | 0.357110404361654 | 1 | 2.00E-04 | NA | NA | 0.0014 | 0 |
| NM_014110    | <i>PPP1R8</i>    | 0 | 0.357564743298501 | 1 | 2.00E-04 | NA | NA | 0.0014 | 0 |
| NM_002713    | <i>PPP1R8</i>    | 0 | 0.357564743298501 | 1 | 2.00E-04 | NA | NA | 0.0014 | 0 |
| NM_138558    | <i>PPP1R8</i>    | 0 | 0.357564743298501 | 1 | 2.00E-04 | NA | NA | 0.0014 | 0 |
| NM_001282619 | <i>GNAI2</i>     | 0 | 0.357564743298501 | 1 | 2.00E-04 | NA | NA | 0.0014 | 0 |
| NM_001282620 | <i>GNAI2</i>     | 0 | 0.357564743298501 | 1 | 2.00E-04 | NA | NA | 0.0014 | 0 |
| NR_030724    | <i>XPNPEP1</i>   | 0 | 0.357564743298501 | 1 | 2.00E-04 | NA | NA | 0.0014 | 0 |
| NM_020383    | <i>XPNPEP1</i>   | 0 | 0.357564743298501 | 1 | 2.00E-04 | NA | NA | 0.0014 | 0 |
| NM_001167604 | <i>XPNPEP1</i>   | 0 | 0.357564743298501 | 1 | 2.00E-04 | NA | NA | 0.0014 | 0 |
| NM_171997    | <i>USP2</i>      | 0 | 0.357564743298501 | 1 | 2.00E-04 | NA | NA | 0.0014 | 0 |
| NM_004854    | <i>CHST10</i>    | 0 | 0.357564743298501 | 1 | 2.00E-04 | NA | NA | 0.0014 | 0 |
| NM_001507    | <i>MLNR</i>      | 0 | 0.358019082235348 | 1 | 2.00E-04 | NA | NA | 0.0014 | 0 |
| NM_019595    | <i>ITSN2</i>     | 0 | 0.358019082235348 | 1 | 2.00E-04 | NA | NA | 0.0014 | 0 |
| NM_147152    | <i>ITSN2</i>     | 0 | 0.358019082235348 | 1 | 2.00E-04 | NA | NA | 0.0014 | 0 |
| NM_006277    | <i>ITSN2</i>     | 0 | 0.358019082235348 | 1 | 2.00E-04 | NA | NA | 0.0014 | 0 |
| NM_001688    | <i>ATP5F1</i>    | 0 | 0.358473421172194 | 1 | 2.00E-04 | NA | NA | 0.0014 | 0 |
| NM_198998    | <i>AQP12A</i>    | 0 | 0.358473421172194 | 1 | 2.00E-04 | NA | NA | 0.0014 | 0 |
| NM_178140    | <i>PDZD2</i>     | 0 | 0.358473421172194 | 1 | 2.00E-04 | NA | NA | 0.0014 | 0 |
| NM_001142598 | <i>P4HA2</i>     | 0 | 0.358473421172194 | 1 | 2.00E-04 | NA | NA | 0.0014 | 0 |
| NM_001142599 | <i>P4HA2</i>     | 0 | 0.358473421172194 | 1 | 2.00E-04 | NA | NA | 0.0014 | 0 |
| NM_001017974 | <i>P4HA2</i>     | 0 | 0.358473421172194 | 1 | 2.00E-04 | NA | NA | 0.0014 | 0 |
| NM_015253    | <i>WSCD1</i>     | 0 | 0.358927760109041 | 1 | 2.00E-04 | NA | NA | 0.0014 | 0 |
| NM_001135812 | <i>FAM60A</i>    | 0 | 0.358927760109041 | 1 | 2.00E-04 | NA | NA | 0.0014 | 0 |
| NM_001135811 | <i>FAM60A</i>    | 0 | 0.358927760109041 | 1 | 2.00E-04 | NA | NA | 0.0014 | 0 |
| NM_021238    | <i>FAM60A</i>    | 0 | 0.358927760109041 | 1 | 2.00E-04 | NA | NA | 0.0014 | 0 |
| NM_001174129 | <i>SLC11A2</i>   | 0 | 0.359382099045888 | 1 | 2.00E-04 | NA | NA | 0.0014 | 0 |

|              |                     |                   |                   |   |          |    |    |        |   |
|--------------|---------------------|-------------------|-------------------|---|----------|----|----|--------|---|
| NM_001146008 | <i>SLCO5A1</i>      | 0                 | 0.359382099045888 | 1 | 2.00E-04 | NA | NA | 0.0014 | 0 |
| NM_005650    | <i>TCF20</i>        | 0                 | 0.359836437982735 | 1 | 2.00E-04 | NA | NA | 0.0014 | 0 |
| NM_181492    | <i>TCF20</i>        | 0                 | 0.359836437982735 | 1 | 2.00E-04 | NA | NA | 0.0014 | 0 |
| NM_001271825 | <i>SERPINB6</i>     | 0                 | 0.359836437982735 | 1 | 2.00E-04 | NA | NA | 0.0014 | 0 |
| NM_001113382 | <i>FER1L5</i>       | 0                 | 0.360290776919582 | 1 | 2.00E-04 | NA | NA | 0.0014 | 0 |
| NM_182492    | <i>LRP5L</i>        | 0                 | 0.360290776919582 | 1 | 2.00E-04 | NA | NA | 0.0014 | 0 |
| NM_020397    | <i>CAMK1D</i>       | 0                 | 0.361199454793276 | 1 | 2.00E-04 | NA | NA | 0.0014 | 0 |
| NM_153498    | <i>CAMK1D</i>       | 0                 | 0.361199454793276 | 1 | 2.00E-04 | NA | NA | 0.0014 | 0 |
| NM_001014830 | <i>C14orf183</i>    | 0                 | 0.361653793730123 | 1 | 2.00E-04 | NA | NA | 0.0014 | 0 |
| NM_001243386 | <i>PARVB</i>        | 0                 | 0.36210813266697  | 1 | 2.00E-04 | NA | NA | 0.0014 | 0 |
| NR_002987    | <i>SNORA61</i>      | 0                 | 0.36210813266697  | 1 | 2.00E-04 | NA | NA | 0.0014 | 0 |
| NM_001145636 | <i>C1orf228</i>     | 0                 | 0.363016810540663 | 1 | 2.00E-04 | NA | NA | 0.0014 | 0 |
| NM_001130035 | <i>PLEKHB1</i>      | 0                 | 0.363016810540663 | 1 | 2.00E-04 | NA | NA | 0.0014 | 0 |
| NM_001130034 | <i>PLEKHB1</i>      | 0                 | 0.363016810540663 | 1 | 2.00E-04 | NA | NA | 0.0014 | 0 |
| NR_026759    | <i>FAM95B1</i>      | 0                 | 0.363016810540663 | 1 | 2.00E-04 | NA | NA | 0.0014 | 0 |
| NM_016630    | <i>SPG21</i>        | 0                 | 0.363016810540663 | 1 | 2.00E-04 | NA | NA | 0.0014 | 0 |
| NM_001127890 | <i>SPG21</i>        | 0                 | 0.363016810540663 | 1 | 2.00E-04 | NA | NA | 0.0014 | 0 |
| NM_001278216 | <i>CDK5RAP3</i>     | 0                 | 0.36347114947751  | 1 | 2.00E-04 | NA | NA | 0.0014 | 0 |
| NM_176096    | <i>CDK5RAP3</i>     | 0                 | 0.36347114947751  | 1 | 2.00E-04 | NA | NA | 0.0014 | 0 |
| NM_001278198 | <i>CDK5RAP3</i>     | 0                 | 0.36347114947751  | 1 | 2.00E-04 | NA | NA | 0.0014 | 0 |
| NM_001278217 | <i>CDK5RAP3</i>     | 0                 | 0.36347114947751  | 1 | 2.00E-04 | NA | NA | 0.0014 | 0 |
| NM_194442    | <i>LBR</i>          | 0                 | 0.36347114947751  | 1 | 2.00E-04 | NA | NA | 0.0014 | 0 |
| NM_001272038 | <i>RAB13</i>        | 0                 | 0.363925488414357 | 1 | 2.00E-04 | NA | NA | 0.0014 | 0 |
| NM_005584    | <i>MAB21L1</i>      | 0                 | 0.363925488414357 | 1 | 2.00E-04 | NA | NA | 0.0014 | 0 |
| NM_017952    | <i>PTCD3</i>        | 0.107678328032712 | 0.472058155383916 | 1 | 2.00E-04 | NA | NA | 0.0014 | 0 |
| NM_016194    | <i>GNB5</i>         | 0                 | 0.364379827351204 | 1 | 2.00E-04 | NA | NA | 0.0014 | 0 |
| NM_001256099 | <i>CTHRC1</i>       | 0                 | 0.364834166288051 | 1 | 2.00E-04 | NA | NA | 0.0014 | 0 |
| NM_000942    | <i>PPIB</i>         | 0                 | 0.364834166288051 | 1 | 2.00E-04 | NA | NA | 0.0014 | 0 |
| NM_133339    | <i>RAD17</i>        | 0                 | 0.365742844161745 | 1 | 2.00E-04 | NA | NA | 0.0014 | 0 |
| NM_003187    | <i>TAF9</i>         | 0                 | 0.366197183098592 | 1 | 2.00E-04 | NA | NA | 0.0014 | 0 |
| NM_016283    | <i>AK6</i>          | 0                 | 0.366197183098592 | 1 | 2.00E-04 | NA | NA | 0.0014 | 0 |
| NM_001015891 | <i>AK6</i>          | 0                 | 0.366197183098592 | 1 | 2.00E-04 | NA | NA | 0.0014 | 0 |
| NM_001015892 | <i>TAF9</i>         | 0                 | 0.366197183098592 | 1 | 2.00E-04 | NA | NA | 0.0014 | 0 |
| NM_198531    | <i>ATP9B</i>        | 0                 | 0.366651522035438 | 1 | 2.00E-04 | NA | NA | 0.0014 | 0 |
| NR_040022    | <i>LOC100289495</i> | 0                 | 0.366651522035438 | 1 | 2.00E-04 | NA | NA | 0.0014 | 0 |
| NM_001256585 | <i>MGLL</i>         | 0                 | 0.367105860972285 | 1 | 2.00E-04 | NA | NA | 0.0014 | 0 |
| NM_007283    | <i>MGLL</i>         | 0                 | 0.367105860972285 | 1 | 2.00E-04 | NA | NA | 0.0014 | 0 |
| NM_001003794 | <i>MGLL</i>         | 0                 | 0.367105860972285 | 1 | 2.00E-04 | NA | NA | 0.0014 | 0 |
| NM_018902    | <i>PCDHA11</i>      | 0                 | 0.367560199909132 | 1 | 2.00E-04 | NA | NA | 0.0014 | 0 |
| NM_031861    | <i>PCDHA11</i>      | 0                 | 0.367560199909132 | 1 | 2.00E-04 | NA | NA | 0.0014 | 0 |
| NM_001190317 | <i>IP6K2</i>        | 0                 | 0.367560199909132 | 1 | 2.00E-04 | NA | NA | 0.0014 | 0 |

|              |         |                    |                   |   |          |    |    |        |   |
|--------------|---------|--------------------|-------------------|---|----------|----|----|--------|---|
| NM_001190316 | IP6K2   | 0                  | 0.367560199909132 | 1 | 2.00E-04 | NA | NA | 0.0014 | 0 |
| NR_027438    | IP6K2   | 0                  | 0.367560199909132 | 1 | 2.00E-04 | NA | NA | 0.0014 | 0 |
| NM_001146179 | IP6K2   | 0                  | 0.367560199909132 | 1 | 2.00E-04 | NA | NA | 0.0014 | 0 |
| NM_001146178 | IP6K2   | 0                  | 0.367560199909132 | 1 | 2.00E-04 | NA | NA | 0.0014 | 0 |
| NR_027437    | IP6K2   | 0                  | 0.367560199909132 | 1 | 2.00E-04 | NA | NA | 0.0014 | 0 |
| NM_001005910 | IP6K2   | 0                  | 0.367560199909132 | 1 | 2.00E-04 | NA | NA | 0.0014 | 0 |
| NM_001005909 | IP6K2   | 0                  | 0.367560199909132 | 1 | 2.00E-04 | NA | NA | 0.0014 | 0 |
| NM_016291    | IP6K2   | 0                  | 0.367560199909132 | 1 | 2.00E-04 | NA | NA | 0.0014 | 0 |
| NM_001005911 | IP6K2   | 0                  | 0.367560199909132 | 1 | 2.00E-04 | NA | NA | 0.0014 | 0 |
| NM_024529    | CDC73   | 0                  | 0.368014538845979 | 1 | 2.00E-04 | NA | NA | 0.0014 | 0 |
| NM_001337    | CX3CR1  | 0.161744661517492  | 0.530213539300318 | 1 | 2.00E-04 | NA | NA | 0.0014 | 0 |
| NM_015278    | SASH1   | 0                  | 0.368923216719673 | 1 | 2.00E-04 | NA | NA | 0.0014 | 0 |
| NM_001281300 | AGAP3   | 0                  | 0.368923216719673 | 1 | 2.00E-04 | NA | NA | 0.0014 | 0 |
| NM_031946    | AGAP3   | 0                  | 0.368923216719673 | 1 | 2.00E-04 | NA | NA | 0.0014 | 0 |
| NM_001042535 | AGAP3   | 0                  | 0.368923216719673 | 1 | 2.00E-04 | NA | NA | 0.0014 | 0 |
| NM_016125    | RNFT1   | 0                  | 0.368923216719673 | 1 | 2.00E-04 | NA | NA | 0.0014 | 0 |
| NM_014643    | ZNF516  | 0                  | 0.368923216719673 | 1 | 2.00E-04 | NA | NA | 0.0014 | 0 |
| NM_001243779 | FAM213A | 0                  | 0.369831894593367 | 1 | 2.00E-04 | NA | NA | 0.0014 | 0 |
| NM_001199742 | GADD45A | 0                  | 0.370286233530214 | 1 | 2.00E-04 | NA | NA | 0.0014 | 0 |
| NM_001199741 | GADD45A | 0                  | 0.370286233530214 | 1 | 2.00E-04 | NA | NA | 0.0014 | 0 |
| NM_001924    | GADD45A | 0                  | 0.370286233530214 | 1 | 2.00E-04 | NA | NA | 0.0014 | 0 |
| NM_001100121 | ECE2    | 0                  | 0.370286233530214 | 1 | 2.00E-04 | NA | NA | 0.0014 | 0 |
| NM_001100120 | ECE2    | 0                  | 0.370286233530214 | 1 | 2.00E-04 | NA | NA | 0.0014 | 0 |
| NM_001037324 | ECE2    | 0                  | 0.370286233530214 | 1 | 2.00E-04 | NA | NA | 0.0014 | 0 |
| NM_000594    | TNF     | 0                  | 0.370286233530214 | 1 | 2.00E-04 | NA | NA | 0.0014 | 0 |
| NM_001004480 | OR11H6  | 0                  | 0.37074057246706  | 1 | 2.00E-04 | NA | NA | 0.0014 | 0 |
| NM_001204267 | GABRA4  | 0                  | 0.37074057246706  | 1 | 2.00E-04 | NA | NA | 0.0014 | 0 |
| NM_001204266 | GABRA4  | 0                  | 0.37074057246706  | 1 | 2.00E-04 | NA | NA | 0.0014 | 0 |
| NM_020971    | SPTBN4  | 0                  | 0.371649250340754 | 1 | 2.00E-04 | NA | NA | 0.0014 | 0 |
| NM_020661    | AICDA   | 0.0745115856428896 | 0.446160835983644 | 1 | 2.00E-04 | NA | NA | 0.0014 | 0 |
| NM_000713    | BLVRB   | 0                  | 0.372103589277601 | 1 | 2.00E-04 | NA | NA | 0.0014 | 0 |
| NM_001615    | ACTG2   | 0                  | 0.372557928214448 | 1 | 2.00E-04 | NA | NA | 0.0014 | 0 |
| NM_001199893 | ACTG2   | 0                  | 0.372557928214448 | 1 | 2.00E-04 | NA | NA | 0.0014 | 0 |
| NM_001251855 | PIK3R5  | 0                  | 0.372557928214448 | 1 | 2.00E-04 | NA | NA | 0.0014 | 0 |
| NM_001251851 | PIK3R5  | 0                  | 0.372557928214448 | 1 | 2.00E-04 | NA | NA | 0.0014 | 0 |
| NM_001142633 | PIK3R5  | 0                  | 0.372557928214448 | 1 | 2.00E-04 | NA | NA | 0.0014 | 0 |
| NM_001251853 | PIK3R5  | 0                  | 0.372557928214448 | 1 | 2.00E-04 | NA | NA | 0.0014 | 0 |
| NM_001251852 | PIK3R5  | 0                  | 0.372557928214448 | 1 | 2.00E-04 | NA | NA | 0.0014 | 0 |
| NM_003199    | TCF4    | 0                  | 0.372557928214448 | 1 | 2.00E-04 | NA | NA | 0.0014 | 0 |
| NM_001243230 | TCF4    | 0                  | 0.372557928214448 | 1 | 2.00E-04 | NA | NA | 0.0014 | 0 |
| NM_001083962 | TCF4    | 0                  | 0.372557928214448 | 1 | 2.00E-04 | NA | NA | 0.0014 | 0 |

|              |           |   |                   |   |          |    |    |        |   |
|--------------|-----------|---|-------------------|---|----------|----|----|--------|---|
| NM_199329    | SLC43A3   | 0 | 0.373012267151295 | 1 | 2.00E-04 | NA | NA | 0.0014 | 0 |
| NM_014096    | SLC43A3   | 0 | 0.373012267151295 | 1 | 2.00E-04 | NA | NA | 0.0014 | 0 |
| NM_001278201 | SLC43A3   | 0 | 0.373012267151295 | 1 | 2.00E-04 | NA | NA | 0.0014 | 0 |
| NM_001278206 | SLC43A3   | 0 | 0.373012267151295 | 1 | 2.00E-04 | NA | NA | 0.0014 | 0 |
| NM_001032280 | TFAP2A    | 0 | 0.373012267151295 | 1 | 2.00E-04 | NA | NA | 0.0014 | 0 |
| NM_001126181 | NRGN      | 0 | 0.373920945024989 | 1 | 2.00E-04 | NA | NA | 0.0014 | 0 |
| NM_006176    | NRGN      | 0 | 0.373920945024989 | 1 | 2.00E-04 | NA | NA | 0.0014 | 0 |
| NM_006468    | POLR3C    | 0 | 0.373920945024989 | 1 | 2.00E-04 | NA | NA | 0.0014 | 0 |
| NM_024587    | TMEM53    | 0 | 0.374375283961836 | 1 | 2.00E-04 | NA | NA | 0.0014 | 0 |
| NR_046200    | LOC400558 | 0 | 0.374829622898682 | 1 | 2.00E-04 | NA | NA | 0.0014 | 0 |
| NM_001135051 | FAM160B1  | 0 | 0.375738300772376 | 1 | 2.00E-04 | NA | NA | 0.0014 | 0 |
| NM_020940    | FAM160B1  | 0 | 0.375738300772376 | 1 | 2.00E-04 | NA | NA | 0.0014 | 0 |
| NM_015915    | ATL1      | 0 | 0.376192639709223 | 1 | 2.00E-04 | NA | NA | 0.0014 | 0 |
| NM_181598    | ATL1      | 0 | 0.376192639709223 | 1 | 2.00E-04 | NA | NA | 0.0014 | 0 |
| NM_012243    | SLC35A3   | 0 | 0.37664697864607  | 1 | 2.00E-04 | NA | NA | 0.0014 | 0 |
| NM_001271684 | SLC35A3   | 0 | 0.37664697864607  | 1 | 2.00E-04 | NA | NA | 0.0014 | 0 |
| NM_001127644 | GABRA1    | 0 | 0.37664697864607  | 1 | 2.00E-04 | NA | NA | 0.0014 | 0 |
| NM_001127645 | GABRA1    | 0 | 0.37664697864607  | 1 | 2.00E-04 | NA | NA | 0.0014 | 0 |
| NM_001127643 | GABRA1    | 0 | 0.37664697864607  | 1 | 2.00E-04 | NA | NA | 0.0014 | 0 |
| NM_001037536 | SCML1     | 0 | 0.377101317582917 | 1 | 2.00E-04 | NA | NA | 0.0014 | 0 |
| NM_001037535 | SCML1     | 0 | 0.377101317582917 | 1 | 2.00E-04 | NA | NA | 0.0014 | 0 |
| NM_001037540 | SCML1     | 0 | 0.377101317582917 | 1 | 2.00E-04 | NA | NA | 0.0014 | 0 |
| NM_006746    | SCML1     | 0 | 0.377101317582917 | 1 | 2.00E-04 | NA | NA | 0.0014 | 0 |
| NM_001145549 | TXNDC5    | 0 | 0.377101317582917 | 1 | 2.00E-04 | NA | NA | 0.0014 | 0 |
| NM_001145460 | HOPX      | 0 | 0.377555656519764 | 1 | 2.00E-04 | NA | NA | 0.0014 | 0 |
| NM_032495    | HOPX      | 0 | 0.377555656519764 | 1 | 2.00E-04 | NA | NA | 0.0014 | 0 |
| NM_139212    | HOPX      | 0 | 0.377555656519764 | 1 | 2.00E-04 | NA | NA | 0.0014 | 0 |
| NM_014994    | MAPKBP1   | 0 | 0.378009995456611 | 1 | 2.00E-04 | NA | NA | 0.0014 | 0 |
| NM_001128608 | MAPKBP1   | 0 | 0.378009995456611 | 1 | 2.00E-04 | NA | NA | 0.0014 | 0 |
| NM_001265611 | MAPKBP1   | 0 | 0.378009995456611 | 1 | 2.00E-04 | NA | NA | 0.0014 | 0 |
| NR_049762    | MAPKBP1   | 0 | 0.378009995456611 | 1 | 2.00E-04 | NA | NA | 0.0014 | 0 |
| NR_049761    | MAPKBP1   | 0 | 0.378009995456611 | 1 | 2.00E-04 | NA | NA | 0.0014 | 0 |
| NM_001168499 | CNDP2     | 0 | 0.378009995456611 | 1 | 2.00E-04 | NA | NA | 0.0014 | 0 |
| NM_019048    | ASNSD1    | 0 | 0.378009995456611 | 1 | 2.00E-04 | NA | NA | 0.0014 | 0 |
| NM_001003828 | PARVB     | 0 | 0.378009995456611 | 1 | 2.00E-04 | NA | NA | 0.0014 | 0 |
| NM_144570    | HN1L      | 0 | 0.378918673330304 | 1 | 2.00E-04 | NA | NA | 0.0014 | 0 |
| NM_005791    | MPHOSPH10 | 0 | 0.378918673330304 | 1 | 2.00E-04 | NA | NA | 0.0014 | 0 |
| NM_022062    | PKNOX2    | 0 | 0.379373012267151 | 1 | 2.00E-04 | NA | NA | 0.0014 | 0 |
| NM_004853    | STX8      | 0 | 0.379373012267151 | 1 | 2.00E-04 | NA | NA | 0.0014 | 0 |
| NR_033656    | STX8      | 0 | 0.379373012267151 | 1 | 2.00E-04 | NA | NA | 0.0014 | 0 |
| NM_033503    | BMF       | 0 | 0.379827351203998 | 1 | 2.00E-04 | NA | NA | 0.0014 | 0 |

|              |           |                    |                   |   |          |    |    |        |   |
|--------------|-----------|--------------------|-------------------|---|----------|----|----|--------|---|
| NM_001144030 | NAT10     | 0                  | 0.380736029077692 | 1 | 2.00E-04 | NA | NA | 0.0014 | 0 |
| NM_024662    | NAT10     | 0                  | 0.380736029077692 | 1 | 2.00E-04 | NA | NA | 0.0014 | 0 |
| NM_031990    | PTBP1     | 0                  | 0.382099045888233 | 1 | 2.00E-04 | NA | NA | 0.0014 | 0 |
| NM_002819    | PTBP1     | 0                  | 0.382099045888233 | 1 | 2.00E-04 | NA | NA | 0.0014 | 0 |
| NM_031991    | PTBP1     | 0                  | 0.382099045888233 | 1 | 2.00E-04 | NA | NA | 0.0014 | 0 |
| NM_000143    | FH        | 0                  | 0.38255338482508  | 1 | 2.00E-04 | NA | NA | 0.0014 | 0 |
| NM_017580    | ZRANB1    | 0                  | 0.383007723761926 | 1 | 2.00E-04 | NA | NA | 0.0014 | 0 |
| NM_003173    | SUV39H1   | 0                  | 0.383007723761926 | 1 | 2.00E-04 | NA | NA | 0.0014 | 0 |
| NM_001243876 | SPHK2     | 0                  | 0.383462062698773 | 1 | 2.00E-04 | NA | NA | 0.0014 | 0 |
| NM_001204158 | SPHK2     | 0                  | 0.383462062698773 | 1 | 2.00E-04 | NA | NA | 0.0014 | 0 |
| NM_020126    | SPHK2     | 0                  | 0.383462062698773 | 1 | 2.00E-04 | NA | NA | 0.0014 | 0 |
| NR_003923    | GUCY1B2   | 0                  | 0.383462062698773 | 1 | 2.00E-04 | NA | NA | 0.0014 | 0 |
| NR_038362    | ZNF345    | 0                  | 0.38391640163562  | 1 | 2.00E-04 | NA | NA | 0.0014 | 0 |
| NM_001242474 | ZNF345    | 0                  | 0.38391640163562  | 1 | 2.00E-04 | NA | NA | 0.0014 | 0 |
| NM_001242472 | ZNF345    | 0                  | 0.38391640163562  | 1 | 2.00E-04 | NA | NA | 0.0014 | 0 |
| NM_003419    | ZNF345    | 0                  | 0.38391640163562  | 1 | 2.00E-04 | NA | NA | 0.0014 | 0 |
| NM_006698    | BLCAP     | 0                  | 0.38391640163562  | 1 | 2.00E-04 | NA | NA | 0.0014 | 0 |
| NM_001167820 | BLCAP     | 0                  | 0.38391640163562  | 1 | 2.00E-04 | NA | NA | 0.0014 | 0 |
| NM_001167822 | BLCAP     | 0                  | 0.38391640163562  | 1 | 2.00E-04 | NA | NA | 0.0014 | 0 |
| NM_001167821 | BLCAP     | 0                  | 0.38391640163562  | 1 | 2.00E-04 | NA | NA | 0.0014 | 0 |
| NM_002353    | TACSTD2   | 0                  | 0.384370740572467 | 1 | 2.00E-04 | NA | NA | 0.0014 | 0 |
| NM_000126    | ETFA      | 0                  | 0.384370740572467 | 1 | 2.00E-04 | NA | NA | 0.0014 | 0 |
| NM_001127716 | ETFA      | 0                  | 0.384370740572467 | 1 | 4.00E-04 | NA | NA | 0.0029 | 0 |
| NM_002975    | CLEC11A   | 0.0885960926851431 | 0.473875511131304 | 1 | 2.00E-04 | NA | NA | 0.0014 | 0 |
| NM_005943    | MOCOS1    | 0                  | 0.385733757383008 | 1 | 2.00E-04 | NA | NA | 0.0014 | 0 |
| NM_001099681 | MAGIX     | 0                  | 0.386188096319855 | 1 | 2.00E-04 | NA | NA | 0.0014 | 0 |
| NM_001099682 | MAGIX     | 0                  | 0.386188096319855 | 1 | 2.00E-04 | NA | NA | 0.0014 | 0 |
| NM_024859    | MAGIX     | 0                  | 0.386188096319855 | 1 | 2.00E-04 | NA | NA | 0.0014 | 0 |
| NM_001193389 | UNKL      | 0                  | 0.386188096319855 | 1 | 2.00E-04 | NA | NA | 0.0014 | 0 |
| NM_001276414 | UNKL      | 0                  | 0.386188096319855 | 1 | 2.00E-04 | NA | NA | 0.0014 | 0 |
| NM_178516    | EXOC3L1   | 0                  | 0.386188096319855 | 1 | 2.00E-04 | NA | NA | 0.0014 | 0 |
| NR_036500    | FOXN3-AS1 | 0                  | 0.386642435256701 | 1 | 2.00E-04 | NA | NA | 0.0014 | 0 |
| NM_002318    | LOXL2     | 0                  | 0.386642435256701 | 1 | 2.00E-04 | NA | NA | 0.0014 | 0 |
| NR_002781    | TSPY26P   | 0                  | 0.387096774193548 | 1 | 2.00E-04 | NA | NA | 0.0014 | 0 |
| NM_001664    | RHOA      | 0                  | 0.387096774193548 | 1 | 2.00E-04 | NA | NA | 0.0014 | 0 |
| NM_003034    | ST8SIA1   | 0                  | 0.387551113130395 | 1 | 2.00E-04 | NA | NA | 0.0014 | 0 |
| NM_015203    | RPRD2     | 0                  | 0.388005452067242 | 1 | 2.00E-04 | NA | NA | 0.0014 | 0 |
| NM_004333    | BRAF      | 0                  | 0.388005452067242 | 1 | 2.00E-04 | NA | NA | 0.0014 | 0 |
| NM_001174127 | SLC11A2   | 0                  | 0.388459791004089 | 1 | 2.00E-04 | NA | NA | 0.0014 | 0 |
| NM_000617    | SLC11A2   | 0                  | 0.388459791004089 | 1 | 2.00E-04 | NA | NA | 0.0014 | 0 |
| NR_033422    | SLC11A2   | 0                  | 0.388459791004089 | 1 | 2.00E-04 | NA | NA | 0.0014 | 0 |

|              |                      |   |                   |   |          |    |    |        |   |
|--------------|----------------------|---|-------------------|---|----------|----|----|--------|---|
| NR_033421    | <i>SLC11A2</i>       | 0 | 0.388459791004089 | 1 | 2.00E-04 | NA | NA | 0.0014 | 0 |
| NM_001174128 | <i>SLC11A2</i>       | 0 | 0.388459791004089 | 1 | 2.00E-04 | NA | NA | 0.0014 | 0 |
| NM_001174126 | <i>SLC11A2</i>       | 0 | 0.388459791004089 | 1 | 2.00E-04 | NA | NA | 0.0014 | 0 |
| NM_201551    | <i>NELL1</i>         | 0 | 0.388914129940936 | 1 | 2.00E-04 | NA | NA | 0.0014 | 0 |
| NM_006157    | <i>NELL1</i>         | 0 | 0.388914129940936 | 1 | 2.00E-04 | NA | NA | 0.0014 | 0 |
| NM_016612    | <i>SLC25A37</i>      | 0 | 0.388914129940936 | 1 | 2.00E-04 | NA | NA | 0.0014 | 0 |
| NM_001015882 | <i>DNAJC25</i>       | 0 | 0.388914129940936 | 1 | 2.00E-04 | NA | NA | 0.0014 | 0 |
| NR_037148    | <i>DNAJC25</i>       | 0 | 0.388914129940936 | 1 | 2.00E-04 | NA | NA | 0.0014 | 0 |
| NM_004125    | <i>DNAJC25-GNG10</i> | 0 | 0.388914129940936 | 1 | 2.00E-04 | NA | NA | 0.0014 | 0 |
| NM_001142578 | <i>ZNF780A</i>       | 0 | 0.388914129940936 | 1 | 2.00E-04 | NA | NA | 0.0014 | 0 |
| NM_001142577 | <i>ZNF780A</i>       | 0 | 0.388914129940936 | 1 | 2.00E-04 | NA | NA | 0.0014 | 0 |
| NM_001142579 | <i>ZNF780A</i>       | 0 | 0.388914129940936 | 1 | 2.00E-04 | NA | NA | 0.0014 | 0 |
| NM_020640    | <i>DCUN1D1</i>       | 0 | 0.388914129940936 | 1 | 2.00E-04 | NA | NA | 0.0014 | 0 |
| NM_001129829 | <i>CACNA1C</i>       | 0 | 0.389368468877783 | 1 | 2.00E-04 | NA | NA | 0.0014 | 0 |
| NM_001129840 | <i>CACNA1C</i>       | 0 | 0.389368468877783 | 1 | 2.00E-04 | NA | NA | 0.0014 | 0 |
| NM_001129841 | <i>CACNA1C</i>       | 0 | 0.389368468877783 | 1 | 2.00E-04 | NA | NA | 0.0014 | 0 |
| NM_001129831 | <i>CACNA1C</i>       | 0 | 0.389368468877783 | 1 | 2.00E-04 | NA | NA | 0.0014 | 0 |
| NM_001129827 | <i>CACNA1C</i>       | 0 | 0.389368468877783 | 1 | 2.00E-04 | NA | NA | 0.0014 | 0 |
| NM_000719    | <i>CACNA1C</i>       | 0 | 0.389368468877783 | 1 | 2.00E-04 | NA | NA | 0.0014 | 0 |
| NM_001129832 | <i>CACNA1C</i>       | 0 | 0.389368468877783 | 1 | 2.00E-04 | NA | NA | 0.0014 | 0 |
| NM_001129844 | <i>CACNA1C</i>       | 0 | 0.389368468877783 | 1 | 2.00E-04 | NA | NA | 0.0014 | 0 |
| NM_001167625 | <i>CACNA1C</i>       | 0 | 0.389368468877783 | 1 | 2.00E-04 | NA | NA | 0.0014 | 0 |
| NM_001129830 | <i>CACNA1C</i>       | 0 | 0.389368468877783 | 1 | 2.00E-04 | NA | NA | 0.0014 | 0 |
| NM_001129843 | <i>CACNA1C</i>       | 0 | 0.389368468877783 | 1 | 2.00E-04 | NA | NA | 0.0014 | 0 |
| NM_001129842 | <i>CACNA1C</i>       | 0 | 0.389368468877783 | 1 | 2.00E-04 | NA | NA | 0.0014 | 0 |
| NM_001129834 | <i>CACNA1C</i>       | 0 | 0.389368468877783 | 1 | 2.00E-04 | NA | NA | 0.0014 | 0 |
| NM_001129838 | <i>CACNA1C</i>       | 0 | 0.389368468877783 | 1 | 2.00E-04 | NA | NA | 0.0014 | 0 |
| NM_001129837 | <i>CACNA1C</i>       | 0 | 0.389368468877783 | 1 | 2.00E-04 | NA | NA | 0.0014 | 0 |
| NM_001129833 | <i>CACNA1C</i>       | 0 | 0.389368468877783 | 1 | 2.00E-04 | NA | NA | 0.0014 | 0 |
| NM_001129846 | <i>CACNA1C</i>       | 0 | 0.389368468877783 | 1 | 2.00E-04 | NA | NA | 0.0014 | 0 |
| NM_001167623 | <i>CACNA1C</i>       | 0 | 0.389368468877783 | 1 | 2.00E-04 | NA | NA | 0.0014 | 0 |
| NM_001129839 | <i>CACNA1C</i>       | 0 | 0.389368468877783 | 1 | 2.00E-04 | NA | NA | 0.0014 | 0 |
| NM_001167624 | <i>CACNA1C</i>       | 0 | 0.389368468877783 | 1 | 2.00E-04 | NA | NA | 0.0014 | 0 |
| NM_001129836 | <i>CACNA1C</i>       | 0 | 0.389368468877783 | 1 | 2.00E-04 | NA | NA | 0.0014 | 0 |
| NM_001129835 | <i>CACNA1C</i>       | 0 | 0.389368468877783 | 1 | 2.00E-04 | NA | NA | 0.0014 | 0 |
| NM_199460    | <i>CACNA1C</i>       | 0 | 0.389368468877783 | 1 | 2.00E-04 | NA | NA | 0.0014 | 0 |
| NM_001145710 | <i>FAM228B</i>       | 0 | 0.389368468877783 | 1 | 2.00E-04 | NA | NA | 0.0014 | 0 |
| NM_001098814 | <i>SRL</i>           | 0 | 0.389368468877783 | 1 | 2.00E-04 | NA | NA | 0.0014 | 0 |
| NM_014234    | <i>HSD17B8</i>       | 0 | 0.38982280781463  | 1 | 2.00E-04 | NA | NA | 0.0014 | 0 |
| NM_018198    | <i>DNAJC11</i>       | 0 | 0.390731485688323 | 1 | 2.00E-04 | NA | NA | 0.0014 | 0 |
| NM_001195396 | <i>ARL4A</i>         | 0 | 0.39118582462517  | 1 | 2.00E-04 | NA | NA | 0.0014 | 0 |

|              |          |   |                   |   |          |    |    |        |   |
|--------------|----------|---|-------------------|---|----------|----|----|--------|---|
| NM_005738    | ARL4A    | 0 | 0.39118582462517  | 1 | 2.00E-04 | NA | NA | 0.0014 | 0 |
| NM_014975    | MAST1    | 0 | 0.391640163562017 | 1 | 2.00E-04 | NA | NA | 0.0014 | 0 |
| NM_002472    | MYH8     | 0 | 0.391640163562017 | 1 | 2.00E-04 | NA | NA | 0.0014 | 0 |
| NM_178857    | RP1L1    | 0 | 0.391640163562017 | 1 | 2.00E-04 | NA | NA | 0.0014 | 0 |
| NM_015425    | POLR1A   | 0 | 0.392094502498864 | 1 | 2.00E-04 | NA | NA | 0.0014 | 0 |
| NM_001010880 | ZNF780A  | 0 | 0.393003180372558 | 1 | 2.00E-04 | NA | NA | 0.0014 | 0 |
| NM_001005339 | RGS10    | 0 | 0.394366197183099 | 1 | 2.00E-04 | NA | NA | 0.0014 | 0 |
| NM_001282879 | GGTLC2   | 0 | 0.394820536119945 | 1 | 2.00E-04 | NA | NA | 0.0014 | 0 |
| NM_020775    | KIAA1324 | 0 | 0.395729213993639 | 1 | 2.00E-04 | NA | NA | 0.0014 | 0 |
| NM_001267048 | KIAA1324 | 0 | 0.395729213993639 | 1 | 2.00E-04 | NA | NA | 0.0014 | 0 |
| NR_049773    | KIAA1324 | 0 | 0.395729213993639 | 1 | 2.00E-04 | NA | NA | 0.0014 | 0 |
| NM_001284352 | KIAA1324 | 0 | 0.395729213993639 | 1 | 2.00E-04 | NA | NA | 0.0014 | 0 |
| NM_173491    | LSM11    | 0 | 0.396183552930486 | 1 | 2.00E-04 | NA | NA | 0.0014 | 0 |
| NM_153246    | C6orf223 | 0 | 0.396637891867333 | 1 | 2.00E-04 | NA | NA | 0.0014 | 0 |
| NM_001171992 | C6orf223 | 0 | 0.396637891867333 | 1 | 2.00E-04 | NA | NA | 0.0014 | 0 |
| NM_001270615 | DEDD2    | 0 | 0.396637891867333 | 1 | 2.00E-04 | NA | NA | 0.0014 | 0 |
| NM_133328    | DEDD2    | 0 | 0.396637891867333 | 1 | 2.00E-04 | NA | NA | 0.0014 | 0 |
| NR_073050    | DEDD2    | 0 | 0.396637891867333 | 1 | 2.00E-04 | NA | NA | 0.0014 | 0 |
| NR_073049    | DEDD2    | 0 | 0.396637891867333 | 1 | 2.00E-04 | NA | NA | 0.0014 | 0 |
| NR_073048    | DEDD2    | 0 | 0.396637891867333 | 1 | 2.00E-04 | NA | NA | 0.0014 | 0 |
| NR_073046    | DEDD2    | 0 | 0.396637891867333 | 1 | 2.00E-04 | NA | NA | 0.0014 | 0 |
| NR_073052    | DEDD2    | 0 | 0.396637891867333 | 1 | 2.00E-04 | NA | NA | 0.0014 | 0 |
| NR_073051    | DEDD2    | 0 | 0.396637891867333 | 1 | 2.00E-04 | NA | NA | 0.0014 | 0 |
| NM_001040424 | PRDM15   | 0 | 0.396637891867333 | 1 | 2.00E-04 | NA | NA | 0.0014 | 0 |
| NM_001282934 | PRDM15   | 0 | 0.396637891867333 | 1 | 2.00E-04 | NA | NA | 0.0014 | 0 |
| NR_104257    | PRDM15   | 0 | 0.396637891867333 | 1 | 2.00E-04 | NA | NA | 0.0014 | 0 |
| NR_104258    | PRDM15   | 0 | 0.396637891867333 | 1 | 2.00E-04 | NA | NA | 0.0014 | 0 |
| NM_022115    | PRDM15   | 0 | 0.396637891867333 | 1 | 2.00E-04 | NA | NA | 0.0014 | 0 |
| NM_020211    | RGMA     | 0 | 0.39709223080418  | 1 | 2.00E-04 | NA | NA | 0.0014 | 0 |
| NM_021244    | RRAGD    | 0 | 0.39709223080418  | 1 | 2.00E-04 | NA | NA | 0.0014 | 0 |
| NM_025142    | TAOK1    | 0 | 0.397546569741027 | 1 | 2.00E-04 | NA | NA | 0.0014 | 0 |
| NM_020791    | TAOK1    | 0 | 0.397546569741027 | 1 | 2.00E-04 | NA | NA | 0.0014 | 0 |
| NR_039749    | MIR4523  | 0 | 0.397546569741027 | 1 | 2.00E-04 | NA | NA | 0.0014 | 0 |
| NM_022731    | NUCKS1   | 0 | 0.398455247614721 | 1 | 2.00E-04 | NA | NA | 0.0014 | 0 |
| NM_017772    | TBC1D22B | 0 | 0.398909586551567 | 1 | 2.00E-04 | NA | NA | 0.0014 | 0 |
| NM_030791    | SGPP1    | 0 | 0.399818264425261 | 1 | 2.00E-04 | NA | NA | 0.0014 | 0 |
| NR_037873    | ZHX1     | 0 | 0.399818264425261 | 1 | 2.00E-04 | NA | NA | 0.0014 | 0 |
| NM_001080542 | FBF1     | 0 | 0.401181281235802 | 1 | 2.00E-04 | NA | NA | 0.0014 | 0 |
| NM_005529    | HSPG2    | 0 | 0.401635620172649 | 1 | 2.00E-04 | NA | NA | 0.0014 | 0 |
| NR_003370    | RRN3P1   | 0 | 0.401635620172649 | 1 | 2.00E-04 | NA | NA | 0.0014 | 0 |
| NM_020946    | DENND1A  | 0 | 0.401635620172649 | 1 | 2.00E-04 | NA | NA | 0.0014 | 0 |



|              |            |   |                   |   |          |    |    |        |   |
|--------------|------------|---|-------------------|---|----------|----|----|--------|---|
| NM_024820    | DENND1A    | 0 | 0.401635620172649 | 1 | 2.00E-04 | NA | NA | 0.0014 | 0 |
| NM_020697    | KCNS2      | 0 | 0.402544298046343 | 1 | 2.00E-04 | NA | NA | 0.0014 | 0 |
| NM_003306    | TRPC4      | 0 | 0.402544298046343 | 1 | 2.00E-04 | NA | NA | 0.0014 | 0 |
| NM_016179    | TRPC4      | 0 | 0.402544298046343 | 1 | 2.00E-04 | NA | NA | 0.0014 | 0 |
| NM_001135957 | TRPC4      | 0 | 0.402544298046343 | 1 | 2.00E-04 | NA | NA | 0.0014 | 0 |
| NM_001135956 | TRPC4      | 0 | 0.402544298046343 | 1 | 2.00E-04 | NA | NA | 0.0014 | 0 |
| NM_001135958 | TRPC4      | 0 | 0.402544298046343 | 1 | 2.00E-04 | NA | NA | 0.0014 | 0 |
| NM_001135955 | TRPC4      | 0 | 0.402544298046343 | 1 | 2.00E-04 | NA | NA | 0.0014 | 0 |
| NM_001008660 | PICALM     | 0 | 0.402998636983189 | 1 | 2.00E-04 | NA | NA | 0.0014 | 0 |
| NM_001206946 | PICALM     | 0 | 0.402998636983189 | 1 | 2.00E-04 | NA | NA | 0.0014 | 0 |
| NM_007166    | PICALM     | 0 | 0.402998636983189 | 1 | 2.00E-04 | NA | NA | 0.0014 | 0 |
| NM_003486    | SLC7A5     | 0 | 0.403907314856883 | 1 | 2.00E-04 | NA | NA | 0.0014 | 0 |
| NM_002090    | CXCL3      | 0 | 0.403907314856883 | 1 | 2.00E-04 | NA | NA | 0.0014 | 0 |
| NM_020725    | ATXN7L1    | 0 | 0.403907314856883 | 1 | 2.00E-04 | NA | NA | 0.0014 | 0 |
| NM_152749    | ATXN7L1    | 0 | 0.403907314856883 | 1 | 2.00E-04 | NA | NA | 0.0014 | 0 |
| NM_005252    | FOS        | 0 | 0.40436165379373  | 1 | 2.00E-04 | NA | NA | 0.0014 | 0 |
| NR_026895    | AP5M1      | 0 | 0.404815992730577 | 1 | 2.00E-04 | NA | NA | 0.0014 | 0 |
| NM_018229    | AP5M1      | 0 | 0.404815992730577 | 1 | 2.00E-04 | NA | NA | 0.0014 | 0 |
| NM_001076778 | FAM107A    | 0 | 0.404815992730577 | 1 | 2.00E-04 | NA | NA | 0.0014 | 0 |
| NM_007177    | FAM107A    | 0 | 0.404815992730577 | 1 | 2.00E-04 | NA | NA | 0.0014 | 0 |
| NM_004316    | ASCL1      | 0 | 0.405270331667424 | 1 | 2.00E-04 | NA | NA | 0.0014 | 0 |
| NM_001282552 | BTBD3      | 0 | 0.405270331667424 | 1 | 2.00E-04 | NA | NA | 0.0014 | 0 |
| NM_181443    | BTBD3      | 0 | 0.405270331667424 | 1 | 2.00E-04 | NA | NA | 0.0014 | 0 |
| NM_018103    | LRRC8D     | 0 | 0.405724670604271 | 1 | 2.00E-04 | NA | NA | 0.0014 | 0 |
| NR_027259    | RBM12B-AS1 | 0 | 0.405724670604271 | 1 | 2.00E-04 | NA | NA | 0.0014 | 0 |
| NM_001243612 | LMO3       | 0 | 0.405724670604271 | 1 | 2.00E-04 | NA | NA | 0.0014 | 0 |
| NM_001040002 | MEOX1      | 0 | 0.406179009541118 | 1 | 2.00E-04 | NA | NA | 0.0014 | 0 |
| NM_016180    | SLC45A2    | 0 | 0.406179009541118 | 1 | 2.00E-04 | NA | NA | 0.0014 | 0 |
| NM_001012509 | SLC45A2    | 0 | 0.406179009541118 | 1 | 2.00E-04 | NA | NA | 0.0014 | 0 |
| NM_001967    | EIF4A2     | 0 | 0.406633348477965 | 1 | 2.00E-04 | NA | NA | 0.0014 | 0 |
| NM_181726    | ANKRD37    | 0 | 0.406633348477965 | 1 | 2.00E-04 | NA | NA | 0.0014 | 0 |
| NM_004231    | ATP6V1F    | 0 | 0.406633348477965 | 1 | 2.00E-04 | NA | NA | 0.0014 | 0 |
| NM_001198909 | ATP6V1F    | 0 | 0.406633348477965 | 1 | 2.00E-04 | NA | NA | 0.0014 | 0 |
| NM_024046    | CAMKV      | 0 | 0.407087687414811 | 1 | 2.00E-04 | NA | NA | 0.0014 | 0 |
| NM_145304    | C7orf33    | 0 | 0.407542026351658 | 1 | 2.00E-04 | NA | NA | 0.0014 | 0 |
| NM_174937    | TCERG1L    | 0 | 0.408450704225352 | 1 | 2.00E-04 | NA | NA | 0.0014 | 0 |
| NM_020125    | SLAMF8     | 0 | 0.408905043162199 | 1 | 2.00E-04 | NA | NA | 0.0014 | 0 |
| NM_001113324 | TEN1       | 0 | 0.409359382099046 | 1 | 2.00E-04 | NA | NA | 0.0014 | 0 |
| NR_037709    | TEN1-CDK3  | 0 | 0.409359382099046 | 1 | 2.00E-04 | NA | NA | 0.0014 | 0 |
| NM_001145030 | TOPAZ1     | 0 | 0.409359382099046 | 1 | 2.00E-04 | NA | NA | 0.0014 | 0 |
| NM_001278711 | NRN1       | 0 | 0.409813721035893 | 1 | 2.00E-04 | NA | NA | 0.0014 | 0 |

|              |           |                    |                   |   |          |    |    |        |   |
|--------------|-----------|--------------------|-------------------|---|----------|----|----|--------|---|
| NM_198679    | RAPGEF1   | 0                  | 0.409813721035893 | 1 | 2.00E-04 | NA | NA | 0.0014 | 0 |
| NM_198515    | CCDC172   | 0                  | 0.41026805997274  | 1 | 2.00E-04 | NA | NA | 0.0014 | 0 |
| NR_046648    | HLTF-AS1  | 0                  | 0.41026805997274  | 1 | 2.00E-04 | NA | NA | 0.0014 | 0 |
| NM_001199037 | SERINC2   | 0                  | 0.41163107678328  | 1 | 2.00E-04 | NA | NA | 0.0014 | 0 |
| NM_014690    | FAM131B   | 0                  | 0.41163107678328  | 1 | 2.00E-04 | NA | NA | 0.0014 | 0 |
| NM_001198630 | RUNX1T1   | 0                  | 0.412539754656974 | 1 | 2.00E-04 | NA | NA | 0.0014 | 0 |
| NM_001198634 | RUNX1T1   | 0                  | 0.412539754656974 | 1 | 2.00E-04 | NA | NA | 0.0014 | 0 |
| NM_001198627 | RUNX1T1   | 0                  | 0.412539754656974 | 1 | 2.00E-04 | NA | NA | 0.0014 | 0 |
| NM_001198626 | RUNX1T1   | 0                  | 0.412539754656974 | 1 | 2.00E-04 | NA | NA | 0.0014 | 0 |
| NM_175635    | RUNX1T1   | 0                  | 0.412539754656974 | 1 | 2.00E-04 | NA | NA | 0.0014 | 0 |
| NM_001198679 | RUNX1T1   | 0                  | 0.412539754656974 | 1 | 2.00E-04 | NA | NA | 0.0014 | 0 |
| NM_001198629 | RUNX1T1   | 0                  | 0.412539754656974 | 1 | 2.00E-04 | NA | NA | 0.0014 | 0 |
| NM_001198625 | RUNX1T1   | 0                  | 0.412539754656974 | 1 | 2.00E-04 | NA | NA | 0.0014 | 0 |
| NM_001198632 | RUNX1T1   | 0                  | 0.412539754656974 | 1 | 2.00E-04 | NA | NA | 0.0014 | 0 |
| NM_001198631 | RUNX1T1   | 0                  | 0.412539754656974 | 1 | 2.00E-04 | NA | NA | 0.0014 | 0 |
| NM_004098    | EMX2      | 0                  | 0.412994093593821 | 1 | 2.00E-04 | NA | NA | 0.0014 | 0 |
| NM_001165924 | EMX2      | 0                  | 0.412994093593821 | 1 | 2.00E-04 | NA | NA | 0.0014 | 0 |
| NM_019056    | NDUFB11   | 0                  | 0.412994093593821 | 1 | 2.00E-04 | NA | NA | 0.0014 | 0 |
| NM_001135998 | NDUFB11   | 0                  | 0.412994093593821 | 1 | 2.00E-04 | NA | NA | 0.0014 | 0 |
| NR_036208    | MIR4323   | 0                  | 0.413902771467515 | 1 | 2.00E-04 | NA | NA | 0.0014 | 0 |
| NM_203370    | FAM212A   | 0                  | 0.414357110404362 | 1 | 2.00E-04 | NA | NA | 0.0014 | 0 |
| NM_182562    | FAM169B   | 0                  | 0.414357110404362 | 1 | 2.00E-04 | NA | NA | 0.0014 | 0 |
| NM_001282972 | Sep 02    | 0                  | 0.414811449341209 | 1 | 2.00E-04 | NA | NA | 0.0014 | 0 |
| NM_001008492 | Sep 02    | 0                  | 0.414811449341209 | 1 | 2.00E-04 | NA | NA | 0.0014 | 0 |
| NM_001282973 | Sep 02    | 0                  | 0.414811449341209 | 1 | 2.00E-04 | NA | NA | 0.0014 | 0 |
| NM_004404    | Sep 02    | 0                  | 0.414811449341209 | 1 | 2.00E-04 | NA | NA | 0.0014 | 0 |
| NM_007126    | VCP       | 0                  | 0.414811449341209 | 1 | 2.00E-04 | NA | NA | 0.0014 | 0 |
| NM_005727    | TSPAN1    | 0                  | 0.415265788278055 | 1 | 2.00E-04 | NA | NA | 0.0014 | 0 |
| NM_020719    | PRR12     | 0                  | 0.415720127214902 | 1 | 2.00E-04 | NA | NA | 0.0014 | 0 |
| NM_198689    | KRTAP10-7 | 0                  | 0.415720127214902 | 1 | 2.00E-04 | NA | NA | 0.0014 | 0 |
| NM_007223    | GPR176    | 0                  | 0.415720127214902 | 1 | 2.00E-04 | NA | NA | 0.0014 | 0 |
| NM_001271854 | GPR176    | 0                  | 0.415720127214902 | 1 | 2.00E-04 | NA | NA | 0.0014 | 0 |
| NM_003936    | CDK5R2    | 0                  | 0.416174466151749 | 1 | 2.00E-04 | NA | NA | 0.0014 | 0 |
| NR_027379    | C1orf180  | 0.0186278964107224 | 0.435256701499318 | 1 | 2.00E-04 | NA | NA | 0.0014 | 0 |
| NM_001001928 | PPARA     | 0                  | 0.417083144025443 | 1 | 2.00E-04 | NA | NA | 0.0014 | 0 |
| NM_005036    | PPARA     | 0                  | 0.417083144025443 | 1 | 2.00E-04 | NA | NA | 0.0014 | 0 |
| NM_014069    | PSORS1C2  | 0                  | 0.417083144025443 | 1 | 2.00E-04 | NA | NA | 0.0014 | 0 |
| NM_015266    | SLC9A8    | 0                  | 0.417991821899137 | 1 | 2.00E-04 | NA | NA | 0.0014 | 0 |
| NR_048540    | SLC9A8    | 0                  | 0.417991821899137 | 1 | 2.00E-04 | NA | NA | 0.0014 | 0 |
| NM_001260491 | SLC9A8    | 0                  | 0.417991821899137 | 1 | 2.00E-04 | NA | NA | 0.0014 | 0 |
| NR_048539    | SLC9A8    | 0                  | 0.417991821899137 | 1 | 2.00E-04 | NA | NA | 0.0014 | 0 |

|              |              |                     |                   |   |          |    |    |        |   |
|--------------|--------------|---------------------|-------------------|---|----------|----|----|--------|---|
| NR_048538    | SLC9A8       | 0                   | 0.417991821899137 | 1 | 2.00E-04 | NA | NA | 0.0014 | 0 |
| NR_048537    | SLC9A8       | 0                   | 0.417991821899137 | 1 | 2.00E-04 | NA | NA | 0.0014 | 0 |
| NR_027650    | C15orf40     | 0                   | 0.417991821899137 | 1 | 2.00E-04 | NA | NA | 0.0014 | 0 |
| NR_027649    | C15orf40     | 0                   | 0.417991821899137 | 1 | 2.00E-04 | NA | NA | 0.0014 | 0 |
| NM_001160116 | C15orf40     | 0                   | 0.417991821899137 | 1 | 2.00E-04 | NA | NA | 0.0014 | 0 |
| NM_001160115 | C15orf40     | 0                   | 0.417991821899137 | 1 | 2.00E-04 | NA | NA | 0.0014 | 0 |
| NM_001160113 | C15orf40     | 0                   | 0.417991821899137 | 1 | 2.00E-04 | NA | NA | 0.0014 | 0 |
| NM_001160114 | C15orf40     | 0                   | 0.417991821899137 | 1 | 2.00E-04 | NA | NA | 0.0014 | 0 |
| NM_144597    | C15orf40     | 0                   | 0.417991821899137 | 1 | 2.00E-04 | NA | NA | 0.0014 | 0 |
| NM_001244871 | DAB2         | 0                   | 0.417991821899137 | 1 | 2.00E-04 | NA | NA | 0.0014 | 0 |
| NM_001343    | DAB2         | 0                   | 0.417991821899137 | 1 | 2.00E-04 | NA | NA | 0.0014 | 0 |
| NM_144693    | ZNF558       | 0                   | 0.418446160835984 | 1 | 2.00E-04 | NA | NA | 0.0014 | 0 |
| NM_001145057 | IL18BP       | 0                   | 0.418900499772831 | 1 | 2.00E-04 | NA | NA | 0.0014 | 0 |
| NM_001145055 | IL18BP       | 0                   | 0.418900499772831 | 1 | 2.00E-04 | NA | NA | 0.0014 | 0 |
| NM_006482    | DYRK2        | 0                   | 0.419809177646524 | 1 | 2.00E-04 | NA | NA | 0.0014 | 0 |
| NM_003583    | DYRK2        | 0                   | 0.419809177646524 | 1 | 2.00E-04 | NA | NA | 0.0014 | 0 |
| NM_013255    | MKLN1        | 0                   | 0.420717855520218 | 1 | 2.00E-04 | NA | NA | 0.0014 | 0 |
| NM_003836    | DLK1         | 0                   | 0.421172194457065 | 1 | 2.00E-04 | NA | NA | 0.0014 | 0 |
| NM_001278554 | UBE2E3       | 0                   | 0.421626533393912 | 1 | 2.00E-04 | NA | NA | 0.0014 | 0 |
| NM_016531    | KLF3         | 0                   | 0.421626533393912 | 1 | 2.00E-04 | NA | NA | 0.0014 | 0 |
| NM_000762    | CYP2A6       | 0.00954111767378464 | 0.431167651067697 | 1 | 2.00E-04 | NA | NA | 0.0014 | 0 |
| NR_027406    | LOC100129034 | 0                   | 0.422535211267606 | 1 | 2.00E-04 | NA | NA | 0.0014 | 0 |
| NM_001130528 | SPAG9        | 0                   | 0.422535211267606 | 1 | 2.00E-04 | NA | NA | 0.0014 | 0 |
| NM_003971    | SPAG9        | 0                   | 0.422535211267606 | 1 | 2.00E-04 | NA | NA | 0.0014 | 0 |
| NM_001130527 | SPAG9        | 0                   | 0.422535211267606 | 1 | 2.00E-04 | NA | NA | 0.0014 | 0 |
| NM_002033    | FUT4         | 0                   | 0.422989550204453 | 1 | 2.00E-04 | NA | NA | 0.0014 | 0 |
| NM_206860    | TACC2        | 0                   | 0.424352567014993 | 1 | 2.00E-04 | NA | NA | 0.0014 | 0 |
| NM_006997    | TACC2        | 0                   | 0.424352567014993 | 1 | 2.00E-04 | NA | NA | 0.0014 | 0 |
| NM_001104    | ACTN3        | 0                   | 0.424352567014993 | 1 | 2.00E-04 | NA | NA | 0.0014 | 0 |
| NR_047663    | ACTN3        | 0                   | 0.424352567014993 | 1 | 2.00E-04 | NA | NA | 0.0014 | 0 |
| NM_004369    | COL6A3       | 0                   | 0.424352567014993 | 1 | 2.00E-04 | NA | NA | 0.0014 | 0 |
| NM_057164    | COL6A3       | 0                   | 0.424352567014993 | 1 | 2.00E-04 | NA | NA | 0.0014 | 0 |
| NM_057165    | COL6A3       | 0                   | 0.424352567014993 | 1 | 2.00E-04 | NA | NA | 0.0014 | 0 |
| NM_057166    | COL6A3       | 0                   | 0.424352567014993 | 1 | 2.00E-04 | NA | NA | 0.0014 | 0 |
| NM_057167    | COL6A3       | 0                   | 0.424352567014993 | 1 | 2.00E-04 | NA | NA | 0.0014 | 0 |
| NM_001207026 | POU2F2       | 0                   | 0.42480690595184  | 1 | 2.00E-04 | NA | NA | 0.0014 | 0 |
| NM_001207025 | POU2F2       | 0                   | 0.42480690595184  | 1 | 2.00E-04 | NA | NA | 0.0014 | 0 |
| NM_002698    | POU2F2       | 0                   | 0.42480690595184  | 1 | 2.00E-04 | NA | NA | 0.0014 | 0 |
| NM_001247994 | POU2F2       | 0                   | 0.42480690595184  | 1 | 2.00E-04 | NA | NA | 0.0014 | 0 |
| NM_138969    | SDR16C5      | 0                   | 0.42480690595184  | 1 | 2.00E-04 | NA | NA | 0.0014 | 0 |
| NM_001032384 | PQBP1        | 0                   | 0.425261244888687 | 1 | 2.00E-04 | NA | NA | 0.0014 | 0 |

|              |                   |                    |                   |   |          |    |    |        |   |
|--------------|-------------------|--------------------|-------------------|---|----------|----|----|--------|---|
| NM_005710    | <i>PQBP1</i>      | 0                  | 0.425261244888687 | 1 | 2.00E-04 | NA | NA | 0.0014 | 0 |
| NM_152376    | <i>UBXN10</i>     | 0                  | 0.425715583825534 | 1 | 2.00E-04 | NA | NA | 0.0014 | 0 |
| NM_005985    | <i>SNAI1</i>      | 0                  | 0.425715583825534 | 1 | 2.00E-04 | NA | NA | 0.0014 | 0 |
| NM_015554    | <i>GLCE</i>       | 0                  | 0.426169922762381 | 1 | 2.00E-04 | NA | NA | 0.0014 | 0 |
| NR_103552    | <i>C8orf49</i>    | 0                  | 0.426169922762381 | 1 | 2.00E-04 | NA | NA | 0.0014 | 0 |
| NR_034002    | <i>MCF2L-AS1</i>  | 0                  | 0.426169922762381 | 1 | 2.00E-04 | NA | NA | 0.0014 | 0 |
| NM_017704    | <i>ANKRD49</i>    | 0                  | 0.426624261699228 | 1 | 2.00E-04 | NA | NA | 0.0014 | 0 |
| NM_007111    | <i>TFDP1</i>      | 0                  | 0.426624261699228 | 1 | 2.00E-04 | NA | NA | 0.0014 | 0 |
| NR_026580    | <i>TFDP1</i>      | 0                  | 0.426624261699228 | 1 | 2.00E-04 | NA | NA | 0.0014 | 0 |
| NM_001258029 | <i>GSN</i>        | 0                  | 0.426624261699228 | 1 | 2.00E-04 | NA | NA | 0.0014 | 0 |
| NM_001256214 | <i>ATP1A3</i>     | 0                  | 0.426624261699228 | 1 | 2.00E-04 | NA | NA | 0.0014 | 0 |
| NM_152296    | <i>ATP1A3</i>     | 0                  | 0.426624261699228 | 1 | 2.00E-04 | NA | NA | 0.0014 | 0 |
| NM_001128626 | <i>SPIRE1</i>     | 0.0186278964107224 | 0.445706497046797 | 1 | 2.00E-04 | NA | NA | 0.0014 | 0 |
| NM_020148    | <i>SPIRE1</i>     | 0.0186278964107224 | 0.445706497046797 | 1 | 2.00E-04 | NA | NA | 0.0014 | 0 |
| NM_001923    | <i>DDB1</i>       | 0                  | 0.427078600636075 | 1 | 2.00E-04 | NA | NA | 0.0014 | 0 |
| NM_003139    | <i>SRPR</i>       | 0                  | 0.427078600636075 | 1 | 2.00E-04 | NA | NA | 0.0014 | 0 |
| NM_001177842 | <i>SRPR</i>       | 0                  | 0.427078600636075 | 1 | 2.00E-04 | NA | NA | 0.0014 | 0 |
| NM_001256213 | <i>ATP1A3</i>     | 0                  | 0.427078600636075 | 1 | 2.00E-04 | NA | NA | 0.0014 | 0 |
| NM_000304    | <i>PMP22</i>      | 0                  | 0.427532939572921 | 1 | 2.00E-04 | NA | NA | 0.0014 | 0 |
| NR_104017    | <i>PMP22</i>      | 0                  | 0.427532939572921 | 1 | 2.00E-04 | NA | NA | 0.0014 | 0 |
| NR_104018    | <i>PMP22</i>      | 0                  | 0.427532939572921 | 1 | 2.00E-04 | NA | NA | 0.0014 | 0 |
| NM_001281456 | <i>PMP22</i>      | 0                  | 0.427532939572921 | 1 | 2.00E-04 | NA | NA | 0.0014 | 0 |
| NM_013442    | <i>STOML2</i>     | 0                  | 0.427987278509768 | 1 | 2.00E-04 | NA | NA | 0.0014 | 0 |
| NM_015975    | <i>TAF9B</i>      | 0                  | 0.427987278509768 | 1 | 2.00E-04 | NA | NA | 0.0014 | 0 |
| NM_001146    | <i>ANGPT1</i>     | 0                  | 0.428441617446615 | 1 | 2.00E-04 | NA | NA | 0.0014 | 0 |
| NM_001199859 | <i>ANGPT1</i>     | 0                  | 0.428441617446615 | 1 | 2.00E-04 | NA | NA | 0.0014 | 0 |
| NM_015564    | <i>LRRTM2</i>     | 0                  | 0.428895956383462 | 1 | 2.00E-04 | NA | NA | 0.0014 | 0 |
| NR_027182    | <i>JMJD1C-AS1</i> | 0                  | 0.429350295320309 | 1 | 2.00E-04 | NA | NA | 0.0014 | 0 |
| NM_003899    | <i>ARHGEF7</i>    | 0                  | 0.429804634257156 | 1 | 2.00E-04 | NA | NA | 0.0014 | 0 |
| NM_080645    | <i>COL12A1</i>    | 0                  | 0.43071331213085  | 1 | 2.00E-04 | NA | NA | 0.0014 | 0 |
| NM_004370    | <i>COL12A1</i>    | 0                  | 0.43071331213085  | 1 | 2.00E-04 | NA | NA | 0.0014 | 0 |
| NM_001171904 | <i>VPRBP</i>      | 0                  | 0.432530667878237 | 1 | 2.00E-04 | NA | NA | 0.0014 | 0 |
| NM_014703    | <i>VPRBP</i>      | 0                  | 0.432530667878237 | 1 | 2.00E-04 | NA | NA | 0.0014 | 0 |
| NR_002975    | <i>SNORA43</i>    | 0                  | 0.433893684688778 | 1 | 2.00E-04 | NA | NA | 0.0014 | 0 |
| NM_199424    | <i>WWP2</i>       | 0                  | 0.434802362562472 | 1 | 2.00E-04 | NA | NA | 0.0014 | 0 |
| NM_022575    | <i>VPS16</i>      | 0                  | 0.435256701499318 | 1 | 2.00E-04 | NA | NA | 0.0014 | 0 |
| NM_080413    | <i>VPS16</i>      | 0                  | 0.435256701499318 | 1 | 2.00E-04 | NA | NA | 0.0014 | 0 |
| NM_001142673 | <i>ATG13</i>      | 0                  | 0.435711040436165 | 1 | 2.00E-04 | NA | NA | 0.0014 | 0 |
| NM_001205122 | <i>ATG13</i>      | 0                  | 0.435711040436165 | 1 | 2.00E-04 | NA | NA | 0.0014 | 0 |
| NM_014741    | <i>ATG13</i>      | 0                  | 0.435711040436165 | 1 | 2.00E-04 | NA | NA | 0.0014 | 0 |
| NM_001205121 | <i>ATG13</i>      | 0                  | 0.435711040436165 | 1 | 2.00E-04 | NA | NA | 0.0014 | 0 |

|              |                     |   |                   |   |          |    |    |        |   |
|--------------|---------------------|---|-------------------|---|----------|----|----|--------|---|
| NM_001205119 | <i>ATG13</i>        | 0 | 0.435711040436165 | 1 | 2.00E-04 | NA | NA | 0.0014 | 0 |
| NM_001205120 | <i>ATG13</i>        | 0 | 0.435711040436165 | 1 | 2.00E-04 | NA | NA | 0.0014 | 0 |
| NM_015372    | <i>C22orf24</i>     | 0 | 0.435711040436165 | 1 | 2.00E-04 | NA | NA | 0.0014 | 0 |
| NM_007159    | <i>SLMAP</i>        | 0 | 0.436165379373012 | 1 | 2.00E-04 | NA | NA | 0.0014 | 0 |
| NM_004126    | <i>GNG11</i>        | 0 | 0.436165379373012 | 1 | 2.00E-04 | NA | NA | 0.0014 | 0 |
| NM_145178    | <i>ATOH7</i>        | 0 | 0.437074057246706 | 1 | 2.00E-04 | NA | NA | 0.0014 | 0 |
| NM_030919    | <i>FAM83D</i>       | 0 | 0.437528396183553 | 1 | 2.00E-04 | NA | NA | 0.0014 | 0 |
| NM_001039842 | <i>OXLD1</i>        | 0 | 0.437528396183553 | 1 | 2.00E-04 | NA | NA | 0.0014 | 0 |
| NR_033990    | <i>LOC100129138</i> | 0 | 0.43934575193094  | 1 | 2.00E-04 | NA | NA | 0.0014 | 0 |
| NR_026825    | <i>RPSAP52</i>      | 0 | 0.43934575193094  | 1 | 2.00E-04 | NA | NA | 0.0014 | 0 |
| NM_007115    | <i>TNFAIP6</i>      | 0 | 0.440254429804634 | 1 | 2.00E-04 | NA | NA | 0.0014 | 0 |
| NM_178127    | <i>ANGPTL5</i>      | 0 | 0.440254429804634 | 1 | 2.00E-04 | NA | NA | 0.0014 | 0 |
| NM_014155    | <i>ZBTB44</i>       | 0 | 0.440254429804634 | 1 | 2.00E-04 | NA | NA | 0.0014 | 0 |
| NR_031722    | <i>MIR103B2</i>     | 0 | 0.441163107678328 | 1 | 2.00E-04 | NA | NA | 0.0014 | 0 |
| NM_001277732 | <i>AOC3</i>         | 0 | 0.442071785552022 | 1 | 2.00E-04 | NA | NA | 0.0014 | 0 |
| NM_198217    | <i>ING1</i>         | 0 | 0.443889141299409 | 1 | 2.00E-04 | NA | NA | 0.0014 | 0 |
| NM_001039783 | <i>TXNRD3NB</i>     | 0 | 0.444343480236256 | 1 | 2.00E-04 | NA | NA | 0.0014 | 0 |
| NM_001170    | <i>AQP7</i>         | 0 | 0.444343480236256 | 1 | 2.00E-04 | NA | NA | 0.0014 | 0 |
| NM_152400    | <i>C4orf32</i>      | 0 | 0.444797819173103 | 1 | 2.00E-04 | NA | NA | 0.0014 | 0 |
| NM_014932    | <i>NLGN1</i>        | 0 | 0.44525215810995  | 1 | 2.00E-04 | NA | NA | 0.0014 | 0 |
| NM_001134479 | <i>LRRC8D</i>       | 0 | 0.445706497046797 | 1 | 2.00E-04 | NA | NA | 0.0014 | 0 |
| NM_001256268 | <i>MYPN</i>         | 0 | 0.447523852794184 | 1 | 2.00E-04 | NA | NA | 0.0014 | 0 |
| NM_032578    | <i>MYPN</i>         | 0 | 0.447523852794184 | 1 | 2.00E-04 | NA | NA | 0.0014 | 0 |
| NR_045663    | <i>MYPN</i>         | 0 | 0.447523852794184 | 1 | 2.00E-04 | NA | NA | 0.0014 | 0 |
| NM_001017963 | <i>HSP90AA1</i>     | 0 | 0.447523852794184 | 1 | 2.00E-04 | NA | NA | 0.0014 | 0 |
| NR_029699    | <i>MIR136</i>       | 0 | 0.447978191731031 | 1 | 2.00E-04 | NA | NA | 0.0014 | 0 |
| NM_138448    | <i>ACYP2</i>        | 0 | 0.447978191731031 | 1 | 2.00E-04 | NA | NA | 0.0014 | 0 |
| NR_002990    | <i>SNORA5B</i>      | 0 | 0.447978191731031 | 1 | 2.00E-04 | NA | NA | 0.0014 | 0 |
| NM_014732    | <i>KIAA0513</i>     | 0 | 0.448432530667878 | 1 | 2.00E-04 | NA | NA | 0.0014 | 0 |
| NM_017855    | <i>ODAM</i>         | 0 | 0.448432530667878 | 1 | 2.00E-04 | NA | NA | 0.0014 | 0 |
| NM_014911    | <i>AAK1</i>         | 0 | 0.449341208541572 | 1 | 2.00E-04 | NA | NA | 0.0014 | 0 |
| NM_015115    | <i>DCUN1D4</i>      | 0 | 0.449795547478419 | 1 | 2.00E-04 | NA | NA | 0.0014 | 0 |
| NM_001040402 | <i>DCUN1D4</i>      | 0 | 0.449795547478419 | 1 | 2.00E-04 | NA | NA | 0.0014 | 0 |
| NM_005430    | <i>WNT1</i>         | 0 | 0.450249886415266 | 1 | 2.00E-04 | NA | NA | 0.0014 | 0 |
| NM_152603    | <i>ZNF567</i>       | 0 | 0.450249886415266 | 1 | 2.00E-04 | NA | NA | 0.0014 | 0 |
| NM_001198832 | <i>PDE4DIP</i>      | 0 | 0.450249886415266 | 1 | 2.00E-04 | NA | NA | 0.0014 | 0 |
| NM_002736    | <i>PRKAR2B</i>      | 0 | 0.450704225352113 | 1 | 2.00E-04 | NA | NA | 0.0014 | 0 |
| NM_022045    | <i>MTBP</i>         | 0 | 0.450704225352113 | 1 | 2.00E-04 | NA | NA | 0.0014 | 0 |
| NM_006504    | <i>PTPRE</i>        | 0 | 0.452975920036347 | 1 | 2.00E-04 | NA | NA | 0.0014 | 0 |
| NM_025198    | <i>MTERFD3</i>      | 0 | 0.452975920036347 | 1 | 2.00E-04 | NA | NA | 0.0014 | 0 |
| NM_001033050 | <i>MTERFD3</i>      | 0 | 0.452975920036347 | 1 | 2.00E-04 | NA | NA | 0.0014 | 0 |

|              |           |   |                   |   |          |    |    |        |   |
|--------------|-----------|---|-------------------|---|----------|----|----|--------|---|
| NM_001856    | COL16A1   | 0 | 0.453884597910041 | 1 | 2.00E-04 | NA | NA | 0.0014 | 0 |
| NM_014053    | FLVCR1    | 0 | 0.454338936846888 | 1 | 2.00E-04 | NA | NA | 0.0014 | 0 |
| NM_003400    | XPO1      | 0 | 0.454338936846888 | 1 | 2.00E-04 | NA | NA | 0.0014 | 0 |
| NM_178468    | FAM83C    | 0 | 0.456156292594275 | 1 | 2.00E-04 | NA | NA | 0.0014 | 0 |
| NM_144659    | TCP10L    | 0 | 0.456156292594275 | 1 | 2.00E-04 | NA | NA | 0.0014 | 0 |
| NM_001243256 | ZIC4      | 0 | 0.456156292594275 | 1 | 2.00E-04 | NA | NA | 0.0014 | 0 |
| NM_032153    | ZIC4      | 0 | 0.456156292594275 | 1 | 2.00E-04 | NA | NA | 0.0014 | 0 |
| NM_152765    | C8orf46   | 0 | 0.457064970467969 | 1 | 2.00E-04 | NA | NA | 0.0014 | 0 |
| NR_027000    | LINC00965 | 0 | 0.457064970467969 | 1 | 2.00E-04 | NA | NA | 0.0014 | 0 |
| NM_032406    | PCDHGC4   | 0 | 0.457519309404816 | 1 | 2.00E-04 | NA | NA | 0.0014 | 0 |
| NM_018928    | PCDHGC4   | 0 | 0.457519309404816 | 1 | 2.00E-04 | NA | NA | 0.0014 | 0 |
| NM_014752    | SPCS2     | 0 | 0.459336665152204 | 1 | 2.00E-04 | NA | NA | 0.0014 | 0 |
| NM_000839    | GRM2      | 0 | 0.45979100408905  | 1 | 2.00E-04 | NA | NA | 0.0014 | 0 |
| NM_001130063 | GRM2      | 0 | 0.45979100408905  | 1 | 2.00E-04 | NA | NA | 0.0014 | 0 |
| NM_001146009 | SLCO5A1   | 0 | 0.45979100408905  | 1 | 2.00E-04 | NA | NA | 0.0014 | 0 |
| NM_001111298 | PPIL6     | 0 | 0.460245343025897 | 1 | 2.00E-04 | NA | NA | 0.0014 | 0 |
| NM_173672    | PPIL6     | 0 | 0.460245343025897 | 1 | 2.00E-04 | NA | NA | 0.0014 | 0 |
| NM_001161010 | ARMC10    | 0 | 0.460699681962744 | 1 | 2.00E-04 | NA | NA | 0.0014 | 0 |
| NM_001161009 | ARMC10    | 0 | 0.460699681962744 | 1 | 2.00E-04 | NA | NA | 0.0014 | 0 |
| NM_001161013 | ARMC10    | 0 | 0.460699681962744 | 1 | 2.00E-04 | NA | NA | 0.0014 | 0 |
| NM_001161012 | ARMC10    | 0 | 0.460699681962744 | 1 | 2.00E-04 | NA | NA | 0.0014 | 0 |
| NM_001161011 | ARMC10    | 0 | 0.460699681962744 | 1 | 2.00E-04 | NA | NA | 0.0014 | 0 |
| NM_031905    | ARMC10    | 0 | 0.460699681962744 | 1 | 2.00E-04 | NA | NA | 0.0014 | 0 |
| NR_073375    | MCM2      | 0 | 0.461608359836438 | 1 | 2.00E-04 | NA | NA | 0.0014 | 0 |
| NM_004526    | MCM2      | 0 | 0.461608359836438 | 1 | 2.00E-04 | NA | NA | 0.0014 | 0 |
| NM_001010979 | C1orf189  | 0 | 0.461608359836438 | 1 | 2.00E-04 | NA | NA | 0.0014 | 0 |
| NM_138712    | PPARG     | 0 | 0.462062698773285 | 1 | 2.00E-04 | NA | NA | 0.0014 | 0 |
| NM_005037    | PPARG     | 0 | 0.462062698773285 | 1 | 2.00E-04 | NA | NA | 0.0014 | 0 |
| NM_001002261 | ZFYVE27   | 0 | 0.462517037710132 | 1 | 2.00E-04 | NA | NA | 0.0014 | 0 |
| NM_001713    | BHMT      | 0 | 0.462517037710132 | 1 | 2.00E-04 | NA | NA | 0.0014 | 0 |
| NM_004982    | KCNJ8     | 0 | 0.462971376646979 | 1 | 2.00E-04 | NA | NA | 0.0014 | 0 |
| NM_001166246 | HPSE2     | 0 | 0.463425715583826 | 1 | 2.00E-04 | NA | NA | 0.0014 | 0 |
| NM_001166245 | HPSE2     | 0 | 0.463425715583826 | 1 | 2.00E-04 | NA | NA | 0.0014 | 0 |
| NM_001166244 | HPSE2     | 0 | 0.463425715583826 | 1 | 2.00E-04 | NA | NA | 0.0014 | 0 |
| NM_021828    | HPSE2     | 0 | 0.463425715583826 | 1 | 2.00E-04 | NA | NA | 0.0014 | 0 |
| NM_025141    | TM2D3     | 0 | 0.463425715583826 | 1 | 2.00E-04 | NA | NA | 0.0014 | 0 |
| NM_078474    | TM2D3     | 0 | 0.463425715583826 | 1 | 2.00E-04 | NA | NA | 0.0014 | 0 |
| NR_002717    | ATXN8OS   | 0 | 0.464334393457519 | 1 | 2.00E-04 | NA | NA | 0.0014 | 0 |
| NM_001242476 | ZNF345    | 0 | 0.464334393457519 | 1 | 2.00E-04 | NA | NA | 0.0014 | 0 |
| NM_001242475 | ZNF345    | 0 | 0.464334393457519 | 1 | 2.00E-04 | NA | NA | 0.0014 | 0 |
| NM_022103    | ZNF667    | 0 | 0.464334393457519 | 1 | 2.00E-04 | NA | NA | 0.0014 | 0 |

|              |           |   |                   |   |          |    |    |        |   |
|--------------|-----------|---|-------------------|---|----------|----|----|--------|---|
| NR_030740    | ZNF667    | 0 | 0.464334393457519 | 1 | 2.00E-04 | NA | NA | 0.0014 | 0 |
| NR_038976    | LOC339874 | 0 | 0.464788732394366 | 1 | 2.00E-04 | NA | NA | 0.0014 | 0 |
| NM_020988    | GNAO1     | 0 | 0.465243071331213 | 1 | 2.00E-04 | NA | NA | 0.0014 | 0 |
| NM_138736    | GNAO1     | 0 | 0.465243071331213 | 1 | 2.00E-04 | NA | NA | 0.0014 | 0 |
| NM_002774    | KLK6      | 0 | 0.465243071331213 | 1 | 2.00E-04 | NA | NA | 0.0014 | 0 |
| NR_003551    | DPY19L2P4 | 0 | 0.466606088141754 | 1 | 2.00E-04 | NA | NA | 0.0014 | 0 |
| NM_000613    | HPX       | 0 | 0.467060427078601 | 1 | 2.00E-04 | NA | NA | 0.0014 | 0 |
| NM_002254    | KIF3C     | 0 | 0.467060427078601 | 1 | 2.00E-04 | NA | NA | 0.0014 | 0 |
| NM_018159    | NUDT11    | 0 | 0.467060427078601 | 1 | 2.00E-04 | NA | NA | 0.0014 | 0 |
| NM_001143818 | SERPINB2  | 0 | 0.468423443889141 | 1 | 2.00E-04 | NA | NA | 0.0014 | 0 |
| NM_002575    | SERPINB2  | 0 | 0.468423443889141 | 1 | 2.00E-04 | NA | NA | 0.0014 | 0 |
| NM_001242776 | TMEM139   | 0 | 0.469332121762835 | 1 | 2.00E-04 | NA | NA | 0.0014 | 0 |
| NM_001242777 | TMEM139   | 0 | 0.469332121762835 | 1 | 2.00E-04 | NA | NA | 0.0014 | 0 |
| NM_001242773 | TMEM139   | 0 | 0.469332121762835 | 1 | 2.00E-04 | NA | NA | 0.0014 | 0 |
| NM_001242774 | TMEM139   | 0 | 0.469332121762835 | 1 | 2.00E-04 | NA | NA | 0.0014 | 0 |
| NM_001242775 | TMEM139   | 0 | 0.469332121762835 | 1 | 2.00E-04 | NA | NA | 0.0014 | 0 |
| NM_001282877 | TMEM139   | 0 | 0.469332121762835 | 1 | 2.00E-04 | NA | NA | 0.0014 | 0 |
| NM_153345    | TMEM139   | 0 | 0.469332121762835 | 1 | 2.00E-04 | NA | NA | 0.0014 | 0 |
| NR_104250    | TMEM139   | 0 | 0.469332121762835 | 1 | 2.00E-04 | NA | NA | 0.0014 | 0 |
| NR_104251    | TMEM139   | 0 | 0.469332121762835 | 1 | 2.00E-04 | NA | NA | 0.0014 | 0 |
| NR_104252    | TMEM139   | 0 | 0.469332121762835 | 1 | 2.00E-04 | NA | NA | 0.0014 | 0 |
| NR_104253    | TMEM139   | 0 | 0.469332121762835 | 1 | 2.00E-04 | NA | NA | 0.0014 | 0 |
| NR_104254    | TMEM139   | 0 | 0.469332121762835 | 1 | 2.00E-04 | NA | NA | 0.0014 | 0 |
| NM_001282876 | TMEM139   | 0 | 0.469332121762835 | 1 | 2.00E-04 | NA | NA | 0.0014 | 0 |
| NR_040003    | TMEM139   | 0 | 0.469332121762835 | 1 | 2.00E-04 | NA | NA | 0.0014 | 0 |
| NM_001278    | CHUK      | 0 | 0.469332121762835 | 1 | 2.00E-04 | NA | NA | 0.0014 | 0 |
| NM_001184958 | C3orf20   | 0 | 0.470240799636529 | 1 | 2.00E-04 | NA | NA | 0.0014 | 0 |
| NM_001184957 | C3orf20   | 0 | 0.470240799636529 | 1 | 2.00E-04 | NA | NA | 0.0014 | 0 |
| NM_032137    | C3orf20   | 0 | 0.470240799636529 | 1 | 2.00E-04 | NA | NA | 0.0014 | 0 |
| NM_005760    | CEBPZ     | 0 | 0.470695138573376 | 1 | 2.00E-04 | NA | NA | 0.0014 | 0 |
| NM_001159484 | NUP210L   | 0 | 0.47160381644707  | 1 | 2.00E-04 | NA | NA | 0.0014 | 0 |
| NM_207308    | NUP210L   | 0 | 0.47160381644707  | 1 | 2.00E-04 | NA | NA | 0.0014 | 0 |
| NM_004551    | NDUFS3    | 0 | 0.472512494320763 | 1 | 2.00E-04 | NA | NA | 0.0014 | 0 |
| NM_015714    | GOS2      | 0 | 0.475238527941845 | 1 | 2.00E-04 | NA | NA | 0.0014 | 0 |
| NM_198152    | UTS2B     | 0 | 0.475692866878692 | 1 | 2.00E-04 | NA | NA | 0.0014 | 0 |
| NM_024537    | CARS2     | 0 | 0.476601544752385 | 1 | 2.00E-04 | NA | NA | 0.0014 | 0 |
| NM_025079    | ZC3H12A   | 0 | 0.477055883689232 | 1 | 2.00E-04 | NA | NA | 0.0014 | 0 |
| NM_022802    | CTBP2     | 0 | 0.477510222626079 | 1 | 2.00E-04 | NA | NA | 0.0014 | 0 |
| NM_001004451 | OR1J1     | 0 | 0.477510222626079 | 1 | 2.00E-04 | NA | NA | 0.0014 | 0 |
| NM_198837    | ACACA     | 0 | 0.477964561562926 | 1 | 2.00E-04 | NA | NA | 0.0014 | 0 |
| NM_198838    | ACACA     | 0 | 0.477964561562926 | 1 | 2.00E-04 | NA | NA | 0.0014 | 0 |

|              |              |   |                   |   |          |    |    |        |   |
|--------------|--------------|---|-------------------|---|----------|----|----|--------|---|
| NM_016096    | ZNF706       | 0 | 0.477964561562926 | 1 | 2.00E-04 | NA | NA | 0.0014 | 0 |
| NM_001267708 | ZNF706       | 0 | 0.477964561562926 | 1 | 2.00E-04 | NA | NA | 0.0014 | 0 |
| NM_001042510 | ZNF706       | 0 | 0.477964561562926 | 1 | 2.00E-04 | NA | NA | 0.0014 | 0 |
| NM_001144758 | PHLDB1       | 0 | 0.479781917310313 | 1 | 2.00E-04 | NA | NA | 0.0014 | 0 |
| NM_001144759 | PHLDB1       | 0 | 0.479781917310313 | 1 | 2.00E-04 | NA | NA | 0.0014 | 0 |
| NM_138375    | CABLES1      | 0 | 0.479781917310313 | 1 | 2.00E-04 | NA | NA | 0.0014 | 0 |
| NM_016076    | DESI2        | 0 | 0.480690595184007 | 1 | 2.00E-04 | NA | NA | 0.0014 | 0 |
| NM_130398    | EXO1         | 0 | 0.481599273057701 | 1 | 2.00E-04 | NA | NA | 0.0014 | 0 |
| NR_003077    | SNORD99      | 0 | 0.481599273057701 | 1 | 2.00E-04 | NA | NA | 0.0014 | 0 |
| NM_004527    | MEOX1        | 0 | 0.482507950931395 | 1 | 2.00E-04 | NA | NA | 0.0014 | 0 |
| NM_013999    | MEOX1        | 0 | 0.482507950931395 | 1 | 2.00E-04 | NA | NA | 0.0014 | 0 |
| NM_001001709 | C9orf170     | 0 | 0.484325306678782 | 1 | 2.00E-04 | NA | NA | 0.0014 | 0 |
| NM_153831    | PTK2         | 0 | 0.484325306678782 | 1 | 2.00E-04 | NA | NA | 0.0014 | 0 |
| NM_005607    | PTK2         | 0 | 0.484325306678782 | 1 | 2.00E-04 | NA | NA | 0.0014 | 0 |
| NM_001199649 | PTK2         | 0 | 0.484325306678782 | 1 | 2.00E-04 | NA | NA | 0.0014 | 0 |
| NR_015441    | LOC652276    | 0 | 0.484779645615629 | 1 | 2.00E-04 | NA | NA | 0.0014 | 0 |
| NM_001166579 | AANAT        | 0 | 0.485688323489323 | 1 | 2.00E-04 | NA | NA | 0.0014 | 0 |
| NM_052885    | SLC2A13      | 0 | 0.485688323489323 | 1 | 2.00E-04 | NA | NA | 0.0014 | 0 |
| NM_002233    | KCNA4        | 0 | 0.48614266242617  | 1 | 2.00E-04 | NA | NA | 0.0014 | 0 |
| NR_029696    | MIR127       | 0 | 0.487051340299864 | 1 | 2.00E-04 | NA | NA | 0.0014 | 0 |
| NM_001143775 | CTDNBP1      | 0 | 0.488414357110404 | 1 | 2.00E-04 | NA | NA | 0.0014 | 0 |
| NM_001267709 | ZNF706       | 0 | 0.488868696047251 | 1 | 2.00E-04 | NA | NA | 0.0014 | 0 |
| NM_015343    | CTDNBP1      | 0 | 0.492503407542026 | 1 | 2.00E-04 | NA | NA | 0.0014 | 0 |
| NM_003648    | DGKD         | 0 | 0.492957746478873 | 1 | 2.00E-04 | NA | NA | 0.0014 | 0 |
| NM_001189    | NKX3-2       | 0 | 0.495229441163108 | 1 | 2.00E-04 | NA | NA | 0.0014 | 0 |
| NM_006403    | NEDD9        | 0 | 0.496138119036801 | 1 | 2.00E-04 | NA | NA | 0.0014 | 0 |
| NM_182966    | NEDD9        | 0 | 0.496138119036801 | 1 | 2.00E-04 | NA | NA | 0.0014 | 0 |
| NM_001271033 | NEDD9        | 0 | 0.496138119036801 | 1 | 2.00E-04 | NA | NA | 0.0014 | 0 |
| NM_006749    | SLC20A2      | 0 | 0.496592457973648 | 1 | 2.00E-04 | NA | NA | 0.0014 | 0 |
| NM_016329    | SFMBT1       | 0 | 0.49931849159473  | 1 | 2.00E-04 | NA | NA | 0.0014 | 0 |
| NM_203422    | LRRN4CL      | 0 | 0.499772830531577 | 1 | 2.00E-04 | NA | NA | 0.0014 | 0 |
| NM_018140    | CEP72        | 0 | 0.503861880963199 | 1 | 2.00E-04 | NA | NA | 0.0014 | 0 |
| NR_033828    | LOC100129931 | 0 | 0.504316219900045 | 1 | 2.00E-04 | NA | NA | 0.0014 | 0 |
| NM_001042646 | TRAK1        | 0 | 0.50658791458428  | 1 | 2.00E-04 | NA | NA | 0.0014 | 0 |
| NM_001265608 | TRAK1        | 0 | 0.50658791458428  | 1 | 2.00E-04 | NA | NA | 0.0014 | 0 |
| NM_002735    | PRKAR1B      | 0 | 0.507950931394821 | 1 | 2.00E-04 | NA | NA | 0.0014 | 0 |
| NM_001164762 | PRKAR1B      | 0 | 0.507950931394821 | 1 | 2.00E-04 | NA | NA | 0.0014 | 0 |
| NM_001164761 | PRKAR1B      | 0 | 0.509313948205361 | 1 | 2.00E-04 | NA | NA | 0.0014 | 0 |
| NR_003009    | SCARNA8      | 0 | 0.509768287142208 | 1 | 2.00E-04 | NA | NA | 0.0014 | 0 |
| NM_001164530 | ZNF135       | 0 | 0.511585642889596 | 1 | 2.00E-04 | NA | NA | 0.0014 | 0 |
| NM_001164529 | ZNF135       | 0 | 0.511585642889596 | 1 | 2.00E-04 | NA | NA | 0.0014 | 0 |



|              |          |                   |                   |   |          |    |    |        |   |
|--------------|----------|-------------------|-------------------|---|----------|----|----|--------|---|
| NM_001164527 | ZNF135   | 0                 | 0.511585642889596 | 1 | 2.00E-04 | NA | NA | 0.0014 | 0 |
| NM_007134    | ZNF135   | 0                 | 0.511585642889596 | 1 | 2.00E-04 | NA | NA | 0.0014 | 0 |
| NM_003436    | ZNF135   | 0                 | 0.511585642889596 | 1 | 2.00E-04 | NA | NA | 0.0014 | 0 |
| NM_000868    | HTR2C    | 0                 | 0.511585642889596 | 1 | 2.00E-04 | NA | NA | 0.0014 | 0 |
| NM_001256761 | HTR2C    | 0                 | 0.511585642889596 | 1 | 2.00E-04 | NA | NA | 0.0014 | 0 |
| NM_001256760 | HTR2C    | 0                 | 0.511585642889596 | 1 | 2.00E-04 | NA | NA | 0.0014 | 0 |
| NM_001199038 | SERINC2  | 0                 | 0.51385733757383  | 1 | 2.00E-04 | NA | NA | 0.0014 | 0 |
| NM_001190827 | FAM217B  | 0                 | 0.515220354384371 | 1 | 2.00E-04 | NA | NA | 0.0014 | 0 |
| NM_022106    | FAM217B  | 0                 | 0.515220354384371 | 1 | 2.00E-04 | NA | NA | 0.0014 | 0 |
| NM_005924    | MEOX2    | 0.093139482053612 | 0.609268514311677 | 1 | 2.00E-04 | NA | NA | 0.0014 | 0 |
| NM_006357    | UBE2E3   | 0                 | 0.522944116310768 | 1 | 2.00E-04 | NA | NA | 0.0014 | 0 |
| NM_001278555 | UBE2E3   | 0                 | 0.522944116310768 | 1 | 2.00E-04 | NA | NA | 0.0014 | 0 |
| NM_182678    | UBE2E3   | 0                 | 0.522944116310768 | 1 | 2.00E-04 | NA | NA | 0.0014 | 0 |
| NM_213649    | SFXN4    | 0                 | 0.523852794184462 | 1 | 2.00E-04 | NA | NA | 0.0014 | 0 |
| NM_031908    | C1QTNF2  | 0                 | 0.52703316674239  | 1 | 2.00E-04 | NA | NA | 0.0014 | 0 |
| NM_001171172 | CX3CR1   | 0                 | 0.530213539300318 | 1 | 2.00E-04 | NA | NA | 0.0014 | 0 |
| NM_001715    | BLK      | 0                 | 0.531122217174012 | 1 | 2.00E-04 | NA | NA | 0.0014 | 0 |
| NM_001167992 | PQBP1    | 0                 | 0.532485233984552 | 1 | 2.00E-04 | NA | NA | 0.0014 | 0 |
| NM_001267572 | TBC1D2   | 0                 | 0.532485233984552 | 1 | 2.00E-04 | NA | NA | 0.0014 | 0 |
| NM_019090    | MAP10    | 0                 | 0.533393911858246 | 1 | 2.00E-04 | NA | NA | 0.0014 | 0 |
| NM_003162    | STRN     | 0                 | 0.535211267605634 | 1 | 2.00E-04 | NA | NA | 0.0014 | 0 |
| NR_024365    | PP12613  | 0                 | 0.535665606542481 | 1 | 2.00E-04 | NA | NA | 0.0014 | 0 |
| NM_000766    | CYP2A13  | 0                 | 0.537937301226715 | 1 | 2.00E-04 | NA | NA | 0.0014 | 0 |
| NR_040063    | SMG7-AS1 | 0                 | 0.539754656974103 | 1 | 2.00E-04 | NA | NA | 0.0014 | 0 |
| NM_147163    | PSMG2    | 0                 | 0.540663334847796 | 1 | 2.00E-04 | NA | NA | 0.0014 | 0 |
| NM_001128627 | SPIRE1   | 0                 | 0.541117673784643 | 1 | 2.00E-04 | NA | NA | 0.0014 | 0 |
| NM_003412    | ZIC1     | 0                 | 0.54157201272149  | 1 | 2.00E-04 | NA | NA | 0.0014 | 0 |
| NM_001113493 | Sep 09   | 0                 | 0.543843707405725 | 1 | 2.00E-04 | NA | NA | 0.0014 | 0 |
| NM_017813    | IMPAD1   | 0                 | 0.545206724216265 | 1 | 2.00E-04 | NA | NA | 0.0014 | 0 |
| NM_001619    | ADRBK1   | 0                 | 0.546115402089959 | 1 | 2.00E-04 | NA | NA | 0.0014 | 0 |
| NM_080913    | ASGR2    | 0                 | 0.546569741026806 | 1 | 2.00E-04 | NA | NA | 0.0014 | 0 |
| NM_001181    | ASGR2    | 0                 | 0.546569741026806 | 1 | 2.00E-04 | NA | NA | 0.0014 | 0 |
| NM_001201352 | ASGR2    | 0                 | 0.546569741026806 | 1 | 2.00E-04 | NA | NA | 0.0014 | 0 |
| NM_080912    | ASGR2    | 0                 | 0.546569741026806 | 1 | 2.00E-04 | NA | NA | 0.0014 | 0 |
| NM_017655    | GIPC2    | 0                 | 0.547024079963653 | 1 | 2.00E-04 | NA | NA | 0.0014 | 0 |
| NR_030173    | MIR432   | 0                 | 0.5474784189005   | 1 | 2.00E-04 | NA | NA | 0.0014 | 0 |
| NM_152744    | SDK1     | 0                 | 0.5474784189005   | 1 | 2.00E-04 | NA | NA | 0.0014 | 0 |
| NM_005325    | HIST1H1A | 0                 | 0.5474784189005   | 1 | 2.00E-04 | NA | NA | 0.0014 | 0 |
| NM_014789    | ZNF623   | 0                 | 0.548387096774194 | 1 | 2.00E-04 | NA | NA | 0.0014 | 0 |
| NM_001258371 | ACTN3    | 0                 | 0.549750113584734 | 1 | 2.00E-04 | NA | NA | 0.0014 | 0 |
| NM_001271685 | SLC35A3  | 0                 | 0.550204452521581 | 1 | 2.00E-04 | NA | NA | 0.0014 | 0 |

|              |           |   |                   |   |          |    |    |        |   |
|--------------|-----------|---|-------------------|---|----------|----|----|--------|---|
| NM_001428    | ENO1      | 0 | 0.553839164016356 | 1 | 2.00E-04 | NA | NA | 0.0014 | 0 |
| NM_013286    | RBM15B    | 0 | 0.555202180826897 | 1 | 2.00E-04 | NA | NA | 0.0014 | 0 |
| NM_145244    | DDIT4L    | 0 | 0.557473875511131 | 1 | 2.00E-04 | NA | NA | 0.0014 | 0 |
| NM_001282987 | DHRS4     | 0 | 0.561562925942753 | 1 | 2.00E-04 | NA | NA | 0.0014 | 0 |
| NM_001282988 | DHRS4     | 0 | 0.561562925942753 | 1 | 2.00E-04 | NA | NA | 0.0014 | 0 |
| NM_021004    | DHRS4     | 0 | 0.561562925942753 | 1 | 2.00E-04 | NA | NA | 0.0014 | 0 |
| NM_001282989 | DHRS4     | 0 | 0.561562925942753 | 1 | 2.00E-04 | NA | NA | 0.0014 | 0 |
| NM_001282990 | DHRS4     | 0 | 0.561562925942753 | 1 | 2.00E-04 | NA | NA | 0.0014 | 0 |
| NM_001282991 | DHRS4     | 0 | 0.561562925942753 | 1 | 2.00E-04 | NA | NA | 0.0014 | 0 |
| NM_001278297 | FAM131B   | 0 | 0.562925942753294 | 1 | 2.00E-04 | NA | NA | 0.0014 | 0 |
| NM_001031690 | FAM131B   | 0 | 0.562925942753294 | 1 | 2.00E-04 | NA | NA | 0.0014 | 0 |
| NM_001097622 | OCM       | 0 | 0.565197637437528 | 1 | 2.00E-04 | NA | NA | 0.0014 | 0 |
| NM_001136215 | ARTN      | 0 | 0.566106315311222 | 1 | 2.00E-04 | NA | NA | 0.0014 | 0 |
| NM_057091    | ARTN      | 0 | 0.566106315311222 | 1 | 2.00E-04 | NA | NA | 0.0014 | 0 |
| NM_057090    | ARTN      | 0 | 0.566106315311222 | 1 | 2.00E-04 | NA | NA | 0.0014 | 0 |
| NM_006155    | Sep 02    | 0 | 0.567014993184916 | 1 | 2.00E-04 | NA | NA | 0.0014 | 0 |
| NM_001008491 | Sep 02    | 0 | 0.567014993184916 | 1 | 2.00E-04 | NA | NA | 0.0014 | 0 |
| NM_003707    | RUVBL1    | 0 | 0.568832348932303 | 1 | 2.00E-04 | NA | NA | 0.0014 | 0 |
| NM_003341    | UBE2E1    | 0 | 0.572467060427079 | 1 | 2.00E-04 | NA | NA | 0.0014 | 0 |
| NM_182666    | UBE2E1    | 0 | 0.572467060427079 | 1 | 2.00E-04 | NA | NA | 0.0014 | 0 |
| NR_024347    | LINC00304 | 0 | 0.576101771921854 | 1 | 2.00E-04 | NA | NA | 0.0014 | 0 |
| NM_001278512 | AP3B2     | 0 | 0.577010449795547 | 1 | 2.00E-04 | NA | NA | 0.0014 | 0 |
| NM_004644    | AP3B2     | 0 | 0.577010449795547 | 1 | 2.00E-04 | NA | NA | 0.0014 | 0 |
| NM_001278511 | AP3B2     | 0 | 0.577010449795547 | 1 | 2.00E-04 | NA | NA | 0.0014 | 0 |
| NM_001014279 | ANXA2R    | 0 | 0.582916855974557 | 1 | 2.00E-04 | NA | NA | 0.0014 | 0 |
| NM_001001577 | PDE9A     | 0 | 0.583825533848251 | 1 | 2.00E-04 | NA | NA | 0.0014 | 0 |
| NM_001001573 | PDE9A     | 0 | 0.583825533848251 | 1 | 2.00E-04 | NA | NA | 0.0014 | 0 |
| NM_001001569 | PDE9A     | 0 | 0.583825533848251 | 1 | 2.00E-04 | NA | NA | 0.0014 | 0 |
| NM_002606    | PDE9A     | 0 | 0.583825533848251 | 1 | 2.00E-04 | NA | NA | 0.0014 | 0 |
| NM_001001582 | PDE9A     | 0 | 0.583825533848251 | 1 | 2.00E-04 | NA | NA | 0.0014 | 0 |
| NM_001001571 | PDE9A     | 0 | 0.583825533848251 | 1 | 2.00E-04 | NA | NA | 0.0014 | 0 |
| NM_001001572 | PDE9A     | 0 | 0.583825533848251 | 1 | 2.00E-04 | NA | NA | 0.0014 | 0 |
| NM_001001579 | PDE9A     | 0 | 0.583825533848251 | 1 | 2.00E-04 | NA | NA | 0.0014 | 0 |
| NM_001001570 | PDE9A     | 0 | 0.583825533848251 | 1 | 2.00E-04 | NA | NA | 0.0014 | 0 |
| NM_001001576 | PDE9A     | 0 | 0.583825533848251 | 1 | 2.00E-04 | NA | NA | 0.0014 | 0 |
| NM_001001580 | PDE9A     | 0 | 0.583825533848251 | 1 | 2.00E-04 | NA | NA | 0.0014 | 0 |
| NM_001001585 | PDE9A     | 0 | 0.583825533848251 | 1 | 2.00E-04 | NA | NA | 0.0014 | 0 |
| NM_001001584 | PDE9A     | 0 | 0.583825533848251 | 1 | 2.00E-04 | NA | NA | 0.0014 | 0 |
| NM_001001583 | PDE9A     | 0 | 0.583825533848251 | 1 | 2.00E-04 | NA | NA | 0.0014 | 0 |
| NM_001001581 | PDE9A     | 0 | 0.583825533848251 | 1 | 2.00E-04 | NA | NA | 0.0014 | 0 |
| NM_001001578 | PDE9A     | 0 | 0.583825533848251 | 1 | 2.00E-04 | NA | NA | 0.0014 | 0 |

|              |                     |   |                   |   |          |    |    |        |   |
|--------------|---------------------|---|-------------------|---|----------|----|----|--------|---|
| NM_001001575 | <i>PDE9A</i>        | 0 | 0.583825533848251 | 1 | 2.00E-04 | NA | NA | 0.0014 | 0 |
| NM_001001574 | <i>PDE9A</i>        | 0 | 0.583825533848251 | 1 | 2.00E-04 | NA | NA | 0.0014 | 0 |
| NM_001001568 | <i>PDE9A</i>        | 0 | 0.583825533848251 | 1 | 2.00E-04 | NA | NA | 0.0014 | 0 |
| NM_001001567 | <i>PDE9A</i>        | 0 | 0.583825533848251 | 1 | 2.00E-04 | NA | NA | 0.0014 | 0 |
| NM_031231    | <i>NECAB3</i>       | 0 | 0.585188550658791 | 1 | 2.00E-04 | NA | NA | 0.0014 | 0 |
| NM_031232    | <i>NECAB3</i>       | 0 | 0.585188550658791 | 1 | 2.00E-04 | NA | NA | 0.0014 | 0 |
| NR_015447    | <i>LOC153684</i>    | 0 | 0.587914584279873 | 1 | 2.00E-04 | NA | NA | 0.0014 | 0 |
| NM_004415    | <i>DSP</i>          | 0 | 0.587914584279873 | 1 | 2.00E-04 | NA | NA | 0.0014 | 0 |
| NM_001008844 | <i>DSP</i>          | 0 | 0.587914584279873 | 1 | 2.00E-04 | NA | NA | 0.0014 | 0 |
| NM_173800    | <i>AQPEP</i>        | 0 | 0.58973194002726  | 1 | 2.00E-04 | NA | NA | 0.0014 | 0 |
| NM_003529    | <i>HIST1H3A</i>     | 0 | 0.58973194002726  | 1 | 2.00E-04 | NA | NA | 0.0014 | 0 |
| NR_026973    | <i>HLA-F-AS1</i>    | 0 | 0.592912312585189 | 1 | 2.00E-04 | NA | NA | 0.0014 | 0 |
| NR_026972    | <i>HLA-F-AS1</i>    | 0 | 0.592912312585189 | 1 | 2.00E-04 | NA | NA | 0.0014 | 0 |
| NM_152284    | <i>CHMP4C</i>       | 0 | 0.597001363016811 | 1 | 2.00E-04 | NA | NA | 0.0014 | 0 |
| NR_033377    | <i>LINC00898</i>    | 0 | 0.599273057701045 | 1 | 2.00E-04 | NA | NA | 0.0014 | 0 |
| NM_005160    | <i>ADRBK2</i>       | 0 | 0.607905497501136 | 1 | 2.00E-04 | NA | NA | 0.0014 | 0 |
| NR_003687    | <i>SNORD19B</i>     | 0 | 0.608359836437983 | 1 | 2.00E-04 | NA | NA | 0.0014 | 0 |
| NM_001204197 | <i>NBEA</i>         | 0 | 0.612448886869605 | 1 | 2.00E-04 | NA | NA | 0.0014 | 0 |
| NM_015995    | <i>KLF13</i>        | 0 | 0.625624716038164 | 1 | 2.00E-04 | NA | NA | 0.0014 | 0 |
| NM_032638    | <i>GATA2</i>        | 0 | 0.627896410722399 | 1 | 2.00E-04 | NA | NA | 0.0014 | 0 |
| NM_032326    | <i>TMEM175</i>      | 0 | 0.634257155838255 | 1 | 2.00E-04 | NA | NA | 0.0014 | 0 |
| NR_002189    | <i>SUMO1P1</i>      | 0 | 0.639709223080418 | 1 | 2.00E-04 | NA | NA | 0.0014 | 0 |
| NM_001105513 | <i>TTC21A</i>       | 0 | 0.648796001817356 | 1 | 2.00E-04 | NA | NA | 0.0014 | 0 |
| NM_145755    | <i>TTC21A</i>       | 0 | 0.648796001817356 | 1 | 2.00E-04 | NA | NA | 0.0014 | 0 |
| NM_001271318 | <i>ZNF512</i>       | 0 | 0.679236710586097 | 1 | 2.00E-04 | NA | NA | 0.0014 | 0 |
| NM_032434    | <i>ZNF512</i>       | 0 | 0.679236710586097 | 1 | 2.00E-04 | NA | NA | 0.0014 | 0 |
| NM_001271288 | <i>ZNF512</i>       | 0 | 0.679236710586097 | 1 | 2.00E-04 | NA | NA | 0.0014 | 0 |
| NM_001271287 | <i>ZNF512</i>       | 0 | 0.679236710586097 | 1 | 2.00E-04 | NA | NA | 0.0014 | 0 |
| NM_001271289 | <i>ZNF512</i>       | 0 | 0.679236710586097 | 1 | 2.00E-04 | NA | NA | 0.0014 | 0 |
| NM_001271286 | <i>ZNF512</i>       | 0 | 0.679236710586097 | 1 | 2.00E-04 | NA | NA | 0.0014 | 0 |
| NM_153268    | <i>PLCXD2</i>       | 0 | 0.679691049522944 | 1 | 2.00E-04 | NA | NA | 0.0014 | 0 |
| NM_001185106 | <i>PLCXD2</i>       | 0 | 0.679691049522944 | 1 | 2.00E-04 | NA | NA | 0.0014 | 0 |
| NM_001190918 | <i>THRA</i>         | 0 | 0.683325761017719 | 1 | 2.00E-04 | NA | NA | 0.0014 | 0 |
| NM_003250    | <i>THRA</i>         | 0 | 0.683325761017719 | 1 | 2.00E-04 | NA | NA | 0.0014 | 0 |
| NM_199334    | <i>THRA</i>         | 0 | 0.683325761017719 | 1 | 2.00E-04 | NA | NA | 0.0014 | 0 |
| NM_001190919 | <i>THRA</i>         | 0 | 0.688323489323035 | 1 | 2.00E-04 | NA | NA | 0.0014 | 0 |
| NM_030810    | <i>TXNDC5</i>       | 0 | 0.692412539754657 | 1 | 2.00E-04 | NA | NA | 0.0014 | 0 |
| NM_001345    | <i>DGKA</i>         | 0 | 0.696047251249432 | 1 | 2.00E-04 | NA | NA | 0.0014 | 0 |
| NM_004503    | <i>HOXC6</i>        | 0 | 0.722398909586552 | 1 | 2.00E-04 | NA | NA | 0.0014 | 0 |
| NM_002250    | <i>KCNN4</i>        | 0 | 0.791004089050432 | 1 | 2.00E-04 | NA | NA | 0.0014 | 0 |
| NR_027439    | <i>LOC100272216</i> | 0 | 0.851431167651068 | 1 | 2.00E-04 | NA | NA | 0.0014 | 0 |

Table S1: Methylation data showing differential methylated transcripts between SAT and OVAT in lean/overweight subjects expressed by a ratio of hyper- and hypo-methylation per promoter. fdr/FDR= false discovery rate.

Supplementary Table 2

**Methylation in obese SAT vs. OVAT**

| Transcript   | GeneName         | obese_in_sc       | obese_in_vis | p_value_in_sc | p_value_in_vis | fdr_in_sc | Fdr_in_sc | fdr_in_vis | Fdr_in_vis |
|--------------|------------------|-------------------|--------------|---------------|----------------|-----------|-----------|------------|------------|
| NM_020808    | <i>SIPA1L2</i>   | 1                 | 0            | 2.00E-04      | 1              | 9.00E-04  | 0         | NA         | NA         |
| NM_001584    | <i>MPPED2</i>    | 1                 | 0            | 2.00E-04      | 1              | 9.00E-04  | 0         | NA         | NA         |
| NR_103466    | <i>NBPF13P</i>   | 0.989095865515675 | 0            | 2.00E-04      | 1              | 9.00E-04  | 0         | NA         | NA         |
| NM_000220    | <i>KCNJ1</i>     | 0.948205361199455 | 0            | 2.00E-04      | 1              | 9.00E-04  | 0         | NA         | NA         |
| NM_001004719 | <i>OR4M2</i>     | 0.933666515220354 | 0            | 2.00E-04      | 1              | 9.00E-04  | 0         | NA         | NA         |
| NM_004009    | <i>DMD</i>       | 0.917310313493866 | 0            | 2.00E-04      | 1              | 9.00E-04  | 0         | NA         | NA         |
| NM_004010    | <i>DMD</i>       | 0.917310313493866 | 0            | 2.00E-04      | 1              | 9.00E-04  | 0         | NA         | NA         |
| NR_029609    | <i>MIR10B</i>    | 0.902317128577919 | 0            | 2.00E-04      | 1              | 9.00E-04  | 0         | NA         | NA         |
| NM_130897    | <i>DYNLRB2</i>   | 0.884143571104044 | 0            | 2.00E-04      | 1              | 9.00E-04  | 0         | NA         | NA         |
| NM_001005495 | <i>OR2T3</i>     | 0.879600181735575 | 0            | 2.00E-04      | 1              | 9.00E-04  | 0         | NA         | NA         |
| NM_001135091 | <i>MUC15</i>     | 0.872330758746025 | 0            | 2.00E-04      | 1              | 9.00E-04  | 0         | NA         | NA         |
| NM_001135092 | <i>MUC15</i>     | 0.872330758746025 | 0            | 2.00E-04      | 1              | 9.00E-04  | 0         | NA         | NA         |
| NM_145650    | <i>MUC15</i>     | 0.872330758746025 | 0            | 2.00E-04      | 1              | 9.00E-04  | 0         | NA         | NA         |
| NR_033738    | <i>LOC440300</i> | 0.868696047251249 | 0            | 2.00E-04      | 1              | 9.00E-04  | 0         | NA         | NA         |
| NM_001195260 | <i>PDE4DIP</i>   | 0.859609268514312 | 0            | 2.00E-04      | 1              | 9.00E-04  | 0         | NA         | NA         |
| NM_001261399 | <i>PRB4</i>      | 0.849159472966833 | 0            | 2.00E-04      | 1              | 9.00E-04  | 0         | NA         | NA         |
| NM_002723    | <i>PRB4</i>      | 0.849159472966833 | 0            | 2.00E-04      | 1              | 9.00E-04  | 0         | NA         | NA         |
| NM_032681    | <i>TRIM51</i>    | 0.826442526124489 | 0            | 2.00E-04      | 1              | 9.00E-04  | 0         | NA         | NA         |
| NM_001281429 | <i>PCED1B</i>    | 0.820536119945479 | 0            | 2.00E-04      | 1              | 9.00E-04  | 0         | NA         | NA         |
| NM_138371    | <i>PCED1B</i>    | 0.820536119945479 | 0            | 2.00E-04      | 1              | 9.00E-04  | 0         | NA         | NA         |
| NM_001037331 | <i>SMIM21</i>    | 0.801908223534757 | 0            | 2.00E-04      | 1              | 9.00E-04  | 0         | NA         | NA         |
| NM_001110213 | <i>PRH2</i>      | 0.791004089050432 | 0            | 2.00E-04      | 1              | 9.00E-04  | 0         | NA         | NA         |
| NM_005042    | <i>PRH2</i>      | 0.791004089050432 | 0            | 2.00E-04      | 1              | 9.00E-04  | 0         | NA         | NA         |
| NM_080387    | <i>CLEC4D</i>    | 0.783280327124035 | 0            | 2.00E-04      | 1              | 9.00E-04  | 0         | NA         | NA         |
| NM_172060    | <i>EYA1</i>      | 0.761926397092231 | 0            | 2.00E-04      | 1              | 9.00E-04  | 0         | NA         | NA         |
| NM_172058    | <i>EYA1</i>      | 0.761926397092231 | 0            | 2.00E-04      | 1              | 9.00E-04  | 0         | NA         | NA         |
| NM_172059    | <i>EYA1</i>      | 0.761926397092231 | 0            | 2.00E-04      | 1              | 9.00E-04  | 0         | NA         | NA         |
| NM_001098538 | <i>PRR4</i>      | 0.74602453430259  | 0            | 2.00E-04      | 1              | 9.00E-04  | 0         | NA         | NA         |
| NM_007244    | <i>PRR4</i>      | 0.74602453430259  | 0            | 2.00E-04      | 1              | 9.00E-04  | 0         | NA         | NA         |
| NM_130438    | <i>DYRK1A</i>    | 0.723761926397092 | 0            | 2.00E-04      | 1              | 9.00E-04  | 0         | NA         | NA         |
| NM_001396    | <i>DYRK1A</i>    | 0.723761926397092 | 0            | 2.00E-04      | 1              | 9.00E-04  | 0         | NA         | NA         |
| NM_001004697 | <i>OR2T5</i>     | 0.721944570649705 | 0            | 2.00E-04      | 1              | 9.00E-04  | 0         | NA         | NA         |
| NM_014621    | <i>HOXD4</i>     | 0.721035892776011 | 0            | 2.00E-04      | 1              | 9.00E-04  | 0         | NA         | NA         |
| NM_030661    | <i>HOXA3</i>     | 0.71830985915493  | 0            | 2.00E-04      | 1              | 9.00E-04  | 0         | NA         | NA         |
| NM_000390    | <i>CHM</i>       | 0.710586097228532 | 0            | 2.00E-04      | 1              | 9.00E-04  | 0         | NA         | NA         |
| NM_001145414 | <i>CHM</i>       | 0.710586097228532 | 0            | 2.00E-04      | 1              | 9.00E-04  | 0         | NA         | NA         |
| NM_006614    | <i>CHL1</i>      | 0.706951385733757 | 0            | 2.00E-04      | 1              | 9.00E-04  | 0         | NA         | NA         |

|              |               |                   |   |          |   |          |   |    |    |
|--------------|---------------|-------------------|---|----------|---|----------|---|----|----|
| NM_001253387 | CHL1          | 0.706951385733757 | 0 | 2.00E-04 | 1 | 9.00E-04 | 0 | NA | NA |
| NM_001004690 | OR2M5         | 0.700136301681054 | 0 | 2.00E-04 | 1 | 9.00E-04 | 0 | NA | NA |
| NR_039789    | MIR4646       | 0.692866878691504 | 0 | 2.00E-04 | 1 | 9.00E-04 | 0 | NA | NA |
| NM_006032    | CPNE6         | 0.686506133575647 | 0 | 2.00E-04 | 1 | 9.00E-04 | 0 | NA | NA |
| NR_045125    | HIST1H2APS1   | 0.681508405270332 | 0 | 2.00E-04 | 1 | 9.00E-04 | 0 | NA | NA |
| NM_031891    | CDH20         | 0.669241253975466 | 0 | 2.00E-04 | 1 | 9.00E-04 | 0 | NA | NA |
| NM_181676    | PPP2R2B       | 0.666515220354384 | 0 | 2.00E-04 | 1 | 9.00E-04 | 0 | NA | NA |
| NM_181674    | PPP2R2B       | 0.666515220354384 | 0 | 2.00E-04 | 1 | 9.00E-04 | 0 | NA | NA |
| NM_058206    | SPAG11B       | 0.656065424806906 | 0 | 2.00E-04 | 1 | 9.00E-04 | 0 | NA | NA |
| NM_058207    | SPAG11B       | 0.656065424806906 | 0 | 2.00E-04 | 1 | 9.00E-04 | 0 | NA | NA |
| NM_001006939 | LRRC18        | 0.649250340754203 | 0 | 2.00E-04 | 1 | 9.00E-04 | 0 | NA | NA |
| NM_001080415 | U2SURP        | 0.646524307133121 | 0 | 2.00E-04 | 1 | 9.00E-04 | 0 | NA | NA |
| NR_028067    | OR4N3P        | 0.644706951385734 | 0 | 2.00E-04 | 1 | 9.00E-04 | 0 | NA | NA |
| NM_145892    | RBFOX1        | 0.643343934575193 | 0 | 2.00E-04 | 1 | 9.00E-04 | 0 | NA | NA |
| NM_145891    | RBFOX1        | 0.643343934575193 | 0 | 2.00E-04 | 1 | 9.00E-04 | 0 | NA | NA |
| NM_145893    | RBFOX1        | 0.643343934575193 | 0 | 2.00E-04 | 1 | 9.00E-04 | 0 | NA | NA |
| NM_033225    | CSMD1         | 0.642435256701499 | 0 | 2.00E-04 | 1 | 9.00E-04 | 0 | NA | NA |
| NM_002054    | GCG           | 0.639709223080418 | 0 | 2.00E-04 | 1 | 9.00E-04 | 0 | NA | NA |
| NM_001172517 | SATB2         | 0.63652885052249  | 0 | 2.00E-04 | 1 | 9.00E-04 | 0 | NA | NA |
| NM_001172501 | SLC6A2        | 0.635165833711949 | 0 | 2.00E-04 | 1 | 9.00E-04 | 0 | NA | NA |
| NM_001277348 | LOC100996485  | 0.624716038164471 | 0 | 2.00E-04 | 1 | 9.00E-04 | 0 | NA | NA |
| NM_001159644 | MCTP2         | 0.619718309859155 | 0 | 2.00E-04 | 1 | 9.00E-04 | 0 | NA | NA |
| NM_001207006 | IL21          | 0.611540208995911 | 0 | 2.00E-04 | 1 | 9.00E-04 | 0 | NA | NA |
| NM_021803    | IL21          | 0.611540208995911 | 0 | 2.00E-04 | 1 | 9.00E-04 | 0 | NA | NA |
| NM_016945    | TAS2R16       | 0.610631531122217 | 0 | 2.00E-04 | 1 | 9.00E-04 | 0 | NA | NA |
| NM_001004694 | OR2T29        | 0.609268514311677 | 0 | 2.00E-04 | 1 | 9.00E-04 | 0 | NA | NA |
| NM_023921    | TAS2R10       | 0.606088141753748 | 0 | 2.00E-04 | 1 | 9.00E-04 | 0 | NA | NA |
| NM_021005    | NR2F2         | 0.603362108132667 | 0 | 2.00E-04 | 1 | 9.00E-04 | 0 | NA | NA |
| NM_002148    | HOXD10        | 0.598364379827351 | 0 | 2.00E-04 | 1 | 9.00E-04 | 0 | NA | NA |
| NM_153038    | CCDC140       | 0.598364379827351 | 0 | 2.00E-04 | 1 | 9.00E-04 | 0 | NA | NA |
| NM_058248    | DNASE2B       | 0.597001363016811 | 0 | 2.00E-04 | 1 | 9.00E-04 | 0 | NA | NA |
| NM_001001961 | OR13C3        | 0.597001363016811 | 0 | 2.00E-04 | 1 | 9.00E-04 | 0 | NA | NA |
| NM_001025077 | CELF2         | 0.596547024079964 | 0 | 2.00E-04 | 1 | 9.00E-04 | 0 | NA | NA |
| NM_001167924 | CMSS1         | 0.591094956837801 | 0 | 2.00E-04 | 1 | 9.00E-04 | 0 | NA | NA |
| NM_001004490 | OR2AG2        | 0.585642889595638 | 0 | 2.00E-04 | 1 | 9.00E-04 | 0 | NA | NA |
| NM_172003    | CBWD2         | 0.577010449795547 | 0 | 2.00E-04 | 1 | 9.00E-04 | 0 | NA | NA |
| NM_172311    | STON1-GTF2A1L | 0.575647432985007 | 0 | 2.00E-04 | 1 | 9.00E-04 | 0 | NA | NA |
| NM_022444    | SLC13A1       | 0.573375738300772 | 0 | 2.00E-04 | 1 | 9.00E-04 | 0 | NA | NA |
| NR_046228    | ANKRD20A12P   | 0.572012721490232 | 0 | 2.00E-04 | 1 | 9.00E-04 | 0 | NA | NA |
| NM_024297    | PHF23         | 0.570649704679691 | 0 | 2.00E-04 | 1 | 9.00E-04 | 0 | NA | NA |
| NM_001284517 | PHF23         | 0.570649704679691 | 0 | 2.00E-04 | 1 | 9.00E-04 | 0 | NA | NA |

|              |            |                   |   |          |   |          |   |    |    |
|--------------|------------|-------------------|---|----------|---|----------|---|----|----|
| NM_023013    | PRAMEF1    | 0.565197637437528 | 0 | 2.00E-04 | 1 | 9.00E-04 | 0 | NA | NA |
| NM_001242916 | ZFAND6     | 0.562925942753294 | 0 | 2.00E-04 | 1 | 9.00E-04 | 0 | NA | NA |
| NM_001242915 | ZFAND6     | 0.562925942753294 | 0 | 2.00E-04 | 1 | 9.00E-04 | 0 | NA | NA |
| NM_172020    | POM121     | 0.562925942753294 | 0 | 2.00E-04 | 1 | 9.00E-04 | 0 | NA | NA |
| NM_021240    | DMRT3      | 0.557019536574284 | 0 | 2.00E-04 | 1 | 9.00E-04 | 0 | NA | NA |
| NM_139175    | RNF133     | 0.556110858700591 | 0 | 2.00E-04 | 1 | 9.00E-04 | 0 | NA | NA |
| NM_004616    | TSPAN8     | 0.555202180826897 | 0 | 2.00E-04 | 1 | 9.00E-04 | 0 | NA | NA |
| NM_001144775 | ELAVL4     | 0.55474784189005  | 0 | 2.00E-04 | 1 | 9.00E-04 | 0 | NA | NA |
| NM_018371    | CSGALNACT1 | 0.553839164016356 | 0 | 2.00E-04 | 1 | 9.00E-04 | 0 | NA | NA |
| NM_015350    | LRRRC8B    | 0.552021808268969 | 0 | 2.00E-04 | 1 | 9.00E-04 | 0 | NA | NA |
| NR_102743    | NR2F2-AS1  | 0.552021808268969 | 0 | 2.00E-04 | 1 | 9.00E-04 | 0 | NA | NA |
| NR_102744    | NR2F2-AS1  | 0.552021808268969 | 0 | 2.00E-04 | 1 | 9.00E-04 | 0 | NA | NA |
| NM_001137548 | FAM25C     | 0.549295774647887 | 0 | 2.00E-04 | 1 | 9.00E-04 | 0 | NA | NA |
| NM_001137549 | FAM25G     | 0.549295774647887 | 0 | 2.00E-04 | 1 | 9.00E-04 | 0 | NA | NA |
| NM_001243514 | ESRRG      | 0.5474784189005   | 0 | 2.00E-04 | 1 | 9.00E-04 | 0 | NA | NA |
| NM_001127711 | TMEM14B    | 0.546569741026806 | 0 | 2.00E-04 | 1 | 9.00E-04 | 0 | NA | NA |
| NM_030969    | TMEM14B    | 0.546569741026806 | 0 | 2.00E-04 | 1 | 9.00E-04 | 0 | NA | NA |
| NM_001099431 | CLEC1B     | 0.546569741026806 | 0 | 2.00E-04 | 1 | 9.00E-04 | 0 | NA | NA |
| NM_016509    | CLEC1B     | 0.546569741026806 | 0 | 2.00E-04 | 1 | 9.00E-04 | 0 | NA | NA |
| NM_001004759 | OR51T1     | 0.546115402089959 | 0 | 2.00E-04 | 1 | 9.00E-04 | 0 | NA | NA |
| NM_021952    | ELAVL4     | 0.545206724216265 | 0 | 2.00E-04 | 1 | 9.00E-04 | 0 | NA | NA |
| NM_001144774 | ELAVL4     | 0.545206724216265 | 0 | 2.00E-04 | 1 | 9.00E-04 | 0 | NA | NA |
| NM_001004052 | OR52B2     | 0.543843707405725 | 0 | 2.00E-04 | 1 | 9.00E-04 | 0 | NA | NA |
| NR_024128    | OR3A4P     | 0.543389368468878 | 0 | 2.00E-04 | 1 | 9.00E-04 | 0 | NA | NA |
| NM_147180    | PPP3R2     | 0.543389368468878 | 0 | 2.00E-04 | 1 | 9.00E-04 | 0 | NA | NA |
| NR_003921    | PMCHL1     | 0.542480690595184 | 0 | 2.00E-04 | 1 | 9.00E-04 | 0 | NA | NA |
| NM_175884    | CCDC71L    | 0.54157201272149  | 0 | 2.00E-04 | 1 | 9.00E-04 | 0 | NA | NA |
| NM_004934    | CDH18      | 0.54020899591095  | 0 | 2.00E-04 | 1 | 9.00E-04 | 0 | NA | NA |
| NM_001167667 | CDH18      | 0.54020899591095  | 0 | 2.00E-04 | 1 | 9.00E-04 | 0 | NA | NA |
| NM_001043    | SLC6A2     | 0.538845979100409 | 0 | 2.00E-04 | 1 | 9.00E-04 | 0 | NA | NA |
| NM_020977    | ANK2       | 0.538845979100409 | 0 | 2.00E-04 | 1 | 9.00E-04 | 0 | NA | NA |
| NM_001148    | ANK2       | 0.538845979100409 | 0 | 2.00E-04 | 1 | 9.00E-04 | 0 | NA | NA |
| NM_207316    | TMEM207    | 0.538391640163562 | 0 | 2.00E-04 | 1 | 9.00E-04 | 0 | NA | NA |
| NM_176813    | AGR3       | 0.538391640163562 | 0 | 2.00E-04 | 1 | 9.00E-04 | 0 | NA | NA |
| NM_052939    | FCRL3      | 0.535665606542481 | 0 | 2.00E-04 | 1 | 9.00E-04 | 0 | NA | NA |
| NM_020990    | CKMT1B     | 0.532030895047706 | 0 | 2.00E-04 | 1 | 9.00E-04 | 0 | NA | NA |
| NM_001005189 | OR6Y1      | 0.531576556110859 | 0 | 2.00E-04 | 1 | 9.00E-04 | 0 | NA | NA |
| NM_001017418 | SPRR2B     | 0.530213539300318 | 0 | 2.00E-04 | 1 | 9.00E-04 | 0 | NA | NA |
| NM_001164345 | ZBTB20     | 0.530213539300318 | 0 | 2.00E-04 | 1 | 9.00E-04 | 0 | NA | NA |
| NM_001164344 | ZBTB20     | 0.530213539300318 | 0 | 2.00E-04 | 1 | 9.00E-04 | 0 | NA | NA |
| NM_001446    | FABP7      | 0.529759200363471 | 0 | 2.00E-04 | 1 | 9.00E-04 | 0 | NA | NA |

|              |              |                   |                    |          |   |          |   |    |    |
|--------------|--------------|-------------------|--------------------|----------|---|----------|---|----|----|
| NM_207422    | FLJ44635     | 0.525670149931849 | 0                  | 2.00E-04 | 1 | 9.00E-04 | 0 | NA | NA |
| NM_001001919 | OR13C4       | 0.525670149931849 | 0                  | 2.00E-04 | 1 | 9.00E-04 | 0 | NA | NA |
| NM_198451    | FOXR2        | 0.522944116310768 | 0                  | 2.00E-04 | 1 | 9.00E-04 | 0 | NA | NA |
| NM_199354    | PRB1         | 0.522489777373921 | 0                  | 2.00E-04 | 1 | 9.00E-04 | 0 | NA | NA |
| NM_199353    | PRB1         | 0.522489777373921 | 0                  | 2.00E-04 | 1 | 9.00E-04 | 0 | NA | NA |
| NM_005039    | PRB1         | 0.522489777373921 | 0                  | 2.00E-04 | 1 | 9.00E-04 | 0 | NA | NA |
| NM_003551    | NME5         | 0.521581099500227 | 0                  | 2.00E-04 | 1 | 9.00E-04 | 0 | NA | NA |
| NM_001001658 | OR9A2        | 0.52112676056338  | 0                  | 2.00E-04 | 1 | 9.00E-04 | 0 | NA | NA |
| NR_002718    | TDGF1P3      | 0.519309404815993 | 0                  | 2.00E-04 | 1 | 9.00E-04 | 0 | NA | NA |
| NR_103775    | LOC100505984 | 0.518855065879146 | 0                  | 2.00E-04 | 1 | 9.00E-04 | 0 | NA | NA |
| NM_001145672 | SORBS2       | 0.518400726942299 | 0                  | 2.00E-04 | 1 | 9.00E-04 | 0 | NA | NA |
| NR_103711    | PAPPA-AS1    | 0.516129032258065 | 0                  | 2.00E-04 | 1 | 9.00E-04 | 0 | NA | NA |
| NR_024206    | LINC00152    | 0.514766015447524 | 0                  | 2.00E-04 | 1 | 9.00E-04 | 0 | NA | NA |
| NR_024205    | LINC00152    | 0.514766015447524 | 0                  | 2.00E-04 | 1 | 9.00E-04 | 0 | NA | NA |
| NR_024204    | LINC00152    | 0.514766015447524 | 0                  | 2.00E-04 | 1 | 9.00E-04 | 0 | NA | NA |
| NM_031413    | CECR2        | 0.514311676510677 | 0                  | 2.00E-04 | 1 | 9.00E-04 | 0 | NA | NA |
| NM_006557    | DMRT2        | 0.51385733757383  | 0                  | 2.00E-04 | 1 | 9.00E-04 | 0 | NA | NA |
| NM_024873    | TNIP3        | 0.512039981826443 | 0                  | 2.00E-04 | 1 | 9.00E-04 | 0 | NA | NA |
| NM_004904    | CREB5        | 0.511131303952749 | 0                  | 2.00E-04 | 1 | 9.00E-04 | 0 | NA | NA |
| NM_001130865 | DMRT2        | 0.510222626079055 | 0                  | 2.00E-04 | 1 | 9.00E-04 | 0 | NA | NA |
| NM_001164404 | GOLGA6C      | 0.507042253521127 | 0                  | 2.00E-04 | 1 | 9.00E-04 | 0 | NA | NA |
| NM_001114978 | TP63         | 0.506133575647433 | 0                  | 2.00E-04 | 1 | 9.00E-04 | 0 | NA | NA |
| NM_003722    | TP63         | 0.506133575647433 | 0                  | 2.00E-04 | 1 | 9.00E-04 | 0 | NA | NA |
| NM_001114979 | TP63         | 0.506133575647433 | 0                  | 2.00E-04 | 1 | 9.00E-04 | 0 | NA | NA |
| NR_002601    | FMO6P        | 0.504770558836892 | 0                  | 2.00E-04 | 1 | 9.00E-04 | 0 | NA | NA |
| NM_001243722 | TP53TG3D     | 0.504770558836892 | 0                  | 2.00E-04 | 1 | 9.00E-04 | 0 | NA | NA |
| NR_037889    | LOC285626    | 0.504770558836892 | 0                  | 2.00E-04 | 1 | 9.00E-04 | 0 | NA | NA |
| NM_001018116 | MURC         | 0.503407542026352 | 0                  | 2.00E-04 | 1 | 9.00E-04 | 0 | NA | NA |
| NM_152284    | CHMP4C       | 0.502498864152658 | 0                  | 2.00E-04 | 1 | 9.00E-04 | 0 | NA | NA |
| NM_006248    | PRB2         | 0.497955474784189 | 0                  | 2.00E-04 | 1 | 9.00E-04 | 0 | NA | NA |
| NM_001207016 | PTPRR        | 0.496592457973648 | 0                  | 2.00E-04 | 1 | 9.00E-04 | 0 | NA | NA |
| NM_001278495 | NUTM2B       | 0.578373466606088 | 0.0826896865061336 | 2.00E-04 | 1 | 9.00E-04 | 0 | NA | NA |
| NM_014011    | SOCS5        | 0.493866424352567 | 0                  | 2.00E-04 | 1 | 9.00E-04 | 0 | NA | NA |
| NM_001243392 | SLC6A13      | 0.493866424352567 | 0                  | 2.00E-04 | 1 | 9.00E-04 | 0 | NA | NA |
| NM_001190997 | SLC6A13      | 0.493866424352567 | 0                  | 2.00E-04 | 1 | 9.00E-04 | 0 | NA | NA |
| NM_016615    | SLC6A13      | 0.493866424352567 | 0                  | 2.00E-04 | 1 | 9.00E-04 | 0 | NA | NA |
| NM_001040704 | DEFB106B     | 0.493866424352567 | 0                  | 2.00E-04 | 1 | 9.00E-04 | 0 | NA | NA |
| NM_152251    | DEFB106A     | 0.493866424352567 | 0                  | 2.00E-04 | 1 | 9.00E-04 | 0 | NA | NA |
| NR_040085    | TRG-AS1      | 0.492957746478873 | 0                  | 2.00E-04 | 1 | 9.00E-04 | 0 | NA | NA |
| NM_001005325 | OR6M1        | 0.491594729668333 | 0                  | 2.00E-04 | 1 | 9.00E-04 | 0 | NA | NA |
| NM_001253829 | PTPDC1       | 0.491140390731486 | 0                  | 2.00E-04 | 1 | 9.00E-04 | 0 | NA | NA |



|              |                   |                   |   |          |   |          |   |    |    |
|--------------|-------------------|-------------------|---|----------|---|----------|---|----|----|
| NM_152422    | <i>PTPDC1</i>     | 0.491140390731486 | 0 | 2.00E-04 | 1 | 9.00E-04 | 0 | NA | NA |
| NM_000084    | <i>CLCN5</i>      | 0.489777373920945 | 0 | 2.00E-04 | 1 | 9.00E-04 | 0 | NA | NA |
| NM_005213    | <i>CSTA</i>       | 0.488414357110404 | 0 | 2.00E-04 | 1 | 9.00E-04 | 0 | NA | NA |
| NM_001199380 | <i>RNF145</i>     | 0.487960018173557 | 0 | 2.00E-04 | 1 | 9.00E-04 | 0 | NA | NA |
| NM_001199383 | <i>RNF145</i>     | 0.487960018173557 | 0 | 2.00E-04 | 1 | 9.00E-04 | 0 | NA | NA |
| NM_016039    | <i>C14orf166</i>  | 0.487051340299864 | 0 | 2.00E-04 | 1 | 9.00E-04 | 0 | NA | NA |
| NM_001005324 | <i>OR10V1</i>     | 0.486597001363017 | 0 | 2.00E-04 | 1 | 9.00E-04 | 0 | NA | NA |
| NM_001005480 | <i>OR2A2</i>      | 0.483416628805089 | 0 | 2.00E-04 | 1 | 9.00E-04 | 0 | NA | NA |
| NM_001282163 | <i>CLCN5</i>      | 0.483416628805089 | 0 | 2.00E-04 | 1 | 9.00E-04 | 0 | NA | NA |
| NM_001143820 | <i>ETS1</i>       | 0.482507950931395 | 0 | 2.00E-04 | 1 | 9.00E-04 | 0 | NA | NA |
| NM_001024661 | <i>PRAMEF13</i>   | 0.481599273057701 | 0 | 2.00E-04 | 1 | 9.00E-04 | 0 | NA | NA |
| NR_027245    | <i>LINC00305</i>  | 0.481144934120854 | 0 | 2.00E-04 | 1 | 9.00E-04 | 0 | NA | NA |
| NM_001008693 | <i>CST9</i>       | 0.481144934120854 | 0 | 2.00E-04 | 1 | 9.00E-04 | 0 | NA | NA |
| NM_001426    | <i>EN1</i>        | 0.480690595184007 | 0 | 2.00E-04 | 1 | 9.00E-04 | 0 | NA | NA |
| NM_015549    | <i>PLEKHG3</i>    | 0.48023625624716  | 0 | 2.00E-04 | 1 | 9.00E-04 | 0 | NA | NA |
| NM_001200001 | <i>NOTCH2</i>     | 0.479781917310313 | 0 | 2.00E-04 | 1 | 9.00E-04 | 0 | NA | NA |
| NM_024408    | <i>NOTCH2</i>     | 0.479781917310313 | 0 | 2.00E-04 | 1 | 9.00E-04 | 0 | NA | NA |
| NM_001001916 | <i>NOTCH2</i>     | 0.479781917310313 | 0 | 2.00E-04 | 1 | 9.00E-04 | 0 | NA | NA |
| NM_001001916 | <i>NOTCH2</i>     | 0.479781917310313 | 0 | 2.00E-04 | 1 | 9.00E-04 | 0 | NA | NA |
| NM_025221    | <i>KCNIP4</i>     | 0.477964561562926 | 0 | 2.00E-04 | 1 | 9.00E-04 | 0 | NA | NA |
| NR_024040    | <i>CSGALNACT1</i> | 0.477964561562926 | 0 | 2.00E-04 | 1 | 9.00E-04 | 0 | NA | NA |
| NM_014879    | <i>P2RY14</i>     | 0.477510222626079 | 0 | 2.00E-04 | 1 | 9.00E-04 | 0 | NA | NA |
| NM_003571    | <i>BFSP2</i>      | 0.477055883689232 | 0 | 2.00E-04 | 1 | 9.00E-04 | 0 | NA | NA |
| NM_015886    | <i>PI15</i>       | 0.477055883689232 | 0 | 2.00E-04 | 1 | 9.00E-04 | 0 | NA | NA |
| NM_006898    | <i>HOXD3</i>      | 0.476601544752385 | 0 | 2.00E-04 | 1 | 9.00E-04 | 0 | NA | NA |
| NM_012450    | <i>SLC13A4</i>    | 0.475692866878692 | 0 | 2.00E-04 | 1 | 9.00E-04 | 0 | NA | NA |
| NM_001258370 | <i>DIAPH3</i>     | 0.474329850068151 | 0 | 2.00E-04 | 1 | 9.00E-04 | 0 | NA | NA |
| NM_030932    | <i>DIAPH3</i>     | 0.474329850068151 | 0 | 2.00E-04 | 1 | 9.00E-04 | 0 | NA | NA |
| NM_001143988 | <i>NBPF6</i>      | 0.47296683325761  | 0 | 2.00E-04 | 1 | 9.00E-04 | 0 | NA | NA |
| NM_001143987 | <i>NBPF6</i>      | 0.47296683325761  | 0 | 2.00E-04 | 1 | 9.00E-04 | 0 | NA | NA |
| NM_001244710 | <i>GFPT1</i>      | 0.47296683325761  | 0 | 2.00E-04 | 1 | 9.00E-04 | 0 | NA | NA |
| NM_002056    | <i>GFPT1</i>      | 0.47296683325761  | 0 | 2.00E-04 | 1 | 9.00E-04 | 0 | NA | NA |
| NR_038321    | <i>OR51B5</i>     | 0.472058155383916 | 0 | 2.00E-04 | 1 | 9.00E-04 | 0 | NA | NA |
| NM_001005567 | <i>OR51B5</i>     | 0.472058155383916 | 0 | 2.00E-04 | 1 | 9.00E-04 | 0 | NA | NA |
| NM_001243429 | <i>ERG</i>        | 0.472058155383916 | 0 | 2.00E-04 | 1 | 9.00E-04 | 0 | NA | NA |
| NM_198514    | <i>NHLRC2</i>     | 0.47160381644707  | 0 | 2.00E-04 | 1 | 9.00E-04 | 0 | NA | NA |
| NM_002422    | <i>MMP3</i>       | 0.47160381644707  | 0 | 2.00E-04 | 1 | 9.00E-04 | 0 | NA | NA |
| NM_001099752 | <i>SYBU</i>       | 0.470695138573376 | 0 | 2.00E-04 | 1 | 9.00E-04 | 0 | NA | NA |
| NM_001099751 | <i>SYBU</i>       | 0.470695138573376 | 0 | 2.00E-04 | 1 | 9.00E-04 | 0 | NA | NA |
| NM_002372    | <i>MAN2A1</i>     | 0.470240799636529 | 0 | 2.00E-04 | 1 | 9.00E-04 | 0 | NA | NA |
| NM_001135995 | <i>ATXN3L</i>     | 0.470240799636529 | 0 | 2.00E-04 | 1 | 9.00E-04 | 0 | NA | NA |
| NM_012390    | <i>SMR3A</i>      | 0.468423443889141 | 0 | 2.00E-04 | 1 | 9.00E-04 | 0 | NA | NA |

|              |           |                   |                    |          |   |          |   |    |    |
|--------------|-----------|-------------------|--------------------|----------|---|----------|---|----|----|
| NM_175057    | TAAR9     | 0.468423443889141 | 0                  | 2.00E-04 | 1 | 9.00E-04 | 0 | NA | NA |
| NM_004615    | TSPAN7    | 0.467969104952294 | 0                  | 2.00E-04 | 1 | 9.00E-04 | 0 | NA | NA |
| NM_198992    | SYT10     | 0.467969104952294 | 0                  | 2.00E-04 | 1 | 9.00E-04 | 0 | NA | NA |
| NM_018976    | SLC38A2   | 0.467514766015448 | 0                  | 2.00E-04 | 1 | 9.00E-04 | 0 | NA | NA |
| NM_032263    | IQCG      | 0.467514766015448 | 0                  | 2.00E-04 | 1 | 9.00E-04 | 0 | NA | NA |
| NM_001105522 | TRIM49D2P | 0.466151749204907 | 0                  | 2.00E-04 | 1 | 9.00E-04 | 0 | NA | NA |
| NR_015374    | LOC401463 | 0.466151749204907 | 0                  | 2.00E-04 | 1 | 9.00E-04 | 0 | NA | NA |
| NM_004006    | DMD       | 0.466151749204907 | 0                  | 2.00E-04 | 1 | 9.00E-04 | 0 | NA | NA |
| NM_001004474 | OR10S1    | 0.462517037710132 | 0                  | 2.00E-04 | 1 | 9.00E-04 | 0 | NA | NA |
| NR_026806    | FLJ13224  | 0.462062698773285 | 0                  | 2.00E-04 | 1 | 9.00E-04 | 0 | NA | NA |
| NM_030650    | KIAA1715  | 0.461154020899591 | 0                  | 2.00E-04 | 1 | 9.00E-04 | 0 | NA | NA |
| NM_001005224 | OR4F3     | 0.460699681962744 | 0                  | 2.00E-04 | 1 | 9.00E-04 | 0 | NA | NA |
| NM_001005221 | OR4F29    | 0.460699681962744 | 0                  | 2.00E-04 | 1 | 9.00E-04 | 0 | NA | NA |
| NM_001005277 | OR4F16    | 0.460699681962744 | 0                  | 2.00E-04 | 1 | 9.00E-04 | 0 | NA | NA |
| NM_001135113 | IGFL2     | 0.459336665152204 | 0                  | 2.00E-04 | 1 | 9.00E-04 | 0 | NA | NA |
| NM_198541    | IGFL1     | 0.459336665152204 | 0                  | 2.00E-04 | 1 | 9.00E-04 | 0 | NA | NA |
| NM_198392    | TCF21     | 0.457064970467969 | 0                  | 2.00E-04 | 1 | 9.00E-04 | 0 | NA | NA |
| NM_003206    | TCF21     | 0.456610631531122 | 0                  | 2.00E-04 | 1 | 9.00E-04 | 0 | NA | NA |
| NM_181621    | KRTAP13-2 | 0.455247614720582 | 0                  | 2.00E-04 | 1 | 9.00E-04 | 0 | NA | NA |
| NM_001280558 | CPNE6     | 0.454793275783735 | 0                  | 2.00E-04 | 1 | 9.00E-04 | 0 | NA | NA |
| NM_004967    | IBSP      | 0.453884597910041 | 0                  | 2.00E-04 | 1 | 9.00E-04 | 0 | NA | NA |
| NM_001135940 | MYOT      | 0.4525215810995   | 0                  | 2.00E-04 | 1 | 9.00E-04 | 0 | NA | NA |
| NM_006790    | MYOT      | 0.4525215810995   | 0                  | 2.00E-04 | 1 | 9.00E-04 | 0 | NA | NA |
| NR_073596    | ATP8B4    | 0.452067242162653 | 0                  | 2.00E-04 | 1 | 9.00E-04 | 0 | NA | NA |
| NM_024837    | ATP8B4    | 0.452067242162653 | 0                  | 2.00E-04 | 1 | 9.00E-04 | 0 | NA | NA |
| NR_073597    | ATP8B4    | 0.452067242162653 | 0                  | 2.00E-04 | 1 | 9.00E-04 | 0 | NA | NA |
| NR_104136    | MANEA-AS1 | 0.451612903225806 | 0                  | 2.00E-04 | 1 | 9.00E-04 | 0 | NA | NA |
| NR_047502    | MANEA-AS1 | 0.451612903225806 | 0                  | 2.00E-04 | 1 | 9.00E-04 | 0 | NA | NA |
| NM_001271752 | MAGEB5    | 0.450704225352113 | 0                  | 2.00E-04 | 1 | 9.00E-04 | 0 | NA | NA |
| NM_001004702 | OR4C3     | 0.450249886415266 | 0                  | 2.00E-04 | 1 | 9.00E-04 | 0 | NA | NA |
| NM_003241    | TGM4      | 0.449795547478419 | 0                  | 2.00E-04 | 1 | 9.00E-04 | 0 | NA | NA |
| NR_023311    | ZNF137P   | 0.448886869604725 | 0                  | 2.00E-04 | 1 | 9.00E-04 | 0 | NA | NA |
| NM_001004457 | OR1N2     | 0.448886869604725 | 0                  | 2.00E-04 | 1 | 9.00E-04 | 0 | NA | NA |
| NR_028511    | TAAR3     | 0.447523852794184 | 0                  | 2.00E-04 | 1 | 9.00E-04 | 0 | NA | NA |
| NM_001172504 | SLC6A2    | 0.446160835983644 | 0                  | 2.00E-04 | 1 | 9.00E-04 | 0 | NA | NA |
| NM_006919    | SERPINB3  | 0.446160835983644 | 0                  | 2.00E-04 | 1 | 9.00E-04 | 0 | NA | NA |
| NM_030904    | OR2T1     | 0.44525215810995  | 0                  | 2.00E-04 | 1 | 9.00E-04 | 0 | NA | NA |
| NM_021013    | KRT34     | 0.444797819173103 | 0                  | 2.00E-04 | 1 | 9.00E-04 | 0 | NA | NA |
| NM_006242    | PPP1R3D   | 0.444343480236256 | 0                  | 2.00E-04 | 1 | 9.00E-04 | 0 | NA | NA |
| NM_001142541 | SLC35B3   | 0.491140390731486 | 0.0472512494320763 | 2.00E-04 | 1 | 9.00E-04 | 0 | NA | NA |
| NM_001142540 | SLC35B3   | 0.491140390731486 | 0.0472512494320763 | 2.00E-04 | 1 | 9.00E-04 | 0 | NA | NA |

|              |                  |                   |                    |          |   |          |   |    |    |
|--------------|------------------|-------------------|--------------------|----------|---|----------|---|----|----|
| NM_015948    | <i>SLC35B3</i>   | 0.491140390731486 | 0.0472512494320763 | 2.00E-04 | 1 | 9.00E-04 | 0 | NA | NA |
| NM_001042610 | <i>DBNDD1</i>    | 0.443889141299409 | 0                  | 2.00E-04 | 1 | 9.00E-04 | 0 | NA | NA |
| NM_005651    | <i>TDO2</i>      | 0.442980463425716 | 0                  | 2.00E-04 | 1 | 9.00E-04 | 0 | NA | NA |
| NM_002083    | <i>GPX2</i>      | 0.442980463425716 | 0                  | 2.00E-04 | 1 | 9.00E-04 | 0 | NA | NA |
| NR_046321    | <i>GPX2</i>      | 0.442980463425716 | 0                  | 2.00E-04 | 1 | 9.00E-04 | 0 | NA | NA |
| NR_046320    | <i>GPX2</i>      | 0.442980463425716 | 0                  | 2.00E-04 | 1 | 9.00E-04 | 0 | NA | NA |
| NM_000689    | <i>ALDH1A1</i>   | 0.442071785552022 | 0                  | 2.00E-04 | 1 | 9.00E-04 | 0 | NA | NA |
| NM_001005169 | <i>OR52I1</i>    | 0.441617446615175 | 0                  | 2.00E-04 | 1 | 9.00E-04 | 0 | NA | NA |
| NM_005390    | <i>PDHA2</i>     | 0.441617446615175 | 0                  | 2.00E-04 | 1 | 9.00E-04 | 0 | NA | NA |
| NM_001162951 | <i>SYTL2</i>     | 0.440708768741481 | 0                  | 2.00E-04 | 1 | 9.00E-04 | 0 | NA | NA |
| NM_001162953 | <i>SYTL2</i>     | 0.440708768741481 | 0                  | 2.00E-04 | 1 | 9.00E-04 | 0 | NA | NA |
| NM_001159694 | <i>EMCN</i>      | 0.440708768741481 | 0                  | 2.00E-04 | 1 | 9.00E-04 | 0 | NA | NA |
| NM_016242    | <i>EMCN</i>      | 0.440708768741481 | 0                  | 2.00E-04 | 1 | 9.00E-04 | 0 | NA | NA |
| NR_030164    | <i>MIR489</i>    | 0.440708768741481 | 0                  | 2.00E-04 | 1 | 9.00E-04 | 0 | NA | NA |
| NM_001270616 | <i>PROX1</i>     | 0.439800090867787 | 0                  | 2.00E-04 | 1 | 9.00E-04 | 0 | NA | NA |
| NM_001164507 | <i>NEB</i>       | 0.439800090867787 | 0                  | 2.00E-04 | 1 | 9.00E-04 | 0 | NA | NA |
| NM_001271208 | <i>NEB</i>       | 0.439800090867787 | 0                  | 2.00E-04 | 1 | 9.00E-04 | 0 | NA | NA |
| NM_001164508 | <i>NEB</i>       | 0.439800090867787 | 0                  | 2.00E-04 | 1 | 9.00E-04 | 0 | NA | NA |
| NM_004543    | <i>NEB</i>       | 0.439800090867787 | 0                  | 2.00E-04 | 1 | 9.00E-04 | 0 | NA | NA |
| NR_033942    | <i>ARHGEF34P</i> | 0.43934575193094  | 0                  | 2.00E-04 | 1 | 9.00E-04 | 0 | NA | NA |
| NM_006250    | <i>PRH1</i>      | 0.438891412994094 | 0                  | 2.00E-04 | 1 | 9.00E-04 | 0 | NA | NA |
| NM_015025    | <i>MYT1L</i>     | 0.438891412994094 | 0                  | 2.00E-04 | 1 | 9.00E-04 | 0 | NA | NA |
| NM_001004459 | <i>OR1S2</i>     | 0.4379827351204   | 0                  | 2.00E-04 | 1 | 9.00E-04 | 0 | NA | NA |
| NM_000586    | <i>IL2</i>       | 0.4379827351204   | 0                  | 2.00E-04 | 1 | 9.00E-04 | 0 | NA | NA |
| NM_018122    | <i>DARS2</i>     | 0.465243071331213 | 0.028169014084507  | 2.00E-04 | 1 | 9.00E-04 | 0 | NA | NA |
| NM_004063    | <i>CDH17</i>     | 0.437074057246706 | 0                  | 2.00E-04 | 1 | 9.00E-04 | 0 | NA | NA |
| NR_026591    | <i>RAD1</i>      | 0.436165379373012 | 0                  | 2.00E-04 | 1 | 9.00E-04 | 0 | NA | NA |
| NM_002853    | <i>RAD1</i>      | 0.436165379373012 | 0                  | 2.00E-04 | 1 | 9.00E-04 | 0 | NA | NA |
| NM_001001674 | <i>OR4F15</i>    | 0.435711040436165 | 0                  | 2.00E-04 | 1 | 9.00E-04 | 0 | NA | NA |
| NM_001170792 | <i>RMDN2</i>     | 0.435711040436165 | 0                  | 2.00E-04 | 1 | 9.00E-04 | 0 | NA | NA |
| NM_054104    | <i>OR6C3</i>     | 0.434802362562472 | 0                  | 2.00E-04 | 1 | 9.00E-04 | 0 | NA | NA |
| NM_001001413 | <i>GOLGA6L1</i>  | 0.434802362562472 | 0                  | 2.00E-04 | 1 | 9.00E-04 | 0 | NA | NA |
| NM_152291    | <i>MUC7</i>      | 0.433893684688778 | 0                  | 2.00E-04 | 1 | 9.00E-04 | 0 | NA | NA |
| NM_032933    | <i>TMEM241</i>   | 0.433893684688778 | 0                  | 2.00E-04 | 1 | 9.00E-04 | 0 | NA | NA |
| NM_005562    | <i>LAMC2</i>     | 0.433439345751931 | 0                  | 2.00E-04 | 1 | 9.00E-04 | 0 | NA | NA |
| NM_018891    | <i>LAMC2</i>     | 0.433439345751931 | 0                  | 2.00E-04 | 1 | 9.00E-04 | 0 | NA | NA |
| NM_020345    | <i>NKIRAS1</i>   | 0.433439345751931 | 0                  | 2.00E-04 | 1 | 9.00E-04 | 0 | NA | NA |
| NM_001198944 | <i>DTNA</i>      | 0.432530667878237 | 0                  | 2.00E-04 | 1 | 9.00E-04 | 0 | NA | NA |
| NM_001198942 | <i>DTNA</i>      | 0.432530667878237 | 0                  | 2.00E-04 | 1 | 9.00E-04 | 0 | NA | NA |
| NM_032980    | <i>DTNA</i>      | 0.432530667878237 | 0                  | 2.00E-04 | 1 | 9.00E-04 | 0 | NA | NA |
| NM_032981    | <i>DTNA</i>      | 0.432530667878237 | 0                  | 2.00E-04 | 1 | 9.00E-04 | 0 | NA | NA |

|              |                 |                   |                    |          |   |          |   |    |    |
|--------------|-----------------|-------------------|--------------------|----------|---|----------|---|----|----|
| NM_001170553 | <i>VSIG1</i>    | 0.447523852794184 | 0.0159018627896411 | 2.00E-04 | 1 | 9.00E-04 | 0 | NA | NA |
| NM_182607    | <i>VSIG1</i>    | 0.447523852794184 | 0.0159018627896411 | 2.00E-04 | 1 | 9.00E-04 | 0 | NA | NA |
| NM_001253846 | <i>GMDS</i>     | 0.431167651067697 | 0                  | 2.00E-04 | 1 | 9.00E-04 | 0 | NA | NA |
| NM_007035    | <i>KERA</i>     | 0.429350295320309 | 0                  | 2.00E-04 | 1 | 9.00E-04 | 0 | NA | NA |
| NM_015548    | <i>DST</i>      | 0.428895956383462 | 0                  | 2.00E-04 | 1 | 9.00E-04 | 0 | NA | NA |
| NM_001723    | <i>DST</i>      | 0.428895956383462 | 0                  | 2.00E-04 | 1 | 9.00E-04 | 0 | NA | NA |
| NM_206933    | <i>USH2A</i>    | 0.427987278509768 | 0                  | 2.00E-04 | 1 | 9.00E-04 | 0 | NA | NA |
| NM_007123    | <i>USH2A</i>    | 0.427987278509768 | 0                  | 2.00E-04 | 1 | 9.00E-04 | 0 | NA | NA |
| NM_001256080 | <i>KLK2</i>     | 0.427532939572921 | 0                  | 2.00E-04 | 1 | 9.00E-04 | 0 | NA | NA |
| NM_005551    | <i>KLK2</i>     | 0.427532939572921 | 0                  | 2.00E-04 | 1 | 9.00E-04 | 0 | NA | NA |
| NR_045763    | <i>KLK2</i>     | 0.427532939572921 | 0                  | 2.00E-04 | 1 | 9.00E-04 | 0 | NA | NA |
| NR_045762    | <i>KLK2</i>     | 0.427532939572921 | 0                  | 2.00E-04 | 1 | 9.00E-04 | 0 | NA | NA |
| NM_001002231 | <i>KLK2</i>     | 0.427532939572921 | 0                  | 2.00E-04 | 1 | 9.00E-04 | 0 | NA | NA |
| NM_001007242 | <i>GP2</i>      | 0.427078600636075 | 0                  | 2.00E-04 | 1 | 9.00E-04 | 0 | NA | NA |
| NM_001502    | <i>GP2</i>      | 0.427078600636075 | 0                  | 2.00E-04 | 1 | 9.00E-04 | 0 | NA | NA |
| NM_001007241 | <i>GP2</i>      | 0.427078600636075 | 0                  | 2.00E-04 | 1 | 9.00E-04 | 0 | NA | NA |
| NM_001007240 | <i>GP2</i>      | 0.427078600636075 | 0                  | 2.00E-04 | 1 | 9.00E-04 | 0 | NA | NA |
| NM_004781    | <i>VAMP3</i>    | 0.426624261699228 | 0                  | 2.00E-04 | 1 | 9.00E-04 | 0 | NA | NA |
| NM_001145155 | <i>NR2F2</i>    | 0.425261244888687 | 0                  | 2.00E-04 | 1 | 9.00E-04 | 0 | NA | NA |
| NM_001172626 | <i>AMPD1</i>    | 0.42480690595184  | 0                  | 2.00E-04 | 1 | 9.00E-04 | 0 | NA | NA |
| NM_000036    | <i>AMPD1</i>    | 0.42480690595184  | 0                  | 2.00E-04 | 1 | 9.00E-04 | 0 | NA | NA |
| NM_004570    | <i>PIK3C2G</i>  | 0.423898228078146 | 0                  | 2.00E-04 | 1 | 9.00E-04 | 0 | NA | NA |
| NR_002309    | <i>RPS26P11</i> | 0.423898228078146 | 0                  | 2.00E-04 | 1 | 9.00E-04 | 0 | NA | NA |
| NM_018932    | <i>PCDHB12</i>  | 0.422989550204453 | 0                  | 2.00E-04 | 1 | 9.00E-04 | 0 | NA | NA |
| NM_001278253 | <i>PIP5K1B</i>  | 0.422080872330759 | 0                  | 2.00E-04 | 1 | 9.00E-04 | 0 | NA | NA |
| NM_003558    | <i>PIP5K1B</i>  | 0.422080872330759 | 0                  | 2.00E-04 | 1 | 9.00E-04 | 0 | NA | NA |
| NM_001257160 | <i>CEP41</i>    | 0.422080872330759 | 0                  | 2.00E-04 | 1 | 9.00E-04 | 0 | NA | NA |
| NM_001257159 | <i>CEP41</i>    | 0.422080872330759 | 0                  | 2.00E-04 | 1 | 9.00E-04 | 0 | NA | NA |
| NM_001257158 | <i>CEP41</i>    | 0.422080872330759 | 0                  | 2.00E-04 | 1 | 9.00E-04 | 0 | NA | NA |
| NR_046443    | <i>CEP41</i>    | 0.422080872330759 | 0                  | 2.00E-04 | 1 | 9.00E-04 | 0 | NA | NA |
| NM_018718    | <i>CEP41</i>    | 0.422080872330759 | 0                  | 2.00E-04 | 1 | 9.00E-04 | 0 | NA | NA |
| NM_021255    | <i>PELI2</i>    | 0.421172194457065 | 0                  | 2.00E-04 | 1 | 9.00E-04 | 0 | NA | NA |
| NM_001001827 | <i>OR2T35</i>   | 0.421172194457065 | 0                  | 2.00E-04 | 1 | 9.00E-04 | 0 | NA | NA |
| NR_002323    | <i>TUG1</i>     | 0.420717855520218 | 0                  | 2.00E-04 | 1 | 9.00E-04 | 0 | NA | NA |
| NM_002548    | <i>OR1D2</i>    | 0.420263516583371 | 0                  | 2.00E-04 | 1 | 9.00E-04 | 0 | NA | NA |
| NM_181504    | <i>PIK3R1</i>   | 0.537482962289868 | 0.117673784643344  | 2.00E-04 | 1 | 9.00E-04 | 0 | NA | NA |
| NM_052971    | <i>LEAP2</i>    | 0.419809177646524 | 0                  | 2.00E-04 | 1 | 9.00E-04 | 0 | NA | NA |
| NM_022053    | <i>NXF2</i>     | 0.419809177646524 | 0                  | 2.00E-04 | 1 | 9.00E-04 | 0 | NA | NA |
| NM_001257168 | <i>ELK1</i>     | 0.419809177646524 | 0                  | 2.00E-04 | 1 | 9.00E-04 | 0 | NA | NA |
| NM_005229    | <i>ELK1</i>     | 0.419809177646524 | 0                  | 2.00E-04 | 1 | 9.00E-04 | 0 | NA | NA |
| NM_001114123 | <i>ELK1</i>     | 0.419809177646524 | 0                  | 2.00E-04 | 1 | 9.00E-04 | 0 | NA | NA |

|              |            |                   |                    |          |   |          |   |    |    |
|--------------|------------|-------------------|--------------------|----------|---|----------|---|----|----|
| NM_006748    | SLA        | 0.416174466151749 | 0                  | 2.00E-04 | 1 | 9.00E-04 | 0 | NA | NA |
| NM_001242871 | SLAIN1     | 0.414357110404362 | 0                  | 2.00E-04 | 1 | 9.00E-04 | 0 | NA | NA |
| NM_001242870 | SLAIN1     | 0.414357110404362 | 0                  | 2.00E-04 | 1 | 9.00E-04 | 0 | NA | NA |
| NM_001242869 | SLAIN1     | 0.414357110404362 | 0                  | 2.00E-04 | 1 | 9.00E-04 | 0 | NA | NA |
| NM_144595    | SLAIN1     | 0.414357110404362 | 0                  | 2.00E-04 | 1 | 9.00E-04 | 0 | NA | NA |
| NM_001004458 | OR1S1      | 0.481144934120854 | 0.0667878237164925 | 2.00E-04 | 1 | 9.00E-04 | 0 | NA | NA |
| NR_026543    | C21orf88   | 0.413448432530668 | 0                  | 2.00E-04 | 1 | 9.00E-04 | 0 | NA | NA |
| NR_026542    | C21orf88   | 0.413448432530668 | 0                  | 2.00E-04 | 1 | 9.00E-04 | 0 | NA | NA |
| NM_024540    | MRPL24     | 0.412539754656974 | 0                  | 2.00E-04 | 1 | 9.00E-04 | 0 | NA | NA |
| NM_145729    | MRPL24     | 0.412539754656974 | 0                  | 2.00E-04 | 1 | 9.00E-04 | 0 | NA | NA |
| NM_198682    | GYPE       | 0.412539754656974 | 0                  | 2.00E-04 | 1 | 9.00E-04 | 0 | NA | NA |
| NM_002102    | GYPE       | 0.412539754656974 | 0                  | 2.00E-04 | 1 | 9.00E-04 | 0 | NA | NA |
| NM_015351    | TTC9       | 0.41163107678328  | 0                  | 2.00E-04 | 1 | 9.00E-04 | 0 | NA | NA |
| NM_001197220 | PDE4D      | 0.41163107678328  | 0                  | 2.00E-04 | 1 | 9.00E-04 | 0 | NA | NA |
| NM_133484    | TANK       | 0.411176737846433 | 0                  | 2.00E-04 | 1 | 9.00E-04 | 0 | NA | NA |
| NM_004180    | TANK       | 0.411176737846433 | 0                  | 2.00E-04 | 1 | 9.00E-04 | 0 | NA | NA |
| NR_026663    | GLIS3-AS1  | 0.411176737846433 | 0                  | 2.00E-04 | 1 | 9.00E-04 | 0 | NA | NA |
| NR_045127    | RAET1E-AS1 | 0.408905043162199 | 0                  | 2.00E-04 | 1 | 9.00E-04 | 0 | NA | NA |
| NM_001004136 | OR2T2      | 0.408450704225352 | 0                  | 2.00E-04 | 1 | 9.00E-04 | 0 | NA | NA |
| NM_181429    | TAS2R42    | 0.407996365288505 | 0                  | 2.00E-04 | 1 | 9.00E-04 | 0 | NA | NA |
| NM_001284338 | NEDD4      | 0.407087687414811 | 0                  | 2.00E-04 | 1 | 9.00E-04 | 0 | NA | NA |
| NM_001284340 | NEDD4      | 0.407087687414811 | 0                  | 2.00E-04 | 1 | 9.00E-04 | 0 | NA | NA |
| NM_198400    | NEDD4      | 0.407087687414811 | 0                  | 2.00E-04 | 1 | 9.00E-04 | 0 | NA | NA |
| NR_104302    | NEDD4      | 0.407087687414811 | 0                  | 2.00E-04 | 1 | 9.00E-04 | 0 | NA | NA |
| NM_001284339 | NEDD4      | 0.407087687414811 | 0                  | 2.00E-04 | 1 | 9.00E-04 | 0 | NA | NA |
| NR_030289    | MIR563     | 0.406633348477965 | 0                  | 2.00E-04 | 1 | 9.00E-04 | 0 | NA | NA |
| NM_145910    | NEK11      | 0.406179009541118 | 0                  | 2.00E-04 | 1 | 9.00E-04 | 0 | NA | NA |
| NM_001146003 | NEK11      | 0.406179009541118 | 0                  | 2.00E-04 | 1 | 9.00E-04 | 0 | NA | NA |
| NM_024800    | NEK11      | 0.406179009541118 | 0                  | 2.00E-04 | 1 | 9.00E-04 | 0 | NA | NA |
| NR_027038    | MBNL1-AS1  | 0.405270331667424 | 0                  | 2.00E-04 | 1 | 9.00E-04 | 0 | NA | NA |
| NR_027037    | MBNL1-AS1  | 0.405270331667424 | 0                  | 2.00E-04 | 1 | 9.00E-04 | 0 | NA | NA |
| NM_001163334 | SYTL5      | 0.404815992730577 | 0                  | 2.00E-04 | 1 | 9.00E-04 | 0 | NA | NA |
| NM_001001966 | OR14A16    | 0.404815992730577 | 0                  | 2.00E-04 | 1 | 9.00E-04 | 0 | NA | NA |
| NM_033061    | KRTAP4-7   | 0.40436165379373  | 0                  | 2.00E-04 | 1 | 9.00E-04 | 0 | NA | NA |
| NM_173355    | UPP2       | 0.40436165379373  | 0                  | 2.00E-04 | 1 | 9.00E-04 | 0 | NA | NA |
| NM_144718    | SPICE1     | 0.40436165379373  | 0                  | 2.00E-04 | 1 | 9.00E-04 | 0 | NA | NA |
| NR_047518    | HOTAIR     | 0.403907314856883 | 0                  | 2.00E-04 | 1 | 9.00E-04 | 0 | NA | NA |
| NM_002086    | GRB2       | 0.403907314856883 | 0                  | 2.00E-04 | 1 | 9.00E-04 | 0 | NA | NA |
| NM_203506    | GRB2       | 0.403907314856883 | 0                  | 2.00E-04 | 1 | 9.00E-04 | 0 | NA | NA |
| NM_019617    | GKN1       | 0.403452975920036 | 0                  | 2.00E-04 | 1 | 9.00E-04 | 0 | NA | NA |
| NM_006408    | AGR2       | 0.402089959109496 | 0                  | 2.00E-04 | 1 | 9.00E-04 | 0 | NA | NA |

|              |                 |                   |   |          |   |          |   |    |    |
|--------------|-----------------|-------------------|---|----------|---|----------|---|----|----|
| NM_006911    | <i>RLN1</i>     | 0.401635620172649 | 0 | 2.00E-04 | 1 | 9.00E-04 | 0 | NA | NA |
| NM_001197287 | <i>OR11H2</i>   | 0.401181281235802 | 0 | 2.00E-04 | 1 | 9.00E-04 | 0 | NA | NA |
| NM_001142417 | <i>CRISP2</i>   | 0.400726942298955 | 0 | 2.00E-04 | 1 | 9.00E-04 | 0 | NA | NA |
| NM_001142408 | <i>CRISP2</i>   | 0.400726942298955 | 0 | 2.00E-04 | 1 | 9.00E-04 | 0 | NA | NA |
| NM_001142407 | <i>CRISP2</i>   | 0.400726942298955 | 0 | 2.00E-04 | 1 | 9.00E-04 | 0 | NA | NA |
| NM_003296    | <i>CRISP2</i>   | 0.400726942298955 | 0 | 2.00E-04 | 1 | 9.00E-04 | 0 | NA | NA |
| NM_001261822 | <i>CRISP2</i>   | 0.400726942298955 | 0 | 2.00E-04 | 1 | 9.00E-04 | 0 | NA | NA |
| NM_001142435 | <i>CRISP2</i>   | 0.400726942298955 | 0 | 2.00E-04 | 1 | 9.00E-04 | 0 | NA | NA |
| NM_138574    | <i>HDGFL1</i>   | 0.400272603362108 | 0 | 2.00E-04 | 1 | 9.00E-04 | 0 | NA | NA |
| NM_001040703 | <i>DEFB105B</i> | 0.399818264425261 | 0 | 2.00E-04 | 1 | 9.00E-04 | 0 | NA | NA |
| NM_152250    | <i>DEFB105A</i> | 0.399818264425261 | 0 | 2.00E-04 | 1 | 9.00E-04 | 0 | NA | NA |
| NM_001711    | <i>BGN</i>      | 0.399818264425261 | 0 | 2.00E-04 | 1 | 9.00E-04 | 0 | NA | NA |
| NM_004657    | <i>SDPR</i>     | 0.399363925488414 | 0 | 2.00E-04 | 1 | 9.00E-04 | 0 | NA | NA |
| NM_003826    | <i>NAPG</i>     | 0.398455247614721 | 0 | 2.00E-04 | 1 | 9.00E-04 | 0 | NA | NA |
| NM_001122757 | <i>POU1F1</i>   | 0.398000908677874 | 0 | 2.00E-04 | 1 | 9.00E-04 | 0 | NA | NA |
| NM_000306    | <i>POU1F1</i>   | 0.398000908677874 | 0 | 2.00E-04 | 1 | 9.00E-04 | 0 | NA | NA |
| NM_001001875 | <i>TPD52L3</i>  | 0.397546569741027 | 0 | 2.00E-04 | 1 | 9.00E-04 | 0 | NA | NA |
| NM_001001874 | <i>TPD52L3</i>  | 0.397546569741027 | 0 | 2.00E-04 | 1 | 9.00E-04 | 0 | NA | NA |
| NM_033516    | <i>TPD52L3</i>  | 0.397546569741027 | 0 | 2.00E-04 | 1 | 9.00E-04 | 0 | NA | NA |
| NM_001131066 | <i>RFESD</i>    | 0.396637891867333 | 0 | 2.00E-04 | 1 | 9.00E-04 | 0 | NA | NA |
| NM_001144966 | <i>NEDD4L</i>   | 0.395729213993639 | 0 | 2.00E-04 | 1 | 9.00E-04 | 0 | NA | NA |
| NM_053039    | <i>UGT2B28</i>  | 0.394820536119945 | 0 | 2.00E-04 | 1 | 9.00E-04 | 0 | NA | NA |
| NM_001207004 | <i>UGT2B28</i>  | 0.394820536119945 | 0 | 2.00E-04 | 1 | 9.00E-04 | 0 | NA | NA |
| NM_006567    | <i>FARS2</i>    | 0.394820536119945 | 0 | 2.00E-04 | 1 | 9.00E-04 | 0 | NA | NA |
| NM_176885    | <i>TAS2R31</i>  | 0.394366197183099 | 0 | 2.00E-04 | 1 | 9.00E-04 | 0 | NA | NA |
| NM_134260    | <i>RORA</i>     | 0.394366197183099 | 0 | 2.00E-04 | 1 | 9.00E-04 | 0 | NA | NA |
| NM_002943    | <i>RORA</i>     | 0.394366197183099 | 0 | 2.00E-04 | 1 | 9.00E-04 | 0 | NA | NA |
| NM_001205259 | <i>TP53TG3C</i> | 0.393457519309405 | 0 | 2.00E-04 | 1 | 9.00E-04 | 0 | NA | NA |
| NM_001205260 | <i>TP53TG3C</i> | 0.393457519309405 | 0 | 2.00E-04 | 1 | 9.00E-04 | 0 | NA | NA |
| NM_001099687 | <i>TP53TG3B</i> | 0.393457519309405 | 0 | 2.00E-04 | 1 | 9.00E-04 | 0 | NA | NA |
| NM_016212    | <i>TP53TG3</i>  | 0.393457519309405 | 0 | 2.00E-04 | 1 | 9.00E-04 | 0 | NA | NA |
| NM_001205265 | <i>TP53TG3B</i> | 0.393457519309405 | 0 | 2.00E-04 | 1 | 9.00E-04 | 0 | NA | NA |
| NM_001267813 | <i>TP53TG3</i>  | 0.393457519309405 | 0 | 2.00E-04 | 1 | 9.00E-04 | 0 | NA | NA |
| NM_171829    | <i>KCNMB3</i>   | 0.393457519309405 | 0 | 2.00E-04 | 1 | 9.00E-04 | 0 | NA | NA |
| NR_028135    | <i>KCNMB3</i>   | 0.393457519309405 | 0 | 2.00E-04 | 1 | 9.00E-04 | 0 | NA | NA |
| NM_003309    | <i>TSPYL1</i>   | 0.393457519309405 | 0 | 2.00E-04 | 1 | 9.00E-04 | 0 | NA | NA |
| NM_000074    | <i>CD40LG</i>   | 0.392548841435711 | 0 | 2.00E-04 | 1 | 9.00E-04 | 0 | NA | NA |
| NM_178007    | <i>STARD13</i>  | 0.392548841435711 | 0 | 2.00E-04 | 1 | 9.00E-04 | 0 | NA | NA |
| NM_001243466 | <i>STARD13</i>  | 0.392548841435711 | 0 | 2.00E-04 | 1 | 9.00E-04 | 0 | NA | NA |
| NM_139202    | <i>MLC1</i>     | 0.392548841435711 | 0 | 2.00E-04 | 1 | 9.00E-04 | 0 | NA | NA |
| NM_001005213 | <i>OR9G1</i>    | 0.392094502498864 | 0 | 2.00E-04 | 1 | 9.00E-04 | 0 | NA | NA |

|              |          |                   |                    |          |   |          |   |    |    |
|--------------|----------|-------------------|--------------------|----------|---|----------|---|----|----|
| NM_001013358 | OR9G9    | 0.392094502498864 | 0                  | 2.00E-04 | 1 | 9.00E-04 | 0 | NA | NA |
| NM_012353    | OR1C1    | 0.392094502498864 | 0                  | 2.00E-04 | 1 | 9.00E-04 | 0 | NA | NA |
| NM_001145671 | SORBS2   | 0.472512494320763 | 0.080872330758746  | 2.00E-04 | 1 | 9.00E-04 | 0 | NA | NA |
| NM_032041    | NCALD    | 0.39118582462517  | 0                  | 2.00E-04 | 1 | 9.00E-04 | 0 | NA | NA |
| NM_001282551 | BTBD3    | 0.473421172194457 | 0.0826896865061336 | 2.00E-04 | 1 | 9.00E-04 | 0 | NA | NA |
| NM_001282554 | BTBD3    | 0.473421172194457 | 0.0826896865061336 | 2.00E-04 | 1 | 9.00E-04 | 0 | NA | NA |
| NM_014962    | BTBD3    | 0.473421172194457 | 0.0826896865061336 | 2.00E-04 | 1 | 9.00E-04 | 0 | NA | NA |
| NR_002925    | FMO9P    | 0.390731485688323 | 0                  | 2.00E-04 | 1 | 9.00E-04 | 0 | NA | NA |
| NM_024659    | GTDC1    | 0.390731485688323 | 0                  | 2.00E-04 | 1 | 9.00E-04 | 0 | NA | NA |
| NM_000522    | HOXA13   | 0.390731485688323 | 0                  | 2.00E-04 | 1 | 9.00E-04 | 0 | NA | NA |
| NR_002940    | LRR37A4P | 0.390277146751477 | 0                  | 2.00E-04 | 1 | 9.00E-04 | 0 | NA | NA |
| NM_181872    | DMRT2    | 0.389368468877783 | 0                  | 2.00E-04 | 1 | 9.00E-04 | 0 | NA | NA |
| NM_198827    | GPR133   | 0.388914129940936 | 0                  | 2.00E-04 | 1 | 9.00E-04 | 0 | NA | NA |
| NM_052947    | ALPK2    | 0.388914129940936 | 0                  | 2.00E-04 | 1 | 9.00E-04 | 0 | NA | NA |
| NM_002427    | MMP13    | 0.388459791004089 | 0                  | 2.00E-04 | 1 | 9.00E-04 | 0 | NA | NA |
| NR_027153    | RPL21P44 | 0.388459791004089 | 0                  | 2.00E-04 | 1 | 9.00E-04 | 0 | NA | NA |
| NM_182836    | RABGGTA  | 0.388005452067242 | 0                  | 2.00E-04 | 1 | 9.00E-04 | 0 | NA | NA |
| NM_004581    | RABGGTA  | 0.388005452067242 | 0                  | 2.00E-04 | 1 | 9.00E-04 | 0 | NA | NA |
| NM_020864    | NYAP2    | 0.387551113130395 | 0                  | 2.00E-04 | 1 | 9.00E-04 | 0 | NA | NA |
| NM_001160174 | NAT1     | 0.387551113130395 | 0                  | 2.00E-04 | 1 | 9.00E-04 | 0 | NA | NA |
| NM_012475    | USP21    | 0.387096774193548 | 0                  | 2.00E-04 | 1 | 9.00E-04 | 0 | NA | NA |
| NM_001014443 | USP21    | 0.387096774193548 | 0                  | 2.00E-04 | 1 | 9.00E-04 | 0 | NA | NA |
| NM_006204    | PDE6C    | 0.387096774193548 | 0                  | 2.00E-04 | 1 | 9.00E-04 | 0 | NA | NA |
| NM_001257967 | CCDC129  | 0.387096774193548 | 0                  | 2.00E-04 | 1 | 9.00E-04 | 0 | NA | NA |
| NM_001821    | CHML     | 0.385733757383008 | 0                  | 2.00E-04 | 1 | 9.00E-04 | 0 | NA | NA |
| NR_046113    | FLJ16171 | 0.385279418446161 | 0                  | 2.00E-04 | 1 | 9.00E-04 | 0 | NA | NA |
| NM_001008397 | GPX8     | 0.499772830531577 | 0.114947751022263  | 2.00E-04 | 1 | 9.00E-04 | 0 | NA | NA |
| NM_005669    | REEP5    | 0.384825079509314 | 0                  | 2.00E-04 | 1 | 9.00E-04 | 0 | NA | NA |
| NM_002175    | IFNA21   | 0.384825079509314 | 0                  | 2.00E-04 | 1 | 9.00E-04 | 0 | NA | NA |
| NM_000288    | PEX7     | 0.384370740572467 | 0                  | 2.00E-04 | 1 | 9.00E-04 | 0 | NA | NA |
| NM_001257998 | CCDC132  | 0.384370740572467 | 0                  | 2.00E-04 | 1 | 9.00E-04 | 0 | NA | NA |
| NM_017667    | CCDC132  | 0.384370740572467 | 0                  | 2.00E-04 | 1 | 9.00E-04 | 0 | NA | NA |
| NM_024553    | CCDC132  | 0.384370740572467 | 0                  | 2.00E-04 | 1 | 9.00E-04 | 0 | NA | NA |
| NM_012130    | CLDN14   | 0.384370740572467 | 0                  | 2.00E-04 | 1 | 9.00E-04 | 0 | NA | NA |
| NM_001256576 | ENC1     | 0.384370740572467 | 0                  | 2.00E-04 | 1 | 9.00E-04 | 0 | NA | NA |
| NM_001256575 | ENC1     | 0.384370740572467 | 0                  | 2.00E-04 | 1 | 9.00E-04 | 0 | NA | NA |
| NM_001256574 | ENC1     | 0.384370740572467 | 0                  | 2.00E-04 | 1 | 9.00E-04 | 0 | NA | NA |
| NR_046318    | ENC1     | 0.384370740572467 | 0                  | 2.00E-04 | 1 | 9.00E-04 | 0 | NA | NA |
| NM_003633    | ENC1     | 0.384370740572467 | 0                  | 2.00E-04 | 1 | 9.00E-04 | 0 | NA | NA |
| NM_001184749 | SLITRK4  | 0.512494320763289 | 0.128123580190822  | 2.00E-04 | 1 | 9.00E-04 | 0 | NA | NA |
| NM_001276503 | SDHD     | 0.38391640163562  | 0                  | 2.00E-04 | 1 | 9.00E-04 | 0 | NA | NA |

|              |          |                   |                    |          |   |          |   |    |    |
|--------------|----------|-------------------|--------------------|----------|---|----------|---|----|----|
| NM_001276506 | SDHD     | 0.38391640163562  | 0                  | 2.00E-04 | 1 | 9.00E-04 | 0 | NA | NA |
| NM_003002    | SDHD     | 0.38391640163562  | 0                  | 2.00E-04 | 1 | 9.00E-04 | 0 | NA | NA |
| NM_001276504 | SDHD     | 0.38391640163562  | 0                  | 2.00E-04 | 1 | 9.00E-04 | 0 | NA | NA |
| NR_077060    | SDHD     | 0.38391640163562  | 0                  | 2.00E-04 | 1 | 9.00E-04 | 0 | NA | NA |
| NM_145234    | CHRD1    | 0.38391640163562  | 0                  | 2.00E-04 | 1 | 9.00E-04 | 0 | NA | NA |
| NM_001143983 | CHRD1    | 0.38391640163562  | 0                  | 2.00E-04 | 1 | 9.00E-04 | 0 | NA | NA |
| NM_001143982 | CHRD1    | 0.38391640163562  | 0                  | 2.00E-04 | 1 | 9.00E-04 | 0 | NA | NA |
| NM_001143981 | CHRD1    | 0.38391640163562  | 0                  | 2.00E-04 | 1 | 9.00E-04 | 0 | NA | NA |
| NM_001031679 | MSRB3    | 0.383462062698773 | 0                  | 2.00E-04 | 1 | 9.00E-04 | 0 | NA | NA |
| NM_001193461 | MSRB3    | 0.383462062698773 | 0                  | 2.00E-04 | 1 | 9.00E-04 | 0 | NA | NA |
| NM_001193460 | MSRB3    | 0.383462062698773 | 0                  | 2.00E-04 | 1 | 9.00E-04 | 0 | NA | NA |
| NM_198080    | MSRB3    | 0.383462062698773 | 0                  | 2.00E-04 | 1 | 9.00E-04 | 0 | NA | NA |
| NM_001102450 | RGS8     | 0.383462062698773 | 0                  | 2.00E-04 | 1 | 9.00E-04 | 0 | NA | NA |
| NM_033345    | RGS8     | 0.383462062698773 | 0                  | 2.00E-04 | 1 | 9.00E-04 | 0 | NA | NA |
| NM_181077    | GOLGA8A  | 0.383462062698773 | 0                  | 2.00E-04 | 1 | 9.00E-04 | 0 | NA | NA |
| NM_001031809 | MS4A3    | 0.383007723761926 | 0                  | 2.00E-04 | 1 | 9.00E-04 | 0 | NA | NA |
| NM_006138    | MS4A3    | 0.383007723761926 | 0                  | 2.00E-04 | 1 | 9.00E-04 | 0 | NA | NA |
| NM_001031666 | MS4A3    | 0.383007723761926 | 0                  | 2.00E-04 | 1 | 9.00E-04 | 0 | NA | NA |
| NM_001114937 | SH2D1A   | 0.383007723761926 | 0                  | 2.00E-04 | 1 | 9.00E-04 | 0 | NA | NA |
| NM_002351    | SH2D1A   | 0.383007723761926 | 0                  | 2.00E-04 | 1 | 9.00E-04 | 0 | NA | NA |
| NM_007281    | SCRG1    | 0.383007723761926 | 0                  | 2.00E-04 | 1 | 9.00E-04 | 0 | NA | NA |
| NM_001002035 | DEFB108B | 0.38255338482508  | 0                  | 2.00E-04 | 1 | 9.00E-04 | 0 | NA | NA |
| NM_006359    | SLC9A6   | 0.382099045888233 | 0                  | 2.00E-04 | 1 | 9.00E-04 | 0 | NA | NA |
| NM_001177651 | SLC9A6   | 0.382099045888233 | 0                  | 2.00E-04 | 1 | 9.00E-04 | 0 | NA | NA |
| NM_001042537 | SLC9A6   | 0.382099045888233 | 0                  | 2.00E-04 | 1 | 9.00E-04 | 0 | NA | NA |
| NM_133503    | DCN      | 0.382099045888233 | 0                  | 2.00E-04 | 1 | 9.00E-04 | 0 | NA | NA |
| NR_003267    | GGT3P    | 0.382099045888233 | 0                  | 2.00E-04 | 1 | 9.00E-04 | 0 | NA | NA |
| NM_017409    | HOXC10   | 0.453430258973194 | 0.0713312130849614 | 2.00E-04 | 1 | 9.00E-04 | 0 | NA | NA |
| NM_001005240 | OR4F17   | 0.381644706951386 | 0                  | 2.00E-04 | 1 | 9.00E-04 | 0 | NA | NA |
| NM_004727    | SLC24A1  | 0.381190368014539 | 0                  | 2.00E-04 | 1 | 9.00E-04 | 0 | NA | NA |
| NM_145174    | DNAJB7   | 0.381190368014539 | 0                  | 2.00E-04 | 1 | 9.00E-04 | 0 | NA | NA |
| NM_001004454 | OR1L8    | 0.381190368014539 | 0                  | 2.00E-04 | 1 | 9.00E-04 | 0 | NA | NA |
| NM_006040    | HS3ST4   | 0.380281690140845 | 0                  | 2.00E-04 | 1 | 9.00E-04 | 0 | NA | NA |
| NM_144949    | SOCS5    | 0.380281690140845 | 0                  | 2.00E-04 | 1 | 9.00E-04 | 0 | NA | NA |
| NM_001145007 | MUC7     | 0.379373012267151 | 0                  | 2.00E-04 | 1 | 9.00E-04 | 0 | NA | NA |
| NM_001012732 | DCTD     | 0.379373012267151 | 0                  | 2.00E-04 | 1 | 9.00E-04 | 0 | NA | NA |
| NM_001921    | DCTD     | 0.379373012267151 | 0                  | 2.00E-04 | 1 | 9.00E-04 | 0 | NA | NA |
| NM_001160004 | NRG1     | 0.378918673330304 | 0                  | 2.00E-04 | 1 | 9.00E-04 | 0 | NA | NA |
| NM_001160002 | NRG1     | 0.378918673330304 | 0                  | 2.00E-04 | 1 | 9.00E-04 | 0 | NA | NA |
| NM_001160008 | NRG1     | 0.378918673330304 | 0                  | 2.00E-04 | 1 | 9.00E-04 | 0 | NA | NA |
| NM_013956    | NRG1     | 0.378918673330304 | 0                  | 2.00E-04 | 1 | 9.00E-04 | 0 | NA | NA |



|              |             |                   |                    |          |   |          |   |    |    |
|--------------|-------------|-------------------|--------------------|----------|---|----------|---|----|----|
| NM_001160007 | NRG1        | 0.378918673330304 | 0                  | 2.00E-04 | 1 | 9.00E-04 | 0 | NA | NA |
| NM_001160005 | NRG1        | 0.378918673330304 | 0                  | 2.00E-04 | 1 | 9.00E-04 | 0 | NA | NA |
| NM_013964    | NRG1        | 0.378918673330304 | 0                  | 2.00E-04 | 1 | 9.00E-04 | 0 | NA | NA |
| NM_004495    | NRG1        | 0.378918673330304 | 0                  | 2.00E-04 | 1 | 9.00E-04 | 0 | NA | NA |
| NM_013960    | NRG1        | 0.378918673330304 | 0                  | 2.00E-04 | 1 | 9.00E-04 | 0 | NA | NA |
| NM_013958    | NRG1        | 0.378918673330304 | 0                  | 2.00E-04 | 1 | 9.00E-04 | 0 | NA | NA |
| NM_013957    | NRG1        | 0.378918673330304 | 0                  | 2.00E-04 | 1 | 9.00E-04 | 0 | NA | NA |
| NM_198859    | PRICKLE2    | 0.378918673330304 | 0                  | 2.00E-04 | 1 | 9.00E-04 | 0 | NA | NA |
| NM_004056    | CA8         | 0.378464334393458 | 0                  | 2.00E-04 | 1 | 9.00E-04 | 0 | NA | NA |
| NM_003856    | IL1RL1      | 0.378009995456611 | 0                  | 2.00E-04 | 1 | 9.00E-04 | 0 | NA | NA |
| NR_104167    | IL1RL1      | 0.378009995456611 | 0                  | 2.00E-04 | 1 | 9.00E-04 | 0 | NA | NA |
| NM_001127615 | ENOX1       | 0.378009995456611 | 0                  | 2.00E-04 | 1 | 9.00E-04 | 0 | NA | NA |
| NM_001005202 | OR8K3       | 0.377555656519764 | 0                  | 2.00E-04 | 1 | 9.00E-04 | 0 | NA | NA |
| NM_001004330 | PLEKHG7     | 0.37664697864607  | 0                  | 2.00E-04 | 1 | 9.00E-04 | 0 | NA | NA |
| NM_021572    | ENPP5       | 0.37664697864607  | 0                  | 2.00E-04 | 1 | 9.00E-04 | 0 | NA | NA |
| NM_001141917 | FAM205A     | 0.376192639709223 | 0                  | 2.00E-04 | 1 | 9.00E-04 | 0 | NA | NA |
| NM_001005164 | OR52E2      | 0.375283961835529 | 0                  | 2.00E-04 | 1 | 9.00E-04 | 0 | NA | NA |
| NM_002001    | FCER1A      | 0.374829622898682 | 0                  | 2.00E-04 | 1 | 9.00E-04 | 0 | NA | NA |
| NM_001007527 | LMBRD2      | 0.374829622898682 | 0                  | 2.00E-04 | 1 | 9.00E-04 | 0 | NA | NA |
| NM_014689    | DOCK10      | 0.374375283961836 | 0                  | 2.00E-04 | 1 | 9.00E-04 | 0 | NA | NA |
| NM_001134665 | TRMT10A     | 0.374375283961836 | 0                  | 2.00E-04 | 1 | 9.00E-04 | 0 | NA | NA |
| NM_001134666 | TRMT10A     | 0.374375283961836 | 0                  | 2.00E-04 | 1 | 9.00E-04 | 0 | NA | NA |
| NM_033049    | MUC13       | 0.373920945024989 | 0                  | 2.00E-04 | 1 | 9.00E-04 | 0 | NA | NA |
| NM_138806    | CD200R1     | 0.373012267151295 | 0                  | 2.00E-04 | 1 | 9.00E-04 | 0 | NA | NA |
| NM_138940    | CD200R1     | 0.373012267151295 | 0                  | 4.00E-04 | 1 | 0.0012   | 0 | NA | NA |
| NM_138939    | CD200R1     | 0.373012267151295 | 0                  | 2.00E-04 | 1 | 9.00E-04 | 0 | NA | NA |
| NM_170780    | CD200R1     | 0.373012267151295 | 0                  | 2.00E-04 | 1 | 9.00E-04 | 0 | NA | NA |
| NM_023014    | PRAMEF2     | 0.371649250340754 | 0                  | 2.00E-04 | 1 | 9.00E-04 | 0 | NA | NA |
| NM_001040033 | CD53        | 0.371649250340754 | 0                  | 2.00E-04 | 1 | 9.00E-04 | 0 | NA | NA |
| NR_003339    | SNORD116-25 | 0.371649250340754 | 0                  | 2.00E-04 | 1 | 9.00E-04 | 0 | NA | NA |
| NM_016448    | DTL         | 0.371194911403907 | 0                  | 2.00E-04 | 1 | 9.00E-04 | 0 | NA | NA |
| NM_001201    | BMP3        | 0.371194911403907 | 0                  | 2.00E-04 | 1 | 9.00E-04 | 0 | NA | NA |
| NM_005912    | MC4R        | 0.371194911403907 | 0                  | 2.00E-04 | 1 | 9.00E-04 | 0 | NA | NA |
| NM_181789    | GLDN        | 0.369831894593367 | 0                  | 2.00E-04 | 1 | 9.00E-04 | 0 | NA | NA |
| NR_003716    | HOTAIR      | 0.369831894593367 | 0                  | 2.00E-04 | 1 | 9.00E-04 | 0 | NA | NA |
| NM_130846    | PTPRR       | 0.427987278509768 | 0.0581553839164016 | 2.00E-04 | 1 | 9.00E-04 | 0 | NA | NA |
| NR_073474    | PTPRR       | 0.427987278509768 | 0.0581553839164016 | 2.00E-04 | 1 | 9.00E-04 | 0 | NA | NA |
| NM_152539    | C3orf30     | 0.36937755565652  | 0                  | 2.00E-04 | 1 | 9.00E-04 | 0 | NA | NA |
| NM_003284    | TNP1        | 0.36937755565652  | 0                  | 2.00E-04 | 1 | 9.00E-04 | 0 | NA | NA |
| NR_029374    | LEF1-AS1    | 0.368923216719673 | 0                  | 2.00E-04 | 1 | 9.00E-04 | 0 | NA | NA |
| NR_029429    | PGCP1       | 0.368923216719673 | 0                  | 2.00E-04 | 1 | 9.00E-04 | 0 | NA | NA |

|              |            |                   |                    |          |   |          |   |    |    |
|--------------|------------|-------------------|--------------------|----------|---|----------|---|----|----|
| NR_028374    | SNORA80B   | 0.368014538845979 | 0                  | 2.00E-04 | 1 | 9.00E-04 | 0 | NA | NA |
| NR_001435    | HLA-DPB2   | 0.367560199909132 | 0                  | 2.00E-04 | 1 | 9.00E-04 | 0 | NA | NA |
| NM_080671    | KCNE4      | 0.367105860972285 | 0                  | 2.00E-04 | 1 | 9.00E-04 | 0 | NA | NA |
| NM_080282    | ABCA10     | 0.366651522035438 | 0                  | 4.00E-04 | 1 | 0.0012   | 0 | NA | NA |
| NM_198511    | LANCL3     | 0.366197183098592 | 0                  | 2.00E-04 | 1 | 9.00E-04 | 0 | NA | NA |
| NM_001170331 | LANCL3     | 0.366197183098592 | 0                  | 2.00E-04 | 1 | 9.00E-04 | 0 | NA | NA |
| NM_001145026 | PTPRQ      | 0.365742844161745 | 0                  | 2.00E-04 | 1 | 9.00E-04 | 0 | NA | NA |
| NM_018349    | MCTP2      | 0.365742844161745 | 0                  | 2.00E-04 | 1 | 9.00E-04 | 0 | NA | NA |
| NM_001159643 | MCTP2      | 0.365742844161745 | 0                  | 2.00E-04 | 1 | 9.00E-04 | 0 | NA | NA |
| NM_001037442 | RUFY3      | 0.365742844161745 | 0                  | 2.00E-04 | 1 | 9.00E-04 | 0 | NA | NA |
| NM_014961    | RUFY3      | 0.365742844161745 | 0                  | 2.00E-04 | 1 | 9.00E-04 | 0 | NA | NA |
| NM_152453    | TMCO5A     | 0.364834166288051 | 0                  | 2.00E-04 | 1 | 9.00E-04 | 0 | NA | NA |
| NM_004246    | GLP2R      | 0.364834166288051 | 0                  | 2.00E-04 | 1 | 9.00E-04 | 0 | NA | NA |
| NM_181873    | MTMR11     | 0.364379827351204 | 0                  | 4.00E-04 | 1 | 0.0012   | 0 | NA | NA |
| NM_001145862 | MTMR11     | 0.364379827351204 | 0                  | 6.00E-04 | 1 | 0.0038   | 0 | NA | NA |
| NM_000325    | PITX2      | 0.363925488414357 | 0                  | 2.00E-04 | 1 | 9.00E-04 | 0 | NA | NA |
| NR_051994    | DIAPH3-AS1 | 0.36347114947751  | 0                  | 2.00E-04 | 1 | 9.00E-04 | 0 | NA | NA |
| NM_002302    | LECT2      | 0.36347114947751  | 0                  | 2.00E-04 | 1 | 9.00E-04 | 0 | NA | NA |
| NM_022351    | NECAB1     | 0.363016810540663 | 0                  | 2.00E-04 | 1 | 9.00E-04 | 0 | NA | NA |
| NM_001127454 | DFNA5      | 0.362562471603816 | 0                  | 2.00E-04 | 1 | 9.00E-04 | 0 | NA | NA |
| NM_001127453 | DFNA5      | 0.362562471603816 | 0                  | 2.00E-04 | 1 | 9.00E-04 | 0 | NA | NA |
| NM_004403    | DFNA5      | 0.362562471603816 | 0                  | 2.00E-04 | 1 | 9.00E-04 | 0 | NA | NA |
| NR_051993    | DIAPH3-AS1 | 0.36210813266697  | 0                  | 2.00E-04 | 1 | 9.00E-04 | 0 | NA | NA |
| NM_001195261 | PDE4DIP    | 0.392548841435711 | 0.0304407087687415 | 2.00E-04 | 1 | 9.00E-04 | 0 | NA | NA |
| NM_002625    | PFKFB1     | 0.361653793730123 | 0                  | 2.00E-04 | 1 | 9.00E-04 | 0 | NA | NA |
| NR_073450    | PFKFB1     | 0.361653793730123 | 0                  | 2.00E-04 | 1 | 9.00E-04 | 0 | NA | NA |
| NM_001271804 | PFKFB1     | 0.361653793730123 | 0                  | 2.00E-04 | 1 | 9.00E-04 | 0 | NA | NA |
| NM_006187    | OAS3       | 0.361199454793276 | 0                  | 2.00E-04 | 1 | 9.00E-04 | 0 | NA | NA |
| NM_153699    | GSTA5      | 0.360745115856429 | 0                  | 2.00E-04 | 1 | 9.00E-04 | 0 | NA | NA |
| NM_001001995 | GPM6B      | 0.360290776919582 | 0                  | 2.00E-04 | 1 | 9.00E-04 | 0 | NA | NA |
| NM_005278    | GPM6B      | 0.360290776919582 | 0                  | 2.00E-04 | 1 | 9.00E-04 | 0 | NA | NA |
| NM_001001996 | GPM6B      | 0.360290776919582 | 0                  | 2.00E-04 | 1 | 9.00E-04 | 0 | NA | NA |
| NM_005832    | KCNMB2     | 0.359382099045888 | 0                  | 2.00E-04 | 1 | 9.00E-04 | 0 | NA | NA |
| NM_001278911 | KCNMB2     | 0.359382099045888 | 0                  | 2.00E-04 | 1 | 9.00E-04 | 0 | NA | NA |
| NM_003132    | SRM        | 0.358927760109041 | 0                  | 2.00E-04 | 1 | 9.00E-04 | 0 | NA | NA |
| NR_051997    | ZNF33BP1   | 0.358927760109041 | 0                  | 2.00E-04 | 1 | 9.00E-04 | 0 | NA | NA |
| NM_001184892 | FLAD1      | 0.358473421172194 | 0                  | 2.00E-04 | 1 | 9.00E-04 | 0 | NA | NA |
| NM_201398    | FLAD1      | 0.358473421172194 | 0                  | 2.00E-04 | 1 | 9.00E-04 | 0 | NA | NA |
| NM_025207    | FLAD1      | 0.358473421172194 | 0                  | 2.00E-04 | 1 | 9.00E-04 | 0 | NA | NA |
| NM_001184891 | FLAD1      | 0.358473421172194 | 0                  | 2.00E-04 | 1 | 9.00E-04 | 0 | NA | NA |
| NM_138800    | TRIM43     | 0.358473421172194 | 0                  | 2.00E-04 | 1 | 9.00E-04 | 0 | NA | NA |

|              |         |                   |                    |          |   |          |   |    |    |
|--------------|---------|-------------------|--------------------|----------|---|----------|---|----|----|
| NM_133437    | TTN     | 0.358473421172194 | 0                  | 2.00E-04 | 1 | 9.00E-04 | 0 | NA | NA |
| NM_001267550 | TTN     | 0.358473421172194 | 0                  | 2.00E-04 | 1 | 9.00E-04 | 0 | NA | NA |
| NM_001256850 | TTN     | 0.358473421172194 | 0                  | 2.00E-04 | 1 | 9.00E-04 | 0 | NA | NA |
| NM_133432    | TTN     | 0.358473421172194 | 0                  | 2.00E-04 | 1 | 9.00E-04 | 0 | NA | NA |
| NM_003319    | TTN     | 0.358473421172194 | 0                  | 2.00E-04 | 1 | 9.00E-04 | 0 | NA | NA |
| NM_133378    | TTN     | 0.358473421172194 | 0                  | 2.00E-04 | 1 | 9.00E-04 | 0 | NA | NA |
| NM_133379    | TTN     | 0.358473421172194 | 0                  | 2.00E-04 | 1 | 9.00E-04 | 0 | NA | NA |
| NM_020411    | XAGE1D  | 0.358473421172194 | 0                  | 2.00E-04 | 1 | 9.00E-04 | 0 | NA | NA |
| NM_001097592 | XAGE1A  | 0.358473421172194 | 0                  | 2.00E-04 | 1 | 9.00E-04 | 0 | NA | NA |
| NM_001097597 | XAGE1C  | 0.358473421172194 | 0                  | 2.00E-04 | 1 | 9.00E-04 | 0 | NA | NA |
| NM_001097594 | XAGE1B  | 0.358473421172194 | 0                  | 2.00E-04 | 1 | 9.00E-04 | 0 | NA | NA |
| NM_001097605 | XAGE1E  | 0.358473421172194 | 0                  | 2.00E-04 | 1 | 9.00E-04 | 0 | NA | NA |
| NM_001097596 | XAGE1B  | 0.358473421172194 | 0                  | 2.00E-04 | 1 | 9.00E-04 | 0 | NA | NA |
| NM_001097604 | XAGE1E  | 0.358473421172194 | 0                  | 2.00E-04 | 1 | 9.00E-04 | 0 | NA | NA |
| NM_001097593 | XAGE1A  | 0.358473421172194 | 0                  | 2.00E-04 | 1 | 9.00E-04 | 0 | NA | NA |
| NM_133430    | XAGE1D  | 0.358473421172194 | 0                  | 2.00E-04 | 1 | 9.00E-04 | 0 | NA | NA |
| NM_001097598 | XAGE1C  | 0.358473421172194 | 0                  | 2.00E-04 | 1 | 9.00E-04 | 0 | NA | NA |
| NM_001099747 | SYBU    | 0.357564743298501 | 0                  | 2.00E-04 | 1 | 9.00E-04 | 0 | NA | NA |
| NM_017786    | SYBU    | 0.357564743298501 | 0                  | 2.00E-04 | 1 | 9.00E-04 | 0 | NA | NA |
| NM_001099748 | SYBU    | 0.357564743298501 | 0                  | 2.00E-04 | 1 | 9.00E-04 | 0 | NA | NA |
| NM_001099750 | SYBU    | 0.357564743298501 | 0                  | 2.00E-04 | 1 | 9.00E-04 | 0 | NA | NA |
| NM_001099749 | SYBU    | 0.357564743298501 | 0                  | 2.00E-04 | 1 | 9.00E-04 | 0 | NA | NA |
| NM_001099435 | SPDYE5  | 0.357110404361654 | 0                  | 2.00E-04 | 1 | 9.00E-04 | 0 | NA | NA |
| NM_004272    | HOMER1  | 0.357110404361654 | 0                  | 2.00E-04 | 1 | 9.00E-04 | 0 | NA | NA |
| NM_001277077 | HOMER1  | 0.357110404361654 | 0                  | 2.00E-04 | 1 | 9.00E-04 | 0 | NA | NA |
| NM_001277078 | HOMER1  | 0.357110404361654 | 0                  | 2.00E-04 | 1 | 9.00E-04 | 0 | NA | NA |
| NM_031275    | TEX12   | 0.355747387551113 | 0                  | 2.00E-04 | 1 | 9.00E-04 | 0 | NA | NA |
| NM_207468    | FAM177B | 0.380736029077692 | 0.0254429804634257 | 2.00E-04 | 1 | 9.00E-04 | 0 | NA | NA |
| NM_018935    | PCDHB15 | 0.355293048614266 | 0                  | 2.00E-04 | 1 | 9.00E-04 | 0 | NA | NA |
| NM_153206    | AMICA1  | 0.355293048614266 | 0                  | 2.00E-04 | 1 | 9.00E-04 | 0 | NA | NA |
| NM_001165978 | PROM2   | 0.354838709677419 | 0                  | 2.00E-04 | 1 | 9.00E-04 | 0 | NA | NA |
| NM_001165977 | PROM2   | 0.354838709677419 | 0                  | 2.00E-04 | 1 | 9.00E-04 | 0 | NA | NA |
| NM_144707    | PROM2   | 0.354838709677419 | 0                  | 2.00E-04 | 1 | 9.00E-04 | 0 | NA | NA |
| NM_207296    | MBNL1   | 0.354838709677419 | 0                  | 2.00E-04 | 1 | 9.00E-04 | 0 | NA | NA |
| NM_207295    | MBNL1   | 0.354838709677419 | 0                  | 2.00E-04 | 1 | 9.00E-04 | 0 | NA | NA |
| NM_207294    | MBNL1   | 0.354838709677419 | 0                  | 2.00E-04 | 1 | 9.00E-04 | 0 | NA | NA |
| NM_207293    | MBNL1   | 0.354838709677419 | 0                  | 2.00E-04 | 1 | 9.00E-04 | 0 | NA | NA |
| NM_207297    | MBNL1   | 0.354838709677419 | 0                  | 2.00E-04 | 1 | 9.00E-04 | 0 | NA | NA |
| NR_033256    | XAGE1D  | 0.354838709677419 | 0                  | 2.00E-04 | 1 | 9.00E-04 | 0 | NA | NA |
| NR_033254    | XAGE1B  | 0.354838709677419 | 0                  | 2.00E-04 | 1 | 9.00E-04 | 0 | NA | NA |
| NR_033253    | XAGE1A  | 0.354838709677419 | 0                  | 2.00E-04 | 1 | 9.00E-04 | 0 | NA | NA |

|              |           |                   |   |          |   |          |   |    |    |
|--------------|-----------|-------------------|---|----------|---|----------|---|----|----|
| NR_033251    | XAGE1C    | 0.354838709677419 | 0 | 2.00E-04 | 1 | 9.00E-04 | 0 | NA | NA |
| NR_033257    | XAGE1E    | 0.354838709677419 | 0 | 2.00E-04 | 1 | 9.00E-04 | 0 | NA | NA |
| NR_023348    | GAS8      | 0.353930031803726 | 0 | 2.00E-04 | 1 | 9.00E-04 | 0 | NA | NA |
| NM_001481    | GAS8      | 0.353930031803726 | 0 | 2.00E-04 | 1 | 9.00E-04 | 0 | NA | NA |
| NM_172160    | KCNAB1    | 0.353930031803726 | 0 | 2.00E-04 | 1 | 9.00E-04 | 0 | NA | NA |
| NM_001002923 | IGFL4     | 0.353475692866879 | 0 | 2.00E-04 | 1 | 9.00E-04 | 0 | NA | NA |
| NR_033909    | ECRP      | 0.353021353930032 | 0 | 2.00E-04 | 1 | 9.00E-04 | 0 | NA | NA |
| NM_205850    | SLC24A5   | 0.353021353930032 | 0 | 2.00E-04 | 1 | 9.00E-04 | 0 | NA | NA |
| NM_014175    | MRPL15    | 0.353021353930032 | 0 | 2.00E-04 | 1 | 9.00E-04 | 0 | NA | NA |
| NM_198474    | OLFML1    | 0.352112676056338 | 0 | 2.00E-04 | 1 | 9.00E-04 | 0 | NA | NA |
| NM_001204178 | CHODL     | 0.352112676056338 | 0 | 2.00E-04 | 1 | 9.00E-04 | 0 | NA | NA |
| NM_001204177 | CHODL     | 0.352112676056338 | 0 | 2.00E-04 | 1 | 9.00E-04 | 0 | NA | NA |
| NM_001204176 | CHODL     | 0.352112676056338 | 0 | 2.00E-04 | 1 | 9.00E-04 | 0 | NA | NA |
| NM_001204175 | CHODL     | 0.352112676056338 | 0 | 2.00E-04 | 1 | 9.00E-04 | 0 | NA | NA |
| NR_024123    | PBX3      | 0.351203998182644 | 0 | 2.00E-04 | 1 | 9.00E-04 | 0 | NA | NA |
| NM_006195    | PBX3      | 0.351203998182644 | 0 | 2.00E-04 | 1 | 9.00E-04 | 0 | NA | NA |
| NR_024122    | PBX3      | 0.351203998182644 | 0 | 2.00E-04 | 1 | 9.00E-04 | 0 | NA | NA |
| NM_002268    | KPNA4     | 0.351203998182644 | 0 | 2.00E-04 | 1 | 9.00E-04 | 0 | NA | NA |
| NM_001270765 | CHST15    | 0.350749659245797 | 0 | 2.00E-04 | 1 | 9.00E-04 | 0 | NA | NA |
| NM_001270764 | CHST15    | 0.350749659245797 | 0 | 2.00E-04 | 1 | 9.00E-04 | 0 | NA | NA |
| NR_003506    | PLGLA     | 0.35029532030895  | 0 | 2.00E-04 | 1 | 9.00E-04 | 0 | NA | NA |
| NM_173362    | RFESD     | 0.35029532030895  | 0 | 2.00E-04 | 1 | 9.00E-04 | 0 | NA | NA |
| NM_001131065 | RFESD     | 0.35029532030895  | 0 | 2.00E-04 | 1 | 9.00E-04 | 0 | NA | NA |
| NM_001139444 | TRAPPC3L  | 0.35029532030895  | 0 | 2.00E-04 | 1 | 9.00E-04 | 0 | NA | NA |
| NM_001005170 | OR52I2    | 0.349840981372104 | 0 | 2.00E-04 | 1 | 9.00E-04 | 0 | NA | NA |
| NM_001202    | BMP4      | 0.349840981372104 | 0 | 2.00E-04 | 1 | 9.00E-04 | 0 | NA | NA |
| NM_130850    | BMP4      | 0.349840981372104 | 0 | 2.00E-04 | 1 | 9.00E-04 | 0 | NA | NA |
| NM_004106    | FCER1G    | 0.349386642435257 | 0 | 2.00E-04 | 1 | 9.00E-04 | 0 | NA | NA |
| NR_026553    | LINC00161 | 0.349386642435257 | 0 | 2.00E-04 | 1 | 9.00E-04 | 0 | NA | NA |
| NR_026552    | LINC00161 | 0.349386642435257 | 0 | 2.00E-04 | 1 | 9.00E-04 | 0 | NA | NA |
| NM_198185    | OVCH2     | 0.349386642435257 | 0 | 2.00E-04 | 1 | 9.00E-04 | 0 | NA | NA |
| NM_138804    | M1AP      | 0.349386642435257 | 0 | 2.00E-04 | 1 | 9.00E-04 | 0 | NA | NA |
| NM_001281296 | M1AP      | 0.349386642435257 | 0 | 2.00E-04 | 1 | 9.00E-04 | 0 | NA | NA |
| NM_001281295 | M1AP      | 0.349386642435257 | 0 | 2.00E-04 | 1 | 9.00E-04 | 0 | NA | NA |
| NM_018652    | GOLGA6B   | 0.34893230349841  | 0 | 2.00E-04 | 1 | 9.00E-04 | 0 | NA | NA |
| NM_033045    | KRT84     | 0.34893230349841  | 0 | 2.00E-04 | 1 | 9.00E-04 | 0 | NA | NA |
| NM_022728    | NEUROD6   | 0.34893230349841  | 0 | 2.00E-04 | 1 | 9.00E-04 | 0 | NA | NA |
| NM_001004688 | OR2M2     | 0.348477964561563 | 0 | 2.00E-04 | 1 | 9.00E-04 | 0 | NA | NA |
| NM_198074    | OR2C3     | 0.348477964561563 | 0 | 2.00E-04 | 1 | 9.00E-04 | 0 | NA | NA |
| NM_001199868 | GLRX3     | 0.348023625624716 | 0 | 2.00E-04 | 1 | 9.00E-04 | 0 | NA | NA |
| NM_006541    | GLRX3     | 0.348023625624716 | 0 | 2.00E-04 | 1 | 9.00E-04 | 0 | NA | NA |

|              |          |                   |                    |          |        |          |   |    |    |
|--------------|----------|-------------------|--------------------|----------|--------|----------|---|----|----|
| NM_182489    | STRA8    | 0.348023625624716 | 0                  | 2.00E-04 | 1      | 9.00E-04 | 0 | NA | NA |
| NM_003262    | SEC62    | 0.347569286687869 | 0                  | 2.00E-04 | 1      | 9.00E-04 | 0 | NA | NA |
| NM_024066    | ERI3     | 0.347569286687869 | 0                  | 2.00E-04 | 1      | 9.00E-04 | 0 | NA | NA |
| NM_176884    | TAS2R43  | 0.347569286687869 | 0                  | 2.00E-04 | 1      | 9.00E-04 | 0 | NA | NA |
| NM_024503    | HIVEP3   | 0.347114947751022 | 0                  | 2.00E-04 | 1      | 9.00E-04 | 0 | NA | NA |
| NM_001127714 | HIVEP3   | 0.347114947751022 | 0                  | 2.00E-04 | 1      | 9.00E-04 | 0 | NA | NA |
| NR_038260    | HIVEP3   | 0.347114947751022 | 0                  | 2.00E-04 | 1      | 9.00E-04 | 0 | NA | NA |
| NM_017807    | OSGEP    | 0.346660608814175 | 0                  | 2.00E-04 | 1      | 9.00E-04 | 0 | NA | NA |
| NR_038371    | FLJ45974 | 0.346206269877328 | 0                  | 2.00E-04 | 1      | 9.00E-04 | 0 | NA | NA |
| NM_001105069 | ACSM2B   | 0.345751930940482 | 0                  | 2.00E-04 | 1      | 9.00E-04 | 0 | NA | NA |
| NM_182617    | ACSM2B   | 0.345751930940482 | 0                  | 2.00E-04 | 1      | 9.00E-04 | 0 | NA | NA |
| NM_032160    | DSEL     | 0.345751930940482 | 0                  | 2.00E-04 | 1      | 9.00E-04 | 0 | NA | NA |
| NM_005272    | GNAT2    | 0.345297592003635 | 0                  | 2.00E-04 | 1      | 9.00E-04 | 0 | NA | NA |
| NM_005130    | FGFBP1   | 0.344388914129941 | 0                  | 2.00E-04 | 1      | 9.00E-04 | 0 | NA | NA |
| NM_001085375 | C1orf226 | 0.343934575193094 | 0                  | 4.00E-04 | 0.9996 | 0.0012   | 0 | NA | NA |
| NM_000324    | RHAG     | 0.343934575193094 | 0                  | 2.00E-04 | 1      | 9.00E-04 | 0 | NA | NA |
| NM_031907    | USP26    | 0.3430258973194   | 0                  | 2.00E-04 | 1      | 9.00E-04 | 0 | NA | NA |
| NM_198485    | TPRG1    | 0.342571558382553 | 0                  | 2.00E-04 | 1      | 9.00E-04 | 0 | NA | NA |
| NM_000245    | MET      | 0.342571558382553 | 0                  | 2.00E-04 | 1      | 9.00E-04 | 0 | NA | NA |
| NM_001127500 | MET      | 0.342571558382553 | 0                  | 2.00E-04 | 1      | 9.00E-04 | 0 | NA | NA |
| NM_015233    | MTUS2    | 0.34166288050886  | 0                  | 2.00E-04 | 1      | 9.00E-04 | 0 | NA | NA |
| NM_001004452 | OR1J4    | 0.34166288050886  | 0                  | 2.00E-04 | 1      | 9.00E-04 | 0 | NA | NA |
| NM_022757    | CCDC14   | 0.34166288050886  | 0                  | 2.00E-04 | 1      | 9.00E-04 | 0 | NA | NA |
| NM_001004705 | OR4D10   | 0.368923216719673 | 0.0272603362108133 | 2.00E-04 | 1      | 9.00E-04 | 0 | NA | NA |
| NM_016267    | VGLL1    | 0.341208541572013 | 0                  | 2.00E-04 | 1      | 9.00E-04 | 0 | NA | NA |
| NM_002313    | ABLIM1   | 0.341208541572013 | 0                  | 2.00E-04 | 1      | 9.00E-04 | 0 | NA | NA |
| NM_001115156 | GDI2     | 0.340754202635166 | 0                  | 2.00E-04 | 1      | 9.00E-04 | 0 | NA | NA |
| NM_001494    | GDI2     | 0.340754202635166 | 0                  | 2.00E-04 | 1      | 9.00E-04 | 0 | NA | NA |
| NM_001004743 | OR5M9    | 0.340299863698319 | 0                  | 2.00E-04 | 1      | 9.00E-04 | 0 | NA | NA |
| NM_001199189 | CCNH     | 0.340299863698319 | 0                  | 2.00E-04 | 1      | 9.00E-04 | 0 | NA | NA |
| NM_001239    | CCNH     | 0.340299863698319 | 0                  | 2.00E-04 | 1      | 9.00E-04 | 0 | NA | NA |
| NM_198273    | LYSMD3   | 0.340299863698319 | 0                  | 2.00E-04 | 1      | 9.00E-04 | 0 | NA | NA |
| NM_001198834 | PDE4DIP  | 0.392548841435711 | 0.052703316674239  | 2.00E-04 | 1      | 9.00E-04 | 0 | NA | NA |
| NM_014644    | PDE4DIP  | 0.392548841435711 | 0.052703316674239  | 2.00E-04 | 1      | 9.00E-04 | 0 | NA | NA |
| NM_001002812 | PDE4DIP  | 0.392548841435711 | 0.052703316674239  | 2.00E-04 | 1      | 9.00E-04 | 0 | NA | NA |
| NM_001002810 | PDE4DIP  | 0.392548841435711 | 0.052703316674239  | 2.00E-04 | 1      | 9.00E-04 | 0 | NA | NA |
| NM_002905    | RDH5     | 0.339391185824625 | 0                  | 2.00E-04 | 1      | 9.00E-04 | 0 | NA | NA |
| NM_001199771 | RDH5     | 0.339391185824625 | 0                  | 2.00E-04 | 1      | 9.00E-04 | 0 | NA | NA |
| NM_052851    | STARD13  | 0.338482507950931 | 0                  | 2.00E-04 | 1      | 9.00E-04 | 0 | NA | NA |
| NM_001243474 | STARD13  | 0.338482507950931 | 0                  | 2.00E-04 | 1      | 9.00E-04 | 0 | NA | NA |
| NM_002704    | PPBP     | 0.338482507950931 | 0                  | 2.00E-04 | 1      | 9.00E-04 | 0 | NA | NA |

|              |           |                   |   |          |   |          |   |    |    |
|--------------|-----------|-------------------|---|----------|---|----------|---|----|----|
| NM_021146    | ANGPTL7   | 0.337119491140391 | 0 | 2.00E-04 | 1 | 9.00E-04 | 0 | NA | NA |
| NR_003945    | GVINP1    | 0.337119491140391 | 0 | 2.00E-04 | 1 | 9.00E-04 | 0 | NA | NA |
| NM_006923    | SDF2      | 0.337119491140391 | 0 | 2.00E-04 | 1 | 9.00E-04 | 0 | NA | NA |
| NR_045585    | SDF2      | 0.337119491140391 | 0 | 2.00E-04 | 1 | 9.00E-04 | 0 | NA | NA |
| NM_001172814 | SLC30A8   | 0.336665152203544 | 0 | 2.00E-04 | 1 | 9.00E-04 | 0 | NA | NA |
| NM_173851    | SLC30A8   | 0.336665152203544 | 0 | 2.00E-04 | 1 | 9.00E-04 | 0 | NA | NA |
| NM_001010977 | METTL21C  | 0.336665152203544 | 0 | 2.00E-04 | 1 | 9.00E-04 | 0 | NA | NA |
| NM_001004695 | OR2T33    | 0.336210813266697 | 0 | 2.00E-04 | 1 | 9.00E-04 | 0 | NA | NA |
| NM_005420    | SULT1E1   | 0.336210813266697 | 0 | 2.00E-04 | 1 | 9.00E-04 | 0 | NA | NA |
| NM_001032284 | TMPO      | 0.33575647432985  | 0 | 2.00E-04 | 1 | 9.00E-04 | 0 | NA | NA |
| NM_001032283 | TMPO      | 0.33575647432985  | 0 | 2.00E-04 | 1 | 9.00E-04 | 0 | NA | NA |
| NM_003276    | TMPO      | 0.33575647432985  | 0 | 2.00E-04 | 1 | 9.00E-04 | 0 | NA | NA |
| NM_033089    | ZCCHC3    | 0.33575647432985  | 0 | 2.00E-04 | 1 | 9.00E-04 | 0 | NA | NA |
| NM_152292    | TRMT10A   | 0.33575647432985  | 0 | 2.00E-04 | 1 | 9.00E-04 | 0 | NA | NA |
| NM_015393    | PARM1     | 0.335302135393003 | 0 | 2.00E-04 | 1 | 9.00E-04 | 0 | NA | NA |
| NM_080874    | ASB5      | 0.335302135393003 | 0 | 2.00E-04 | 1 | 9.00E-04 | 0 | NA | NA |
| NR_002442    | SNORD18B  | 0.334847796456156 | 0 | 2.00E-04 | 1 | 9.00E-04 | 0 | NA | NA |
| NM_021973    | HAND2     | 0.334847796456156 | 0 | 2.00E-04 | 1 | 9.00E-04 | 0 | NA | NA |
| NM_005863    | NET1      | 0.334393457519309 | 0 | 2.00E-04 | 1 | 9.00E-04 | 0 | NA | NA |
| NR_073040    | NET1      | 0.334393457519309 | 0 | 2.00E-04 | 1 | 9.00E-04 | 0 | NA | NA |
| NM_001256570 | RXRG      | 0.334393457519309 | 0 | 2.00E-04 | 1 | 9.00E-04 | 0 | NA | NA |
| NM_006917    | RXRG      | 0.334393457519309 | 0 | 2.00E-04 | 1 | 9.00E-04 | 0 | NA | NA |
| NR_033824    | RXRG      | 0.334393457519309 | 0 | 2.00E-04 | 1 | 9.00E-04 | 0 | NA | NA |
| NR_104162    | LOC283045 | 0.334393457519309 | 0 | 2.00E-04 | 1 | 9.00E-04 | 0 | NA | NA |
| NM_001206947 | PICALM    | 0.334393457519309 | 0 | 2.00E-04 | 1 | 9.00E-04 | 0 | NA | NA |
| NM_001013628 | DCAF12L2  | 0.334393457519309 | 0 | 2.00E-04 | 1 | 9.00E-04 | 0 | NA | NA |
| NM_001004701 | OR4C16    | 0.333939118582463 | 0 | 2.00E-04 | 1 | 9.00E-04 | 0 | NA | NA |
| NM_006121    | KRT1      | 0.333939118582463 | 0 | 2.00E-04 | 1 | 9.00E-04 | 0 | NA | NA |
| NM_032583    | ABCC11    | 0.333939118582463 | 0 | 2.00E-04 | 1 | 9.00E-04 | 0 | NA | NA |
| NM_145186    | ABCC11    | 0.333939118582463 | 0 | 2.00E-04 | 1 | 9.00E-04 | 0 | NA | NA |
| NM_001102562 | MARCH11   | 0.333939118582463 | 0 | 2.00E-04 | 1 | 9.00E-04 | 0 | NA | NA |
| NM_001073    | UGT2B11   | 0.333030440708769 | 0 | 2.00E-04 | 1 | 9.00E-04 | 0 | NA | NA |
| NM_001204070 | ANKS1B    | 0.332576101771922 | 0 | 2.00E-04 | 1 | 9.00E-04 | 0 | NA | NA |
| NM_001204069 | ANKS1B    | 0.332576101771922 | 0 | 2.00E-04 | 1 | 9.00E-04 | 0 | NA | NA |
| NM_001204068 | ANKS1B    | 0.332576101771922 | 0 | 2.00E-04 | 1 | 9.00E-04 | 0 | NA | NA |
| NM_181670    | ANKS1B    | 0.332576101771922 | 0 | 2.00E-04 | 1 | 9.00E-04 | 0 | NA | NA |
| NM_001204066 | ANKS1B    | 0.332576101771922 | 0 | 2.00E-04 | 1 | 9.00E-04 | 0 | NA | NA |
| NM_020140    | ANKS1B    | 0.332576101771922 | 0 | 2.00E-04 | 1 | 9.00E-04 | 0 | NA | NA |
| NM_006868    | RAB31     | 0.332121762835075 | 0 | 2.00E-04 | 1 | 9.00E-04 | 0 | NA | NA |
| NM_016048    | ISOC1     | 0.332121762835075 | 0 | 2.00E-04 | 1 | 9.00E-04 | 0 | NA | NA |
| NM_002563    | P2RY1     | 0.331667423898228 | 0 | 2.00E-04 | 1 | 9.00E-04 | 0 | NA | NA |

|              |             |                   |                    |          |   |          |   |    |    |
|--------------|-------------|-------------------|--------------------|----------|---|----------|---|----|----|
| NM_001030019 | SUN3        | 0.331667423898228 | 0                  | 2.00E-04 | 1 | 9.00E-04 | 0 | NA | NA |
| NM_152782    | SUN3        | 0.331667423898228 | 0                  | 2.00E-04 | 1 | 9.00E-04 | 0 | NA | NA |
| NM_001284350 | SUN3        | 0.331667423898228 | 0                  | 2.00E-04 | 1 | 9.00E-04 | 0 | NA | NA |
| NR_038828    | EFCAB14-AS1 | 0.331213084961381 | 0                  | 2.00E-04 | 1 | 9.00E-04 | 0 | NA | NA |
| NR_038827    | EFCAB14-AS1 | 0.331213084961381 | 0                  | 2.00E-04 | 1 | 9.00E-04 | 0 | NA | NA |
| NM_001002907 | OR8K1       | 0.331213084961381 | 0                  | 2.00E-04 | 1 | 9.00E-04 | 0 | NA | NA |
| NM_006608    | PHTF1       | 0.331213084961381 | 0                  | 2.00E-04 | 1 | 9.00E-04 | 0 | NA | NA |
| NM_001143829 | CCDC68      | 0.330758746024534 | 0                  | 2.00E-04 | 1 | 9.00E-04 | 0 | NA | NA |
| NM_001010912 | C10orf120   | 0.330304407087687 | 0                  | 2.00E-04 | 1 | 9.00E-04 | 0 | NA | NA |
| NM_003270    | TSPAN6      | 0.330304407087687 | 0                  | 2.00E-04 | 1 | 9.00E-04 | 0 | NA | NA |
| NM_001278743 | TSPAN6      | 0.330304407087687 | 0                  | 2.00E-04 | 1 | 9.00E-04 | 0 | NA | NA |
| NM_001278742 | TSPAN6      | 0.330304407087687 | 0                  | 2.00E-04 | 1 | 9.00E-04 | 0 | NA | NA |
| NM_001278741 | TSPAN6      | 0.330304407087687 | 0                  | 2.00E-04 | 1 | 9.00E-04 | 0 | NA | NA |
| NM_001135865 | NPIPB5      | 0.329850068150841 | 0                  | 2.00E-04 | 1 | 9.00E-04 | 0 | NA | NA |
| NM_014213    | HOXD9       | 0.43071331213085  | 0.100863243980009  | 2.00E-04 | 1 | 9.00E-04 | 0 | NA | NA |
| NM_001193306 | FPR1        | 0.329850068150841 | 0                  | 2.00E-04 | 1 | 9.00E-04 | 0 | NA | NA |
| NM_002029    | FPR1        | 0.329850068150841 | 0                  | 2.00E-04 | 1 | 9.00E-04 | 0 | NA | NA |
| NM_020905    | RDH14       | 0.329850068150841 | 0                  | 2.00E-04 | 1 | 9.00E-04 | 0 | NA | NA |
| NM_000870    | HTR4        | 0.329850068150841 | 0                  | 2.00E-04 | 1 | 9.00E-04 | 0 | NA | NA |
| NM_001098526 | AMICA1      | 0.329395729213994 | 0                  | 2.00E-04 | 1 | 9.00E-04 | 0 | NA | NA |
| NM_001190214 | PPIP5K1     | 0.329395729213994 | 0                  | 2.00E-04 | 1 | 9.00E-04 | 0 | NA | NA |
| NM_001130858 | PPIP5K1     | 0.329395729213994 | 0                  | 2.00E-04 | 1 | 9.00E-04 | 0 | NA | NA |
| NM_001130859 | PPIP5K1     | 0.329395729213994 | 0                  | 2.00E-04 | 1 | 9.00E-04 | 0 | NA | NA |
| NM_001009894 | C12orf29    | 0.3284870513403   | 0                  | 2.00E-04 | 1 | 9.00E-04 | 0 | NA | NA |
| NM_145811    | CACNG5      | 0.3284870513403   | 0                  | 2.00E-04 | 1 | 9.00E-04 | 0 | NA | NA |
| NM_006773    | DDX18       | 0.3284870513403   | 0                  | 2.00E-04 | 1 | 9.00E-04 | 0 | NA | NA |
| NR_015400    | LINC00879   | 0.3284870513403   | 0                  | 2.00E-04 | 1 | 9.00E-04 | 0 | NA | NA |
| NM_033670    | CCNB3       | 0.3284870513403   | 0                  | 2.00E-04 | 1 | 9.00E-04 | 0 | NA | NA |
| NM_033031    | CCNB3       | 0.3284870513403   | 0                  | 2.00E-04 | 1 | 9.00E-04 | 0 | NA | NA |
| NM_018833    | TAP2        | 0.346660608814175 | 0.0181735574738755 | 2.00E-04 | 1 | 9.00E-04 | 0 | NA | NA |
| NM_000544    | TAP2        | 0.346660608814175 | 0.0181735574738755 | 2.00E-04 | 1 | 9.00E-04 | 0 | NA | NA |
| NM_153840    | GPR110      | 0.327578373466606 | 0                  | 2.00E-04 | 1 | 9.00E-04 | 0 | NA | NA |
| NM_025048    | GPR110      | 0.327578373466606 | 0                  | 2.00E-04 | 1 | 9.00E-04 | 0 | NA | NA |
| NM_001007102 | L3MBTL3     | 0.327124034529759 | 0                  | 2.00E-04 | 1 | 9.00E-04 | 0 | NA | NA |
| NM_032438    | L3MBTL3     | 0.327124034529759 | 0                  | 2.00E-04 | 1 | 9.00E-04 | 0 | NA | NA |
| NM_031962    | KRTAP9-3    | 0.326669695592912 | 0                  | 2.00E-04 | 1 | 9.00E-04 | 0 | NA | NA |
| NM_018342    | TMEM144     | 0.326669695592912 | 0                  | 2.00E-04 | 1 | 9.00E-04 | 0 | NA | NA |
| NM_199290    | NACA2       | 0.326669695592912 | 0                  | 2.00E-04 | 1 | 9.00E-04 | 0 | NA | NA |
| NM_001130518 | CSGALNACT1  | 0.326669695592912 | 0                  | 2.00E-04 | 1 | 9.00E-04 | 0 | NA | NA |
| NM_018436    | ALLC        | 0.325761017719219 | 0                  | 2.00E-04 | 1 | 9.00E-04 | 0 | NA | NA |
| NM_003092    | SNRNP2      | 0.325761017719219 | 0                  | 2.00E-04 | 1 | 9.00E-04 | 0 | NA | NA |

|              |                  |                   |                    |          |   |          |   |    |    |
|--------------|------------------|-------------------|--------------------|----------|---|----------|---|----|----|
| NM_198220    | <i>SNRPB2</i>    | 0.325761017719219 | 0                  | 2.00E-04 | 1 | 9.00E-04 | 0 | NA | NA |
| NM_001005188 | <i>OR6X1</i>     | 0.325761017719219 | 0                  | 2.00E-04 | 1 | 9.00E-04 | 0 | NA | NA |
| NM_001127505 | <i>ASAH1</i>     | 0.325761017719219 | 0                  | 2.00E-04 | 1 | 9.00E-04 | 0 | NA | NA |
| NM_004315    | <i>ASAH1</i>     | 0.325761017719219 | 0                  | 2.00E-04 | 1 | 9.00E-04 | 0 | NA | NA |
| NM_170737    | <i>KCNJ15</i>    | 0.324398000908678 | 0                  | 2.00E-04 | 1 | 9.00E-04 | 0 | NA | NA |
| NR_002555    | <i>LOC613037</i> | 0.323943661971831 | 0                  | 2.00E-04 | 1 | 9.00E-04 | 0 | NA | NA |
| NM_001102559 | <i>PPAPDC1B</i>  | 0.323943661971831 | 0                  | 2.00E-04 | 1 | 9.00E-04 | 0 | NA | NA |
| NM_001102560 | <i>PPAPDC1B</i>  | 0.323943661971831 | 0                  | 2.00E-04 | 1 | 9.00E-04 | 0 | NA | NA |
| NM_032483    | <i>PPAPDC1B</i>  | 0.323943661971831 | 0                  | 2.00E-04 | 1 | 9.00E-04 | 0 | NA | NA |
| NM_001164646 | <i>SFTPA1</i>    | 0.323489323034984 | 0                  | 2.00E-04 | 1 | 9.00E-04 | 0 | NA | NA |
| NM_001164645 | <i>SFTPA1</i>    | 0.323489323034984 | 0                  | 2.00E-04 | 1 | 9.00E-04 | 0 | NA | NA |
| NM_001164644 | <i>SFTPA1</i>    | 0.323489323034984 | 0                  | 2.00E-04 | 1 | 9.00E-04 | 0 | NA | NA |
| NM_001093770 | <i>SFTPA1</i>    | 0.323489323034984 | 0                  | 2.00E-04 | 1 | 9.00E-04 | 0 | NA | NA |
| NM_001164647 | <i>SFTPA1</i>    | 0.323489323034984 | 0                  | 2.00E-04 | 1 | 9.00E-04 | 0 | NA | NA |
| NM_005411    | <i>SFTPA1</i>    | 0.323489323034984 | 0                  | 2.00E-04 | 1 | 9.00E-04 | 0 | NA | NA |
| NM_144997    | <i>FLCN</i>      | 0.323489323034984 | 0                  | 2.00E-04 | 1 | 9.00E-04 | 0 | NA | NA |
| NM_144606    | <i>FLCN</i>      | 0.323489323034984 | 0                  | 2.00E-04 | 1 | 9.00E-04 | 0 | NA | NA |
| NM_016512    | <i>SPAG11B</i>   | 0.323489323034984 | 0                  | 2.00E-04 | 1 | 9.00E-04 | 0 | NA | NA |
| NM_058203    | <i>SPAG11B</i>   | 0.323489323034984 | 0                  | 2.00E-04 | 1 | 9.00E-04 | 0 | NA | NA |
| NM_058201    | <i>SPAG11B</i>   | 0.323489323034984 | 0                  | 2.00E-04 | 1 | 9.00E-04 | 0 | NA | NA |
| NM_058202    | <i>SPAG11B</i>   | 0.323489323034984 | 0                  | 2.00E-04 | 1 | 9.00E-04 | 0 | NA | NA |
| NM_058200    | <i>SPAG11B</i>   | 0.323489323034984 | 0                  | 2.00E-04 | 1 | 9.00E-04 | 0 | NA | NA |
| NM_000625    | <i>NOS2</i>      | 0.323034984098137 | 0                  | 2.00E-04 | 1 | 9.00E-04 | 0 | NA | NA |
| NM_176876    | <i>P2RY12</i>    | 0.323034984098137 | 0                  | 2.00E-04 | 1 | 9.00E-04 | 0 | NA | NA |
| NM_001004757 | <i>OR51Q1</i>    | 0.359382099045888 | 0.0368014538845979 | 2.00E-04 | 1 | 9.00E-04 | 0 | NA | NA |
| NM_001105572 | <i>PLA2G2C</i>   | 0.322126306224443 | 0                  | 2.00E-04 | 1 | 9.00E-04 | 0 | NA | NA |
| NM_001159353 | <i>REG4</i>      | 0.322126306224443 | 0                  | 2.00E-04 | 1 | 9.00E-04 | 0 | NA | NA |
| NM_001159352 | <i>REG4</i>      | 0.322126306224443 | 0                  | 2.00E-04 | 1 | 9.00E-04 | 0 | NA | NA |
| NM_032044    | <i>REG4</i>      | 0.322126306224443 | 0                  | 2.00E-04 | 1 | 9.00E-04 | 0 | NA | NA |
| NM_001197223 | <i>PDE4D</i>     | 0.322126306224443 | 0                  | 2.00E-04 | 1 | 9.00E-04 | 0 | NA | NA |
| NM_001267594 | <i>SENP1</i>     | 0.321671967287597 | 0                  | 2.00E-04 | 1 | 9.00E-04 | 0 | NA | NA |
| NR_028102    | <i>THUMPD2</i>   | 0.321671967287597 | 0                  | 2.00E-04 | 1 | 9.00E-04 | 0 | NA | NA |
| NM_025264    | <i>THUMPD2</i>   | 0.321671967287597 | 0                  | 2.00E-04 | 1 | 9.00E-04 | 0 | NA | NA |
| NM_206996    | <i>SPAG17</i>    | 0.32121762835075  | 0                  | 2.00E-04 | 1 | 9.00E-04 | 0 | NA | NA |
| NM_001004298 | <i>C10orf90</i>  | 0.32121762835075  | 0                  | 2.00E-04 | 1 | 9.00E-04 | 0 | NA | NA |
| NM_002072    | <i>GNAQ</i>      | 0.32121762835075  | 0                  | 2.00E-04 | 1 | 9.00E-04 | 0 | NA | NA |
| NM_001123387 | <i>KRTAP2-1</i>  | 0.320763289413903 | 0                  | 2.00E-04 | 1 | 9.00E-04 | 0 | NA | NA |
| NM_001040084 | <i>ANXA8</i>     | 0.320308950477056 | 0                  | 2.00E-04 | 1 | 9.00E-04 | 0 | NA | NA |
| NM_001271703 | <i>ANXA8</i>     | 0.320308950477056 | 0                  | 2.00E-04 | 1 | 9.00E-04 | 0 | NA | NA |
| NM_001271702 | <i>ANXA8</i>     | 0.320308950477056 | 0                  | 2.00E-04 | 1 | 9.00E-04 | 0 | NA | NA |
| NM_130436    | <i>DYRK1A</i>    | 0.361653793730123 | 0.0417991821899137 | 2.00E-04 | 1 | 9.00E-04 | 0 | NA | NA |



|              |         |                   |                    |          |        |          |        |    |    |
|--------------|---------|-------------------|--------------------|----------|--------|----------|--------|----|----|
| NM_001029997 | ZNF181  | 0.319854611540209 | 0                  | 0.0244   | 0.9804 | 0.1614   | 0.0017 | NA | NA |
| NM_001145665 | ZNF181  | 0.319854611540209 | 0                  | 0.0232   | 0.9774 | 0.1614   | 0.0016 | NA | NA |
| NM_001098494 | ZNF419  | 0.319854611540209 | 0                  | 2.00E-04 | 1      | 9.00E-04 | 0      | NA | NA |
| NM_001098496 | ZNF419  | 0.319854611540209 | 0                  | 2.00E-04 | 1      | 9.00E-04 | 0      | NA | NA |
| NM_001098495 | ZNF419  | 0.319854611540209 | 0                  | 2.00E-04 | 1      | 9.00E-04 | 0      | NA | NA |
| NM_001098491 | ZNF419  | 0.319854611540209 | 0                  | 2.00E-04 | 1      | 9.00E-04 | 0      | NA | NA |
| NM_001098493 | ZNF419  | 0.319854611540209 | 0                  | 2.00E-04 | 1      | 9.00E-04 | 0      | NA | NA |
| NM_001098492 | ZNF419  | 0.319854611540209 | 0                  | 2.00E-04 | 1      | 9.00E-04 | 0      | NA | NA |
| NM_024691    | ZNF419  | 0.319854611540209 | 0                  | 2.00E-04 | 1      | 9.00E-04 | 0      | NA | NA |
| NM_001146726 | TIMD4   | 0.319854611540209 | 0                  | 2.00E-04 | 1      | 9.00E-04 | 0      | NA | NA |
| NM_138379    | TIMD4   | 0.319854611540209 | 0                  | 2.00E-04 | 1      | 9.00E-04 | 0      | NA | NA |
| NM_012192    | TIMM10B | 0.349386642435257 | 0.0299863698318946 | 2.00E-04 | 1      | 9.00E-04 | 0      | NA | NA |
| NM_021233    | DNASE2B | 0.319400272603362 | 0                  | 2.00E-04 | 1      | 9.00E-04 | 0      | NA | NA |
| NM_170662    | CBLB    | 0.319400272603362 | 0                  | 2.00E-04 | 1      | 9.00E-04 | 0      | NA | NA |
| NR_002440    | SNORD16 | 0.318945933666515 | 0                  | 2.00E-04 | 1      | 9.00E-04 | 0      | NA | NA |
| NM_016570    | ERGIC2  | 0.318037255792821 | 0                  | 2.00E-04 | 1      | 9.00E-04 | 0      | NA | NA |
| NM_006205    | PDE6H   | 0.317582916855975 | 0                  | 2.00E-04 | 1      | 9.00E-04 | 0      | NA | NA |
| NM_004361    | CDH7    | 0.317582916855975 | 0                  | 2.00E-04 | 1      | 9.00E-04 | 0      | NA | NA |
| NM_033646    | CDH7    | 0.317582916855975 | 0                  | 2.00E-04 | 1      | 9.00E-04 | 0      | NA | NA |
| NM_001005282 | OR5M8   | 0.317582916855975 | 0                  | 2.00E-04 | 1      | 9.00E-04 | 0      | NA | NA |
| NM_001828    | CLC     | 0.317582916855975 | 0                  | 2.00E-04 | 1      | 9.00E-04 | 0      | NA | NA |
| NM_001031723 | DNAJB14 | 0.317582916855975 | 0                  | 2.00E-04 | 1      | 9.00E-04 | 0      | NA | NA |
| NM_001278310 | DNAJB14 | 0.317582916855975 | 0                  | 2.00E-04 | 1      | 9.00E-04 | 0      | NA | NA |
| NM_001278311 | DNAJB14 | 0.317582916855975 | 0                  | 2.00E-04 | 1      | 9.00E-04 | 0      | NA | NA |
| NM_001159495 | BANF2   | 0.317128577919128 | 0                  | 2.00E-04 | 1      | 9.00E-04 | 0      | NA | NA |
| NM_001038640 | GOLGA6A | 0.317128577919128 | 0                  | 2.00E-04 | 1      | 9.00E-04 | 0      | NA | NA |
| NM_014487    | ZNF330  | 0.316674238982281 | 0                  | 2.00E-04 | 1      | 9.00E-04 | 0      | NA | NA |
| NM_001113561 | RNF180  | 0.316674238982281 | 0                  | 2.00E-04 | 1      | 9.00E-04 | 0      | NA | NA |
| NM_178532    | RNF180  | 0.316674238982281 | 0                  | 2.00E-04 | 1      | 9.00E-04 | 0      | NA | NA |
| NM_031430    | RILP    | 0.316674238982281 | 0                  | 2.00E-04 | 1      | 9.00E-04 | 0      | NA | NA |
| NM_022368    | PJA1    | 0.316674238982281 | 0                  | 2.00E-04 | 1      | 9.00E-04 | 0      | NA | NA |
| NM_001032396 | PJA1    | 0.316674238982281 | 0                  | 2.00E-04 | 1      | 9.00E-04 | 0      | NA | NA |
| NM_145119    | PJA1    | 0.316674238982281 | 0                  | 2.00E-04 | 1      | 9.00E-04 | 0      | NA | NA |
| NM_002449    | MSX2    | 0.316219900045434 | 0                  | 2.00E-04 | 1      | 9.00E-04 | 0      | NA | NA |
| NM_005593    | MYF5    | 0.336665152203544 | 0.0208995910949568 | 2.00E-04 | 1      | 9.00E-04 | 0      | NA | NA |
| NM_022896    | LPIN3   | 0.315765561108587 | 0                  | 2.00E-04 | 1      | 9.00E-04 | 0      | NA | NA |
| NM_024870    | PREX2   | 0.314402544298046 | 0                  | 2.00E-04 | 1      | 9.00E-04 | 0      | NA | NA |
| NM_025170    | PREX2   | 0.314402544298046 | 0                  | 2.00E-04 | 1      | 9.00E-04 | 0      | NA | NA |
| NM_004960    | FUS     | 0.313948205361199 | 0                  | 2.00E-04 | 1      | 9.00E-04 | 0      | NA | NA |
| NM_001170937 | FUS     | 0.313948205361199 | 0                  | 2.00E-04 | 1      | 9.00E-04 | 0      | NA | NA |
| NM_001170634 | FUS     | 0.313948205361199 | 0                  | 2.00E-04 | 1      | 9.00E-04 | 0      | NA | NA |

|              |         |                   |                   |          |        |          |   |    |    |
|--------------|---------|-------------------|-------------------|----------|--------|----------|---|----|----|
| NR_028388    | FUS     | 0.313948205361199 | 0                 | 2.00E-04 | 1      | 9.00E-04 | 0 | NA | NA |
| NM_003221    | TFAP2B  | 0.313948205361199 | 0                 | 2.00E-04 | 1      | 9.00E-04 | 0 | NA | NA |
| NM_001270585 | IQCA1   | 0.313948205361199 | 0                 | 2.00E-04 | 1      | 9.00E-04 | 0 | NA | NA |
| NM_030959    | OR12D3  | 0.313948205361199 | 0                 | 2.00E-04 | 1      | 9.00E-04 | 0 | NA | NA |
| NM_001243266 | MS4A4A  | 0.313493866424353 | 0                 | 2.00E-04 | 1      | 9.00E-04 | 0 | NA | NA |
| NM_148975    | MS4A4A  | 0.313493866424353 | 0                 | 2.00E-04 | 1      | 9.00E-04 | 0 | NA | NA |
| NM_024021    | MS4A4A  | 0.313493866424353 | 0                 | 2.00E-04 | 1      | 9.00E-04 | 0 | NA | NA |
| NM_001256030 | CD48    | 0.313493866424353 | 0                 | 2.00E-04 | 1      | 9.00E-04 | 0 | NA | NA |
| NM_001778    | CD48    | 0.313493866424353 | 0                 | 2.00E-04 | 1      | 9.00E-04 | 0 | NA | NA |
| NM_001206741 | HSD11B1 | 0.312585188550659 | 0                 | 2.00E-04 | 1      | 9.00E-04 | 0 | NA | NA |
| NM_181755    | HSD11B1 | 0.312585188550659 | 0                 | 2.00E-04 | 1      | 9.00E-04 | 0 | NA | NA |
| NM_001122634 | CPS1    | 0.312585188550659 | 0                 | 2.00E-04 | 1      | 9.00E-04 | 0 | NA | NA |
| NM_004528    | MGST3   | 0.312130849613812 | 0                 | 2.00E-04 | 1      | 9.00E-04 | 0 | NA | NA |
| NM_001198943 | DTNA    | 0.312130849613812 | 0                 | 2.00E-04 | 1      | 9.00E-04 | 0 | NA | NA |
| NM_005140    | CNGA2   | 0.312130849613812 | 0                 | 2.00E-04 | 1      | 9.00E-04 | 0 | NA | NA |
| NM_023039    | ANKRA2  | 0.312130849613812 | 0                 | 2.00E-04 | 1      | 9.00E-04 | 0 | NA | NA |
| NM_001005326 | OR4F6   | 0.311676510676965 | 0                 | 2.00E-04 | 1      | 9.00E-04 | 0 | NA | NA |
| NM_001040143 | SCN2A   | 0.311676510676965 | 0                 | 2.00E-04 | 1      | 9.00E-04 | 0 | NA | NA |
| NR_029663    | MIR15B  | 0.415720127214902 | 0.104043616537937 | 2.00E-04 | 1      | 9.00E-04 | 0 | NA | NA |
| NR_029525    | MIR16-2 | 0.415720127214902 | 0.104043616537937 | 2.00E-04 | 1      | 9.00E-04 | 0 | NA | NA |
| NM_001130834 | LDB2    | 0.311676510676965 | 0                 | 4.00E-04 | 1      | 0.0012   | 0 | NA | NA |
| NM_001290    | LDB2    | 0.311676510676965 | 0                 | 2.00E-04 | 0.9998 | 9.00E-04 | 0 | NA | NA |
| NM_001166281 | MUSK    | 0.311222171740118 | 0                 | 2.00E-04 | 1      | 9.00E-04 | 0 | NA | NA |
| NM_001166280 | MUSK    | 0.311222171740118 | 0                 | 2.00E-04 | 1      | 9.00E-04 | 0 | NA | NA |
| NM_005592    | MUSK    | 0.311222171740118 | 0                 | 2.00E-04 | 1      | 9.00E-04 | 0 | NA | NA |
| NM_005454    | CER1    | 0.311222171740118 | 0                 | 2.00E-04 | 1      | 9.00E-04 | 0 | NA | NA |
| NM_014832    | TBC1D4  | 0.310767832803271 | 0                 | 4.00E-04 | 1      | 0.0012   | 0 | NA | NA |
| NM_001278224 | FGGY    | 0.310313493866424 | 0                 | 2.00E-04 | 1      | 9.00E-04 | 0 | NA | NA |
| NM_002581    | PAPPA   | 0.310313493866424 | 0                 | 2.00E-04 | 1      | 9.00E-04 | 0 | NA | NA |
| NM_001142483 | NREP    | 0.309859154929577 | 0                 | 2.00E-04 | 1      | 9.00E-04 | 0 | NA | NA |
| NM_003901    | SGPL1   | 0.309404815992731 | 0                 | 2.00E-04 | 1      | 9.00E-04 | 0 | NA | NA |
| NM_004267    | CHST2   | 0.309404815992731 | 0                 | 2.00E-04 | 1      | 9.00E-04 | 0 | NA | NA |
| NM_004885    | NPFFR2  | 0.309404815992731 | 0                 | 2.00E-04 | 1      | 9.00E-04 | 0 | NA | NA |
| NM_001242648 | PHACTR1 | 0.309404815992731 | 0                 | 2.00E-04 | 1      | 9.00E-04 | 0 | NA | NA |
| NM_030948    | PHACTR1 | 0.309404815992731 | 0                 | 2.00E-04 | 1      | 9.00E-04 | 0 | NA | NA |
| NM_002995    | XCL1    | 0.308950477055884 | 0                 | 2.00E-04 | 1      | 9.00E-04 | 0 | NA | NA |
| NM_000346    | SOX9    | 0.308950477055884 | 0                 | 2.00E-04 | 1      | 9.00E-04 | 0 | NA | NA |
| NM_004665    | VNN2    | 0.308496138119037 | 0                 | 2.00E-04 | 1      | 9.00E-04 | 0 | NA | NA |
| NM_000290    | PGAM2   | 0.307587460245343 | 0                 | 2.00E-04 | 1      | 9.00E-04 | 0 | NA | NA |
| NM_001080463 | DYNC2H1 | 0.307133121308496 | 0                 | 2.00E-04 | 1      | 9.00E-04 | 0 | NA | NA |
| NM_001377    | DYNC2H1 | 0.307133121308496 | 0                 | 2.00E-04 | 1      | 9.00E-04 | 0 | NA | NA |

|              |              |                    |                   |          |          |          |    |          |    |
|--------------|--------------|--------------------|-------------------|----------|----------|----------|----|----------|----|
| NR_026575    | GK3P         | 0.307133121308496  | 0                 | 2.00E-04 | 1        | 9.00E-04 | 0  | NA       | NA |
| NM_001001343 | FNDC9        | 0.307133121308496  | 0                 | 2.00E-04 | 1        | 9.00E-04 | 0  | NA       | NA |
| NR_002930    | PTPRVP       | 0.306678782371649  | 0                 | 2.00E-04 | 1        | 9.00E-04 | 0  | NA       | NA |
| NM_001254    | CDC6         | 0.306678782371649  | 0                 | 2.00E-04 | 1        | 9.00E-04 | 0  | NA       | NA |
| NM_022484    | TMEM168      | 0.306678782371649  | 0                 | 2.00E-04 | 1        | 9.00E-04 | 0  | NA       | NA |
| NM_001004744 | OR5R1        | 0.306224443434802  | 0                 | 2.00E-04 | 1        | 9.00E-04 | 0  | NA       | NA |
| NM_014482    | BMP10        | 0.306224443434802  | 0                 | 2.00E-04 | 1        | 9.00E-04 | 0  | NA       | NA |
| NM_001145659 | CTAGE9       | 0.306224443434802  | 0                 | 2.00E-04 | 1        | 9.00E-04 | 0  | NA       | NA |
| NM_001015001 | CKMT1A       | 0.305315765561109  | 0                 | 2.00E-04 | 1        | 9.00E-04 | 0  | NA       | NA |
| NM_012190    | ALDH1L1      | 0.304861426624262  | 0                 | 2.00E-04 | 1        | 9.00E-04 | 0  | NA       | NA |
| NM_001270364 | ALDH1L1      | 0.304861426624262  | 0                 | 2.00E-04 | 1        | 9.00E-04 | 0  | NA       | NA |
| NM_001270365 | ALDH1L1      | 0.304861426624262  | 0                 | 2.00E-04 | 1        | 9.00E-04 | 0  | NA       | NA |
| NR_072979    | ALDH1L1      | 0.304861426624262  | 0                 | 2.00E-04 | 1        | 9.00E-04 | 0  | NA       | NA |
| NM_000231    | SGCG         | 0.304407087687415  | 0                 | 2.00E-04 | 1        | 9.00E-04 | 0  | NA       | NA |
| NM_013266    | CTNNA3       | 0.304407087687415  | 0                 | 2.00E-04 | 1        | 9.00E-04 | 0  | NA       | NA |
| NM_001199742 | GADD45A      | 0.303498409813721  | 0                 | 2.00E-04 | 1        | 9.00E-04 | 0  | NA       | NA |
| NM_001199741 | GADD45A      | 0.303498409813721  | 0                 | 2.00E-04 | 1        | 9.00E-04 | 0  | NA       | NA |
| NM_001924    | GADD45A      | 0.303498409813721  | 0                 | 2.00E-04 | 1        | 9.00E-04 | 0  | NA       | NA |
| NR_002604    | SNORD10      | 0.303498409813721  | 0                 | 2.00E-04 | 1        | 9.00E-04 | 0  | NA       | NA |
| NM_000891    | KCNJ2        | 0.303044070876874  | 0                 | 2.00E-04 | 1        | 9.00E-04 | 0  | NA       | NA |
| NM_019602    | BTNL2        | 0.303044070876874  | 0                 | 2.00E-04 | 1        | 9.00E-04 | 0  | NA       | NA |
| NM_053036    | NPFFR2       | 0.30213539300318   | 0                 | 2.00E-04 | 1        | 9.00E-04 | 0  | NA       | NA |
| NM_001144756 | NPFFR2       | 0.30213539300318   | 0                 | 2.00E-04 | 1        | 9.00E-04 | 0  | NA       | NA |
| NM_002769    | PRSS1        | 0.30213539300318   | 0                 | 2.00E-04 | 1        | 9.00E-04 | 0  | NA       | NA |
| NR_033809    | CYP3A5       | 0.30213539300318   | 0                 | 2.00E-04 | 1        | 9.00E-04 | 0  | NA       | NA |
| NR_033808    | CYP3A5       | 0.30213539300318   | 0                 | 2.00E-04 | 1        | 9.00E-04 | 0  | NA       | NA |
| NR_033807    | CYP3A5       | 0.30213539300318   | 0                 | 2.00E-04 | 1        | 9.00E-04 | 0  | NA       | NA |
| NM_000777    | CYP3A5       | 0.30213539300318   | 0                 | 2.00E-04 | 1        | 9.00E-04 | 0  | NA       | NA |
| NM_001190484 | CYP3A5       | 0.30213539300318   | 0                 | 2.00E-04 | 1        | 9.00E-04 | 0  | NA       | NA |
| NR_033811    | CYP3A5       | 0.30213539300318   | 0                 | 2.00E-04 | 1        | 9.00E-04 | 0  | NA       | NA |
| NR_033810    | CYP3A5       | 0.30213539300318   | 0                 | 2.00E-04 | 1        | 9.00E-04 | 0  | NA       | NA |
| NR_033812    | CYP3A5       | 0.30213539300318   | 0                 | 2.00E-04 | 1        | 9.00E-04 | 0  | NA       | NA |
| NM_004662    | DNAH9        | 0.301681054066333  | 0                 | 2.00E-04 | 1        | 9.00E-04 | 0  | NA       | NA |
| NR_028119    | LOC100133957 | 0.300318037255793  | 0                 | 2.00E-04 | 1        | 9.00E-04 | 0  | NA       | NA |
| NR_027444    | LOC100133957 | 0.300318037255793  | 0                 | 2.00E-04 | 1        | 9.00E-04 | 0  | NA       | NA |
| NM_005486    | TOM1L1       | 0                  | 0.300318037255793 | 1        | 2.00E-04 | NA       | NA | 6.00E-04 | 0  |
| NR_073589    | SLC1A6       | 0                  | 0.300318037255793 | 1        | 2.00E-04 | NA       | NA | 6.00E-04 | 0  |
| NM_014247    | RAPGEF2      | 0.0463425715583826 | 0.347114947751022 | 1        | 2.00E-04 | NA       | NA | 6.00E-04 | 0  |
| NM_004819    | SYMPK        | 0                  | 0.30077237619264  | 1        | 2.00E-04 | NA       | NA | 6.00E-04 | 0  |
| NM_147184    | TP53I3       | 0                  | 0.30077237619264  | 1        | 2.00E-04 | NA       | NA | 6.00E-04 | 0  |
| NM_004881    | TP53I3       | 0                  | 0.30077237619264  | 1        | 2.00E-04 | NA       | NA | 6.00E-04 | 0  |

|              |                  |                    |                   |   |          |    |    |          |          |
|--------------|------------------|--------------------|-------------------|---|----------|----|----|----------|----------|
| NM_020395    | <i>INTS12</i>    | 0                  | 0.30077237619264  | 1 | 2.00E-04 | NA | NA | 6.00E-04 | 0        |
| NM_001142471 | <i>INTS12</i>    | 0                  | 0.30077237619264  | 1 | 2.00E-04 | NA | NA | 6.00E-04 | 0        |
| NM_024107    | <i>TMUB2</i>     | 0                  | 0.301226715129487 | 1 | 0.0018   | NA | NA | 0.0141   | 1.00E-04 |
| NM_001076674 | <i>TMUB2</i>     | 0                  | 0.301226715129487 | 1 | 6.00E-04 | NA | NA | 0.0029   | 0        |
| NM_177441    | <i>TMUB2</i>     | 0                  | 0.301226715129487 | 1 | 0.0018   | NA | NA | 0.0141   | 1.00E-04 |
| NM_001243975 | <i>PPP3CC</i>    | 0                  | 0.301226715129487 | 1 | 2.00E-04 | NA | NA | 6.00E-04 | 0        |
| NM_001243974 | <i>PPP3CC</i>    | 0                  | 0.301226715129487 | 1 | 2.00E-04 | NA | NA | 6.00E-04 | 0        |
| NM_005605    | <i>PPP3CC</i>    | 0                  | 0.301226715129487 | 1 | 2.00E-04 | NA | NA | 6.00E-04 | 0        |
| NM_030640    | <i>DUSP16</i>    | 0                  | 0.301226715129487 | 1 | 2.00E-04 | NA | NA | 6.00E-04 | 0        |
| NM_182575    | <i>IZUMO1</i>    | 0                  | 0.301226715129487 | 1 | 2.00E-04 | NA | NA | 6.00E-04 | 0        |
| NR_047549    | <i>SLC25A12</i>  | 0                  | 0.301226715129487 | 1 | 6.00E-04 | NA | NA | 0.0029   | 0        |
| NM_003705    | <i>SLC25A12</i>  | 0                  | 0.301226715129487 | 1 | 4.00E-04 | NA | NA | 0.001    | 0        |
| NR_038273    | <i>LINC00933</i> | 0                  | 0.301681054066333 | 1 | 2.00E-04 | NA | NA | 6.00E-04 | 0        |
| NM_173482    | <i>CCDC105</i>   | 0                  | 0.301681054066333 | 1 | 2.00E-04 | NA | NA | 6.00E-04 | 0        |
| NM_001199583 | <i>PACSN1</i>    | 0                  | 0.301681054066333 | 1 | 2.00E-04 | NA | NA | 6.00E-04 | 0        |
| NM_152587    | <i>C11orf65</i>  | 0                  | 0.301681054066333 | 1 | 2.00E-04 | NA | NA | 6.00E-04 | 0        |
| NM_001256214 | <i>ATP1A3</i>    | 0                  | 0.301681054066333 | 1 | 2.00E-04 | NA | NA | 6.00E-04 | 0        |
| NM_152296    | <i>ATP1A3</i>    | 0                  | 0.301681054066333 | 1 | 2.00E-04 | NA | NA | 6.00E-04 | 0        |
| NM_000491    | <i>C1QB</i>      | 0                  | 0.30213539300318  | 1 | 2.00E-04 | NA | NA | 6.00E-04 | 0        |
| NM_016553    | <i>NUP62</i>     | 0                  | 0.30213539300318  | 1 | 2.00E-04 | NA | NA | 6.00E-04 | 0        |
| NM_012346    | <i>NUP62</i>     | 0                  | 0.30213539300318  | 1 | 2.00E-04 | NA | NA | 6.00E-04 | 0        |
| NM_153719    | <i>NUP62</i>     | 0                  | 0.30213539300318  | 1 | 2.00E-04 | NA | NA | 6.00E-04 | 0        |
| NM_001193357 | <i>NUP62</i>     | 0                  | 0.30213539300318  | 1 | 2.00E-04 | NA | NA | 6.00E-04 | 0        |
| NM_172374    | <i>IL4I1</i>     | 0                  | 0.30213539300318  | 1 | 2.00E-04 | NA | NA | 6.00E-04 | 0        |
| NM_001258018 | <i>IL4I1</i>     | 0                  | 0.30213539300318  | 1 | 4.00E-04 | NA | NA | 0.001    | 0        |
| NM_001258017 | <i>IL4I1</i>     | 0                  | 0.30213539300318  | 1 | 2.00E-04 | NA | NA | 6.00E-04 | 0        |
| NM_153718    | <i>NUP62</i>     | 0                  | 0.30213539300318  | 1 | 2.00E-04 | NA | NA | 6.00E-04 | 0        |
| NR_047577    | <i>IL4I1</i>     | 0                  | 0.30213539300318  | 1 | 2.00E-04 | NA | NA | 6.00E-04 | 0        |
| NM_006168    | <i>NKX6-1</i>    | 0                  | 0.30213539300318  | 1 | 2.00E-04 | NA | NA | 6.00E-04 | 0        |
| NR_024388    | <i>NCBP2-AS2</i> | 0                  | 0.302589731940027 | 1 | 2.00E-04 | NA | NA | 6.00E-04 | 0        |
| NM_001008391 | <i>CCDC73</i>    | 0                  | 0.302589731940027 | 1 | 2.00E-04 | NA | NA | 6.00E-04 | 0        |
| NM_153448    | <i>ESX1</i>      | 0.0431621990004543 | 0.345751930940482 | 1 | 2.00E-04 | NA | NA | 6.00E-04 | 0        |
| NM_153046    | <i>TDRD9</i>     | 0                  | 0.303044070876874 | 1 | 2.00E-04 | NA | NA | 6.00E-04 | 0        |
| NM_145061    | <i>SKA3</i>      | 0                  | 0.303498409813721 | 1 | 2.00E-04 | NA | NA | 6.00E-04 | 0        |
| NM_001166017 | <i>SKA3</i>      | 0                  | 0.303498409813721 | 1 | 2.00E-04 | NA | NA | 6.00E-04 | 0        |
| NM_001185010 | <i>RNF4</i>      | 0                  | 0.303952748750568 | 1 | 2.00E-04 | NA | NA | 6.00E-04 | 0        |
| NM_002938    | <i>RNF4</i>      | 0                  | 0.303952748750568 | 1 | 2.00E-04 | NA | NA | 6.00E-04 | 0        |
| NM_001185009 | <i>RNF4</i>      | 0                  | 0.303952748750568 | 1 | 2.00E-04 | NA | NA | 6.00E-04 | 0        |
| NM_014706    | <i>SART3</i>     | 0                  | 0.303952748750568 | 1 | 2.00E-04 | NA | NA | 6.00E-04 | 0        |
| NM_001130099 | <i>KIFC3</i>     | 0                  | 0.303952748750568 | 1 | 2.00E-04 | NA | NA | 6.00E-04 | 0        |
| NM_020770    | <i>CGN</i>       | 0                  | 0.304407087687415 | 1 | 2.00E-04 | NA | NA | 6.00E-04 | 0        |

|              |            |                    |                   |        |          |    |    |          |   |
|--------------|------------|--------------------|-------------------|--------|----------|----|----|----------|---|
| NM_001039479 | AREL1      | 0                  | 0.304407087687415 | 1      | 2.00E-04 | NA | NA | 6.00E-04 | 0 |
| NM_004155    | SERPINB9   | 0                  | 0.304407087687415 | 1      | 2.00E-04 | NA | NA | 6.00E-04 | 0 |
| NR_024120    | DBIL5P     | 0                  | 0.304861426624262 | 1      | 2.00E-04 | NA | NA | 6.00E-04 | 0 |
| NR_026962    | TTC28-AS1  | 0                  | 0.304861426624262 | 1      | 2.00E-04 | NA | NA | 6.00E-04 | 0 |
| NR_026963    | TTC28-AS1  | 0                  | 0.304861426624262 | 1      | 2.00E-04 | NA | NA | 6.00E-04 | 0 |
| NM_145305    | SLC25A43   | 0                  | 0.304861426624262 | 1      | 2.00E-04 | NA | NA | 6.00E-04 | 0 |
| NM_014801    | PCNXL2     | 0                  | 0.304861426624262 | 1      | 2.00E-04 | NA | NA | 6.00E-04 | 0 |
| NM_206824    | VKORC1     | 0                  | 0.304861426624262 | 1      | 2.00E-04 | NA | NA | 6.00E-04 | 0 |
| NM_024006    | VKORC1     | 0                  | 0.304861426624262 | 1      | 2.00E-04 | NA | NA | 6.00E-04 | 0 |
| NR_030766    | GUSBP10    | 0                  | 0.304861426624262 | 1      | 6.00E-04 | NA | NA | 0.0029   | 0 |
| NM_020196    | XAB2       | 0                  | 0.305315765561109 | 1      | 2.00E-04 | NA | NA | 6.00E-04 | 0 |
| NM_023924    | BRD9       | 0                  | 0.305315765561109 | 1      | 2.00E-04 | NA | NA | 6.00E-04 | 0 |
| NM_001009877 | BRD9       | 0                  | 0.305315765561109 | 1      | 2.00E-04 | NA | NA | 6.00E-04 | 0 |
| NR_027633    | BRD9       | 0                  | 0.305315765561109 | 1      | 2.00E-04 | NA | NA | 6.00E-04 | 0 |
| NR_024490    | GABPB1-AS1 | 0                  | 0.305770104497955 | 1      | 2.00E-04 | NA | NA | 6.00E-04 | 0 |
| NM_014906    | PPM1E      | 0                  | 0.305770104497955 | 1      | 2.00E-04 | NA | NA | 6.00E-04 | 0 |
| NR_048561    | PPM1E      | 0                  | 0.305770104497955 | 1      | 2.00E-04 | NA | NA | 6.00E-04 | 0 |
| NM_001146009 | SLCO5A1    | 0                  | 0.305770104497955 | 1      | 2.00E-04 | NA | NA | 6.00E-04 | 0 |
| NM_001130842 | ZNF286A    | 0                  | 0.306224443434802 | 1      | 2.00E-04 | NA | NA | 6.00E-04 | 0 |
| NM_020652    | ZNF286A    | 0                  | 0.306224443434802 | 1      | 2.00E-04 | NA | NA | 6.00E-04 | 0 |
| NM_001040662 | METTL21D   | 0                  | 0.306678782371649 | 1      | 2.00E-04 | NA | NA | 6.00E-04 | 0 |
| NM_024558    | METTL21D   | 0                  | 0.306678782371649 | 1      | 2.00E-04 | NA | NA | 6.00E-04 | 0 |
| NR_049739    | METTL21D   | 0                  | 0.306678782371649 | 1      | 2.00E-04 | NA | NA | 6.00E-04 | 0 |
| NR_049738    | METTL21D   | 0                  | 0.306678782371649 | 1      | 2.00E-04 | NA | NA | 6.00E-04 | 0 |
| NM_006519    | DYNLT1     | 0.0572467060427079 | 0.363925488414357 | 1      | 4.00E-04 | NA | NA | 0.001    | 0 |
| NM_030627    | CPEB4      | 0                  | 0.307133121308496 | 1      | 2.00E-04 | NA | NA | 6.00E-04 | 0 |
| NM_016485    | VTA1       | 0                  | 0.307133121308496 | 1      | 2.00E-04 | NA | NA | 6.00E-04 | 0 |
| NR_024061    | LOH12CR2   | 0                  | 0.307133121308496 | 1      | 2.00E-04 | NA | NA | 6.00E-04 | 0 |
| NM_001029870 | SOWAHB     | 0                  | 0.307133121308496 | 0.9996 | 4.00E-04 | NA | NA | 0.001    | 0 |
| NM_001164586 | IGFN1      | 0                  | 0.30804179918219  | 1      | 2.00E-04 | NA | NA | 6.00E-04 | 0 |
| NM_001042384 | CEP63      | 0                  | 0.30804179918219  | 1      | 2.00E-04 | NA | NA | 6.00E-04 | 0 |
| NM_001042383 | CEP63      | 0                  | 0.30804179918219  | 1      | 2.00E-04 | NA | NA | 6.00E-04 | 0 |
| NM_024537    | CARS2      | 0                  | 0.30804179918219  | 1      | 2.00E-04 | NA | NA | 6.00E-04 | 0 |
| NM_001077690 | ALG9       | 0                  | 0.308496138119037 | 1      | 2.00E-04 | NA | NA | 6.00E-04 | 0 |
| NM_024740    | ALG9       | 0                  | 0.308496138119037 | 1      | 2.00E-04 | NA | NA | 6.00E-04 | 0 |
| NM_005323    | HIST1H1T   | 0                  | 0.308496138119037 | 1      | 2.00E-04 | NA | NA | 6.00E-04 | 0 |
| NM_020531    | APMAP      | 0                  | 0.308950477055884 | 1      | 2.00E-04 | NA | NA | 6.00E-04 | 0 |
| NR_026908    | AQP4-AS1   | 0                  | 0.309404815992731 | 1      | 2.00E-04 | NA | NA | 6.00E-04 | 0 |
| NM_001013257 | BCAM       | 0                  | 0.309404815992731 | 1      | 2.00E-04 | NA | NA | 6.00E-04 | 0 |
| NM_005581    | BCAM       | 0                  | 0.309404815992731 | 1      | 2.00E-04 | NA | NA | 6.00E-04 | 0 |
| NM_004932    | CDH6       | 0                  | 0.309404815992731 | 1      | 2.00E-04 | NA | NA | 6.00E-04 | 0 |

|              |                 |   |                   |   |          |    |    |          |   |
|--------------|-----------------|---|-------------------|---|----------|----|----|----------|---|
| NM_000358    | <i>TGFBI</i>    | 0 | 0.309404815992731 | 1 | 2.00E-04 | NA | NA | 6.00E-04 | 0 |
| NM_001282385 | <i>CSNK2B</i>   | 0 | 0.309404815992731 | 1 | 2.00E-04 | NA | NA | 6.00E-04 | 0 |
| NM_001320    | <i>CSNK2B</i>   | 0 | 0.309404815992731 | 1 | 2.00E-04 | NA | NA | 6.00E-04 | 0 |
| NM_019090    | <i>MAP10</i>    | 0 | 0.309859154929577 | 1 | 2.00E-04 | NA | NA | 6.00E-04 | 0 |
| NM_001098638 | <i>RNF169</i>   | 0 | 0.309859154929577 | 1 | 2.00E-04 | NA | NA | 6.00E-04 | 0 |
| NM_001039762 | <i>FAM196A</i>  | 0 | 0.309859154929577 | 1 | 2.00E-04 | NA | NA | 6.00E-04 | 0 |
| NM_001127365 | <i>FAM221A</i>  | 0 | 0.310767832803271 | 1 | 2.00E-04 | NA | NA | 6.00E-04 | 0 |
| NM_001127364 | <i>FAM221A</i>  | 0 | 0.310767832803271 | 1 | 2.00E-04 | NA | NA | 6.00E-04 | 0 |
| NM_199136    | <i>FAM221A</i>  | 0 | 0.310767832803271 | 1 | 2.00E-04 | NA | NA | 6.00E-04 | 0 |
| NM_001243736 | <i>LAMTOR3</i>  | 0 | 0.310767832803271 | 1 | 2.00E-04 | NA | NA | 6.00E-04 | 0 |
| NM_021970    | <i>LAMTOR3</i>  | 0 | 0.310767832803271 | 1 | 2.00E-04 | NA | NA | 6.00E-04 | 0 |
| NR_024170    | <i>LAMTOR3</i>  | 0 | 0.310767832803271 | 1 | 2.00E-04 | NA | NA | 6.00E-04 | 0 |
| NM_014494    | <i>TNRC6A</i>   | 0 | 0.311222171740118 | 1 | 2.00E-04 | NA | NA | 6.00E-04 | 0 |
| NM_000738    | <i>CHRM1</i>    | 0 | 0.311676510676965 | 1 | 2.00E-04 | NA | NA | 6.00E-04 | 0 |
| NM_007038    | <i>ADAMT55</i>  | 0 | 0.311676510676965 | 1 | 2.00E-04 | NA | NA | 6.00E-04 | 0 |
| NM_005990    | <i>STK10</i>    | 0 | 0.311676510676965 | 1 | 2.00E-04 | NA | NA | 6.00E-04 | 0 |
| NM_001258315 | <i>ECT2</i>     | 0 | 0.312130849613812 | 1 | 2.00E-04 | NA | NA | 6.00E-04 | 0 |
| NM_001258316 | <i>ECT2</i>     | 0 | 0.312130849613812 | 1 | 2.00E-04 | NA | NA | 6.00E-04 | 0 |
| NM_018098    | <i>ECT2</i>     | 0 | 0.312130849613812 | 1 | 2.00E-04 | NA | NA | 6.00E-04 | 0 |
| NM_175610    | <i>TJP1</i>     | 0 | 0.312130849613812 | 1 | 2.00E-04 | NA | NA | 6.00E-04 | 0 |
| NM_003257    | <i>TJP1</i>     | 0 | 0.312130849613812 | 1 | 2.00E-04 | NA | NA | 6.00E-04 | 0 |
| NR_073130    | <i>CDH19</i>    | 0 | 0.312130849613812 | 1 | 2.00E-04 | NA | NA | 6.00E-04 | 0 |
| NM_021153    | <i>CDH19</i>    | 0 | 0.312130849613812 | 1 | 2.00E-04 | NA | NA | 6.00E-04 | 0 |
| NM_001271028 | <i>CDH19</i>    | 0 | 0.312130849613812 | 1 | 2.00E-04 | NA | NA | 6.00E-04 | 0 |
| NM_006233    | <i>POLR2I</i>   | 0 | 0.312130849613812 | 1 | 2.00E-04 | NA | NA | 6.00E-04 | 0 |
| NM_173358    | <i>SSX7</i>     | 0 | 0.312130849613812 | 1 | 2.00E-04 | NA | NA | 6.00E-04 | 0 |
| NR_104260    | <i>PRDM15</i>   | 0 | 0.312585188550659 | 1 | 2.00E-04 | NA | NA | 6.00E-04 | 0 |
| NM_152765    | <i>C8orf46</i>  | 0 | 0.313039527487506 | 1 | 2.00E-04 | NA | NA | 6.00E-04 | 0 |
| NM_003772    | <i>JRKL</i>     | 0 | 0.313948205361199 | 1 | 2.00E-04 | NA | NA | 6.00E-04 | 0 |
| NM_001261833 | <i>JRKL</i>     | 0 | 0.313948205361199 | 1 | 2.00E-04 | NA | NA | 6.00E-04 | 0 |
| NM_001206691 | <i>RFX4</i>     | 0 | 0.313948205361199 | 1 | 2.00E-04 | NA | NA | 6.00E-04 | 0 |
| NM_001173467 | <i>SP7</i>      | 0 | 0.313948205361199 | 1 | 2.00E-04 | NA | NA | 6.00E-04 | 0 |
| NM_018189    | <i>DPPA4</i>    | 0 | 0.313948205361199 | 1 | 2.00E-04 | NA | NA | 6.00E-04 | 0 |
| NM_000362    | <i>TIMP3</i>    | 0 | 0.314402544298046 | 1 | 2.00E-04 | NA | NA | 6.00E-04 | 0 |
| NM_005288    | <i>GPR12</i>    | 0 | 0.314402544298046 | 1 | 2.00E-04 | NA | NA | 6.00E-04 | 0 |
| NR_033981    | <i>FLJ27354</i> | 0 | 0.314856883234893 | 1 | 2.00E-04 | NA | NA | 6.00E-04 | 0 |
| NM_006946    | <i>SPTBN2</i>   | 0 | 0.314856883234893 | 1 | 2.00E-04 | NA | NA | 6.00E-04 | 0 |
| NM_004730    | <i>ETF1</i>     | 0 | 0.314856883234893 | 1 | 2.00E-04 | NA | NA | 6.00E-04 | 0 |
| NM_001256302 | <i>ETF1</i>     | 0 | 0.314856883234893 | 1 | 2.00E-04 | NA | NA | 6.00E-04 | 0 |
| NM_001242776 | <i>TMEM139</i>  | 0 | 0.31531122217174  | 1 | 2.00E-04 | NA | NA | 6.00E-04 | 0 |
| NM_001242777 | <i>TMEM139</i>  | 0 | 0.31531122217174  | 1 | 2.00E-04 | NA | NA | 6.00E-04 | 0 |

|              |              |   |                   |   |          |    |    |          |   |
|--------------|--------------|---|-------------------|---|----------|----|----|----------|---|
| NM_001242773 | TMEM139      | 0 | 0.31531122217174  | 1 | 2.00E-04 | NA | NA | 6.00E-04 | 0 |
| NM_001242774 | TMEM139      | 0 | 0.31531122217174  | 1 | 2.00E-04 | NA | NA | 6.00E-04 | 0 |
| NM_001242775 | TMEM139      | 0 | 0.31531122217174  | 1 | 2.00E-04 | NA | NA | 6.00E-04 | 0 |
| NM_001282877 | TMEM139      | 0 | 0.31531122217174  | 1 | 2.00E-04 | NA | NA | 6.00E-04 | 0 |
| NM_153345    | TMEM139      | 0 | 0.31531122217174  | 1 | 2.00E-04 | NA | NA | 6.00E-04 | 0 |
| NR_104250    | TMEM139      | 0 | 0.31531122217174  | 1 | 2.00E-04 | NA | NA | 6.00E-04 | 0 |
| NR_104251    | TMEM139      | 0 | 0.31531122217174  | 1 | 2.00E-04 | NA | NA | 6.00E-04 | 0 |
| NR_104252    | TMEM139      | 0 | 0.31531122217174  | 1 | 2.00E-04 | NA | NA | 6.00E-04 | 0 |
| NR_104253    | TMEM139      | 0 | 0.31531122217174  | 1 | 2.00E-04 | NA | NA | 6.00E-04 | 0 |
| NR_104254    | TMEM139      | 0 | 0.31531122217174  | 1 | 2.00E-04 | NA | NA | 6.00E-04 | 0 |
| NM_001282876 | TMEM139      | 0 | 0.31531122217174  | 1 | 2.00E-04 | NA | NA | 6.00E-04 | 0 |
| NR_040003    | TMEM139      | 0 | 0.31531122217174  | 1 | 2.00E-04 | NA | NA | 6.00E-04 | 0 |
| NR_049794    | LOC100506834 | 0 | 0.31531122217174  | 1 | 2.00E-04 | NA | NA | 6.00E-04 | 0 |
| NM_000086    | CLN3         | 0 | 0.31531122217174  | 1 | 2.00E-04 | NA | NA | 6.00E-04 | 0 |
| NM_007146    | VEZF1        | 0 | 0.31531122217174  | 1 | 2.00E-04 | NA | NA | 6.00E-04 | 0 |
| NM_001080495 | TNRC18       | 0 | 0.31531122217174  | 1 | 2.00E-04 | NA | NA | 6.00E-04 | 0 |
| NM_000507    | FBP1         | 0 | 0.31531122217174  | 1 | 2.00E-04 | NA | NA | 6.00E-04 | 0 |
| NM_001127628 | FBP1         | 0 | 0.31531122217174  | 1 | 2.00E-04 | NA | NA | 6.00E-04 | 0 |
| NM_015157    | PHLDB1       | 0 | 0.315765561108587 | 1 | 2.00E-04 | NA | NA | 6.00E-04 | 0 |
| NM_001114172 | PIK3R3       | 0 | 0.315765561108587 | 1 | 2.00E-04 | NA | NA | 6.00E-04 | 0 |
| NM_003629    | PIK3R3       | 0 | 0.315765561108587 | 1 | 2.00E-04 | NA | NA | 6.00E-04 | 0 |
| NM_005019    | PDE1A        | 0 | 0.315765561108587 | 1 | 2.00E-04 | NA | NA | 6.00E-04 | 0 |
| NM_001258312 | PDE1A        | 0 | 0.315765561108587 | 1 | 2.00E-04 | NA | NA | 6.00E-04 | 0 |
| NM_001003683 | PDE1A        | 0 | 0.315765561108587 | 1 | 2.00E-04 | NA | NA | 6.00E-04 | 0 |
| NM_002048    | GAS1         | 0 | 0.315765561108587 | 1 | 2.00E-04 | NA | NA | 6.00E-04 | 0 |
| NM_001136140 | CMPK1        | 0 | 0.316219900045434 | 1 | 2.00E-04 | NA | NA | 6.00E-04 | 0 |
| NR_046395    | CMPK1        | 0 | 0.316219900045434 | 1 | 2.00E-04 | NA | NA | 6.00E-04 | 0 |
| NM_016308    | CMPK1        | 0 | 0.316219900045434 | 1 | 2.00E-04 | NA | NA | 6.00E-04 | 0 |
| NR_046394    | CMPK1        | 0 | 0.316219900045434 | 1 | 2.00E-04 | NA | NA | 6.00E-04 | 0 |
| NM_001083314 | CHMP1A       | 0 | 0.316219900045434 | 1 | 2.00E-04 | NA | NA | 6.00E-04 | 0 |
| NM_002768    | CHMP1A       | 0 | 0.316219900045434 | 1 | 2.00E-04 | NA | NA | 6.00E-04 | 0 |
| NR_046418    | CHMP1A       | 0 | 0.316219900045434 | 1 | 2.00E-04 | NA | NA | 6.00E-04 | 0 |
| NM_213589    | RAPH1        | 0 | 0.316219900045434 | 1 | 2.00E-04 | NA | NA | 6.00E-04 | 0 |
| NM_203365    | RAPH1        | 0 | 0.316219900045434 | 1 | 2.00E-04 | NA | NA | 6.00E-04 | 0 |
| NM_006041    | HS3ST3B1     | 0 | 0.317128577919128 | 1 | 2.00E-04 | NA | NA | 6.00E-04 | 0 |
| NM_182490    | ZNF227       | 0 | 0.317128577919128 | 1 | 2.00E-04 | NA | NA | 6.00E-04 | 0 |
| NM_153689    | C2orf69      | 0 | 0.317128577919128 | 1 | 2.00E-04 | NA | NA | 6.00E-04 | 0 |
| NM_002301    | LDHC         | 0 | 0.317582916855975 | 1 | 2.00E-04 | NA | NA | 6.00E-04 | 0 |
| NM_017448    | LDHC         | 0 | 0.317582916855975 | 1 | 2.00E-04 | NA | NA | 6.00E-04 | 0 |
| NM_014855    | AP5Z1        | 0 | 0.317582916855975 | 1 | 2.00E-04 | NA | NA | 6.00E-04 | 0 |
| NM_001242946 | EPDR1        | 0 | 0.318037255792821 | 1 | 2.00E-04 | NA | NA | 6.00E-04 | 0 |

|              |            |                   |                   |        |          |    |        |          |   |
|--------------|------------|-------------------|-------------------|--------|----------|----|--------|----------|---|
| NM_017549    | EPDR1      | 0                 | 0.318037255792821 | 1      | 2.00E-04 | NA | NA     | 6.00E-04 | 0 |
| NM_001164748 | RASSF8     | 0                 | 0.318491594729668 | 1      | 2.00E-04 | NA | NA     | 6.00E-04 | 0 |
| NM_007211    | RASSF8     | 0                 | 0.318491594729668 | 1      | 2.00E-04 | NA | NA     | 6.00E-04 | 0 |
| NM_018902    | PCDHA11    | 0                 | 0.318491594729668 | 1      | 2.00E-04 | NA | NA     | 6.00E-04 | 0 |
| NM_031861    | PCDHA11    | 0                 | 0.318491594729668 | 0.9998 | 6.00E-04 | NA | NA     | 0.0029   | 0 |
| NM_001105528 | CCDC178    | 0                 | 0.318491594729668 | 1      | 2.00E-04 | NA | NA     | 6.00E-04 | 0 |
| NR_038227    | RASSF8-AS1 | 0                 | 0.318945933666515 | 1      | 2.00E-04 | NA | NA     | 6.00E-04 | 0 |
| NM_033126    | PSKH2      | 0                 | 0.318945933666515 | 1      | 2.00E-04 | NA | NA     | 6.00E-04 | 0 |
| NR_004859    | SCAND2P    | 0                 | 0.319400272603362 | 1      | 2.00E-04 | NA | NA     | 6.00E-04 | 0 |
| NR_003654    | SCAND2P    | 0                 | 0.319400272603362 | 1      | 2.00E-04 | NA | NA     | 6.00E-04 | 0 |
| NM_001444    | FABP5      | 0                 | 0.319400272603362 | 1      | 2.00E-04 | NA | NA     | 6.00E-04 | 0 |
| NM_001127321 | CBX5       | 0                 | 0.319400272603362 | 1      | 2.00E-04 | NA | NA     | 6.00E-04 | 0 |
| NM_001243194 | INPP5F     | 0                 | 0.319854611540209 | 1      | 2.00E-04 | NA | NA     | 6.00E-04 | 0 |
| NM_181794    | PKIB       | 0                 | 0.319854611540209 | 1      | 2.00E-04 | NA | NA     | 6.00E-04 | 0 |
| NM_001270394 | PKIB       | 0                 | 0.319854611540209 | 1      | 2.00E-04 | NA | NA     | 6.00E-04 | 0 |
| NM_001270393 | PKIB       | 0                 | 0.319854611540209 | 1      | 2.00E-04 | NA | NA     | 6.00E-04 | 0 |
| NM_001009566 | CLSTN1     | 0                 | 0.319854611540209 | 1      | 4.00E-04 | NA | NA     | 0.001    | 0 |
| NM_014944    | CLSTN1     | 0                 | 0.319854611540209 | 1      | 2.00E-04 | NA | NA     | 6.00E-04 | 0 |
| NM_017611    | SLC43A3    | 0                 | 0.319854611540209 | 1      | 2.00E-04 | NA | NA     | 6.00E-04 | 0 |
| NM_021115    | SEZ6L      | 0                 | 0.320308950477056 | 1      | 2.00E-04 | NA | NA     | 6.00E-04 | 0 |
| NM_001184775 | SEZ6L      | 0                 | 0.320308950477056 | 1      | 2.00E-04 | NA | NA     | 6.00E-04 | 0 |
| NM_001184777 | SEZ6L      | 0                 | 0.320308950477056 | 1      | 2.00E-04 | NA | NA     | 6.00E-04 | 0 |
| NM_001184774 | SEZ6L      | 0                 | 0.320308950477056 | 1      | 2.00E-04 | NA | NA     | 6.00E-04 | 0 |
| NM_001184773 | SEZ6L      | 0                 | 0.320308950477056 | 1      | 2.00E-04 | NA | NA     | 6.00E-04 | 0 |
| NM_001184776 | SEZ6L      | 0                 | 0.320308950477056 | 1      | 2.00E-04 | NA | NA     | 6.00E-04 | 0 |
| NM_001010853 | PM20D2     | 0                 | 0.320763289413903 | 1      | 2.00E-04 | NA | NA     | 6.00E-04 | 0 |
| NM_001197079 | IFRD1      | 0                 | 0.320763289413903 | 1      | 2.00E-04 | NA | NA     | 6.00E-04 | 0 |
| NM_001145335 | UBE2Q2     | 0                 | 0.32121762835075  | 1      | 2.00E-04 | NA | NA     | 6.00E-04 | 0 |
| NM_001284382 | UBE2Q2     | 0                 | 0.32121762835075  | 1      | 2.00E-04 | NA | NA     | 6.00E-04 | 0 |
| NM_173469    | UBE2Q2     | 0                 | 0.32121762835075  | 1      | 2.00E-04 | NA | NA     | 6.00E-04 | 0 |
| NM_004067    | CHN2       | 0                 | 0.32121762835075  | 1      | 2.00E-04 | NA | NA     | 6.00E-04 | 0 |
| NM_033261    | IDI2       | 0                 | 0.32121762835075  | 1      | 2.00E-04 | NA | NA     | 6.00E-04 | 0 |
| NM_001244701 | ZFP36L1    | 0                 | 0.321671967287597 | 1      | 2.00E-04 | NA | NA     | 6.00E-04 | 0 |
| NM_006667    | PGRMC1     | 0                 | 0.322126306224443 | 1      | 2.00E-04 | NA | NA     | 6.00E-04 | 0 |
| NM_001282621 | PGRMC1     | 0                 | 0.322126306224443 | 1      | 2.00E-04 | NA | NA     | 6.00E-04 | 0 |
| NM_003031    | SIAH1      | 0                 | 0.322126306224443 | 1      | 2.00E-04 | NA | NA     | 6.00E-04 | 0 |
| NM_000684    | ADRB1      | 0                 | 0.32258064516129  | 1      | 2.00E-04 | NA | NA     | 6.00E-04 | 0 |
| NM_178468    | FAM83C     | 0                 | 0.32258064516129  | 1      | 2.00E-04 | NA | NA     | 6.00E-04 | 0 |
| NM_182506    | MAGEB10    | 0.220354384370741 | 0.543389368468878 | 0.9998 | 2.00E-04 | 1  | 0.0626 | 6.00E-04 | 0 |
| NM_007008    | RTN4       | 0                 | 0.323034984098137 | 1      | 2.00E-04 | NA | NA     | 6.00E-04 | 0 |
| NM_080743    | SRSF12     | 0                 | 0.323489323034984 | 1      | 2.00E-04 | NA | NA     | 6.00E-04 | 0 |



|              |                  |                   |                   |        |          |    |    |          |   |
|--------------|------------------|-------------------|-------------------|--------|----------|----|----|----------|---|
| NM_001145549 | <i>TXNDC5</i>    | 0                 | 0.324398000908678 | 1      | 2.00E-04 | NA | NA | 6.00E-04 | 0 |
| NM_005251    | <i>FOXC2</i>     | 0                 | 0.324852339845525 | 1      | 2.00E-04 | NA | NA | 6.00E-04 | 0 |
| NM_024784    | <i>ZBTB3</i>     | 0                 | 0.324852339845525 | 1      | 2.00E-04 | NA | NA | 6.00E-04 | 0 |
| NM_020890    | <i>KIAA1524</i>  | 0                 | 0.324852339845525 | 1      | 2.00E-04 | NA | NA | 6.00E-04 | 0 |
| NM_001006683 | <i>SPIN2B</i>    | 0                 | 0.326215356656065 | 1      | 2.00E-04 | NA | NA | 6.00E-04 | 0 |
| NM_001006682 | <i>SPIN2B</i>    | 0                 | 0.326215356656065 | 1      | 2.00E-04 | NA | NA | 6.00E-04 | 0 |
| NM_001006681 | <i>SPIN2B</i>    | 0                 | 0.326215356656065 | 1      | 2.00E-04 | NA | NA | 6.00E-04 | 0 |
| NM_001282461 | <i>SPIN2B</i>    | 0                 | 0.326215356656065 | 1      | 2.00E-04 | NA | NA | 6.00E-04 | 0 |
| NM_001282462 | <i>SPIN2B</i>    | 0                 | 0.326215356656065 | 1      | 2.00E-04 | NA | NA | 6.00E-04 | 0 |
| NM_001190766 | <i>STMND1</i>    | 0                 | 0.326669695592912 | 1      | 2.00E-04 | NA | NA | 6.00E-04 | 0 |
| NM_001204151 | <i>MBD1</i>      | 0                 | 0.326669695592912 | 1      | 2.00E-04 | NA | NA | 6.00E-04 | 0 |
| NM_001010883 | <i>FAM102B</i>   | 0                 | 0.327124034529759 | 1      | 2.00E-04 | NA | NA | 6.00E-04 | 0 |
| NM_001278478 | <i>RUNX2</i>     | 0                 | 0.327124034529759 | 1      | 2.00E-04 | NA | NA | 6.00E-04 | 0 |
| NM_014862    | <i>ARNT2</i>     | 0                 | 0.327578373466606 | 1      | 2.00E-04 | NA | NA | 6.00E-04 | 0 |
| NR_049729    | <i>ASB16-AS1</i> | 0                 | 0.327578373466606 | 1      | 2.00E-04 | NA | NA | 6.00E-04 | 0 |
| NR_049730    | <i>ASB16-AS1</i> | 0                 | 0.327578373466606 | 1      | 2.00E-04 | NA | NA | 6.00E-04 | 0 |
| NM_198152    | <i>UTS2B</i>     | 0                 | 0.327578373466606 | 1      | 2.00E-04 | NA | NA | 6.00E-04 | 0 |
| NM_007364    | <i>TMED3</i>     | 0                 | 0.328032712403453 | 1      | 2.00E-04 | NA | NA | 6.00E-04 | 0 |
| NM_001162536 | <i>RBMXL1</i>    | 0                 | 0.328032712403453 | 1      | 2.00E-04 | NA | NA | 6.00E-04 | 0 |
| NM_001008662 | <i>CCBL2</i>     | 0                 | 0.328032712403453 | 1      | 2.00E-04 | NA | NA | 6.00E-04 | 0 |
| NM_019610    | <i>RBMXL1</i>    | 0                 | 0.328032712403453 | 1      | 2.00E-04 | NA | NA | 6.00E-04 | 0 |
| NM_001008661 | <i>CCBL2</i>     | 0                 | 0.328032712403453 | 0.9998 | 2.00E-04 | NA | NA | 6.00E-04 | 0 |
| NM_001002009 | <i>NT5C3A</i>    | 0                 | 0.328032712403453 | 1      | 2.00E-04 | NA | NA | 6.00E-04 | 0 |
| NM_001002010 | <i>NT5C3A</i>    | 0                 | 0.328032712403453 | 1      | 2.00E-04 | NA | NA | 6.00E-04 | 0 |
| NM_173800    | <i>AQPEP</i>     | 0.108132666969559 | 0.436619718309859 | 1      | 2.00E-04 | NA | NA | 6.00E-04 | 0 |
| NM_001169107 | <i>FAM21C</i>    | 0                 | 0.3284870513403   | 1      | 2.00E-04 | NA | NA | 6.00E-04 | 0 |
| NM_001169106 | <i>FAM21C</i>    | 0                 | 0.3284870513403   | 1      | 2.00E-04 | NA | NA | 6.00E-04 | 0 |
| NM_015262    | <i>FAM21C</i>    | 0                 | 0.3284870513403   | 1      | 4.00E-04 | NA | NA | 0.001    | 0 |
| NM_183374    | <i>CYP26C1</i>   | 0                 | 0.329395729213994 | 1      | 2.00E-04 | NA | NA | 6.00E-04 | 0 |
| NM_020750    | <i>XPO5</i>      | 0                 | 0.329395729213994 | 1      | 2.00E-04 | NA | NA | 6.00E-04 | 0 |
| NM_020457    | <i>THAP11</i>    | 0                 | 0.329850068150841 | 1      | 2.00E-04 | NA | NA | 6.00E-04 | 0 |
| NM_007077    | <i>AP4S1</i>     | 0                 | 0.330758746024534 | 1      | 2.00E-04 | NA | NA | 6.00E-04 | 0 |
| NM_001254726 | <i>AP4S1</i>     | 0                 | 0.330758746024534 | 1      | 2.00E-04 | NA | NA | 6.00E-04 | 0 |
| NM_001254727 | <i>AP4S1</i>     | 0                 | 0.330758746024534 | 1      | 2.00E-04 | NA | NA | 6.00E-04 | 0 |
| NM_001128126 | <i>AP4S1</i>     | 0                 | 0.330758746024534 | 1      | 2.00E-04 | NA | NA | 6.00E-04 | 0 |
| NM_001135553 | <i>MKNK1</i>     | 0                 | 0.331213084961381 | 1      | 2.00E-04 | NA | NA | 6.00E-04 | 0 |
| NM_003684    | <i>MKNK1</i>     | 0                 | 0.331213084961381 | 1      | 2.00E-04 | NA | NA | 6.00E-04 | 0 |
| NM_198973    | <i>MKNK1</i>     | 0                 | 0.331213084961381 | 1      | 2.00E-04 | NA | NA | 6.00E-04 | 0 |
| NR_024174    | <i>MKNK1</i>     | 0                 | 0.331213084961381 | 1      | 2.00E-04 | NA | NA | 6.00E-04 | 0 |
| NR_024176    | <i>MKNK1</i>     | 0                 | 0.331213084961381 | 1      | 2.00E-04 | NA | NA | 6.00E-04 | 0 |
| NM_004463    | <i>FGD1</i>      | 0                 | 0.331213084961381 | 1      | 2.00E-04 | NA | NA | 6.00E-04 | 0 |

|              |            |                   |                   |   |          |    |    |          |   |
|--------------|------------|-------------------|-------------------|---|----------|----|----|----------|---|
| NM_006455    | LEPREL4    | 0                 | 0.331667423898228 | 1 | 2.00E-04 | NA | NA | 6.00E-04 | 0 |
| NM_001002258 | ATP5G3     | 0                 | 0.331667423898228 | 1 | 2.00E-04 | NA | NA | 6.00E-04 | 0 |
| NM_006835    | CCNI       | 0                 | 0.331667423898228 | 1 | 2.00E-04 | NA | NA | 6.00E-04 | 0 |
| NM_183399    | RNF14      | 0                 | 0.332121762835075 | 1 | 2.00E-04 | NA | NA | 6.00E-04 | 0 |
| NM_001201365 | RNF14      | 0                 | 0.332121762835075 | 1 | 2.00E-04 | NA | NA | 6.00E-04 | 0 |
| NM_006180    | NTRK2      | 0                 | 0.332121762835075 | 1 | 2.00E-04 | NA | NA | 6.00E-04 | 0 |
| NM_001018064 | NTRK2      | 0                 | 0.332121762835075 | 1 | 2.00E-04 | NA | NA | 6.00E-04 | 0 |
| NM_006456    | ST6GALNAC2 | 0                 | 0.332121762835075 | 1 | 2.00E-04 | NA | NA | 6.00E-04 | 0 |
| NM_001202439 | NCR3LG1    | 0                 | 0.332576101771922 | 1 | 2.00E-04 | NA | NA | 6.00E-04 | 0 |
| NM_002686    | PNMT       | 0                 | 0.332576101771922 | 1 | 2.00E-04 | NA | NA | 6.00E-04 | 0 |
| NR_073461    | PNMT       | 0                 | 0.332576101771922 | 1 | 2.00E-04 | NA | NA | 6.00E-04 | 0 |
| NM_014953    | DIS3       | 0                 | 0.333484779645616 | 1 | 2.00E-04 | NA | NA | 6.00E-04 | 0 |
| NM_001128226 | DIS3       | 0                 | 0.333484779645616 | 1 | 2.00E-04 | NA | NA | 6.00E-04 | 0 |
| NR_046283    | NEBL-AS1   | 0                 | 0.333939118582463 | 1 | 2.00E-04 | NA | NA | 6.00E-04 | 0 |
| NM_000173    | GP1BA      | 0                 | 0.333939118582463 | 1 | 2.00E-04 | NA | NA | 6.00E-04 | 0 |
| NM_005402    | RALA       | 0                 | 0.333939118582463 | 1 | 2.00E-04 | NA | NA | 6.00E-04 | 0 |
| NM_005160    | ADRBK2     | 0                 | 0.334393457519309 | 1 | 2.00E-04 | NA | NA | 6.00E-04 | 0 |
| NM_001002911 | GPR139     | 0                 | 0.334393457519309 | 1 | 2.00E-04 | NA | NA | 6.00E-04 | 0 |
| NM_001198832 | PDE4DIP    | 0                 | 0.334847796456156 | 1 | 2.00E-04 | NA | NA | 6.00E-04 | 0 |
| NR_027182    | JMJD1C-AS1 | 0                 | 0.335302135393003 | 1 | 2.00E-04 | NA | NA | 6.00E-04 | 0 |
| NM_001276249 | LDLRAD4    | 0                 | 0.335302135393003 | 1 | 2.00E-04 | NA | NA | 6.00E-04 | 0 |
| NM_024958    | NRSN2      | 0                 | 0.335302135393003 | 1 | 2.00E-04 | NA | NA | 6.00E-04 | 0 |
| NM_000126    | ETFA       | 0                 | 0.335302135393003 | 1 | 2.00E-04 | NA | NA | 6.00E-04 | 0 |
| NM_001127716 | ETFA       | 0                 | 0.335302135393003 | 1 | 2.00E-04 | NA | NA | 6.00E-04 | 0 |
| NM_207040    | TCF12      | 0                 | 0.33575647432985  | 1 | 2.00E-04 | NA | NA | 6.00E-04 | 0 |
| NM_212551    | LYSMD1     | 0                 | 0.33575647432985  | 1 | 2.00E-04 | NA | NA | 6.00E-04 | 0 |
| NM_001136543 | LYSMD1     | 0                 | 0.33575647432985  | 1 | 2.00E-04 | NA | NA | 6.00E-04 | 0 |
| NM_003553    | OR1E1      | 0                 | 0.33575647432985  | 1 | 2.00E-04 | NA | NA | 6.00E-04 | 0 |
| NM_025184    | EFHC2      | 0                 | 0.33575647432985  | 1 | 2.00E-04 | NA | NA | 6.00E-04 | 0 |
| NR_028287    | GABARAPL3  | 0                 | 0.336210813266697 | 1 | 2.00E-04 | NA | NA | 6.00E-04 | 0 |
| NM_022336    | EDAR       | 0                 | 0.336665152203544 | 1 | 2.00E-04 | NA | NA | 6.00E-04 | 0 |
| NM_006690    | MMP24      | 0                 | 0.337119491140391 | 1 | 2.00E-04 | NA | NA | 6.00E-04 | 0 |
| NM_003458    | BSN        | 0                 | 0.337573830077238 | 1 | 2.00E-04 | NA | NA | 6.00E-04 | 0 |
| NR_033961    | LSP1P3     | 0                 | 0.337573830077238 | 1 | 2.00E-04 | NA | NA | 6.00E-04 | 0 |
| NR_003010    | SCARNA12   | 0                 | 0.337573830077238 | 1 | 2.00E-04 | NA | NA | 6.00E-04 | 0 |
| NM_001127322 | CBX5       | 0                 | 0.338028169014085 | 1 | 2.00E-04 | NA | NA | 6.00E-04 | 0 |
| NM_144693    | ZNF558     | 0                 | 0.338936846887778 | 1 | 2.00E-04 | NA | NA | 6.00E-04 | 0 |
| NM_001142552 | DCHS2      | 0                 | 0.338936846887778 | 1 | 2.00E-04 | NA | NA | 6.00E-04 | 0 |
| NM_001142553 | DCHS2      | 0                 | 0.338936846887778 | 1 | 2.00E-04 | NA | NA | 6.00E-04 | 0 |
| NM_004219    | PTTG1      | 0.113584734211722 | 0.4525215810995   | 1 | 2.00E-04 | NA | NA | 6.00E-04 | 0 |
| NR_029696    | MIR127     | 0                 | 0.339391185824625 | 1 | 2.00E-04 | NA | NA | 6.00E-04 | 0 |

|              |                  |   |                   |   |          |    |    |          |   |
|--------------|------------------|---|-------------------|---|----------|----|----|----------|---|
| NM_001004488 | <i>OR2A25</i>    | 0 | 0.339391185824625 | 1 | 2.00E-04 | NA | NA | 6.00E-04 | 0 |
| NM_170713    | <i>RASSF1</i>    | 0 | 0.339391185824625 | 1 | 2.00E-04 | NA | NA | 6.00E-04 | 0 |
| NM_170712    | <i>RASSF1</i>    | 0 | 0.339391185824625 | 1 | 2.00E-04 | NA | NA | 6.00E-04 | 0 |
| NM_014301    | <i>ISCU</i>      | 0 | 0.339845524761472 | 1 | 2.00E-04 | NA | NA | 6.00E-04 | 0 |
| NM_213595    | <i>ISCU</i>      | 0 | 0.339845524761472 | 1 | 2.00E-04 | NA | NA | 6.00E-04 | 0 |
| NM_001040078 | <i>LGALS9C</i>   | 0 | 0.339845524761472 | 1 | 2.00E-04 | NA | NA | 6.00E-04 | 0 |
| NM_007021    | <i>C10orf10</i>  | 0 | 0.339845524761472 | 1 | 2.00E-04 | NA | NA | 6.00E-04 | 0 |
| NM_001005491 | <i>OR10AG1</i>   | 0 | 0.339845524761472 | 1 | 2.00E-04 | NA | NA | 6.00E-04 | 0 |
| NM_001242581 | <i>RIN2</i>      | 0 | 0.340754202635166 | 1 | 2.00E-04 | NA | NA | 6.00E-04 | 0 |
| NM_003523    | <i>HIST1H2BE</i> | 0 | 0.340754202635166 | 1 | 2.00E-04 | NA | NA | 6.00E-04 | 0 |
| NM_006468    | <i>POLR3C</i>    | 0 | 0.340754202635166 | 1 | 2.00E-04 | NA | NA | 6.00E-04 | 0 |
| NM_173352    | <i>KRT78</i>     | 0 | 0.340754202635166 | 1 | 2.00E-04 | NA | NA | 6.00E-04 | 0 |
| NM_020988    | <i>GNAO1</i>     | 0 | 0.341208541572013 | 1 | 2.00E-04 | NA | NA | 6.00E-04 | 0 |
| NM_138736    | <i>GNAO1</i>     | 0 | 0.341208541572013 | 1 | 2.00E-04 | NA | NA | 6.00E-04 | 0 |
| NM_004379    | <i>CREB1</i>     | 0 | 0.341208541572013 | 1 | 2.00E-04 | NA | NA | 6.00E-04 | 0 |
| NM_134442    | <i>CREB1</i>     | 0 | 0.341208541572013 | 1 | 2.00E-04 | NA | NA | 6.00E-04 | 0 |
| NM_001079537 | <i>TRAPPC6B</i>  | 0 | 0.341208541572013 | 1 | 2.00E-04 | NA | NA | 6.00E-04 | 0 |
| NM_177452    | <i>TRAPPC6B</i>  | 0 | 0.341208541572013 | 1 | 2.00E-04 | NA | NA | 6.00E-04 | 0 |
| NM_025128    | <i>MUS81</i>     | 0 | 0.34166288050886  | 1 | 2.00E-04 | NA | NA | 6.00E-04 | 0 |
| NM_032088    | <i>PCDHGA8</i>   | 0 | 0.342117219445706 | 1 | 2.00E-04 | NA | NA | 6.00E-04 | 0 |
| NM_014004    | <i>PCDHGA8</i>   | 0 | 0.342117219445706 | 1 | 2.00E-04 | NA | NA | 6.00E-04 | 0 |
| NM_001146705 | <i>KDM5D</i>     | 0 | 0.342117219445706 | 1 | 2.00E-04 | NA | NA | 6.00E-04 | 0 |
| NM_001146706 | <i>KDM5D</i>     | 0 | 0.342117219445706 | 1 | 2.00E-04 | NA | NA | 6.00E-04 | 0 |
| NM_004653    | <i>KDM5D</i>     | 0 | 0.342117219445706 | 1 | 2.00E-04 | NA | NA | 6.00E-04 | 0 |
| NM_019557    | <i>MTFR1L</i>    | 0 | 0.3430258973194   | 1 | 2.00E-04 | NA | NA | 6.00E-04 | 0 |
| NM_001004309 | <i>ZNF774</i>    | 0 | 0.3430258973194   | 1 | 2.00E-04 | NA | NA | 6.00E-04 | 0 |
| NM_016180    | <i>SLC45A2</i>   | 0 | 0.343480236256247 | 1 | 2.00E-04 | NA | NA | 6.00E-04 | 0 |
| NM_001012509 | <i>SLC45A2</i>   | 0 | 0.343480236256247 | 1 | 2.00E-04 | NA | NA | 6.00E-04 | 0 |
| NM_024041    | <i>SCNM1</i>     | 0 | 0.343934575193094 | 1 | 2.00E-04 | NA | NA | 6.00E-04 | 0 |
| NR_037937    | <i>SCNM1</i>     | 0 | 0.343934575193094 | 1 | 2.00E-04 | NA | NA | 6.00E-04 | 0 |
| NM_001204856 | <i>SCNM1</i>     | 0 | 0.343934575193094 | 1 | 2.00E-04 | NA | NA | 6.00E-04 | 0 |
| NM_024422    | <i>DSC2</i>      | 0 | 0.343934575193094 | 1 | 2.00E-04 | NA | NA | 6.00E-04 | 0 |
| NM_004949    | <i>DSC2</i>      | 0 | 0.343934575193094 | 1 | 2.00E-04 | NA | NA | 6.00E-04 | 0 |
| NM_001134453 | <i>DSG4</i>      | 0 | 0.344388914129941 | 1 | 2.00E-04 | NA | NA | 6.00E-04 | 0 |
| NM_177986    | <i>DSG4</i>      | 0 | 0.344388914129941 | 1 | 2.00E-04 | NA | NA | 6.00E-04 | 0 |
| NM_001193311 | <i>C7orf10</i>   | 0 | 0.344388914129941 | 1 | 2.00E-04 | NA | NA | 6.00E-04 | 0 |
| NM_001193313 | <i>C7orf10</i>   | 0 | 0.344388914129941 | 1 | 2.00E-04 | NA | NA | 6.00E-04 | 0 |
| NM_001193312 | <i>C7orf10</i>   | 0 | 0.344388914129941 | 1 | 2.00E-04 | NA | NA | 6.00E-04 | 0 |
| NM_024728    | <i>C7orf10</i>   | 0 | 0.344388914129941 | 1 | 2.00E-04 | NA | NA | 6.00E-04 | 0 |
| NM_001099224 | <i>IFT74</i>     | 0 | 0.344843253066788 | 1 | 2.00E-04 | NA | NA | 6.00E-04 | 0 |
| NM_025103    | <i>IFT74</i>     | 0 | 0.344843253066788 | 1 | 2.00E-04 | NA | NA | 6.00E-04 | 0 |

|              |                  |                  |                   |   |          |    |    |          |   |
|--------------|------------------|------------------|-------------------|---|----------|----|----|----------|---|
| NM_194285    | <i>SPTY2D1</i>   | 0                | 0.344843253066788 | 1 | 2.00E-04 | NA | NA | 6.00E-04 | 0 |
| NM_003039    | <i>SLC2A5</i>    | 0                | 0.345297592003635 | 1 | 2.00E-04 | NA | NA | 6.00E-04 | 0 |
| NM_001135585 | <i>SLC2A5</i>    | 0                | 0.345297592003635 | 1 | 2.00E-04 | NA | NA | 6.00E-04 | 0 |
| NM_001206839 | <i>PTPRZ1</i>    | 0                | 0.345751930940482 | 1 | 2.00E-04 | NA | NA | 6.00E-04 | 0 |
| NM_002851    | <i>PTPRZ1</i>    | 0                | 0.345751930940482 | 1 | 2.00E-04 | NA | NA | 6.00E-04 | 0 |
| NM_001206838 | <i>PTPRZ1</i>    | 0                | 0.345751930940482 | 1 | 2.00E-04 | NA | NA | 6.00E-04 | 0 |
| NM_001135110 | <i>DNAJA3</i>    | 0                | 0.346206269877328 | 1 | 2.00E-04 | NA | NA | 6.00E-04 | 0 |
| NM_005147    | <i>DNAJA3</i>    | 0                | 0.346206269877328 | 1 | 2.00E-04 | NA | NA | 6.00E-04 | 0 |
| NM_153047    | <i>FYN</i>       | 0                | 0.346660608814175 | 1 | 2.00E-04 | NA | NA | 6.00E-04 | 0 |
| NM_004943    | <i>DMWD</i>      | 0                | 0.347114947751022 | 1 | 2.00E-04 | NA | NA | 6.00E-04 | 0 |
| NM_001177478 | <i>HDX</i>       | 0                | 0.347114947751022 | 1 | 2.00E-04 | NA | NA | 6.00E-04 | 0 |
| NM_001177479 | <i>HDX</i>       | 0                | 0.347114947751022 | 1 | 2.00E-04 | NA | NA | 6.00E-04 | 0 |
| NM_144657    | <i>HDX</i>       | 0                | 0.347114947751022 | 1 | 2.00E-04 | NA | NA | 6.00E-04 | 0 |
| NR_038274    | <i>LINC00933</i> | 0                | 0.347569286687869 | 1 | 2.00E-04 | NA | NA | 6.00E-04 | 0 |
| NM_001134423 | <i>CDV3</i>      | 0                | 0.347569286687869 | 1 | 2.00E-04 | NA | NA | 6.00E-04 | 0 |
| NM_001282763 | <i>CDV3</i>      | 0                | 0.347569286687869 | 1 | 2.00E-04 | NA | NA | 6.00E-04 | 0 |
| NM_001282764 | <i>CDV3</i>      | 0                | 0.347569286687869 | 1 | 2.00E-04 | NA | NA | 6.00E-04 | 0 |
| NM_001282765 | <i>CDV3</i>      | 0                | 0.347569286687869 | 1 | 2.00E-04 | NA | NA | 6.00E-04 | 0 |
| NM_005871    | <i>SMNDC1</i>    | 0                | 0.347569286687869 | 1 | 2.00E-04 | NA | NA | 6.00E-04 | 0 |
| NM_031409    | <i>CCR6</i>      | 0                | 0.348023625624716 | 1 | 2.00E-04 | NA | NA | 6.00E-04 | 0 |
| NM_005258    | <i>GCHFR</i>     | 0                | 0.348477964561563 | 1 | 2.00E-04 | NA | NA | 6.00E-04 | 0 |
| NM_001099756 | <i>SYBU</i>      | 0                | 0.349386642435257 | 1 | 2.00E-04 | NA | NA | 6.00E-04 | 0 |
| NM_032353    | <i>VPS25</i>     | 0                | 0.349840981372104 | 1 | 2.00E-04 | NA | NA | 6.00E-04 | 0 |
| NM_017626    | <i>DNAJB12</i>   | 0                | 0.349840981372104 | 1 | 2.00E-04 | NA | NA | 6.00E-04 | 0 |
| NM_001002762 | <i>DNAJB12</i>   | 0                | 0.349840981372104 | 1 | 2.00E-04 | NA | NA | 6.00E-04 | 0 |
| NM_001136002 | <i>TMEM229A</i>  | 0                | 0.349840981372104 | 1 | 2.00E-04 | NA | NA | 6.00E-04 | 0 |
| NM_003086    | <i>SNAPC4</i>    | 0                | 0.349840981372104 | 1 | 2.00E-04 | NA | NA | 6.00E-04 | 0 |
| NM_005584    | <i>MAB21L1</i>   | 0.11676510676965 | 0.467060427078601 | 1 | 2.00E-04 | NA | NA | 6.00E-04 | 0 |
| NM_022658    | <i>HOXC8</i>     | 0                | 0.350749659245797 | 1 | 2.00E-04 | NA | NA | 6.00E-04 | 0 |
| NM_000028    | <i>AGL</i>       | 0                | 0.351203998182644 | 1 | 2.00E-04 | NA | NA | 6.00E-04 | 0 |
| NM_000643    | <i>AGL</i>       | 0                | 0.351203998182644 | 1 | 2.00E-04 | NA | NA | 6.00E-04 | 0 |
| NM_000644    | <i>AGL</i>       | 0                | 0.351203998182644 | 1 | 2.00E-04 | NA | NA | 6.00E-04 | 0 |
| NM_014038    | <i>BZW2</i>      | 0                | 0.351203998182644 | 1 | 2.00E-04 | NA | NA | 6.00E-04 | 0 |
| NM_001159767 | <i>BZW2</i>      | 0                | 0.351203998182644 | 1 | 2.00E-04 | NA | NA | 6.00E-04 | 0 |
| NR_027624    | <i>BZW2</i>      | 0                | 0.351203998182644 | 1 | 2.00E-04 | NA | NA | 6.00E-04 | 0 |
| NM_018164    | <i>ASUN</i>      | 0                | 0.351203998182644 | 1 | 2.00E-04 | NA | NA | 6.00E-04 | 0 |
| NM_001322    | <i>CST2</i>      | 0                | 0.351203998182644 | 1 | 2.00E-04 | NA | NA | 6.00E-04 | 0 |
| NM_001077186 | <i>MYH14</i>     | 0                | 0.352112676056338 | 1 | 2.00E-04 | NA | NA | 6.00E-04 | 0 |
| NM_024729    | <i>MYH14</i>     | 0                | 0.352112676056338 | 1 | 2.00E-04 | NA | NA | 6.00E-04 | 0 |
| NM_001145809 | <i>MYH14</i>     | 0                | 0.352112676056338 | 1 | 2.00E-04 | NA | NA | 6.00E-04 | 0 |
| NM_020346    | <i>SLC17A6</i>   | 0                | 0.352567014993185 | 1 | 2.00E-04 | NA | NA | 6.00E-04 | 0 |

|              |                  |                    |                   |   |          |    |    |          |   |
|--------------|------------------|--------------------|-------------------|---|----------|----|----|----------|---|
| NM_024072    | <i>DDX54</i>     | 0                  | 0.352567014993185 | 1 | 2.00E-04 | NA | NA | 6.00E-04 | 0 |
| NM_001111322 | <i>DDX54</i>     | 0                  | 0.352567014993185 | 1 | 2.00E-04 | NA | NA | 6.00E-04 | 0 |
| NM_001282552 | <i>BTBD3</i>     | 0                  | 0.353021353930032 | 1 | 2.00E-04 | NA | NA | 6.00E-04 | 0 |
| NM_181443    | <i>BTBD3</i>     | 0                  | 0.353021353930032 | 1 | 2.00E-04 | NA | NA | 6.00E-04 | 0 |
| NM_001001960 | <i>OR5W2</i>     | 0                  | 0.353021353930032 | 1 | 2.00E-04 | NA | NA | 6.00E-04 | 0 |
| NM_052892    | <i>PKD1L2</i>    | 0                  | 0.353475692866879 | 1 | 2.00E-04 | NA | NA | 6.00E-04 | 0 |
| NM_001076780 | <i>PKD1L2</i>    | 0                  | 0.353475692866879 | 1 | 2.00E-04 | NA | NA | 6.00E-04 | 0 |
| NR_036129    | <i>MIR3170</i>   | 0                  | 0.353930031803726 | 1 | 2.00E-04 | NA | NA | 6.00E-04 | 0 |
| NM_001134422 | <i>CDV3</i>      | 0                  | 0.353930031803726 | 1 | 2.00E-04 | NA | NA | 6.00E-04 | 0 |
| NM_017548    | <i>CDV3</i>      | 0                  | 0.353930031803726 | 1 | 2.00E-04 | NA | NA | 6.00E-04 | 0 |
| NM_001282762 | <i>CDV3</i>      | 0                  | 0.353930031803726 | 1 | 2.00E-04 | NA | NA | 6.00E-04 | 0 |
| NR_024066    | <i>CLRN1-AS1</i> | 0                  | 0.353930031803726 | 1 | 2.00E-04 | NA | NA | 6.00E-04 | 0 |
| NM_004722    | <i>AP4M1</i>     | 0                  | 0.353930031803726 | 1 | 2.00E-04 | NA | NA | 6.00E-04 | 0 |
| NM_001206671 | <i>RIC3</i>      | 0                  | 0.353930031803726 | 1 | 2.00E-04 | NA | NA | 6.00E-04 | 0 |
| NM_001135109 | <i>RIC3</i>      | 0                  | 0.353930031803726 | 1 | 2.00E-04 | NA | NA | 6.00E-04 | 0 |
| NM_001206672 | <i>RIC3</i>      | 0                  | 0.353930031803726 | 1 | 2.00E-04 | NA | NA | 6.00E-04 | 0 |
| NM_024557    | <i>RIC3</i>      | 0                  | 0.353930031803726 | 1 | 2.00E-04 | NA | NA | 6.00E-04 | 0 |
| NR_045405    | <i>RIC3</i>      | 0                  | 0.353930031803726 | 1 | 2.00E-04 | NA | NA | 6.00E-04 | 0 |
| NM_001143775 | <i>CTDNBP1</i>   | 0                  | 0.353930031803726 | 1 | 2.00E-04 | NA | NA | 6.00E-04 | 0 |
| NM_016076    | <i>DES12</i>     | 0                  | 0.354384370740572 | 1 | 2.00E-04 | NA | NA | 6.00E-04 | 0 |
| NM_005614    | <i>RHEB</i>      | 0                  | 0.355293048614266 | 1 | 2.00E-04 | NA | NA | 6.00E-04 | 0 |
| NM_006914    | <i>RORB</i>      | 0                  | 0.355747387551113 | 1 | 2.00E-04 | NA | NA | 6.00E-04 | 0 |
| NM_199329    | <i>SLC43A3</i>   | 0                  | 0.355747387551113 | 1 | 2.00E-04 | NA | NA | 6.00E-04 | 0 |
| NM_014096    | <i>SLC43A3</i>   | 0                  | 0.355747387551113 | 1 | 2.00E-04 | NA | NA | 6.00E-04 | 0 |
| NM_001278201 | <i>SLC43A3</i>   | 0                  | 0.355747387551113 | 1 | 2.00E-04 | NA | NA | 6.00E-04 | 0 |
| NM_001278206 | <i>SLC43A3</i>   | 0                  | 0.355747387551113 | 1 | 2.00E-04 | NA | NA | 6.00E-04 | 0 |
| NM_001005323 | <i>OR5AK2</i>    | 0                  | 0.35620172648796  | 1 | 2.00E-04 | NA | NA | 6.00E-04 | 0 |
| NM_152358    | <i>IZUMO2</i>    | 0                  | 0.35620172648796  | 1 | 2.00E-04 | NA | NA | 6.00E-04 | 0 |
| NM_020971    | <i>SPTBN4</i>    | 0                  | 0.356656065424807 | 1 | 2.00E-04 | NA | NA | 6.00E-04 | 0 |
| NM_001193487 | <i>GTF2A1L</i>   | 0                  | 0.356656065424807 | 1 | 2.00E-04 | NA | NA | 6.00E-04 | 0 |
| NM_006872    | <i>GTF2A1L</i>   | 0                  | 0.356656065424807 | 1 | 2.00E-04 | NA | NA | 6.00E-04 | 0 |
| NM_001136050 | <i>DHRS1</i>     | 0                  | 0.357110404361654 | 1 | 2.00E-04 | NA | NA | 6.00E-04 | 0 |
| NM_000713    | <i>BLVRB</i>     | 0                  | 0.357110404361654 | 1 | 2.00E-04 | NA | NA | 6.00E-04 | 0 |
| NM_197965    | <i>SLC10A6</i>   | 0                  | 0.357110404361654 | 1 | 2.00E-04 | NA | NA | 6.00E-04 | 0 |
| NM_003014    | <i>SFRP4</i>     | 0                  | 0.357110404361654 | 1 | 2.00E-04 | NA | NA | 6.00E-04 | 0 |
| NM_181698    | <i>CCNY</i>      | 0                  | 0.357564743298501 | 1 | 2.00E-04 | NA | NA | 6.00E-04 | 0 |
| NM_000676    | <i>ADORA2B</i>   | 0                  | 0.357564743298501 | 1 | 4.00E-04 | NA | NA | 0.001    | 0 |
| NM_031207    | <i>HYI</i>       | 0                  | 0.357564743298501 | 1 | 2.00E-04 | NA | NA | 6.00E-04 | 0 |
| NM_001190880 | <i>HYI</i>       | 0                  | 0.357564743298501 | 1 | 2.00E-04 | NA | NA | 6.00E-04 | 0 |
| NM_001243526 | <i>HYI</i>       | 0                  | 0.357564743298501 | 1 | 2.00E-04 | NA | NA | 6.00E-04 | 0 |
| NM_001256733 | <i>SSBP2</i>     | 0.0795093139482054 | 0.437528396183553 | 1 | 2.00E-04 | NA | NA | 6.00E-04 | 0 |

|              |           |                    |                   |   |          |    |    |          |   |
|--------------|-----------|--------------------|-------------------|---|----------|----|----|----------|---|
| NM_001256736 | SSBP2     | 0.0795093139482054 | 0.437528396183553 | 1 | 2.00E-04 | NA | NA | 6.00E-04 | 0 |
| NM_001256735 | SSBP2     | 0.0795093139482054 | 0.437528396183553 | 1 | 2.00E-04 | NA | NA | 6.00E-04 | 0 |
| NM_001256734 | SSBP2     | 0.0795093139482054 | 0.437528396183553 | 1 | 2.00E-04 | NA | NA | 6.00E-04 | 0 |
| NM_001256732 | SSBP2     | 0.0795093139482054 | 0.437528396183553 | 1 | 2.00E-04 | NA | NA | 6.00E-04 | 0 |
| NM_012446    | SSBP2     | 0.0795093139482054 | 0.437528396183553 | 1 | 2.00E-04 | NA | NA | 6.00E-04 | 0 |
| NM_001570    | IRAK2     | 0                  | 0.358019082235348 | 1 | 2.00E-04 | NA | NA | 6.00E-04 | 0 |
| NM_001256169 | APOM      | 0                  | 0.358019082235348 | 1 | 2.00E-04 | NA | NA | 6.00E-04 | 0 |
| NR_045828    | APOM      | 0                  | 0.358019082235348 | 1 | 2.00E-04 | NA | NA | 6.00E-04 | 0 |
| NM_015343    | CTDNEP1   | 0                  | 0.358019082235348 | 1 | 2.00E-04 | NA | NA | 6.00E-04 | 0 |
| NM_007245    | ATXN2L    | 0                  | 0.358473421172194 | 1 | 2.00E-04 | NA | NA | 6.00E-04 | 0 |
| NM_148415    | ATXN2L    | 0                  | 0.358473421172194 | 1 | 2.00E-04 | NA | NA | 6.00E-04 | 0 |
| NM_148416    | ATXN2L    | 0                  | 0.358473421172194 | 1 | 2.00E-04 | NA | NA | 6.00E-04 | 0 |
| NM_145714    | ATXN2L    | 0                  | 0.358473421172194 | 1 | 2.00E-04 | NA | NA | 6.00E-04 | 0 |
| NM_017492    | ATXN2L    | 0                  | 0.358473421172194 | 1 | 2.00E-04 | NA | NA | 6.00E-04 | 0 |
| NM_148414    | ATXN2L    | 0                  | 0.358473421172194 | 1 | 2.00E-04 | NA | NA | 6.00E-04 | 0 |
| NM_173479    | WDR88     | 0                  | 0.358473421172194 | 1 | 2.00E-04 | NA | NA | 6.00E-04 | 0 |
| NM_002201    | ISG20     | 0                  | 0.358927760109041 | 1 | 2.00E-04 | NA | NA | 6.00E-04 | 0 |
| NM_020187    | HMCES     | 0                  | 0.358927760109041 | 1 | 2.00E-04 | NA | NA | 6.00E-04 | 0 |
| NM_001006109 | HMCES     | 0                  | 0.358927760109041 | 1 | 2.00E-04 | NA | NA | 6.00E-04 | 0 |
| NM_175859    | CTPS2     | 0                  | 0.358927760109041 | 1 | 2.00E-04 | NA | NA | 6.00E-04 | 0 |
| NM_019857    | CTPS2     | 0                  | 0.358927760109041 | 1 | 2.00E-04 | NA | NA | 6.00E-04 | 0 |
| NM_001017405 | MAEA      | 0                  | 0.359382099045888 | 1 | 2.00E-04 | NA | NA | 6.00E-04 | 0 |
| NM_005882    | MAEA      | 0                  | 0.359382099045888 | 1 | 2.00E-04 | NA | NA | 6.00E-04 | 0 |
| NM_182541    | TMEM31    | 0                  | 0.360290776919582 | 1 | 2.00E-04 | NA | NA | 6.00E-04 | 0 |
| NM_001040619 | ATF3      | 0.0436165379373012 | 0.404815992730577 | 1 | 2.00E-04 | NA | NA | 6.00E-04 | 0 |
| NM_001674    | ATF3      | 0.0436165379373012 | 0.404815992730577 | 1 | 2.00E-04 | NA | NA | 6.00E-04 | 0 |
| NM_001206484 | ATF3      | 0.0436165379373012 | 0.404815992730577 | 1 | 2.00E-04 | NA | NA | 6.00E-04 | 0 |
| NM_001206488 | ATF3      | 0.0436165379373012 | 0.404815992730577 | 1 | 2.00E-04 | NA | NA | 6.00E-04 | 0 |
| NM_001243299 | APLP2     | 0                  | 0.361653793730123 | 1 | 2.00E-04 | NA | NA | 6.00E-04 | 0 |
| NM_002115    | HK3       | 0                  | 0.361653793730123 | 1 | 2.00E-04 | NA | NA | 6.00E-04 | 0 |
| NM_001278711 | NRN1      | 0                  | 0.36210813266697  | 1 | 2.00E-04 | NA | NA | 6.00E-04 | 0 |
| NM_003010    | MAP2K4    | 0                  | 0.362562471603816 | 1 | 2.00E-04 | NA | NA | 6.00E-04 | 0 |
| NM_001281435 | MAP2K4    | 0                  | 0.362562471603816 | 1 | 2.00E-04 | NA | NA | 6.00E-04 | 0 |
| NM_173830    | CEP57L1   | 0                  | 0.362562471603816 | 1 | 2.00E-04 | NA | NA | 6.00E-04 | 0 |
| NR_024420    | LINC00937 | 0                  | 0.362562471603816 | 1 | 2.00E-04 | NA | NA | 6.00E-04 | 0 |
| NM_012369    | OR2F1     | 0                  | 0.363016810540663 | 1 | 2.00E-04 | NA | NA | 6.00E-04 | 0 |
| NM_001162422 | ETS1      | 0                  | 0.363016810540663 | 1 | 2.00E-04 | NA | NA | 6.00E-04 | 0 |
| NM_005238    | ETS1      | 0                  | 0.363016810540663 | 1 | 2.00E-04 | NA | NA | 6.00E-04 | 0 |
| NM_001163499 | FBXO24    | 0                  | 0.36347114947751  | 1 | 2.00E-04 | NA | NA | 6.00E-04 | 0 |
| NM_012172    | FBXO24    | 0                  | 0.36347114947751  | 1 | 2.00E-04 | NA | NA | 6.00E-04 | 0 |
| NM_003482    | KMT2D     | 0                  | 0.36347114947751  | 1 | 2.00E-04 | NA | NA | 6.00E-04 | 0 |

|              |              |                    |                   |   |          |    |    |          |   |
|--------------|--------------|--------------------|-------------------|---|----------|----|----|----------|---|
| NR_040109    | LOC100505495 | 0                  | 0.36347114947751  | 1 | 2.00E-04 | NA | NA | 6.00E-04 | 0 |
| NM_002838    | PTPRC        | 0                  | 0.363925488414357 | 1 | 2.00E-04 | NA | NA | 6.00E-04 | 0 |
| NR_052021    | PTPRC        | 0                  | 0.363925488414357 | 1 | 2.00E-04 | NA | NA | 6.00E-04 | 0 |
| NM_080921    | PTPRC        | 0                  | 0.363925488414357 | 1 | 2.00E-04 | NA | NA | 6.00E-04 | 0 |
| NM_001267798 | PTPRC        | 0                  | 0.363925488414357 | 1 | 2.00E-04 | NA | NA | 6.00E-04 | 0 |
| NM_006474    | PDPN         | 0                  | 0.364379827351204 | 1 | 2.00E-04 | NA | NA | 6.00E-04 | 0 |
| NM_198389    | PDPN         | 0                  | 0.364379827351204 | 1 | 2.00E-04 | NA | NA | 6.00E-04 | 0 |
| NR_038879    | PAXBP1-AS1   | 0                  | 0.364834166288051 | 1 | 2.00E-04 | NA | NA | 6.00E-04 | 0 |
| NR_038880    | PAXBP1-AS1   | 0                  | 0.364834166288051 | 1 | 2.00E-04 | NA | NA | 6.00E-04 | 0 |
| NM_020211    | RGMA         | 0                  | 0.365288505224898 | 1 | 2.00E-04 | NA | NA | 6.00E-04 | 0 |
| NM_001284401 | TAMM41       | 0                  | 0.365288505224898 | 1 | 2.00E-04 | NA | NA | 6.00E-04 | 0 |
| NM_138807    | TAMM41       | 0                  | 0.365288505224898 | 1 | 2.00E-04 | NA | NA | 6.00E-04 | 0 |
| NR_104314    | TAMM41       | 0                  | 0.365288505224898 | 1 | 2.00E-04 | NA | NA | 6.00E-04 | 0 |
| NM_001256372 | E2F8         | 0                  | 0.365742844161745 | 1 | 2.00E-04 | NA | NA | 6.00E-04 | 0 |
| NM_024680    | E2F8         | 0                  | 0.365742844161745 | 1 | 2.00E-04 | NA | NA | 6.00E-04 | 0 |
| NM_001256371 | E2F8         | 0                  | 0.365742844161745 | 1 | 2.00E-04 | NA | NA | 6.00E-04 | 0 |
| NR_045725    | CACNA1C-AS1  | 0                  | 0.365742844161745 | 1 | 2.00E-04 | NA | NA | 6.00E-04 | 0 |
| NM_001166163 | PPP1R9A      | 0.0408905043162199 | 0.406633348477965 | 1 | 2.00E-04 | NA | NA | 6.00E-04 | 0 |
| NM_001166161 | PPP1R9A      | 0.0408905043162199 | 0.406633348477965 | 1 | 2.00E-04 | NA | NA | 6.00E-04 | 0 |
| NM_001166162 | PPP1R9A      | 0.0408905043162199 | 0.406633348477965 | 1 | 2.00E-04 | NA | NA | 6.00E-04 | 0 |
| NM_015533    | DAK          | 0                  | 0.366197183098592 | 1 | 2.00E-04 | NA | NA | 6.00E-04 | 0 |
| NM_176894    | P2RY13       | 0                  | 0.366197183098592 | 1 | 2.00E-04 | NA | NA | 6.00E-04 | 0 |
| NM_031276    | TEX11        | 0                  | 0.366197183098592 | 1 | 2.00E-04 | NA | NA | 6.00E-04 | 0 |
| NM_001003811 | TEX11        | 0                  | 0.366197183098592 | 1 | 2.00E-04 | NA | NA | 6.00E-04 | 0 |
| NM_001135051 | FAM160B1     | 0                  | 0.366651522035438 | 1 | 2.00E-04 | NA | NA | 6.00E-04 | 0 |
| NM_020940    | FAM160B1     | 0                  | 0.366651522035438 | 1 | 2.00E-04 | NA | NA | 6.00E-04 | 0 |
| NM_006618    | KDM5B        | 0                  | 0.366651522035438 | 1 | 2.00E-04 | NA | NA | 6.00E-04 | 0 |
| NM_175054    | HIST4H4      | 0                  | 0.366651522035438 | 1 | 2.00E-04 | NA | NA | 6.00E-04 | 0 |
| NM_001102668 | PSMA4        | 0                  | 0.368923216719673 | 1 | 2.00E-04 | NA | NA | 6.00E-04 | 0 |
| NM_001102667 | PSMA4        | 0                  | 0.368923216719673 | 1 | 2.00E-04 | NA | NA | 6.00E-04 | 0 |
| NM_002789    | PSMA4        | 0                  | 0.368923216719673 | 1 | 2.00E-04 | NA | NA | 6.00E-04 | 0 |
| NM_004643    | PABPN1       | 0                  | 0.369831894593367 | 1 | 2.00E-04 | NA | NA | 6.00E-04 | 0 |
| NM_001042416 | ZNF596       | 0                  | 0.369831894593367 | 1 | 2.00E-04 | NA | NA | 6.00E-04 | 0 |
| NM_001042415 | ZNF596       | 0                  | 0.369831894593367 | 1 | 2.00E-04 | NA | NA | 6.00E-04 | 0 |
| NM_144622    | DCST2        | 0                  | 0.369831894593367 | 1 | 2.00E-04 | NA | NA | 6.00E-04 | 0 |
| NM_001144915 | FGFR2        | 0.0236256247160382 | 0.393911858246252 | 1 | 2.00E-04 | NA | NA | 6.00E-04 | 0 |
| NM_001100121 | ECE2         | 0                  | 0.370286233530214 | 1 | 2.00E-04 | NA | NA | 6.00E-04 | 0 |
| NM_001100120 | ECE2         | 0                  | 0.370286233530214 | 1 | 2.00E-04 | NA | NA | 6.00E-04 | 0 |
| NM_001037324 | ECE2         | 0                  | 0.370286233530214 | 1 | 2.00E-04 | NA | NA | 6.00E-04 | 0 |
| NM_001035513 | SDHC         | 0                  | 0.37074057246706  | 1 | 2.00E-04 | NA | NA | 6.00E-04 | 0 |
| NM_001278172 | SDHC         | 0                  | 0.37074057246706  | 1 | 4.00E-04 | NA | NA | 0.001    | 0 |

|              |                 |   |                   |   |          |    |    |          |   |
|--------------|-----------------|---|-------------------|---|----------|----|----|----------|---|
| NM_003001    | <i>SDHC</i>     | 0 | 0.37074057246706  | 1 | 4.00E-04 | NA | NA | 0.001    | 0 |
| NM_001035512 | <i>SDHC</i>     | 0 | 0.37074057246706  | 1 | 2.00E-04 | NA | NA | 6.00E-04 | 0 |
| NM_001035511 | <i>SDHC</i>     | 0 | 0.37074057246706  | 1 | 4.00E-04 | NA | NA | 0.001    | 0 |
| NR_103459    | <i>SDHC</i>     | 0 | 0.37074057246706  | 1 | 2.00E-04 | NA | NA | 6.00E-04 | 0 |
| NM_001689    | <i>ATP5G3</i>   | 0 | 0.37074057246706  | 1 | 2.00E-04 | NA | NA | 6.00E-04 | 0 |
| NM_001190329 | <i>ATP5G3</i>   | 0 | 0.37074057246706  | 1 | 2.00E-04 | NA | NA | 6.00E-04 | 0 |
| NM_001546    | <i>ID4</i>      | 0 | 0.371194911403907 | 1 | 2.00E-04 | NA | NA | 6.00E-04 | 0 |
| NM_001159596 | <i>BIVM</i>     | 0 | 0.371649250340754 | 1 | 2.00E-04 | NA | NA | 6.00E-04 | 0 |
| NM_017693    | <i>BIVM</i>     | 0 | 0.371649250340754 | 1 | 2.00E-04 | NA | NA | 6.00E-04 | 0 |
| NM_000462    | <i>UBE3A</i>    | 0 | 0.372103589277601 | 1 | 2.00E-04 | NA | NA | 6.00E-04 | 0 |
| NM_130839    | <i>UBE3A</i>    | 0 | 0.372103589277601 | 1 | 2.00E-04 | NA | NA | 6.00E-04 | 0 |
| NM_003253    | <i>TIAM1</i>    | 0 | 0.372103589277601 | 1 | 2.00E-04 | NA | NA | 6.00E-04 | 0 |
| NM_133489    | <i>SLC26A10</i> | 0 | 0.372557928214448 | 1 | 2.00E-04 | NA | NA | 6.00E-04 | 0 |
| NM_138435    | <i>FAM83F</i>   | 0 | 0.373466606088142 | 1 | 2.00E-04 | NA | NA | 6.00E-04 | 0 |
| NM_004034    | <i>ANXA7</i>    | 0 | 0.373920945024989 | 1 | 2.00E-04 | NA | NA | 6.00E-04 | 0 |
| NM_001156    | <i>ANXA7</i>    | 0 | 0.373920945024989 | 1 | 2.00E-04 | NA | NA | 6.00E-04 | 0 |
| NM_015526    | <i>CLIP3</i>    | 0 | 0.374375283961836 | 1 | 2.00E-04 | NA | NA | 6.00E-04 | 0 |
| NM_006560    | <i>CELF1</i>    | 0 | 0.375283961835529 | 1 | 2.00E-04 | NA | NA | 6.00E-04 | 0 |
| NM_052855    | <i>ANKRD40</i>  | 0 | 0.375283961835529 | 1 | 2.00E-04 | NA | NA | 6.00E-04 | 0 |
| NM_001145057 | <i>IL18BP</i>   | 0 | 0.37664697864607  | 1 | 2.00E-04 | NA | NA | 6.00E-04 | 0 |
| NM_001145055 | <i>IL18BP</i>   | 0 | 0.37664697864607  | 1 | 2.00E-04 | NA | NA | 6.00E-04 | 0 |
| NR_024526    | <i>ARL6IP6</i>  | 0 | 0.37664697864607  | 1 | 2.00E-04 | NA | NA | 6.00E-04 | 0 |
| NM_152522    | <i>ARL6IP6</i>  | 0 | 0.37664697864607  | 1 | 2.00E-04 | NA | NA | 6.00E-04 | 0 |
| NM_031480    | <i>RIOK1</i>    | 0 | 0.37664697864607  | 1 | 2.00E-04 | NA | NA | 6.00E-04 | 0 |
| NM_004004    | <i>GJB2</i>     | 0 | 0.37664697864607  | 1 | 2.00E-04 | NA | NA | 6.00E-04 | 0 |
| NM_001122838 | <i>NAPEPLD</i>  | 0 | 0.37664697864607  | 1 | 2.00E-04 | NA | NA | 6.00E-04 | 0 |
| NM_198990    | <i>NAPEPLD</i>  | 0 | 0.37664697864607  | 1 | 2.00E-04 | NA | NA | 6.00E-04 | 0 |
| NM_001001928 | <i>PPARA</i>    | 0 | 0.377555656519764 | 1 | 2.00E-04 | NA | NA | 6.00E-04 | 0 |
| NM_005036    | <i>PPARA</i>    | 0 | 0.377555656519764 | 1 | 2.00E-04 | NA | NA | 6.00E-04 | 0 |
| NM_144489    | <i>RGS3</i>     | 0 | 0.377555656519764 | 1 | 2.00E-04 | NA | NA | 6.00E-04 | 0 |
| NM_001276262 | <i>RGS3</i>     | 0 | 0.377555656519764 | 1 | 2.00E-04 | NA | NA | 6.00E-04 | 0 |
| NR_039872    | <i>MIR4721</i>  | 0 | 0.377555656519764 | 1 | 2.00E-04 | NA | NA | 6.00E-04 | 0 |
| NM_001199148 | <i>SLC38A11</i> | 0 | 0.377555656519764 | 1 | 2.00E-04 | NA | NA | 6.00E-04 | 0 |
| NM_173512    | <i>SLC38A11</i> | 0 | 0.377555656519764 | 1 | 2.00E-04 | NA | NA | 6.00E-04 | 0 |
| NM_002233    | <i>KCNA4</i>    | 0 | 0.378009995456611 | 1 | 2.00E-04 | NA | NA | 6.00E-04 | 0 |
| NM_000642    | <i>AGL</i>      | 0 | 0.378464334393458 | 1 | 2.00E-04 | NA | NA | 6.00E-04 | 0 |
| NM_001174138 | <i>CCK</i>      | 0 | 0.378464334393458 | 1 | 2.00E-04 | NA | NA | 6.00E-04 | 0 |
| NM_001501    | <i>GNRH2</i>    | 0 | 0.378918673330304 | 1 | 2.00E-04 | NA | NA | 6.00E-04 | 0 |
| NM_178332    | <i>GNRH2</i>    | 0 | 0.378918673330304 | 1 | 2.00E-04 | NA | NA | 6.00E-04 | 0 |
| NM_178331    | <i>GNRH2</i>    | 0 | 0.378918673330304 | 1 | 2.00E-04 | NA | NA | 6.00E-04 | 0 |
| NM_002363    | <i>MAGEB1</i>   | 0 | 0.378918673330304 | 1 | 2.00E-04 | NA | NA | 6.00E-04 | 0 |



|              |              |   |                   |   |          |    |    |          |   |
|--------------|--------------|---|-------------------|---|----------|----|----|----------|---|
| NM_177415    | MAGEB1       | 0 | 0.378918673330304 | 1 | 2.00E-04 | NA | NA | 6.00E-04 | 0 |
| NM_015975    | TAF9B        | 0 | 0.378918673330304 | 1 | 2.00E-04 | NA | NA | 6.00E-04 | 0 |
| NM_016329    | SFMBT1       | 0 | 0.379827351203998 | 1 | 2.00E-04 | NA | NA | 6.00E-04 | 0 |
| NR_039892    | MIR4738      | 0 | 0.380281690140845 | 1 | 2.00E-04 | NA | NA | 6.00E-04 | 0 |
| NM_001040424 | PRDM15       | 0 | 0.380281690140845 | 1 | 2.00E-04 | NA | NA | 6.00E-04 | 0 |
| NM_001282934 | PRDM15       | 0 | 0.380281690140845 | 1 | 2.00E-04 | NA | NA | 6.00E-04 | 0 |
| NR_104257    | PRDM15       | 0 | 0.380281690140845 | 1 | 2.00E-04 | NA | NA | 6.00E-04 | 0 |
| NR_104258    | PRDM15       | 0 | 0.380281690140845 | 1 | 2.00E-04 | NA | NA | 6.00E-04 | 0 |
| NM_022115    | PRDM15       | 0 | 0.380281690140845 | 1 | 2.00E-04 | NA | NA | 6.00E-04 | 0 |
| NM_005023    | PGGT1B       | 0 | 0.380281690140845 | 1 | 2.00E-04 | NA | NA | 6.00E-04 | 0 |
| NM_015028    | TNIK         | 0 | 0.380736029077692 | 1 | 2.00E-04 | NA | NA | 6.00E-04 | 0 |
| NM_001161560 | TNIK         | 0 | 0.380736029077692 | 1 | 2.00E-04 | NA | NA | 6.00E-04 | 0 |
| NM_001161566 | TNIK         | 0 | 0.380736029077692 | 1 | 2.00E-04 | NA | NA | 6.00E-04 | 0 |
| NM_001161565 | TNIK         | 0 | 0.380736029077692 | 1 | 2.00E-04 | NA | NA | 6.00E-04 | 0 |
| NM_001161561 | TNIK         | 0 | 0.380736029077692 | 1 | 2.00E-04 | NA | NA | 6.00E-04 | 0 |
| NM_001161563 | TNIK         | 0 | 0.380736029077692 | 1 | 2.00E-04 | NA | NA | 6.00E-04 | 0 |
| NM_001161564 | TNIK         | 0 | 0.380736029077692 | 1 | 2.00E-04 | NA | NA | 6.00E-04 | 0 |
| NM_001161562 | TNIK         | 0 | 0.380736029077692 | 1 | 2.00E-04 | NA | NA | 6.00E-04 | 0 |
| NR_027767    | TNIK         | 0 | 0.380736029077692 | 1 | 2.00E-04 | NA | NA | 6.00E-04 | 0 |
| NM_003783    | B3GALT2      | 0 | 0.381190368014539 | 1 | 2.00E-04 | NA | NA | 6.00E-04 | 0 |
| NM_014360    | NKX2-8       | 0 | 0.381190368014539 | 1 | 2.00E-04 | NA | NA | 6.00E-04 | 0 |
| NM_001165136 | HERC6        | 0 | 0.381644706951386 | 1 | 2.00E-04 | NA | NA | 6.00E-04 | 0 |
| NM_017912    | HERC6        | 0 | 0.381644706951386 | 1 | 2.00E-04 | NA | NA | 6.00E-04 | 0 |
| NM_003162    | STRN         | 0 | 0.381644706951386 | 1 | 2.00E-04 | NA | NA | 6.00E-04 | 0 |
| NM_001251905 | APPL2        | 0 | 0.382099045888233 | 1 | 2.00E-04 | NA | NA | 6.00E-04 | 0 |
| NM_001267586 | FBXW10       | 0 | 0.383007723761926 | 1 | 2.00E-04 | NA | NA | 6.00E-04 | 0 |
| NM_001267585 | FBXW10       | 0 | 0.383007723761926 | 1 | 2.00E-04 | NA | NA | 6.00E-04 | 0 |
| NR_051988    | FBXW10       | 0 | 0.383007723761926 | 1 | 2.00E-04 | NA | NA | 6.00E-04 | 0 |
| NM_001112732 | MCF2L        | 0 | 0.383462062698773 | 1 | 2.00E-04 | NA | NA | 6.00E-04 | 0 |
| NM_001007169 | ZNF483       | 0 | 0.383462062698773 | 1 | 2.00E-04 | NA | NA | 6.00E-04 | 0 |
| NM_133464    | ZNF483       | 0 | 0.383462062698773 | 1 | 2.00E-04 | NA | NA | 6.00E-04 | 0 |
| NM_030810    | TXNDC5       | 0 | 0.383462062698773 | 1 | 2.00E-04 | NA | NA | 6.00E-04 | 0 |
| NR_024443    | LOC100133920 | 0 | 0.38391640163562  | 1 | 2.00E-04 | NA | NA | 6.00E-04 | 0 |
| NM_032765    | TRIM52       | 0 | 0.38391640163562  | 1 | 2.00E-04 | NA | NA | 6.00E-04 | 0 |
| NM_001267727 | ARSG         | 0 | 0.384825079509314 | 1 | 2.00E-04 | NA | NA | 6.00E-04 | 0 |
| NM_024589    | ROGDI        | 0 | 0.384825079509314 | 1 | 2.00E-04 | NA | NA | 6.00E-04 | 0 |
| NR_046480    | ROGDI        | 0 | 0.384825079509314 | 1 | 2.00E-04 | NA | NA | 6.00E-04 | 0 |
| NR_002964    | SNORA28      | 0 | 0.386188096319855 | 1 | 2.00E-04 | NA | NA | 6.00E-04 | 0 |
| NM_001198592 | ADCY4        | 0 | 0.386642435256701 | 1 | 2.00E-04 | NA | NA | 6.00E-04 | 0 |
| NM_001198568 | ADCY4        | 0 | 0.386642435256701 | 1 | 2.00E-04 | NA | NA | 6.00E-04 | 0 |
| NM_139247    | ADCY4        | 0 | 0.386642435256701 | 1 | 2.00E-04 | NA | NA | 6.00E-04 | 0 |

|              |                   |                   |                   |        |          |    |    |          |   |
|--------------|-------------------|-------------------|-------------------|--------|----------|----|----|----------|---|
| NM_022120    | <i>OXCT2</i>      | 0                 | 0.387096774193548 | 1      | 2.00E-04 | NA | NA | 6.00E-04 | 0 |
| NR_027152    | <i>PRR26</i>      | 0.159018627896411 | 0.546115402089959 | 0.9992 | 2.00E-04 | NA | NA | 6.00E-04 | 0 |
| NM_015004    | <i>EXOSC7</i>     | 0                 | 0.388005452067242 | 1      | 2.00E-04 | NA | NA | 6.00E-04 | 0 |
| NR_023353    | <i>EXOSC7</i>     | 0                 | 0.388005452067242 | 1      | 2.00E-04 | NA | NA | 6.00E-04 | 0 |
| NM_018414    | <i>ST6GALNAC1</i> | 0                 | 0.388005452067242 | 1      | 2.00E-04 | NA | NA | 6.00E-04 | 0 |
| NM_001039165 | <i>MRGBPRE</i>    | 0                 | 0.388459791004089 | 0.9998 | 4.00E-04 | NA | NA | 0.001    | 0 |
| NM_001145670 | <i>SORBS2</i>     | 0                 | 0.388914129940936 | 1      | 2.00E-04 | NA | NA | 6.00E-04 | 0 |
| NM_003603    | <i>SORBS2</i>     | 0                 | 0.388914129940936 | 1      | 2.00E-04 | NA | NA | 6.00E-04 | 0 |
| NM_006522    | <i>WNT6</i>       | 0                 | 0.389368468877783 | 1      | 2.00E-04 | NA | NA | 6.00E-04 | 0 |
| NR_003666    | <i>SPDYE7P</i>    | 0                 | 0.389368468877783 | 1      | 2.00E-04 | NA | NA | 6.00E-04 | 0 |
| NM_001004317 | <i>LIN28B</i>     | 0.044525215810995 | 0.434348023625625 | 1      | 2.00E-04 | NA | NA | 6.00E-04 | 0 |
| NM_016166    | <i>PIAS1</i>      | 0                 | 0.38982280781463  | 1      | 2.00E-04 | NA | NA | 6.00E-04 | 0 |
| NM_001715    | <i>BLK</i>        | 0                 | 0.390277146751477 | 1      | 2.00E-04 | NA | NA | 6.00E-04 | 0 |
| NM_001039842 | <i>OXLD1</i>      | 0                 | 0.391640163562017 | 1      | 2.00E-04 | NA | NA | 6.00E-04 | 0 |
| NM_000834    | <i>GRIN2B</i>     | 0                 | 0.392094502498864 | 1      | 2.00E-04 | NA | NA | 6.00E-04 | 0 |
| NM_001033853 | <i>RPL3</i>       | 0                 | 0.392094502498864 | 1      | 2.00E-04 | NA | NA | 6.00E-04 | 0 |
| NM_000967    | <i>RPL3</i>       | 0                 | 0.392094502498864 | 1      | 2.00E-04 | NA | NA | 6.00E-04 | 0 |
| NM_134444    | <i>NLRP4</i>      | 0                 | 0.392548841435711 | 1      | 2.00E-04 | NA | NA | 6.00E-04 | 0 |
| NM_000700    | <i>ANXA1</i>      | 0                 | 0.392548841435711 | 1      | 2.00E-04 | NA | NA | 6.00E-04 | 0 |
| NM_152760    | <i>SNX32</i>      | 0                 | 0.393003180372558 | 1      | 2.00E-04 | NA | NA | 6.00E-04 | 0 |
| NM_001345    | <i>DGKA</i>       | 0                 | 0.393003180372558 | 1      | 2.00E-04 | NA | NA | 6.00E-04 | 0 |
| NM_152408    | <i>POCS</i>       | 0                 | 0.393003180372558 | 1      | 2.00E-04 | NA | NA | 6.00E-04 | 0 |
| NM_052966    | <i>FAM129A</i>    | 0                 | 0.393457519309405 | 1      | 2.00E-04 | NA | NA | 6.00E-04 | 0 |
| NM_005612    | <i>REST</i>       | 0                 | 0.393911858246252 | 1      | 2.00E-04 | NA | NA | 6.00E-04 | 0 |
| NM_130768    | <i>ASZ1</i>       | 0                 | 0.394820536119945 | 1      | 2.00E-04 | NA | NA | 6.00E-04 | 0 |
| NR_023315    | <i>ASZ1</i>       | 0                 | 0.394820536119945 | 1      | 2.00E-04 | NA | NA | 6.00E-04 | 0 |
| NM_001190919 | <i>THRA</i>       | 0                 | 0.395274875056792 | 1      | 4.00E-04 | NA | NA | 0.001    | 0 |
| NM_001190918 | <i>THRA</i>       | 0                 | 0.395274875056792 | 1      | 2.00E-04 | NA | NA | 6.00E-04 | 0 |
| NM_003250    | <i>THRA</i>       | 0                 | 0.395274875056792 | 1      | 2.00E-04 | NA | NA | 6.00E-04 | 0 |
| NM_199334    | <i>THRA</i>       | 0                 | 0.395274875056792 | 1      | 2.00E-04 | NA | NA | 6.00E-04 | 0 |
| NM_001135244 | <i>TCOF1</i>      | 0                 | 0.395274875056792 | 1      | 2.00E-04 | NA | NA | 6.00E-04 | 0 |
| NM_001135245 | <i>TCOF1</i>      | 0                 | 0.395274875056792 | 1      | 2.00E-04 | NA | NA | 6.00E-04 | 0 |
| NM_000356    | <i>TCOF1</i>      | 0                 | 0.395274875056792 | 1      | 2.00E-04 | NA | NA | 6.00E-04 | 0 |
| NM_001195141 | <i>TCOF1</i>      | 0                 | 0.395274875056792 | 1      | 2.00E-04 | NA | NA | 6.00E-04 | 0 |
| NM_001135243 | <i>TCOF1</i>      | 0                 | 0.395274875056792 | 1      | 2.00E-04 | NA | NA | 6.00E-04 | 0 |
| NM_001008657 | <i>TCOF1</i>      | 0                 | 0.395274875056792 | 1      | 2.00E-04 | NA | NA | 6.00E-04 | 0 |
| NM_003948    | <i>CDKL2</i>      | 0                 | 0.395274875056792 | 1      | 2.00E-04 | NA | NA | 6.00E-04 | 0 |
| NM_001243612 | <i>LMO3</i>       | 0                 | 0.396183552930486 | 1      | 2.00E-04 | NA | NA | 6.00E-04 | 0 |
| NM_030929    | <i>KAZALD1</i>    | 0                 | 0.397546569741027 | 1      | 2.00E-04 | NA | NA | 6.00E-04 | 0 |
| NM_002409    | <i>MGAT3</i>      | 0                 | 0.398455247614721 | 1      | 2.00E-04 | NA | NA | 6.00E-04 | 0 |
| NM_018667    | <i>SMPD3</i>      | 0                 | 0.398909586551567 | 1      | 2.00E-04 | NA | NA | 6.00E-04 | 0 |

|              |          |   |                   |        |          |    |    |          |          |
|--------------|----------|---|-------------------|--------|----------|----|----|----------|----------|
| NM_175723    | SSX5     | 0 | 0.399363925488414 | 1      | 2.00E-04 | NA | NA | 6.00E-04 | 0        |
| NM_021015    | SSX5     | 0 | 0.399363925488414 | 1      | 2.00E-04 | NA | NA | 6.00E-04 | 0        |
| NR_073393    | SSX9     | 0 | 0.399363925488414 | 1      | 2.00E-04 | NA | NA | 6.00E-04 | 0        |
| NM_015137    | EFR3A    | 0 | 0.399818264425261 | 1      | 2.00E-04 | NA | NA | 6.00E-04 | 0        |
| NM_020199    | C5orf15  | 0 | 0.401181281235802 | 1      | 2.00E-04 | NA | NA | 6.00E-04 | 0        |
| NM_001242329 | USP17L5  | 0 | 0.401635620172649 | 0.9984 | 0.0012   | NA | NA | 0.0031   | 1.00E-04 |
| NR_027279    | USP17L6P | 0 | 0.401635620172649 | 0.9994 | 2.00E-04 | NA | NA | 6.00E-04 | 0        |
| NM_001038493 | DLX1     | 0 | 0.402998636983189 | 1      | 2.00E-04 | NA | NA | 6.00E-04 | 0        |
| NM_178120    | DLX1     | 0 | 0.402998636983189 | 1      | 2.00E-04 | NA | NA | 6.00E-04 | 0        |
| NM_080391    | PTP4A2   | 0 | 0.402998636983189 | 1      | 2.00E-04 | NA | NA | 6.00E-04 | 0        |
| NM_014417    | BBC3     | 0 | 0.402998636983189 | 1      | 2.00E-04 | NA | NA | 6.00E-04 | 0        |
| NR_002981    | SNORA51  | 0 | 0.403452975920036 | 1      | 2.00E-04 | NA | NA | 6.00E-04 | 0        |
| NM_021072    | HCN1     | 0 | 0.403452975920036 | 1      | 2.00E-04 | NA | NA | 6.00E-04 | 0        |
| NM_014943    | ZHX2     | 0 | 0.40436165379373  | 1      | 2.00E-04 | NA | NA | 6.00E-04 | 0        |
| NM_001243613 | LMO3     | 0 | 0.404815992730577 | 1      | 2.00E-04 | NA | NA | 6.00E-04 | 0        |
| NM_001243610 | LMO3     | 0 | 0.404815992730577 | 1      | 2.00E-04 | NA | NA | 6.00E-04 | 0        |
| NM_018640    | LMO3     | 0 | 0.404815992730577 | 1      | 2.00E-04 | NA | NA | 6.00E-04 | 0        |
| NM_001079534 | CPEB1    | 0 | 0.404815992730577 | 1      | 2.00E-04 | NA | NA | 6.00E-04 | 0        |
| NM_001079533 | CPEB1    | 0 | 0.404815992730577 | 1      | 2.00E-04 | NA | NA | 6.00E-04 | 0        |
| NM_001079535 | CPEB1    | 0 | 0.404815992730577 | 1      | 2.00E-04 | NA | NA | 6.00E-04 | 0        |
| NM_017849    | TMEM127  | 0 | 0.404815992730577 | 1      | 2.00E-04 | NA | NA | 6.00E-04 | 0        |
| NM_001193304 | TMEM127  | 0 | 0.404815992730577 | 1      | 2.00E-04 | NA | NA | 6.00E-04 | 0        |
| NM_014840    | NUAK1    | 0 | 0.406633348477965 | 1      | 2.00E-04 | NA | NA | 6.00E-04 | 0        |
| NM_182492    | LRP5L    | 0 | 0.407087687414811 | 1      | 2.00E-04 | NA | NA | 6.00E-04 | 0        |
| NM_000773    | CYP2E1   | 0 | 0.407996365288505 | 1      | 2.00E-04 | NA | NA | 6.00E-04 | 0        |
| NM_006406    | PRDX4    | 0 | 0.408450704225352 | 1      | 2.00E-04 | NA | NA | 6.00E-04 | 0        |
| NM_004529    | MLLT3    | 0 | 0.408450704225352 | 1      | 2.00E-04 | NA | NA | 6.00E-04 | 0        |
| NM_198679    | RAPGEF1  | 0 | 0.408450704225352 | 1      | 2.00E-04 | NA | NA | 6.00E-04 | 0        |
| NM_000980    | RPL18A   | 0 | 0.409813721035893 | 1      | 2.00E-04 | NA | NA | 6.00E-04 | 0        |
| NM_018018    | SLC38A4  | 0 | 0.41026805997274  | 1      | 2.00E-04 | NA | NA | 6.00E-04 | 0        |
| NM_001143824 | SLC38A4  | 0 | 0.41026805997274  | 1      | 2.00E-04 | NA | NA | 6.00E-04 | 0        |
| NM_001130677 | C17orf96 | 0 | 0.410722398909587 | 1      | 2.00E-04 | NA | NA | 6.00E-04 | 0        |
| NM_033449    | FCHSD1   | 0 | 0.41163107678328  | 1      | 2.00E-04 | NA | NA | 6.00E-04 | 0        |
| NR_037580    | TMEM222  | 0 | 0.412994093593821 | 1      | 2.00E-04 | NA | NA | 6.00E-04 | 0        |
| NR_037577    | TMEM222  | 0 | 0.412994093593821 | 1      | 2.00E-04 | NA | NA | 6.00E-04 | 0        |
| NM_032125    | TMEM222  | 0 | 0.412994093593821 | 1      | 2.00E-04 | NA | NA | 6.00E-04 | 0        |
| NR_037576    | TMEM222  | 0 | 0.412994093593821 | 1      | 2.00E-04 | NA | NA | 6.00E-04 | 0        |
| NM_003368    | USP1     | 0 | 0.413902771467515 | 1      | 2.00E-04 | NA | NA | 6.00E-04 | 0        |
| NM_002163    | IRF8     | 0 | 0.414811449341209 | 1      | 2.00E-04 | NA | NA | 6.00E-04 | 0        |
| NR_103765    | CAND1.11 | 0 | 0.415265788278055 | 1      | 2.00E-04 | NA | NA | 6.00E-04 | 0        |
| NM_001042432 | CLN3     | 0 | 0.415265788278055 | 1      | 2.00E-04 | NA | NA | 6.00E-04 | 0        |

|              |                  |   |                   |   |          |    |    |          |   |
|--------------|------------------|---|-------------------|---|----------|----|----|----------|---|
| NM_001795    | <i>CDH5</i>      | 0 | 0.415720127214902 | 1 | 2.00E-04 | NA | NA | 6.00E-04 | 0 |
| NM_145057    | <i>CDC42EP5</i>  | 0 | 0.415720127214902 | 1 | 2.00E-04 | NA | NA | 6.00E-04 | 0 |
| NM_001099625 | <i>MTFR1L</i>    | 0 | 0.416628805088596 | 1 | 2.00E-04 | NA | NA | 6.00E-04 | 0 |
| NM_001099627 | <i>MTFR1L</i>    | 0 | 0.416628805088596 | 1 | 2.00E-04 | NA | NA | 6.00E-04 | 0 |
| NM_138712    | <i>PPARG</i>     | 0 | 0.416628805088596 | 1 | 2.00E-04 | NA | NA | 6.00E-04 | 0 |
| NM_005037    | <i>PPARG</i>     | 0 | 0.416628805088596 | 1 | 2.00E-04 | NA | NA | 6.00E-04 | 0 |
| NM_001253792 | <i>ZNF444</i>    | 0 | 0.41753748296229  | 1 | 2.00E-04 | NA | NA | 6.00E-04 | 0 |
| NM_018337    | <i>ZNF444</i>    | 0 | 0.41753748296229  | 1 | 2.00E-04 | NA | NA | 6.00E-04 | 0 |
| NM_001195752 | <i>THAP3</i>     | 0 | 0.417991821899137 | 1 | 2.00E-04 | NA | NA | 6.00E-04 | 0 |
| NM_138350    | <i>THAP3</i>     | 0 | 0.417991821899137 | 1 | 2.00E-04 | NA | NA | 6.00E-04 | 0 |
| NM_152613    | <i>WBP2NL</i>    | 0 | 0.417991821899137 | 1 | 2.00E-04 | NA | NA | 6.00E-04 | 0 |
| NM_003432    | <i>ZNF131</i>    | 0 | 0.418900499772831 | 1 | 2.00E-04 | NA | NA | 6.00E-04 | 0 |
| NR_003923    | <i>GUCY1B2</i>   | 0 | 0.419354838709677 | 1 | 2.00E-04 | NA | NA | 6.00E-04 | 0 |
| NM_005218    | <i>DEFB1</i>     | 0 | 0.419809177646524 | 1 | 2.00E-04 | NA | NA | 6.00E-04 | 0 |
| NM_001039481 | <i>ETNK1</i>     | 0 | 0.420717855520218 | 1 | 2.00E-04 | NA | NA | 6.00E-04 | 0 |
| NM_018638    | <i>ETNK1</i>     | 0 | 0.420717855520218 | 1 | 2.00E-04 | NA | NA | 6.00E-04 | 0 |
| NM_001001709 | <i>C9orf170</i>  | 0 | 0.420717855520218 | 1 | 2.00E-04 | NA | NA | 6.00E-04 | 0 |
| NM_006827    | <i>TMED10</i>    | 0 | 0.420717855520218 | 1 | 2.00E-04 | NA | NA | 6.00E-04 | 0 |
| NM_001079526 | <i>IKZF2</i>     | 0 | 0.420717855520218 | 1 | 2.00E-04 | NA | NA | 6.00E-04 | 0 |
| NR_038310    | <i>MIR497HG</i>  | 0 | 0.421172194457065 | 1 | 2.00E-04 | NA | NA | 6.00E-04 | 0 |
| NM_001113378 | <i>FANCI</i>     | 0 | 0.422989550204453 | 1 | 2.00E-04 | NA | NA | 6.00E-04 | 0 |
| NM_018193    | <i>FANCI</i>     | 0 | 0.422989550204453 | 1 | 2.00E-04 | NA | NA | 6.00E-04 | 0 |
| NM_005565    | <i>LCP2</i>      | 0 | 0.422989550204453 | 1 | 2.00E-04 | NA | NA | 6.00E-04 | 0 |
| NR_103778    | <i>FLG-AS1</i>   | 0 | 0.423443889141299 | 1 | 2.00E-04 | NA | NA | 6.00E-04 | 0 |
| NM_014786    | <i>ARHGEF17</i>  | 0 | 0.423898228078146 | 1 | 2.00E-04 | NA | NA | 6.00E-04 | 0 |
| NM_001277732 | <i>AOC3</i>      | 0 | 0.42480690595184  | 1 | 2.00E-04 | NA | NA | 6.00E-04 | 0 |
| NM_003272    | <i>GPR137B</i>   | 0 | 0.425715583825534 | 1 | 2.00E-04 | NA | NA | 6.00E-04 | 0 |
| NM_001003675 | <i>LDLRAD4</i>   | 0 | 0.426169922762381 | 1 | 2.00E-04 | NA | NA | 6.00E-04 | 0 |
| NM_001003674 | <i>LDLRAD4</i>   | 0 | 0.426169922762381 | 1 | 2.00E-04 | NA | NA | 6.00E-04 | 0 |
| NR_026932    | <i>PDCD4-AS1</i> | 0 | 0.426624261699228 | 1 | 2.00E-04 | NA | NA | 6.00E-04 | 0 |
| NM_022817    | <i>PER2</i>      | 0 | 0.429804634257156 | 1 | 2.00E-04 | NA | NA | 6.00E-04 | 0 |
| NM_020783    | <i>SYT4</i>      | 0 | 0.43071331213085  | 1 | 2.00E-04 | NA | NA | 6.00E-04 | 0 |
| NM_001282631 | <i>ARSE</i>      | 0 | 0.43071331213085  | 1 | 2.00E-04 | NA | NA | 6.00E-04 | 0 |
| NM_014053    | <i>FLVCR1</i>    | 0 | 0.431167651067697 | 1 | 2.00E-04 | NA | NA | 6.00E-04 | 0 |
| NM_175698    | <i>SSX2</i>      | 0 | 0.431167651067697 | 1 | 2.00E-04 | NA | NA | 6.00E-04 | 0 |
| NM_003147    | <i>SSX2</i>      | 0 | 0.431167651067697 | 1 | 2.00E-04 | NA | NA | 6.00E-04 | 0 |
| NM_001164417 | <i>SSX2B</i>     | 0 | 0.431167651067697 | 1 | 2.00E-04 | NA | NA | 6.00E-04 | 0 |
| NM_001278701 | <i>SSX2B</i>     | 0 | 0.431167651067697 | 1 | 2.00E-04 | NA | NA | 6.00E-04 | 0 |
| NR_002439    | <i>SNORD43</i>   | 0 | 0.431167651067697 | 1 | 2.00E-04 | NA | NA | 6.00E-04 | 0 |
| NM_004100    | <i>EYA4</i>      | 0 | 0.43207632894139  | 1 | 2.00E-04 | NA | NA | 6.00E-04 | 0 |
| NM_172103    | <i>EYA4</i>      | 0 | 0.43207632894139  | 1 | 2.00E-04 | NA | NA | 6.00E-04 | 0 |

|              |              |                     |                   |        |          |    |    |          |   |
|--------------|--------------|---------------------|-------------------|--------|----------|----|----|----------|---|
| NM_172105    | EYA4         | 0                   | 0.43207632894139  | 1      | 2.00E-04 | NA | NA | 6.00E-04 | 0 |
| NR_027440    | LOC100272217 | 0                   | 0.43207632894139  | 1      | 2.00E-04 | NA | NA | 6.00E-04 | 0 |
| NR_038979    | LOC100506207 | 0.132212630622444   | 0.566560654248069 | 1      | 2.00E-04 | NA | NA | 6.00E-04 | 0 |
| NR_038980    | LOC100506207 | 0.132212630622444   | 0.566560654248069 | 1      | 2.00E-04 | NA | NA | 6.00E-04 | 0 |
| NM_002959    | SORT1        | 0                   | 0.434802362562472 | 1      | 2.00E-04 | NA | NA | 6.00E-04 | 0 |
| NM_020147    | THAP10       | 0                   | 0.435256701499318 | 1      | 2.00E-04 | NA | NA | 6.00E-04 | 0 |
| NM_015148    | PASK         | 0.093139482053612   | 0.528850522489777 | 1      | 2.00E-04 | NA | NA | 6.00E-04 | 0 |
| NM_001252122 | PASK         | 0.093139482053612   | 0.528850522489777 | 1      | 2.00E-04 | NA | NA | 6.00E-04 | 0 |
| NM_001252119 | PASK         | 0.093139482053612   | 0.528850522489777 | 1      | 2.00E-04 | NA | NA | 6.00E-04 | 0 |
| NM_001252124 | PASK         | 0.093139482053612   | 0.528850522489777 | 1      | 2.00E-04 | NA | NA | 6.00E-04 | 0 |
| NM_201551    | NELL1        | 0                   | 0.438437074057247 | 1      | 2.00E-04 | NA | NA | 6.00E-04 | 0 |
| NM_006157    | NELL1        | 0                   | 0.438437074057247 | 1      | 2.00E-04 | NA | NA | 6.00E-04 | 0 |
| NM_015091    | FAM179B      | 0.00318037255792821 | 0.443889141299409 | 1      | 2.00E-04 | NA | NA | 6.00E-04 | 0 |
| NM_016531    | KLF3         | 0                   | 0.440708768741481 | 1      | 2.00E-04 | NA | NA | 6.00E-04 | 0 |
| NR_033828    | LOC100129931 | 0                   | 0.440708768741481 | 1      | 2.00E-04 | NA | NA | 6.00E-04 | 0 |
| NM_001205201 | TEX28        | 0                   | 0.441163107678328 | 1      | 2.00E-04 | NA | NA | 6.00E-04 | 0 |
| NM_001586    | TEX28        | 0                   | 0.441163107678328 | 1      | 2.00E-04 | NA | NA | 6.00E-04 | 0 |
| NM_005321    | HIST1H1E     | 0                   | 0.441617446615175 | 1      | 2.00E-04 | NA | NA | 6.00E-04 | 0 |
| NM_001035    | RYR2         | 0                   | 0.442526124488869 | 1      | 2.00E-04 | NA | NA | 6.00E-04 | 0 |
| NM_001987    | ETV6         | 0                   | 0.442980463425716 | 1      | 2.00E-04 | NA | NA | 6.00E-04 | 0 |
| NM_001037582 | SCD5         | 0                   | 0.444343480236256 | 1      | 2.00E-04 | NA | NA | 6.00E-04 | 0 |
| NM_024906    | SCD5         | 0                   | 0.444343480236256 | 1      | 2.00E-04 | NA | NA | 6.00E-04 | 0 |
| NM_007178    | STRAP        | 0                   | 0.444797819173103 | 1      | 2.00E-04 | NA | NA | 6.00E-04 | 0 |
| NM_080645    | COL12A1      | 0                   | 0.444797819173103 | 1      | 2.00E-04 | NA | NA | 6.00E-04 | 0 |
| NM_004370    | COL12A1      | 0                   | 0.444797819173103 | 1      | 2.00E-04 | NA | NA | 6.00E-04 | 0 |
| NR_027151    | PRR26        | 0.159018627896411   | 0.604725124943208 | 0.9998 | 2.00E-04 | NA | NA | 6.00E-04 | 0 |
| NR_024515    | APLP2        | 0                   | 0.445706497046797 | 1      | 2.00E-04 | NA | NA | 6.00E-04 | 0 |
| NR_024516    | APLP2        | 0                   | 0.445706497046797 | 1      | 2.00E-04 | NA | NA | 6.00E-04 | 0 |
| NM_001142278 | APLP2        | 0                   | 0.445706497046797 | 1      | 2.00E-04 | NA | NA | 6.00E-04 | 0 |
| NM_001642    | APLP2        | 0                   | 0.445706497046797 | 1      | 2.00E-04 | NA | NA | 6.00E-04 | 0 |
| NM_001142277 | APLP2        | 0                   | 0.445706497046797 | 1      | 2.00E-04 | NA | NA | 6.00E-04 | 0 |
| NM_001142276 | APLP2        | 0                   | 0.445706497046797 | 1      | 2.00E-04 | NA | NA | 6.00E-04 | 0 |
| NM_017803    | DUS2         | 0                   | 0.446160835983644 | 1      | 2.00E-04 | NA | NA | 6.00E-04 | 0 |
| NM_001271762 | DUS2         | 0                   | 0.446160835983644 | 1      | 2.00E-04 | NA | NA | 6.00E-04 | 0 |
| NM_001271763 | DUS2         | 0                   | 0.446160835983644 | 1      | 2.00E-04 | NA | NA | 6.00E-04 | 0 |
| NM_014789    | ZNF623       | 0                   | 0.446160835983644 | 1      | 2.00E-04 | NA | NA | 6.00E-04 | 0 |
| NM_018647    | TNFRSF19     | 0                   | 0.447978191731031 | 1      | 2.00E-04 | NA | NA | 6.00E-04 | 0 |
| NM_001204458 | TNFRSF19     | 0                   | 0.447978191731031 | 1      | 2.00E-04 | NA | NA | 6.00E-04 | 0 |
| NM_145341    | PDCD4        | 0                   | 0.449795547478419 | 1      | 2.00E-04 | NA | NA | 6.00E-04 | 0 |
| NM_001199492 | PDCD4        | 0                   | 0.449795547478419 | 1      | 2.00E-04 | NA | NA | 6.00E-04 | 0 |
| NM_014456    | PDCD4        | 0                   | 0.449795547478419 | 1      | 2.00E-04 | NA | NA | 6.00E-04 | 0 |

|              |              |   |                   |   |          |    |    |          |   |
|--------------|--------------|---|-------------------|---|----------|----|----|----------|---|
| NM_052885    | SLC2A13      | 0 | 0.450704225352113 | 1 | 2.00E-04 | NA | NA | 6.00E-04 | 0 |
| NM_018140    | CEP72        | 0 | 0.451612903225806 | 1 | 2.00E-04 | NA | NA | 6.00E-04 | 0 |
| NM_014886    | NSA2         | 0 | 0.451612903225806 | 1 | 2.00E-04 | NA | NA | 6.00E-04 | 0 |
| NM_001271665 | NSA2         | 0 | 0.451612903225806 | 1 | 2.00E-04 | NA | NA | 6.00E-04 | 0 |
| NR_073403    | NSA2         | 0 | 0.451612903225806 | 1 | 2.00E-04 | NA | NA | 6.00E-04 | 0 |
| NM_152540    | SCFD2        | 0 | 0.452975920036347 | 1 | 2.00E-04 | NA | NA | 6.00E-04 | 0 |
| NR_002975    | SNORA43      | 0 | 0.452975920036347 | 1 | 2.00E-04 | NA | NA | 6.00E-04 | 0 |
| NM_006237    | POU4F1       | 0 | 0.453430258973194 | 1 | 2.00E-04 | NA | NA | 6.00E-04 | 0 |
| NR_036484    | FEZF1-AS1    | 0 | 0.453884597910041 | 1 | 2.00E-04 | NA | NA | 6.00E-04 | 0 |
| NM_001174103 | SGK494       | 0 | 0.454338936846888 | 1 | 2.00E-04 | NA | NA | 6.00E-04 | 0 |
| NM_014680    | KIAA0100     | 0 | 0.454338936846888 | 1 | 2.00E-04 | NA | NA | 6.00E-04 | 0 |
| NM_004098    | EMX2         | 0 | 0.457519309404816 | 1 | 2.00E-04 | NA | NA | 6.00E-04 | 0 |
| NM_001165924 | EMX2         | 0 | 0.457519309404816 | 1 | 2.00E-04 | NA | NA | 6.00E-04 | 0 |
| NM_203370    | FAM212A      | 0 | 0.457519309404816 | 1 | 2.00E-04 | NA | NA | 6.00E-04 | 0 |
| NM_001193635 | DHRS4L2      | 0 | 0.45842798727851  | 1 | 2.00E-04 | NA | NA | 6.00E-04 | 0 |
| NM_004578    | RAB4A        | 0 | 0.461154020899591 | 1 | 2.00E-04 | NA | NA | 6.00E-04 | 0 |
| NR_073545    | RAB4A        | 0 | 0.461154020899591 | 1 | 2.00E-04 | NA | NA | 6.00E-04 | 0 |
| NM_001271998 | RAB4A        | 0 | 0.461154020899591 | 1 | 2.00E-04 | NA | NA | 6.00E-04 | 0 |
| NR_001281    | PCDHB18      | 0 | 0.461608359836438 | 1 | 2.00E-04 | NA | NA | 6.00E-04 | 0 |
| NM_001193636 | DHRS4L2      | 0 | 0.463425715583826 | 1 | 2.00E-04 | NA | NA | 6.00E-04 | 0 |
| NM_001193637 | DHRS4L2      | 0 | 0.463425715583826 | 1 | 2.00E-04 | NA | NA | 6.00E-04 | 0 |
| NR_039752    | MIR4526      | 0 | 0.463880054520672 | 1 | 2.00E-04 | NA | NA | 6.00E-04 | 0 |
| NM_001193508 | REST         | 0 | 0.463880054520672 | 1 | 2.00E-04 | NA | NA | 6.00E-04 | 0 |
| NM_014400    | LYPD3        | 0 | 0.463880054520672 | 1 | 2.00E-04 | NA | NA | 6.00E-04 | 0 |
| NM_152376    | UBXN10       | 0 | 0.464334393457519 | 1 | 2.00E-04 | NA | NA | 6.00E-04 | 0 |
| NR_026926    | LOC151174    | 0 | 0.464334393457519 | 1 | 2.00E-04 | NA | NA | 6.00E-04 | 0 |
| NR_026925    | LOC151174    | 0 | 0.464334393457519 | 1 | 2.00E-04 | NA | NA | 6.00E-04 | 0 |
| NR_046285    | LOC100130744 | 0 | 0.464788732394366 | 1 | 2.00E-04 | NA | NA | 6.00E-04 | 0 |
| NM_006049    | SNAPC5       | 0 | 0.464788732394366 | 1 | 2.00E-04 | NA | NA | 6.00E-04 | 0 |
| NM_002774    | KLK6         | 0 | 0.465243071331213 | 1 | 2.00E-04 | NA | NA | 6.00E-04 | 0 |
| NR_030331    | MIR600       | 0 | 0.466151749204907 | 1 | 2.00E-04 | NA | NA | 6.00E-04 | 0 |
| NM_182508    | FAM216B      | 0 | 0.467514766015448 | 1 | 2.00E-04 | NA | NA | 6.00E-04 | 0 |
| NM_014287    | NOMO1        | 0 | 0.467514766015448 | 1 | 2.00E-04 | NA | NA | 6.00E-04 | 0 |
| NM_001160264 | FEZF1        | 0 | 0.468423443889141 | 1 | 2.00E-04 | NA | NA | 6.00E-04 | 0 |
| NM_001024613 | FEZF1        | 0 | 0.468423443889141 | 1 | 2.00E-04 | NA | NA | 6.00E-04 | 0 |
| NM_001142315 | LMO2         | 0 | 0.470240799636529 | 1 | 2.00E-04 | NA | NA | 6.00E-04 | 0 |
| NM_020327    | ACVR1B       | 0 | 0.471149477510223 | 1 | 2.00E-04 | NA | NA | 6.00E-04 | 0 |
| NM_003385    | VSNL1        | 0 | 0.476147205815538 | 1 | 2.00E-04 | NA | NA | 6.00E-04 | 0 |
| NM_001038707 | CDC42SE1     | 0 | 0.476601544752385 | 1 | 2.00E-04 | NA | NA | 6.00E-04 | 0 |
| NM_020239    | CDC42SE1     | 0 | 0.476601544752385 | 1 | 2.00E-04 | NA | NA | 6.00E-04 | 0 |
| NM_016306    | DNAJB11      | 0 | 0.477964561562926 | 1 | 2.00E-04 | NA | NA | 6.00E-04 | 0 |

|              |                 |   |                   |   |          |    |    |          |   |
|--------------|-----------------|---|-------------------|---|----------|----|----|----------|---|
| NM_001142415 | <i>AIMP1</i>    | 0 | 0.477964561562926 | 1 | 2.00E-04 | NA | NA | 6.00E-04 | 0 |
| NM_004757    | <i>AIMP1</i>    | 0 | 0.477964561562926 | 1 | 2.00E-04 | NA | NA | 6.00E-04 | 0 |
| NM_001040283 | <i>DMRTC2</i>   | 0 | 0.479327578373467 | 1 | 2.00E-04 | NA | NA | 6.00E-04 | 0 |
| NM_001172478 | <i>RRM2B</i>    | 0 | 0.479327578373467 | 1 | 2.00E-04 | NA | NA | 6.00E-04 | 0 |
| NM_001172477 | <i>RRM2B</i>    | 0 | 0.479327578373467 | 1 | 2.00E-04 | NA | NA | 6.00E-04 | 0 |
| NM_015713    | <i>RRM2B</i>    | 0 | 0.479327578373467 | 1 | 2.00E-04 | NA | NA | 6.00E-04 | 0 |
| NM_017655    | <i>GIPC2</i>    | 0 | 0.481144934120854 | 1 | 2.00E-04 | NA | NA | 6.00E-04 | 0 |
| NM_144585    | <i>SLC22A12</i> | 0 | 0.482053611994548 | 1 | 2.00E-04 | NA | NA | 6.00E-04 | 0 |
| NM_153378    | <i>SLC22A12</i> | 0 | 0.482053611994548 | 1 | 2.00E-04 | NA | NA | 6.00E-04 | 0 |
| NM_001276327 | <i>SLC22A12</i> | 0 | 0.482053611994548 | 1 | 2.00E-04 | NA | NA | 6.00E-04 | 0 |
| NM_001276326 | <i>SLC22A12</i> | 0 | 0.482053611994548 | 1 | 2.00E-04 | NA | NA | 6.00E-04 | 0 |
| NM_017533    | <i>MYH4</i>     | 0 | 0.483416628805089 | 1 | 2.00E-04 | NA | NA | 6.00E-04 | 0 |
| NM_001164811 | <i>PET117</i>   | 0 | 0.485688323489323 | 1 | 2.00E-04 | NA | NA | 6.00E-04 | 0 |
| NM_015072    | <i>TLL5</i>     | 0 | 0.486597001363017 | 1 | 2.00E-04 | NA | NA | 6.00E-04 | 0 |
| NM_152704    | <i>AMER2</i>    | 0 | 0.487960018173557 | 1 | 2.00E-04 | NA | NA | 6.00E-04 | 0 |
| NM_199138    | <i>AMER2</i>    | 0 | 0.487960018173557 | 1 | 2.00E-04 | NA | NA | 6.00E-04 | 0 |
| NM_001256236 | <i>PGAP2</i>    | 0 | 0.493866424352567 | 1 | 2.00E-04 | NA | NA | 6.00E-04 | 0 |
| NR_045923    | <i>PGAP2</i>    | 0 | 0.493866424352567 | 1 | 2.00E-04 | NA | NA | 6.00E-04 | 0 |
| NM_001145438 | <i>PGAP2</i>    | 0 | 0.493866424352567 | 1 | 2.00E-04 | NA | NA | 6.00E-04 | 0 |
| NM_001256235 | <i>PGAP2</i>    | 0 | 0.493866424352567 | 1 | 2.00E-04 | NA | NA | 6.00E-04 | 0 |
| NM_001256237 | <i>PGAP2</i>    | 0 | 0.493866424352567 | 1 | 2.00E-04 | NA | NA | 6.00E-04 | 0 |
| NR_027017    | <i>PGAP2</i>    | 0 | 0.493866424352567 | 1 | 2.00E-04 | NA | NA | 6.00E-04 | 0 |
| NR_045927    | <i>PGAP2</i>    | 0 | 0.493866424352567 | 1 | 2.00E-04 | NA | NA | 6.00E-04 | 0 |
| NR_045926    | <i>PGAP2</i>    | 0 | 0.493866424352567 | 1 | 2.00E-04 | NA | NA | 6.00E-04 | 0 |
| NR_045925    | <i>PGAP2</i>    | 0 | 0.493866424352567 | 1 | 2.00E-04 | NA | NA | 6.00E-04 | 0 |
| NM_001283038 | <i>PGAP2</i>    | 0 | 0.493866424352567 | 1 | 2.00E-04 | NA | NA | 6.00E-04 | 0 |
| NM_001283039 | <i>PGAP2</i>    | 0 | 0.493866424352567 | 1 | 2.00E-04 | NA | NA | 6.00E-04 | 0 |
| NM_001283040 | <i>PGAP2</i>    | 0 | 0.493866424352567 | 1 | 2.00E-04 | NA | NA | 6.00E-04 | 0 |
| NR_104270    | <i>PGAP2</i>    | 0 | 0.493866424352567 | 1 | 2.00E-04 | NA | NA | 6.00E-04 | 0 |
| NR_104271    | <i>PGAP2</i>    | 0 | 0.493866424352567 | 1 | 2.00E-04 | NA | NA | 6.00E-04 | 0 |
| NM_001273    | <i>CHD4</i>     | 0 | 0.493866424352567 | 1 | 2.00E-04 | NA | NA | 6.00E-04 | 0 |
| NM_014978    | <i>SORCS3</i>   | 0 | 0.494320763289414 | 1 | 2.00E-04 | NA | NA | 6.00E-04 | 0 |
| NR_033933    | <i>GOLGA8T</i>  | 0 | 0.494320763289414 | 1 | 2.00E-04 | NA | NA | 6.00E-04 | 0 |
| NM_001282412 | <i>PPP1R7</i>   | 0 | 0.494320763289414 | 1 | 2.00E-04 | NA | NA | 6.00E-04 | 0 |
| NM_001282414 | <i>PPP1R7</i>   | 0 | 0.494320763289414 | 1 | 2.00E-04 | NA | NA | 6.00E-04 | 0 |
| NM_001282413 | <i>PPP1R7</i>   | 0 | 0.494320763289414 | 1 | 2.00E-04 | NA | NA | 6.00E-04 | 0 |
| NM_001243386 | <i>PARVB</i>    | 0 | 0.497501135847342 | 1 | 2.00E-04 | NA | NA | 6.00E-04 | 0 |
| NM_174928    | <i>N6AMT2</i>   | 0 | 0.497501135847342 | 1 | 2.00E-04 | NA | NA | 6.00E-04 | 0 |
| NM_030919    | <i>FAM83D</i>   | 0 | 0.502498864152658 | 1 | 2.00E-04 | NA | NA | 6.00E-04 | 0 |
| NM_001135652 | <i>EIF2AK2</i>  | 0 | 0.505224897773739 | 1 | 2.00E-04 | NA | NA | 6.00E-04 | 0 |
| NM_001017416 | <i>USP1</i>     | 0 | 0.506133575647433 | 1 | 2.00E-04 | NA | NA | 6.00E-04 | 0 |

|              |                     |   |                   |   |          |    |    |          |   |
|--------------|---------------------|---|-------------------|---|----------|----|----|----------|---|
| NM_001017415 | <i>USP1</i>         | 0 | 0.506133575647433 | 1 | 2.00E-04 | NA | NA | 6.00E-04 | 0 |
| NM_182626    | <i>C2orf48</i>      | 0 | 0.506133575647433 | 1 | 2.00E-04 | NA | NA | 6.00E-04 | 0 |
| NM_006403    | <i>NEDD9</i>        | 0 | 0.506133575647433 | 1 | 2.00E-04 | NA | NA | 6.00E-04 | 0 |
| NM_182966    | <i>NEDD9</i>        | 0 | 0.506133575647433 | 1 | 2.00E-04 | NA | NA | 6.00E-04 | 0 |
| NM_001271033 | <i>NEDD9</i>        | 0 | 0.506133575647433 | 1 | 2.00E-04 | NA | NA | 6.00E-04 | 0 |
| NM_182594    | <i>ZNF454</i>       | 0 | 0.507042253521127 | 1 | 2.00E-04 | NA | NA | 6.00E-04 | 0 |
| NM_001178090 | <i>ZNF454</i>       | 0 | 0.507042253521127 | 1 | 2.00E-04 | NA | NA | 6.00E-04 | 0 |
| NM_001178089 | <i>ZNF454</i>       | 0 | 0.507042253521127 | 1 | 2.00E-04 | NA | NA | 6.00E-04 | 0 |
| NM_004551    | <i>NDUFS3</i>       | 0 | 0.507496592457974 | 1 | 2.00E-04 | NA | NA | 6.00E-04 | 0 |
| NM_001195753 | <i>THAP3</i>        | 0 | 0.508405270331667 | 1 | 2.00E-04 | NA | NA | 6.00E-04 | 0 |
| NM_001079538 | <i>XAGE2B</i>       | 0 | 0.509313948205361 | 1 | 2.00E-04 | NA | NA | 6.00E-04 | 0 |
| NM_000955    | <i>PTGER1</i>       | 0 | 0.510222626079055 | 1 | 2.00E-04 | NA | NA | 6.00E-04 | 0 |
| NM_001901    | <i>CTGF</i>         | 0 | 0.510676965015902 | 1 | 2.00E-04 | NA | NA | 6.00E-04 | 0 |
| NM_001394    | <i>DUSP4</i>        | 0 | 0.511131303952749 | 1 | 2.00E-04 | NA | NA | 6.00E-04 | 0 |
| NM_015401    | <i>HDAC7</i>        | 0 | 0.513402998636983 | 1 | 2.00E-04 | NA | NA | 6.00E-04 | 0 |
| NM_001098416 | <i>HDAC7</i>        | 0 | 0.513402998636983 | 1 | 2.00E-04 | NA | NA | 6.00E-04 | 0 |
| NM_017544    | <i>NKRF</i>         | 0 | 0.514766015447524 | 1 | 2.00E-04 | NA | NA | 6.00E-04 | 0 |
| NM_001173487 | <i>NKRF</i>         | 0 | 0.514766015447524 | 1 | 2.00E-04 | NA | NA | 6.00E-04 | 0 |
| NM_015372    | <i>C22orf24</i>     | 0 | 0.517492049068605 | 1 | 2.00E-04 | NA | NA | 6.00E-04 | 0 |
| NM_001199303 | <i>CNOT2</i>        | 0 | 0.522035438437074 | 1 | 2.00E-04 | NA | NA | 6.00E-04 | 0 |
| NR_037615    | <i>CNOT2</i>        | 0 | 0.522035438437074 | 1 | 2.00E-04 | NA | NA | 6.00E-04 | 0 |
| NM_184041    | <i>ALDOA</i>        | 0 | 0.525670149931849 | 1 | 2.00E-04 | NA | NA | 6.00E-04 | 0 |
| NM_001243177 | <i>ALDOA</i>        | 0 | 0.525670149931849 | 1 | 2.00E-04 | NA | NA | 6.00E-04 | 0 |
| NM_152990    | <i>PXT1</i>         | 0 | 0.52703316674239  | 1 | 2.00E-04 | NA | NA | 6.00E-04 | 0 |
| NM_198837    | <i>ACACA</i>        | 0 | 0.528850522489777 | 1 | 2.00E-04 | NA | NA | 6.00E-04 | 0 |
| NM_198838    | <i>ACACA</i>        | 0 | 0.528850522489777 | 1 | 2.00E-04 | NA | NA | 6.00E-04 | 0 |
| NR_029378    | <i>LOC100289511</i> | 0 | 0.530213539300318 | 1 | 2.00E-04 | NA | NA | 6.00E-04 | 0 |
| NM_006319    | <i>CDIPT</i>        | 0 | 0.531122217174012 | 1 | 2.00E-04 | NA | NA | 6.00E-04 | 0 |
| NM_001144758 | <i>PHLDB1</i>       | 0 | 0.532030895047706 | 1 | 2.00E-04 | NA | NA | 6.00E-04 | 0 |
| NM_001144759 | <i>PHLDB1</i>       | 0 | 0.532030895047706 | 1 | 2.00E-04 | NA | NA | 6.00E-04 | 0 |
| NM_001282410 | <i>PPP1R7</i>       | 0 | 0.532939572921399 | 1 | 2.00E-04 | NA | NA | 6.00E-04 | 0 |
| NM_001282411 | <i>PPP1R7</i>       | 0 | 0.532939572921399 | 1 | 2.00E-04 | NA | NA | 6.00E-04 | 0 |
| NM_001282409 | <i>PPP1R7</i>       | 0 | 0.532939572921399 | 1 | 2.00E-04 | NA | NA | 6.00E-04 | 0 |
| NM_002712    | <i>PPP1R7</i>       | 0 | 0.532939572921399 | 1 | 2.00E-04 | NA | NA | 6.00E-04 | 0 |
| NM_001142316 | <i>LMO2</i>         | 0 | 0.532939572921399 | 1 | 2.00E-04 | NA | NA | 6.00E-04 | 0 |
| NR_037776    | <i>WBSCR22</i>      | 0 | 0.533393911858246 | 1 | 2.00E-04 | NA | NA | 6.00E-04 | 0 |
| NM_001202560 | <i>WBSCR22</i>      | 0 | 0.533393911858246 | 1 | 2.00E-04 | NA | NA | 6.00E-04 | 0 |
| NR_045512    | <i>WBSCR22</i>      | 0 | 0.533393911858246 | 1 | 2.00E-04 | NA | NA | 6.00E-04 | 0 |
| NM_017528    | <i>WBSCR22</i>      | 0 | 0.533393911858246 | 1 | 2.00E-04 | NA | NA | 6.00E-04 | 0 |
| NM_001103184 | <i>FMN1</i>         | 0 | 0.533393911858246 | 1 | 2.00E-04 | NA | NA | 6.00E-04 | 0 |
| NM_003924    | <i>PHOX2B</i>       | 0 | 0.537482962289868 | 1 | 2.00E-04 | NA | NA | 6.00E-04 | 0 |



|              |                  |                    |                   |   |          |    |    |          |   |
|--------------|------------------|--------------------|-------------------|---|----------|----|----|----------|---|
| NM_001002916 | <i>H2BFWT</i>    | 0                  | 0.539754656974103 | 1 | 2.00E-04 | NA | NA | 6.00E-04 | 0 |
| NR_024347    | <i>LINC00304</i> | 0                  | 0.543389368468878 | 1 | 2.00E-04 | NA | NA | 6.00E-04 | 0 |
| NM_001097622 | <i>OCM</i>       | 0                  | 0.551567469332122 | 1 | 2.00E-04 | NA | NA | 6.00E-04 | 0 |
| NM_012244    | <i>SLC7A8</i>    | 0                  | 0.558382553384825 | 1 | 2.00E-04 | NA | NA | 6.00E-04 | 0 |
| NM_170610    | <i>HIST1H2BA</i> | 0.0218082689686506 | 0.580645161290323 | 1 | 2.00E-04 | NA | NA | 6.00E-04 | 0 |
| NM_173506    | <i>LYPD4</i>     | 0                  | 0.56065424806906  | 1 | 2.00E-04 | NA | NA | 6.00E-04 | 0 |
| NM_014755    | <i>SERTAD2</i>   | 0                  | 0.561562925942753 | 1 | 2.00E-04 | NA | NA | 6.00E-04 | 0 |
| NM_005924    | <i>MEOX2</i>     | 0                  | 0.561562925942753 | 1 | 2.00E-04 | NA | NA | 6.00E-04 | 0 |
| NR_037699    | <i>SAFB</i>      | 0                  | 0.568378009995457 | 1 | 2.00E-04 | NA | NA | 6.00E-04 | 0 |
| NM_002967    | <i>SAFB</i>      | 0                  | 0.568378009995457 | 1 | 2.00E-04 | NA | NA | 6.00E-04 | 0 |
| NM_001201340 | <i>SAFB</i>      | 0                  | 0.568378009995457 | 1 | 2.00E-04 | NA | NA | 6.00E-04 | 0 |
| NM_001201338 | <i>SAFB</i>      | 0                  | 0.568378009995457 | 1 | 2.00E-04 | NA | NA | 6.00E-04 | 0 |
| NM_001201339 | <i>SAFB</i>      | 0                  | 0.568378009995457 | 1 | 2.00E-04 | NA | NA | 6.00E-04 | 0 |
| NM_001145158 | <i>HBS1L</i>     | 0                  | 0.570195365742844 | 1 | 2.00E-04 | NA | NA | 6.00E-04 | 0 |
| NM_006620    | <i>HBS1L</i>     | 0                  | 0.570195365742844 | 1 | 2.00E-04 | NA | NA | 6.00E-04 | 0 |
| NM_001145207 | <i>HBS1L</i>     | 0                  | 0.570195365742844 | 1 | 2.00E-04 | NA | NA | 6.00E-04 | 0 |
| NM_014515    | <i>CNOT2</i>     | 0                  | 0.574284416174466 | 1 | 2.00E-04 | NA | NA | 6.00E-04 | 0 |
| NM_001199302 | <i>CNOT2</i>     | 0                  | 0.574284416174466 | 1 | 2.00E-04 | NA | NA | 6.00E-04 | 0 |
| NM_006150    | <i>PRICKLE3</i>  | 0                  | 0.577464788732394 | 1 | 2.00E-04 | NA | NA | 6.00E-04 | 0 |
| NR_003003    | <i>SCARNA17</i>  | 0                  | 0.577919127669241 | 1 | 2.00E-04 | NA | NA | 6.00E-04 | 0 |
| NM_001122961 | <i>C1orf194</i>  | 0                  | 0.580190822353476 | 1 | 2.00E-04 | NA | NA | 6.00E-04 | 0 |
| NM_004745    | <i>DLGAP2</i>    | 0                  | 0.58246251703771  | 1 | 2.00E-04 | NA | NA | 6.00E-04 | 0 |
| NM_001277161 | <i>DLGAP2</i>    | 0                  | 0.58246251703771  | 1 | 2.00E-04 | NA | NA | 6.00E-04 | 0 |
| NM_001025108 | <i>AFF3</i>      | 0                  | 0.58246251703771  | 1 | 2.00E-04 | NA | NA | 6.00E-04 | 0 |
| NM_172242    | <i>SPAG6</i>     | 0                  | 0.584734211721945 | 1 | 2.00E-04 | NA | NA | 6.00E-04 | 0 |
| NM_001253855 | <i>SPAG6</i>     | 0                  | 0.584734211721945 | 1 | 2.00E-04 | NA | NA | 6.00E-04 | 0 |
| NM_001253854 | <i>SPAG6</i>     | 0                  | 0.584734211721945 | 1 | 2.00E-04 | NA | NA | 6.00E-04 | 0 |
| NM_012443    | <i>SPAG6</i>     | 0                  | 0.584734211721945 | 1 | 2.00E-04 | NA | NA | 6.00E-04 | 0 |
| NR_027000    | <i>LINC00965</i> | 0                  | 0.587460245343026 | 1 | 2.00E-04 | NA | NA | 6.00E-04 | 0 |
| NM_016131    | <i>RAB10</i>     | 0                  | 0.59563834620627  | 1 | 2.00E-04 | NA | NA | 6.00E-04 | 0 |
| NM_001105513 | <i>TTC21A</i>    | 0                  | 0.599727396637892 | 1 | 2.00E-04 | NA | NA | 6.00E-04 | 0 |
| NM_145755    | <i>TTC21A</i>    | 0                  | 0.599727396637892 | 1 | 2.00E-04 | NA | NA | 6.00E-04 | 0 |
| NR_034086    | <i>LOC648987</i> | 0                  | 0.600636074511586 | 1 | 2.00E-04 | NA | NA | 6.00E-04 | 0 |
| NR_034085    | <i>LOC648987</i> | 0                  | 0.600636074511586 | 1 | 2.00E-04 | NA | NA | 6.00E-04 | 0 |
| NM_004369    | <i>COL6A3</i>    | 0                  | 0.615629259427533 | 1 | 2.00E-04 | NA | NA | 6.00E-04 | 0 |
| NM_057164    | <i>COL6A3</i>    | 0                  | 0.615629259427533 | 1 | 2.00E-04 | NA | NA | 6.00E-04 | 0 |
| NM_057165    | <i>COL6A3</i>    | 0                  | 0.615629259427533 | 1 | 2.00E-04 | NA | NA | 6.00E-04 | 0 |
| NM_057166    | <i>COL6A3</i>    | 0                  | 0.615629259427533 | 1 | 2.00E-04 | NA | NA | 6.00E-04 | 0 |
| NM_057167    | <i>COL6A3</i>    | 0                  | 0.615629259427533 | 1 | 2.00E-04 | NA | NA | 6.00E-04 | 0 |
| NM_053001    | <i>OSR2</i>      | 0                  | 0.642435256701499 | 1 | 2.00E-04 | NA | NA | 6.00E-04 | 0 |
| NM_001142462 | <i>OSR2</i>      | 0                  | 0.642435256701499 | 1 | 2.00E-04 | NA | NA | 6.00E-04 | 0 |

|              |                   |   |                   |   |          |    |    |          |   |
|--------------|-------------------|---|-------------------|---|----------|----|----|----------|---|
| NM_001256312 | <i>STK3</i>       | 0 | 0.643343934575193 | 1 | 2.00E-04 | NA | NA | 6.00E-04 | 0 |
| NM_001184898 | <i>PHF8</i>       | 0 | 0.643343934575193 | 1 | 2.00E-04 | NA | NA | 6.00E-04 | 0 |
| NR_102741    | <i>LINC01024</i>  | 0 | 0.652885052248978 | 1 | 2.00E-04 | NA | NA | 6.00E-04 | 0 |
| NR_102740    | <i>LINC01024</i>  | 0 | 0.652885052248978 | 1 | 2.00E-04 | NA | NA | 6.00E-04 | 0 |
| NR_102739    | <i>LINC01024</i>  | 0 | 0.652885052248978 | 1 | 2.00E-04 | NA | NA | 6.00E-04 | 0 |
| NM_004503    | <i>HOXC6</i>      | 0 | 0.66424352567015  | 1 | 2.00E-04 | NA | NA | 6.00E-04 | 0 |
| NM_002250    | <i>KCNN4</i>      | 0 | 0.683780099954566 | 1 | 2.00E-04 | NA | NA | 6.00E-04 | 0 |
| NM_001271318 | <i>ZNF512</i>     | 0 | 0.731940027260336 | 1 | 2.00E-04 | NA | NA | 6.00E-04 | 0 |
| NM_032434    | <i>ZNF512</i>     | 0 | 0.731940027260336 | 1 | 2.00E-04 | NA | NA | 6.00E-04 | 0 |
| NM_001271288 | <i>ZNF512</i>     | 0 | 0.731940027260336 | 1 | 2.00E-04 | NA | NA | 6.00E-04 | 0 |
| NM_001271287 | <i>ZNF512</i>     | 0 | 0.731940027260336 | 1 | 2.00E-04 | NA | NA | 6.00E-04 | 0 |
| NM_001271289 | <i>ZNF512</i>     | 0 | 0.731940027260336 | 1 | 2.00E-04 | NA | NA | 6.00E-04 | 0 |
| NM_001271286 | <i>ZNF512</i>     | 0 | 0.731940027260336 | 1 | 2.00E-04 | NA | NA | 6.00E-04 | 0 |
| NR_103538    | <i>C6orf100</i>   | 0 | 0.761017719218537 | 1 | 2.00E-04 | NA | NA | 6.00E-04 | 0 |
| NR_027259    | <i>RBM12B-AS1</i> | 0 | 0.787369377555657 | 1 | 2.00E-04 | NA | NA | 6.00E-04 | 0 |
| NM_001204197 | <i>NBEA</i>       | 0 | 0.95184007269423  | 1 | 2.00E-04 | NA | NA | 6.00E-04 | 0 |

Table S2: Methylation data showing differential methylated transcripts between SAT and OVAT in obese subjects expressed by a ratio of hyper- and hypo-methylation per promoter. *fdr/FDR*= false discovery rate.

Supplementary Table 3

**Methylation in SAT non-obese vs. obese**

| Transcript   | GeneName        | sc_in_obese       | sc_in_non-obese   | p_value_in_obese | p_value_in_non-obese | fdr_in_obese | Fdr_in_obese | fdr_in_non-obese | Fdr_in_non-obese |
|--------------|-----------------|-------------------|-------------------|------------------|----------------------|--------------|--------------|------------------|------------------|
| NR_103466    | <i>NBPF13P</i>  | 1                 | 0                 | 2.00E-04         | 1                    | 0.0014       | 0            | NA               | NA               |
| NR_000016    | <i>SNORD36C</i> | 0.955474784189005 | 0                 | 2.00E-04         | 1                    | 0.0014       | 0            | NA               | NA               |
| NM_001099338 | <i>NUTM2A</i>   | 0.935483870967742 | 0                 | 2.00E-04         | 1                    | 0.0014       | 0            | NA               | NA               |
| NM_001037331 | <i>SMIM21</i>   | 0.927760109041345 | 0                 | 2.00E-04         | 1                    | 0.0014       | 0            | NA               | NA               |
| NR_003506    | <i>PLGLA</i>    | 0.89641072239891  | 0                 | 2.00E-04         | 1                    | 0.0014       | 0            | NA               | NA               |
| NM_004009    | <i>DMD</i>      | 0.882326215356656 | 0                 | 2.00E-04         | 1                    | 0.0014       | 0            | NA               | NA               |
| NM_004010    | <i>DMD</i>      | 0.882326215356656 | 0                 | 2.00E-04         | 1                    | 0.0014       | 0            | NA               | NA               |
| NM_001278495 | <i>NUTM2B</i>   | 0.864152657882781 | 0                 | 2.00E-04         | 1                    | 0.0014       | 0            | NA               | NA               |
| NM_001281429 | <i>PCED1B</i>   | 0.848250795093139 | 0                 | 2.00E-04         | 1                    | 0.0014       | 0            | NA               | NA               |
| NM_138371    | <i>PCED1B</i>   | 0.848250795093139 | 0                 | 2.00E-04         | 1                    | 0.0014       | 0            | NA               | NA               |
| NM_014717    | <i>ZNF536</i>   | 0.847796456156293 | 0                 | 2.00E-04         | 1                    | 0.0014       | 0            | NA               | NA               |
| NM_001004697 | <i>OR2T5</i>    | 0.846433439345752 | 0                 | 2.00E-04         | 1                    | 0.0014       | 0            | NA               | NA               |
| NM_002665    | <i>PLGLB2</i>   | 0.77373920945025  | 0                 | 2.00E-04         | 1                    | 0.0014       | 0            | NA               | NA               |
| NM_001032392 | <i>PLGLB1</i>   | 0.77373920945025  | 0                 | 2.00E-04         | 1                    | 0.0014       | 0            | NA               | NA               |
| NM_020436    | <i>SALL4</i>    | 0.762835074965925 | 0                 | 2.00E-04         | 1                    | 0.0014       | 0            | NA               | NA               |
| NM_001004719 | <i>OR4M2</i>    | 0.744661517492049 | 0                 | 2.00E-04         | 1                    | 0.0014       | 0            | NA               | NA               |
| NM_020987    | <i>ANK3</i>     | 0.742844161744662 | 0                 | 2.00E-04         | 1                    | 0.0014       | 0            | NA               | NA               |
| NM_133637    | <i>DQX1</i>     | 0.733303044070877 | 0                 | 2.00E-04         | 1                    | 0.0014       | 0            | NA               | NA               |
| NM_001145672 | <i>SORBS2</i>   | 0.729213993639255 | 0                 | 2.00E-04         | 1                    | 0.0014       | 0            | NA               | NA               |
| NM_001177704 | <i>FREM1</i>    | 0.722853248523398 | 0                 | 2.00E-04         | 1                    | 0.0014       | 0            | NA               | NA               |
| NM_001005495 | <i>OR2T3</i>    | 0.714220808723308 | 0                 | 2.00E-04         | 1                    | 0.0014       | 0            | NA               | NA               |
| NM_001258211 | <i>FBXO16</i>   | 0.698773284870513 | 0                 | 2.00E-04         | 1                    | 0.0014       | 0            | NA               | NA               |
| NM_172366    | <i>FBXO16</i>   | 0.698773284870513 | 0                 | 2.00E-04         | 1                    | 0.0014       | 0            | NA               | NA               |
| NM_145312    | <i>ZNF485</i>   | 0.696955929123126 | 0                 | 2.00E-04         | 1                    | 0.0014       | 0            | NA               | NA               |
| NM_015025    | <i>MYT1L</i>    | 0.693321217628351 | 0                 | 2.00E-04         | 1                    | 0.0014       | 0            | NA               | NA               |
| NM_022728    | <i>NEUROD6</i>  | 0.690595184007269 | 0                 | 2.00E-04         | 1                    | 0.0014       | 0            | NA               | NA               |
| NM_001122731 | <i>MICAL3</i>   | 0.685143116765107 | 0                 | 2.00E-04         | 1                    | 0.0014       | 0            | NA               | NA               |
| NM_001136004 | <i>MICAL3</i>   | 0.685143116765107 | 0                 | 2.00E-04         | 1                    | 0.0014       | 0            | NA               | NA               |
| NM_178556    | <i>TRIML1</i>   | 0.683325761017719 | 0                 | 2.00E-04         | 1                    | 0.0014       | 0            | NA               | NA               |
| NM_001145671 | <i>SORBS2</i>   | 0.683325761017719 | 0                 | 2.00E-04         | 1                    | 0.0014       | 0            | NA               | NA               |
| NM_002187    | <i>IL12B</i>    | 0.683325761017719 | 0                 | 2.00E-04         | 1                    | 0.0014       | 0            | NA               | NA               |
| NM_144575    | <i>CAPN13</i>   | 0.67878237164925  | 0                 | 2.00E-04         | 1                    | 0.0014       | 0            | NA               | NA               |
| NM_005454    | <i>CER1</i>     | 0.678328032712403 | 0                 | 2.00E-04         | 1                    | 0.0014       | 0            | NA               | NA               |
| NR_002448    | <i>SNORD36A</i> | 0.778282598818719 | 0.104043616537937 | 2.00E-04         | 1                    | 0.0014       | 0            | NA               | NA               |
| NM_003915    | <i>CPNE1</i>    | 0.673784643343935 | 0                 | 2.00E-04         | 1                    | 0.0014       | 0            | NA               | NA               |
| NM_152536    | <i>FGD5</i>     | 0.66424352567015  | 0                 | 2.00E-04         | 1                    | 0.0014       | 0            | NA               | NA               |
| NM_152284    | <i>CHMP4C</i>   | 0.662880508859609 | 0                 | 2.00E-04         | 1                    | 0.0014       | 0            | NA               | NA               |
| NM_001159484 | <i>NUP210L</i>  | 0.661517492049069 | 0                 | 2.00E-04         | 1                    | 0.0014       | 0            | NA               | NA               |
| NM_207308    | <i>NUP210L</i>  | 0.661517492049069 | 0                 | 2.00E-04         | 1                    | 0.0014       | 0            | NA               | NA               |
| NM_001251    | <i>CD68</i>     | 0.651976374375284 | 0                 | 2.00E-04         | 1                    | 0.0014       | 0            | NA               | NA               |

|              |             |                   |   |          |   |        |   |    |    |
|--------------|-------------|-------------------|---|----------|---|--------|---|----|----|
| NM_001040059 | CD68        | 0.651522035438437 | 0 | 2.00E-04 | 1 | 0.0014 | 0 | NA | NA |
| NM_181504    | PIK3R1      | 0.651522035438437 | 0 | 2.00E-04 | 1 | 0.0014 | 0 | NA | NA |
| NM_001145049 | GPN1        | 0.642889595638346 | 0 | 2.00E-04 | 1 | 0.0014 | 0 | NA | NA |
| NM_001145048 | GPN1        | 0.642889595638346 | 0 | 2.00E-04 | 1 | 0.0014 | 0 | NA | NA |
| NM_001145047 | GPN1        | 0.642889595638346 | 0 | 2.00E-04 | 1 | 0.0014 | 0 | NA | NA |
| NR_045125    | HIST1H2APS1 | 0.642889595638346 | 0 | 2.00E-04 | 1 | 0.0014 | 0 | NA | NA |
| NR_033738    | LOC440300   | 0.635165833711949 | 0 | 2.00E-04 | 1 | 0.0014 | 0 | NA | NA |
| NM_001164464 | TRIM43B     | 0.635165833711949 | 0 | 2.00E-04 | 1 | 0.0014 | 0 | NA | NA |
| NM_153208    | IQCK        | 0.634257155838255 | 0 | 2.00E-04 | 1 | 0.0014 | 0 | NA | NA |
| NM_030582    | COL18A1     | 0.628350749659246 | 0 | 2.00E-04 | 1 | 0.0014 | 0 | NA | NA |
| NM_001099435 | SPDYE5      | 0.61608359836438  | 0 | 2.00E-04 | 1 | 0.0014 | 0 | NA | NA |
| NM_175722    | TPO         | 0.614720581553839 | 0 | 2.00E-04 | 1 | 0.0014 | 0 | NA | NA |
| NM_175721    | TPO         | 0.614720581553839 | 0 | 2.00E-04 | 1 | 0.0014 | 0 | NA | NA |
| NM_033425    | DIXDC1      | 0.613811903680145 | 0 | 2.00E-04 | 1 | 0.0014 | 0 | NA | NA |
| NM_080918    | DGUOK       | 0.609268514311677 | 0 | 2.00E-04 | 1 | 0.0014 | 0 | NA | NA |
| NM_080916    | DGUOK       | 0.609268514311677 | 0 | 2.00E-04 | 1 | 0.0014 | 0 | NA | NA |
| NM_001164347 | ZBTB20      | 0.606542480690595 | 0 | 2.00E-04 | 1 | 0.0014 | 0 | NA | NA |
| NM_000949    | PRLR        | 0.606088141753748 | 0 | 2.00E-04 | 1 | 0.0014 | 0 | NA | NA |
| NM_001160036 | RHOBTB2     | 0.601090413448433 | 0 | 2.00E-04 | 1 | 0.0014 | 0 | NA | NA |
| NM_001099692 | EIF5AL1     | 0.599273057701045 | 0 | 2.00E-04 | 1 | 0.0014 | 0 | NA | NA |
| NM_006403    | NEDD9       | 0.595184007269423 | 0 | 2.00E-04 | 1 | 0.0014 | 0 | NA | NA |
| NM_182966    | NEDD9       | 0.595184007269423 | 0 | 2.00E-04 | 1 | 0.0014 | 0 | NA | NA |
| NM_001271033 | NEDD9       | 0.595184007269423 | 0 | 2.00E-04 | 1 | 0.0014 | 0 | NA | NA |
| NM_005042    | PRH2        | 0.594275329395729 | 0 | 2.00E-04 | 1 | 0.0014 | 0 | NA | NA |
| NM_001110213 | PRH2        | 0.593820990458882 | 0 | 2.00E-04 | 1 | 0.0014 | 0 | NA | NA |
| NM_000304    | PMP22       | 0.591549295774648 | 0 | 2.00E-04 | 1 | 0.0014 | 0 | NA | NA |
| NR_104017    | PMP22       | 0.591549295774648 | 0 | 2.00E-04 | 1 | 0.0014 | 0 | NA | NA |
| NR_104018    | PMP22       | 0.591549295774648 | 0 | 2.00E-04 | 1 | 0.0014 | 0 | NA | NA |
| NM_001281456 | PMP22       | 0.591549295774648 | 0 | 2.00E-04 | 1 | 0.0014 | 0 | NA | NA |
| NM_001168359 | TDRD6       | 0.591094956837801 | 0 | 2.00E-04 | 1 | 0.0014 | 0 | NA | NA |
| NM_001010870 | TDRD6       | 0.591094956837801 | 0 | 2.00E-04 | 1 | 0.0014 | 0 | NA | NA |
| NM_080610    | CST9L       | 0.589277601090413 | 0 | 2.00E-04 | 1 | 0.0014 | 0 | NA | NA |
| NM_005223    | DNASE1      | 0.587460245343026 | 0 | 2.00E-04 | 1 | 0.0014 | 0 | NA | NA |
| NM_006664    | CCL27       | 0.587005906406179 | 0 | 2.00E-04 | 1 | 0.0014 | 0 | NA | NA |
| NM_012184    | FOXD4L1     | 0.586551567469332 | 0 | 2.00E-04 | 1 | 0.0014 | 0 | NA | NA |
| NR_015407    | LOC339535   | 0.586097228532485 | 0 | 2.00E-04 | 1 | 0.0014 | 0 | NA | NA |
| NM_003611    | OFD1        | 0.581553839164016 | 0 | 2.00E-04 | 1 | 0.0014 | 0 | NA | NA |
| NM_002141    | HOXA4       | 0.581553839164016 | 0 | 2.00E-04 | 1 | 0.0014 | 0 | NA | NA |
| NR_002912    | SNORA67     | 0.581099500227169 | 0 | 2.00E-04 | 1 | 0.0014 | 0 | NA | NA |
| NR_037647    | FOXRED1     | 0.579282144479782 | 0 | 2.00E-04 | 1 | 0.0014 | 0 | NA | NA |
| NM_017547    | FOXRED1     | 0.579282144479782 | 0 | 2.00E-04 | 1 | 0.0014 | 0 | NA | NA |
| NM_001004457 | OR1N2       | 0.578373466606088 | 0 | 2.00E-04 | 1 | 0.0014 | 0 | NA | NA |
| NM_001001919 | OR13C4      | 0.574284416174466 | 0 | 2.00E-04 | 1 | 0.0014 | 0 | NA | NA |
| NR_038369    | LINC00487   | 0.571104043616538 | 0 | 2.00E-04 | 1 | 0.0014 | 0 | NA | NA |

|              |          |                   |   |          |   |        |   |    |    |
|--------------|----------|-------------------|---|----------|---|--------|---|----|----|
| NM_001243704 | ZBTB14   | 0.56792367105861  | 0 | 2.00E-04 | 1 | 0.0014 | 0 | NA | NA |
| NM_014729    | TOX      | 0.56792367105861  | 0 | 2.00E-04 | 1 | 0.0014 | 0 | NA | NA |
| NM_058206    | SPAG11B  | 0.566560654248069 | 0 | 2.00E-04 | 1 | 0.0014 | 0 | NA | NA |
| NM_058207    | SPAG11B  | 0.566560654248069 | 0 | 2.00E-04 | 1 | 0.0014 | 0 | NA | NA |
| NM_030650    | KIAA1715 | 0.564288959563835 | 0 | 2.00E-04 | 1 | 0.0014 | 0 | NA | NA |
| NM_030661    | HOXA3    | 0.5620172648796   | 0 | 2.00E-04 | 1 | 0.0014 | 0 | NA | NA |
| NM_006735    | HOXA2    | 0.56065424806906  | 0 | 2.00E-04 | 1 | 0.0014 | 0 | NA | NA |
| NM_004505    | USP6     | 0.559745570195366 | 0 | 2.00E-04 | 1 | 0.0014 | 0 | NA | NA |
| NR_027711    | OR5E1P   | 0.558836892321672 | 0 | 2.00E-04 | 1 | 0.0014 | 0 | NA | NA |
| NM_032041    | NCALD    | 0.558836892321672 | 0 | 2.00E-04 | 1 | 0.0014 | 0 | NA | NA |
| NR_026735    | GPN1     | 0.557019536574284 | 0 | 2.00E-04 | 1 | 0.0014 | 0 | NA | NA |
| NM_007266    | GPN1     | 0.557019536574284 | 0 | 2.00E-04 | 1 | 0.0014 | 0 | NA | NA |
| NM_001002923 | IGFL4    | 0.557019536574284 | 0 | 2.00E-04 | 1 | 0.0014 | 0 | NA | NA |
| NM_001197220 | PDE4D    | 0.553384825079509 | 0 | 2.00E-04 | 1 | 0.0014 | 0 | NA | NA |
| NM_001446    | FABP7    | 0.552930486142662 | 0 | 2.00E-04 | 1 | 0.0014 | 0 | NA | NA |
| NR_031697    | MIR1284  | 0.552021808268969 | 0 | 2.00E-04 | 1 | 0.0014 | 0 | NA | NA |
| NM_001097622 | OCM      | 0.551567469332122 | 0 | 2.00E-04 | 1 | 0.0014 | 0 | NA | NA |
| NR_039846    | MIR4697  | 0.551113130395275 | 0 | 2.00E-04 | 1 | 0.0014 | 0 | NA | NA |
| NM_001004694 | OR2T29   | 0.550658791458428 | 0 | 2.00E-04 | 1 | 0.0014 | 0 | NA | NA |
| NM_080387    | CLEC4D   | 0.54884143571104  | 0 | 2.00E-04 | 1 | 0.0014 | 0 | NA | NA |
| NM_001114094 | BLNK     | 0.54884143571104  | 0 | 2.00E-04 | 1 | 0.0014 | 0 | NA | NA |
| NM_013314    | BLNK     | 0.54884143571104  | 0 | 2.00E-04 | 1 | 0.0014 | 0 | NA | NA |
| NM_203373    | FBXL22   | 0.547932757837347 | 0 | 2.00E-04 | 1 | 0.0014 | 0 | NA | NA |
| NM_000396    | CTSK     | 0.545661063153112 | 0 | 2.00E-04 | 1 | 0.0014 | 0 | NA | NA |
| NM_172003    | CBWD2    | 0.542935029532031 | 0 | 2.00E-04 | 1 | 0.0014 | 0 | NA | NA |
| NM_024865    | NANOG    | 0.542480690595184 | 0 | 2.00E-04 | 1 | 0.0014 | 0 | NA | NA |
| NM_022359    | PDE4DIP  | 0.542480690595184 | 0 | 2.00E-04 | 1 | 0.0014 | 0 | NA | NA |
| NR_036209    | MIR4324  | 0.540663334847796 | 0 | 2.00E-04 | 1 | 0.0014 | 0 | NA | NA |
| NM_001127454 | DFNA5    | 0.540663334847796 | 0 | 2.00E-04 | 1 | 0.0014 | 0 | NA | NA |
| NM_001127453 | DFNA5    | 0.540663334847796 | 0 | 2.00E-04 | 1 | 0.0014 | 0 | NA | NA |
| NM_004403    | DFNA5    | 0.540663334847796 | 0 | 2.00E-04 | 1 | 0.0014 | 0 | NA | NA |
| NM_178822    | IGSF10   | 0.54020899591095  | 0 | 2.00E-04 | 1 | 0.0014 | 0 | NA | NA |
| NM_152622    | MIER3    | 0.54020899591095  | 0 | 2.00E-04 | 1 | 0.0014 | 0 | NA | NA |
| NM_001111018 | NAV2     | 0.539300318037256 | 0 | 2.00E-04 | 1 | 0.0014 | 0 | NA | NA |
| NM_001851    | COL9A1   | 0.537482962289868 | 0 | 2.00E-04 | 1 | 0.0014 | 0 | NA | NA |
| NM_012205    | HAAO     | 0.537028623353021 | 0 | 2.00E-04 | 1 | 0.0014 | 0 | NA | NA |
| NM_004560    | ROR2     | 0.536574284416174 | 0 | 2.00E-04 | 1 | 0.0014 | 0 | NA | NA |
| NM_001243723 | SETMAR   | 0.535211267605634 | 0 | 2.00E-04 | 1 | 0.0014 | 0 | NA | NA |
| NM_006515    | SETMAR   | 0.535211267605634 | 0 | 2.00E-04 | 1 | 0.0014 | 0 | NA | NA |
| NM_001276325 | SETMAR   | 0.535211267605634 | 0 | 2.00E-04 | 1 | 0.0014 | 0 | NA | NA |
| NR_075073    | SETMAR   | 0.535211267605634 | 0 | 2.00E-04 | 1 | 0.0014 | 0 | NA | NA |
| NM_001369    | DNAH5    | 0.535211267605634 | 0 | 2.00E-04 | 1 | 0.0014 | 0 | NA | NA |
| NM_019602    | BTNL2    | 0.533393911858246 | 0 | 2.00E-04 | 1 | 0.0014 | 0 | NA | NA |
| NM_182913    | SYNE2    | 0.532030895047706 | 0 | 2.00E-04 | 1 | 0.0014 | 0 | NA | NA |

|              |              |                   |                    |          |   |        |   |    |    |
|--------------|--------------|-------------------|--------------------|----------|---|--------|---|----|----|
| NM_024751    | GSTCD        | 0.532030895047706 | 0                  | 2.00E-04 | 1 | 0.0014 | 0 | NA | NA |
| NR_037648    | FOXRED1      | 0.531576556110859 | 0                  | 2.00E-04 | 1 | 0.0014 | 0 | NA | NA |
| NM_024410    | ODF1         | 0.528850522489777 | 0                  | 2.00E-04 | 1 | 0.0014 | 0 | NA | NA |
| NR_033942    | ARHGEF34P    | 0.526578827805543 | 0                  | 2.00E-04 | 1 | 0.0014 | 0 | NA | NA |
| NM_147180    | PPP3R2       | 0.526578827805543 | 0                  | 2.00E-04 | 1 | 0.0014 | 0 | NA | NA |
| NM_000601    | HGF          | 0.525670149931849 | 0                  | 2.00E-04 | 1 | 0.0014 | 0 | NA | NA |
| NM_001010933 | HGF          | 0.525670149931849 | 0                  | 2.00E-04 | 1 | 0.0014 | 0 | NA | NA |
| NM_001010931 | HGF          | 0.525670149931849 | 0                  | 2.00E-04 | 1 | 0.0014 | 0 | NA | NA |
| NM_001010934 | HGF          | 0.525670149931849 | 0                  | 2.00E-04 | 1 | 0.0014 | 0 | NA | NA |
| NM_001010932 | HGF          | 0.525670149931849 | 0                  | 2.00E-04 | 1 | 0.0014 | 0 | NA | NA |
| NM_000220    | KCNJ1        | 0.524307133121308 | 0                  | 2.00E-04 | 1 | 0.0014 | 0 | NA | NA |
| NM_006576    | AVIL         | 0.522944116310768 | 0                  | 2.00E-04 | 1 | 0.0014 | 0 | NA | NA |
| NR_000011    | SNORA70      | 0.583825533848251 | 0.0622444343480236 | 2.00E-04 | 1 | 0.0014 | 0 | NA | NA |
| NM_001258442 | BLNK         | 0.521581099500227 | 0                  | 2.00E-04 | 1 | 0.0014 | 0 | NA | NA |
| NM_001258441 | BLNK         | 0.521581099500227 | 0                  | 2.00E-04 | 1 | 0.0014 | 0 | NA | NA |
| NM_001258440 | BLNK         | 0.521581099500227 | 0                  | 2.00E-04 | 1 | 0.0014 | 0 | NA | NA |
| NR_047683    | BLNK         | 0.521581099500227 | 0                  | 2.00E-04 | 1 | 0.0014 | 0 | NA | NA |
| NR_047682    | BLNK         | 0.521581099500227 | 0                  | 2.00E-04 | 1 | 0.0014 | 0 | NA | NA |
| NR_047681    | BLNK         | 0.521581099500227 | 0                  | 2.00E-04 | 1 | 0.0014 | 0 | NA | NA |
| NR_047680    | BLNK         | 0.521581099500227 | 0                  | 2.00E-04 | 1 | 0.0014 | 0 | NA | NA |
| NM_001244984 | SEL1L        | 0.521581099500227 | 0                  | 2.00E-04 | 1 | 0.0014 | 0 | NA | NA |
| NM_005065    | SEL1L        | 0.521581099500227 | 0                  | 2.00E-04 | 1 | 0.0014 | 0 | NA | NA |
| NR_024507    | LINCO0598    | 0.520672421626533 | 0                  | 2.00E-04 | 1 | 0.0014 | 0 | NA | NA |
| NR_024506    | LINCO0598    | 0.520672421626533 | 0                  | 2.00E-04 | 1 | 0.0014 | 0 | NA | NA |
| NR_024505    | LINCO0598    | 0.520672421626533 | 0                  | 2.00E-04 | 1 | 0.0014 | 0 | NA | NA |
| NM_014483    | RBMS3        | 0.520218082689687 | 0                  | 2.00E-04 | 1 | 0.0014 | 0 | NA | NA |
| NM_001177712 | RBMS3        | 0.520218082689687 | 0                  | 2.00E-04 | 1 | 0.0014 | 0 | NA | NA |
| NM_001177711 | RBMS3        | 0.520218082689687 | 0                  | 2.00E-04 | 1 | 0.0014 | 0 | NA | NA |
| NM_001003792 | RBMS3        | 0.520218082689687 | 0                  | 2.00E-04 | 1 | 0.0014 | 0 | NA | NA |
| NM_001003793 | RBMS3        | 0.520218082689687 | 0                  | 2.00E-04 | 1 | 0.0014 | 0 | NA | NA |
| NM_001004459 | OR1S2        | 0.51976374375284  | 0                  | 2.00E-04 | 1 | 0.0014 | 0 | NA | NA |
| NR_073494    | LOC100130075 | 0.51976374375284  | 0                  | 2.00E-04 | 1 | 0.0014 | 0 | NA | NA |
| NM_003581    | NCK2         | 0.518855065879146 | 0                  | 2.00E-04 | 1 | 0.0014 | 0 | NA | NA |
| NM_001004722 | NCK2         | 0.518855065879146 | 0                  | 2.00E-04 | 1 | 0.0014 | 0 | NA | NA |
| NM_001276    | CHI3L1       | 0.514311676510677 | 0                  | 2.00E-04 | 1 | 0.0014 | 0 | NA | NA |
| NM_001079827 | CLRN2        | 0.51385733757383  | 0                  | 2.00E-04 | 1 | 0.0014 | 0 | NA | NA |
| NR_037889    | LOC285626    | 0.51385733757383  | 0                  | 2.00E-04 | 1 | 0.0014 | 0 | NA | NA |
| NR_037480    | MIR3916      | 0.51385733757383  | 0                  | 2.00E-04 | 1 | 0.0014 | 0 | NA | NA |
| NR_028399    | TSNAX-DISC1  | 0.509768287142208 | 0                  | 2.00E-04 | 1 | 0.0014 | 0 | NA | NA |
| NR_028394    | TSNAX-DISC1  | 0.509768287142208 | 0                  | 2.00E-04 | 1 | 0.0014 | 0 | NA | NA |
| NR_028393    | TSNAX-DISC1  | 0.509768287142208 | 0                  | 2.00E-04 | 1 | 0.0014 | 0 | NA | NA |
| NR_028400    | TSNAX-DISC1  | 0.509768287142208 | 0                  | 2.00E-04 | 1 | 0.0014 | 0 | NA | NA |
| NR_028396    | TSNAX-DISC1  | 0.509768287142208 | 0                  | 2.00E-04 | 1 | 0.0014 | 0 | NA | NA |
| NR_028395    | TSNAX-DISC1  | 0.509768287142208 | 0                  | 2.00E-04 | 1 | 0.0014 | 0 | NA | NA |

|              |                    |                   |                    |          |   |        |   |    |    |
|--------------|--------------------|-------------------|--------------------|----------|---|--------|---|----|----|
| NR_028398    | <i>TSNAX-DISC1</i> | 0.509768287142208 | 0                  | 2.00E-04 | 1 | 0.0014 | 0 | NA | NA |
| NR_028397    | <i>TSNAX-DISC1</i> | 0.509768287142208 | 0                  | 2.00E-04 | 1 | 0.0014 | 0 | NA | NA |
| NM_005999    | <i>TSNAX</i>       | 0.509768287142208 | 0                  | 2.00E-04 | 1 | 0.0014 | 0 | NA | NA |
| NM_007281    | <i>SCRG1</i>       | 0.509768287142208 | 0                  | 2.00E-04 | 1 | 0.0014 | 0 | NA | NA |
| NM_006493    | <i>CLN5</i>        | 0.507950931394821 | 0                  | 2.00E-04 | 1 | 0.0014 | 0 | NA | NA |
| NM_018230    | <i>NUP133</i>      | 0.505679236710586 | 0                  | 2.00E-04 | 1 | 0.0014 | 0 | NA | NA |
| NM_015350    | <i>LRRC8B</i>      | 0.504770558836892 | 0                  | 2.00E-04 | 1 | 0.0014 | 0 | NA | NA |
| NR_003945    | <i>GVINP1</i>      | 0.503861880963199 | 0                  | 2.00E-04 | 1 | 0.0014 | 0 | NA | NA |
| NM_144992    | <i>VWA3B</i>       | 0.503407542026352 | 0                  | 2.00E-04 | 1 | 0.0014 | 0 | NA | NA |
| NM_207305    | <i>FOXO4</i>       | 0.502498864152658 | 0                  | 2.00E-04 | 1 | 0.0014 | 0 | NA | NA |
| NM_004077    | <i>CS</i>          | 0.501135847342117 | 0                  | 2.00E-04 | 1 | 0.0014 | 0 | NA | NA |
| NM_016078    | <i>TVP23B</i>      | 0.496592457973648 | 0                  | 2.00E-04 | 1 | 0.0014 | 0 | NA | NA |
| NR_002216    | <i>NXF4</i>        | 0.496138119036801 | 0                  | 2.00E-04 | 1 | 0.0014 | 0 | NA | NA |
| NM_001145718 | <i>CT47B1</i>      | 0.494775102226261 | 0                  | 2.00E-04 | 1 | 0.0014 | 0 | NA | NA |
| NM_001282786 | <i>PRTFDC1</i>     | 0.519309404815993 | 0.0249886415265788 | 2.00E-04 | 1 | 0.0014 | 0 | NA | NA |
| NM_020200    | <i>PRTFDC1</i>     | 0.519309404815993 | 0.0249886415265788 | 2.00E-04 | 1 | 0.0014 | 0 | NA | NA |
| NM_001167924 | <i>CMSS1</i>       | 0.494320763289414 | 0                  | 2.00E-04 | 1 | 0.0014 | 0 | NA | NA |
| NM_001169118 | <i>STIM2</i>       | 0.49341208541572  | 0                  | 2.00E-04 | 1 | 0.0014 | 0 | NA | NA |
| NM_001169117 | <i>STIM2</i>       | 0.49341208541572  | 0                  | 2.00E-04 | 1 | 0.0014 | 0 | NA | NA |
| NM_020860    | <i>STIM2</i>       | 0.49341208541572  | 0                  | 2.00E-04 | 1 | 0.0014 | 0 | NA | NA |
| NM_000600    | <i>IL6</i>         | 0.49341208541572  | 0                  | 2.00E-04 | 1 | 0.0014 | 0 | NA | NA |
| NM_001198834 | <i>PDE4DIP</i>     | 0.492957746478873 | 0                  | 2.00E-04 | 1 | 0.0014 | 0 | NA | NA |
| NM_014644    | <i>PDE4DIP</i>     | 0.492957746478873 | 0                  | 2.00E-04 | 1 | 0.0014 | 0 | NA | NA |
| NM_001002812 | <i>PDE4DIP</i>     | 0.492957746478873 | 0                  | 2.00E-04 | 1 | 0.0014 | 0 | NA | NA |
| NM_001195261 | <i>PDE4DIP</i>     | 0.492957746478873 | 0                  | 2.00E-04 | 1 | 0.0014 | 0 | NA | NA |
| NM_001002810 | <i>PDE4DIP</i>     | 0.492957746478873 | 0                  | 2.00E-04 | 1 | 0.0014 | 0 | NA | NA |
| NM_001085455 | <i>KRTAP24-1</i>   | 0.492957746478873 | 0                  | 2.00E-04 | 1 | 0.0014 | 0 | NA | NA |
| NM_198691    | <i>KRTAP10-1</i>   | 0.492957746478873 | 0                  | 2.00E-04 | 1 | 0.0014 | 0 | NA | NA |
| NM_006729    | <i>DIAPH2</i>      | 0.492503407542026 | 0                  | 2.00E-04 | 1 | 0.0014 | 0 | NA | NA |
| NM_007309    | <i>DIAPH2</i>      | 0.492503407542026 | 0                  | 2.00E-04 | 1 | 0.0014 | 0 | NA | NA |
| NM_001111284 | <i>IGF1</i>        | 0.489777373920945 | 0                  | 2.00E-04 | 1 | 0.0014 | 0 | NA | NA |
| NM_001159353 | <i>REG4</i>        | 0.487505679236711 | 0                  | 2.00E-04 | 1 | 0.0014 | 0 | NA | NA |
| NM_001159352 | <i>REG4</i>        | 0.487505679236711 | 0                  | 2.00E-04 | 1 | 0.0014 | 0 | NA | NA |
| NM_032044    | <i>REG4</i>        | 0.487505679236711 | 0                  | 2.00E-04 | 1 | 0.0014 | 0 | NA | NA |
| NM_018181    | <i>ZNF532</i>      | 0.487051340299864 | 0                  | 2.00E-04 | 1 | 0.0014 | 0 | NA | NA |
| NM_001112720 | <i>LIMCH1</i>      | 0.48614266242617  | 0                  | 2.00E-04 | 1 | 0.0014 | 0 | NA | NA |
| NM_001112719 | <i>LIMCH1</i>      | 0.48614266242617  | 0                  | 2.00E-04 | 1 | 0.0014 | 0 | NA | NA |
| NM_054021    | <i>GPR101</i>      | 0.485233984552476 | 0                  | 2.00E-04 | 1 | 0.0014 | 0 | NA | NA |
| NM_001195260 | <i>PDE4DIP</i>     | 0.484779645615629 | 0                  | 2.00E-04 | 1 | 0.0014 | 0 | NA | NA |
| NR_002163    | <i>OR7E37P</i>     | 0.483416628805089 | 0                  | 2.00E-04 | 1 | 0.0014 | 0 | NA | NA |
| NM_001174125 | <i>SLC11A2</i>     | 0.482507950931395 | 0                  | 2.00E-04 | 1 | 0.0014 | 0 | NA | NA |
| NM_016609    | <i>SLC22A17</i>    | 0.482053611994548 | 0                  | 2.00E-04 | 1 | 0.0014 | 0 | NA | NA |
| NM_001004458 | <i>OR1S1</i>       | 0.481144934120854 | 0                  | 2.00E-04 | 1 | 0.0014 | 0 | NA | NA |
| NM_001163677 | <i>KCNMB3</i>      | 0.479327578373467 | 0                  | 2.00E-04 | 1 | 0.0014 | 0 | NA | NA |

|              |           |                   |   |          |   |        |   |    |    |
|--------------|-----------|-------------------|---|----------|---|--------|---|----|----|
| NM_171828    | KCNMB3    | 0.479327578373467 | 0 | 2.00E-04 | 1 | 0.0014 | 0 | NA | NA |
| NM_001039960 | SLC4A8    | 0.47887323943662  | 0 | 2.00E-04 | 1 | 0.0014 | 0 | NA | NA |
| NM_001258402 | SLC4A8    | 0.47887323943662  | 0 | 2.00E-04 | 1 | 0.0014 | 0 | NA | NA |
| NR_047672    | SLC4A8    | 0.47887323943662  | 0 | 2.00E-04 | 1 | 0.0014 | 0 | NA | NA |
| NM_175064    | SPDYE1    | 0.477964561562926 | 0 | 2.00E-04 | 1 | 0.0014 | 0 | NA | NA |
| NM_020130    | C8orf4    | 0.477964561562926 | 0 | 2.00E-04 | 1 | 0.0014 | 0 | NA | NA |
| NM_013260    | SAP30BP   | 0.477055883689232 | 0 | 2.00E-04 | 1 | 0.0014 | 0 | NA | NA |
| NM_001037866 | RGPD6     | 0.477055883689232 | 0 | 2.00E-04 | 1 | 0.0014 | 0 | NA | NA |
| NM_198698    | KRTAP12-4 | 0.477055883689232 | 0 | 2.00E-04 | 1 | 0.0014 | 0 | NA | NA |
| NM_005727    | TSPAN1    | 0.475692866878692 | 0 | 2.00E-04 | 1 | 0.0014 | 0 | NA | NA |
| NM_015365    | AMMECR1   | 0.474329850068151 | 0 | 2.00E-04 | 1 | 0.0014 | 0 | NA | NA |
| NM_001025580 | AMMECR1   | 0.474329850068151 | 0 | 2.00E-04 | 1 | 0.0014 | 0 | NA | NA |
| NM_001206789 | TMPRSS13  | 0.473875511131304 | 0 | 2.00E-04 | 1 | 0.0014 | 0 | NA | NA |
| NM_001244995 | TMPRSS13  | 0.473875511131304 | 0 | 2.00E-04 | 1 | 0.0014 | 0 | NA | NA |
| NM_001077263 | TMPRSS13  | 0.473875511131304 | 0 | 2.00E-04 | 1 | 0.0014 | 0 | NA | NA |
| NM_001206790 | TMPRSS13  | 0.473875511131304 | 0 | 2.00E-04 | 1 | 0.0014 | 0 | NA | NA |
| NM_178520    | TMEM105   | 0.473875511131304 | 0 | 2.00E-04 | 1 | 0.0014 | 0 | NA | NA |
| NR_015441    | LOC652276 | 0.472512494320763 | 0 | 2.00E-04 | 1 | 0.0014 | 0 | NA | NA |
| NM_138800    | TRIM43    | 0.472512494320763 | 0 | 2.00E-04 | 1 | 0.0014 | 0 | NA | NA |
| NR_003671    | LOC728024 | 0.470695138573376 | 0 | 2.00E-04 | 1 | 0.0014 | 0 | NA | NA |
| NM_001145646 | APH1B     | 0.470240799636529 | 0 | 2.00E-04 | 1 | 0.0014 | 0 | NA | NA |
| NM_031301    | APH1B     | 0.470240799636529 | 0 | 2.00E-04 | 1 | 0.0014 | 0 | NA | NA |
| NM_001114598 | ASPDH     | 0.470240799636529 | 0 | 2.00E-04 | 1 | 0.0014 | 0 | NA | NA |
| NM_017922    | PRPF39    | 0.469332121762835 | 0 | 2.00E-04 | 1 | 0.0014 | 0 | NA | NA |
| NM_001258403 | SLC4A8    | 0.467969104952294 | 0 | 2.00E-04 | 1 | 0.0014 | 0 | NA | NA |
| NR_023311    | ZNF137P   | 0.467969104952294 | 0 | 2.00E-04 | 1 | 0.0014 | 0 | NA | NA |
| NR_040037    | PTOV1-AS1 | 0.467514766015448 | 0 | 2.00E-04 | 1 | 0.0014 | 0 | NA | NA |
| NM_001137608 | ZNF732    | 0.466151749204907 | 0 | 2.00E-04 | 1 | 0.0014 | 0 | NA | NA |
| NM_004535    | MYT1      | 0.46569741026806  | 0 | 2.00E-04 | 1 | 0.0014 | 0 | NA | NA |
| NM_006672    | SLC22A7   | 0.46569741026806  | 0 | 2.00E-04 | 1 | 0.0014 | 0 | NA | NA |
| NM_153320    | SLC22A7   | 0.46569741026806  | 0 | 2.00E-04 | 1 | 0.0014 | 0 | NA | NA |
| NM_054112    | DEFB118   | 0.463425715583826 | 0 | 2.00E-04 | 1 | 0.0014 | 0 | NA | NA |
| NM_012374    | OR4D1     | 0.462517037710132 | 0 | 2.00E-04 | 1 | 0.0014 | 0 | NA | NA |
| NM_198511    | LANCL3    | 0.462517037710132 | 0 | 2.00E-04 | 1 | 0.0014 | 0 | NA | NA |
| NM_001170331 | LANCL3    | 0.462517037710132 | 0 | 2.00E-04 | 1 | 0.0014 | 0 | NA | NA |
| NM_178168    | OR10A5    | 0.461154020899591 | 0 | 2.00E-04 | 1 | 0.0014 | 0 | NA | NA |
| NM_003643    | GCM1      | 0.460699681962744 | 0 | 2.00E-04 | 1 | 0.0014 | 0 | NA | NA |
| NM_203399    | STMN1     | 0.459336665152204 | 0 | 2.00E-04 | 1 | 0.0014 | 0 | NA | NA |
| NM_080838    | WISP1     | 0.45842798727851  | 0 | 2.00E-04 | 1 | 0.0014 | 0 | NA | NA |
| NR_037944    | WISP1     | 0.45842798727851  | 0 | 2.00E-04 | 1 | 0.0014 | 0 | NA | NA |
| NM_001204870 | WISP1     | 0.45842798727851  | 0 | 2.00E-04 | 1 | 0.0014 | 0 | NA | NA |
| NM_003882    | WISP1     | 0.45842798727851  | 0 | 2.00E-04 | 1 | 0.0014 | 0 | NA | NA |
| NM_001204869 | WISP1     | 0.45842798727851  | 0 | 2.00E-04 | 1 | 0.0014 | 0 | NA | NA |
| NM_173543    | DZIP1L    | 0.457973648341663 | 0 | 2.00E-04 | 1 | 0.0014 | 0 | NA | NA |



|              |           |                   |                    |          |       |        |          |    |    |
|--------------|-----------|-------------------|--------------------|----------|-------|--------|----------|----|----|
| NR_002443    | SNORD18C  | 0.490231712857792 | 0.0327124034529759 | 2.00E-04 | 1     | 0.0014 | 0        | NA | NA |
| NM_145203    | CSNK1A1L  | 0.456610631531122 | 0                  | 2.00E-04 | 1     | 0.0014 | 0        | NA | NA |
| NM_024659    | GTDC1     | 0.456610631531122 | 0                  | 2.00E-04 | 1     | 0.0014 | 0        | NA | NA |
| NM_001284338 | NEDD4     | 0.455701953657428 | 0                  | 2.00E-04 | 1     | 0.0014 | 0        | NA | NA |
| NM_001284340 | NEDD4     | 0.455701953657428 | 0                  | 2.00E-04 | 1     | 0.0014 | 0        | NA | NA |
| NM_198400    | NEDD4     | 0.455701953657428 | 0                  | 2.00E-04 | 1     | 0.0014 | 0        | NA | NA |
| NR_104302    | NEDD4     | 0.455701953657428 | 0                  | 2.00E-04 | 1     | 0.0014 | 0        | NA | NA |
| NM_001284339 | NEDD4     | 0.455701953657428 | 0                  | 2.00E-04 | 1     | 0.0014 | 0        | NA | NA |
| NM_007035    | KERA      | 0.454793275783735 | 0                  | 2.00E-04 | 1     | 0.0014 | 0        | NA | NA |
| NM_001004690 | OR2M5     | 0.454338936846888 | 0                  | 2.00E-04 | 1     | 0.0014 | 0        | NA | NA |
| NM_153368    | GJD4      | 0.453430258973194 | 0                  | 2.00E-04 | 1     | 0.0014 | 0        | NA | NA |
| NM_213656    | KRT39     | 0.453430258973194 | 0                  | 2.00E-04 | 1     | 0.0014 | 0        | NA | NA |
| NR_002738    | SNORD57   | 0.452975920036347 | 0                  | 2.00E-04 | 1     | 0.0014 | 0        | NA | NA |
| NM_001024661 | PRAMEF13  | 0.452975920036347 | 0                  | 2.00E-04 | 1     | 0.0014 | 0        | NA | NA |
| NM_001640    | APEH      | 0.452067242162653 | 0                  | 2.00E-04 | 1     | 0.0014 | 0        | NA | NA |
| NM_020866    | KLHL1     | 0.450704225352113 | 0                  | 2.00E-04 | 1     | 0.0014 | 0        | NA | NA |
| NM_023013    | PRAMEF1   | 0.450249886415266 | 0                  | 2.00E-04 | 1     | 0.0014 | 0        | NA | NA |
| NM_001123363 | RGPD6     | 0.450249886415266 | 0                  | 2.00E-04 | 1     | 0.0014 | 0        | NA | NA |
| NM_014234    | HSD17B8   | 0.450249886415266 | 0                  | 2.00E-04 | 1     | 0.0014 | 0        | NA | NA |
| NR_030295    | MIR569    | 0.450249886415266 | 0                  | 2.00E-04 | 1     | 0.0014 | 0        | NA | NA |
| NM_001012732 | DCTD      | 0.450249886415266 | 0                  | 2.00E-04 | 1     | 0.0014 | 0        | NA | NA |
| NM_001921    | DCTD      | 0.450249886415266 | 0                  | 2.00E-04 | 1     | 0.0014 | 0        | NA | NA |
| NM_173527    | REM2      | 0.449795547478419 | 0                  | 2.00E-04 | 1     | 0.0014 | 0        | NA | NA |
| NR_026833    | LOC400940 | 0.449795547478419 | 0                  | 2.00E-04 | 1     | 0.0014 | 0        | NA | NA |
| NM_032583    | ABCC11    | 0.449795547478419 | 0                  | 2.00E-04 | 1     | 0.0014 | 0        | NA | NA |
| NM_145186    | ABCC11    | 0.449795547478419 | 0                  | 2.00E-04 | 1     | 0.0014 | 0        | NA | NA |
| NM_018652    | GOLGA6B   | 0.448886869604725 | 0                  | 2.00E-04 | 1     | 0.0014 | 0        | NA | NA |
| NM_004371    | COPA      | 0.448886869604725 | 0                  | 2.00E-04 | 1     | 0.0014 | 0        | NA | NA |
| NM_001098398 | COPA      | 0.448886869604725 | 0                  | 2.00E-04 | 1     | 0.0014 | 0        | NA | NA |
| NM_001136023 | NFE2      | 0.447978191731031 | 0                  | 2.00E-04 | 1     | 0.0014 | 0        | NA | NA |
| NM_001261461 | NFE2      | 0.447978191731031 | 0                  | 2.00E-04 | 1     | 0.0014 | 0        | NA | NA |
| NM_021999    | ITM2B     | 0.447523852794184 | 0                  | 2.00E-04 | 1     | 0.0014 | 0        | NA | NA |
| NR_030775    | SHISA4    | 0.446160835983644 | 0                  | 2.00E-04 | 1     | 0.0014 | 0        | NA | NA |
| NM_198149    | SHISA4    | 0.446160835983644 | 0                  | 2.00E-04 | 1     | 0.0014 | 0        | NA | NA |
| NM_020127    | TUFT1     | 0.538391640163562 | 0.0922308041799182 | 2.00E-04 | 1     | 0.0014 | 0        | NA | NA |
| NM_001126337 | TUFT1     | 0.538391640163562 | 0.0922308041799182 | 2.00E-04 | 1     | 0.0014 | 0        | NA | NA |
| NM_000557    | GDF5      | 0.445706497046797 | 0                  | 2.00E-04 | 1     | 0.0014 | 0        | NA | NA |
| NM_020245    | TULP4     | 0.512948659700136 | 0.0672421626533394 | 2.00E-04 | 1     | 0.0014 | 0        | NA | NA |
| NM_001007466 | TULP4     | 0.512948659700136 | 0.0672421626533394 | 2.00E-04 | 1     | 0.0014 | 0        | NA | NA |
| NM_016815    | GYPC      | 0.44525215810995  | 0                  | 2.00E-04 | 1     | 0.0014 | 0        | NA | NA |
| NM_001256584 | GYPC      | 0.44525215810995  | 0                  | 2.00E-04 | 1     | 0.0014 | 0        | NA | NA |
| NM_002101    | GYPC      | 0.44525215810995  | 0                  | 2.00E-04 | 1     | 0.0014 | 0        | NA | NA |
| NR_036210    | MIR4256   | 0.44525215810995  | 0                  | 2.00E-04 | 1     | 0.0014 | 0        | NA | NA |
| NM_012444    | SPO11     | 0.444797819173103 | 0                  | 0.001    | 0.999 | 0.0104 | 2.00E-04 | NA | NA |

|              |           |                   |                     |          |        |        |          |    |    |
|--------------|-----------|-------------------|---------------------|----------|--------|--------|----------|----|----|
| NM_198265    | SPO11     | 0.444797819173103 | 0                   | 0.001    | 0.999  | 0.0104 | 2.00E-04 | NA | NA |
| NR_026677    | MIR600HG  | 0.444343480236256 | 0                   | 2.00E-04 | 1      | 0.0014 | 0        | NA | NA |
| NM_006399    | BATF      | 0.443889141299409 | 0                   | 2.00E-04 | 1      | 0.0014 | 0        | NA | NA |
| NM_012390    | SMR3A     | 0.443889141299409 | 0                   | 2.00E-04 | 1      | 0.0014 | 0        | NA | NA |
| NM_024873    | TNIP3     | 0.443889141299409 | 0                   | 2.00E-04 | 1      | 0.0014 | 0        | NA | NA |
| NM_147193    | GLIS1     | 0.442980463425716 | 0                   | 2.00E-04 | 1      | 0.0014 | 0        | NA | NA |
| NR_037415    | MIR3620   | 0.442526124488869 | 0                   | 2.00E-04 | 1      | 0.0014 | 0        | NA | NA |
| NM_183065    | TMEM107   | 0.442526124488869 | 0                   | 2.00E-04 | 1      | 0.0014 | 0        | NA | NA |
| NM_032354    | TMEM107   | 0.442526124488869 | 0                   | 2.00E-04 | 1      | 0.0014 | 0        | NA | NA |
| NR_045585    | SDF2      | 0.442526124488869 | 0                   | 2.00E-04 | 1      | 0.0014 | 0        | NA | NA |
| NM_001243775 | LIMA1     | 0.442071785552022 | 0                   | 2.00E-04 | 1      | 0.0014 | 0        | NA | NA |
| NR_046449    | LOC374443 | 0.441163107678328 | 0                   | 2.00E-04 | 1      | 0.0014 | 0        | NA | NA |
| NM_001242814 | ANKRD6    | 0.440708768741481 | 0                   | 2.00E-04 | 1      | 0.0014 | 0        | NA | NA |
| NM_001936    | DPP6      | 0.440254429804634 | 0                   | 2.00E-04 | 1      | 0.0014 | 0        | NA | NA |
| NM_024297    | PHF23     | 0.439800090867787 | 0                   | 2.00E-04 | 1      | 0.0014 | 0        | NA | NA |
| NM_001284517 | PHF23     | 0.439800090867787 | 0                   | 2.00E-04 | 1      | 0.0014 | 0        | NA | NA |
| NM_032681    | TRIM51    | 0.438437074057247 | 0                   | 2.00E-04 | 1      | 0.0014 | 0        | NA | NA |
| NM_001010940 | C9orf135  | 0.4379827351204   | 0                   | 2.00E-04 | 1      | 0.0014 | 0        | NA | NA |
| NR_027245    | LINC00305 | 0.437528396183553 | 0                   | 2.00E-04 | 1      | 0.0014 | 0        | NA | NA |
| NM_022131    | CLSTN2    | 0.437074057246706 | 0                   | 2.00E-04 | 1      | 0.0014 | 0        | NA | NA |
| NM_021072    | HCN1      | 0.437074057246706 | 0                   | 2.00E-04 | 0.9996 | 0.0014 | 0        | NA | NA |
| NM_003248    | THBS4     | 0.436165379373012 | 0                   | 2.00E-04 | 1      | 0.0014 | 0        | NA | NA |
| NM_032960    | MAPKAPK2  | 0.435711040436165 | 0                   | 2.00E-04 | 1      | 0.0014 | 0        | NA | NA |
| NM_004759    | MAPKAPK2  | 0.435711040436165 | 0                   | 2.00E-04 | 1      | 0.0014 | 0        | NA | NA |
| NM_006923    | SDF2      | 0.434802362562472 | 0                   | 2.00E-04 | 1      | 0.0014 | 0        | NA | NA |
| NR_002575    | SNORA27   | 0.432985006815084 | 0                   | 2.00E-04 | 1      | 0.0014 | 0        | NA | NA |
| NM_001024075 | HNMT      | 0.43207632894139  | 0                   | 2.00E-04 | 1      | 0.0014 | 0        | NA | NA |
| NM_001024074 | HNMT      | 0.43207632894139  | 0                   | 2.00E-04 | 1      | 0.0014 | 0        | NA | NA |
| NM_006895    | HNMT      | 0.43207632894139  | 0                   | 2.00E-04 | 1      | 0.0014 | 0        | NA | NA |
| NM_001167676 | FAM229A   | 0.43207632894139  | 0                   | 2.00E-04 | 1      | 0.0014 | 0        | NA | NA |
| NM_006018    | HCAR3     | 0.431167651067697 | 0                   | 2.00E-04 | 1      | 0.0014 | 0        | NA | NA |
| NM_001165964 | SCN1A     | 0.431167651067697 | 0                   | 2.00E-04 | 1      | 0.0014 | 0        | NA | NA |
| NM_001165963 | SCN1A     | 0.431167651067697 | 0                   | 2.00E-04 | 1      | 0.0014 | 0        | NA | NA |
| NM_006920    | SCN1A     | 0.431167651067697 | 0                   | 2.00E-04 | 1      | 0.0014 | 0        | NA | NA |
| NM_170746    | C11orf31  | 0.432530667878237 | 0.00136301681054066 | 2.00E-04 | 1      | 0.0014 | 0        | NA | NA |
| NM_177551    | HCAR2     | 0.43071331213085  | 0                   | 2.00E-04 | 1      | 0.0014 | 0        | NA | NA |
| NM_176813    | AGR3      | 0.43071331213085  | 0                   | 2.00E-04 | 1      | 0.0014 | 0        | NA | NA |
| NR_000017    | SNORD36B  | 0.613811903680145 | 0.183552930486143   | 2.00E-04 | 1      | 0.0014 | 0        | NA | NA |
| NM_178466    | BPIFA3    | 0.429804634257156 | 0                   | 2.00E-04 | 1      | 0.0014 | 0        | NA | NA |
| NM_001042439 | BPIFA3    | 0.429804634257156 | 0                   | 2.00E-04 | 1      | 0.0014 | 0        | NA | NA |
| NM_001001417 | TBC1D3B   | 0.429804634257156 | 0                   | 2.00E-04 | 1      | 0.0014 | 0        | NA | NA |
| NM_198475    | FAM171A2  | 0.429804634257156 | 0                   | 2.00E-04 | 1      | 0.0014 | 0        | NA | NA |
| NM_016343    | CENPF     | 0.429350295320309 | 0                   | 2.00E-04 | 1      | 0.0014 | 0        | NA | NA |
| NM_001145454 | STMN1     | 0.429350295320309 | 0                   | 2.00E-04 | 1      | 0.0014 | 0        | NA | NA |

|              |          |                   |                     |          |   |        |   |    |    |
|--------------|----------|-------------------|---------------------|----------|---|--------|---|----|----|
| NM_005563    | STMN1    | 0.429350295320309 | 0                   | 2.00E-04 | 1 | 0.0014 | 0 | NA | NA |
| NM_001267536 | GOLGA6L4 | 0.428895956383462 | 0                   | 2.00E-04 | 1 | 0.0014 | 0 | NA | NA |
| NR_001285    | SNORD35B | 0.428895956383462 | 0                   | 2.00E-04 | 1 | 0.0014 | 0 | NA | NA |
| NM_000492    | CFTR     | 0.428895956383462 | 0                   | 2.00E-04 | 1 | 0.0014 | 0 | NA | NA |
| NR_003260    | DNM1P46  | 0.428441617446615 | 0                   | 2.00E-04 | 1 | 0.0014 | 0 | NA | NA |
| NR_027153    | RPL21P44 | 0.427987278509768 | 0                   | 2.00E-04 | 1 | 0.0014 | 0 | NA | NA |
| NM_197975    | BTNL3    | 0.427532939572921 | 0                   | 2.00E-04 | 1 | 0.0014 | 0 | NA | NA |
| NM_032747    | USMG5    | 0.427078600636075 | 0                   | 2.00E-04 | 1 | 0.0014 | 0 | NA | NA |
| NM_001206427 | USMG5    | 0.427078600636075 | 0                   | 2.00E-04 | 1 | 0.0014 | 0 | NA | NA |
| NM_001206426 | USMG5    | 0.427078600636075 | 0                   | 2.00E-04 | 1 | 0.0014 | 0 | NA | NA |
| NM_001144831 | PHB2     | 0.425261244888687 | 0                   | 2.00E-04 | 1 | 0.0014 | 0 | NA | NA |
| NM_001267700 | PHB2     | 0.425261244888687 | 0                   | 2.00E-04 | 1 | 0.0014 | 0 | NA | NA |
| NM_004267    | CHST2    | 0.42480690595184  | 0                   | 2.00E-04 | 1 | 0.0014 | 0 | NA | NA |
| NM_015530    | GORASP2  | 0.424352567014993 | 0                   | 2.00E-04 | 1 | 0.0014 | 0 | NA | NA |
| NM_001244710 | GFPT1    | 0.424352567014993 | 0                   | 2.00E-04 | 1 | 0.0014 | 0 | NA | NA |
| NM_002056    | GFPT1    | 0.424352567014993 | 0                   | 2.00E-04 | 1 | 0.0014 | 0 | NA | NA |
| NR_026970    | LY86-AS1 | 0.424352567014993 | 0                   | 2.00E-04 | 1 | 0.0014 | 0 | NA | NA |
| NM_001004474 | OR10S1   | 0.423898228078146 | 0                   | 2.00E-04 | 1 | 0.0014 | 0 | NA | NA |
| NM_153182    | MINA     | 0.422080872330759 | 0                   | 2.00E-04 | 1 | 0.0014 | 0 | NA | NA |
| NM_001042533 | MINA     | 0.422080872330759 | 0                   | 2.00E-04 | 1 | 0.0014 | 0 | NA | NA |
| NM_032778    | MINA     | 0.422080872330759 | 0                   | 2.00E-04 | 1 | 0.0014 | 0 | NA | NA |
| NM_001261829 | MINA     | 0.422080872330759 | 0                   | 2.00E-04 | 1 | 0.0014 | 0 | NA | NA |
| NM_001001827 | OR2T35   | 0.421172194457065 | 0                   | 2.00E-04 | 1 | 0.0014 | 0 | NA | NA |
| NM_017561    | NUTM2F   | 0.421172194457065 | 0                   | 2.00E-04 | 1 | 0.0014 | 0 | NA | NA |
| NM_001135592 | RPS27A   | 0.425715583825534 | 0.00545206724216265 | 2.00E-04 | 1 | 0.0014 | 0 | NA | NA |
| NR_026756    | CYP4F35P | 0.420263516583371 | 0                   | 2.00E-04 | 1 | 0.0014 | 0 | NA | NA |
| NM_002537    | OAZ2     | 0.419809177646524 | 0                   | 2.00E-04 | 1 | 0.0014 | 0 | NA | NA |
| NM_005314    | GRPR     | 0.419354838709677 | 0                   | 2.00E-04 | 1 | 0.0014 | 0 | NA | NA |
| NM_001012264 | RNASE13  | 0.418900499772831 | 0                   | 2.00E-04 | 1 | 0.0014 | 0 | NA | NA |
| NM_002277    | KRT31    | 0.418900499772831 | 0                   | 2.00E-04 | 1 | 0.0014 | 0 | NA | NA |
| NM_030901    | OR7A17   | 0.418446160835984 | 0                   | 2.00E-04 | 1 | 0.0014 | 0 | NA | NA |
| NM_016945    | TAS2R16  | 0.417991821899137 | 0                   | 2.00E-04 | 1 | 0.0014 | 0 | NA | NA |
| NM_198503    | KCNT2    | 0.41753748296229  | 0                   | 2.00E-04 | 1 | 0.0014 | 0 | NA | NA |
| NM_002144    | HOXB1    | 0.41753748296229  | 0                   | 2.00E-04 | 1 | 0.0014 | 0 | NA | NA |
| NM_001105206 | LAMA4    | 0.41753748296229  | 0                   | 2.00E-04 | 1 | 0.0014 | 0 | NA | NA |
| NM_001105207 | LAMA4    | 0.41753748296229  | 0                   | 2.00E-04 | 1 | 0.0014 | 0 | NA | NA |
| NM_002290    | LAMA4    | 0.41753748296229  | 0                   | 2.00E-04 | 1 | 0.0014 | 0 | NA | NA |
| NM_001105209 | LAMA4    | 0.41753748296229  | 0                   | 2.00E-04 | 1 | 0.0014 | 0 | NA | NA |
| NM_001105208 | LAMA4    | 0.41753748296229  | 0                   | 2.00E-04 | 1 | 0.0014 | 0 | NA | NA |
| NM_003532    | HIST1H3E | 0.417083144025443 | 0                   | 2.00E-04 | 1 | 0.0014 | 0 | NA | NA |
| NM_000689    | ALDH1A1  | 0.416174466151749 | 0                   | 2.00E-04 | 1 | 0.0014 | 0 | NA | NA |
| NM_004803    | SLC22A14 | 0.415265788278055 | 0                   | 2.00E-04 | 1 | 0.0014 | 0 | NA | NA |
| NM_019045    | WDR44    | 0.415265788278055 | 0                   | 2.00E-04 | 1 | 0.0014 | 0 | NA | NA |
| NM_001184966 | WDR44    | 0.415265788278055 | 0                   | 2.00E-04 | 1 | 0.0014 | 0 | NA | NA |

|              |            |                   |                     |          |   |        |   |    |    |
|--------------|------------|-------------------|---------------------|----------|---|--------|---|----|----|
| NM_001184965 | WDR44      | 0.415265788278055 | 0                   | 2.00E-04 | 1 | 0.0014 | 0 | NA | NA |
| NM_020964    | EPG5       | 0.415265788278055 | 0                   | 2.00E-04 | 1 | 0.0014 | 0 | NA | NA |
| NR_001435    | HLA-DPB2   | 0.414811449341209 | 0                   | 2.00E-04 | 1 | 0.0014 | 0 | NA | NA |
| NM_003265    | TLR3       | 0.414357110404362 | 0                   | 2.00E-04 | 1 | 0.0014 | 0 | NA | NA |
| NR_045126    | RAET1E-AS1 | 0.414357110404362 | 0                   | 2.00E-04 | 1 | 0.0014 | 0 | NA | NA |
| NM_001007527 | LMBRD2     | 0.414357110404362 | 0                   | 2.00E-04 | 1 | 0.0014 | 0 | NA | NA |
| NM_001163334 | SYTL5      | 0.413902771467515 | 0                   | 2.00E-04 | 1 | 0.0014 | 0 | NA | NA |
| NM_001282445 | EHD1       | 0.413902771467515 | 0                   | 2.00E-04 | 1 | 0.0014 | 0 | NA | NA |
| NM_001282444 | EHD1       | 0.413902771467515 | 0                   | 2.00E-04 | 1 | 0.0014 | 0 | NA | NA |
| NM_001199189 | CCNH       | 0.413902771467515 | 0                   | 2.00E-04 | 1 | 0.0014 | 0 | NA | NA |
| NM_001239    | CCNH       | 0.413902771467515 | 0                   | 2.00E-04 | 1 | 0.0014 | 0 | NA | NA |
| NM_001004756 | OR51M1     | 0.413448432530668 | 0                   | 2.00E-04 | 1 | 0.0014 | 0 | NA | NA |
| NM_001267572 | TBC1D2     | 0.413448432530668 | 0                   | 2.00E-04 | 1 | 0.0014 | 0 | NA | NA |
| NM_014960    | ARSG       | 0.412994093593821 | 0                   | 2.00E-04 | 1 | 0.0014 | 0 | NA | NA |
| NR_002309    | RPS26P11   | 0.412994093593821 | 0                   | 2.00E-04 | 1 | 0.0014 | 0 | NA | NA |
| NM_032424    | MSANTD4    | 0.542480690595184 | 0.129486597001363   | 2.00E-04 | 1 | 0.0014 | 0 | NA | NA |
| NM_182620    | SKA2       | 0.412994093593821 | 0                   | 2.00E-04 | 1 | 0.0014 | 0 | NA | NA |
| NM_001100595 | SKA2       | 0.412994093593821 | 0                   | 2.00E-04 | 1 | 0.0014 | 0 | NA | NA |
| NM_005002    | NDUFA9     | 0.412539754656974 | 0                   | 2.00E-04 | 1 | 0.0014 | 0 | NA | NA |
| NM_033670    | CCNB3      | 0.412085415720127 | 0                   | 2.00E-04 | 1 | 0.0014 | 0 | NA | NA |
| NM_033031    | CCNB3      | 0.412085415720127 | 0                   | 2.00E-04 | 1 | 0.0014 | 0 | NA | NA |
| NM_005747    | CELA3A     | 0.41163107678328  | 0                   | 2.00E-04 | 1 | 0.0014 | 0 | NA | NA |
| NM_001040702 | DEFB104B   | 0.41163107678328  | 0                   | 2.00E-04 | 1 | 0.0014 | 0 | NA | NA |
| NM_080389    | DEFB104A   | 0.41163107678328  | 0                   | 2.00E-04 | 1 | 0.0014 | 0 | NA | NA |
| NM_006295    | VARS       | 0.41163107678328  | 0                   | 2.00E-04 | 1 | 0.0014 | 0 | NA | NA |
| NM_153699    | GSTA5      | 0.447523852794184 | 0.0358927760109041  | 2.00E-04 | 1 | 0.0014 | 0 | NA | NA |
| NM_006499    | LGALS8     | 0.410722398909587 | 0                   | 2.00E-04 | 1 | 0.0014 | 0 | NA | NA |
| NM_201543    | LGALS8     | 0.410722398909587 | 0                   | 2.00E-04 | 1 | 0.0014 | 0 | NA | NA |
| NM_201544    | LGALS8     | 0.410722398909587 | 0                   | 2.00E-04 | 1 | 0.0014 | 0 | NA | NA |
| NM_001037732 | DEFB128    | 0.410722398909587 | 0                   | 2.00E-04 | 1 | 0.0014 | 0 | NA | NA |
| NM_001004052 | ORS2B2     | 0.41026805997274  | 0                   | 2.00E-04 | 1 | 0.0014 | 0 | NA | NA |
| NM_001689    | ATP5G3     | 0.41026805997274  | 0                   | 2.00E-04 | 1 | 0.0014 | 0 | NA | NA |
| NM_001190329 | ATP5G3     | 0.41026805997274  | 0                   | 2.00E-04 | 1 | 0.0014 | 0 | NA | NA |
| NM_001160046 | SGOL2      | 0.412085415720127 | 0.00181735574738755 | 2.00E-04 | 1 | 0.0014 | 0 | NA | NA |
| NM_001160033 | SGOL2      | 0.412085415720127 | 0.00181735574738755 | 2.00E-04 | 1 | 0.0014 | 0 | NA | NA |
| NM_152524    | SGOL2      | 0.412085415720127 | 0.00181735574738755 | 2.00E-04 | 1 | 0.0014 | 0 | NA | NA |
| NM_002510    | GPNMB      | 0.409813721035893 | 0                   | 2.00E-04 | 1 | 0.0014 | 0 | NA | NA |
| NM_001005340 | GPNMB      | 0.409813721035893 | 0                   | 2.00E-04 | 1 | 0.0014 | 0 | NA | NA |
| NM_002100    | GYPB       | 0.409813721035893 | 0                   | 2.00E-04 | 1 | 0.0014 | 0 | NA | NA |
| NM_201453    | CBWD3      | 0.409813721035893 | 0                   | 2.00E-04 | 1 | 0.0014 | 0 | NA | NA |
| NM_020372    | SLC22A17   | 0.409359382099046 | 0                   | 2.00E-04 | 1 | 0.0014 | 0 | NA | NA |
| NM_032260    | RGPD5      | 0.409359382099046 | 0                   | 2.00E-04 | 1 | 0.0014 | 0 | NA | NA |
| NM_001017992 | ACTBL2     | 0.408905043162199 | 0                   | 2.00E-04 | 1 | 0.0014 | 0 | NA | NA |
| NR_037481    | MIR3917    | 0.407542026351658 | 0                   | 2.00E-04 | 1 | 0.0014 | 0 | NA | NA |

|              |               |                   |                    |          |        |        |          |    |    |
|--------------|---------------|-------------------|--------------------|----------|--------|--------|----------|----|----|
| NM_001024916 | CBWD5         | 0.407087687414811 | 0                  | 2.00E-04 | 1      | 0.0014 | 0        | NA | NA |
| NM_014982    | PCNX          | 0.406633348477965 | 0                  | 2.00E-04 | 1      | 0.0014 | 0        | NA | NA |
| NM_001258423 | SMS           | 0.406633348477965 | 0                  | 2.00E-04 | 1      | 0.0014 | 0        | NA | NA |
| NM_004595    | SMS           | 0.406633348477965 | 0                  | 2.00E-04 | 1      | 0.0014 | 0        | NA | NA |
| NM_014329    | EDC4          | 0.406179009541118 | 0                  | 2.00E-04 | 1      | 0.0014 | 0        | NA | NA |
| NM_172311    | STON1-GTF2A1L | 0.406179009541118 | 0                  | 2.00E-04 | 1      | 0.0014 | 0        | NA | NA |
| NM_147199    | MRGPRX1       | 0.406179009541118 | 0                  | 2.00E-04 | 1      | 0.0014 | 0        | NA | NA |
| NM_001252383 | CGA           | 0.406179009541118 | 0                  | 2.00E-04 | 1      | 0.0014 | 0        | NA | NA |
| NM_000735    | CGA           | 0.406179009541118 | 0                  | 2.00E-04 | 1      | 0.0014 | 0        | NA | NA |
| NM_005905    | SMAD9         | 0.405724670604271 | 0                  | 2.00E-04 | 1      | 0.0014 | 0        | NA | NA |
| NM_001127217 | SMAD9         | 0.405724670604271 | 0                  | 2.00E-04 | 1      | 0.0014 | 0        | NA | NA |
| NM_001271983 | C11orf44      | 0.405270331667424 | 0                  | 2.00E-04 | 1      | 0.0014 | 0        | NA | NA |
| NR_033909    | ECRP          | 0.405270331667424 | 0                  | 2.00E-04 | 1      | 0.0014 | 0        | NA | NA |
| NM_001257964 | BOD1L2        | 0.405270331667424 | 0                  | 2.00E-04 | 1      | 0.0014 | 0        | NA | NA |
| NM_212555    | PATE2         | 0.40436165379373  | 0                  | 2.00E-04 | 1      | 0.0014 | 0        | NA | NA |
| NR_046249    | GM140         | 0.402998636983189 | 0                  | 2.00E-04 | 1      | 0.0014 | 0        | NA | NA |
| NM_130897    | DYNLRB2       | 0.402998636983189 | 0                  | 2.00E-04 | 1      | 0.0014 | 0        | NA | NA |
| NM_001638    | APOF          | 0.402544298046343 | 0                  | 2.00E-04 | 1      | 0.0014 | 0        | NA | NA |
| NM_173492    | PIP5KL1       | 0.402544298046343 | 0                  | 2.00E-04 | 1      | 0.0014 | 0        | NA | NA |
| NM_012475    | USP21         | 0.402089959109496 | 0                  | 2.00E-04 | 1      | 0.0014 | 0        | NA | NA |
| NM_001014443 | USP21         | 0.402089959109496 | 0                  | 2.00E-04 | 1      | 0.0014 | 0        | NA | NA |
| NM_198562    | C3orf62       | 0.402089959109496 | 0                  | 2.00E-04 | 1      | 0.0014 | 0        | NA | NA |
| NM_001200001 | NOTCH2        | 0.401635620172649 | 0                  | 2.00E-04 | 1      | 0.0014 | 0        | NA | NA |
| NM_024408    | NOTCH2        | 0.401635620172649 | 0                  | 2.00E-04 | 1      | 0.0014 | 0        | NA | NA |
| NM_001937    | DPT           | 0.401181281235802 | 0                  | 2.00E-04 | 1      | 0.0014 | 0        | NA | NA |
| NM_018384    | GIMAP5        | 0.400726942298955 | 0                  | 2.00E-04 | 1      | 0.0014 | 0        | NA | NA |
| NR_103537    | FAM87A        | 0.400726942298955 | 0                  | 2.00E-04 | 1      | 0.0014 | 0        | NA | NA |
| NM_001040283 | DMRTC2        | 0.400272603362108 | 0                  | 0.026    | 0.9754 | 0.3397 | 0.0051   | NA | NA |
| NM_022138    | SMOC2         | 0.400272603362108 | 0                  | 2.00E-04 | 1      | 0.0014 | 0        | NA | NA |
| NM_001166412 | SMOC2         | 0.400272603362108 | 0                  | 2.00E-04 | 1      | 0.0014 | 0        | NA | NA |
| NR_073116    | SERPINE2      | 0.400272603362108 | 0                  | 2.00E-04 | 1      | 0.0014 | 0        | NA | NA |
| NM_170665    | ATP2A2        | 0.414357110404362 | 0.0149931849159473 | 2.00E-04 | 1      | 0.0014 | 0        | NA | NA |
| NM_001681    | ATP2A2        | 0.414357110404362 | 0.0149931849159473 | 2.00E-04 | 1      | 0.0014 | 0        | NA | NA |
| NM_031457    | MS4A8         | 0.399363925488414 | 0                  | 2.00E-04 | 1      | 0.0014 | 0        | NA | NA |
| NR_026543    | C21orf88      | 0.399363925488414 | 0                  | 2.00E-04 | 1      | 0.0014 | 0        | NA | NA |
| NR_026542    | C21orf88      | 0.399363925488414 | 0                  | 2.00E-04 | 1      | 0.0014 | 0        | NA | NA |
| NM_022788    | P2RY12        | 0.399363925488414 | 0                  | 2.00E-04 | 1      | 0.0014 | 0        | NA | NA |
| NM_004073    | PLK3          | 0.397546569741027 | 0                  | 2.00E-04 | 1      | 0.0014 | 0        | NA | NA |
| NM_153013    | NADK2         | 0.39709223080418  | 0                  | 2.00E-04 | 1      | 0.0014 | 0        | NA | NA |
| NM_001243392 | SLC6A13       | 0.396637891867333 | 0                  | 2.00E-04 | 1      | 0.0014 | 0        | NA | NA |
| NM_001190997 | SLC6A13       | 0.396637891867333 | 0                  | 2.00E-04 | 1      | 0.0014 | 0        | NA | NA |
| NM_016615    | SLC6A13       | 0.396637891867333 | 0                  | 2.00E-04 | 1      | 0.0014 | 0        | NA | NA |
| NM_014864    | FAM20B        | 0.396183552930486 | 0                  | 2.00E-04 | 1      | 0.0014 | 0        | NA | NA |
| NR_046228    | ANKRD20A12P   | 0.396183552930486 | 0                  | 0.001    | 0.9988 | 0.0104 | 2.00E-04 | NA | NA |

|              |             |                   |                      |          |   |        |   |    |    |
|--------------|-------------|-------------------|----------------------|----------|---|--------|---|----|----|
| NR_001589    | HBBP1       | 0.396183552930486 | 0                    | 2.00E-04 | 1 | 0.0014 | 0 | NA | NA |
| NM_017581    | CHRNA9      | 0.395729213993639 | 0                    | 2.00E-04 | 1 | 0.0014 | 0 | NA | NA |
| NM_198277    | SLC37A2     | 0.395274875056792 | 0                    | 2.00E-04 | 1 | 0.0014 | 0 | NA | NA |
| NM_001145290 | SLC37A2     | 0.395274875056792 | 0                    | 2.00E-04 | 1 | 0.0014 | 0 | NA | NA |
| NR_024022    | SETMAR      | 0.394820536119945 | 0                    | 2.00E-04 | 1 | 0.0014 | 0 | NA | NA |
| NM_181604    | KRTAP6-2    | 0.394820536119945 | 0                    | 2.00E-04 | 1 | 0.0014 | 0 | NA | NA |
| NM_001295    | CCR1        | 0.394820536119945 | 0                    | 2.00E-04 | 1 | 0.0014 | 0 | NA | NA |
| NR_027068    | EFCAB10     | 0.394366197183099 | 0                    | 2.00E-04 | 1 | 0.0014 | 0 | NA | NA |
| NR_044994    | CTAGE7P     | 0.393911858246252 | 0                    | 2.00E-04 | 1 | 0.0014 | 0 | NA | NA |
| NM_018654    | GPRC5D      | 0.393911858246252 | 0                    | 2.00E-04 | 1 | 0.0014 | 0 | NA | NA |
| NM_002524    | NRAS        | 0.393457519309405 | 0                    | 2.00E-04 | 1 | 0.0014 | 0 | NA | NA |
| NM_001145474 | TEX38       | 0.393003180372558 | 0                    | 2.00E-04 | 1 | 0.0014 | 0 | NA | NA |
| NM_015404    | DFNB31      | 0.393003180372558 | 0                    | 2.00E-04 | 1 | 0.0014 | 0 | NA | NA |
| NM_001173425 | DFNB31      | 0.393003180372558 | 0                    | 2.00E-04 | 1 | 0.0014 | 0 | NA | NA |
| NM_001164436 | TMEM212     | 0.392548841435711 | 0                    | 2.00E-04 | 1 | 0.0014 | 0 | NA | NA |
| NM_001172704 | GGA3        | 0.392094502498864 | 0                    | 2.00E-04 | 1 | 0.0014 | 0 | NA | NA |
| NR_033345    | GGA3        | 0.392094502498864 | 0                    | 2.00E-04 | 1 | 0.0014 | 0 | NA | NA |
| NM_014001    | GGA3        | 0.392094502498864 | 0                    | 2.00E-04 | 1 | 0.0014 | 0 | NA | NA |
| NM_001172703 | GGA3        | 0.392094502498864 | 0                    | 2.00E-04 | 1 | 0.0014 | 0 | NA | NA |
| NM_138619    | GGA3        | 0.392094502498864 | 0                    | 2.00E-04 | 1 | 0.0014 | 0 | NA | NA |
| NM_006408    | AGR2        | 0.391640163562017 | 0                    | 2.00E-04 | 1 | 0.0014 | 0 | NA | NA |
| NM_000710    | BDKRB1      | 0.390731485688323 | 0                    | 2.00E-04 | 1 | 0.0014 | 0 | NA | NA |
| NM_017622    | C17orf59    | 0.390277146751477 | 0                    | 2.00E-04 | 1 | 0.0014 | 0 | NA | NA |
| NR_002940    | LRR37A4P    | 0.390277146751477 | 0                    | 2.00E-04 | 1 | 0.0014 | 0 | NA | NA |
| NM_001207006 | IL21        | 0.38982280781463  | 0                    | 2.00E-04 | 1 | 0.0014 | 0 | NA | NA |
| NM_021803    | IL21        | 0.38982280781463  | 0                    | 2.00E-04 | 1 | 0.0014 | 0 | NA | NA |
| NR_028323    | SLC5A6      | 0.38982280781463  | 0.000454338936846888 | 2.00E-04 | 1 | 0.0014 | 0 | NA | NA |
| NM_021095    | SLC5A6      | 0.38982280781463  | 0.000454338936846888 | 2.00E-04 | 1 | 0.0014 | 0 | NA | NA |
| NM_020808    | SIPA1L2     | 0.389368468877783 | 0                    | 2.00E-04 | 1 | 0.0014 | 0 | NA | NA |
| NM_003768    | PEA15       | 0.388914129940936 | 0                    | 2.00E-04 | 1 | 0.0014 | 0 | NA | NA |
| NM_001123376 | TMEM72      | 0.388914129940936 | 0                    | 2.00E-04 | 1 | 0.0014 | 0 | NA | NA |
| NR_027486    | TBC1D3P2    | 0.388914129940936 | 0                    | 2.00E-04 | 1 | 0.0014 | 0 | NA | NA |
| NR_024373    | MIR4435-1HG | 0.388914129940936 | 0                    | 2.00E-04 | 1 | 0.0014 | 0 | NA | NA |
| NR_015395    | MIR4435-1HG | 0.388914129940936 | 0                    | 2.00E-04 | 1 | 0.0014 | 0 | NA | NA |
| NM_147191    | MMP21       | 0.392548841435711 | 0.0036347114947751   | 2.00E-04 | 1 | 0.0014 | 0 | NA | NA |
| NR_046365    | FAM90A27P   | 0.388459791004089 | 0                    | 2.00E-04 | 1 | 0.0014 | 0 | NA | NA |
| NM_001004351 | SPDYE3      | 0.388005452067242 | 0                    | 2.00E-04 | 1 | 0.0014 | 0 | NA | NA |
| NM_004615    | TSPAN7      | 0.388005452067242 | 0                    | 2.00E-04 | 1 | 0.0014 | 0 | NA | NA |
| NM_005421    | TAL2        | 0.387551113130395 | 0                    | 2.00E-04 | 1 | 0.0014 | 0 | NA | NA |
| NM_198515    | CCDC172     | 0.518855065879146 | 0.131758291685597    | 2.00E-04 | 1 | 0.0014 | 0 | NA | NA |
| NM_198485    | TPRG1       | 0.387096774193548 | 0                    | 2.00E-04 | 1 | 0.0014 | 0 | NA | NA |
| NM_170610    | HIST1H2BA   | 0.387096774193548 | 0                    | 2.00E-04 | 1 | 0.0014 | 0 | NA | NA |
| NM_025221    | KCNIP4      | 0.387096774193548 | 0                    | 2.00E-04 | 1 | 0.0014 | 0 | NA | NA |
| NM_014011    | SOCS5       | 0.386642435256701 | 0                    | 2.00E-04 | 1 | 0.0014 | 0 | NA | NA |

|              |             |                   |   |          |          |        |        |    |    |
|--------------|-------------|-------------------|---|----------|----------|--------|--------|----|----|
| NM_144949    | SOCS5       | 0.386642435256701 | 0 | 2.00E-04 | 1        | 0.0014 | 0      | NA | NA |
| NM_012450    | SLC13A4     | 0.386642435256701 | 0 | 2.00E-04 | 1        | 0.0014 | 0      | NA | NA |
| NM_015971    | MRPS7       | 0.386188096319855 | 0 | 2.00E-04 | 1        | 0.0014 | 0      | NA | NA |
| NM_002548    | OR1D2       | 0.386188096319855 | 0 | 2.00E-04 | 1        | 0.0014 | 0      | NA | NA |
| NM_019119    | PCDHB9      | 0.385733757383008 | 0 | 2.00E-04 | 1        | 0.0014 | 0      | NA | NA |
| NM_020398    | EPPIN       | 0.385733757383008 | 0 | 2.00E-04 | 1        | 0.0014 | 0      | NA | NA |
| NM_001198986 | EPPIN-WFDC6 | 0.385733757383008 | 0 | 2.00E-04 | 1        | 0.0014 | 0      | NA | NA |
| NM_205859    | OR2K2       | 0.385733757383008 | 0 | 2.00E-04 | 1        | 0.0014 | 0      | NA | NA |
| NM_175734    | C17orf74    | 0.385279418446161 | 0 | 2.00E-04 | 1        | 0.0014 | 0      | NA | NA |
| NM_001007563 | IGFBPL1     | 0.385279418446161 | 0 | 2.00E-04 | 1        | 0.0014 | 0      | NA | NA |
| NM_022167    | XYLT2       | 0.384825079509314 | 0 | 2.00E-04 | 1        | 0.0014 | 0      | NA | NA |
| NM_001201428 | GORASP2     | 0.384370740572467 | 0 | 2.00E-04 | 1        | 0.0014 | 0      | NA | NA |
| NM_173800    | AQPEP       | 0.384370740572467 | 0 | 2.00E-04 | 1        | 0.0014 | 0      | NA | NA |
| NM_002286    | LAG3        | 0.383462062698773 | 0 | 2.00E-04 | 1        | 0.0014 | 0      | NA | NA |
| NM_001001413 | GOLGA6L1    | 0.383462062698773 | 0 | 2.00E-04 | 1        | 0.0014 | 0      | NA | NA |
| NM_001159709 | BTNL8       | 0.383462062698773 | 0 | 2.00E-04 | 1        | 0.0014 | 0      | NA | NA |
| NM_001040462 | BTNL8       | 0.383462062698773 | 0 | 2.00E-04 | 1        | 0.0014 | 0      | NA | NA |
| NM_001159707 | BTNL8       | 0.383462062698773 | 0 | 2.00E-04 | 1        | 0.0014 | 0      | NA | NA |
| NM_001159708 | BTNL8       | 0.383462062698773 | 0 | 2.00E-04 | 1        | 0.0014 | 0      | NA | NA |
| NM_024850    | BTNL8       | 0.383462062698773 | 0 | 2.00E-04 | 1        | 0.0014 | 0      | NA | NA |
| NM_001270584 | IQCA1       | 0.383462062698773 | 0 | 2.00E-04 | 0.9998   | 0.0014 | 0      | NA | NA |
| NM_024726    | IQCA1       | 0.383462062698773 | 0 | 2.00E-04 | 1        | 0.0014 | 0      | NA | NA |
| NR_073043    | IQCA1       | 0.383462062698773 | 0 | 2.00E-04 | 1        | 0.0014 | 0      | NA | NA |
| NM_001005189 | OR6Y1       | 0.383007723761926 | 0 | 2.00E-04 | 1        | 0.0014 | 0      | NA | NA |
| NM_001130834 | LDB2        | 0.383007723761926 | 0 | 2.00E-04 | 1        | 0.0014 | 0      | NA | NA |
| NM_001290    | LDB2        | 0.383007723761926 | 0 | 2.00E-04 | 1        | 0.0014 | 0      | NA | NA |
| NM_024870    | PREX2       | 0.38255338482508  | 0 | 2.00E-04 | 1        | 0.0014 | 0      | NA | NA |
| NM_025170    | PREX2       | 0.38255338482508  | 0 | 2.00E-04 | 1        | 0.0014 | 0      | NA | NA |
| NM_001242329 | USP17L5     | 0.382099045888233 | 0 | 1        | 2.00E-04 | 1      | 0.1626 | NA | NA |
| NR_036691    | LOC494127   | 0.381644706951386 | 0 | 2.00E-04 | 1        | 0.0014 | 0      | NA | NA |
| NM_001171092 | CLDN2       | 0.380736029077692 | 0 | 2.00E-04 | 1        | 0.0014 | 0      | NA | NA |
| NM_001025205 | AP2M1       | 0.380281690140845 | 0 | 2.00E-04 | 1        | 0.0014 | 0      | NA | NA |
| NM_004068    | AP2M1       | 0.380281690140845 | 0 | 2.00E-04 | 1        | 0.0014 | 0      | NA | NA |
| NM_001270524 | OTX2        | 0.380281690140845 | 0 | 2.00E-04 | 1        | 0.0014 | 0      | NA | NA |
| NM_001270523 | OTX2        | 0.380281690140845 | 0 | 2.00E-04 | 1        | 0.0014 | 0      | NA | NA |
| NM_021728    | OTX2        | 0.380281690140845 | 0 | 2.00E-04 | 1        | 0.0014 | 0      | NA | NA |
| NR_073034    | OTX2        | 0.380281690140845 | 0 | 2.00E-04 | 1        | 0.0014 | 0      | NA | NA |
| NM_015042    | ZNF609      | 0.379827351203998 | 0 | 2.00E-04 | 1        | 0.0014 | 0      | NA | NA |
| NM_001001674 | OR4F15      | 0.379827351203998 | 0 | 2.00E-04 | 1        | 0.0014 | 0      | NA | NA |
| NM_001001964 | OR2T11      | 0.379827351203998 | 0 | 2.00E-04 | 1        | 0.0014 | 0      | NA | NA |
| NM_005468    | NAALADL1    | 0.379827351203998 | 0 | 2.00E-04 | 1        | 0.0014 | 0      | NA | NA |
| NM_000042    | APOH        | 0.379827351203998 | 0 | 2.00E-04 | 1        | 0.0014 | 0      | NA | NA |
| NR_024240    | HLA-J       | 0.379373012267151 | 0 | 2.00E-04 | 1        | 0.0014 | 0      | NA | NA |
| NM_005272    | GNAT2       | 0.378009995456611 | 0 | 2.00E-04 | 1        | 0.0014 | 0      | NA | NA |

|              |           |                   |                    |          |   |        |          |    |    |
|--------------|-----------|-------------------|--------------------|----------|---|--------|----------|----|----|
| NM_014895    | KIAA1009  | 0.378009995456611 | 0                  | 2.00E-04 | 1 | 0.0014 | 0        | NA | NA |
| NM_001376    | DYNC1H1   | 0.405270331667424 | 0.0272603362108133 | 2.00E-04 | 1 | 0.0014 | 0        | NA | NA |
| NM_002289    | LALBA     | 0.377555656519764 | 0                  | 2.00E-04 | 1 | 0.0014 | 0        | NA | NA |
| NR_024206    | LINC00152 | 0.377101317582917 | 0                  | 2.00E-04 | 1 | 0.0014 | 0        | NA | NA |
| NR_024205    | LINC00152 | 0.377101317582917 | 0                  | 2.00E-04 | 1 | 0.0014 | 0        | NA | NA |
| NR_024204    | LINC00152 | 0.377101317582917 | 0                  | 2.00E-04 | 1 | 0.0014 | 0        | NA | NA |
| NM_030636    | EEPD1     | 0.377101317582917 | 0                  | 2.00E-04 | 1 | 0.0014 | 0        | NA | NA |
| NM_152577    | ZNF645    | 0.377101317582917 | 0                  | 2.00E-04 | 1 | 0.0014 | 0        | NA | NA |
| NM_001004486 | OR13H1    | 0.377101317582917 | 0                  | 2.00E-04 | 1 | 0.0014 | 0        | NA | NA |
| NM_001278297 | FAM131B   | 0.377101317582917 | 0                  | 2.00E-04 | 1 | 0.0014 | 0        | NA | NA |
| NM_001031690 | FAM131B   | 0.377101317582917 | 0                  | 2.00E-04 | 1 | 0.0014 | 0        | NA | NA |
| NM_001099638 | ZNF146    | 0.376192639709223 | 0                  | 2.00E-04 | 1 | 0.0014 | 0        | NA | NA |
| NM_007145    | ZNF146    | 0.376192639709223 | 0                  | 2.00E-04 | 1 | 0.0014 | 0        | NA | NA |
| NM_001099639 | ZNF146    | 0.376192639709223 | 0                  | 2.00E-04 | 1 | 0.0014 | 0        | NA | NA |
| NM_015886    | PI15      | 0.376192639709223 | 0                  | 2.00E-04 | 1 | 0.0014 | 0        | NA | NA |
| NM_001289    | CLIC2     | 0.376192639709223 | 0                  | 2.00E-04 | 1 | 0.0014 | 0        | NA | NA |
| NM_018715    | RCC2      | 0.374829622898682 | 0                  | 2.00E-04 | 1 | 0.0014 | 0        | NA | NA |
| NM_017456    | CYTH1     | 0.374829622898682 | 0                  | 2.00E-04 | 1 | 0.0014 | 0        | NA | NA |
| NM_004762    | CYTH1     | 0.374829622898682 | 0                  | 2.00E-04 | 1 | 0.0014 | 0        | NA | NA |
| NM_013286    | RBM15B    | 0.374375283961836 | 0                  | 2.00E-04 | 1 | 0.0014 | 0        | NA | NA |
| NM_170745    | HIST1H2AA | 0.374375283961836 | 0                  | 2.00E-04 | 1 | 0.0014 | 0        | NA | NA |
| NM_000452    | SLC10A2   | 0.373012267151295 | 0                  | 2.00E-04 | 1 | 0.0014 | 0        | NA | NA |
| NM_001130725 | PSMB5     | 0.373012267151295 | 0                  | 2.00E-04 | 1 | 0.0014 | 0        | NA | NA |
| NR_002442    | SNORD18B  | 0.416174466151749 | 0.0431621990004543 | 2.00E-04 | 1 | 0.0014 | 0        | NA | NA |
| NM_000074    | CD40LG    | 0.372103589277601 | 0                  | 2.00E-04 | 1 | 0.0014 | 0        | NA | NA |
| NM_020864    | NYAP2     | 0.371649250340754 | 0                  | 2.00E-04 | 1 | 0.0014 | 0        | NA | NA |
| NM_001199742 | GADD45A   | 0.371194911403907 | 0                  | 2.00E-04 | 1 | 0.0014 | 0        | NA | NA |
| NM_001199741 | GADD45A   | 0.371194911403907 | 0                  | 2.00E-04 | 1 | 0.0014 | 0        | NA | NA |
| NM_001924    | GADD45A   | 0.371194911403907 | 0                  | 2.00E-04 | 1 | 0.0014 | 0        | NA | NA |
| NM_001251962 | ARHGEF26  | 0.371194911403907 | 0                  | 2.00E-04 | 1 | 0.0014 | 0        | NA | NA |
| NM_001002258 | ATP5G3    | 0.371194911403907 | 0                  | 2.00E-04 | 1 | 0.0014 | 0        | NA | NA |
| NM_001080477 | TENM3     | 0.37074057246706  | 0                  | 4.00E-04 | 1 | 0.0038 | 1.00E-04 | NA | NA |
| NM_004696    | SLC16A4   | 0.37074057246706  | 0                  | 2.00E-04 | 1 | 0.0014 | 0        | NA | NA |
| NM_001201546 | SLC16A4   | 0.37074057246706  | 0                  | 2.00E-04 | 1 | 0.0014 | 0        | NA | NA |
| NM_001201549 | SLC16A4   | 0.37074057246706  | 0                  | 2.00E-04 | 1 | 0.0014 | 0        | NA | NA |
| NM_001201548 | SLC16A4   | 0.37074057246706  | 0                  | 2.00E-04 | 1 | 0.0014 | 0        | NA | NA |
| NM_001201547 | SLC16A4   | 0.37074057246706  | 0                  | 2.00E-04 | 1 | 0.0014 | 0        | NA | NA |
| NM_006291    | TNFAIP2   | 0.370286233530214 | 0                  | 2.00E-04 | 1 | 0.0014 | 0        | NA | NA |
| NM_001079807 | PGA3      | 0.36937755565652  | 0                  | 2.00E-04 | 1 | 0.0014 | 0        | NA | NA |
| NR_027695    | DSCR10    | 0.36937755565652  | 0                  | 2.00E-04 | 1 | 0.0014 | 0        | NA | NA |
| NM_080913    | ASGR2     | 0.36937755565652  | 0                  | 2.00E-04 | 1 | 0.0014 | 0        | NA | NA |
| NM_001181    | ASGR2     | 0.36937755565652  | 0                  | 2.00E-04 | 1 | 0.0014 | 0        | NA | NA |
| NM_001201352 | ASGR2     | 0.36937755565652  | 0                  | 2.00E-04 | 1 | 0.0014 | 0        | NA | NA |
| NM_080912    | ASGR2     | 0.36937755565652  | 0                  | 2.00E-04 | 1 | 0.0014 | 0        | NA | NA |



|              |           |                   |                    |          |        |        |          |    |    |
|--------------|-----------|-------------------|--------------------|----------|--------|--------|----------|----|----|
| NM_017521    | FEV       | 0.36937755565652  | 0                  | 2.00E-04 | 1      | 0.0014 | 0        | NA | NA |
| NM_001077203 | SENP7     | 0.36937755565652  | 0                  | 2.00E-04 | 1      | 0.0014 | 0        | NA | NA |
| NM_001282801 | SENP7     | 0.36937755565652  | 0                  | 2.00E-04 | 1      | 0.0014 | 0        | NA | NA |
| NM_001282802 | SENP7     | 0.36937755565652  | 0                  | 2.00E-04 | 1      | 0.0014 | 0        | NA | NA |
| NM_001282803 | SENP7     | 0.36937755565652  | 0                  | 2.00E-04 | 1      | 0.0014 | 0        | NA | NA |
| NM_020654    | SENP7     | 0.36937755565652  | 0                  | 2.00E-04 | 1      | 0.0014 | 0        | NA | NA |
| NM_001282804 | SENP7     | 0.36937755565652  | 0                  | 2.00E-04 | 1      | 0.0014 | 0        | NA | NA |
| NM_199290    | NACA2     | 0.368014538845979 | 0                  | 2.00E-04 | 1      | 0.0014 | 0        | NA | NA |
| NM_000722    | CACNA2D1  | 0.367560199909132 | 0                  | 2.00E-04 | 1      | 0.0014 | 0        | NA | NA |
| NM_181491    | MED22     | 0.551567469332122 | 0.18400726942299   | 2.00E-04 | 1      | 0.0014 | 0        | NA | NA |
| NM_133640    | MED22     | 0.551567469332122 | 0.18400726942299   | 2.00E-04 | 1      | 0.0014 | 0        | NA | NA |
| NM_031962    | KRTAP9-3  | 0.367105860972285 | 0                  | 2.00E-04 | 1      | 0.0014 | 0        | NA | NA |
| NM_014867    | KBTD11    | 0.367105860972285 | 0                  | 2.00E-04 | 1      | 0.0014 | 0        | NA | NA |
| NM_001584    | MPPED2    | 0.367105860972285 | 0                  | 4.00E-04 | 0.9992 | 0.0038 | 1.00E-04 | NA | NA |
| NM_018158    | SLC4A1AP  | 0.366651522035438 | 0                  | 2.00E-04 | 1      | 0.0014 | 0        | NA | NA |
| NM_021221    | LY6G5B    | 0.366651522035438 | 0                  | 2.00E-04 | 1      | 0.0014 | 0        | NA | NA |
| NR_038274    | LINC00933 | 0.475692866878692 | 0.109950022716947  | 2.00E-04 | 1      | 0.0014 | 0        | NA | NA |
| NR_004859    | SCAND2P   | 0.365742844161745 | 0                  | 2.00E-04 | 1      | 0.0014 | 0        | NA | NA |
| NR_003654    | SCAND2P   | 0.365742844161745 | 0                  | 2.00E-04 | 1      | 0.0014 | 0        | NA | NA |
| NM_000288    | PEX7      | 0.365742844161745 | 0                  | 2.00E-04 | 1      | 0.0014 | 0        | NA | NA |
| NM_006271    | S100A1    | 0.364834166288051 | 0                  | 2.00E-04 | 1      | 0.0014 | 0        | NA | NA |
| NM_002929    | GRK1      | 0.364834166288051 | 0                  | 2.00E-04 | 1      | 0.0014 | 0        | NA | NA |
| NR_038120    | ELMO1     | 0.441617446615175 | 0.0772376192639709 | 2.00E-04 | 1      | 0.0014 | 0        | NA | NA |
| NM_130442    | ELMO1     | 0.441617446615175 | 0.0772376192639709 | 2.00E-04 | 1      | 0.0014 | 0        | NA | NA |
| NM_016630    | SPG21     | 0.364379827351204 | 0                  | 2.00E-04 | 1      | 0.0014 | 0        | NA | NA |
| NM_001127890 | SPG21     | 0.364379827351204 | 0                  | 2.00E-04 | 1      | 0.0014 | 0        | NA | NA |
| NM_003936    | CDK5R2    | 0.368014538845979 | 0.0036347114947751 | 2.00E-04 | 1      | 0.0014 | 0        | NA | NA |
| NM_032448    | FAM120B   | 0.363925488414357 | 0                  | 2.00E-04 | 1      | 0.0014 | 0        | NA | NA |
| NM_001130679 | EIF4E     | 0.363925488414357 | 0                  | 2.00E-04 | 1      | 0.0014 | 0        | NA | NA |
| NM_001968    | EIF4E     | 0.363925488414357 | 0                  | 2.00E-04 | 1      | 0.0014 | 0        | NA | NA |
| NM_004341    | CAD       | 0.36347114947751  | 0                  | 2.00E-04 | 1      | 0.0014 | 0        | NA | NA |
| NM_017750    | RETSAT    | 0.362562471603816 | 0                  | 2.00E-04 | 1      | 0.0014 | 0        | NA | NA |
| NM_002177    | IFNW1     | 0.362562471603816 | 0                  | 2.00E-04 | 1      | 0.0014 | 0        | NA | NA |
| NM_001005169 | ORS2I1    | 0.361653793730123 | 0                  | 2.00E-04 | 1      | 0.0014 | 0        | NA | NA |
| NM_021255    | PELI2     | 0.361653793730123 | 0                  | 2.00E-04 | 1      | 0.0014 | 0        | NA | NA |
| NM_018992    | KCTD5     | 0.361653793730123 | 0                  | 2.00E-04 | 1      | 0.0014 | 0        | NA | NA |
| NM_001258029 | GSN       | 0.361653793730123 | 0                  | 2.00E-04 | 1      | 0.0014 | 0        | NA | NA |
| NM_000608    | ORM2      | 0.361199454793276 | 0                  | 2.00E-04 | 1      | 0.0014 | 0        | NA | NA |
| NM_015840    | ADAR      | 0.361199454793276 | 0                  | 2.00E-04 | 1      | 0.0014 | 0        | NA | NA |
| NM_001111    | ADAR      | 0.361199454793276 | 0                  | 2.00E-04 | 1      | 0.0014 | 0        | NA | NA |
| NM_015841    | ADAR      | 0.361199454793276 | 0                  | 2.00E-04 | 1      | 0.0014 | 0        | NA | NA |
| NM_001284353 | KIAA1324  | 0.360745115856429 | 0                  | 2.00E-04 | 1      | 0.0014 | 0        | NA | NA |
| NR_049774    | KIAA1324  | 0.360745115856429 | 0                  | 2.00E-04 | 1      | 0.0014 | 0        | NA | NA |
| NM_001975    | ENO2      | 0.360745115856429 | 0                  | 2.00E-04 | 1      | 0.0014 | 0        | NA | NA |

|              |              |                   |                     |          |        |        |   |    |    |
|--------------|--------------|-------------------|---------------------|----------|--------|--------|---|----|----|
| NM_144988    | ALG14        | 0.360745115856429 | 0                   | 2.00E-04 | 1      | 0.0014 | 0 | NA | NA |
| NR_033697    | NDUFA2       | 0.360745115856429 | 0                   | 2.00E-04 | 1      | 0.0014 | 0 | NA | NA |
| NM_002488    | NDUFA2       | 0.360745115856429 | 0                   | 2.00E-04 | 1      | 0.0014 | 0 | NA | NA |
| NM_001185012 | NDUFA2       | 0.360745115856429 | 0                   | 2.00E-04 | 1      | 0.0014 | 0 | NA | NA |
| NR_003015    | SNORA53      | 0.360290776919582 | 0                   | 2.00E-04 | 1      | 0.0014 | 0 | NA | NA |
| NM_177976    | ARL6         | 0.360290776919582 | 0                   | 2.00E-04 | 1      | 0.0014 | 0 | NA | NA |
| NM_032146    | ARL6         | 0.360290776919582 | 0                   | 2.00E-04 | 1      | 0.0014 | 0 | NA | NA |
| NM_001278293 | ARL6         | 0.360290776919582 | 0                   | 2.00E-04 | 1      | 0.0014 | 0 | NA | NA |
| NR_103511    | ARL6         | 0.360290776919582 | 0                   | 2.00E-04 | 1      | 0.0014 | 0 | NA | NA |
| NM_194251    | GPR151       | 0.360290776919582 | 0                   | 2.00E-04 | 1      | 0.0014 | 0 | NA | NA |
| NM_001278702 | SSX2B        | 0.360290776919582 | 0                   | 2.00E-04 | 0.9998 | 0.0014 | 0 | NA | NA |
| NM_001030005 | CPLX3        | 0.359836437982735 | 0                   | 2.00E-04 | 1      | 0.0014 | 0 | NA | NA |
| NM_001203246 | GPBP1        | 0.359836437982735 | 0                   | 2.00E-04 | 1      | 0.0014 | 0 | NA | NA |
| NM_022913    | GPBP1        | 0.359836437982735 | 0                   | 2.00E-04 | 1      | 0.0014 | 0 | NA | NA |
| NM_001145121 | TCP10L2      | 0.359836437982735 | 0                   | 2.00E-04 | 1      | 0.0014 | 0 | NA | NA |
| NM_001278697 | SSX2         | 0.359836437982735 | 0                   | 2.00E-04 | 0.9994 | 0.0014 | 0 | NA | NA |
| NM_005832    | KCNMB2       | 0.359382099045888 | 0                   | 2.00E-04 | 1      | 0.0014 | 0 | NA | NA |
| NM_001278911 | KCNMB2       | 0.359382099045888 | 0                   | 2.00E-04 | 1      | 0.0014 | 0 | NA | NA |
| NR_040085    | TRG-AS1      | 0.359382099045888 | 0                   | 2.00E-04 | 1      | 0.0014 | 0 | NA | NA |
| NM_020154    | EMC7         | 0.358927760109041 | 0                   | 2.00E-04 | 1      | 0.0014 | 0 | NA | NA |
| NM_001491    | GCNT2        | 0.487505679236711 | 0.129032258064516   | 2.00E-04 | 1      | 0.0014 | 0 | NA | NA |
| NM_000623    | BDKRB2       | 0.358473421172194 | 0                   | 2.00E-04 | 1      | 0.0014 | 0 | NA | NA |
| NM_198512    | DGAT2L6      | 0.358473421172194 | 0                   | 2.00E-04 | 1      | 0.0014 | 0 | NA | NA |
| NM_024928    | OBFC1        | 0.358473421172194 | 0                   | 2.00E-04 | 1      | 0.0014 | 0 | NA | NA |
| NM_001253357 | TIE1         | 0.357564743298501 | 0                   | 2.00E-04 | 1      | 0.0014 | 0 | NA | NA |
| NM_005424    | TIE1         | 0.357564743298501 | 0                   | 2.00E-04 | 1      | 0.0014 | 0 | NA | NA |
| NM_014062    | NOB1         | 0.512039981826443 | 0.154929577464789   | 2.00E-04 | 1      | 0.0014 | 0 | NA | NA |
| NR_074074    | NOB1         | 0.512039981826443 | 0.154929577464789   | 2.00E-04 | 1      | 0.0014 | 0 | NA | NA |
| NM_005514    | HLA-B        | 0.356656065424807 | 0                   | 2.00E-04 | 1      | 0.0014 | 0 | NA | NA |
| NM_001144966 | NEDD4L       | 0.355747387551113 | 0                   | 2.00E-04 | 1      | 0.0014 | 0 | NA | NA |
| NM_207422    | FLJ44635     | 0.358927760109041 | 0.00318037255792821 | 2.00E-04 | 1      | 0.0014 | 0 | NA | NA |
| NM_017425    | SPA17        | 0.355293048614266 | 0                   | 2.00E-04 | 1      | 0.0014 | 0 | NA | NA |
| NM_006181    | NTN3         | 0.355293048614266 | 0                   | 2.00E-04 | 1      | 0.0014 | 0 | NA | NA |
| NM_001942    | DSG1         | 0.355293048614266 | 0                   | 2.00E-04 | 1      | 0.0014 | 0 | NA | NA |
| NR_034145    | LINC00670    | 0.354838709677419 | 0                   | 2.00E-04 | 1      | 0.0014 | 0 | NA | NA |
| NR_034144    | LINC00670    | 0.354838709677419 | 0                   | 2.00E-04 | 1      | 0.0014 | 0 | NA | NA |
| NM_000427    | LOR          | 0.354384370740572 | 0                   | 2.00E-04 | 1      | 0.0014 | 0 | NA | NA |
| NR_103774    | LOC100289580 | 0.354384370740572 | 0                   | 2.00E-04 | 1      | 0.0014 | 0 | NA | NA |
| NM_002865    | RAB2A        | 0.354384370740572 | 0                   | 2.00E-04 | 1      | 0.0014 | 0 | NA | NA |
| NM_001242644 | RAB2A        | 0.354384370740572 | 0                   | 2.00E-04 | 1      | 0.0014 | 0 | NA | NA |
| NM_138636    | TLR8         | 0.354384370740572 | 0                   | 2.00E-04 | 1      | 0.0014 | 0 | NA | NA |
| NM_014870    | ZBTB40       | 0.454793275783735 | 0.100863243980009   | 2.00E-04 | 1      | 0.0014 | 0 | NA | NA |
| NM_001083621 | ZBTB40       | 0.454793275783735 | 0.100863243980009   | 2.00E-04 | 1      | 0.0014 | 0 | NA | NA |
| NM_138357    | MCU          | 0.353930031803726 | 0                   | 2.00E-04 | 1      | 0.0014 | 0 | NA | NA |

|              |           |                   |                    |          |   |        |   |    |    |
|--------------|-----------|-------------------|--------------------|----------|---|--------|---|----|----|
| NR_073062    | MCU       | 0.353930031803726 | 0                  | 2.00E-04 | 1 | 0.0014 | 0 | NA | NA |
| NM_001270680 | MCU       | 0.353930031803726 | 0                  | 2.00E-04 | 1 | 0.0014 | 0 | NA | NA |
| NM_001270679 | MCU       | 0.353930031803726 | 0                  | 2.00E-04 | 1 | 0.0014 | 0 | NA | NA |
| NM_152880    | PTK7      | 0.353930031803726 | 0                  | 2.00E-04 | 1 | 0.0014 | 0 | NA | NA |
| NM_152882    | PTK7      | 0.353930031803726 | 0                  | 2.00E-04 | 1 | 0.0014 | 0 | NA | NA |
| NM_152881    | PTK7      | 0.353930031803726 | 0                  | 2.00E-04 | 1 | 0.0014 | 0 | NA | NA |
| NM_002821    | PTK7      | 0.353930031803726 | 0                  | 2.00E-04 | 1 | 0.0014 | 0 | NA | NA |
| NR_072998    | PTK7      | 0.353930031803726 | 0                  | 2.00E-04 | 1 | 0.0014 | 0 | NA | NA |
| NR_072997    | PTK7      | 0.353930031803726 | 0                  | 2.00E-04 | 1 | 0.0014 | 0 | NA | NA |
| NM_014790    | JAKMIP2   | 0.353930031803726 | 0                  | 2.00E-04 | 1 | 0.0014 | 0 | NA | NA |
| NM_001270934 | JAKMIP2   | 0.353930031803726 | 0                  | 2.00E-04 | 1 | 0.0014 | 0 | NA | NA |
| NM_001270941 | JAKMIP2   | 0.353930031803726 | 0                  | 2.00E-04 | 1 | 0.0014 | 0 | NA | NA |
| NM_001282282 | JAKMIP2   | 0.353930031803726 | 0                  | 2.00E-04 | 1 | 0.0014 | 0 | NA | NA |
| NM_052872    | IL17F     | 0.353475692866879 | 0                  | 2.00E-04 | 1 | 0.0014 | 0 | NA | NA |
| NM_005235    | ERBB4     | 0.353021353930032 | 0                  | 2.00E-04 | 1 | 0.0014 | 0 | NA | NA |
| NM_001042599 | ERBB4     | 0.353021353930032 | 0                  | 2.00E-04 | 1 | 0.0014 | 0 | NA | NA |
| NM_181676    | PPP2R2B   | 0.353021353930032 | 0                  | 2.00E-04 | 1 | 0.0014 | 0 | NA | NA |
| NM_181674    | PPP2R2B   | 0.353021353930032 | 0                  | 2.00E-04 | 1 | 0.0014 | 0 | NA | NA |
| NM_020798    | USP35     | 0.352567014993185 | 0                  | 2.00E-04 | 1 | 0.0014 | 0 | NA | NA |
| NM_005417    | SRC       | 0.352567014993185 | 0                  | 2.00E-04 | 1 | 0.0014 | 0 | NA | NA |
| NM_014935    | PLEKHA6   | 0.352567014993185 | 0                  | 2.00E-04 | 1 | 0.0014 | 0 | NA | NA |
| NM_004006    | DMD       | 0.352112676056338 | 0                  | 2.00E-04 | 1 | 0.0014 | 0 | NA | NA |
| NR_024359    | LINC00086 | 0.351658337119491 | 0                  | 2.00E-04 | 1 | 0.0014 | 0 | NA | NA |
| NM_014482    | BMP10     | 0.351658337119491 | 0                  | 2.00E-04 | 1 | 0.0014 | 0 | NA | NA |
| NM_001163148 | ETV1      | 0.448432530667878 | 0.0967741935483871 | 2.00E-04 | 1 | 0.0014 | 0 | NA | NA |
| NM_145910    | NEK11     | 0.351203998182644 | 0                  | 2.00E-04 | 1 | 0.0014 | 0 | NA | NA |
| NM_001146003 | NEK11     | 0.351203998182644 | 0                  | 2.00E-04 | 1 | 0.0014 | 0 | NA | NA |
| NM_024800    | NEK11     | 0.351203998182644 | 0                  | 2.00E-04 | 1 | 0.0014 | 0 | NA | NA |
| NM_001195685 | LYPD6     | 0.36210813266697  | 0.0113584734211722 | 2.00E-04 | 1 | 0.0014 | 0 | NA | NA |
| NR_046020    | TMPRSS3   | 0.350749659245797 | 0                  | 2.00E-04 | 1 | 0.0014 | 0 | NA | NA |
| NM_001134403 | CYB561D1  | 0.35029532030895  | 0                  | 2.00E-04 | 1 | 0.0014 | 0 | NA | NA |
| NM_001134402 | CYB561D1  | 0.35029532030895  | 0                  | 2.00E-04 | 1 | 0.0014 | 0 | NA | NA |
| NM_001134404 | CYB561D1  | 0.35029532030895  | 0                  | 2.00E-04 | 1 | 0.0014 | 0 | NA | NA |
| NM_182580    | CYB561D1  | 0.35029532030895  | 0                  | 2.00E-04 | 1 | 0.0014 | 0 | NA | NA |
| NM_001134400 | CYB561D1  | 0.35029532030895  | 0                  | 2.00E-04 | 1 | 0.0014 | 0 | NA | NA |
| NM_001006939 | LRRC18    | 0.349840981372104 | 0                  | 2.00E-04 | 1 | 0.0014 | 0 | NA | NA |
| NM_022436    | ABCG5     | 0.349386642435257 | 0                  | 2.00E-04 | 1 | 0.0014 | 0 | NA | NA |
| NM_000381    | MID1      | 0.349386642435257 | 0                  | 2.00E-04 | 1 | 0.0014 | 0 | NA | NA |
| NM_033289    | MID1      | 0.349386642435257 | 0                  | 2.00E-04 | 1 | 0.0014 | 0 | NA | NA |
| NM_138967    | SCAMP5    | 0.34893230349841  | 0                  | 2.00E-04 | 1 | 0.0014 | 0 | NA | NA |
| NM_001178112 | SCAMP5    | 0.34893230349841  | 0                  | 2.00E-04 | 1 | 0.0014 | 0 | NA | NA |
| NR_033660    | SCAMP5    | 0.34893230349841  | 0                  | 2.00E-04 | 1 | 0.0014 | 0 | NA | NA |
| NM_001178111 | SCAMP5    | 0.34893230349841  | 0                  | 2.00E-04 | 1 | 0.0014 | 0 | NA | NA |
| NM_173536    | GABRG1    | 0.34893230349841  | 0                  | 2.00E-04 | 1 | 0.0014 | 0 | NA | NA |

|              |          |                   |                    |          |        |        |          |    |    |
|--------------|----------|-------------------|--------------------|----------|--------|--------|----------|----|----|
| NM_023039    | ANKRA2   | 0.34893230349841  | 0                  | 2.00E-04 | 1      | 0.0014 | 0        | NA | NA |
| NM_003887    | ASAP2    | 0.348477964561563 | 0                  | 2.00E-04 | 1      | 0.0014 | 0        | NA | NA |
| NM_001135191 | ASAP2    | 0.348477964561563 | 0                  | 2.00E-04 | 1      | 0.0014 | 0        | NA | NA |
| NM_002578    | PAK3     | 0.348477964561563 | 0                  | 0.0082   | 0.993  | 0.0741 | 0.0017   | NA | NA |
| NM_004781    | VAMP3    | 0.348023625624716 | 0                  | 2.00E-04 | 1      | 0.0014 | 0        | NA | NA |
| NM_001040084 | ANXA8    | 0.348023625624716 | 0                  | 2.00E-04 | 1      | 0.0014 | 0        | NA | NA |
| NM_001271703 | ANXA8    | 0.348023625624716 | 0                  | 2.00E-04 | 1      | 0.0014 | 0        | NA | NA |
| NM_001271702 | ANXA8    | 0.348023625624716 | 0                  | 2.00E-04 | 1      | 0.0014 | 0        | NA | NA |
| NM_000301    | PLG      | 0.347569286687869 | 0                  | 2.00E-04 | 1      | 0.0014 | 0        | NA | NA |
| NM_001168338 | PLG      | 0.347569286687869 | 0                  | 2.00E-04 | 1      | 0.0014 | 0        | NA | NA |
| NR_103778    | FLG-AS1  | 0.347114947751022 | 0                  | 2.00E-04 | 1      | 0.0014 | 0        | NA | NA |
| NM_001271014 | KTN1     | 0.503861880963199 | 0.157201272149023  | 2.00E-04 | 1      | 0.0014 | 0        | NA | NA |
| NM_001079521 | KTN1     | 0.503861880963199 | 0.157201272149023  | 2.00E-04 | 1      | 0.0014 | 0        | NA | NA |
| NM_004986    | KTN1     | 0.503861880963199 | 0.157201272149023  | 2.00E-04 | 1      | 0.0014 | 0        | NA | NA |
| NM_001079522 | KTN1     | 0.503861880963199 | 0.157201272149023  | 2.00E-04 | 1      | 0.0014 | 0        | NA | NA |
| NR_073129    | KTN1     | 0.503861880963199 | 0.157201272149023  | 2.00E-04 | 1      | 0.0014 | 0        | NA | NA |
| NR_073128    | KTN1     | 0.503861880963199 | 0.157201272149023  | 2.00E-04 | 1      | 0.0014 | 0        | NA | NA |
| NM_001244676 | THNSL2   | 0.346660608814175 | 0                  | 0.0018   | 0.9998 | 0.0126 | 4.00E-04 | NA | NA |
| NM_001244678 | THNSL2   | 0.346660608814175 | 0                  | 4.00E-04 | 0.9996 | 0.0038 | 1.00E-04 | NA | NA |
| NM_016568    | RXFP3    | 0.346660608814175 | 0                  | 2.00E-04 | 1      | 0.0014 | 0        | NA | NA |
| NM_001040704 | DEFB106B | 0.346660608814175 | 0                  | 2.00E-04 | 1      | 0.0014 | 0        | NA | NA |
| NM_152251    | DEFB106A | 0.346660608814175 | 0                  | 2.00E-04 | 1      | 0.0014 | 0        | NA | NA |
| NM_001164507 | NEB      | 0.345751930940482 | 0                  | 2.00E-04 | 1      | 0.0014 | 0        | NA | NA |
| NM_001271208 | NEB      | 0.345751930940482 | 0                  | 2.00E-04 | 1      | 0.0014 | 0        | NA | NA |
| NM_001164508 | NEB      | 0.345751930940482 | 0                  | 2.00E-04 | 1      | 0.0014 | 0        | NA | NA |
| NM_004543    | NEB      | 0.345751930940482 | 0                  | 2.00E-04 | 1      | 0.0014 | 0        | NA | NA |
| NR_033702    | MYNN     | 0.345297592003635 | 0                  | 2.00E-04 | 1      | 0.0014 | 0        | NA | NA |
| NM_001185118 | MYNN     | 0.345297592003635 | 0                  | 2.00E-04 | 1      | 0.0014 | 0        | NA | NA |
| NR_033703    | MYNN     | 0.345297592003635 | 0                  | 2.00E-04 | 1      | 0.0014 | 0        | NA | NA |
| NM_018657    | MYNN     | 0.345297592003635 | 0                  | 2.00E-04 | 1      | 0.0014 | 0        | NA | NA |
| NM_173520    | C9orf62  | 0.345297592003635 | 0                  | 0.0084   | 1      | 0.0741 | 0.0017   | NA | NA |
| NM_016215    | EGFL7    | 0.345297592003635 | 0                  | 0.0022   | 0.9976 | 0.0173 | 5.00E-04 | NA | NA |
| NR_045110    | EGFL7    | 0.345297592003635 | 0                  | 0.0024   | 0.9976 | 0.0173 | 5.00E-04 | NA | NA |
| NR_045111    | EGFL7    | 0.345297592003635 | 0                  | 0.0026   | 0.9982 | 0.0173 | 5.00E-04 | NA | NA |
| NM_152586    | USP54    | 0.345297592003635 | 0                  | 2.00E-04 | 1      | 0.0014 | 0        | NA | NA |
| NM_030958    | SLC05A1  | 0.344843253066788 | 0                  | 2.00E-04 | 1      | 0.0014 | 0        | NA | NA |
| NM_153226    | SLC35G1  | 0.422535211267606 | 0.0781462971376647 | 4.00E-04 | 0.9992 | 0.0038 | 1.00E-04 | NA | NA |
| NM_001134658 | SLC35G1  | 0.422535211267606 | 0.0781462971376647 | 4.00E-04 | 1      | 0.0038 | 1.00E-04 | NA | NA |
| NM_007062    | PWP1     | 0.344388914129941 | 0                  | 2.00E-04 | 1      | 0.0014 | 0        | NA | NA |
| NM_130436    | DYRK1A   | 0.344388914129941 | 0                  | 2.00E-04 | 1      | 0.0014 | 0        | NA | NA |
| NM_207444    | C15orf53 | 0.343934575193094 | 0                  | 2.00E-04 | 1      | 0.0014 | 0        | NA | NA |
| NM_015035    | ZHX3     | 0.343934575193094 | 0                  | 2.00E-04 | 1      | 0.0014 | 0        | NA | NA |
| NM_198889    | ANKRD17  | 0.343934575193094 | 0                  | 2.00E-04 | 1      | 0.0014 | 0        | NA | NA |
| NM_032217    | ANKRD17  | 0.343934575193094 | 0                  | 2.00E-04 | 1      | 0.0014 | 0        | NA | NA |

|              |                |                   |                     |          |          |        |          |    |    |
|--------------|----------------|-------------------|---------------------|----------|----------|--------|----------|----|----|
| NR_046416    | USP17L9P       | 0.343480236256247 | 0                   | 1        | 2.00E-04 | 1      | 0.1626   | NA | NA |
| NM_001164459 | ACTR3C         | 0.343480236256247 | 0                   | 2.00E-04 | 1        | 0.0014 | 0        | NA | NA |
| NM_212559    | XKRX           | 0.343480236256247 | 0                   | 2.00E-04 | 1        | 0.0014 | 0        | NA | NA |
| NM_000773    | CYP2E1         | 0.3430258973194   | 0                   | 2.00E-04 | 0.9998   | 0.0014 | 0        | NA | NA |
| NM_001007026 | ATN1           | 0.3430258973194   | 0                   | 2.00E-04 | 1        | 0.0014 | 0        | NA | NA |
| NM_001256855 | USP17L13       | 0.3430258973194   | 0                   | 1        | 2.00E-04 | 1      | 0.1626   | NA | NA |
| NM_001256857 | USP17L17       | 0.3430258973194   | 0                   | 1        | 2.00E-04 | 1      | 0.1626   | NA | NA |
| NR_027279    | USP17L6P       | 0.3430258973194   | 0                   | 1        | 2.00E-04 | 1      | 0.1626   | NA | NA |
| NM_000990    | RPL27A         | 0.346206269877328 | 0.00318037255792821 | 2.00E-04 | 1        | 0.0014 | 0        | NA | NA |
| NM_020995    | HPR            | 0.342571558382553 | 0                   | 2.00E-04 | 1        | 0.0014 | 0        | NA | NA |
| NM_178828    | SPATA31E1      | 0.342571558382553 | 0                   | 2.00E-04 | 1        | 0.0014 | 0        | NA | NA |
| NM_001080500 | VWC2L          | 0.342117219445706 | 0                   | 2.00E-04 | 1        | 0.0014 | 0        | NA | NA |
| NM_001114619 | MGAT1          | 0.342117219445706 | 0                   | 2.00E-04 | 1        | 0.0014 | 0        | NA | NA |
| NM_001114620 | MGAT1          | 0.342117219445706 | 0                   | 8.00E-04 | 1        | 0.0046 | 2.00E-04 | NA | NA |
| NM_001040448 | DEFB131        | 0.34166288050886  | 0                   | 2.00E-04 | 1        | 0.0014 | 0        | NA | NA |
| NM_001004452 | OR1J4          | 0.34166288050886  | 0                   | 2.00E-04 | 1        | 0.0014 | 0        | NA | NA |
| NM_001496    | GFRA3          | 0.34166288050886  | 0                   | 2.00E-04 | 1        | 0.0014 | 0        | NA | NA |
| NM_001281746 | MLIP           | 0.341208541572013 | 0                   | 2.00E-04 | 1        | 0.0014 | 0        | NA | NA |
| NM_138569    | MLIP           | 0.341208541572013 | 0                   | 2.00E-04 | 1        | 0.0014 | 0        | NA | NA |
| NM_001195396 | ARL4A          | 0.341208541572013 | 0                   | 2.00E-04 | 1        | 0.0014 | 0        | NA | NA |
| NM_005738    | ARL4A          | 0.341208541572013 | 0                   | 2.00E-04 | 1        | 0.0014 | 0        | NA | NA |
| NM_212460    | ARL4A          | 0.341208541572013 | 0                   | 2.00E-04 | 1        | 0.0014 | 0        | NA | NA |
| NM_001037164 | ARL4A          | 0.341208541572013 | 0                   | 2.00E-04 | 1        | 0.0014 | 0        | NA | NA |
| NM_007160    | OR2H2          | 0.340754202635166 | 0                   | 2.00E-04 | 1        | 0.0014 | 0        | NA | NA |
| NR_026773    | C6orf123       | 0.340754202635166 | 0                   | 2.00E-04 | 1        | 0.0014 | 0        | NA | NA |
| NR_037873    | ZHX1           | 0.340754202635166 | 0                   | 2.00E-04 | 1        | 0.0014 | 0        | NA | NA |
| NM_173828    | RELL2          | 0.340299863698319 | 0                   | 2.00E-04 | 1        | 0.0014 | 0        | NA | NA |
| NM_001130029 | RELL2          | 0.340299863698319 | 0                   | 2.00E-04 | 1        | 0.0014 | 0        | NA | NA |
| NM_005723    | TSPAN5         | 0.340299863698319 | 0                   | 2.00E-04 | 1        | 0.0014 | 0        | NA | NA |
| NM_206852    | RTN1           | 0.339845524761472 | 0                   | 2.00E-04 | 1        | 0.0014 | 0        | NA | NA |
| NM_021013    | KRT34          | 0.339845524761472 | 0                   | 2.00E-04 | 1        | 0.0014 | 0        | NA | NA |
| NM_001037663 | EEF1B2         | 0.339391185824625 | 0                   | 2.00E-04 | 1        | 0.0014 | 0        | NA | NA |
| NM_021121    | EEF1B2         | 0.339391185824625 | 0                   | 2.00E-04 | 1        | 0.0014 | 0        | NA | NA |
| NM_001959    | EEF1B2         | 0.339391185824625 | 0                   | 2.00E-04 | 1        | 0.0014 | 0        | NA | NA |
| NM_001080976 | DSE            | 0.339391185824625 | 0                   | 2.00E-04 | 1        | 0.0014 | 0        | NA | NA |
| NM_001256497 | CYP3A7-CYP3AP1 | 0.339391185824625 | 0                   | 2.00E-04 | 1        | 0.0014 | 0        | NA | NA |
| NM_000765    | CYP3A7         | 0.339391185824625 | 0                   | 2.00E-04 | 1        | 0.0014 | 0        | NA | NA |
| NR_026900    | FLJ23867       | 0.338936846887778 | 0                   | 0.0026   | 1        | 0.0173 | 5.00E-04 | NA | NA |
| NM_001080533 | UNC119B        | 0.338936846887778 | 0                   | 2.00E-04 | 1        | 0.0014 | 0        | NA | NA |
| NM_001098494 | ZNF419         | 0.338936846887778 | 0                   | 2.00E-04 | 1        | 0.0014 | 0        | NA | NA |
| NM_001098496 | ZNF419         | 0.338936846887778 | 0                   | 2.00E-04 | 1        | 0.0014 | 0        | NA | NA |
| NM_001098495 | ZNF419         | 0.338936846887778 | 0                   | 2.00E-04 | 1        | 0.0014 | 0        | NA | NA |
| NM_001098491 | ZNF419         | 0.338936846887778 | 0                   | 2.00E-04 | 1        | 0.0014 | 0        | NA | NA |
| NM_001098493 | ZNF419         | 0.338936846887778 | 0                   | 2.00E-04 | 1        | 0.0014 | 0        | NA | NA |

|              |          |                   |                      |          |        |        |        |    |    |
|--------------|----------|-------------------|----------------------|----------|--------|--------|--------|----|----|
| NM_001098492 | ZNF419   | 0.338936846887778 | 0                    | 2.00E-04 | 1      | 0.0014 | 0      | NA | NA |
| NM_024691    | ZNF419   | 0.338936846887778 | 0                    | 2.00E-04 | 1      | 0.0014 | 0      | NA | NA |
| NM_001727    | BRS3     | 0.338936846887778 | 0                    | 2.00E-04 | 1      | 0.0014 | 0      | NA | NA |
| NM_001005187 | OR6T1    | 0.338936846887778 | 0                    | 2.00E-04 | 1      | 0.0014 | 0      | NA | NA |
| NM_002797    | PSMB5    | 0.338936846887778 | 0                    | 2.00E-04 | 1      | 0.0014 | 0      | NA | NA |
| NM_001144932 | PSMB5    | 0.338936846887778 | 0                    | 2.00E-04 | 1      | 0.0014 | 0      | NA | NA |
| NR_003246    | GOLGA6L5 | 0.338936846887778 | 0                    | 2.00E-04 | 1      | 0.0014 | 0      | NA | NA |
| NM_001243144 | NUSAP1   | 0.338482507950931 | 0                    | 2.00E-04 | 1      | 0.0014 | 0      | NA | NA |
| NM_001243143 | NUSAP1   | 0.338482507950931 | 0                    | 2.00E-04 | 1      | 0.0014 | 0      | NA | NA |
| NM_018454    | NUSAP1   | 0.338482507950931 | 0                    | 2.00E-04 | 1      | 0.0014 | 0      | NA | NA |
| NM_001243142 | NUSAP1   | 0.338482507950931 | 0                    | 2.00E-04 | 1      | 0.0014 | 0      | NA | NA |
| NM_016359    | NUSAP1   | 0.338482507950931 | 0                    | 2.00E-04 | 1      | 0.0014 | 0      | NA | NA |
| NM_001085411 | NADK2    | 0.338482507950931 | 0                    | 2.00E-04 | 1      | 0.0014 | 0      | NA | NA |
| NM_020185    | DUSP22   | 0.338028169014085 | 0                    | 2.00E-04 | 1      | 0.0014 | 0      | NA | NA |
| NM_001023567 | GOLGA8B  | 0.360745115856429 | 0.0227169468423444   | 2.00E-04 | 1      | 0.0014 | 0      | NA | NA |
| NM_001167741 | MTX3     | 0.338028169014085 | 0.000454338936846888 | 2.00E-04 | 1      | 0.0014 | 0      | NA | NA |
| NM_001010891 | MTX3     | 0.338028169014085 | 0.000454338936846888 | 2.00E-04 | 1      | 0.0014 | 0      | NA | NA |
| NM_004842    | AKAP7    | 0.337573830077238 | 0                    | 2.00E-04 | 1      | 0.0014 | 0      | NA | NA |
| NM_138633    | AKAP7    | 0.337573830077238 | 0                    | 2.00E-04 | 1      | 0.0014 | 0      | NA | NA |
| NM_153747    | PIGC     | 0.337119491140391 | 0                    | 2.00E-04 | 1      | 0.0014 | 0      | NA | NA |
| NM_002642    | PIGC     | 0.337119491140391 | 0                    | 2.00E-04 | 1      | 0.0014 | 0      | NA | NA |
| NR_030600    | MIR190B  | 0.374829622898682 | 0.0377101317582917   | 0.0112   | 0.991  | 0.0741 | 0.0022 | NA | NA |
| NM_001159495 | BANF2    | 0.336665152203544 | 0                    | 2.00E-04 | 1      | 0.0014 | 0      | NA | NA |
| NM_001005339 | RGS10    | 0.336665152203544 | 0                    | 2.00E-04 | 1      | 0.0014 | 0      | NA | NA |
| NM_001503    | GPLD1    | 0.336665152203544 | 0                    | 2.00E-04 | 1      | 0.0014 | 0      | NA | NA |
| NM_203347    | LCN15    | 0.336665152203544 | 0                    | 2.00E-04 | 1      | 0.0014 | 0      | NA | NA |
| NM_001261419 | IL1R2    | 0.336210813266697 | 0                    | 0.0076   | 0.9894 | 0.0741 | 0.0015 | NA | NA |
| NM_004633    | IL1R2    | 0.336210813266697 | 0                    | 0.0084   | 0.991  | 0.0741 | 0.0017 | NA | NA |
| NM_001040282 | TBC1D3G  | 0.336210813266697 | 0                    | 2.00E-04 | 1      | 0.0014 | 0      | NA | NA |
| NM_001283035 | RTFDC1   | 0.33575647432985  | 0                    | 2.00E-04 | 1      | 0.0014 | 0      | NA | NA |
| NM_001283036 | RTFDC1   | 0.33575647432985  | 0                    | 2.00E-04 | 1      | 0.0014 | 0      | NA | NA |
| NM_001283037 | RTFDC1   | 0.33575647432985  | 0                    | 2.00E-04 | 1      | 0.0014 | 0      | NA | NA |
| NM_016407    | RTFDC1   | 0.33575647432985  | 0                    | 2.00E-04 | 1      | 0.0014 | 0      | NA | NA |
| NM_020741    | KIAA1257 | 0.33575647432985  | 0                    | 2.00E-04 | 1      | 0.0014 | 0      | NA | NA |
| NM_001035513 | SDHC     | 0.392094502498864 | 0.0563380281690141   | 2.00E-04 | 1      | 0.0014 | 0      | NA | NA |
| NM_001278172 | SDHC     | 0.392094502498864 | 0.0563380281690141   | 2.00E-04 | 1      | 0.0014 | 0      | NA | NA |
| NM_003001    | SDHC     | 0.392094502498864 | 0.0563380281690141   | 2.00E-04 | 1      | 0.0014 | 0      | NA | NA |
| NM_001035512 | SDHC     | 0.392094502498864 | 0.0563380281690141   | 2.00E-04 | 1      | 0.0014 | 0      | NA | NA |
| NM_001035511 | SDHC     | 0.392094502498864 | 0.0563380281690141   | 2.00E-04 | 1      | 0.0014 | 0      | NA | NA |
| NR_103459    | SDHC     | 0.392094502498864 | 0.0563380281690141   | 2.00E-04 | 1      | 0.0014 | 0      | NA | NA |
| NM_001190892 | PDYN     | 0.335302135393003 | 0                    | 2.00E-04 | 1      | 0.0014 | 0      | NA | NA |
| NM_198859    | PRICKLE2 | 0.334847796456156 | 0                    | 2.00E-04 | 1      | 0.0014 | 0      | NA | NA |
| NM_024768    | EFCC1    | 0.426624261699228 | 0.0922308041799182   | 2.00E-04 | 1      | 0.0014 | 0      | NA | NA |
| NM_005863    | NET1     | 0.334393457519309 | 0                    | 2.00E-04 | 1      | 0.0014 | 0      | NA | NA |

|              |              |                   |                     |          |        |        |        |    |    |
|--------------|--------------|-------------------|---------------------|----------|--------|--------|--------|----|----|
| NR_073040    | NET1         | 0.334393457519309 | 0                   | 2.00E-04 | 1      | 0.0014 | 0      | NA | NA |
| NM_006567    | FARS2        | 0.334393457519309 | 0                   | 2.00E-04 | 1      | 0.0014 | 0      | NA | NA |
| NM_001242673 | AHCYL1       | 0.333939118582463 | 0                   | 2.00E-04 | 1      | 0.0014 | 0      | NA | NA |
| NM_006621    | AHCYL1       | 0.333939118582463 | 0                   | 2.00E-04 | 1      | 0.0014 | 0      | NA | NA |
| NM_144614    | MBD3L2       | 0.333939118582463 | 0                   | 2.00E-04 | 1      | 0.0014 | 0      | NA | NA |
| NR_104162    | LOC283045    | 0.333939118582463 | 0                   | 2.00E-04 | 1      | 0.0014 | 0      | NA | NA |
| NM_001134672 | FAM204A      | 0.333939118582463 | 0                   | 2.00E-04 | 1      | 0.0014 | 0      | NA | NA |
| NM_022063    | FAM204A      | 0.333939118582463 | 0                   | 2.00E-04 | 1      | 0.0014 | 0      | NA | NA |
| NM_001190900 | PDYN         | 0.333939118582463 | 0                   | 2.00E-04 | 1      | 0.0014 | 0      | NA | NA |
| NR_024564    | LOC100130264 | 0.333939118582463 | 0                   | 2.00E-04 | 1      | 0.0014 | 0      | NA | NA |
| NR_036082    | MIR3132      | 0.3430258973194   | 0.00908677873693776 | 2.00E-04 | 1      | 0.0014 | 0      | NA | NA |
| NM_001025077 | CELF2        | 0.333484779645616 | 0                   | 2.00E-04 | 0.9998 | 0.0014 | 0      | NA | NA |
| NM_004426    | PHC1         | 0.333030440708769 | 0                   | 2.00E-04 | 1      | 0.0014 | 0      | NA | NA |
| NM_031451    | TEX101       | 0.333030440708769 | 0                   | 2.00E-04 | 1      | 0.0014 | 0      | NA | NA |
| NM_004771    | MMP20        | 0.333030440708769 | 0                   | 2.00E-04 | 1      | 0.0014 | 0      | NA | NA |
| NM_001281806 | FSD2         | 0.333030440708769 | 0                   | 2.00E-04 | 1      | 0.0014 | 0      | NA | NA |
| NM_001007122 | FSD2         | 0.333030440708769 | 0                   | 2.00E-04 | 1      | 0.0014 | 0      | NA | NA |
| NM_001281805 | FSD2         | 0.333030440708769 | 0                   | 2.00E-04 | 1      | 0.0014 | 0      | NA | NA |
| NM_001243429 | ERG          | 0.333030440708769 | 0                   | 2.00E-04 | 1      | 0.0014 | 0      | NA | NA |
| NM_001199573 | TRIM22       | 0.332121762835075 | 0                   | 2.00E-04 | 1      | 0.0014 | 0      | NA | NA |
| NM_006074    | TRIM22       | 0.332121762835075 | 0                   | 2.00E-04 | 1      | 0.0014 | 0      | NA | NA |
| NM_006993    | NPM3         | 0.332121762835075 | 0                   | 2.00E-04 | 1      | 0.0014 | 0      | NA | NA |
| NM_001033714 | NOP2         | 0.332121762835075 | 0                   | 2.00E-04 | 1      | 0.0014 | 0      | NA | NA |
| NM_001258310 | NOP2         | 0.332121762835075 | 0                   | 2.00E-04 | 1      | 0.0014 | 0      | NA | NA |
| NM_006170    | NOP2         | 0.332121762835075 | 0                   | 2.00E-04 | 1      | 0.0014 | 0      | NA | NA |
| NM_001258308 | NOP2         | 0.332121762835075 | 0                   | 2.00E-04 | 1      | 0.0014 | 0      | NA | NA |
| NM_001258309 | NOP2         | 0.332121762835075 | 0                   | 2.00E-04 | 1      | 0.0014 | 0      | NA | NA |
| NR_039904    | MIR4749      | 0.331667423898228 | 0                   | 2.00E-04 | 1      | 0.0014 | 0      | NA | NA |
| NM_198689    | KRTAP10-7    | 0.331667423898228 | 0                   | 2.00E-04 | 1      | 0.0014 | 0      | NA | NA |
| NR_026856    | LINC01011    | 0.331667423898228 | 0                   | 2.00E-04 | 1      | 0.0014 | 0      | NA | NA |
| NR_026855    | LINC01011    | 0.331667423898228 | 0                   | 2.00E-04 | 1      | 0.0014 | 0      | NA | NA |
| NM_002748    | MAPK6        | 0.331213084961381 | 0                   | 2.00E-04 | 1      | 0.0014 | 0      | NA | NA |
| NM_006687    | ACTL7A       | 0.331213084961381 | 0                   | 0.0128   | 0.9888 | 0.083  | 0.0026 | NA | NA |
| NM_001282645 | PRKCQ        | 0.331213084961381 | 0                   | 2.00E-04 | 1      | 0.0014 | 0      | NA | NA |
| NM_006257    | PRKCQ        | 0.331213084961381 | 0                   | 2.00E-04 | 1      | 0.0014 | 0      | NA | NA |
| NM_001282644 | PRKCQ        | 0.331213084961381 | 0                   | 2.00E-04 | 1      | 0.0014 | 0      | NA | NA |
| NM_001242413 | PRKCQ        | 0.331213084961381 | 0                   | 2.00E-04 | 1      | 0.0014 | 0      | NA | NA |
| NM_017611    | SLC43A3      | 0.331213084961381 | 0                   | 2.00E-04 | 1      | 0.0014 | 0      | NA | NA |
| NM_176822    | NLRP14       | 0.330758746024534 | 0                   | 2.00E-04 | 1      | 0.0014 | 0      | NA | NA |
| NM_080671    | KCNE4        | 0.330758746024534 | 0                   | 2.00E-04 | 1      | 0.0014 | 0      | NA | NA |
| NM_005193    | CDX4         | 0.330758746024534 | 0                   | 2.00E-04 | 1      | 0.0014 | 0      | NA | NA |
| NM_001080137 | CT47A10      | 0.480690595184007 | 0.149931849159473   | 2.00E-04 | 1      | 0.0014 | 0      | NA | NA |
| NM_001080146 | CT47A1       | 0.480690595184007 | 0.149931849159473   | 2.00E-04 | 1      | 0.0014 | 0      | NA | NA |
| NM_001080139 | CT47A8       | 0.480690595184007 | 0.149931849159473   | 2.00E-04 | 1      | 0.0014 | 0      | NA | NA |

|              |                  |                   |                   |          |        |        |          |    |    |
|--------------|------------------|-------------------|-------------------|----------|--------|--------|----------|----|----|
| NM_001080141 | <i>CT47A6</i>    | 0.480690595184007 | 0.149931849159473 | 2.00E-04 | 1      | 0.0014 | 0        | NA | NA |
| NM_001144929 | <i>NKIRAS2</i>   | 0.330304407087687 | 0                 | 2.00E-04 | 1      | 0.0014 | 0        | NA | NA |
| NM_001144928 | <i>NKIRAS2</i>   | 0.330304407087687 | 0                 | 2.00E-04 | 1      | 0.0014 | 0        | NA | NA |
| NM_001144927 | <i>NKIRAS2</i>   | 0.330304407087687 | 0                 | 2.00E-04 | 1      | 0.0014 | 0        | NA | NA |
| NM_017595    | <i>NKIRAS2</i>   | 0.330304407087687 | 0                 | 2.00E-04 | 1      | 0.0014 | 0        | NA | NA |
| NM_152765    | <i>C8orf46</i>   | 0.330304407087687 | 0                 | 2.00E-04 | 1      | 0.0014 | 0        | NA | NA |
| NM_001159642 | <i>BNIP1</i>     | 0.329850068150841 | 0                 | 2.00E-04 | 1      | 0.0014 | 0        | NA | NA |
| NM_138278    | <i>BNIP1</i>     | 0.329850068150841 | 0                 | 2.00E-04 | 1      | 0.0014 | 0        | NA | NA |
| NM_001160174 | <i>NAT1</i>      | 0.329395729213994 | 0                 | 2.00E-04 | 1      | 0.0014 | 0        | NA | NA |
| NM_012144    | <i>DNAI1</i>     | 0.329395729213994 | 0                 | 2.00E-04 | 1      | 0.0014 | 0        | NA | NA |
| NM_001281428 | <i>DNAI1</i>     | 0.329395729213994 | 0                 | 2.00E-04 | 1      | 0.0014 | 0        | NA | NA |
| NM_001122819 | <i>KIF17</i>     | 0.329395729213994 | 0                 | 2.00E-04 | 1      | 0.0014 | 0        | NA | NA |
| NM_020816    | <i>KIF17</i>     | 0.329395729213994 | 0                 | 2.00E-04 | 1      | 0.0014 | 0        | NA | NA |
| NM_002313    | <i>ABLIM1</i>    | 0.329395729213994 | 0                 | 2.00E-04 | 1      | 0.0014 | 0        | NA | NA |
| NM_001001802 | <i>OR2A42</i>    | 0.329395729213994 | 0                 | 2.00E-04 | 1      | 0.0014 | 0        | NA | NA |
| NR_003678    | <i>NCOR1P1</i>   | 0.328941390277147 | 0                 | 2.00E-04 | 1      | 0.0014 | 0        | NA | NA |
| NM_001193379 | <i>UCKL1</i>     | 0.328941390277147 | 0                 | 2.00E-04 | 1      | 0.0014 | 0        | NA | NA |
| NR_027287    | <i>UCKL1-AS1</i> | 0.3284870513403   | 0                 | 2.00E-04 | 1      | 0.0014 | 0        | NA | NA |
| NM_005325    | <i>HIST1H1A</i>  | 0.328032712403453 | 0                 | 2.00E-04 | 1      | 0.0014 | 0        | NA | NA |
| NM_017857    | <i>SSH3</i>      | 0.327578373466606 | 0                 | 2.00E-04 | 1      | 0.0014 | 0        | NA | NA |
| NM_183377    | <i>ASIC2</i>     | 0.327578373466606 | 0                 | 0.0056   | 0.9942 | 0.0554 | 0.0011   | NA | NA |
| NM_001025252 | <i>TPD52</i>     | 0.327578373466606 | 0                 | 2.00E-04 | 1      | 0.0014 | 0        | NA | NA |
| NM_175057    | <i>TAAR9</i>     | 0.327124034529759 | 0                 | 2.00E-04 | 1      | 0.0014 | 0        | NA | NA |
| NM_001081443 | <i>LILRB5</i>    | 0.327124034529759 | 0                 | 2.00E-04 | 1      | 0.0014 | 0        | NA | NA |
| NM_006840    | <i>LILRB5</i>    | 0.327124034529759 | 0                 | 2.00E-04 | 1      | 0.0014 | 0        | NA | NA |
| NM_001081442 | <i>LILRB5</i>    | 0.327124034529759 | 0                 | 2.00E-04 | 1      | 0.0014 | 0        | NA | NA |
| NM_171829    | <i>KCNMB3</i>    | 0.327124034529759 | 0                 | 2.00E-04 | 1      | 0.0014 | 0        | NA | NA |
| NR_028135    | <i>KCNMB3</i>    | 0.327124034529759 | 0                 | 2.00E-04 | 1      | 0.0014 | 0        | NA | NA |
| NR_036149    | <i>MIR3184</i>   | 0.326669695592912 | 0                 | 2.00E-04 | 1      | 0.0014 | 0        | NA | NA |
| NM_000661    | <i>RPL9</i>      | 0.326669695592912 | 0                 | 2.00E-04 | 1      | 0.0014 | 0        | NA | NA |
| NM_001085401 | <i>C6orf201</i>  | 0.326215356656065 | 0                 | 2.00E-04 | 1      | 0.0014 | 0        | NA | NA |
| NM_001284330 | <i>POLM</i>      | 0.325761017719219 | 0                 | 2.00E-04 | 1      | 0.0014 | 0        | NA | NA |
| NM_001284331 | <i>POLM</i>      | 0.325761017719219 | 0                 | 2.00E-04 | 1      | 0.0014 | 0        | NA | NA |
| NM_013284    | <i>POLM</i>      | 0.325761017719219 | 0                 | 2.00E-04 | 1      | 0.0014 | 0        | NA | NA |
| NR_104299    | <i>POLM</i>      | 0.325761017719219 | 0                 | 2.00E-04 | 1      | 0.0014 | 0        | NA | NA |
| NM_005313    | <i>PDIA3</i>     | 0.325306678782372 | 0                 | 2.00E-04 | 1      | 0.0014 | 0        | NA | NA |
| NR_002971    | <i>SNORA38</i>   | 0.325306678782372 | 0                 | 2.00E-04 | 1      | 0.0014 | 0        | NA | NA |
| NR_036178    | <i>MIR4296</i>   | 0.325306678782372 | 0                 | 2.00E-04 | 1      | 0.0014 | 0        | NA | NA |
| NM_152723    | <i>CCDC89</i>    | 0.325306678782372 | 0                 | 2.00E-04 | 1      | 0.0014 | 0        | NA | NA |
| NM_001198621 | <i>XIRP1</i>     | 0.325306678782372 | 0                 | 2.00E-04 | 1      | 0.0014 | 0        | NA | NA |
| NM_194293    | <i>XIRP1</i>     | 0.325306678782372 | 0                 | 6.00E-04 | 1      | 0.0043 | 1.00E-04 | NA | NA |
| NR_002763    | <i>CPS1-IT1</i>  | 0.324852339845525 | 0                 | 2.00E-04 | 1      | 0.0014 | 0        | NA | NA |
| NM_198486    | <i>RPL7L1</i>    | 0.324852339845525 | 0                 | 2.00E-04 | 1      | 0.0014 | 0        | NA | NA |
| NM_014080    | <i>DUOX2</i>     | 0.324852339845525 | 0                 | 2.00E-04 | 1      | 0.0014 | 0        | NA | NA |



|              |              |                   |                    |          |        |        |          |    |        |
|--------------|--------------|-------------------|--------------------|----------|--------|--------|----------|----|--------|
| NM_080282    | ABCA10       | 0.324852339845525 | 0                  | 2.00E-04 | 1      | 0.0014 | 0        | NA | NA     |
| NM_000869    | HTR3A        | 0.324398000908678 | 0                  | 2.00E-04 | 1      | 0.0014 | 0        | NA | NA     |
| NR_046363    | HTR3A        | 0.324398000908678 | 0                  | 2.00E-04 | 1      | 0.0014 | 0        | NA | NA     |
| NM_213621    | HTR3A        | 0.324398000908678 | 0                  | 2.00E-04 | 1      | 0.0014 | 0        | NA | NA     |
| NM_001258030 | GSN          | 0.324398000908678 | 0                  | 2.00E-04 | 1      | 0.0014 | 0        | NA | NA     |
| NM_007156    | ZXDA         | 0.324398000908678 | 0                  | 0.0072   | 0.9936 | 0.0741 | 0.0015   | NA | NA     |
| NM_001204478 | TVP23C-CDRT4 | 0.512039981826443 | 0.188096319854612  | 2.00E-04 | 1      | 0.0014 | 0        | NA | NA     |
| NR_037924    | TVP23C-CDRT4 | 0.512039981826443 | 0.188096319854612  | 2.00E-04 | 1      | 0.0014 | 0        | NA | NA     |
| NM_001135036 | TVP23C       | 0.512039981826443 | 0.188096319854612  | 2.00E-04 | 1      | 0.0014 | 0        | NA | NA     |
| NM_145301    | TVP23C       | 0.512039981826443 | 0.188096319854612  | 2.00E-04 | 1      | 0.0014 | 0        | NA | NA     |
| NM_182703    | ANKDD1A      | 0.323489323034984 | 0                  | 2.00E-04 | 1      | 0.0014 | 0        | NA | NA     |
| NM_031303    | KATNAL2      | 0.323489323034984 | 0                  | 2.00E-04 | 1      | 0.0014 | 0        | NA | NA     |
| NM_001018116 | MURC         | 0.549750113584734 | 0.22626079054975   | 2.00E-04 | 1      | 0.0014 | 0        | 1  | 0.1223 |
| NM_152430    | OR51E1       | 0.323034984098137 | 0                  | 2.00E-04 | 1      | 0.0014 | 0        | NA | NA     |
| NM_001143959 | C2orf74      | 0.323034984098137 | 0                  | 2.00E-04 | 1      | 0.0014 | 0        | NA | NA     |
| NM_018952    | HOXB6        | 0.323034984098137 | 0                  | 4.00E-04 | 0.9998 | 0.0038 | 1.00E-04 | NA | NA     |
| NM_001130033 | PLEKHB1      | 0.322126306224443 | 0                  | 2.00E-04 | 1      | 0.0014 | 0        | NA | NA     |
| NM_021200    | PLEKHB1      | 0.322126306224443 | 0                  | 2.00E-04 | 1      | 0.0014 | 0        | NA | NA     |
| NR_002574    | SNORD102     | 0.322126306224443 | 0                  | 6.00E-04 | 1      | 0.0043 | 1.00E-04 | NA | NA     |
| NM_001265595 | PFDN6        | 0.322126306224443 | 0                  | 2.00E-04 | 1      | 0.0014 | 0        | NA | NA     |
| NM_014260    | PFDN6        | 0.322126306224443 | 0                  | 2.00E-04 | 1      | 0.0014 | 0        | NA | NA     |
| NM_001185181 | PFDN6        | 0.322126306224443 | 0                  | 2.00E-04 | 1      | 0.0014 | 0        | NA | NA     |
| NM_001265596 | PFDN6        | 0.322126306224443 | 0                  | 2.00E-04 | 1      | 0.0014 | 0        | NA | NA     |
| NM_014437    | SLC39A1      | 0.322126306224443 | 0                  | 2.00E-04 | 1      | 0.0014 | 0        | NA | NA     |
| NM_001271960 | SLC39A1      | 0.322126306224443 | 0                  | 2.00E-04 | 1      | 0.0014 | 0        | NA | NA     |
| NM_182562    | FAM169B      | 0.322126306224443 | 0                  | 2.00E-04 | 1      | 0.0014 | 0        | NA | NA     |
| NM_015584    | POLDIP2      | 0.322126306224443 | 0                  | 2.00E-04 | 1      | 0.0014 | 0        | NA | NA     |
| NM_001135670 | MSRA         | 0.321671967287597 | 0                  | 2.00E-04 | 1      | 0.0014 | 0        | NA | NA     |
| NM_012331    | MSRA         | 0.321671967287597 | 0                  | 2.00E-04 | 1      | 0.0014 | 0        | NA | NA     |
| NM_001134888 | RTL1         | 0.321671967287597 | 0                  | 2.00E-04 | 1      | 0.0014 | 0        | NA | NA     |
| NM_173553    | TRIML2       | 0.321671967287597 | 0                  | 2.00E-04 | 1      | 0.0014 | 0        | NA | NA     |
| NM_001122824 | TACC1        | 0.344843253066788 | 0.0236256247160382 | 2.00E-04 | 1      | 0.0014 | 0        | NA | NA     |
| NM_006283    | TACC1        | 0.344843253066788 | 0.0236256247160382 | 2.00E-04 | 1      | 0.0014 | 0        | NA | NA     |
| NM_024686    | TTL7         | 0.320763289413903 | 0                  | 2.00E-04 | 1      | 0.0014 | 0        | NA | NA     |
| NM_030770    | TMPRSS5      | 0.320763289413903 | 0                  | 2.00E-04 | 1      | 0.0014 | 0        | NA | NA     |
| NM_000512    | GALNS        | 0.320763289413903 | 0                  | 2.00E-04 | 1      | 0.0014 | 0        | NA | NA     |
| NM_005963    | MYH1         | 0.450249886415266 | 0.129486597001363  | 4.00E-04 | 1      | 0.0038 | 1.00E-04 | NA | NA     |
| NM_001145113 | MYADML2      | 0.320763289413903 | 0                  | 2.00E-04 | 1      | 0.0014 | 0        | NA | NA     |
| NM_000737    | CGB          | 0.320763289413903 | 0                  | 2.00E-04 | 1      | 0.0014 | 0        | NA | NA     |
| NM_014406    | CCT8L2       | 0.320763289413903 | 0                  | 2.00E-04 | 1      | 0.0014 | 0        | NA | NA     |
| NM_033071    | SYNE1        | 0.320763289413903 | 0                  | 2.00E-04 | 1      | 0.0014 | 0        | NA | NA     |
| NM_182961    | SYNE1        | 0.320763289413903 | 0                  | 2.00E-04 | 1      | 0.0014 | 0        | NA | NA     |
| NM_001680    | FXYD2        | 0.320308950477056 | 0                  | 2.00E-04 | 1      | 0.0014 | 0        | NA | NA     |
| NR_039676    | MIR4466      | 0.320308950477056 | 0                  | 2.00E-04 | 1      | 0.0014 | 0        | NA | NA     |

|              |                  |                   |                    |          |        |        |          |    |    |
|--------------|------------------|-------------------|--------------------|----------|--------|--------|----------|----|----|
| NM_033083    | <i>EAF1</i>      | 0.37074057246706  | 0.0504316219900045 | 2.00E-04 | 1      | 0.0014 | 0        | NA | NA |
| NM_001163646 | <i>HTR3D</i>     | 0.332576101771922 | 0.0127214902317129 | 2.00E-04 | 1      | 0.0014 | 0        | NA | NA |
| NM_183378    | <i>OVCH1</i>     | 0.319854611540209 | 0                  | 2.00E-04 | 1      | 0.0014 | 0        | NA | NA |
| NM_001173455 | <i>PDHA1</i>     | 0.319400272603362 | 0                  | 2.00E-04 | 1      | 0.0014 | 0        | NA | NA |
| NM_000284    | <i>PDHA1</i>     | 0.319400272603362 | 0                  | 2.00E-04 | 1      | 0.0014 | 0        | NA | NA |
| NM_001173456 | <i>PDHA1</i>     | 0.319400272603362 | 0                  | 2.00E-04 | 1      | 0.0014 | 0        | NA | NA |
| NM_001173454 | <i>PDHA1</i>     | 0.319400272603362 | 0                  | 2.00E-04 | 1      | 0.0014 | 0        | NA | NA |
| NM_001252608 | <i>THBS3</i>     | 0.319400272603362 | 0                  | 2.00E-04 | 1      | 0.0014 | 0        | NA | NA |
| NM_007112    | <i>THBS3</i>     | 0.319400272603362 | 0                  | 2.00E-04 | 1      | 0.0014 | 0        | NA | NA |
| NM_001252607 | <i>THBS3</i>     | 0.319400272603362 | 0                  | 2.00E-04 | 1      | 0.0014 | 0        | NA | NA |
| NR_045553    | <i>THBS3</i>     | 0.319400272603362 | 0                  | 2.00E-04 | 1      | 0.0014 | 0        | NA | NA |
| NM_018833    | <i>TAP2</i>      | 0.337119491140391 | 0.0181735574738755 | 2.00E-04 | 1      | 0.0014 | 0        | NA | NA |
| NM_000544    | <i>TAP2</i>      | 0.337119491140391 | 0.0181735574738755 | 2.00E-04 | 1      | 0.0014 | 0        | NA | NA |
| NR_033169    | <i>GALNTL5</i>   | 0.318491594729668 | 0                  | 2.00E-04 | 1      | 0.0014 | 0        | NA | NA |
| NM_145292    | <i>GALNTL5</i>   | 0.318491594729668 | 0                  | 2.00E-04 | 1      | 0.0014 | 0        | NA | NA |
| NM_178007    | <i>STAR13</i>    | 0.318491594729668 | 0                  | 8.00E-04 | 0.9998 | 0.0046 | 2.00E-04 | NA | NA |
| NM_001243466 | <i>STAR13</i>    | 0.318491594729668 | 0                  | 4.00E-04 | 1      | 0.0038 | 1.00E-04 | NA | NA |
| NM_032857    | <i>LACTB</i>     | 0.318037255792821 | 0                  | 2.00E-04 | 1      | 0.0014 | 0        | NA | NA |
| NM_171846    | <i>LACTB</i>     | 0.318037255792821 | 0                  | 2.00E-04 | 1      | 0.0014 | 0        | NA | NA |
| NM_003101    | <i>SOAT1</i>     | 0.317582916855975 | 0                  | 2.00E-04 | 1      | 0.0014 | 0        | NA | NA |
| NM_001252512 | <i>SOAT1</i>     | 0.317582916855975 | 0                  | 2.00E-04 | 1      | 0.0014 | 0        | NA | NA |
| NM_001252511 | <i>SOAT1</i>     | 0.317582916855975 | 0                  | 2.00E-04 | 1      | 0.0014 | 0        | NA | NA |
| NR_045530    | <i>SOAT1</i>     | 0.317582916855975 | 0                  | 2.00E-04 | 1      | 0.0014 | 0        | NA | NA |
| NR_033298    | <i>CCDC163P</i>  | 0.317582916855975 | 0                  | 2.00E-04 | 1      | 0.0014 | 0        | NA | NA |
| NR_033297    | <i>CCDC163P</i>  | 0.317582916855975 | 0                  | 2.00E-04 | 1      | 0.0014 | 0        | NA | NA |
| NR_033296    | <i>CCDC163P</i>  | 0.317582916855975 | 0                  | 2.00E-04 | 1      | 0.0014 | 0        | NA | NA |
| NM_001100170 | <i>IMMT</i>      | 0.317128577919128 | 0                  | 2.00E-04 | 1      | 0.0014 | 0        | NA | NA |
| NM_006839    | <i>IMMT</i>      | 0.317128577919128 | 0                  | 2.00E-04 | 1      | 0.0014 | 0        | NA | NA |
| NM_001100169 | <i>IMMT</i>      | 0.317128577919128 | 0                  | 2.00E-04 | 1      | 0.0014 | 0        | NA | NA |
| NM_001030019 | <i>SUN3</i>      | 0.317128577919128 | 0                  | 2.00E-04 | 1      | 0.0014 | 0        | NA | NA |
| NM_152782    | <i>SUN3</i>      | 0.317128577919128 | 0                  | 2.00E-04 | 1      | 0.0014 | 0        | NA | NA |
| NM_001284350 | <i>SUN3</i>      | 0.317128577919128 | 0                  | 2.00E-04 | 1      | 0.0014 | 0        | NA | NA |
| NM_022368    | <i>PJA1</i>      | 0.316674238982281 | 0                  | 2.00E-04 | 1      | 0.0014 | 0        | NA | NA |
| NM_001032396 | <i>PJA1</i>      | 0.316674238982281 | 0                  | 2.00E-04 | 1      | 0.0014 | 0        | NA | NA |
| NM_145119    | <i>PJA1</i>      | 0.316674238982281 | 0                  | 2.00E-04 | 1      | 0.0014 | 0        | NA | NA |
| NM_001252120 | <i>PASK</i>      | 0.34166288050886  | 0.0254429804634257 | 2.00E-04 | 1      | 0.0014 | 0        | NA | NA |
| NM_152464    | <i>TMEM199</i>   | 0.316219900045434 | 0                  | 2.00E-04 | 1      | 0.0014 | 0        | NA | NA |
| NR_026663    | <i>GLIS3-AS1</i> | 0.316219900045434 | 0                  | 2.00E-04 | 1      | 0.0014 | 0        | NA | NA |
| NM_033188    | <i>KRTAP4-5</i>  | 0.316219900045434 | 0                  | 2.00E-04 | 1      | 0.0014 | 0        | NA | NA |
| NM_032180    | <i>FAM161A</i>   | 0.316219900045434 | 0                  | 2.00E-04 | 1      | 0.0014 | 0        | NA | NA |
| NR_037710    | <i>FAM161A</i>   | 0.316219900045434 | 0                  | 2.00E-04 | 1      | 0.0014 | 0        | NA | NA |
| NM_001201543 | <i>FAM161A</i>   | 0.316219900045434 | 0                  | 2.00E-04 | 1      | 0.0014 | 0        | NA | NA |
| NM_152677    | <i>ZSCAN4</i>    | 0.315765561108587 | 0                  | 2.00E-04 | 1      | 0.0014 | 0        | NA | NA |
| NM_014236    | <i>GNPAT</i>     | 0.31531122217174  | 0                  | 2.00E-04 | 1      | 0.0014 | 0        | NA | NA |

|              |              |                   |                    |          |        |        |          |    |        |
|--------------|--------------|-------------------|--------------------|----------|--------|--------|----------|----|--------|
| NM_001145112 | PATL2        | 0.31531122217174  | 0                  | 2.00E-04 | 1      | 0.0014 | 0        | NA | NA     |
| NM_001244638 | ARID5B       | 0.314856883234893 | 0                  | 2.00E-04 | 1      | 0.0014 | 0        | NA | NA     |
| NR_026812    | RUNX1-IT1    | 0.314856883234893 | 0                  | 0.0032   | 0.9968 | 0.0173 | 7.00E-04 | NA | NA     |
| NM_000699    | AMY2A        | 0.314402544298046 | 0                  | 2.00E-04 | 1      | 0.0014 | 0        | NA | NA     |
| NM_000056    | BCKDHB       | 0.314402544298046 | 0                  | 2.00E-04 | 1      | 0.0014 | 0        | NA | NA     |
| NM_183050    | BCKDHB       | 0.314402544298046 | 0                  | 2.00E-04 | 1      | 0.0014 | 0        | NA | NA     |
| NM_012130    | CLDN14       | 0.314402544298046 | 0                  | 2.00E-04 | 1      | 0.0014 | 0        | NA | NA     |
| NM_001098802 | CEP78        | 0.313948205361199 | 0                  | 2.00E-04 | 1      | 0.0014 | 0        | NA | NA     |
| NM_032171    | CEP78        | 0.313948205361199 | 0                  | 2.00E-04 | 1      | 0.0014 | 0        | NA | NA     |
| NM_001271664 | LOC440243    | 0.313948205361199 | 0                  | 2.00E-04 | 1      | 0.0014 | 0        | NA | NA     |
| NM_203458    | NOTCH2NL     | 0.313493866424353 | 0                  | 2.00E-04 | 1      | 0.0014 | 0        | NA | NA     |
| NM_004838    | HOMER3       | 0.313493866424353 | 0                  | 2.00E-04 | 1      | 0.0014 | 0        | NA | NA     |
| NM_013247    | HTRA2        | 0.3430258973194   | 0.0295320308950477 | 4.00E-04 | 1      | 0.0038 | 1.00E-04 | NA | NA     |
| NM_145074    | HTRA2        | 0.3430258973194   | 0.0295320308950477 | 2.00E-04 | 0.9998 | 0.0014 | 0        | NA | NA     |
| NM_203459    | CAMSAP2      | 0.313039527487506 | 0                  | 2.00E-04 | 1      | 0.0014 | 0        | NA | NA     |
| NM_001199868 | GLRX3        | 0.313039527487506 | 0                  | 2.00E-04 | 1      | 0.0014 | 0        | NA | NA     |
| NM_006541    | GLRX3        | 0.313039527487506 | 0                  | 2.00E-04 | 1      | 0.0014 | 0        | NA | NA     |
| NM_014734    | KIAA0247     | 0.313039527487506 | 0                  | 2.00E-04 | 1      | 0.0014 | 0        | NA | NA     |
| NM_016329    | SFMBT1       | 0.313039527487506 | 0                  | 2.00E-04 | 1      | 0.0014 | 0        | NA | NA     |
| NM_175884    | CCDC71L      | 0.313039527487506 | 0                  | 2.00E-04 | 1      | 0.0014 | 0        | NA | NA     |
| NM_019120    | PCDHB8       | 0.312585188550659 | 0                  | 2.00E-04 | 1      | 0.0014 | 0        | NA | NA     |
| NM_014626    | TAAR2        | 0.312585188550659 | 0                  | 2.00E-04 | 1      | 0.0014 | 0        | NA | NA     |
| NM_174951    | FAM9A        | 0.312585188550659 | 0                  | 2.00E-04 | 1      | 0.0014 | 0        | NA | NA     |
| NM_001171186 | FAM9A        | 0.312585188550659 | 0                  | 2.00E-04 | 1      | 0.0014 | 0        | NA | NA     |
| NM_013280    | FLRT1        | 0.312130849613812 | 0                  | 2.00E-04 | 1      | 0.0014 | 0        | NA | NA     |
| NM_001201459 | ZNF513       | 0.312130849613812 | 0                  | 0.0022   | 0.9978 | 0.0173 | 5.00E-04 | NA | NA     |
| NM_144631    | ZNF513       | 0.312130849613812 | 0                  | 0.004    | 0.997  | 0.0346 | 8.00E-04 | NA | NA     |
| NM_001242575 | LOC100130451 | 0.312130849613812 | 0                  | 2.00E-04 | 1      | 0.0014 | 0        | NA | NA     |
| NM_017578    | ROPN1        | 0.312130849613812 | 0                  | 2.00E-04 | 1      | 0.0014 | 0        | NA | NA     |
| NM_001004137 | OR52M1       | 0.311676510676965 | 0                  | 2.00E-04 | 1      | 0.0014 | 0        | NA | NA     |
| NM_022002    | NR1I2        | 0.311676510676965 | 0                  | 2.00E-04 | 1      | 0.0014 | 0        | NA | NA     |
| NM_001622    | AHSG         | 0.311676510676965 | 0                  | 2.00E-04 | 1      | 0.0014 | 0        | NA | NA     |
| NM_022304    | HRH2         | 0.311676510676965 | 0                  | 2.00E-04 | 1      | 0.0014 | 0        | NA | NA     |
| NM_033396    | TNKS1BP1     | 0.311676510676965 | 0                  | 2.00E-04 | 1      | 0.0014 | 0        | NA | NA     |
| NM_002146    | HOXB3        | 0.311676510676965 | 0                  | 2.00E-04 | 1      | 0.0014 | 0        | NA | NA     |
| NM_012114    | CASP14       | 0.311222171740118 | 0                  | 2.00E-04 | 1      | 0.0014 | 0        | NA | NA     |
| NM_001004738 | OR5L1        | 0.310767832803271 | 0                  | 4.00E-04 | 1      | 0.0038 | 1.00E-04 | NA | NA     |
| NM_052939    | FCRL3        | 0.310767832803271 | 0                  | 2.00E-04 | 1      | 0.0014 | 0        | NA | NA     |
| NM_002981    | CCL1         | 0.310767832803271 | 0                  | 2.00E-04 | 1      | 0.0014 | 0        | NA | NA     |
| NR_026742    | USP27X-AS1   | 0.310767832803271 | 0                  | 2.00E-04 | 1      | 0.0014 | 0        | NA | NA     |
| NM_005861    | STUB1        | 0.362562471603816 | 0.0522489777373921 | 2.00E-04 | 1      | 0.0014 | 0        | NA | NA     |
| NM_005260    | GDF9         | 0.515220354384371 | 0.205361199454793  | 2.00E-04 | 1      | 0.0014 | 0        | 1  | 0.1223 |
| NM_001184958 | C3orf20      | 0.309859154929577 | 0                  | 2.00E-04 | 1      | 0.0014 | 0        | NA | NA     |
| NM_001184957 | C3orf20      | 0.309859154929577 | 0                  | 2.00E-04 | 1      | 0.0014 | 0        | NA | NA     |

|              |                  |                   |                    |          |        |        |          |    |    |
|--------------|------------------|-------------------|--------------------|----------|--------|--------|----------|----|----|
| NM_032137    | <i>C3orf20</i>   | 0.309859154929577 | 0                  | 2.00E-04 | 1      | 0.0014 | 0        | NA | NA |
| NM_001098209 | <i>CTNNB1</i>    | 0.309859154929577 | 0                  | 2.00E-04 | 1      | 0.0014 | 0        | NA | NA |
| NM_001098210 | <i>CTNNB1</i>    | 0.309859154929577 | 0                  | 2.00E-04 | 1      | 0.0014 | 0        | NA | NA |
| NM_001904    | <i>CTNNB1</i>    | 0.309859154929577 | 0                  | 2.00E-04 | 1      | 0.0014 | 0        | NA | NA |
| NM_014728    | <i>FRMPD4</i>    | 0.309859154929577 | 0                  | 2.00E-04 | 1      | 0.0014 | 0        | NA | NA |
| NM_001003712 | <i>OSBPL8</i>    | 0.309404815992731 | 0                  | 2.00E-04 | 1      | 0.0014 | 0        | NA | NA |
| NM_020841    | <i>OSBPL8</i>    | 0.309404815992731 | 0                  | 2.00E-04 | 1      | 0.0014 | 0        | NA | NA |
| NM_201631    | <i>TGM5</i>      | 0.309404815992731 | 0                  | 0.001    | 0.9996 | 0.0104 | 2.00E-04 | NA | NA |
| NM_004245    | <i>TGM5</i>      | 0.309404815992731 | 0                  | 0.0016   | 0.9994 | 0.0115 | 3.00E-04 | NA | NA |
| NM_194249    | <i>DND1</i>      | 0.309404815992731 | 0                  | 2.00E-04 | 1      | 0.0014 | 0        | NA | NA |
| NM_000956    | <i>PTGER2</i>    | 0.308950477055884 | 0                  | 2.00E-04 | 1      | 0.0014 | 0        | NA | NA |
| NM_001135691 | <i>SLC18A1</i>   | 0.367105860972285 | 0.0581553839164016 | 2.00E-04 | 1      | 0.0014 | 0        | NA | NA |
| NM_001142325 | <i>SLC18A1</i>   | 0.367105860972285 | 0.0581553839164016 | 2.00E-04 | 1      | 0.0014 | 0        | NA | NA |
| NM_001142324 | <i>SLC18A1</i>   | 0.367105860972285 | 0.0581553839164016 | 2.00E-04 | 1      | 0.0014 | 0        | NA | NA |
| NM_003053    | <i>SLC18A1</i>   | 0.367105860972285 | 0.0581553839164016 | 2.00E-04 | 1      | 0.0014 | 0        | NA | NA |
| NM_018696    | <i>ELAC1</i>     | 0.308496138119037 | 0                  | 2.00E-04 | 1      | 0.0014 | 0        | NA | NA |
| NM_000992    | <i>RPL29</i>     | 0.308496138119037 | 0                  | 2.00E-04 | 1      | 0.0014 | 0        | NA | NA |
| NM_032279    | <i>ATP13A4</i>   | 0.308496138119037 | 0                  | 2.00E-04 | 1      | 0.0014 | 0        | NA | NA |
| NM_001037172 | <i>ACPL2</i>     | 0.362562471603816 | 0.0540663334847796 | 2.00E-04 | 1      | 0.0014 | 0        | NA | NA |
| NM_001282728 | <i>ACPL2</i>     | 0.362562471603816 | 0.0540663334847796 | 2.00E-04 | 1      | 0.0014 | 0        | NA | NA |
| NM_152282    | <i>ACPL2</i>     | 0.362562471603816 | 0.0540663334847796 | 2.00E-04 | 1      | 0.0014 | 0        | NA | NA |
| NM_002935    | <i>RNASE3</i>    | 0.30804179918219  | 0                  | 2.00E-04 | 1      | 0.0014 | 0        | NA | NA |
| NM_004162    | <i>RAB5A</i>     | 0.435256701499318 | 0.127214902317129  | 2.00E-04 | 1      | 0.0014 | 0        | NA | NA |
| NM_001005327 | <i>OR6K3</i>     | 0.307587460245343 | 0                  | 2.00E-04 | 1      | 0.0014 | 0        | NA | NA |
| NM_014342    | <i>MTCH2</i>     | 0.307587460245343 | 0                  | 2.00E-04 | 1      | 0.0014 | 0        | NA | NA |
| NM_002427    | <i>MMP13</i>     | 0.307587460245343 | 0                  | 2.00E-04 | 1      | 0.0014 | 0        | NA | NA |
| NM_152375    | <i>KLHDC7A</i>   | 0.307133121308496 | 0                  | 4.00E-04 | 1      | 0.0038 | 1.00E-04 | NA | NA |
| NM_018412    | <i>ST7</i>       | 0.306678782371649 | 0                  | 2.00E-04 | 1      | 0.0014 | 0        | NA | NA |
| NM_021908    | <i>ST7</i>       | 0.306678782371649 | 0                  | 2.00E-04 | 1      | 0.0014 | 0        | NA | NA |
| NR_002329    | <i>ST7-OT4</i>   | 0.306678782371649 | 0                  | 2.00E-04 | 1      | 0.0014 | 0        | NA | NA |
| NM_001135652 | <i>EIF2AK2</i>   | 0.305770104497955 | 0                  | 2.00E-04 | 1      | 0.0014 | 0        | NA | NA |
| NM_001004759 | <i>OR51T1</i>    | 0.429350295320309 | 0.1240345297592    | 2.00E-04 | 1      | 0.0014 | 0        | NA | NA |
| NM_021182    | <i>HMHB1</i>     | 0.305315765561109 | 0                  | 2.00E-04 | 1      | 0.0014 | 0        | NA | NA |
| NM_001001821 | <i>OR2T34</i>    | 0.305315765561109 | 0                  | 2.00E-04 | 1      | 0.0014 | 0        | NA | NA |
| NM_001012398 | <i>AKTIP</i>     | 0.37664697864607  | 0.0717855520218083 | 2.00E-04 | 1      | 0.0014 | 0        | NA | NA |
| NM_022476    | <i>AKTIP</i>     | 0.37664697864607  | 0.0717855520218083 | 2.00E-04 | 1      | 0.0014 | 0        | NA | NA |
| NM_001206626 | <i>TRIM49B</i>   | 0.304407087687415 | 0                  | 2.00E-04 | 1      | 0.0014 | 0        | NA | NA |
| NM_001105522 | <i>TRIM49D2P</i> | 0.304407087687415 | 0                  | 2.00E-04 | 1      | 0.0014 | 0        | NA | NA |
| NR_026809    | <i>FAM106A</i>   | 0.419809177646524 | 0.115402089959109  | 2.00E-04 | 1      | 0.0014 | 0        | NA | NA |
| NM_005636    | <i>SSX4</i>      | 0.304407087687415 | 0                  | 2.00E-04 | 1      | 0.0014 | 0        | NA | NA |
| NM_138731    | <i>MIPOL1</i>    | 0.303952748750568 | 0                  | 2.00E-04 | 1      | 0.0014 | 0        | NA | NA |
| NM_001195297 | <i>MIPOL1</i>    | 0.303952748750568 | 0                  | 2.00E-04 | 1      | 0.0014 | 0        | NA | NA |
| NM_001195296 | <i>MIPOL1</i>    | 0.303952748750568 | 0                  | 2.00E-04 | 1      | 0.0014 | 0        | NA | NA |
| NM_001040703 | <i>DEFB105B</i>  | 0.303952748750568 | 0                  | 2.00E-04 | 1      | 0.0014 | 0        | NA | NA |

|              |          |                   |                     |          |        |        |          |    |    |
|--------------|----------|-------------------|---------------------|----------|--------|--------|----------|----|----|
| NM_152250    | DEFB105A | 0.303952748750568 | 0                   | 2.00E-04 | 1      | 0.0014 | 0        | NA | NA |
| NM_201629    | TJP2     | 0.303952748750568 | 0                   | 2.00E-04 | 1      | 0.0014 | 0        | NA | NA |
| NM_001170630 | TJP2     | 0.303952748750568 | 0                   | 2.00E-04 | 1      | 0.0014 | 0        | NA | NA |
| NM_004817    | TJP2     | 0.303952748750568 | 0                   | 2.00E-04 | 1      | 0.0014 | 0        | NA | NA |
| NM_014805    | EPM2AIP1 | 0.303952748750568 | 0                   | 2.00E-04 | 1      | 0.0014 | 0        | NA | NA |
| NM_002284    | KRT86    | 0.326215356656065 | 0.0222626079054975  | 2.00E-04 | 1      | 0.0014 | 0        | NA | NA |
| NM_006556    | PMVK     | 0.303498409813721 | 0                   | 2.00E-04 | 1      | 0.0014 | 0        | NA | NA |
| NM_001123392 | TBC1D3H  | 0.303498409813721 | 0                   | 2.00E-04 | 1      | 0.0014 | 0        | NA | NA |
| NM_001098501 | KIAA1217 | 0.303044070876874 | 0                   | 2.00E-04 | 1      | 0.0014 | 0        | NA | NA |
| NM_001282767 | KIAA1217 | 0.303044070876874 | 0                   | 2.00E-04 | 1      | 0.0014 | 0        | NA | NA |
| NM_001282768 | KIAA1217 | 0.303044070876874 | 0                   | 2.00E-04 | 1      | 0.0014 | 0        | NA | NA |
| NM_019590    | KIAA1217 | 0.303044070876874 | 0                   | 2.00E-04 | 1      | 0.0014 | 0        | NA | NA |
| NM_016090    | RBM7     | 0.303044070876874 | 0                   | 2.00E-04 | 1      | 0.0014 | 0        | NA | NA |
| NM_004995    | MMP14    | 0.303044070876874 | 0                   | 2.00E-04 | 1      | 0.0014 | 0        | NA | NA |
| NM_006786    | UTS2     | 0.303044070876874 | 0                   | 2.00E-04 | 1      | 0.0014 | 0        | NA | NA |
| NM_015689    | DENND2A  | 0.303044070876874 | 0                   | 2.00E-04 | 1      | 0.0014 | 0        | NA | NA |
| NM_199354    | PRB1     | 0.443434802362562 | 0.140845070422535   | 2.00E-04 | 1      | 0.0014 | 0        | NA | NA |
| NM_199353    | PRB1     | 0.443434802362562 | 0.140845070422535   | 2.00E-04 | 1      | 0.0014 | 0        | NA | NA |
| NM_005039    | PRB1     | 0.443434802362562 | 0.140845070422535   | 6.00E-04 | 1      | 0.0043 | 1.00E-04 | NA | NA |
| NM_000299    | PKP1     | 0.302589731940027 | 0                   | 2.00E-04 | 1      | 0.0014 | 0        | NA | NA |
| NM_001005337 | PKP1     | 0.302589731940027 | 0                   | 2.00E-04 | 1      | 0.0014 | 0        | NA | NA |
| NM_001399    | EDA      | 0.302589731940027 | 0                   | 2.00E-04 | 1      | 0.0014 | 0        | NA | NA |
| NM_001005613 | EDA      | 0.302589731940027 | 0                   | 2.00E-04 | 1      | 0.0014 | 0        | NA | NA |
| NM_001005612 | EDA      | 0.302589731940027 | 0                   | 2.00E-04 | 1      | 0.0014 | 0        | NA | NA |
| NM_001005610 | EDA      | 0.302589731940027 | 0                   | 2.00E-04 | 1      | 0.0014 | 0        | NA | NA |
| NM_001005609 | EDA      | 0.302589731940027 | 0                   | 2.00E-04 | 1      | 0.0014 | 0        | NA | NA |
| NR_026723    | SARNP    | 0.302589731940027 | 0                   | 2.00E-04 | 1      | 0.0014 | 0        | NA | NA |
| NM_033082    | SARNP    | 0.302589731940027 | 0                   | 2.00E-04 | 1      | 0.0014 | 0        | NA | NA |
| NR_026722    | SARNP    | 0.302589731940027 | 0                   | 2.00E-04 | 1      | 0.0014 | 0        | NA | NA |
| NM_014899    | RHOBTB3  | 0.30213539300318  | 0                   | 2.00E-04 | 1      | 0.0014 | 0        | NA | NA |
| NM_000297    | PKD2     | 0.301681054066333 | 0                   | 2.00E-04 | 1      | 0.0014 | 0        | NA | NA |
| NM_006756    | TCEA1    | 0.301681054066333 | 0                   | 2.00E-04 | 1      | 0.0014 | 0        | NA | NA |
| NM_201437    | TCEA1    | 0.301681054066333 | 0                   | 2.00E-04 | 1      | 0.0014 | 0        | NA | NA |
| NM_005650    | TCF20    | 0.301226715129487 | 0                   | 2.00E-04 | 1      | 0.0014 | 0        | NA | NA |
| NM_181492    | TCF20    | 0.301226715129487 | 0                   | 2.00E-04 | 1      | 0.0014 | 0        | NA | NA |
| NM_007267    | TMC6     | 0.30804179918219  | 0.00681508405270332 | 2.00E-04 | 1      | 0.0014 | 0        | NA | NA |
| NM_001282695 | FAM107B  | 0.492957746478873 | 0.191731031349387   | 2.00E-04 | 1      | 0.0014 | 0        | NA | NA |
| NM_031453    | FAM107B  | 0.492957746478873 | 0.191731031349387   | 2.00E-04 | 1      | 0.0014 | 0        | NA | NA |
| NM_001270500 | CA6      | 0.30077237619264  | 0                   | 0.0022   | 0.9968 | 0.0173 | 5.00E-04 | NA | NA |
| NM_001270502 | CA6      | 0.30077237619264  | 0                   | 0.0016   | 0.9984 | 0.0115 | 3.00E-04 | NA | NA |
| NM_001215    | CA6      | 0.30077237619264  | 0                   | 0.002    | 0.9974 | 0.0126 | 4.00E-04 | NA | NA |
| NM_001270501 | CA6      | 0.30077237619264  | 0                   | 0.0016   | 0.9986 | 0.0115 | 3.00E-04 | NA | NA |
| NM_001160004 | NRG1     | 0.30077237619264  | 0                   | 2.00E-04 | 1      | 0.0014 | 0        | NA | NA |
| NM_001160002 | NRG1     | 0.30077237619264  | 0                   | 2.00E-04 | 1      | 0.0014 | 0        | NA | NA |

|              |           |                   |                   |          |          |        |    |        |          |
|--------------|-----------|-------------------|-------------------|----------|----------|--------|----|--------|----------|
| NM_001160008 | NRG1      | 0.30077237619264  | 0                 | 2.00E-04 | 1        | 0.0014 | 0  | NA     | NA       |
| NM_013956    | NRG1      | 0.30077237619264  | 0                 | 2.00E-04 | 1        | 0.0014 | 0  | NA     | NA       |
| NM_001160007 | NRG1      | 0.30077237619264  | 0                 | 2.00E-04 | 1        | 0.0014 | 0  | NA     | NA       |
| NM_001160005 | NRG1      | 0.30077237619264  | 0                 | 2.00E-04 | 1        | 0.0014 | 0  | NA     | NA       |
| NM_013964    | NRG1      | 0.30077237619264  | 0                 | 2.00E-04 | 1        | 0.0014 | 0  | NA     | NA       |
| NM_004495    | NRG1      | 0.30077237619264  | 0                 | 2.00E-04 | 1        | 0.0014 | 0  | NA     | NA       |
| NM_013960    | NRG1      | 0.30077237619264  | 0                 | 2.00E-04 | 1        | 0.0014 | 0  | NA     | NA       |
| NM_013958    | NRG1      | 0.30077237619264  | 0                 | 2.00E-04 | 1        | 0.0014 | 0  | NA     | NA       |
| NM_013957    | NRG1      | 0.30077237619264  | 0                 | 2.00E-04 | 1        | 0.0014 | 0  | NA     | NA       |
| NM_002054    | GCG       | 0.30077237619264  | 0                 | 2.00E-04 | 1        | 0.0014 | 0  | NA     | NA       |
| NM_001025200 | CTRB2     | 0.300318037255793 | 0                 | 2.00E-04 | 1        | 0.0014 | 0  | NA     | NA       |
| NM_001010848 | NRG3      | 0                 | 0.300318037255793 | 1        | 2.00E-04 | NA     | NA | 0.0013 | 0        |
| NM_001165972 | NRG3      | 0                 | 0.300318037255793 | 1        | 2.00E-04 | NA     | NA | 0.0013 | 0        |
| NM_000346    | SOX9      | 0                 | 0.300318037255793 | 1        | 2.00E-04 | NA     | NA | 0.0013 | 0        |
| NM_017613    | DONSON    | 0                 | 0.300318037255793 | 1        | 2.00E-04 | NA     | NA | 0.0013 | 0        |
| NM_001178016 | SLC4A10   | 0.19263970922308  | 0.492957746478873 | 1        | 2.00E-04 | NA     | NA | 0.0013 | 0        |
| NM_022058    | SLC4A10   | 0.19263970922308  | 0.492957746478873 | 1        | 2.00E-04 | NA     | NA | 0.0013 | 0        |
| NM_001178015 | SLC4A10   | 0.19263970922308  | 0.492957746478873 | 1        | 2.00E-04 | NA     | NA | 0.0013 | 0        |
| NM_001004124 | OR4P4     | 0                 | 0.30077237619264  | 1        | 2.00E-04 | NA     | NA | 0.0013 | 0        |
| NM_138704    | NDNL2     | 0                 | 0.30077237619264  | 1        | 2.00E-04 | NA     | NA | 0.0013 | 0        |
| NM_198963    | DHX57     | 0                 | 0.30077237619264  | 1        | 2.00E-04 | NA     | NA | 0.0013 | 0        |
| NM_130768    | ASZ1      | 0                 | 0.30077237619264  | 1        | 2.00E-04 | NA     | NA | 0.0013 | 0        |
| NR_023315    | ASZ1      | 0                 | 0.30077237619264  | 1        | 2.00E-04 | NA     | NA | 0.0013 | 0        |
| NM_005956    | MTHFD1    | 0                 | 0.301226715129487 | 1        | 0.001    | NA     | NA | 0.0054 | 2.00E-04 |
| NM_016548    | GOLM1     | 0                 | 0.301226715129487 | 0.995    | 0.0054   | NA     | NA | 0.0251 | 8.00E-04 |
| NM_001136135 | RPL28     | 0                 | 0.301681054066333 | 1        | 2.00E-04 | NA     | NA | 0.0013 | 0        |
| NM_001136134 | RPL28     | 0                 | 0.301681054066333 | 1        | 2.00E-04 | NA     | NA | 0.0013 | 0        |
| NM_001136137 | RPL28     | 0                 | 0.301681054066333 | 1        | 2.00E-04 | NA     | NA | 0.0013 | 0        |
| NM_001136136 | RPL28     | 0                 | 0.301681054066333 | 1        | 2.00E-04 | NA     | NA | 0.0013 | 0        |
| NM_000991    | RPL28     | 0                 | 0.301681054066333 | 1        | 2.00E-04 | NA     | NA | 0.0013 | 0        |
| NM_018941    | CLN8      | 0                 | 0.301681054066333 | 1        | 2.00E-04 | NA     | NA | 0.0013 | 0        |
| NM_001134492 | HS2ST1    | 0                 | 0.30213539300318  | 0.993    | 0.0088   | NA     | NA | 0.0539 | 0.0013   |
| NM_012262    | HS2ST1    | 0                 | 0.30213539300318  | 0.9914   | 0.008    | NA     | NA | 0.0539 | 0.0012   |
| NM_001113226 | NTNG1     | 0                 | 0.30213539300318  | 1        | 2.00E-04 | NA     | NA | 0.0013 | 0        |
| NM_001113228 | NTNG1     | 0                 | 0.30213539300318  | 1        | 2.00E-04 | NA     | NA | 0.0013 | 0        |
| NM_014917    | NTNG1     | 0                 | 0.30213539300318  | 1        | 2.00E-04 | NA     | NA | 0.0013 | 0        |
| NR_040248    | ZEB2-AS1  | 0                 | 0.30213539300318  | 1        | 2.00E-04 | NA     | NA | 0.0013 | 0        |
| NM_006136    | CAPZA2    | 0                 | 0.30213539300318  | 1        | 2.00E-04 | NA     | NA | 0.0013 | 0        |
| NM_001190764 | TMEM238   | 0                 | 0.30213539300318  | 1        | 2.00E-04 | NA     | NA | 0.0013 | 0        |
| NR_046262    | LOC646719 | 0                 | 0.30213539300318  | 1        | 2.00E-04 | NA     | NA | 0.0013 | 0        |
| NM_032511    | FAXC      | 0                 | 0.30213539300318  | 1        | 2.00E-04 | NA     | NA | 0.0013 | 0        |
| NM_001135649 | FOXI3     | 0                 | 0.302589731940027 | 0.9886   | 0.0176   | NA     | NA | 0.1281 | 0.0025   |
| NM_004087    | DLG1      | 0                 | 0.302589731940027 | 1        | 2.00E-04 | NA     | NA | 0.0013 | 0        |
| NM_001204386 | DLG1      | 0                 | 0.302589731940027 | 1        | 2.00E-04 | NA     | NA | 0.0013 | 0        |

|              |                   |                   |                   |        |          |    |    |        |          |
|--------------|-------------------|-------------------|-------------------|--------|----------|----|----|--------|----------|
| NM_001098424 | <i>DLG1</i>       | 0                 | 0.302589731940027 | 1      | 2.00E-04 | NA | NA | 0.0013 | 0        |
| NM_001201484 | <i>PIGO</i>       | 0                 | 0.302589731940027 | 1      | 2.00E-04 | NA | NA | 0.0013 | 0        |
| NM_152850    | <i>PIGO</i>       | 0                 | 0.302589731940027 | 1      | 2.00E-04 | NA | NA | 0.0013 | 0        |
| NM_032634    | <i>PIGO</i>       | 0                 | 0.302589731940027 | 1      | 2.00E-04 | NA | NA | 0.0013 | 0        |
| NM_012397    | <i>SERPINB13</i>  | 0.149023171285779 | 0.451612903225806 | 1      | 2.00E-04 | NA | NA | 0.0013 | 0        |
| NR_037962    | <i>RHOU</i>       | 0                 | 0.303044070876874 | 1      | 2.00E-04 | NA | NA | 0.0013 | 0        |
| NR_002834    | <i>DUSP5P1</i>    | 0                 | 0.303044070876874 | 1      | 2.00E-04 | NA | NA | 0.0013 | 0        |
| NM_006789    | <i>APOBEC2</i>    | 0                 | 0.303044070876874 | 1      | 2.00E-04 | NA | NA | 0.0013 | 0        |
| NM_002304    | <i>LFNG</i>       | 0                 | 0.303044070876874 | 1      | 2.00E-04 | NA | NA | 0.0013 | 0        |
| NM_001171811 | <i>GBA</i>        | 0                 | 0.303044070876874 | 1      | 2.00E-04 | NA | NA | 0.0013 | 0        |
| NM_001005742 | <i>GBA</i>        | 0                 | 0.303044070876874 | 1      | 2.00E-04 | NA | NA | 0.0013 | 0        |
| NM_001005741 | <i>GBA</i>        | 0                 | 0.303044070876874 | 1      | 2.00E-04 | NA | NA | 0.0013 | 0        |
| NM_001256372 | <i>E2F8</i>       | 0                 | 0.303044070876874 | 1      | 2.00E-04 | NA | NA | 0.0013 | 0        |
| NM_001256371 | <i>E2F8</i>       | 0                 | 0.303044070876874 | 1      | 2.00E-04 | NA | NA | 0.0013 | 0        |
| NM_001242877 | <i>ELP2</i>       | 0                 | 0.303498409813721 | 1      | 2.00E-04 | NA | NA | 0.0013 | 0        |
| NM_001242876 | <i>ELP2</i>       | 0                 | 0.303498409813721 | 1      | 2.00E-04 | NA | NA | 0.0013 | 0        |
| NM_001242875 | <i>ELP2</i>       | 0                 | 0.303498409813721 | 1      | 2.00E-04 | NA | NA | 0.0013 | 0        |
| NM_001242879 | <i>ELP2</i>       | 0                 | 0.303498409813721 | 1      | 2.00E-04 | NA | NA | 0.0013 | 0        |
| NM_001242878 | <i>ELP2</i>       | 0                 | 0.303498409813721 | 1      | 2.00E-04 | NA | NA | 0.0013 | 0        |
| NR_040110    | <i>ELP2</i>       | 0                 | 0.303498409813721 | 1      | 2.00E-04 | NA | NA | 0.0013 | 0        |
| NM_018255    | <i>ELP2</i>       | 0                 | 0.303498409813721 | 1      | 2.00E-04 | NA | NA | 0.0013 | 0        |
| NM_018433    | <i>KDM3A</i>      | 0                 | 0.303498409813721 | 1      | 2.00E-04 | NA | NA | 0.0013 | 0        |
| NR_038879    | <i>PAXBP1-AS1</i> | 0                 | 0.303498409813721 | 1      | 2.00E-04 | NA | NA | 0.0013 | 0        |
| NR_038880    | <i>PAXBP1-AS1</i> | 0                 | 0.303498409813721 | 1      | 2.00E-04 | NA | NA | 0.0013 | 0        |
| NM_145715    | <i>TIGD2</i>      | 0                 | 0.303498409813721 | 1      | 2.00E-04 | NA | NA | 0.0013 | 0        |
| NM_032119    | <i>GPR98</i>      | 0                 | 0.303498409813721 | 1      | 2.00E-04 | NA | NA | 0.0013 | 0        |
| NR_003149    | <i>GPR98</i>      | 0                 | 0.303498409813721 | 1      | 2.00E-04 | NA | NA | 0.0013 | 0        |
| NM_019009    | <i>TOLLIP</i>     | 0                 | 0.303498409813721 | 1      | 2.00E-04 | NA | NA | 0.0013 | 0        |
| NM_001110221 | <i>GJB6</i>       | 0                 | 0.303498409813721 | 1      | 2.00E-04 | NA | NA | 0.0013 | 0        |
| NM_001110219 | <i>GJB6</i>       | 0                 | 0.303498409813721 | 1      | 2.00E-04 | NA | NA | 0.0013 | 0        |
| NM_001110220 | <i>GJB6</i>       | 0                 | 0.303498409813721 | 1      | 2.00E-04 | NA | NA | 0.0013 | 0        |
| NM_001012421 | <i>ANKRD20A2</i>  | 0                 | 0.303498409813721 | 1      | 0.002    | NA | NA | 0.0087 | 3.00E-04 |
| NR_046375    | <i>MRV1-AS1</i>   | 0                 | 0.303952748750568 | 1      | 2.00E-04 | NA | NA | 0.0013 | 0        |
| NR_046374    | <i>MRV1-AS1</i>   | 0                 | 0.303952748750568 | 1      | 2.00E-04 | NA | NA | 0.0013 | 0        |
| NR_034094    | <i>MRV1-AS1</i>   | 0                 | 0.303952748750568 | 1      | 2.00E-04 | NA | NA | 0.0013 | 0        |
| NR_034093    | <i>MRV1-AS1</i>   | 0                 | 0.303952748750568 | 1      | 2.00E-04 | NA | NA | 0.0013 | 0        |
| NM_005717    | <i>ARPC5</i>      | 0                 | 0.303952748750568 | 1      | 2.00E-04 | NA | NA | 0.0013 | 0        |
| NM_001270439 | <i>ARPC5</i>      | 0                 | 0.303952748750568 | 1      | 2.00E-04 | NA | NA | 0.0013 | 0        |
| NM_001100421 | <i>C21orf91</i>   | 0                 | 0.303952748750568 | 1      | 2.00E-04 | NA | NA | 0.0013 | 0        |
| NM_001100420 | <i>C21orf91</i>   | 0                 | 0.303952748750568 | 1      | 2.00E-04 | NA | NA | 0.0013 | 0        |
| NM_017447    | <i>C21orf91</i>   | 0                 | 0.303952748750568 | 1      | 2.00E-04 | NA | NA | 0.0013 | 0        |
| NM_032276    | <i>RHBDD1</i>     | 0                 | 0.304407087687415 | 0.9988 | 0.001    | NA | NA | 0.0054 | 2.00E-04 |
| NM_001167608 | <i>RHBDD1</i>     | 0                 | 0.304407087687415 | 0.9988 | 0.001    | NA | NA | 0.0054 | 2.00E-04 |
| NM_017644    | <i>KLHL24</i>     | 0                 | 0.304407087687415 | 1      | 0.0016   | NA | NA | 0.0087 | 2.00E-04 |

|              |           |                    |                   |        |          |    |    |        |          |
|--------------|-----------|--------------------|-------------------|--------|----------|----|----|--------|----------|
| NM_181514    | MRPL21    | 0                  | 0.304407087687415 | 1      | 2.00E-04 | NA | NA | 0.0013 | 0        |
| NM_181515    | MRPL21    | 0                  | 0.304407087687415 | 1      | 2.00E-04 | NA | NA | 0.0013 | 0        |
| NM_145305    | SLC25A43  | 0                  | 0.304861426624262 | 1      | 2.00E-04 | NA | NA | 0.0013 | 0        |
| NM_206824    | VKORC1    | 0                  | 0.304861426624262 | 1      | 2.00E-04 | NA | NA | 0.0013 | 0        |
| NM_024006    | VKORC1    | 0                  | 0.304861426624262 | 1      | 2.00E-04 | NA | NA | 0.0013 | 0        |
| NM_001082971 | DDC       | 0                  | 0.304861426624262 | 1      | 2.00E-04 | NA | NA | 0.0013 | 0        |
| NM_032270    | LRRC8C    | 0                  | 0.305315765561109 | 0.9996 | 2.00E-04 | NA | NA | 0.0013 | 0        |
| NM_021958    | HLX       | 0                  | 0.305315765561109 | 1      | 2.00E-04 | NA | NA | 0.0013 | 0        |
| NM_003024    | ITSN1     | 0                  | 0.305315765561109 | 1      | 2.00E-04 | NA | NA | 0.0013 | 0        |
| NM_001001132 | ITSN1     | 0                  | 0.305315765561109 | 1      | 2.00E-04 | NA | NA | 0.0013 | 0        |
| NM_020640    | DCUN1D1   | 0                  | 0.305315765561109 | 1      | 2.00E-04 | NA | NA | 0.0013 | 0        |
| NM_014727    | KMT2B     | 0                  | 0.305770104497955 | 1      | 2.00E-04 | NA | NA | 0.0013 | 0        |
| NM_181575    | AUP1      | 0                  | 0.305770104497955 | 1      | 2.00E-04 | NA | NA | 0.0013 | 0        |
| NM_145858    | CRYZL1    | 0                  | 0.305770104497955 | 1      | 2.00E-04 | NA | NA | 0.0013 | 0        |
| NM_001170803 | LARP4     | 0                  | 0.306678782371649 | 1      | 2.00E-04 | NA | NA | 0.0013 | 0        |
| NM_199190    | LARP4     | 0                  | 0.306678782371649 | 1      | 2.00E-04 | NA | NA | 0.0013 | 0        |
| NM_001170808 | LARP4     | 0                  | 0.306678782371649 | 1      | 2.00E-04 | NA | NA | 0.0013 | 0        |
| NM_199188    | LARP4     | 0                  | 0.306678782371649 | 1      | 2.00E-04 | NA | NA | 0.0013 | 0        |
| NM_052879    | LARP4     | 0                  | 0.306678782371649 | 1      | 2.00E-04 | NA | NA | 0.0013 | 0        |
| NR_033200    | LARP4     | 0                  | 0.306678782371649 | 1      | 2.00E-04 | NA | NA | 0.0013 | 0        |
| NM_001170804 | LARP4     | 0                  | 0.306678782371649 | 1      | 2.00E-04 | NA | NA | 0.0013 | 0        |
| NM_001004465 | OR10H4    | 0                  | 0.306678782371649 | 1      | 2.00E-04 | NA | NA | 0.0013 | 0        |
| NR_033798    | CAST      | 0                  | 0.306678782371649 | 1      | 2.00E-04 | NA | NA | 0.0013 | 0        |
| NR_104285    | CAST      | 0                  | 0.306678782371649 | 1      | 2.00E-04 | NA | NA | 0.0013 | 0        |
| NM_021951    | DMRT1     | 0                  | 0.306678782371649 | 0.9974 | 0.0038   | NA | NA | 0.0251 | 6.00E-04 |
| NM_001178142 | TFDP2     | 0                  | 0.306678782371649 | 1      | 2.00E-04 | NA | NA | 0.0013 | 0        |
| NM_001178141 | TFDP2     | 0                  | 0.306678782371649 | 1      | 2.00E-04 | NA | NA | 0.0013 | 0        |
| NM_006286    | TFDP2     | 0                  | 0.306678782371649 | 1      | 2.00E-04 | NA | NA | 0.0013 | 0        |
| NM_020686    | ABAT      | 0                  | 0.307133121308496 | 1      | 2.00E-04 | NA | NA | 0.0013 | 0        |
| NM_181482    | LDLRAD4   | 0                  | 0.307133121308496 | 1      | 2.00E-04 | NA | NA | 0.0013 | 0        |
| NM_014618    | BRINP1    | 0                  | 0.307133121308496 | 1      | 4.00E-04 | NA | NA | 0.0029 | 1.00E-04 |
| NM_014229    | SLC6A11   | 0                  | 0.307587460245343 | 1      | 2.00E-04 | NA | NA | 0.0013 | 0        |
| NM_006368    | CREB3     | 0                  | 0.307587460245343 | 1      | 2.00E-04 | NA | NA | 0.0013 | 0        |
| NM_001144769 | DST       | 0                  | 0.307587460245343 | 1      | 2.00E-04 | NA | NA | 0.0013 | 0        |
| NM_203405    | KRTAP26-1 | 0.0722398909586552 | 0.380281690140845 | 0.9936 | 0.0058   | NA | NA | 0.027  | 8.00E-04 |
| NR_024062    | UBE2DNL   | 0                  | 0.30804179918219  | 1      | 6.00E-04 | NA | NA | 0.0039 | 1.00E-04 |
| NM_144590    | ANKRD22   | 0                  | 0.30804179918219  | 1      | 2.00E-04 | NA | NA | 0.0013 | 0        |
| NM_001270945 | LOC643355 | 0                  | 0.308496138119037 | 1      | 2.00E-04 | NA | NA | 0.0013 | 0        |
| NM_014039    | C11orf54  | 0                  | 0.308496138119037 | 1      | 2.00E-04 | NA | NA | 0.0013 | 0        |
| NM_002949    | MRPL12    | 0                  | 0.308496138119037 | 1      | 2.00E-04 | NA | NA | 0.0013 | 0        |
| NM_013361    | ZNF223    | 0                  | 0.308496138119037 | 1      | 2.00E-04 | NA | NA | 0.0013 | 0        |
| NM_012279    | ZNF346    | 0                  | 0.308496138119037 | 1      | 2.00E-04 | NA | NA | 0.0013 | 0        |
| NM_025179    | PLXNA2    | 0                  | 0.308496138119037 | 1      | 2.00E-04 | NA | NA | 0.0013 | 0        |
| NM_001099669 | HIGD1A    | 0                  | 0.308496138119037 | 1      | 2.00E-04 | NA | NA | 0.0013 | 0        |



|              |         |   |                   |   |          |    |    |        |   |
|--------------|---------|---|-------------------|---|----------|----|----|--------|---|
| NM_014056    | HIGD1A  | 0 | 0.308496138119037 | 1 | 2.00E-04 | NA | NA | 0.0013 | 0 |
| NM_001129829 | CACNA1C | 0 | 0.308950477055884 | 1 | 2.00E-04 | NA | NA | 0.0013 | 0 |
| NM_001129840 | CACNA1C | 0 | 0.308950477055884 | 1 | 2.00E-04 | NA | NA | 0.0013 | 0 |
| NM_001129841 | CACNA1C | 0 | 0.308950477055884 | 1 | 2.00E-04 | NA | NA | 0.0013 | 0 |
| NM_001129831 | CACNA1C | 0 | 0.308950477055884 | 1 | 2.00E-04 | NA | NA | 0.0013 | 0 |
| NM_001129827 | CACNA1C | 0 | 0.308950477055884 | 1 | 2.00E-04 | NA | NA | 0.0013 | 0 |
| NM_000719    | CACNA1C | 0 | 0.308950477055884 | 1 | 2.00E-04 | NA | NA | 0.0013 | 0 |
| NM_001129832 | CACNA1C | 0 | 0.308950477055884 | 1 | 2.00E-04 | NA | NA | 0.0013 | 0 |
| NM_001129844 | CACNA1C | 0 | 0.308950477055884 | 1 | 2.00E-04 | NA | NA | 0.0013 | 0 |
| NM_001167625 | CACNA1C | 0 | 0.308950477055884 | 1 | 2.00E-04 | NA | NA | 0.0013 | 0 |
| NM_001129830 | CACNA1C | 0 | 0.308950477055884 | 1 | 2.00E-04 | NA | NA | 0.0013 | 0 |
| NM_001129843 | CACNA1C | 0 | 0.308950477055884 | 1 | 2.00E-04 | NA | NA | 0.0013 | 0 |
| NM_001129842 | CACNA1C | 0 | 0.308950477055884 | 1 | 2.00E-04 | NA | NA | 0.0013 | 0 |
| NM_001129834 | CACNA1C | 0 | 0.308950477055884 | 1 | 2.00E-04 | NA | NA | 0.0013 | 0 |
| NM_001129838 | CACNA1C | 0 | 0.308950477055884 | 1 | 2.00E-04 | NA | NA | 0.0013 | 0 |
| NM_001129837 | CACNA1C | 0 | 0.308950477055884 | 1 | 2.00E-04 | NA | NA | 0.0013 | 0 |
| NM_001129833 | CACNA1C | 0 | 0.308950477055884 | 1 | 2.00E-04 | NA | NA | 0.0013 | 0 |
| NM_001129846 | CACNA1C | 0 | 0.308950477055884 | 1 | 2.00E-04 | NA | NA | 0.0013 | 0 |
| NM_001167623 | CACNA1C | 0 | 0.308950477055884 | 1 | 2.00E-04 | NA | NA | 0.0013 | 0 |
| NM_001129839 | CACNA1C | 0 | 0.308950477055884 | 1 | 2.00E-04 | NA | NA | 0.0013 | 0 |
| NM_001167624 | CACNA1C | 0 | 0.308950477055884 | 1 | 2.00E-04 | NA | NA | 0.0013 | 0 |
| NM_001129836 | CACNA1C | 0 | 0.308950477055884 | 1 | 2.00E-04 | NA | NA | 0.0013 | 0 |
| NM_001129835 | CACNA1C | 0 | 0.308950477055884 | 1 | 2.00E-04 | NA | NA | 0.0013 | 0 |
| NM_199460    | CACNA1C | 0 | 0.308950477055884 | 1 | 2.00E-04 | NA | NA | 0.0013 | 0 |
| NM_019109    | ALG1    | 0 | 0.308950477055884 | 1 | 2.00E-04 | NA | NA | 0.0013 | 0 |
| NM_181689    | NNAT    | 0 | 0.308950477055884 | 1 | 2.00E-04 | NA | NA | 0.0013 | 0 |
| NM_005386    | NNAT    | 0 | 0.308950477055884 | 1 | 2.00E-04 | NA | NA | 0.0013 | 0 |
| NM_022120    | OXCT2   | 0 | 0.308950477055884 | 1 | 2.00E-04 | NA | NA | 0.0013 | 0 |
| NM_001164280 | SLC37A4 | 0 | 0.308950477055884 | 1 | 2.00E-04 | NA | NA | 0.0013 | 0 |
| NM_001034836 | RDM1    | 0 | 0.308950477055884 | 1 | 2.00E-04 | NA | NA | 0.0013 | 0 |
| NM_001163121 | RDM1    | 0 | 0.308950477055884 | 1 | 2.00E-04 | NA | NA | 0.0013 | 0 |
| NM_001163120 | RDM1    | 0 | 0.308950477055884 | 1 | 2.00E-04 | NA | NA | 0.0013 | 0 |
| NM_145654    | RDM1    | 0 | 0.308950477055884 | 1 | 2.00E-04 | NA | NA | 0.0013 | 0 |
| NR_027998    | RDM1    | 0 | 0.308950477055884 | 1 | 2.00E-04 | NA | NA | 0.0013 | 0 |
| NR_027997    | RDM1    | 0 | 0.308950477055884 | 1 | 2.00E-04 | NA | NA | 0.0013 | 0 |
| NR_027996    | RDM1    | 0 | 0.308950477055884 | 1 | 2.00E-04 | NA | NA | 0.0013 | 0 |
| NM_001077198 | ATG9A   | 0 | 0.308950477055884 | 1 | 2.00E-04 | NA | NA | 0.0013 | 0 |
| NM_024085    | ATG9A   | 0 | 0.308950477055884 | 1 | 2.00E-04 | NA | NA | 0.0013 | 0 |
| NR_104255    | ATG9A   | 0 | 0.308950477055884 | 1 | 2.00E-04 | NA | NA | 0.0013 | 0 |
| NM_203295    | TRIM7   | 0 | 0.308950477055884 | 1 | 2.00E-04 | NA | NA | 0.0013 | 0 |
| NM_203294    | TRIM7   | 0 | 0.308950477055884 | 1 | 2.00E-04 | NA | NA | 0.0013 | 0 |
| NM_203296    | TRIM7   | 0 | 0.308950477055884 | 1 | 2.00E-04 | NA | NA | 0.0013 | 0 |
| NM_001199096 | BAIAP3  | 0 | 0.309404815992731 | 1 | 2.00E-04 | NA | NA | 0.0013 | 0 |
| NM_022128    | RBKS    | 0 | 0.309404815992731 | 1 | 2.00E-04 | NA | NA | 0.0013 | 0 |

|              |           |                    |                   |        |          |    |    |        |          |
|--------------|-----------|--------------------|-------------------|--------|----------|----|----|--------|----------|
| NM_001259    | CDK6      | 0                  | 0.309404815992731 | 1      | 2.00E-04 | NA | NA | 0.0013 | 0        |
| NM_020125    | SLAMF8    | 0                  | 0.309859154929577 | 1      | 2.00E-04 | NA | NA | 0.0013 | 0        |
| NM_004578    | RAB4A     | 0                  | 0.309859154929577 | 1      | 2.00E-04 | NA | NA | 0.0013 | 0        |
| NR_073545    | RAB4A     | 0                  | 0.309859154929577 | 1      | 2.00E-04 | NA | NA | 0.0013 | 0        |
| NM_001271998 | RAB4A     | 0                  | 0.309859154929577 | 1      | 2.00E-04 | NA | NA | 0.0013 | 0        |
| NM_152441    | FBXL14    | 0                  | 0.309859154929577 | 1      | 2.00E-04 | NA | NA | 0.0013 | 0        |
| NM_017910    | TRMT61B   | 0                  | 0.309859154929577 | 1      | 2.00E-04 | NA | NA | 0.0013 | 0        |
| NM_001271318 | ZNF512    | 0.0109041344843253 | 0.320763289413903 | 1      | 2.00E-04 | NA | NA | 0.0013 | 0        |
| NM_032434    | ZNF512    | 0.0109041344843253 | 0.320763289413903 | 1      | 2.00E-04 | NA | NA | 0.0013 | 0        |
| NM_001271288 | ZNF512    | 0.0109041344843253 | 0.320763289413903 | 1      | 2.00E-04 | NA | NA | 0.0013 | 0        |
| NM_001271287 | ZNF512    | 0.0109041344843253 | 0.320763289413903 | 1      | 2.00E-04 | NA | NA | 0.0013 | 0        |
| NM_001271289 | ZNF512    | 0.0109041344843253 | 0.320763289413903 | 1      | 2.00E-04 | NA | NA | 0.0013 | 0        |
| NM_001271286 | ZNF512    | 0.0109041344843253 | 0.320763289413903 | 1      | 2.00E-04 | NA | NA | 0.0013 | 0        |
| NM_005981    | TSPAN31   | 0                  | 0.310313493866424 | 1      | 2.00E-04 | NA | NA | 0.0013 | 0        |
| NM_014272    | ADAMTS7   | 0                  | 0.310313493866424 | 1      | 2.00E-04 | NA | NA | 0.0013 | 0        |
| NM_001134420 | CDC7      | 0                  | 0.310767832803271 | 1      | 2.00E-04 | NA | NA | 0.0013 | 0        |
| NM_001134419 | CDC7      | 0                  | 0.310767832803271 | 1      | 2.00E-04 | NA | NA | 0.0013 | 0        |
| NM_003503    | CDC7      | 0                  | 0.310767832803271 | 1      | 2.00E-04 | NA | NA | 0.0013 | 0        |
| NM_001130415 | APOLD1    | 0                  | 0.310767832803271 | 1      | 2.00E-04 | NA | NA | 0.0013 | 0        |
| NM_194318    | B3GALTL   | 0                  | 0.310767832803271 | 1      | 2.00E-04 | NA | NA | 0.0013 | 0        |
| NM_004112    | FGF11     | 0                  | 0.310767832803271 | 1      | 2.00E-04 | NA | NA | 0.0013 | 0        |
| NM_013360    | ZNF222    | 0                  | 0.310767832803271 | 1      | 2.00E-04 | NA | NA | 0.0013 | 0        |
| NM_001129996 | ZNF222    | 0                  | 0.310767832803271 | 1      | 2.00E-04 | NA | NA | 0.0013 | 0        |
| NM_001162498 | LPAR6     | 0                  | 0.310767832803271 | 1      | 2.00E-04 | NA | NA | 0.0013 | 0        |
| NM_133499    | SYN1      | 0                  | 0.310767832803271 | 1      | 2.00E-04 | NA | NA | 0.0013 | 0        |
| NM_006950    | SYN1      | 0                  | 0.310767832803271 | 1      | 2.00E-04 | NA | NA | 0.0013 | 0        |
| NM_001206839 | PTPRZ1    | 0.0699681962744207 | 0.380736029077692 | 1      | 2.00E-04 | NA | NA | 0.0013 | 0        |
| NM_002851    | PTPRZ1    | 0.0699681962744207 | 0.380736029077692 | 1      | 2.00E-04 | NA | NA | 0.0013 | 0        |
| NM_001206838 | PTPRZ1    | 0.0699681962744207 | 0.380736029077692 | 1      | 2.00E-04 | NA | NA | 0.0013 | 0        |
| NM_006191    | PA2G4     | 0                  | 0.311222171740118 | 1      | 2.00E-04 | NA | NA | 0.0013 | 0        |
| NR_038927    | DDX11-AS1 | 0                  | 0.311222171740118 | 1      | 0.0014   | NA | NA | 0.0087 | 2.00E-04 |
| NR_028102    | THUMPD2   | 0                  | 0.311222171740118 | 1      | 2.00E-04 | NA | NA | 0.0013 | 0        |
| NM_025264    | THUMPD2   | 0                  | 0.311222171740118 | 1      | 2.00E-04 | NA | NA | 0.0013 | 0        |
| NM_005544    | IRS1      | 0                  | 0.311222171740118 | 1      | 0.0104   | NA | NA | 0.0539 | 0.0015   |
| NM_006514    | SCN10A    | 0                  | 0.311222171740118 | 1      | 2.00E-04 | NA | NA | 0.0013 | 0        |
| NM_004656    | BAP1      | 0                  | 0.311222171740118 | 1      | 0.0042   | NA | NA | 0.0251 | 6.00E-04 |
| NM_000067    | CA2       | 0.112676056338028  | 0.424352567014993 | 1      | 2.00E-04 | NA | NA | 0.0013 | 0        |
| NM_014426    | SNX5      | 0                  | 0.311676510676965 | 1      | 2.00E-04 | NA | NA | 0.0013 | 0        |
| NM_001282454 | SNX5      | 0                  | 0.311676510676965 | 1      | 2.00E-04 | NA | NA | 0.0013 | 0        |
| NM_152227    | SNX5      | 0                  | 0.311676510676965 | 1      | 2.00E-04 | NA | NA | 0.0013 | 0        |
| NM_032109    | OTP       | 0                  | 0.311676510676965 | 0.9998 | 8.00E-04 | NA | NA | 0.0045 | 1.00E-04 |
| NM_003783    | B3GALT2   | 0.155383916401636  | 0.467514766015448 | 1      | 2.00E-04 | NA | NA | 0.0013 | 0        |
| NM_152731    | BEND6     | 0                  | 0.312130849613812 | 1      | 2.00E-04 | NA | NA | 0.0013 | 0        |
| NM_001042717 | GTPBP10   | 0                  | 0.312130849613812 | 1      | 2.00E-04 | NA | NA | 0.0013 | 0        |

|              |              |   |                   |        |          |    |    |        |          |
|--------------|--------------|---|-------------------|--------|----------|----|----|--------|----------|
| NM_033107    | GTPBP10      | 0 | 0.312130849613812 | 1      | 2.00E-04 | NA | NA | 0.0013 | 0        |
| NM_014390    | SND1         | 0 | 0.312130849613812 | 1      | 2.00E-04 | NA | NA | 0.0013 | 0        |
| NM_004034    | ANXA7        | 0 | 0.312130849613812 | 1      | 2.00E-04 | NA | NA | 0.0013 | 0        |
| NM_001156    | ANXA7        | 0 | 0.312130849613812 | 1      | 2.00E-04 | NA | NA | 0.0013 | 0        |
| NM_001178093 | BCAT1        | 0 | 0.312130849613812 | 1      | 2.00E-04 | NA | NA | 0.0013 | 0        |
| NM_003690    | PRKRA        | 0 | 0.312130849613812 | 1      | 2.00E-04 | NA | NA | 0.0013 | 0        |
| NM_078485    | COL9A1       | 0 | 0.312130849613812 | 1      | 2.00E-04 | NA | NA | 0.0013 | 0        |
| NM_001127389 | DUX4L5       | 0 | 0.312585188550659 | 1      | 2.00E-04 | NA | NA | 0.0013 | 0        |
| NM_012147    | DUX2         | 0 | 0.312585188550659 | 1      | 2.00E-04 | NA | NA | 0.0013 | 0        |
| NM_001278056 | LOC100653046 | 0 | 0.312585188550659 | 1      | 2.00E-04 | NA | NA | 0.0013 | 0        |
| NM_001127386 | DUX4L2       | 0 | 0.312585188550659 | 1      | 2.00E-04 | NA | NA | 0.0013 | 0        |
| NM_001164467 | DUX4L3       | 0 | 0.312585188550659 | 1      | 2.00E-04 | NA | NA | 0.0013 | 0        |
| NM_033178    | DUX4         | 0 | 0.312585188550659 | 1      | 2.00E-04 | NA | NA | 0.0013 | 0        |
| NM_001177376 | DUX4L4       | 0 | 0.312585188550659 | 1      | 2.00E-04 | NA | NA | 0.0013 | 0        |
| NM_001127387 | DUX4L7       | 0 | 0.312585188550659 | 1      | 2.00E-04 | NA | NA | 0.0013 | 0        |
| NM_001127388 | DUX4L6       | 0 | 0.312585188550659 | 1      | 2.00E-04 | NA | NA | 0.0013 | 0        |
| NM_001204151 | MBD1         | 0 | 0.312585188550659 | 1      | 2.00E-04 | NA | NA | 0.0013 | 0        |
| NM_014649    | SABF2        | 0 | 0.312585188550659 | 0.9988 | 0.0018   | NA | NA | 0.0087 | 3.00E-04 |
| NM_181600    | KRTAP13-4    | 0 | 0.313039527487506 | 1      | 2.00E-04 | NA | NA | 0.0013 | 0        |
| NM_001193453 | TMEM116      | 0 | 0.313039527487506 | 1      | 4.00E-04 | NA | NA | 0.0029 | 1.00E-04 |
| NM_001193531 | TMEM116      | 0 | 0.313039527487506 | 1      | 6.00E-04 | NA | NA | 0.0039 | 1.00E-04 |
| NM_138341    | TMEM116      | 0 | 0.313039527487506 | 1      | 6.00E-04 | NA | NA | 0.0039 | 1.00E-04 |
| NM_001135701 | YWHAZ        | 0 | 0.313039527487506 | 1      | 2.00E-04 | NA | NA | 0.0013 | 0        |
| NM_145690    | YWHAZ        | 0 | 0.313039527487506 | 1      | 2.00E-04 | NA | NA | 0.0013 | 0        |
| NM_001135700 | YWHAZ        | 0 | 0.313039527487506 | 1      | 2.00E-04 | NA | NA | 0.0013 | 0        |
| NM_130806    | RXFP2        | 0 | 0.313493866424353 | 1      | 2.00E-04 | NA | NA | 0.0013 | 0        |
| NM_001166058 | RXFP2        | 0 | 0.313493866424353 | 1      | 2.00E-04 | NA | NA | 0.0013 | 0        |
| NM_015454    | LARP7        | 0 | 0.313493866424353 | 1      | 2.00E-04 | NA | NA | 0.0013 | 0        |
| NM_003401    | XRCC4        | 0 | 0.313493866424353 | 0.998  | 0.0018   | NA | NA | 0.0087 | 3.00E-04 |
| NM_022550    | XRCC4        | 0 | 0.313493866424353 | 0.9982 | 0.0024   | NA | NA | 0.0162 | 4.00E-04 |
| NM_022406    | XRCC4        | 0 | 0.313493866424353 | 0.9976 | 0.0016   | NA | NA | 0.0087 | 2.00E-04 |
| NM_001243797 | TSC22D1      | 0 | 0.313493866424353 | 1      | 2.00E-04 | NA | NA | 0.0013 | 0        |
| NM_006022    | TSC22D1      | 0 | 0.313493866424353 | 1      | 2.00E-04 | NA | NA | 0.0013 | 0        |
| NM_030966    | KRTAP1-3     | 0 | 0.313493866424353 | 1      | 2.00E-04 | NA | NA | 0.0013 | 0        |
| NM_001037339 | PDE4B        | 0 | 0.313948205361199 | 1      | 2.00E-04 | NA | NA | 0.0013 | 0        |
| NM_024838    | THNSL1       | 0 | 0.313948205361199 | 1      | 2.00E-04 | NA | NA | 0.0013 | 0        |
| NM_153034    | ZNF488       | 0 | 0.313948205361199 | 1      | 8.00E-04 | NA | NA | 0.0045 | 1.00E-04 |
| NM_001278216 | CDK5RAP3     | 0 | 0.313948205361199 | 1      | 2.00E-04 | NA | NA | 0.0013 | 0        |
| NM_001278197 | CDK5RAP3     | 0 | 0.313948205361199 | 1      | 2.00E-04 | NA | NA | 0.0013 | 0        |
| NM_176096    | CDK5RAP3     | 0 | 0.313948205361199 | 1      | 2.00E-04 | NA | NA | 0.0013 | 0        |
| NM_001278198 | CDK5RAP3     | 0 | 0.313948205361199 | 1      | 2.00E-04 | NA | NA | 0.0013 | 0        |
| NM_001278217 | CDK5RAP3     | 0 | 0.313948205361199 | 1      | 2.00E-04 | NA | NA | 0.0013 | 0        |
| NM_021619    | PRDM12       | 0 | 0.313948205361199 | 1      | 6.00E-04 | NA | NA | 0.0039 | 1.00E-04 |
| NM_003966    | SEMA5A       | 0 | 0.313948205361199 | 1      | 2.00E-04 | NA | NA | 0.0013 | 0        |

|              |             |                    |                   |        |          |    |    |        |          |
|--------------|-------------|--------------------|-------------------|--------|----------|----|----|--------|----------|
| NM_005836    | HRSP12      | 0                  | 0.313948205361199 | 1      | 2.00E-04 | NA | NA | 0.0013 | 0        |
| NM_001003750 | OR8I2       | 0                  | 0.314402544298046 | 1      | 2.00E-04 | NA | NA | 0.0013 | 0        |
| NM_001130017 | ART3        | 0                  | 0.314402544298046 | 1      | 2.00E-04 | NA | NA | 0.0013 | 0        |
| NM_178562    | TSPAN33     | 0                  | 0.314402544298046 | 1      | 2.00E-04 | NA | NA | 0.0013 | 0        |
| NM_001029880 | SFMBT2      | 0                  | 0.314402544298046 | 1      | 2.00E-04 | NA | NA | 0.0013 | 0        |
| NM_145010    | ENKUR       | 0                  | 0.314402544298046 | 1      | 2.00E-04 | NA | NA | 0.0013 | 0        |
| NR_072993    | ENKUR       | 0                  | 0.314402544298046 | 1      | 2.00E-04 | NA | NA | 0.0013 | 0        |
| NR_072992    | ENKUR       | 0                  | 0.314402544298046 | 1      | 2.00E-04 | NA | NA | 0.0013 | 0        |
| NR_034154    | COLCA1      | 0                  | 0.314402544298046 | 1      | 2.00E-04 | NA | NA | 0.0013 | 0        |
| NM_001199805 | KLRC4-KLRK1 | 0                  | 0.314402544298046 | 1      | 2.00E-04 | NA | NA | 0.0013 | 0        |
| NM_015421    | TMEM186     | 0                  | 0.314402544298046 | 1      | 2.00E-04 | NA | NA | 0.0013 | 0        |
| NR_036231    | MIR4264     | 0                  | 0.314402544298046 | 1      | 2.00E-04 | NA | NA | 0.0013 | 0        |
| NM_022483    | C5orf28     | 0                  | 0.314402544298046 | 1      | 2.00E-04 | NA | NA | 0.0013 | 0        |
| NM_006150    | PRICKLE3    | 0                  | 0.314402544298046 | 1      | 2.00E-04 | NA | NA | 0.0013 | 0        |
| NM_001987    | ETV6        | 0                  | 0.314856883234893 | 1      | 2.00E-04 | NA | NA | 0.0013 | 0        |
| NR_047005    | LINC00381   | 0                  | 0.314856883234893 | 1      | 2.00E-04 | NA | NA | 0.0013 | 0        |
| NM_017551    | GRID1       | 0                  | 0.314856883234893 | 1      | 2.00E-04 | NA | NA | 0.0013 | 0        |
| NM_001004064 | OR8J3       | 0                  | 0.314856883234893 | 1      | 2.00E-04 | NA | NA | 0.0013 | 0        |
| NM_024927    | PLEKHH3     | 0                  | 0.314856883234893 | 1      | 2.00E-04 | NA | NA | 0.0013 | 0        |
| NR_073573    | PLEKHH3     | 0                  | 0.314856883234893 | 1      | 2.00E-04 | NA | NA | 0.0013 | 0        |
| NM_001282670 | C1orf86     | 0                  | 0.31531122217174  | 1      | 2.00E-04 | NA | NA | 0.0013 | 0        |
| NR_046424    | C1orf86     | 0                  | 0.31531122217174  | 1      | 2.00E-04 | NA | NA | 0.0013 | 0        |
| NR_024554    | RHOBTB1     | 0                  | 0.31531122217174  | 1      | 2.00E-04 | NA | NA | 0.0013 | 0        |
| NM_000943    | PPIC        | 0                  | 0.31531122217174  | 1      | 2.00E-04 | NA | NA | 0.0013 | 0        |
| NM_001127206 | HMOX2       | 0                  | 0.315765561108587 | 1      | 0.0088   | NA | NA | 0.0539 | 0.0013   |
| NM_001200019 | OPRL1       | 0                  | 0.315765561108587 | 1      | 8.00E-04 | NA | NA | 0.0045 | 1.00E-04 |
| NM_173812    | DPY19L2     | 0                  | 0.315765561108587 | 1      | 2.00E-04 | NA | NA | 0.0013 | 0        |
| NM_019079    | L1TD1       | 0                  | 0.316219900045434 | 1      | 2.00E-04 | NA | NA | 0.0013 | 0        |
| NM_001164835 | L1TD1       | 0                  | 0.316219900045434 | 1      | 2.00E-04 | NA | NA | 0.0013 | 0        |
| NM_138320    | PCSK6       | 0                  | 0.316219900045434 | 1      | 2.00E-04 | NA | NA | 0.0013 | 0        |
| NM_138322    | PCSK6       | 0                  | 0.316219900045434 | 1      | 2.00E-04 | NA | NA | 0.0013 | 0        |
| NM_138321    | PCSK6       | 0                  | 0.316219900045434 | 1      | 4.00E-04 | NA | NA | 0.0029 | 1.00E-04 |
| NM_138319    | PCSK6       | 0                  | 0.316219900045434 | 1      | 4.00E-04 | NA | NA | 0.0029 | 1.00E-04 |
| NM_138323    | PCSK6       | 0                  | 0.316219900045434 | 1      | 2.00E-04 | NA | NA | 0.0013 | 0        |
| NM_002570    | PCSK6       | 0                  | 0.316219900045434 | 1      | 2.00E-04 | NA | NA | 0.0013 | 0        |
| NM_138324    | PCSK6       | 0                  | 0.316219900045434 | 1      | 2.00E-04 | NA | NA | 0.0013 | 0        |
| NM_138325    | PCSK6       | 0                  | 0.316219900045434 | 1      | 2.00E-04 | NA | NA | 0.0013 | 0        |
| NM_033176    | NKX2-4      | 0                  | 0.316219900045434 | 0.9974 | 0.0034   | NA | NA | 0.0173 | 5.00E-04 |
| NR_036208    | MIR4323     | 0.0945024988641527 | 0.410722398909587 | 1      | 2.00E-04 | NA | NA | 0.0013 | 0        |
| NM_001135256 | RBBP4       | 0                  | 0.316674238982281 | 0.9978 | 0.0024   | NA | NA | 0.0162 | 4.00E-04 |
| NM_005610    | RBBP4       | 0                  | 0.316674238982281 | 0.9978 | 0.002    | NA | NA | 0.0087 | 3.00E-04 |
| NM_001135255 | RBBP4       | 0                  | 0.316674238982281 | 0.9992 | 0.0024   | NA | NA | 0.0162 | 4.00E-04 |
| NM_006006    | ZBTB16      | 0                  | 0.316674238982281 | 1      | 2.00E-04 | NA | NA | 0.0013 | 0        |
| NM_178499    | CCDC60      | 0                  | 0.316674238982281 | 1      | 2.00E-04 | NA | NA | 0.0013 | 0        |

|              |           |                   |                   |        |          |    |    |        |          |
|--------------|-----------|-------------------|-------------------|--------|----------|----|----|--------|----------|
| NM_001102668 | PSMA4     | 0                 | 0.316674238982281 | 1      | 2.00E-04 | NA | NA | 0.0013 | 0        |
| NM_001102667 | PSMA4     | 0                 | 0.316674238982281 | 1      | 2.00E-04 | NA | NA | 0.0013 | 0        |
| NM_002789    | PSMA4     | 0                 | 0.316674238982281 | 1      | 2.00E-04 | NA | NA | 0.0013 | 0        |
| NM_014573    | TMEM97    | 0                 | 0.316674238982281 | 1      | 2.00E-04 | NA | NA | 0.0013 | 0        |
| NM_003854    | IL1RL2    | 0                 | 0.316674238982281 | 1      | 2.00E-04 | NA | NA | 0.0013 | 0        |
| NM_001256422 | AGPAT9    | 0                 | 0.316674238982281 | 1      | 2.00E-04 | NA | NA | 0.0013 | 0        |
| NM_001256421 | AGPAT9    | 0                 | 0.316674238982281 | 1      | 2.00E-04 | NA | NA | 0.0013 | 0        |
| NM_032717    | AGPAT9    | 0                 | 0.316674238982281 | 1      | 2.00E-04 | NA | NA | 0.0013 | 0        |
| NM_001039762 | FAM196A   | 0                 | 0.316674238982281 | 1      | 2.00E-04 | NA | NA | 0.0013 | 0        |
| NM_006297    | XRCC1     | 0                 | 0.316674238982281 | 1      | 2.00E-04 | NA | NA | 0.0013 | 0        |
| NM_139246    | TSTD2     | 0                 | 0.316674238982281 | 0.9988 | 0.0018   | NA | NA | 0.0087 | 3.00E-04 |
| NM_001013356 | OR8U8     | 0.112221717401181 | 0.429350295320309 | 1      | 2.00E-04 | NA | NA | 0.0013 | 0        |
| NM_001005204 | OR8U1     | 0.112221717401181 | 0.429350295320309 | 1      | 2.00E-04 | NA | NA | 0.0013 | 0        |
| NM_006258    | PRKG1     | 0                 | 0.317128577919128 | 1      | 2.00E-04 | NA | NA | 0.0013 | 0        |
| NM_005192    | CDKN3     | 0                 | 0.317128577919128 | 1      | 2.00E-04 | NA | NA | 0.0013 | 0        |
| NM_001130851 | CDKN3     | 0                 | 0.317128577919128 | 1      | 2.00E-04 | NA | NA | 0.0013 | 0        |
| NM_002815    | PSMD11    | 0                 | 0.317128577919128 | 1      | 2.00E-04 | NA | NA | 0.0013 | 0        |
| NM_001270482 | PSMD11    | 0                 | 0.317128577919128 | 1      | 2.00E-04 | NA | NA | 0.0013 | 0        |
| NM_001077620 | PRCD      | 0                 | 0.317128577919128 | 1      | 2.00E-04 | NA | NA | 0.0013 | 0        |
| NM_202002    | FOX1      | 0                 | 0.317128577919128 | 1      | 2.00E-04 | NA | NA | 0.0013 | 0        |
| NM_021953    | FOX1      | 0                 | 0.317128577919128 | 1      | 2.00E-04 | NA | NA | 0.0013 | 0        |
| NM_001243088 | FOX1      | 0                 | 0.317128577919128 | 1      | 2.00E-04 | NA | NA | 0.0013 | 0        |
| NM_001243089 | FOX1      | 0                 | 0.317128577919128 | 1      | 2.00E-04 | NA | NA | 0.0013 | 0        |
| NM_202003    | FOX1      | 0                 | 0.317128577919128 | 1      | 2.00E-04 | NA | NA | 0.0013 | 0        |
| NR_015419    | LOC145783 | 0                 | 0.317128577919128 | 1      | 2.00E-04 | NA | NA | 0.0013 | 0        |
| NM_012318    | LETM1     | 0                 | 0.317128577919128 | 0.9844 | 0.0164   | NA | NA | 0.1281 | 0.0023   |
| NM_182592    | YIPF7     | 0                 | 0.317128577919128 | 1      | 2.00E-04 | NA | NA | 0.0013 | 0        |
| NM_020144    | PAPOLB    | 0                 | 0.317128577919128 | 1      | 2.00E-04 | NA | NA | 0.0013 | 0        |
| NM_001001346 | CLDN20    | 0.184461608359836 | 0.502044525215811 | 1      | 2.00E-04 | NA | NA | 0.0013 | 0        |
| NM_015448    | DPCD      | 0                 | 0.317582916855975 | 1      | 2.00E-04 | NA | NA | 0.0013 | 0        |
| NM_003702    | RGS20     | 0                 | 0.317582916855975 | 1      | 2.00E-04 | NA | NA | 0.0013 | 0        |
| NM_178547    | ZBTB80S   | 0                 | 0.317582916855975 | 1      | 0.001    | NA | NA | 0.0054 | 2.00E-04 |
| NM_001111061 | NHLH2     | 0                 | 0.317582916855975 | 1      | 2.00E-04 | NA | NA | 0.0013 | 0        |
| NM_001207024 | M6PR      | 0                 | 0.317582916855975 | 1      | 2.00E-04 | NA | NA | 0.0013 | 0        |
| NM_002355    | M6PR      | 0                 | 0.317582916855975 | 1      | 2.00E-04 | NA | NA | 0.0013 | 0        |
| NM_006575    | MAP4K5    | 0                 | 0.317582916855975 | 1      | 2.00E-04 | NA | NA | 0.0013 | 0        |
| NM_198794    | MAP4K5    | 0                 | 0.317582916855975 | 1      | 2.00E-04 | NA | NA | 0.0013 | 0        |
| NM_015964    | TPPP3     | 0                 | 0.317582916855975 | 1      | 2.00E-04 | NA | NA | 0.0013 | 0        |
| NM_016140    | TPPP3     | 0                 | 0.317582916855975 | 1      | 2.00E-04 | NA | NA | 0.0013 | 0        |
| NM_001004059 | OR4S2     | 0                 | 0.318037255792821 | 1      | 4.00E-04 | NA | NA | 0.0029 | 1.00E-04 |
| NM_001846    | COL4A2    | 0                 | 0.318037255792821 | 1      | 2.00E-04 | NA | NA | 0.0013 | 0        |
| NM_001199775 | CPD       | 0                 | 0.318037255792821 | 1      | 2.00E-04 | NA | NA | 0.0013 | 0        |
| NM_014408    | TRAPPC3   | 0                 | 0.318037255792821 | 1      | 4.00E-04 | NA | NA | 0.0029 | 1.00E-04 |
| NR_073097    | TRAPPC3   | 0                 | 0.318037255792821 | 1      | 2.00E-04 | NA | NA | 0.0013 | 0        |

|              |            |                    |                   |        |          |    |    |        |          |
|--------------|------------|--------------------|-------------------|--------|----------|----|----|--------|----------|
| NM_001270896 | TRAPPC3    | 0                  | 0.318037255792821 | 1      | 2.00E-04 | NA | NA | 0.0013 | 0        |
| NM_001270894 | TRAPPC3    | 0                  | 0.318037255792821 | 1      | 2.00E-04 | NA | NA | 0.0013 | 0        |
| NM_001270897 | TRAPPC3    | 0                  | 0.318037255792821 | 1      | 2.00E-04 | NA | NA | 0.0013 | 0        |
| NR_073098    | TRAPPC3    | 0                  | 0.318037255792821 | 1      | 2.00E-04 | NA | NA | 0.0013 | 0        |
| NM_001166504 | ADH7       | 0                  | 0.318037255792821 | 1      | 2.00E-04 | NA | NA | 0.0013 | 0        |
| NM_015714    | GOS2       | 0                  | 0.318945933666515 | 1      | 2.00E-04 | NA | NA | 0.0013 | 0        |
| NM_021214    | ABHD17C    | 0                  | 0.318945933666515 | 1      | 2.00E-04 | NA | NA | 0.0013 | 0        |
| NM_001012419 | ANKRD20A3  | 0                  | 0.318945933666515 | 1      | 0.0028   | NA | NA | 0.0173 | 4.00E-04 |
| NM_033518    | SLC38A5    | 0                  | 0.318945933666515 | 1      | 2.00E-04 | NA | NA | 0.0013 | 0        |
| NR_001546    | TTY20      | 0                  | 0.318945933666515 | 0.9906 | 0.0068   | NA | NA | 0.0539 | 0.001    |
| NM_000333    | ATXN7      | 0                  | 0.319400272603362 | 1      | 2.00E-04 | NA | NA | 0.0013 | 0        |
| NM_015655    | ZNF337     | 0                  | 0.319400272603362 | 1      | 2.00E-04 | NA | NA | 0.0013 | 0        |
| NM_001243194 | INPP5F     | 0                  | 0.319854611540209 | 1      | 2.00E-04 | NA | NA | 0.0013 | 0        |
| NM_003898    | SYNJ2      | 0                  | 0.319854611540209 | 1      | 2.00E-04 | NA | NA | 0.0013 | 0        |
| NM_001270643 | LUC7L2     | 0                  | 0.319854611540209 | 1      | 6.00E-04 | NA | NA | 0.0039 | 1.00E-04 |
| NM_016019    | LUC7L2     | 0                  | 0.319854611540209 | 1      | 4.00E-04 | NA | NA | 0.0029 | 1.00E-04 |
| NR_031707    | MIR1307    | 0                  | 0.319854611540209 | 1      | 2.00E-04 | NA | NA | 0.0013 | 0        |
| NM_001278613 | PCDH1      | 0                  | 0.319854611540209 | 1      | 2.00E-04 | NA | NA | 0.0013 | 0        |
| NM_030769    | NPL        | 0                  | 0.320308950477056 | 1      | 2.00E-04 | NA | NA | 0.0013 | 0        |
| NM_001200051 | NPL        | 0                  | 0.320308950477056 | 1      | 2.00E-04 | NA | NA | 0.0013 | 0        |
| NM_001200050 | NPL        | 0                  | 0.320308950477056 | 1      | 2.00E-04 | NA | NA | 0.0013 | 0        |
| NM_001200052 | NPL        | 0                  | 0.320308950477056 | 1      | 2.00E-04 | NA | NA | 0.0013 | 0        |
| NM_001200056 | NPL        | 0                  | 0.320308950477056 | 1      | 2.00E-04 | NA | NA | 0.0013 | 0        |
| NR_036610    | SRSF3      | 0                  | 0.320308950477056 | 1      | 2.00E-04 | NA | NA | 0.0013 | 0        |
| NM_003017    | SRSF3      | 0                  | 0.320308950477056 | 1      | 2.00E-04 | NA | NA | 0.0013 | 0        |
| NM_133450    | ANKS3      | 0                  | 0.320308950477056 | 1      | 2.00E-04 | NA | NA | 0.0013 | 0        |
| NM_001242929 | ANKS3      | 0                  | 0.320308950477056 | 1      | 2.00E-04 | NA | NA | 0.0013 | 0        |
| NR_040252    | ANKS3      | 0                  | 0.320308950477056 | 1      | 2.00E-04 | NA | NA | 0.0013 | 0        |
| NM_001080744 | DGKG       | 0                  | 0.320308950477056 | 1      | 2.00E-04 | NA | NA | 0.0013 | 0        |
| NM_001080745 | DGKG       | 0                  | 0.320308950477056 | 1      | 2.00E-04 | NA | NA | 0.0013 | 0        |
| NM_001346    | DGKG       | 0                  | 0.320308950477056 | 1      | 2.00E-04 | NA | NA | 0.0013 | 0        |
| NM_001100425 | KIAA0895   | 0                  | 0.320308950477056 | 1      | 2.00E-04 | NA | NA | 0.0013 | 0        |
| NM_001105574 | HMX3       | 0                  | 0.320763289413903 | 1      | 4.00E-04 | NA | NA | 0.0029 | 1.00E-04 |
| NM_021928    | SPCS3      | 0                  | 0.320763289413903 | 1      | 4.00E-04 | NA | NA | 0.0029 | 1.00E-04 |
| NR_024425    | PTGES2-AS1 | 0                  | 0.320763289413903 | 1      | 2.00E-04 | NA | NA | 0.0013 | 0        |
| NM_004468    | FHL3       | 0                  | 0.320763289413903 | 1      | 2.00E-04 | NA | NA | 0.0013 | 0        |
| NM_001243878 | FHL3       | 0                  | 0.320763289413903 | 1      | 2.00E-04 | NA | NA | 0.0013 | 0        |
| NM_003553    | OR1E1      | 0                  | 0.320763289413903 | 1      | 2.00E-04 | NA | NA | 0.0013 | 0        |
| NM_001004742 | OR5M3      | 0.0422535211267606 | 0.36347114947751  | 1      | 2.00E-04 | NA | NA | 0.0013 | 0        |
| NM_002157    | HSPE1      | 0                  | 0.32121762835075  | 1      | 2.00E-04 | NA | NA | 0.0013 | 0        |
| NM_001202485 | HSPE1-MOB4 | 0                  | 0.32121762835075  | 1      | 2.00E-04 | NA | NA | 0.0013 | 0        |
| NM_015531    | C2CD3      | 0                  | 0.32121762835075  | 1      | 2.00E-04 | NA | NA | 0.0013 | 0        |
| NM_153354    | TMEM161B   | 0                  | 0.32121762835075  | 1      | 2.00E-04 | NA | NA | 0.0013 | 0        |
| NM_001007540 | CDHR4      | 0                  | 0.321671967287597 | 1      | 2.00E-04 | NA | NA | 0.0013 | 0        |

|              |              |                    |                   |        |          |    |    |        |          |
|--------------|--------------|--------------------|-------------------|--------|----------|----|----|--------|----------|
| NR_002605    | DLEU1        | 0                  | 0.322126306224443 | 1      | 2.00E-04 | NA | NA | 0.0013 | 0        |
| NM_032830    | CIRH1A       | 0                  | 0.322126306224443 | 1      | 2.00E-04 | NA | NA | 0.0013 | 0        |
| NM_178313    | SPTBN1       | 0                  | 0.322126306224443 | 1      | 2.00E-04 | NA | NA | 0.0013 | 0        |
| NR_045562    | GULP1        | 0                  | 0.322126306224443 | 0.9968 | 0.0024   | NA | NA | 0.0162 | 4.00E-04 |
| NR_045563    | GULP1        | 0                  | 0.322126306224443 | 0.9966 | 0.0044   | NA | NA | 0.0251 | 6.00E-04 |
| NM_001029863 | C6orf120     | 0                  | 0.322126306224443 | 1      | 2.00E-04 | NA | NA | 0.0013 | 0        |
| NM_012141    | INTS6        | 0                  | 0.322126306224443 | 1      | 2.00E-04 | NA | NA | 0.0013 | 0        |
| NM_001039937 | INTS6        | 0                  | 0.322126306224443 | 1      | 2.00E-04 | NA | NA | 0.0013 | 0        |
| NM_001039938 | INTS6        | 0                  | 0.322126306224443 | 1      | 2.00E-04 | NA | NA | 0.0013 | 0        |
| NR_024455    | LOC100133612 | 0                  | 0.32258064516129  | 1      | 2.00E-04 | NA | NA | 0.0013 | 0        |
| NM_021992    | TMSB15A      | 0                  | 0.32258064516129  | 1      | 2.00E-04 | NA | NA | 0.0013 | 0        |
| NM_145278    | GCSAML       | 0                  | 0.323034984098137 | 1      | 2.00E-04 | NA | NA | 0.0013 | 0        |
| NM_001282456 | LOC100506127 | 0                  | 0.323034984098137 | 1      | 2.00E-04 | NA | NA | 0.0013 | 0        |
| NM_015466    | PTPN23       | 0                  | 0.323034984098137 | 1      | 2.00E-04 | NA | NA | 0.0013 | 0        |
| NM_001190801 | PLK4         | 0                  | 0.323034984098137 | 1      | 2.00E-04 | NA | NA | 0.0013 | 0        |
| NM_138576    | BCL11B       | 0                  | 0.323034984098137 | 1      | 2.00E-04 | NA | NA | 0.0013 | 0        |
| NM_001282237 | BCL11B       | 0                  | 0.323034984098137 | 1      | 2.00E-04 | NA | NA | 0.0013 | 0        |
| NM_001282238 | BCL11B       | 0                  | 0.323034984098137 | 1      | 2.00E-04 | NA | NA | 0.0013 | 0        |
| NM_022898    | BCL11B       | 0                  | 0.323034984098137 | 1      | 2.00E-04 | NA | NA | 0.0013 | 0        |
| NM_181356    | SUPT3H       | 0                  | 0.323034984098137 | 1      | 2.00E-04 | NA | NA | 0.0013 | 0        |
| NM_003599    | SUPT3H       | 0                  | 0.323034984098137 | 1      | 2.00E-04 | NA | NA | 0.0013 | 0        |
| NM_001261823 | SUPT3H       | 0                  | 0.323034984098137 | 1      | 2.00E-04 | NA | NA | 0.0013 | 0        |
| NM_003012    | SFRP1        | 0                  | 0.323034984098137 | 1      | 2.00E-04 | NA | NA | 0.0013 | 0        |
| NM_178352    | LCE1D        | 0.110858700590641  | 0.434348023625625 | 1      | 2.00E-04 | NA | NA | 0.0013 | 0        |
| NM_001105518 | SWT1         | 0                  | 0.323489323034984 | 1      | 2.00E-04 | NA | NA | 0.0013 | 0        |
| NM_001267727 | ARSG         | 0                  | 0.323489323034984 | 1      | 2.00E-04 | NA | NA | 0.0013 | 0        |
| NM_001276373 | USF1         | 0                  | 0.323489323034984 | 0.9994 | 6.00E-04 | NA | NA | 0.0039 | 1.00E-04 |
| NM_000424    | KRT5         | 0                  | 0.323489323034984 | 1      | 2.00E-04 | NA | NA | 0.0013 | 0        |
| NM_020418    | PCBP4        | 0                  | 0.323489323034984 | 1      | 2.00E-04 | NA | NA | 0.0013 | 0        |
| NM_053035    | MRPS33       | 0                  | 0.323489323034984 | 1      | 2.00E-04 | NA | NA | 0.0013 | 0        |
| NM_016071    | MRPS33       | 0                  | 0.323489323034984 | 1      | 2.00E-04 | NA | NA | 0.0013 | 0        |
| NM_001005205 | OR8J1        | 0.0467969104952294 | 0.37074057246706  | 1      | 2.00E-04 | NA | NA | 0.0013 | 0        |
| NM_024041    | SCNM1        | 0                  | 0.323943661971831 | 1      | 2.00E-04 | NA | NA | 0.0013 | 0        |
| NR_037937    | SCNM1        | 0                  | 0.323943661971831 | 1      | 2.00E-04 | NA | NA | 0.0013 | 0        |
| NM_001204856 | SCNM1        | 0                  | 0.323943661971831 | 1      | 2.00E-04 | NA | NA | 0.0013 | 0        |
| NM_001256236 | PGAP2        | 0                  | 0.323943661971831 | 1      | 2.00E-04 | NA | NA | 0.0013 | 0        |
| NR_045923    | PGAP2        | 0                  | 0.323943661971831 | 1      | 2.00E-04 | NA | NA | 0.0013 | 0        |
| NM_001145438 | PGAP2        | 0                  | 0.323943661971831 | 1      | 2.00E-04 | NA | NA | 0.0013 | 0        |
| NM_001256235 | PGAP2        | 0                  | 0.323943661971831 | 1      | 2.00E-04 | NA | NA | 0.0013 | 0        |
| NM_001256237 | PGAP2        | 0                  | 0.323943661971831 | 1      | 2.00E-04 | NA | NA | 0.0013 | 0        |
| NR_027017    | PGAP2        | 0                  | 0.323943661971831 | 1      | 2.00E-04 | NA | NA | 0.0013 | 0        |
| NR_045927    | PGAP2        | 0                  | 0.323943661971831 | 1      | 2.00E-04 | NA | NA | 0.0013 | 0        |
| NR_045926    | PGAP2        | 0                  | 0.323943661971831 | 1      | 2.00E-04 | NA | NA | 0.0013 | 0        |
| NR_045925    | PGAP2        | 0                  | 0.323943661971831 | 1      | 2.00E-04 | NA | NA | 0.0013 | 0        |

|              |           |                    |                   |        |          |    |    |        |          |
|--------------|-----------|--------------------|-------------------|--------|----------|----|----|--------|----------|
| NM_001283038 | PGAP2     | 0                  | 0.323943661971831 | 1      | 2.00E-04 | NA | NA | 0.0013 | 0        |
| NM_001283039 | PGAP2     | 0                  | 0.323943661971831 | 1      | 2.00E-04 | NA | NA | 0.0013 | 0        |
| NM_001283040 | PGAP2     | 0                  | 0.323943661971831 | 1      | 2.00E-04 | NA | NA | 0.0013 | 0        |
| NR_104270    | PGAP2     | 0                  | 0.323943661971831 | 1      | 2.00E-04 | NA | NA | 0.0013 | 0        |
| NR_104271    | PGAP2     | 0                  | 0.323943661971831 | 1      | 2.00E-04 | NA | NA | 0.0013 | 0        |
| NM_021104    | RPL41     | 0                  | 0.323943661971831 | 1      | 2.00E-04 | NA | NA | 0.0013 | 0        |
| NM_001035267 | RPL41     | 0                  | 0.323943661971831 | 1      | 2.00E-04 | NA | NA | 0.0013 | 0        |
| NM_015933    | TMA7      | 0                  | 0.323943661971831 | 1      | 2.00E-04 | NA | NA | 0.0013 | 0        |
| NM_004291    | CARTPT    | 0                  | 0.323943661971831 | 1      | 2.00E-04 | NA | NA | 0.0013 | 0        |
| NM_004794    | RAB33A    | 0                  | 0.323943661971831 | 1      | 2.00E-04 | NA | NA | 0.0013 | 0        |
| NM_023009    | MARCKSL1  | 0                  | 0.323943661971831 | 1      | 2.00E-04 | NA | NA | 0.0013 | 0        |
| NR_052852    | MARCKSL1  | 0                  | 0.323943661971831 | 1      | 2.00E-04 | NA | NA | 0.0013 | 0        |
| NM_001009925 | TMEM230   | 0                  | 0.323943661971831 | 1      | 2.00E-04 | NA | NA | 0.0013 | 0        |
| NM_001009924 | TMEM230   | 0                  | 0.323943661971831 | 1      | 2.00E-04 | NA | NA | 0.0013 | 0        |
| NM_001009923 | TMEM230   | 0                  | 0.323943661971831 | 1      | 2.00E-04 | NA | NA | 0.0013 | 0        |
| NM_014145    | TMEM230   | 0                  | 0.323943661971831 | 1      | 2.00E-04 | NA | NA | 0.0013 | 0        |
| NM_024607    | PPP1R3B   | 0                  | 0.323943661971831 | 1      | 2.00E-04 | NA | NA | 0.0013 | 0        |
| NM_173860    | HOXC12    | 0                  | 0.324398000908678 | 1      | 2.00E-04 | NA | NA | 0.0013 | 0        |
| NM_024712    | ELMO3     | 0                  | 0.324398000908678 | 1      | 2.00E-04 | NA | NA | 0.0013 | 0        |
| NM_178559    | ABC5      | 0                  | 0.324398000908678 | 1      | 2.00E-04 | NA | NA | 0.0013 | 0        |
| NM_001163993 | ABC5      | 0                  | 0.324398000908678 | 1      | 2.00E-04 | NA | NA | 0.0013 | 0        |
| NM_001163942 | ABC5      | 0                  | 0.324398000908678 | 1      | 2.00E-04 | NA | NA | 0.0013 | 0        |
| NM_000926    | PGR       | 0                  | 0.324398000908678 | 1      | 2.00E-04 | NA | NA | 0.0013 | 0        |
| NM_001278098 | GDNF      | 0                  | 0.324398000908678 | 1      | 2.00E-04 | NA | NA | 0.0013 | 0        |
| NR_039801    | MIR4657   | 0                  | 0.324398000908678 | 1      | 2.00E-04 | NA | NA | 0.0013 | 0        |
| NM_001130447 | HAUS2     | 0                  | 0.324852339845525 | 1      | 2.00E-04 | NA | NA | 0.0013 | 0        |
| NM_018097    | HAUS2     | 0                  | 0.324852339845525 | 1      | 2.00E-04 | NA | NA | 0.0013 | 0        |
| NM_007018    | CNTRL     | 0                  | 0.324852339845525 | 0.985  | 0.0158   | NA | NA | 0.1214 | 0.0023   |
| NM_004251    | RAB9A     | 0                  | 0.324852339845525 | 1      | 4.00E-04 | NA | NA | 0.0029 | 1.00E-04 |
| NM_001195328 | RAB9A     | 0                  | 0.324852339845525 | 0.9996 | 2.00E-04 | NA | NA | 0.0013 | 0        |
| NM_001527    | HDAC2     | 0                  | 0.324852339845525 | 1      | 0.025    | NA | NA | 0.1978 | 0.0035   |
| NR_033441    | HDAC2     | 0                  | 0.324852339845525 | 1      | 0.029    | NA | NA | 0.2157 | 0.0041   |
| NM_145172    | WDR63     | 0                  | 0.325306678782372 | 1      | 2.00E-04 | NA | NA | 0.0013 | 0        |
| NM_207040    | TCF12     | 0                  | 0.325306678782372 | 1      | 2.00E-04 | NA | NA | 0.0013 | 0        |
| NM_020188    | CMC2      | 0                  | 0.325306678782372 | 1      | 2.00E-04 | NA | NA | 0.0013 | 0        |
| NR_038230    | LOC284080 | 0                  | 0.325306678782372 | 1      | 2.00E-04 | NA | NA | 0.0013 | 0        |
| NM_033224    | PURB      | 0                  | 0.325306678782372 | 1      | 2.00E-04 | NA | NA | 0.0013 | 0        |
| NM_130776    | XAGE3     | 0                  | 0.325306678782372 | 1      | 2.00E-04 | NA | NA | 0.0013 | 0        |
| NM_001282382 | PTTG1     | 0.114039073148569  | 0.439800090867787 | 1      | 2.00E-04 | NA | NA | 0.0013 | 0        |
| NM_001282383 | PTTG1     | 0.114039073148569  | 0.439800090867787 | 1      | 2.00E-04 | NA | NA | 0.0013 | 0        |
| NM_153228    | ANKFN1    | 0.0159018627896411 | 0.34166288050886  | 1      | 2.00E-04 | NA | NA | 0.0013 | 0        |
| NM_152231    | FBXO34    | 0                  | 0.325761017719219 | 1      | 0.0108   | NA | NA | 0.0652 | 0.0016   |
| NM_032553    | GPR174    | 0                  | 0.325761017719219 | 1      | 2.00E-04 | NA | NA | 0.0013 | 0        |
| NM_020698    | TMCC3     | 0                  | 0.325761017719219 | 1      | 2.00E-04 | NA | NA | 0.0013 | 0        |



|              |            |                    |                   |        |          |    |    |        |          |
|--------------|------------|--------------------|-------------------|--------|----------|----|----|--------|----------|
| NM_000204    | CFI        | 0                  | 0.325761017719219 | 1      | 2.00E-04 | NA | NA | 0.0013 | 0        |
| NM_001282185 | ETF1       | 0                  | 0.325761017719219 | 1      | 2.00E-04 | NA | NA | 0.0013 | 0        |
| NM_006261    | PROP1      | 0                  | 0.325761017719219 | 1      | 2.00E-04 | NA | NA | 0.0013 | 0        |
| NM_007126    | VCP        | 0                  | 0.325761017719219 | 1      | 2.00E-04 | NA | NA | 0.0013 | 0        |
| NR_024059    | MIMT1      | 0                  | 0.326215356656065 | 1      | 2.00E-04 | NA | NA | 0.0013 | 0        |
| NM_013328    | PYCR2      | 0                  | 0.326215356656065 | 0.9988 | 0.0022   | NA | NA | 0.0087 | 3.00E-04 |
| NM_001271681 | PYCR2      | 0                  | 0.326215356656065 | 0.9986 | 0.0022   | NA | NA | 0.0087 | 3.00E-04 |
| NM_001105528 | CCDC178    | 0                  | 0.326215356656065 | 0.9996 | 2.00E-04 | NA | NA | 0.0013 | 0        |
| NM_001533    | HNRNPL     | 0                  | 0.326215356656065 | 1      | 2.00E-04 | NA | NA | 0.0013 | 0        |
| NM_152540    | SCFD2      | 0                  | 0.326215356656065 | 1      | 2.00E-04 | NA | NA | 0.0013 | 0        |
| NM_198285    | WDR86      | 0                  | 0.326215356656065 | 1      | 2.00E-04 | NA | NA | 0.0013 | 0        |
| NM_001284260 | WDR86      | 0                  | 0.326215356656065 | 1      | 2.00E-04 | NA | NA | 0.0013 | 0        |
| NM_001284261 | WDR86      | 0                  | 0.326215356656065 | 1      | 2.00E-04 | NA | NA | 0.0013 | 0        |
| NM_001284262 | WDR86      | 0                  | 0.326215356656065 | 1      | 2.00E-04 | NA | NA | 0.0013 | 0        |
| NM_018931    | PCDHB11    | 0                  | 0.326669695592912 | 0.932  | 0.0752   | NA | NA | 0.4511 | 0.0104   |
| NM_001135702 | YWHAZ      | 0                  | 0.326669695592912 | 1      | 2.00E-04 | NA | NA | 0.0013 | 0        |
| NR_038310    | MIR497HG   | 0                  | 0.327124034529759 | 1      | 2.00E-04 | NA | NA | 0.0013 | 0        |
| NR_024454    | NDUFB2-AS1 | 0                  | 0.327578373466606 | 1      | 2.00E-04 | NA | NA | 0.0013 | 0        |
| NM_001171155 | PET100     | 0                  | 0.328032712403453 | 1      | 2.00E-04 | NA | NA | 0.0013 | 0        |
| NR_033242    | PET100     | 0                  | 0.328032712403453 | 1      | 2.00E-04 | NA | NA | 0.0013 | 0        |
| NM_001253800 | ZNF331     | 0                  | 0.328032712403453 | 1      | 2.00E-04 | NA | NA | 0.0013 | 0        |
| NM_001256169 | APOM       | 0                  | 0.328032712403453 | 1      | 2.00E-04 | NA | NA | 0.0013 | 0        |
| NR_045828    | APOM       | 0                  | 0.328032712403453 | 1      | 2.00E-04 | NA | NA | 0.0013 | 0        |
| NM_001198943 | DTNA       | 0.0654248069059518 | 0.393457519309405 | 0.9988 | 8.00E-04 | NA | NA | 0.0045 | 1.00E-04 |
| NM_013372    | GREM1      | 0                  | 0.3284870513403   | 1      | 2.00E-04 | NA | NA | 0.0013 | 0        |
| NM_001191322 | GREM1      | 0                  | 0.3284870513403   | 1      | 2.00E-04 | NA | NA | 0.0013 | 0        |
| NM_001191323 | GREM1      | 0                  | 0.3284870513403   | 1      | 2.00E-04 | NA | NA | 0.0013 | 0        |
| NM_016173    | HEMK1      | 0                  | 0.3284870513403   | 1      | 2.00E-04 | NA | NA | 0.0013 | 0        |
| NM_033053    | DMRTC1     | 0                  | 0.3284870513403   | 1      | 2.00E-04 | NA | NA | 0.0013 | 0        |
| NM_001080851 | DMRTC1B    | 0                  | 0.3284870513403   | 1      | 2.00E-04 | NA | NA | 0.0013 | 0        |
| NM_001199214 | STMN2      | 0.12267151294866   | 0.451612903225806 | 1      | 2.00E-04 | NA | NA | 0.0013 | 0        |
| NM_007029    | STMN2      | 0.12267151294866   | 0.451612903225806 | 1      | 2.00E-04 | NA | NA | 0.0013 | 0        |
| NM_001020821 | MYADM      | 0                  | 0.328941390277147 | 1      | 4.00E-04 | NA | NA | 0.0029 | 1.00E-04 |
| NM_001020818 | MYADM      | 0                  | 0.328941390277147 | 1      | 2.00E-04 | NA | NA | 0.0013 | 0        |
| NM_005378    | MYCN       | 0                  | 0.328941390277147 | 1      | 2.00E-04 | NA | NA | 0.0013 | 0        |
| NM_001024629 | NRP1       | 0                  | 0.328941390277147 | 1      | 2.00E-04 | NA | NA | 0.0013 | 0        |
| NM_001244973 | NRP1       | 0                  | 0.328941390277147 | 1      | 2.00E-04 | NA | NA | 0.0013 | 0        |
| NM_003873    | NRP1       | 0                  | 0.328941390277147 | 1      | 2.00E-04 | NA | NA | 0.0013 | 0        |
| NR_045259    | NRP1       | 0                  | 0.328941390277147 | 1      | 4.00E-04 | NA | NA | 0.0029 | 1.00E-04 |
| NM_001024628 | NRP1       | 0                  | 0.328941390277147 | 1      | 2.00E-04 | NA | NA | 0.0013 | 0        |
| NM_001244972 | NRP1       | 0                  | 0.328941390277147 | 1      | 2.00E-04 | NA | NA | 0.0013 | 0        |
| NR_024420    | LINC00937  | 0                  | 0.328941390277147 | 1      | 2.00E-04 | NA | NA | 0.0013 | 0        |
| NM_013244    | MGAT4C     | 0                  | 0.328941390277147 | 1      | 2.00E-04 | NA | NA | 0.0013 | 0        |
| NM_001252275 | UGT2A1     | 0                  | 0.328941390277147 | 0.9966 | 0.0058   | NA | NA | 0.027  | 8.00E-04 |

|              |          |                    |                   |        |          |    |    |        |          |
|--------------|----------|--------------------|-------------------|--------|----------|----|----|--------|----------|
| NM_006798    | UGT2A1   | 0                  | 0.328941390277147 | 0.997  | 0.0038   | NA | NA | 0.0251 | 6.00E-04 |
| NM_001252274 | UGT2A1   | 0                  | 0.328941390277147 | 0.9956 | 0.0048   | NA | NA | 0.0251 | 7.00E-04 |
| NM_001142598 | P4HA2    | 0                  | 0.328941390277147 | 1      | 2.00E-04 | NA | NA | 0.0013 | 0        |
| NM_001142599 | P4HA2    | 0                  | 0.328941390277147 | 1      | 2.00E-04 | NA | NA | 0.0013 | 0        |
| NM_001017974 | P4HA2    | 0                  | 0.328941390277147 | 1      | 2.00E-04 | NA | NA | 0.0013 | 0        |
| NM_006187    | OAS3     | 0                  | 0.329395729213994 | 1      | 2.00E-04 | NA | NA | 0.0013 | 0        |
| NM_173088    | CAPN3    | 0                  | 0.329395729213994 | 1      | 2.00E-04 | NA | NA | 0.0013 | 0        |
| NM_001243438 | SPECC1   | 0                  | 0.329395729213994 | 1      | 2.00E-04 | NA | NA | 0.0013 | 0        |
| NM_001033555 | SPECC1   | 0                  | 0.329395729213994 | 1      | 2.00E-04 | NA | NA | 0.0013 | 0        |
| NM_001033554 | SPECC1   | 0                  | 0.329395729213994 | 1      | 2.00E-04 | NA | NA | 0.0013 | 0        |
| NM_006180    | NTRK2    | 0                  | 0.329395729213994 | 1      | 2.00E-04 | NA | NA | 0.0013 | 0        |
| NM_001018064 | NTRK2    | 0                  | 0.329395729213994 | 1      | 2.00E-04 | NA | NA | 0.0013 | 0        |
| NM_001271733 | MST1L    | 0                  | 0.329395729213994 | 1      | 2.00E-04 | NA | NA | 0.0013 | 0        |
| NM_001258418 | ARHGAP20 | 0                  | 0.329395729213994 | 1      | 2.00E-04 | NA | NA | 0.0013 | 0        |
| NM_001258416 | ARHGAP20 | 0                  | 0.329395729213994 | 1      | 2.00E-04 | NA | NA | 0.0013 | 0        |
| NM_006145    | DNAJB1   | 0                  | 0.329395729213994 | 1      | 2.00E-04 | NA | NA | 0.0013 | 0        |
| NM_006727    | CDH10    | 0                  | 0.329395729213994 | 1      | 2.00E-04 | NA | NA | 0.0013 | 0        |
| NM_207521    | RTN4     | 0.0131758291685597 | 0.3430258973194   | 1      | 2.00E-04 | NA | NA | 0.0013 | 0        |
| NM_005298    | GPR25    | 0                  | 0.329850068150841 | 1      | 2.00E-04 | NA | NA | 0.0013 | 0        |
| NM_152328    | ADSSL1   | 0                  | 0.329850068150841 | 1      | 2.00E-04 | NA | NA | 0.0013 | 0        |
| NM_001248    | ENTPD3   | 0                  | 0.329850068150841 | 1      | 2.00E-04 | NA | NA | 0.0013 | 0        |
| NM_001282556 | HHLA2    | 0                  | 0.329850068150841 | 1      | 2.00E-04 | NA | NA | 0.0013 | 0        |
| NM_001282558 | HHLA2    | 0                  | 0.329850068150841 | 1      | 2.00E-04 | NA | NA | 0.0013 | 0        |
| NM_001282559 | HHLA2    | 0                  | 0.329850068150841 | 1      | 2.00E-04 | NA | NA | 0.0013 | 0        |
| NM_205767    | C19orf70 | 0                  | 0.329850068150841 | 1      | 2.00E-04 | NA | NA | 0.0013 | 0        |
| NM_015265    | SATB2    | 0                  | 0.329850068150841 | 1      | 2.00E-04 | NA | NA | 0.0013 | 0        |
| NM_001105205 | RUSC1    | 0                  | 0.330304407087687 | 1      | 2.00E-04 | NA | NA | 0.0013 | 0        |
| NM_001278229 | RUSC1    | 0                  | 0.330304407087687 | 1      | 2.00E-04 | NA | NA | 0.0013 | 0        |
| NM_014328    | RUSC1    | 0                  | 0.330304407087687 | 1      | 2.00E-04 | NA | NA | 0.0013 | 0        |
| NM_001278227 | RUSC1    | 0                  | 0.330304407087687 | 1      | 2.00E-04 | NA | NA | 0.0013 | 0        |
| NM_001278228 | RUSC1    | 0                  | 0.330304407087687 | 1      | 2.00E-04 | NA | NA | 0.0013 | 0        |
| NM_053280    | ODF3     | 0                  | 0.330304407087687 | 1      | 2.00E-04 | NA | NA | 0.0013 | 0        |
| NM_145000    | RANBP3L  | 0                  | 0.330304407087687 | 1      | 2.00E-04 | NA | NA | 0.0013 | 0        |
| NM_001161429 | RANBP3L  | 0                  | 0.330304407087687 | 1      | 2.00E-04 | NA | NA | 0.0013 | 0        |
| NM_032687    | CYHR1    | 0                  | 0.330304407087687 | 1      | 2.00E-04 | NA | NA | 0.0013 | 0        |
| NM_001278170 | ZNF33A   | 0                  | 0.330758746024534 | 1      | 2.00E-04 | NA | NA | 0.0013 | 0        |
| NM_001278173 | ZNF33A   | 0                  | 0.330758746024534 | 1      | 2.00E-04 | NA | NA | 0.0013 | 0        |
| NM_001278174 | ZNF33A   | 0                  | 0.330758746024534 | 1      | 2.00E-04 | NA | NA | 0.0013 | 0        |
| NM_006974    | ZNF33A   | 0                  | 0.330758746024534 | 1      | 2.00E-04 | NA | NA | 0.0013 | 0        |
| NM_006954    | ZNF33A   | 0                  | 0.330758746024534 | 1      | 2.00E-04 | NA | NA | 0.0013 | 0        |
| NM_001278179 | ZNF33A   | 0                  | 0.330758746024534 | 1      | 2.00E-04 | NA | NA | 0.0013 | 0        |
| NM_001278176 | ZNF33A   | 0                  | 0.330758746024534 | 1      | 2.00E-04 | NA | NA | 0.0013 | 0        |
| NM_001278178 | ZNF33A   | 0                  | 0.330758746024534 | 1      | 2.00E-04 | NA | NA | 0.0013 | 0        |
| NM_001278177 | ZNF33A   | 0                  | 0.330758746024534 | 1      | 2.00E-04 | NA | NA | 0.0013 | 0        |

|              |             |                    |                   |        |          |    |    |        |          |
|--------------|-------------|--------------------|-------------------|--------|----------|----|----|--------|----------|
| NM_001278175 | ZNF33A      | 0                  | 0.330758746024534 | 1      | 2.00E-04 | NA | NA | 0.0013 | 0        |
| NM_001278171 | ZNF33A      | 0                  | 0.330758746024534 | 1      | 2.00E-04 | NA | NA | 0.0013 | 0        |
| NM_001114982 | TP63        | 0                  | 0.330758746024534 | 1      | 2.00E-04 | NA | NA | 0.0013 | 0        |
| NM_001114981 | TP63        | 0                  | 0.330758746024534 | 1      | 2.00E-04 | NA | NA | 0.0013 | 0        |
| NM_001114980 | TP63        | 0                  | 0.330758746024534 | 1      | 2.00E-04 | NA | NA | 0.0013 | 0        |
| NR_024348    | FBXL19-AS1  | 0                  | 0.330758746024534 | 1      | 2.00E-04 | NA | NA | 0.0013 | 0        |
| NR_073443    | HDAC2       | 0                  | 0.330758746024534 | 1      | 0.005    | NA | NA | 0.0251 | 7.00E-04 |
| NM_004416    | DTX1        | 0.10358927760109   | 0.434348023625625 | 0.9906 | 0.0098   | NA | NA | 0.0539 | 0.0014   |
| NM_016178    | OAZ3        | 0                  | 0.331213084961381 | 1      | 2.00E-04 | NA | NA | 0.0013 | 0        |
| NM_001134877 | C14orf80    | 0                  | 0.331213084961381 | 1      | 4.00E-04 | NA | NA | 0.0029 | 1.00E-04 |
| NR_024008    | WWC2-AS2    | 0                  | 0.331213084961381 | 1      | 2.00E-04 | NA | NA | 0.0013 | 0        |
| NM_005321    | HIST1H1E    | 0.0463425715583826 | 0.377555656519764 | 0.9196 | 0.0878   | NA | NA | 0.4511 | 0.0121   |
| NM_001243768 | APITD1-CORT | 0                  | 0.331667423898228 | 1      | 0.004    | NA | NA | 0.0251 | 6.00E-04 |
| NR_037187    | APITD1-CORT | 0                  | 0.331667423898228 | 1      | 0.0036   | NA | NA | 0.0173 | 5.00E-04 |
| NR_036462    | APITD1      | 0                  | 0.331667423898228 | 1      | 0.0038   | NA | NA | 0.0251 | 6.00E-04 |
| NM_004419    | DUSP5       | 0                  | 0.331667423898228 | 1      | 2.00E-04 | NA | NA | 0.0013 | 0        |
| NM_001657    | AREG        | 0                  | 0.331667423898228 | 1      | 6.00E-04 | NA | NA | 0.0039 | 1.00E-04 |
| NM_006469    | IVNS1ABP    | 0                  | 0.331667423898228 | 1      | 2.00E-04 | NA | NA | 0.0013 | 0        |
| NM_020921    | NIN         | 0                  | 0.331667423898228 | 1      | 2.00E-04 | NA | NA | 0.0013 | 0        |
| NM_182946    | NIN         | 0                  | 0.331667423898228 | 1      | 2.00E-04 | NA | NA | 0.0013 | 0        |
| NM_182944    | NIN         | 0                  | 0.331667423898228 | 1      | 2.00E-04 | NA | NA | 0.0013 | 0        |
| NM_016350    | NIN         | 0                  | 0.331667423898228 | 1      | 2.00E-04 | NA | NA | 0.0013 | 0        |
| NM_001199887 | IL7         | 0                  | 0.331667423898228 | 1      | 2.00E-04 | NA | NA | 0.0013 | 0        |
| NM_001199888 | IL7         | 0                  | 0.331667423898228 | 1      | 2.00E-04 | NA | NA | 0.0013 | 0        |
| NM_001199886 | IL7         | 0                  | 0.331667423898228 | 1      | 2.00E-04 | NA | NA | 0.0013 | 0        |
| NM_000880    | IL7         | 0                  | 0.331667423898228 | 1      | 2.00E-04 | NA | NA | 0.0013 | 0        |
| NM_001164783 | BCKDHA      | 0                  | 0.332121762835075 | 1      | 2.00E-04 | NA | NA | 0.0013 | 0        |
| NM_000709    | BCKDHA      | 0                  | 0.332121762835075 | 1      | 2.00E-04 | NA | NA | 0.0013 | 0        |
| NM_001134758 | ARFRP1      | 0                  | 0.332576101771922 | 1      | 2.00E-04 | NA | NA | 0.0013 | 0        |
| NM_003224    | ARFRP1      | 0                  | 0.332576101771922 | 1      | 2.00E-04 | NA | NA | 0.0013 | 0        |
| NR_051955    | ARFRP1      | 0                  | 0.332576101771922 | 1      | 2.00E-04 | NA | NA | 0.0013 | 0        |
| NR_051954    | ARFRP1      | 0                  | 0.332576101771922 | 1      | 2.00E-04 | NA | NA | 0.0013 | 0        |
| NM_001267546 | ARFRP1      | 0                  | 0.332576101771922 | 1      | 2.00E-04 | NA | NA | 0.0013 | 0        |
| NM_001267545 | ARFRP1      | 0                  | 0.332576101771922 | 1      | 2.00E-04 | NA | NA | 0.0013 | 0        |
| NM_001267544 | ARFRP1      | 0                  | 0.332576101771922 | 1      | 2.00E-04 | NA | NA | 0.0013 | 0        |
| NM_001267547 | ARFRP1      | 0                  | 0.332576101771922 | 1      | 2.00E-04 | NA | NA | 0.0013 | 0        |
| NR_051958    | ARFRP1      | 0                  | 0.332576101771922 | 1      | 2.00E-04 | NA | NA | 0.0013 | 0        |
| NM_001267549 | ARFRP1      | 0                  | 0.332576101771922 | 1      | 2.00E-04 | NA | NA | 0.0013 | 0        |
| NM_001267548 | ARFRP1      | 0                  | 0.332576101771922 | 1      | 2.00E-04 | NA | NA | 0.0013 | 0        |
| NR_051957    | ARFRP1      | 0                  | 0.332576101771922 | 1      | 2.00E-04 | NA | NA | 0.0013 | 0        |
| NR_051956    | ARFRP1      | 0                  | 0.332576101771922 | 1      | 2.00E-04 | NA | NA | 0.0013 | 0        |
| NM_024717    | MCTP1       | 0                  | 0.332576101771922 | 1      | 2.00E-04 | NA | NA | 0.0013 | 0        |
| NM_031442    | TMEM47      | 0                  | 0.332576101771922 | 1      | 2.00E-04 | NA | NA | 0.0013 | 0        |
| NM_213653    | HFE2        | 0                  | 0.333030440708769 | 1      | 2.00E-04 | NA | NA | 0.0013 | 0        |

|              |          |                    |                   |        |          |    |    |        |          |
|--------------|----------|--------------------|-------------------|--------|----------|----|----|--------|----------|
| NM_213652    | HFE2     | 0                  | 0.333030440708769 | 1      | 2.00E-04 | NA | NA | 0.0013 | 0        |
| NM_145277    | HFE2     | 0                  | 0.333030440708769 | 1      | 2.00E-04 | NA | NA | 0.0013 | 0        |
| NM_202004    | HFE2     | 0                  | 0.333030440708769 | 1      | 2.00E-04 | NA | NA | 0.0013 | 0        |
| NM_014212    | HOXC11   | 0                  | 0.333030440708769 | 1      | 2.00E-04 | NA | NA | 0.0013 | 0        |
| NM_001193621 | PINLYP   | 0                  | 0.333030440708769 | 1      | 2.00E-04 | NA | NA | 0.0013 | 0        |
| NM_021088    | ZNF2     | 0                  | 0.333030440708769 | 1      | 2.00E-04 | NA | NA | 0.0013 | 0        |
| NM_001017396 | ZNF2     | 0                  | 0.333030440708769 | 1      | 2.00E-04 | NA | NA | 0.0013 | 0        |
| NM_001282398 | ZNF2     | 0                  | 0.333030440708769 | 1      | 2.00E-04 | NA | NA | 0.0013 | 0        |
| NM_001099403 | PRDM8    | 0                  | 0.333030440708769 | 1      | 2.00E-04 | NA | NA | 0.0013 | 0        |
| NM_000426    | LAMA2    | 0                  | 0.333030440708769 | 1      | 2.00E-04 | NA | NA | 0.0013 | 0        |
| NM_001079823 | LAMA2    | 0                  | 0.333030440708769 | 1      | 2.00E-04 | NA | NA | 0.0013 | 0        |
| NM_001167822 | BLCAP    | 0                  | 0.333030440708769 | 1      | 2.00E-04 | NA | NA | 0.0013 | 0        |
| NM_001167821 | BLCAP    | 0                  | 0.333030440708769 | 1      | 2.00E-04 | NA | NA | 0.0013 | 0        |
| NM_019003    | SPIN2A   | 0                  | 0.333030440708769 | 1      | 2.00E-04 | NA | NA | 0.0013 | 0        |
| NM_017655    | GIPC2    | 0                  | 0.333484779645616 | 1      | 2.00E-04 | NA | NA | 0.0013 | 0        |
| NM_001206917 | CACNB3   | 0                  | 0.333484779645616 | 1      | 2.00E-04 | NA | NA | 0.0013 | 0        |
| NR_038458    | TOB1-AS1 | 0                  | 0.333939118582463 | 0.9834 | 0.0136   | NA | NA | 0.0652 | 0.0019   |
| NM_001145158 | HBS1L    | 0                  | 0.333939118582463 | 1      | 2.00E-04 | NA | NA | 0.0013 | 0        |
| NM_006620    | HBS1L    | 0                  | 0.333939118582463 | 1      | 2.00E-04 | NA | NA | 0.0013 | 0        |
| NM_001145207 | HBS1L    | 0                  | 0.333939118582463 | 1      | 2.00E-04 | NA | NA | 0.0013 | 0        |
| NM_014980    | STXBPSL  | 0                  | 0.334393457519309 | 1      | 2.00E-04 | NA | NA | 0.0013 | 0        |
| NM_001243645 | CFL2     | 0                  | 0.334393457519309 | 1      | 2.00E-04 | NA | NA | 0.0013 | 0        |
| NM_001144060 | NHSL1    | 0.0704225352112676 | 0.404815992730577 | 1      | 2.00E-04 | NA | NA | 0.0013 | 0        |
| NM_001145258 | IRAK4    | 0                  | 0.334847796456156 | 1      | 2.00E-04 | NA | NA | 0.0013 | 0        |
| NM_001145256 | IRAK4    | 0                  | 0.334847796456156 | 1      | 2.00E-04 | NA | NA | 0.0013 | 0        |
| NM_016123    | IRAK4    | 0                  | 0.334847796456156 | 1      | 2.00E-04 | NA | NA | 0.0013 | 0        |
| NM_001145257 | IRAK4    | 0                  | 0.334847796456156 | 1      | 2.00E-04 | NA | NA | 0.0013 | 0        |
| NM_001114182 | IRAK4    | 0                  | 0.334847796456156 | 1      | 2.00E-04 | NA | NA | 0.0013 | 0        |
| NM_181353    | ID1      | 0                  | 0.334847796456156 | 1      | 2.00E-04 | NA | NA | 0.0013 | 0        |
| NM_002165    | ID1      | 0                  | 0.334847796456156 | 1      | 2.00E-04 | NA | NA | 0.0013 | 0        |
| NM_001171906 | NUDT16   | 0                  | 0.334847796456156 | 1      | 2.00E-04 | NA | NA | 0.0013 | 0        |
| NM_152395    | NUDT16   | 0                  | 0.334847796456156 | 1      | 2.00E-04 | NA | NA | 0.0013 | 0        |
| NM_012347    | FBXO9    | 0                  | 0.334847796456156 | 1      | 2.00E-04 | NA | NA | 0.0013 | 0        |
| NM_001143997 | OGDHL    | 0                  | 0.334847796456156 | 1      | 2.00E-04 | NA | NA | 0.0013 | 0        |
| NM_001143996 | OGDHL    | 0                  | 0.334847796456156 | 1      | 2.00E-04 | NA | NA | 0.0013 | 0        |
| NM_018245    | OGDHL    | 0                  | 0.334847796456156 | 1      | 2.00E-04 | NA | NA | 0.0013 | 0        |
| NM_014898    | ZFP30    | 0                  | 0.334847796456156 | 1      | 0.0034   | NA | NA | 0.0173 | 5.00E-04 |
| NM_004893    | H2AFY    | 0                  | 0.334847796456156 | 1      | 2.00E-04 | NA | NA | 0.0013 | 0        |
| NM_006352    | ZBTB18   | 0.110404361653794  | 0.445706497046797 | 1      | 2.00E-04 | NA | NA | 0.0013 | 0        |
| NR_046356    | GRIA4    | 0                  | 0.335302135393003 | 1      | 2.00E-04 | NA | NA | 0.0013 | 0        |
| NM_001112812 | GRIA4    | 0                  | 0.335302135393003 | 1      | 2.00E-04 | NA | NA | 0.0013 | 0        |
| NM_001198784 | C15orf65 | 0                  | 0.335302135393003 | 1      | 2.00E-04 | NA | NA | 0.0013 | 0        |
| NM_015050    | CMTR1    | 0                  | 0.335302135393003 | 1      | 2.00E-04 | NA | NA | 0.0013 | 0        |
| NR_002935    | FABP5P3  | 0                  | 0.335302135393003 | 1      | 0.0034   | NA | NA | 0.0173 | 5.00E-04 |

|              |          |                    |                   |   |          |    |    |        |          |
|--------------|----------|--------------------|-------------------|---|----------|----|----|--------|----------|
| NM_001145346 | RBMXL3   | 0                  | 0.335302135393003 | 1 | 2.00E-04 | NA | NA | 0.0013 | 0        |
| NM_001256617 | TUBGCP2  | 0                  | 0.335302135393003 | 1 | 2.00E-04 | NA | NA | 0.0013 | 0        |
| NM_001256618 | TUBGCP2  | 0                  | 0.335302135393003 | 1 | 2.00E-04 | NA | NA | 0.0013 | 0        |
| NM_006659    | TUBGCP2  | 0                  | 0.335302135393003 | 1 | 2.00E-04 | NA | NA | 0.0013 | 0        |
| NR_034159    | FLJ30403 | 0                  | 0.335302135393003 | 1 | 2.00E-04 | NA | NA | 0.0013 | 0        |
| NM_144586    | LYPD1    | 0                  | 0.33575647432985  | 1 | 2.00E-04 | NA | NA | 0.0013 | 0        |
| NM_001017372 | SLC27A6  | 0                  | 0.336210813266697 | 1 | 2.00E-04 | NA | NA | 0.0013 | 0        |
| NM_014031    | SLC27A6  | 0                  | 0.336210813266697 | 1 | 2.00E-04 | NA | NA | 0.0013 | 0        |
| NM_003728    | UNC5C    | 0                  | 0.336210813266697 | 1 | 2.00E-04 | NA | NA | 0.0013 | 0        |
| NM_005993    | TBCD     | 0                  | 0.336665152203544 | 1 | 2.00E-04 | NA | NA | 0.0013 | 0        |
| NM_001202550 | WDR27    | 0                  | 0.336665152203544 | 1 | 2.00E-04 | NA | NA | 0.0013 | 0        |
| NM_182552    | WDR27    | 0                  | 0.336665152203544 | 1 | 2.00E-04 | NA | NA | 0.0013 | 0        |
| NM_004297    | GNA14    | 0                  | 0.336665152203544 | 1 | 2.00E-04 | NA | NA | 0.0013 | 0        |
| NM_016481    | C9orf156 | 0.0449795547478419 | 0.381644706951386 | 1 | 2.00E-04 | NA | NA | 0.0013 | 0        |
| NM_014044    | UNC50    | 0                  | 0.337119491140391 | 1 | 2.00E-04 | NA | NA | 0.0013 | 0        |
| NM_001002009 | NT5C3A   | 0                  | 0.337119491140391 | 1 | 2.00E-04 | NA | NA | 0.0013 | 0        |
| NM_001002010 | NT5C3A   | 0                  | 0.337119491140391 | 1 | 2.00E-04 | NA | NA | 0.0013 | 0        |
| NM_012199    | AGO1     | 0                  | 0.337573830077238 | 1 | 2.00E-04 | NA | NA | 0.0013 | 0        |
| NM_001004055 | LRRC29   | 0                  | 0.337573830077238 | 1 | 2.00E-04 | NA | NA | 0.0013 | 0        |
| NM_012163    | LRRC29   | 0                  | 0.337573830077238 | 1 | 2.00E-04 | NA | NA | 0.0013 | 0        |
| NM_007146    | VEZF1    | 0                  | 0.337573830077238 | 1 | 2.00E-04 | NA | NA | 0.0013 | 0        |
| NM_001098625 | JKAMP    | 0                  | 0.338028169014085 | 1 | 2.00E-04 | NA | NA | 0.0013 | 0        |
| NM_001284201 | JKAMP    | 0                  | 0.338028169014085 | 1 | 2.00E-04 | NA | NA | 0.0013 | 0        |
| NM_001284202 | JKAMP    | 0                  | 0.338028169014085 | 1 | 2.00E-04 | NA | NA | 0.0013 | 0        |
| NM_001284203 | JKAMP    | 0                  | 0.338028169014085 | 1 | 2.00E-04 | NA | NA | 0.0013 | 0        |
| NM_001284204 | JKAMP    | 0                  | 0.338028169014085 | 1 | 2.00E-04 | NA | NA | 0.0013 | 0        |
| NM_016475    | JKAMP    | 0                  | 0.338028169014085 | 1 | 2.00E-04 | NA | NA | 0.0013 | 0        |
| NM_004317    | ASNA1    | 0                  | 0.338028169014085 | 1 | 2.00E-04 | NA | NA | 0.0013 | 0        |
| NM_001174100 | PCBP4    | 0                  | 0.338028169014085 | 1 | 2.00E-04 | NA | NA | 0.0013 | 0        |
| NM_033008    | PCBP4    | 0                  | 0.338028169014085 | 1 | 2.00E-04 | NA | NA | 0.0013 | 0        |
| NM_017911    | FAM118A  | 0                  | 0.338482507950931 | 1 | 2.00E-04 | NA | NA | 0.0013 | 0        |
| NM_030960    | SPACA1   | 0                  | 0.338482507950931 | 1 | 4.00E-04 | NA | NA | 0.0029 | 1.00E-04 |
| NM_022129    | PBLD     | 0                  | 0.338482507950931 | 1 | 2.00E-04 | NA | NA | 0.0013 | 0        |
| NM_001033083 | PBLD     | 0                  | 0.338482507950931 | 1 | 2.00E-04 | NA | NA | 0.0013 | 0        |
| NM_138734    | NRXN2    | 0                  | 0.338482507950931 | 1 | 2.00E-04 | NA | NA | 0.0013 | 0        |
| NM_001113402 | AMN1     | 0                  | 0.338482507950931 | 1 | 2.00E-04 | NA | NA | 0.0013 | 0        |
| NR_103522    | AMN1     | 0                  | 0.338482507950931 | 1 | 2.00E-04 | NA | NA | 0.0013 | 0        |
| NM_001278411 | AMN1     | 0                  | 0.338482507950931 | 1 | 2.00E-04 | NA | NA | 0.0013 | 0        |
| NM_001278412 | AMN1     | 0                  | 0.338482507950931 | 1 | 2.00E-04 | NA | NA | 0.0013 | 0        |
| NR_103523    | AMN1     | 0                  | 0.338482507950931 | 1 | 2.00E-04 | NA | NA | 0.0013 | 0        |
| NM_181865    | ACOT7    | 0                  | 0.338936846887778 | 1 | 2.00E-04 | NA | NA | 0.0013 | 0        |
| NM_001009931 | HRNR     | 0                  | 0.338936846887778 | 1 | 2.00E-04 | NA | NA | 0.0013 | 0        |
| NM_025140    | CCDC92   | 0                  | 0.338936846887778 | 1 | 2.00E-04 | NA | NA | 0.0013 | 0        |
| NM_021966    | TCL1A    | 0                  | 0.338936846887778 | 1 | 2.00E-04 | NA | NA | 0.0013 | 0        |

|              |              |                    |                   |        |          |    |    |        |          |
|--------------|--------------|--------------------|-------------------|--------|----------|----|----|--------|----------|
| NM_001098725 | TCL1A        | 0                  | 0.338936846887778 | 1      | 2.00E-04 | NA | NA | 0.0013 | 0        |
| NR_049726    | TCL1A        | 0                  | 0.338936846887778 | 1      | 2.00E-04 | NA | NA | 0.0013 | 0        |
| NM_001202439 | NCR3LG1      | 0                  | 0.339391185824625 | 1      | 2.00E-04 | NA | NA | 0.0013 | 0        |
| NM_003516    | HIST2H2AA3   | 0                  | 0.339391185824625 | 1      | 2.00E-04 | NA | NA | 0.0013 | 0        |
| NM_001040874 | HIST2H2AA4   | 0                  | 0.339391185824625 | 1      | 2.00E-04 | NA | NA | 0.0013 | 0        |
| NM_001085430 | C17orf67     | 0                  | 0.339391185824625 | 1      | 2.00E-04 | NA | NA | 0.0013 | 0        |
| NM_170712    | RASSF1       | 0                  | 0.339391185824625 | 1      | 2.00E-04 | NA | NA | 0.0013 | 0        |
| NM_006230    | POLD2        | 0                  | 0.339391185824625 | 1      | 2.00E-04 | NA | NA | 0.0013 | 0        |
| NM_001127218 | POLD2        | 0                  | 0.339391185824625 | 1      | 2.00E-04 | NA | NA | 0.0013 | 0        |
| NR_002918    | SNORA48      | 0.0245343025897319 | 0.363925488414357 | 0.9404 | 0.0642   | NA | NA | 0.4511 | 0.0089   |
| NM_001136215 | ARTN         | 0                  | 0.339845524761472 | 1      | 2.00E-04 | NA | NA | 0.0013 | 0        |
| NM_057091    | ARTN         | 0                  | 0.339845524761472 | 1      | 2.00E-04 | NA | NA | 0.0013 | 0        |
| NM_057090    | ARTN         | 0                  | 0.339845524761472 | 1      | 2.00E-04 | NA | NA | 0.0013 | 0        |
| NM_182724    | CREM         | 0                  | 0.339845524761472 | 0.9998 | 2.00E-04 | NA | NA | 0.0013 | 0        |
| NR_051971    | CREM         | 0                  | 0.339845524761472 | 1      | 4.00E-04 | NA | NA | 0.0029 | 1.00E-04 |
| NM_182723    | CREM         | 0                  | 0.339845524761472 | 0.9998 | 2.00E-04 | NA | NA | 0.0013 | 0        |
| NM_182721    | CREM         | 0                  | 0.339845524761472 | 1      | 2.00E-04 | NA | NA | 0.0013 | 0        |
| NM_001267570 | CREM         | 0                  | 0.339845524761472 | 1      | 2.00E-04 | NA | NA | 0.0013 | 0        |
| NR_051972    | CREM         | 0                  | 0.339845524761472 | 1      | 2.00E-04 | NA | NA | 0.0013 | 0        |
| NM_012223    | MYO1B        | 0                  | 0.339845524761472 | 1      | 2.00E-04 | NA | NA | 0.0013 | 0        |
| NM_001130158 | MYO1B        | 0                  | 0.339845524761472 | 1      | 2.00E-04 | NA | NA | 0.0013 | 0        |
| NM_015577    | RAI14        | 0                  | 0.339845524761472 | 1      | 2.00E-04 | NA | NA | 0.0013 | 0        |
| NM_001145522 | RAI14        | 0                  | 0.339845524761472 | 1      | 2.00E-04 | NA | NA | 0.0013 | 0        |
| NM_001037332 | CYFIP2       | 0                  | 0.339845524761472 | 1      | 2.00E-04 | NA | NA | 0.0013 | 0        |
| NM_016551    | TM7SF3       | 0                  | 0.339845524761472 | 1      | 2.00E-04 | NA | NA | 0.0013 | 0        |
| NM_001199099 | BAIAP3       | 0                  | 0.340299863698319 | 1      | 2.00E-04 | NA | NA | 0.0013 | 0        |
| NM_001199098 | BAIAP3       | 0                  | 0.340299863698319 | 1      | 2.00E-04 | NA | NA | 0.0013 | 0        |
| NM_001199097 | BAIAP3       | 0                  | 0.340299863698319 | 1      | 2.00E-04 | NA | NA | 0.0013 | 0        |
| NM_007350    | PHLDA1       | 0                  | 0.340299863698319 | 1      | 2.00E-04 | NA | NA | 0.0013 | 0        |
| NM_004951    | GPR183       | 0                  | 0.340299863698319 | 1      | 2.00E-04 | NA | NA | 0.0013 | 0        |
| NM_001025    | RPS23        | 0                  | 0.340299863698319 | 1      | 2.00E-04 | NA | NA | 0.0013 | 0        |
| NM_032936    | TMEM60       | 0                  | 0.340754202635166 | 1      | 0.0012   | NA | NA | 0.0087 | 2.00E-04 |
| NM_019111    | HLA-DRA      | 0                  | 0.341208541572013 | 1      | 2.00E-04 | NA | NA | 0.0013 | 0        |
| NM_000553    | WRN          | 0                  | 0.341208541572013 | 1      | 2.00E-04 | NA | NA | 0.0013 | 0        |
| NM_182836    | RABGGTA      | 0                  | 0.341208541572013 | 1      | 2.00E-04 | NA | NA | 0.0013 | 0        |
| NM_004581    | RABGGTA      | 0                  | 0.341208541572013 | 1      | 2.00E-04 | NA | NA | 0.0013 | 0        |
| NM_182920    | ADAMTS9      | 0                  | 0.341208541572013 | 1      | 2.00E-04 | NA | NA | 0.0013 | 0        |
| NM_015139    | SLC35D1      | 0                  | 0.34166288050886  | 1      | 2.00E-04 | NA | NA | 0.0013 | 0        |
| NM_017664    | ANKRD10      | 0                  | 0.34166288050886  | 1      | 2.00E-04 | NA | NA | 0.0013 | 0        |
| NR_038396    | LOC100506469 | 0                  | 0.34166288050886  | 1      | 2.00E-04 | NA | NA | 0.0013 | 0        |
| NR_073144    | LOC101054525 | 0                  | 0.342117219445706 | 1      | 2.00E-04 | NA | NA | 0.0013 | 0        |
| NM_138281    | DLX4         | 0                  | 0.342117219445706 | 1      | 2.00E-04 | NA | NA | 0.0013 | 0        |
| NM_001282805 | MARCH7       | 0                  | 0.342117219445706 | 1      | 2.00E-04 | NA | NA | 0.0013 | 0        |
| NM_001282806 | MARCH7       | 0                  | 0.342117219445706 | 1      | 2.00E-04 | NA | NA | 0.0013 | 0        |

|              |         |                    |                   |        |          |    |    |        |          |
|--------------|---------|--------------------|-------------------|--------|----------|----|----|--------|----------|
| NM_022826    | MARCH7  | 0                  | 0.342117219445706 | 1      | 2.00E-04 | NA | NA | 0.0013 | 0        |
| NR_033268    | NUDT16  | 0                  | 0.342117219445706 | 1      | 2.00E-04 | NA | NA | 0.0013 | 0        |
| NM_001127645 | GABRA1  | 0                  | 0.342117219445706 | 1      | 2.00E-04 | NA | NA | 0.0013 | 0        |
| NM_057096    | CYP3A43 | 0                  | 0.342117219445706 | 1      | 2.00E-04 | NA | NA | 0.0013 | 0        |
| NR_103869    | CYP3A43 | 0                  | 0.342117219445706 | 1      | 2.00E-04 | NA | NA | 0.0013 | 0        |
| NM_022820    | CYP3A43 | 0                  | 0.342117219445706 | 1      | 2.00E-04 | NA | NA | 0.0013 | 0        |
| NM_001278921 | CYP3A43 | 0                  | 0.342117219445706 | 1      | 2.00E-04 | NA | NA | 0.0013 | 0        |
| NR_103868    | CYP3A43 | 0                  | 0.342117219445706 | 1      | 2.00E-04 | NA | NA | 0.0013 | 0        |
| NM_057095    | CYP3A43 | 0                  | 0.342117219445706 | 1      | 2.00E-04 | NA | NA | 0.0013 | 0        |
| NM_003290    | TPM4    | 0                  | 0.342571558382553 | 1      | 2.00E-04 | NA | NA | 0.0013 | 0        |
| NM_014463    | LSM3    | 0                  | 0.342571558382553 | 1      | 2.00E-04 | NA | NA | 0.0013 | 0        |
| NM_001136543 | LYSMD1  | 0                  | 0.342571558382553 | 1      | 2.00E-04 | NA | NA | 0.0013 | 0        |
| NM_001039771 | CBLN3   | 0                  | 0.342571558382553 | 1      | 2.00E-04 | NA | NA | 0.0013 | 0        |
| NM_033657    | DAP3    | 0                  | 0.3430258973194   | 1      | 2.00E-04 | NA | NA | 0.0013 | 0        |
| NM_004632    | DAP3    | 0                  | 0.3430258973194   | 1      | 2.00E-04 | NA | NA | 0.0013 | 0        |
| NM_001199851 | DAP3    | 0                  | 0.3430258973194   | 1      | 2.00E-04 | NA | NA | 0.0013 | 0        |
| NM_001199850 | DAP3    | 0                  | 0.3430258973194   | 1      | 2.00E-04 | NA | NA | 0.0013 | 0        |
| NM_001199849 | DAP3    | 0                  | 0.3430258973194   | 1      | 2.00E-04 | NA | NA | 0.0013 | 0        |
| NM_003299    | HSP90B1 | 0                  | 0.3430258973194   | 1      | 2.00E-04 | NA | NA | 0.0013 | 0        |
| NM_001040665 | STEAP2  | 0                  | 0.3430258973194   | 0.9996 | 2.00E-04 | NA | NA | 0.0013 | 0        |
| NM_001244946 | STEAP2  | 0                  | 0.3430258973194   | 0.9996 | 6.00E-04 | NA | NA | 0.0039 | 1.00E-04 |
| NM_207520    | RTN4    | 0                  | 0.3430258973194   | 1      | 2.00E-04 | NA | NA | 0.0013 | 0        |
| NM_020532    | RTN4    | 0                  | 0.3430258973194   | 1      | 2.00E-04 | NA | NA | 0.0013 | 0        |
| NM_153828    | RTN4    | 0                  | 0.3430258973194   | 1      | 2.00E-04 | NA | NA | 0.0013 | 0        |
| NM_001005479 | OR5H6   | 0                  | 0.343480236256247 | 1      | 2.00E-04 | NA | NA | 0.0013 | 0        |
| NM_006309    | LRRFIP2 | 0                  | 0.343480236256247 | 1      | 2.00E-04 | NA | NA | 0.0013 | 0        |
| NM_016121    | KCTD3   | 0                  | 0.343934575193094 | 1      | 2.00E-04 | NA | NA | 0.0013 | 0        |
| NM_021176    | G6PC2   | 0                  | 0.343934575193094 | 1      | 2.00E-04 | NA | NA | 0.0013 | 0        |
| NM_001081686 | G6PC2   | 0                  | 0.343934575193094 | 1      | 2.00E-04 | NA | NA | 0.0013 | 0        |
| NM_004974    | KCNA2   | 0                  | 0.343934575193094 | 1      | 2.00E-04 | NA | NA | 0.0013 | 0        |
| NM_144693    | ZNF558  | 0                  | 0.343934575193094 | 1      | 2.00E-04 | NA | NA | 0.0013 | 0        |
| NR_030753    | MIR615  | 0                  | 0.344388914129941 | 1      | 2.00E-04 | NA | NA | 0.0013 | 0        |
| NM_001130845 | BCL6    | 0                  | 0.344388914129941 | 1      | 2.00E-04 | NA | NA | 0.0013 | 0        |
| NM_014789    | ZNF623  | 0.0277146751476602 | 0.372557928214448 | 1      | 2.00E-04 | NA | NA | 0.0013 | 0        |
| NR_036437    | KCNC4   | 0                  | 0.344843253066788 | 1      | 2.00E-04 | NA | NA | 0.0013 | 0        |
| NM_001039574 | KCNC4   | 0                  | 0.344843253066788 | 1      | 2.00E-04 | NA | NA | 0.0013 | 0        |
| NM_004978    | KCNC4   | 0                  | 0.344843253066788 | 1      | 2.00E-04 | NA | NA | 0.0013 | 0        |
| NM_016333    | SRRM2   | 0                  | 0.344843253066788 | 0.9986 | 0.0028   | NA | NA | 0.0173 | 4.00E-04 |
| NM_006775    | QKI     | 0                  | 0.344843253066788 | 1      | 2.00E-04 | NA | NA | 0.0013 | 0        |
| NM_206853    | QKI     | 0                  | 0.344843253066788 | 1      | 2.00E-04 | NA | NA | 0.0013 | 0        |
| NM_206855    | QKI     | 0                  | 0.344843253066788 | 1      | 2.00E-04 | NA | NA | 0.0013 | 0        |
| NM_206854    | QKI     | 0                  | 0.344843253066788 | 1      | 2.00E-04 | NA | NA | 0.0013 | 0        |
| NM_018201    | TBC1D13 | 0                  | 0.344843253066788 | 1      | 2.00E-04 | NA | NA | 0.0013 | 0        |
| NM_001170553 | VSIG1   | 0                  | 0.344843253066788 | 1      | 2.00E-04 | NA | NA | 0.0013 | 0        |

|              |           |                    |                   |        |          |    |    |        |          |
|--------------|-----------|--------------------|-------------------|--------|----------|----|----|--------|----------|
| NM_182607    | VSIG1     | 0                  | 0.344843253066788 | 1      | 2.00E-04 | NA | NA | 0.0013 | 0        |
| NM_001144919 | FGFR2     | 0                  | 0.344843253066788 | 1      | 2.00E-04 | NA | NA | 0.0013 | 0        |
| NM_000141    | FGFR2     | 0                  | 0.344843253066788 | 1      | 2.00E-04 | NA | NA | 0.0013 | 0        |
| NM_022970    | FGFR2     | 0                  | 0.344843253066788 | 1      | 2.00E-04 | NA | NA | 0.0013 | 0        |
| NM_001144918 | FGFR2     | 0                  | 0.344843253066788 | 1      | 2.00E-04 | NA | NA | 0.0013 | 0        |
| NM_001144917 | FGFR2     | 0                  | 0.344843253066788 | 1      | 2.00E-04 | NA | NA | 0.0013 | 0        |
| NR_073009    | FGFR2     | 0                  | 0.344843253066788 | 1      | 2.00E-04 | NA | NA | 0.0013 | 0        |
| NM_000785    | CYP27B1   | 0                  | 0.344843253066788 | 1      | 2.00E-04 | NA | NA | 0.0013 | 0        |
| NM_000764    | CYP2A7    | 0                  | 0.344843253066788 | 1      | 2.00E-04 | NA | NA | 0.0013 | 0        |
| NM_030589    | CYP2A7    | 0                  | 0.344843253066788 | 1      | 2.00E-04 | NA | NA | 0.0013 | 0        |
| NM_001283056 | C14orf105 | 0.0613357564743299 | 0.406179009541118 | 1      | 2.00E-04 | NA | NA | 0.0013 | 0        |
| NM_001283057 | C14orf105 | 0.0613357564743299 | 0.406179009541118 | 1      | 2.00E-04 | NA | NA | 0.0013 | 0        |
| NM_001283058 | C14orf105 | 0.0613357564743299 | 0.406179009541118 | 1      | 2.00E-04 | NA | NA | 0.0013 | 0        |
| NM_001283059 | C14orf105 | 0.0613357564743299 | 0.406179009541118 | 1      | 2.00E-04 | NA | NA | 0.0013 | 0        |
| NM_018168    | C14orf105 | 0.0613357564743299 | 0.406179009541118 | 1      | 2.00E-04 | NA | NA | 0.0013 | 0        |
| NM_001283060 | C14orf105 | 0.0613357564743299 | 0.406179009541118 | 1      | 2.00E-04 | NA | NA | 0.0013 | 0        |
| NM_004975    | KCNB1     | 0                  | 0.345297592003635 | 1      | 2.00E-04 | NA | NA | 0.0013 | 0        |
| NM_018147    | FAIM      | 0                  | 0.345751930940482 | 1      | 6.00E-04 | NA | NA | 0.0039 | 1.00E-04 |
| NM_003689    | AKR7A2    | 0                  | 0.345751930940482 | 1      | 2.00E-04 | NA | NA | 0.0013 | 0        |
| NM_001796    | CDH8      | 0                  | 0.345751930940482 | 1      | 2.00E-04 | NA | NA | 0.0013 | 0        |
| NR_003928    | CHIAP2    | 0                  | 0.346206269877328 | 0.9996 | 2.00E-04 | NA | NA | 0.0013 | 0        |
| NM_001025076 | CELF2     | 0                  | 0.346206269877328 | 1      | 2.00E-04 | NA | NA | 0.0013 | 0        |
| NM_001083591 | CELF2     | 0                  | 0.346206269877328 | 1      | 2.00E-04 | NA | NA | 0.0013 | 0        |
| NM_057157    | CYP26A1   | 0                  | 0.346206269877328 | 1      | 2.00E-04 | NA | NA | 0.0013 | 0        |
| NM_001166276 | ARHGAP25  | 0                  | 0.346660608814175 | 1      | 2.00E-04 | NA | NA | 0.0013 | 0        |
| NM_014882    | ARHGAP25  | 0                  | 0.346660608814175 | 1      | 2.00E-04 | NA | NA | 0.0013 | 0        |
| NM_006937    | SUMO2     | 0                  | 0.346660608814175 | 1      | 2.00E-04 | NA | NA | 0.0013 | 0        |
| NM_001005849 | SUMO2     | 0                  | 0.346660608814175 | 1      | 2.00E-04 | NA | NA | 0.0013 | 0        |
| NM_001282531 | ADNP      | 0                  | 0.346660608814175 | 1      | 2.00E-04 | NA | NA | 0.0013 | 0        |
| NM_015339    | ADNP      | 0                  | 0.346660608814175 | 1      | 2.00E-04 | NA | NA | 0.0013 | 0        |
| NM_181442    | ADNP      | 0                  | 0.346660608814175 | 1      | 2.00E-04 | NA | NA | 0.0013 | 0        |
| NR_023920    | WT1-AS    | 0                  | 0.347114947751022 | 1      | 2.00E-04 | NA | NA | 0.0013 | 0        |
| NM_212557    | AMTN      | 0                  | 0.347114947751022 | 1      | 2.00E-04 | NA | NA | 0.0013 | 0        |
| NR_103460    | TPM3      | 0                  | 0.347114947751022 | 1      | 2.00E-04 | NA | NA | 0.0013 | 0        |
| NM_152263    | TPM3      | 0                  | 0.347114947751022 | 1      | 2.00E-04 | NA | NA | 0.0013 | 0        |
| NM_058192    | RPUSD1    | 0                  | 0.347114947751022 | 1      | 2.00E-04 | NA | NA | 0.0013 | 0        |
| NM_002470    | MYH3      | 0                  | 0.347114947751022 | 1      | 2.00E-04 | NA | NA | 0.0013 | 0        |
| NM_000367    | TPMT      | 0                  | 0.347114947751022 | 1      | 2.00E-04 | NA | NA | 0.0013 | 0        |
| NM_001080508 | TBX18     | 0                  | 0.347114947751022 | 1      | 2.00E-04 | NA | NA | 0.0013 | 0        |
| NM_000728    | CALCB     | 0                  | 0.347569286687869 | 1      | 2.00E-04 | NA | NA | 0.0013 | 0        |
| NM_022134    | GAL3ST2   | 0                  | 0.347569286687869 | 1      | 2.00E-04 | NA | NA | 0.0013 | 0        |
| NM_001184975 | PACSIN3   | 0                  | 0.347569286687869 | 1      | 2.00E-04 | NA | NA | 0.0013 | 0        |
| NM_001184974 | PACSIN3   | 0                  | 0.347569286687869 | 1      | 2.00E-04 | NA | NA | 0.0013 | 0        |
| NM_016223    | PACSIN3   | 0                  | 0.347569286687869 | 1      | 2.00E-04 | NA | NA | 0.0013 | 0        |



|              |           |                     |                   |   |          |    |    |        |   |
|--------------|-----------|---------------------|-------------------|---|----------|----|----|--------|---|
| NM_002115    | HK3       | 0                   | 0.347569286687869 | 1 | 2.00E-04 | NA | NA | 0.0013 | 0 |
| NM_001113411 | FGGY      | 0                   | 0.348023625624716 | 1 | 2.00E-04 | NA | NA | 0.0013 | 0 |
| NM_018291    | FGGY      | 0                   | 0.348023625624716 | 1 | 2.00E-04 | NA | NA | 0.0013 | 0 |
| NR_103473    | FGGY      | 0                   | 0.348023625624716 | 1 | 2.00E-04 | NA | NA | 0.0013 | 0 |
| NM_017824    | MARCH5    | 0                   | 0.348023625624716 | 1 | 2.00E-04 | NA | NA | 0.0013 | 0 |
| NM_003301    | TRHR      | 0                   | 0.348023625624716 | 1 | 2.00E-04 | NA | NA | 0.0013 | 0 |
| NM_001007097 | NTRK2     | 0                   | 0.348023625624716 | 1 | 2.00E-04 | NA | NA | 0.0013 | 0 |
| NM_001135553 | MKNK1     | 0                   | 0.348023625624716 | 1 | 2.00E-04 | NA | NA | 0.0013 | 0 |
| NM_003684    | MKNK1     | 0                   | 0.348023625624716 | 1 | 2.00E-04 | NA | NA | 0.0013 | 0 |
| NM_198973    | MKNK1     | 0                   | 0.348023625624716 | 1 | 2.00E-04 | NA | NA | 0.0013 | 0 |
| NR_024174    | MKNK1     | 0                   | 0.348023625624716 | 1 | 2.00E-04 | NA | NA | 0.0013 | 0 |
| NR_024176    | MKNK1     | 0                   | 0.348023625624716 | 1 | 2.00E-04 | NA | NA | 0.0013 | 0 |
| NR_030724    | XPNPEP1   | 0                   | 0.348023625624716 | 1 | 2.00E-04 | NA | NA | 0.0013 | 0 |
| NM_020383    | XPNPEP1   | 0                   | 0.348023625624716 | 1 | 2.00E-04 | NA | NA | 0.0013 | 0 |
| NM_001167604 | XPNPEP1   | 0                   | 0.348023625624716 | 1 | 2.00E-04 | NA | NA | 0.0013 | 0 |
| NM_001256749 | SSUH2     | 0                   | 0.348023625624716 | 1 | 2.00E-04 | NA | NA | 0.0013 | 0 |
| NM_015931    | SSUH2     | 0                   | 0.348023625624716 | 1 | 2.00E-04 | NA | NA | 0.0013 | 0 |
| NM_001171743 | C3orf18   | 0                   | 0.348477964561563 | 1 | 2.00E-04 | NA | NA | 0.0013 | 0 |
| NM_001171740 | C3orf18   | 0                   | 0.348477964561563 | 1 | 2.00E-04 | NA | NA | 0.0013 | 0 |
| NM_016210    | C3orf18   | 0                   | 0.348477964561563 | 1 | 2.00E-04 | NA | NA | 0.0013 | 0 |
| NR_026769    | PPBPP2    | 0                   | 0.348477964561563 | 1 | 2.00E-04 | NA | NA | 0.0013 | 0 |
| NR_046229    | GMDS-AS1  | 0                   | 0.34893230349841  | 1 | 2.00E-04 | NA | NA | 0.0013 | 0 |
| NR_047662    | LOC729732 | 0                   | 0.34893230349841  | 1 | 2.00E-04 | NA | NA | 0.0013 | 0 |
| NM_001206559 | POLR1D    | 0                   | 0.349386642435257 | 1 | 2.00E-04 | NA | NA | 0.0013 | 0 |
| NM_002667    | PLN       | 0                   | 0.349386642435257 | 1 | 2.00E-04 | NA | NA | 0.0013 | 0 |
| NM_013448    | BAZ1A     | 0                   | 0.349386642435257 | 1 | 2.00E-04 | NA | NA | 0.0013 | 0 |
| NM_182648    | BAZ1A     | 0                   | 0.349386642435257 | 1 | 2.00E-04 | NA | NA | 0.0013 | 0 |
| NM_001251829 | SPP1      | 0.00636074511585643 | 0.35620172648796  | 1 | 2.00E-04 | NA | NA | 0.0013 | 0 |
| NM_000582    | SPP1      | 0.00636074511585643 | 0.35620172648796  | 1 | 2.00E-04 | NA | NA | 0.0013 | 0 |
| NM_001040060 | SPP1      | 0.00636074511585643 | 0.35620172648796  | 1 | 2.00E-04 | NA | NA | 0.0013 | 0 |
| NM_001040058 | SPP1      | 0.00636074511585643 | 0.35620172648796  | 1 | 2.00E-04 | NA | NA | 0.0013 | 0 |
| NM_001251830 | SPP1      | 0.00636074511585643 | 0.35620172648796  | 1 | 2.00E-04 | NA | NA | 0.0013 | 0 |
| NM_002596    | CDK18     | 0                   | 0.349840981372104 | 1 | 2.00E-04 | NA | NA | 0.0013 | 0 |
| NM_212503    | CDK18     | 0                   | 0.349840981372104 | 1 | 2.00E-04 | NA | NA | 0.0013 | 0 |
| NM_212502    | CDK18     | 0                   | 0.349840981372104 | 1 | 2.00E-04 | NA | NA | 0.0013 | 0 |
| NM_005954    | MT3       | 0                   | 0.349840981372104 | 1 | 2.00E-04 | NA | NA | 0.0013 | 0 |
| NM_001035505 | BOLA3     | 0                   | 0.349840981372104 | 1 | 2.00E-04 | NA | NA | 0.0013 | 0 |
| NM_212552    | BOLA3     | 0                   | 0.349840981372104 | 1 | 2.00E-04 | NA | NA | 0.0013 | 0 |
| NM_053013    | ENO3      | 0                   | 0.35029532030895  | 1 | 2.00E-04 | NA | NA | 0.0013 | 0 |
| NM_001193503 | ENO3      | 0                   | 0.35029532030895  | 1 | 2.00E-04 | NA | NA | 0.0013 | 0 |
| NM_001976    | ENO3      | 0                   | 0.35029532030895  | 1 | 2.00E-04 | NA | NA | 0.0013 | 0 |
| NM_001079907 | ZNF331    | 0                   | 0.35029532030895  | 1 | 2.00E-04 | NA | NA | 0.0013 | 0 |
| NM_133342    | RAD17     | 0                   | 0.35029532030895  | 1 | 2.00E-04 | NA | NA | 0.0013 | 0 |
| NM_001143773 | FAM13C    | 0                   | 0.35029532030895  | 1 | 2.00E-04 | NA | NA | 0.0013 | 0 |

|              |              |                   |                   |        |          |    |    |        |          |
|--------------|--------------|-------------------|-------------------|--------|----------|----|----|--------|----------|
| NM_015399    | BRMS1        | 0                 | 0.35029532030895  | 1      | 2.00E-04 | NA | NA | 0.0013 | 0        |
| NM_001024957 | BRMS1        | 0                 | 0.35029532030895  | 1      | 2.00E-04 | NA | NA | 0.0013 | 0        |
| NM_002250    | KCNN4        | 0                 | 0.35029532030895  | 1      | 2.00E-04 | NA | NA | 0.0013 | 0        |
| NM_001135254 | PAX7         | 0                 | 0.350749659245797 | 1      | 2.00E-04 | NA | NA | 0.0013 | 0        |
| NM_002584    | PAX7         | 0                 | 0.350749659245797 | 1      | 2.00E-04 | NA | NA | 0.0013 | 0        |
| NM_013945    | PAX7         | 0                 | 0.350749659245797 | 1      | 2.00E-04 | NA | NA | 0.0013 | 0        |
| NM_006090    | CEPT1        | 0                 | 0.350749659245797 | 1      | 2.00E-04 | NA | NA | 0.0013 | 0        |
| NM_173483    | CYP4F22      | 0                 | 0.350749659245797 | 1      | 2.00E-04 | NA | NA | 0.0013 | 0        |
| NM_001267617 | ARPP21       | 0                 | 0.350749659245797 | 1      | 2.00E-04 | NA | NA | 0.0013 | 0        |
| NM_001099668 | HIGD1A       | 0                 | 0.350749659245797 | 1      | 2.00E-04 | NA | NA | 0.0013 | 0        |
| NR_002973    | SNORA40      | 0.101771921853703 | 0.4525215810995   | 0.9988 | 0.0016   | NA | NA | 0.0087 | 2.00E-04 |
| NM_000028    | AGL          | 0                 | 0.351203998182644 | 1      | 2.00E-04 | NA | NA | 0.0013 | 0        |
| NM_000643    | AGL          | 0                 | 0.351203998182644 | 1      | 2.00E-04 | NA | NA | 0.0013 | 0        |
| NM_000644    | AGL          | 0                 | 0.351203998182644 | 1      | 2.00E-04 | NA | NA | 0.0013 | 0        |
| NM_018518    | MCM10        | 0                 | 0.351203998182644 | 1      | 2.00E-04 | NA | NA | 0.0013 | 0        |
| NM_182751    | MCM10        | 0                 | 0.351203998182644 | 1      | 2.00E-04 | NA | NA | 0.0013 | 0        |
| NM_080687    | UPF3A        | 0                 | 0.351203998182644 | 1      | 2.00E-04 | NA | NA | 0.0013 | 0        |
| NM_023011    | UPF3A        | 0                 | 0.351203998182644 | 1      | 2.00E-04 | NA | NA | 0.0013 | 0        |
| NM_000633    | BCL2         | 0                 | 0.351203998182644 | 1      | 2.00E-04 | NA | NA | 0.0013 | 0        |
| NM_000657    | BCL2         | 0                 | 0.351203998182644 | 1      | 2.00E-04 | NA | NA | 0.0013 | 0        |
| NM_018958    | NPAP1        | 0                 | 0.351658337119491 | 1      | 2.00E-04 | NA | NA | 0.0013 | 0        |
| NM_021005    | NR2F2        | 0                 | 0.351658337119491 | 1      | 2.00E-04 | NA | NA | 0.0013 | 0        |
| NM_017742    | ZCCHC2       | 0                 | 0.351658337119491 | 1      | 2.00E-04 | NA | NA | 0.0013 | 0        |
| NM_004779    | CNOT8        | 0                 | 0.351658337119491 | 1      | 6.00E-04 | NA | NA | 0.0039 | 1.00E-04 |
| NM_005060    | RORC         | 0                 | 0.351658337119491 | 1      | 2.00E-04 | NA | NA | 0.0013 | 0        |
| NR_002439    | SNORD43      | 0                 | 0.351658337119491 | 1      | 2.00E-04 | NA | NA | 0.0013 | 0        |
| NM_178175    | LHFPL1       | 0                 | 0.351658337119491 | 1      | 2.00E-04 | NA | NA | 0.0013 | 0        |
| NM_001759    | CCND2        | 0                 | 0.352112676056338 | 1      | 2.00E-04 | NA | NA | 0.0013 | 0        |
| NM_001040666 | STEAP2       | 0                 | 0.352112676056338 | 1      | 2.00E-04 | NA | NA | 0.0013 | 0        |
| NM_052936    | ATG4A        | 0                 | 0.352112676056338 | 1      | 2.00E-04 | NA | NA | 0.0013 | 0        |
| NM_178270    | ATG4A        | 0                 | 0.352112676056338 | 1      | 2.00E-04 | NA | NA | 0.0013 | 0        |
| NM_006185    | NUMA1        | 0                 | 0.352112676056338 | 1      | 2.00E-04 | NA | NA | 0.0013 | 0        |
| NM_015137    | EFR3A        | 0                 | 0.352567014993185 | 1      | 2.00E-04 | NA | NA | 0.0013 | 0        |
| NM_181449    | CD300E       | 0                 | 0.352567014993185 | 1      | 2.00E-04 | NA | NA | 0.0013 | 0        |
| NM_181842    | ZBTB12       | 0                 | 0.352567014993185 | 1      | 2.00E-04 | NA | NA | 0.0013 | 0        |
| NR_034015    | LOC100131060 | 0                 | 0.353021353930032 | 1      | 2.00E-04 | NA | NA | 0.0013 | 0        |
| NR_034014    | LOC100131060 | 0                 | 0.353021353930032 | 1      | 2.00E-04 | NA | NA | 0.0013 | 0        |
| NR_102429    | OSGEPL1-AS1  | 0                 | 0.353021353930032 | 1      | 2.00E-04 | NA | NA | 0.0013 | 0        |
| NM_005301    | GPR35        | 0                 | 0.353021353930032 | 1      | 2.00E-04 | NA | NA | 0.0013 | 0        |
| NM_006722    | MITF         | 0                 | 0.353021353930032 | 1      | 2.00E-04 | NA | NA | 0.0013 | 0        |
| NM_004282    | BAG2         | 0                 | 0.353021353930032 | 1      | 2.00E-04 | NA | NA | 0.0013 | 0        |
| NM_007218    | RNF139       | 0                 | 0.353021353930032 | 1      | 2.00E-04 | NA | NA | 0.0013 | 0        |
| NM_003482    | KMT2D        | 0                 | 0.353021353930032 | 1      | 2.00E-04 | NA | NA | 0.0013 | 0        |
| NM_014804    | KIAA0753     | 0                 | 0.353021353930032 | 1      | 2.00E-04 | NA | NA | 0.0013 | 0        |

|              |          |   |                   |        |          |    |    |        |        |
|--------------|----------|---|-------------------|--------|----------|----|----|--------|--------|
| NM_001172509 | SATB2    | 0 | 0.353021353930032 | 1      | 2.00E-04 | NA | NA | 0.0013 | 0      |
| NM_004004    | GJB2     | 0 | 0.353475692866879 | 1      | 2.00E-04 | NA | NA | 0.0013 | 0      |
| NM_002958    | RYK      | 0 | 0.353475692866879 | 1      | 2.00E-04 | NA | NA | 0.0013 | 0      |
| NM_001005861 | RYK      | 0 | 0.353475692866879 | 1      | 2.00E-04 | NA | NA | 0.0013 | 0      |
| NM_173663    | FAM153A  | 0 | 0.353475692866879 | 1      | 2.00E-04 | NA | NA | 0.0013 | 0      |
| NM_024676    | SH3D21   | 0 | 0.353930031803726 | 1      | 2.00E-04 | NA | NA | 0.0013 | 0      |
| NM_001270952 | UCHL3    | 0 | 0.353930031803726 | 1      | 2.00E-04 | NA | NA | 0.0013 | 0      |
| NM_015461    | ZNF521   | 0 | 0.353930031803726 | 1      | 2.00E-04 | NA | NA | 0.0013 | 0      |
| NM_001143762 | EIF5A    | 0 | 0.354384370740572 | 0.937  | 0.0628   | NA | NA | 0.4511 | 0.0087 |
| NM_006633    | IQGAP2   | 0 | 0.354384370740572 | 1      | 2.00E-04 | NA | NA | 0.0013 | 0      |
| NM_198267    | ING3     | 0 | 0.354384370740572 | 1      | 2.00E-04 | NA | NA | 0.0013 | 0      |
| NM_019071    | ING3     | 0 | 0.354384370740572 | 1      | 2.00E-04 | NA | NA | 0.0013 | 0      |
| NM_015527    | TBC1D10B | 0 | 0.354384370740572 | 1      | 2.00E-04 | NA | NA | 0.0013 | 0      |
| NM_016553    | NUP62    | 0 | 0.354384370740572 | 1      | 2.00E-04 | NA | NA | 0.0013 | 0      |
| NM_178349    | LCE1B    | 0 | 0.354838709677419 | 1      | 2.00E-04 | NA | NA | 0.0013 | 0      |
| NM_002795    | PSMB3    | 0 | 0.354838709677419 | 1      | 2.00E-04 | NA | NA | 0.0013 | 0      |
| NR_104194    | PSMB3    | 0 | 0.354838709677419 | 1      | 2.00E-04 | NA | NA | 0.0013 | 0      |
| NR_104195    | PSMB3    | 0 | 0.354838709677419 | 1      | 2.00E-04 | NA | NA | 0.0013 | 0      |
| NM_015263    | DMXL2    | 0 | 0.354838709677419 | 0.9896 | 0.0134   | NA | NA | 0.0652 | 0.0019 |
| NM_001174116 | DMXL2    | 0 | 0.354838709677419 | 0.9872 | 0.0102   | NA | NA | 0.0539 | 0.0015 |
| NM_001174117 | DMXL2    | 0 | 0.354838709677419 | 0.9876 | 0.01     | NA | NA | 0.0539 | 0.0014 |
| NM_024689    | CXorf36  | 0 | 0.354838709677419 | 1      | 2.00E-04 | NA | NA | 0.0013 | 0      |
| NM_176819    | CXorf36  | 0 | 0.354838709677419 | 1      | 2.00E-04 | NA | NA | 0.0013 | 0      |
| NM_004950    | EPYC     | 0 | 0.355293048614266 | 1      | 2.00E-04 | NA | NA | 0.0013 | 0      |
| NM_080742    | B3GAT2   | 0 | 0.355293048614266 | 1      | 2.00E-04 | NA | NA | 0.0013 | 0      |
| NM_001282116 | RFX3     | 0 | 0.355293048614266 | 1      | 2.00E-04 | NA | NA | 0.0013 | 0      |
| NM_134428    | RFX3     | 0 | 0.355293048614266 | 1      | 2.00E-04 | NA | NA | 0.0013 | 0      |
| NM_203425    | C17orf82 | 0 | 0.355747387551113 | 1      | 2.00E-04 | NA | NA | 0.0013 | 0      |
| NM_001200029 | HYAL3    | 0 | 0.355747387551113 | 1      | 2.00E-04 | NA | NA | 0.0013 | 0      |
| NM_206966    | CSorf46  | 0 | 0.355747387551113 | 1      | 2.00E-04 | NA | NA | 0.0013 | 0      |
| NM_002735    | PRKAR1B  | 0 | 0.35620172648796  | 1      | 2.00E-04 | NA | NA | 0.0013 | 0      |
| NM_001164762 | PRKAR1B  | 0 | 0.35620172648796  | 1      | 2.00E-04 | NA | NA | 0.0013 | 0      |
| NM_007374    | SIX6     | 0 | 0.356656065424807 | 1      | 2.00E-04 | NA | NA | 0.0013 | 0      |
| NM_018455    | CENPN    | 0 | 0.356656065424807 | 1      | 2.00E-04 | NA | NA | 0.0013 | 0      |
| NM_001270473 | CENPN    | 0 | 0.356656065424807 | 1      | 2.00E-04 | NA | NA | 0.0013 | 0      |
| NM_001100624 | CENPN    | 0 | 0.356656065424807 | 1      | 2.00E-04 | NA | NA | 0.0013 | 0      |
| NM_001100625 | CENPN    | 0 | 0.356656065424807 | 1      | 2.00E-04 | NA | NA | 0.0013 | 0      |
| NM_001270474 | CENPN    | 0 | 0.356656065424807 | 1      | 2.00E-04 | NA | NA | 0.0013 | 0      |
| NM_001199054 | CDIP1    | 0 | 0.356656065424807 | 1      | 2.00E-04 | NA | NA | 0.0013 | 0      |
| NM_012472    | LRRC6    | 0 | 0.356656065424807 | 1      | 2.00E-04 | NA | NA | 0.0013 | 0      |
| NR_073525    | LRRC6    | 0 | 0.356656065424807 | 1      | 2.00E-04 | NA | NA | 0.0013 | 0      |
| NM_004308    | ARHGAP1  | 0 | 0.357110404361654 | 1      | 2.00E-04 | NA | NA | 0.0013 | 0      |
| NM_033266    | ERN2     | 0 | 0.357110404361654 | 1      | 2.00E-04 | NA | NA | 0.0013 | 0      |
| NM_001280    | CIRBP    | 0 | 0.357564743298501 | 1      | 2.00E-04 | NA | NA | 0.0013 | 0      |

|              |              |                     |                   |        |          |    |    |        |          |
|--------------|--------------|---------------------|-------------------|--------|----------|----|----|--------|----------|
| NR_023313    | CIRBP        | 0                   | 0.357564743298501 | 1      | 2.00E-04 | NA | NA | 0.0013 | 0        |
| NR_023312    | CIRBP        | 0                   | 0.357564743298501 | 1      | 2.00E-04 | NA | NA | 0.0013 | 0        |
| NM_005574    | LMO2         | 0                   | 0.357564743298501 | 1      | 2.00E-04 | NA | NA | 0.0013 | 0        |
| NM_052818    | N4BP2L1      | 0                   | 0.357564743298501 | 1      | 2.00E-04 | NA | NA | 0.0013 | 0        |
| NM_001079691 | N4BP2L1      | 0                   | 0.357564743298501 | 1      | 2.00E-04 | NA | NA | 0.0013 | 0        |
| NR_027053    | LOC646214    | 0                   | 0.357564743298501 | 1      | 2.00E-04 | NA | NA | 0.0013 | 0        |
| NM_001042698 | ZSWIM7       | 0                   | 0.357564743298501 | 1      | 2.00E-04 | NA | NA | 0.0013 | 0        |
| NM_001042697 | ZSWIM7       | 0                   | 0.357564743298501 | 1      | 2.00E-04 | NA | NA | 0.0013 | 0        |
| NM_198867    | ALKBH6       | 0                   | 0.357564743298501 | 1      | 2.00E-04 | NA | NA | 0.0013 | 0        |
| NM_032878    | ALKBH6       | 0                   | 0.357564743298501 | 1      | 2.00E-04 | NA | NA | 0.0013 | 0        |
| NM_001001888 | VCX3B        | 0                   | 0.358019082235348 | 1      | 2.00E-04 | NA | NA | 0.0013 | 0        |
| NM_001145413 | NFE2L2       | 0                   | 0.358019082235348 | 0.9708 | 0.032    | NA | NA | 0.3764 | 0.0045   |
| NM_001145412 | NFE2L2       | 0                   | 0.358019082235348 | 0.9662 | 0.0368   | NA | NA | 0.3764 | 0.0052   |
| NM_032520    | GNPTG        | 0                   | 0.358473421172194 | 1      | 2.00E-04 | NA | NA | 0.0013 | 0        |
| NM_003609    | HIRIP3       | 0                   | 0.358473421172194 | 1      | 2.00E-04 | NA | NA | 0.0013 | 0        |
| NM_001197323 | HIRIP3       | 0                   | 0.358473421172194 | 1      | 2.00E-04 | NA | NA | 0.0013 | 0        |
| NM_013450    | BAZ2B        | 0                   | 0.358473421172194 | 1      | 2.00E-04 | NA | NA | 0.0013 | 0        |
| NM_002432    | MNDA         | 0                   | 0.358927760109041 | 1      | 2.00E-04 | NA | NA | 0.0013 | 0        |
| NM_016395    | PTPLAD1      | 0                   | 0.358927760109041 | 1      | 2.00E-04 | NA | NA | 0.0013 | 0        |
| NM_006437    | PARP4        | 0                   | 0.358927760109041 | 1      | 2.00E-04 | NA | NA | 0.0013 | 0        |
| NR_037939    | HOXA10       | 0                   | 0.358927760109041 | 1      | 2.00E-04 | NA | NA | 0.0013 | 0        |
| NR_037940    | HOXA10-HOXA9 | 0                   | 0.358927760109041 | 1      | 2.00E-04 | NA | NA | 0.0013 | 0        |
| NR_033192    | CCDC59       | 0.0935938209904589  | 0.4525215810995   | 1      | 0.0012   | NA | NA | 0.0087 | 2.00E-04 |
| NM_020873    | LRRN1        | 0                   | 0.359836437982735 | 1      | 2.00E-04 | NA | NA | 0.0013 | 0        |
| NM_015892    | CHST15       | 0                   | 0.359836437982735 | 1      | 2.00E-04 | NA | NA | 0.0013 | 0        |
| NM_014863    | CHST15       | 0                   | 0.359836437982735 | 1      | 2.00E-04 | NA | NA | 0.0013 | 0        |
| NM_198494    | ZFP69        | 0                   | 0.360290776919582 | 1      | 2.00E-04 | NA | NA | 0.0013 | 0        |
| NM_004279    | PMPCB        | 0                   | 0.360290776919582 | 1      | 2.00E-04 | NA | NA | 0.0013 | 0        |
| NM_001252226 | PLK2         | 0                   | 0.360290776919582 | 1      | 2.00E-04 | NA | NA | 0.0013 | 0        |
| NM_006622    | PLK2         | 0                   | 0.360290776919582 | 1      | 2.00E-04 | NA | NA | 0.0013 | 0        |
| NM_001508    | GPR39        | 0.00772376192639709 | 0.368468877782826 | 1      | 2.00E-04 | NA | NA | 0.0013 | 0        |
| NM_003198    | TCEB3        | 0                   | 0.360745115856429 | 1      | 2.00E-04 | NA | NA | 0.0013 | 0        |
| NM_006200    | PCSK5        | 0                   | 0.360745115856429 | 1      | 2.00E-04 | NA | NA | 0.0013 | 0        |
| NM_001190482 | PCSK5        | 0                   | 0.360745115856429 | 1      | 2.00E-04 | NA | NA | 0.0013 | 0        |
| NM_012346    | NUP62        | 0                   | 0.360745115856429 | 1      | 2.00E-04 | NA | NA | 0.0013 | 0        |
| NM_153719    | NUP62        | 0                   | 0.360745115856429 | 1      | 2.00E-04 | NA | NA | 0.0013 | 0        |
| NM_001193357 | NUP62        | 0                   | 0.360745115856429 | 1      | 2.00E-04 | NA | NA | 0.0013 | 0        |
| NM_172374    | IL4I1        | 0                   | 0.360745115856429 | 1      | 2.00E-04 | NA | NA | 0.0013 | 0        |
| NM_001258018 | IL4I1        | 0                   | 0.360745115856429 | 1      | 2.00E-04 | NA | NA | 0.0013 | 0        |
| NM_001258017 | IL4I1        | 0                   | 0.360745115856429 | 1      | 2.00E-04 | NA | NA | 0.0013 | 0        |
| NM_153718    | NUP62        | 0                   | 0.360745115856429 | 1      | 2.00E-04 | NA | NA | 0.0013 | 0        |
| NR_047577    | IL4I1        | 0                   | 0.360745115856429 | 1      | 2.00E-04 | NA | NA | 0.0013 | 0        |
| NM_013423    | ARHGAP6      | 0                   | 0.360745115856429 | 1      | 2.00E-04 | NA | NA | 0.0013 | 0        |
| NM_005251    | FOXC2        | 0.0504316219900045  | 0.41163107678328  | 0.9968 | 0.0026   | NA | NA | 0.0173 | 4.00E-04 |

|              |              |                    |                   |   |          |    |    |        |          |
|--------------|--------------|--------------------|-------------------|---|----------|----|----|--------|----------|
| NM_001159596 | BIVM         | 0                  | 0.361199454793276 | 1 | 2.00E-04 | NA | NA | 0.0013 | 0        |
| NM_017693    | BIVM         | 0                  | 0.361199454793276 | 1 | 2.00E-04 | NA | NA | 0.0013 | 0        |
| NR_038227    | RASSF8-AS1   | 0                  | 0.361199454793276 | 1 | 2.00E-04 | NA | NA | 0.0013 | 0        |
| NM_006224    | PITPNA       | 0                  | 0.361199454793276 | 1 | 2.00E-04 | NA | NA | 0.0013 | 0        |
| NM_198393    | TEX14        | 0.115402089959109  | 0.477055883689232 | 1 | 2.00E-04 | NA | NA | 0.0013 | 0        |
| NM_001201457 | TEX14        | 0.115402089959109  | 0.477055883689232 | 1 | 2.00E-04 | NA | NA | 0.0013 | 0        |
| NM_031272    | TEX14        | 0.115402089959109  | 0.477055883689232 | 1 | 2.00E-04 | NA | NA | 0.0013 | 0        |
| NM_205768    | ZBTB18       | 0                  | 0.36210813266697  | 1 | 2.00E-04 | NA | NA | 0.0013 | 0        |
| NM_001018065 | NTRK2        | 0                  | 0.36210813266697  | 1 | 2.00E-04 | NA | NA | 0.0013 | 0        |
| NM_001018066 | NTRK2        | 0                  | 0.36210813266697  | 1 | 2.00E-04 | NA | NA | 0.0013 | 0        |
| NM_203474    | PORCN        | 0                  | 0.36210813266697  | 1 | 2.00E-04 | NA | NA | 0.0013 | 0        |
| NM_007051    | FAF1         | 0                  | 0.36210813266697  | 1 | 2.00E-04 | NA | NA | 0.0013 | 0        |
| NM_001271162 | PGR          | 0                  | 0.36210813266697  | 1 | 2.00E-04 | NA | NA | 0.0013 | 0        |
| NR_038942    | LOC100630918 | 0                  | 0.36210813266697  | 1 | 2.00E-04 | NA | NA | 0.0013 | 0        |
| NR_031688    | MIR5482      | 0                  | 0.36210813266697  | 1 | 2.00E-04 | NA | NA | 0.0013 | 0        |
| NM_016613    | FAM198B      | 0                  | 0.36210813266697  | 1 | 2.00E-04 | NA | NA | 0.0013 | 0        |
| NM_001134709 | DEK          | 0                  | 0.36210813266697  | 1 | 2.00E-04 | NA | NA | 0.0013 | 0        |
| NM_003472    | DEK          | 0                  | 0.36210813266697  | 1 | 2.00E-04 | NA | NA | 0.0013 | 0        |
| NM_001098638 | RNF169       | 0                  | 0.362562471603816 | 1 | 2.00E-04 | NA | NA | 0.0013 | 0        |
| NM_001005240 | OR4F17       | 0                  | 0.362562471603816 | 1 | 2.00E-04 | NA | NA | 0.0013 | 0        |
| NM_021927    | GUF1         | 0                  | 0.362562471603816 | 1 | 0.0038   | NA | NA | 0.0251 | 6.00E-04 |
| NM_175921    | C5orf51      | 0                  | 0.362562471603816 | 1 | 2.00E-04 | NA | NA | 0.0013 | 0        |
| NM_007278    | GABARAP      | 0                  | 0.362562471603816 | 1 | 2.00E-04 | NA | NA | 0.0013 | 0        |
| NM_001042475 | CEP85L       | 0                  | 0.362562471603816 | 1 | 2.00E-04 | NA | NA | 0.0013 | 0        |
| NM_206921    | CEP85L       | 0                  | 0.362562471603816 | 1 | 2.00E-04 | NA | NA | 0.0013 | 0        |
| NM_004586    | RPS6KA3      | 0                  | 0.362562471603816 | 1 | 2.00E-04 | NA | NA | 0.0013 | 0        |
| NM_000402    | G6PD         | 0                  | 0.362562471603816 | 1 | 2.00E-04 | NA | NA | 0.0013 | 0        |
| NM_001042351 | G6PD         | 0                  | 0.362562471603816 | 1 | 2.00E-04 | NA | NA | 0.0013 | 0        |
| NM_004580    | RAB27A       | 0.127669241253975  | 0.490231712857792 | 1 | 2.00E-04 | NA | NA | 0.0013 | 0        |
| NM_144587    | BTBD16       | 0                  | 0.363016810540663 | 1 | 2.00E-04 | NA | NA | 0.0013 | 0        |
| NM_014239    | EIF2B2       | 0                  | 0.363016810540663 | 1 | 0.012    | NA | NA | 0.0652 | 0.0017   |
| NR_026835    | FLJ37201     | 0                  | 0.363016810540663 | 1 | 2.00E-04 | NA | NA | 0.0013 | 0        |
| NM_002662    | PLD1         | 0                  | 0.363016810540663 | 1 | 4.00E-04 | NA | NA | 0.0029 | 1.00E-04 |
| NM_001130081 | PLD1         | 0                  | 0.363016810540663 | 1 | 4.00E-04 | NA | NA | 0.0029 | 1.00E-04 |
| NM_152594    | SPRED1       | 0                  | 0.36347114947751  | 1 | 2.00E-04 | NA | NA | 0.0013 | 0        |
| NM_138571    | HINT3        | 0                  | 0.36347114947751  | 1 | 2.00E-04 | NA | NA | 0.0013 | 0        |
| NM_001199381 | RNF145       | 0                  | 0.36347114947751  | 1 | 2.00E-04 | NA | NA | 0.0013 | 0        |
| NM_020702    | KIAA1161     | 0                  | 0.36347114947751  | 1 | 2.00E-04 | NA | NA | 0.0013 | 0        |
| NM_001165136 | HERC6        | 0.0499772830531577 | 0.413448432530668 | 1 | 2.00E-04 | NA | NA | 0.0013 | 0        |
| NM_017912    | HERC6        | 0.0499772830531577 | 0.413448432530668 | 1 | 2.00E-04 | NA | NA | 0.0013 | 0        |
| NM_001256879 | POLD2        | 0                  | 0.363925488414357 | 1 | 2.00E-04 | NA | NA | 0.0013 | 0        |
| NM_014872    | ZBTB5        | 0                  | 0.363925488414357 | 1 | 2.00E-04 | NA | NA | 0.0013 | 0        |
| NM_016378    | VCX2         | 0                  | 0.363925488414357 | 1 | 2.00E-04 | NA | NA | 0.0013 | 0        |
| NM_004982    | KCNJ8        | 0                  | 0.364379827351204 | 1 | 2.00E-04 | NA | NA | 0.0013 | 0        |

|              |             |                    |                   |       |          |    |    |        |          |
|--------------|-------------|--------------------|-------------------|-------|----------|----|----|--------|----------|
| NM_001136262 | ATXN7L3B    | 0                  | 0.364834166288051 | 1     | 2.00E-04 | NA | NA | 0.0013 | 0        |
| NM_001146256 | ZDHHHC15    | 0                  | 0.364834166288051 | 1     | 2.00E-04 | NA | NA | 0.0013 | 0        |
| NM_144969    | ZDHHHC15    | 0                  | 0.364834166288051 | 1     | 2.00E-04 | NA | NA | 0.0013 | 0        |
| NM_001146257 | ZDHHHC15    | 0                  | 0.364834166288051 | 1     | 2.00E-04 | NA | NA | 0.0013 | 0        |
| NM_001163423 | ZNF580      | 0                  | 0.365288505224898 | 1     | 2.00E-04 | NA | NA | 0.0013 | 0        |
| NR_034147    | APCDD1L-AS1 | 0                  | 0.365288505224898 | 1     | 2.00E-04 | NA | NA | 0.0013 | 0        |
| NR_001282    | PCDHB19P    | 0                  | 0.365288505224898 | 0.997 | 0.0042   | NA | NA | 0.0251 | 6.00E-04 |
| NM_032016    | STAR3NL     | 0                  | 0.365288505224898 | 1     | 2.00E-04 | NA | NA | 0.0013 | 0        |
| NM_032138    | KBTBD7      | 0                  | 0.365288505224898 | 1     | 2.00E-04 | NA | NA | 0.0013 | 0        |
| NM_001282855 | IQUB        | 0                  | 0.365288505224898 | 1     | 2.00E-04 | NA | NA | 0.0013 | 0        |
| NR_104244    | IQUB        | 0                  | 0.365288505224898 | 1     | 2.00E-04 | NA | NA | 0.0013 | 0        |
| NM_001170755 | NBPF15      | 0                  | 0.365742844161745 | 1     | 2.00E-04 | NA | NA | 0.0013 | 0        |
| NM_005257    | GATA6       | 0                  | 0.365742844161745 | 1     | 2.00E-04 | NA | NA | 0.0013 | 0        |
| NM_001174130 | SLC11A2     | 0                  | 0.366197183098592 | 1     | 2.00E-04 | NA | NA | 0.0013 | 0        |
| NM_001107    | ACYP1       | 0                  | 0.366197183098592 | 1     | 2.00E-04 | NA | NA | 0.0013 | 0        |
| NM_203488    | ACYP1       | 0                  | 0.366197183098592 | 1     | 2.00E-04 | NA | NA | 0.0013 | 0        |
| NM_001080397 | SLC45A1     | 0                  | 0.366651522035438 | 1     | 2.00E-04 | NA | NA | 0.0013 | 0        |
| NM_005704    | PTPRU       | 0                  | 0.366651522035438 | 1     | 2.00E-04 | NA | NA | 0.0013 | 0        |
| NM_001195001 | PTPRU       | 0                  | 0.366651522035438 | 1     | 2.00E-04 | NA | NA | 0.0013 | 0        |
| NM_133177    | PTPRU       | 0                  | 0.366651522035438 | 1     | 2.00E-04 | NA | NA | 0.0013 | 0        |
| NM_133178    | PTPRU       | 0                  | 0.366651522035438 | 1     | 2.00E-04 | NA | NA | 0.0013 | 0        |
| NM_001258039 | SPRY1       | 0                  | 0.366651522035438 | 1     | 2.00E-04 | NA | NA | 0.0013 | 0        |
| NM_015101    | COLGALT2    | 0                  | 0.366651522035438 | 1     | 2.00E-04 | NA | NA | 0.0013 | 0        |
| NM_001278    | CHUK        | 0                  | 0.366651522035438 | 1     | 2.00E-04 | NA | NA | 0.0013 | 0        |
| NM_024072    | DDX54       | 0                  | 0.366651522035438 | 1     | 2.00E-04 | NA | NA | 0.0013 | 0        |
| NM_001111322 | DDX54       | 0                  | 0.366651522035438 | 1     | 4.00E-04 | NA | NA | 0.0029 | 1.00E-04 |
| NM_018052    | VAC14       | 0                  | 0.366651522035438 | 1     | 2.00E-04 | NA | NA | 0.0013 | 0        |
| NM_007234    | DCTN3       | 0                  | 0.366651522035438 | 1     | 2.00E-04 | NA | NA | 0.0013 | 0        |
| NM_024348    | DCTN3       | 0                  | 0.366651522035438 | 1     | 2.00E-04 | NA | NA | 0.0013 | 0        |
| NM_001281425 | DCTN3       | 0                  | 0.366651522035438 | 1     | 2.00E-04 | NA | NA | 0.0013 | 0        |
| NM_001281427 | DCTN3       | 0                  | 0.366651522035438 | 1     | 2.00E-04 | NA | NA | 0.0013 | 0        |
| NM_001281426 | DCTN3       | 0                  | 0.366651522035438 | 1     | 2.00E-04 | NA | NA | 0.0013 | 0        |
| NM_025098    | MOGAT2      | 0.0104497955474784 | 0.377101317582917 | 1     | 2.00E-04 | NA | NA | 0.0013 | 0        |
| NM_001191015 | GSTO2       | 0                  | 0.367105860972285 | 1     | 2.00E-04 | NA | NA | 0.0013 | 0        |
| NM_001191014 | GSTO2       | 0                  | 0.367105860972285 | 1     | 2.00E-04 | NA | NA | 0.0013 | 0        |
| NM_152447    | LRFN5       | 0                  | 0.367105860972285 | 1     | 2.00E-04 | NA | NA | 0.0013 | 0        |
| NM_032955    | AIF1        | 0                  | 0.367105860972285 | 1     | 2.00E-04 | NA | NA | 0.0013 | 0        |
| NM_212551    | LYSMD1      | 0                  | 0.367105860972285 | 1     | 2.00E-04 | NA | NA | 0.0013 | 0        |
| NM_005760    | CEBPZ       | 0                  | 0.367105860972285 | 1     | 2.00E-04 | NA | NA | 0.0013 | 0        |
| NM_017415    | KLHL3       | 0                  | 0.367105860972285 | 1     | 2.00E-04 | NA | NA | 0.0013 | 0        |
| NM_001200018 | NAT6        | 0                  | 0.368014538845979 | 1     | 2.00E-04 | NA | NA | 0.0013 | 0        |
| NM_001174108 | ZBED6       | 0                  | 0.368468877782826 | 1     | 2.00E-04 | NA | NA | 0.0013 | 0        |
| NM_001242401 | GHR         | 0                  | 0.368468877782826 | 1     | 2.00E-04 | NA | NA | 0.0013 | 0        |
| NM_001161376 | C6orf136    | 0                  | 0.368468877782826 | 1     | 2.00E-04 | NA | NA | 0.0013 | 0        |

|              |                 |                   |                   |   |          |    |    |        |          |
|--------------|-----------------|-------------------|-------------------|---|----------|----|----|--------|----------|
| NM_145029    | <i>C6orf136</i> | 0                 | 0.368468877782826 | 1 | 2.00E-04 | NA | NA | 0.0013 | 0        |
| NM_001109938 | <i>C6orf136</i> | 0                 | 0.368468877782826 | 1 | 2.00E-04 | NA | NA | 0.0013 | 0        |
| NM_001199260 | <i>TOR1AIP2</i> | 0                 | 0.368468877782826 | 1 | 2.00E-04 | NA | NA | 0.0013 | 0        |
| NM_022347    | <i>TOR1AIP2</i> | 0                 | 0.368468877782826 | 1 | 2.00E-04 | NA | NA | 0.0013 | 0        |
| NM_145034    | <i>TOR1AIP2</i> | 0                 | 0.368468877782826 | 1 | 2.00E-04 | NA | NA | 0.0013 | 0        |
| NM_182972    | <i>IRF2BP2</i>  | 0                 | 0.368468877782826 | 1 | 2.00E-04 | NA | NA | 0.0013 | 0        |
| NM_001077397 | <i>IRF2BP2</i>  | 0                 | 0.368468877782826 | 1 | 2.00E-04 | NA | NA | 0.0013 | 0        |
| NM_181893    | <i>UBE2D3</i>   | 0                 | 0.368468877782826 | 1 | 2.00E-04 | NA | NA | 0.0013 | 0        |
| NM_181890    | <i>UBE2D3</i>   | 0                 | 0.368468877782826 | 1 | 2.00E-04 | NA | NA | 0.0013 | 0        |
| NR_033961    | <i>LSP1P3</i>   | 0                 | 0.369831894593367 | 1 | 2.00E-04 | NA | NA | 0.0013 | 0        |
| NM_152761    | <i>CXorf58</i>  | 0                 | 0.369831894593367 | 1 | 2.00E-04 | NA | NA | 0.0013 | 0        |
| NM_001169574 | <i>CXorf58</i>  | 0                 | 0.369831894593367 | 1 | 2.00E-04 | NA | NA | 0.0013 | 0        |
| NM_002358    | <i>MAD2L1</i>   | 0                 | 0.369831894593367 | 1 | 2.00E-04 | NA | NA | 0.0013 | 0        |
| NM_013352    | <i>DSE</i>      | 0                 | 0.370286233530214 | 1 | 2.00E-04 | NA | NA | 0.0013 | 0        |
| NM_005180    | <i>BMI1</i>     | 0                 | 0.37074057246706  | 1 | 2.00E-04 | NA | NA | 0.0013 | 0        |
| NM_001172303 | <i>MASTL</i>    | 0                 | 0.37074057246706  | 1 | 2.00E-04 | NA | NA | 0.0013 | 0        |
| NM_001172304 | <i>MASTL</i>    | 0                 | 0.37074057246706  | 1 | 2.00E-04 | NA | NA | 0.0013 | 0        |
| NM_032844    | <i>MASTL</i>    | 0                 | 0.37074057246706  | 1 | 2.00E-04 | NA | NA | 0.0013 | 0        |
| NM_003817    | <i>ADAM7</i>    | 0                 | 0.37074057246706  | 1 | 2.00E-04 | NA | NA | 0.0013 | 0        |
| NM_004170    | <i>SLC1A1</i>   | 0                 | 0.37074057246706  | 1 | 2.00E-04 | NA | NA | 0.0013 | 0        |
| NM_001079900 | <i>SPACA5B</i>  | 0                 | 0.37074057246706  | 1 | 2.00E-04 | NA | NA | 0.0013 | 0        |
| NM_001901    | <i>CTGF</i>     | 0                 | 0.37074057246706  | 1 | 2.00E-04 | NA | NA | 0.0013 | 0        |
| NM_003184    | <i>TAF2</i>     | 0                 | 0.37074057246706  | 1 | 2.00E-04 | NA | NA | 0.0013 | 0        |
| NM_001163812 | <i>C10orf2</i>  | 0                 | 0.371194911403907 | 1 | 2.00E-04 | NA | NA | 0.0013 | 0        |
| NM_021830    | <i>C10orf2</i>  | 0                 | 0.371194911403907 | 1 | 2.00E-04 | NA | NA | 0.0013 | 0        |
| NM_001163814 | <i>C10orf2</i>  | 0                 | 0.371194911403907 | 1 | 2.00E-04 | NA | NA | 0.0013 | 0        |
| NM_001163813 | <i>C10orf2</i>  | 0                 | 0.371194911403907 | 1 | 2.00E-04 | NA | NA | 0.0013 | 0        |
| NM_004210    | <i>NEURL</i>    | 0                 | 0.371194911403907 | 1 | 2.00E-04 | NA | NA | 0.0013 | 0        |
| NM_004380    | <i>CREBBP</i>   | 0                 | 0.371194911403907 | 1 | 2.00E-04 | NA | NA | 0.0013 | 0        |
| NM_001079846 | <i>CREBBP</i>   | 0                 | 0.371194911403907 | 1 | 2.00E-04 | NA | NA | 0.0013 | 0        |
| NM_004014    | <i>DMD</i>      | 0                 | 0.371194911403907 | 1 | 2.00E-04 | NA | NA | 0.0013 | 0        |
| NM_006770    | <i>MARCO</i>    | 0                 | 0.371649250340754 | 1 | 2.00E-04 | NA | NA | 0.0013 | 0        |
| NM_015384    | <i>NIPBL</i>    | 0                 | 0.371649250340754 | 1 | 2.00E-04 | NA | NA | 0.0013 | 0        |
| NM_133433    | <i>NIPBL</i>    | 0                 | 0.371649250340754 | 1 | 2.00E-04 | NA | NA | 0.0013 | 0        |
| NM_001130404 | <i>PRR20B</i>   | 0                 | 0.372103589277601 | 1 | 2.00E-04 | NA | NA | 0.0013 | 0        |
| NM_001130405 | <i>PRR20C</i>   | 0                 | 0.372103589277601 | 1 | 2.00E-04 | NA | NA | 0.0013 | 0        |
| NM_001130407 | <i>PRR20E</i>   | 0                 | 0.372103589277601 | 1 | 2.00E-04 | NA | NA | 0.0013 | 0        |
| NM_198441    | <i>PRR20A</i>   | 0                 | 0.372103589277601 | 1 | 2.00E-04 | NA | NA | 0.0013 | 0        |
| NR_038365    | <i>FLJ46300</i> | 0                 | 0.372103589277601 | 1 | 2.00E-04 | NA | NA | 0.0013 | 0        |
| NM_178221    | <i>ATG4C</i>    | 0                 | 0.372557928214448 | 1 | 2.00E-04 | NA | NA | 0.0013 | 0        |
| NM_032852    | <i>ATG4C</i>    | 0                 | 0.372557928214448 | 1 | 2.00E-04 | NA | NA | 0.0013 | 0        |
| NM_001165920 | <i>SERPINF2</i> | 0                 | 0.372557928214448 | 1 | 2.00E-04 | NA | NA | 0.0013 | 0        |
| NM_003014    | <i>SFRP4</i>    | 0                 | 0.372557928214448 | 1 | 4.00E-04 | NA | NA | 0.0029 | 1.00E-04 |
| NM_018154    | <i>ASF1B</i>    | 0.093139482053612 | 0.466151749204907 | 1 | 2.00E-04 | NA | NA | 0.0013 | 0        |

|              |              |                    |                   |   |          |    |    |        |          |
|--------------|--------------|--------------------|-------------------|---|----------|----|----|--------|----------|
| NM_001281501 | FADS2        | 0                  | 0.373012267151295 | 1 | 2.00E-04 | NA | NA | 0.0013 | 0        |
| NM_001281502 | FADS2        | 0                  | 0.373012267151295 | 1 | 2.00E-04 | NA | NA | 0.0013 | 0        |
| NM_144978    | CCDC138      | 0                  | 0.373012267151295 | 1 | 2.00E-04 | NA | NA | 0.0013 | 0        |
| NR_028501    | ECEL1P2      | 0                  | 0.373012267151295 | 1 | 2.00E-04 | NA | NA | 0.0013 | 0        |
| NM_016207    | CPSF3        | 0                  | 0.373466606088142 | 1 | 2.00E-04 | NA | NA | 0.0013 | 0        |
| NM_133638    | ADAMTS19     | 0                  | 0.373466606088142 | 1 | 2.00E-04 | NA | NA | 0.0013 | 0        |
| NM_021101    | CLDN1        | 0                  | 0.373466606088142 | 1 | 2.00E-04 | NA | NA | 0.0013 | 0        |
| NM_001170574 | FAM46D       | 0                  | 0.373920945024989 | 1 | 2.00E-04 | NA | NA | 0.0013 | 0        |
| NM_080746    | RPL10L       | 0.0190822353475693 | 0.393457519309405 | 1 | 2.00E-04 | NA | NA | 0.0013 | 0        |
| NM_016944    | TAS2R4       | 0                  | 0.374375283961836 | 1 | 2.00E-04 | NA | NA | 0.0013 | 0        |
| NM_032534    | KRBA1        | 0                  | 0.374375283961836 | 1 | 2.00E-04 | NA | NA | 0.0013 | 0        |
| NM_002278    | KRT32        | 0                  | 0.374375283961836 | 1 | 2.00E-04 | NA | NA | 0.0013 | 0        |
| NM_006502    | POLH         | 0                  | 0.374829622898682 | 1 | 2.00E-04 | NA | NA | 0.0013 | 0        |
| NM_001946    | DUSP6        | 0                  | 0.374829622898682 | 1 | 2.00E-04 | NA | NA | 0.0013 | 0        |
| NM_022652    | DUSP6        | 0                  | 0.374829622898682 | 1 | 2.00E-04 | NA | NA | 0.0013 | 0        |
| NM_001243473 | B9D1         | 0                  | 0.374829622898682 | 1 | 2.00E-04 | NA | NA | 0.0013 | 0        |
| NM_015681    | B9D1         | 0                  | 0.374829622898682 | 1 | 2.00E-04 | NA | NA | 0.0013 | 0        |
| NM_016086    | STYXL1       | 0.0699681962744207 | 0.444797819173103 | 1 | 2.00E-04 | NA | NA | 0.0013 | 0        |
| NM_012284    | KCNH3        | 0                  | 0.375283961835529 | 1 | 0.002    | NA | NA | 0.0087 | 3.00E-04 |
| NM_001282351 | FBXL19       | 0                  | 0.375283961835529 | 1 | 2.00E-04 | NA | NA | 0.0013 | 0        |
| NM_207391    | RGS9BP       | 0                  | 0.375283961835529 | 1 | 2.00E-04 | NA | NA | 0.0013 | 0        |
| NM_024501    | HOXD1        | 0                  | 0.375283961835529 | 1 | 2.00E-04 | NA | NA | 0.0013 | 0        |
| NM_001100875 | MARCH10      | 0                  | 0.375283961835529 | 1 | 2.00E-04 | NA | NA | 0.0013 | 0        |
| NM_017409    | HOXC10       | 0                  | 0.375738300772376 | 1 | 2.00E-04 | NA | NA | 0.0013 | 0        |
| NM_006769    | LMO4         | 0.0104497955474784 | 0.386642435256701 | 1 | 2.00E-04 | NA | NA | 0.0013 | 0        |
| NR_038979    | LOC100506207 | 0                  | 0.376192639709223 | 1 | 2.00E-04 | NA | NA | 0.0013 | 0        |
| NR_038980    | LOC100506207 | 0                  | 0.376192639709223 | 1 | 2.00E-04 | NA | NA | 0.0013 | 0        |
| NM_032557    | USP38        | 0                  | 0.377101317582917 | 1 | 2.00E-04 | NA | NA | 0.0013 | 0        |
| NR_031687    | MIR5481      | 0                  | 0.377101317582917 | 1 | 2.00E-04 | NA | NA | 0.0013 | 0        |
| NM_001199382 | RNF145       | 0                  | 0.377101317582917 | 1 | 2.00E-04 | NA | NA | 0.0013 | 0        |
| NM_172242    | SPAG6        | 0                  | 0.377555656519764 | 1 | 2.00E-04 | NA | NA | 0.0013 | 0        |
| NM_001253855 | SPAG6        | 0                  | 0.377555656519764 | 1 | 2.00E-04 | NA | NA | 0.0013 | 0        |
| NM_001253854 | SPAG6        | 0                  | 0.377555656519764 | 1 | 2.00E-04 | NA | NA | 0.0013 | 0        |
| NM_012443    | SPAG6        | 0                  | 0.377555656519764 | 1 | 2.00E-04 | NA | NA | 0.0013 | 0        |
| NR_038991    | RBM26-AS1    | 0                  | 0.377555656519764 | 1 | 2.00E-04 | NA | NA | 0.0013 | 0        |
| NM_007080    | LSM6         | 0                  | 0.377555656519764 | 1 | 2.00E-04 | NA | NA | 0.0013 | 0        |
| NM_015062    | PPRC1        | 0                  | 0.378009995456611 | 1 | 2.00E-04 | NA | NA | 0.0013 | 0        |
| NM_004865    | TBPL1        | 0                  | 0.378009995456611 | 1 | 2.00E-04 | NA | NA | 0.0013 | 0        |
| NM_198082    | CCDC57       | 0                  | 0.378464334393458 | 1 | 2.00E-04 | NA | NA | 0.0013 | 0        |
| NM_001142552 | DCHS2        | 0                  | 0.378464334393458 | 1 | 2.00E-04 | NA | NA | 0.0013 | 0        |
| NM_001142553 | DCHS2        | 0                  | 0.378464334393458 | 1 | 2.00E-04 | NA | NA | 0.0013 | 0        |
| NR_024120    | DBIL5P       | 0                  | 0.378918673330304 | 1 | 2.00E-04 | NA | NA | 0.0013 | 0        |
| NM_030919    | FAM83D       | 0                  | 0.379373012267151 | 1 | 2.00E-04 | NA | NA | 0.0013 | 0        |
| NM_012281    | KCND2        | 0                  | 0.379373012267151 | 1 | 2.00E-04 | NA | NA | 0.0013 | 0        |



|              |            |                   |                   |   |          |    |    |        |          |
|--------------|------------|-------------------|-------------------|---|----------|----|----|--------|----------|
| NM_005022    | PFN1       | 0                 | 0.379373012267151 | 1 | 2.00E-04 | NA | NA | 0.0013 | 0        |
| NM_173344    | ST3GAL1    | 0                 | 0.379373012267151 | 1 | 4.00E-04 | NA | NA | 0.0029 | 1.00E-04 |
| NM_003033    | ST3GAL1    | 0                 | 0.379373012267151 | 1 | 6.00E-04 | NA | NA | 0.0039 | 1.00E-04 |
| NR_038361    | RSBN1L-AS1 | 0                 | 0.379827351203998 | 1 | 2.00E-04 | NA | NA | 0.0013 | 0        |
| NM_004281    | BAG3       | 0                 | 0.380281690140845 | 1 | 2.00E-04 | NA | NA | 0.0013 | 0        |
| NM_207645    | C11orf87   | 0                 | 0.380281690140845 | 1 | 2.00E-04 | NA | NA | 0.0013 | 0        |
| NM_004753    | DHRS3      | 0                 | 0.380281690140845 | 1 | 2.00E-04 | NA | NA | 0.0013 | 0        |
| NM_002205    | ITGA5      | 0                 | 0.380281690140845 | 1 | 2.00E-04 | NA | NA | 0.0013 | 0        |
| NM_001164738 | CALCR      | 0                 | 0.380281690140845 | 1 | 2.00E-04 | NA | NA | 0.0013 | 0        |
| NM_182770    | CREM       | 0                 | 0.380736029077692 | 1 | 2.00E-04 | NA | NA | 0.0013 | 0        |
| NM_182769    | CREM       | 0                 | 0.380736029077692 | 1 | 2.00E-04 | NA | NA | 0.0013 | 0        |
| NM_001267567 | CREM       | 0                 | 0.380736029077692 | 1 | 2.00E-04 | NA | NA | 0.0013 | 0        |
| NM_001267566 | CREM       | 0                 | 0.380736029077692 | 1 | 2.00E-04 | NA | NA | 0.0013 | 0        |
| NR_102709    | UCHL1-AS1  | 0                 | 0.380736029077692 | 1 | 2.00E-04 | NA | NA | 0.0013 | 0        |
| NM_144596    | TTC8       | 0                 | 0.381190368014539 | 1 | 2.00E-04 | NA | NA | 0.0013 | 0        |
| NM_198309    | TTC8       | 0                 | 0.381190368014539 | 1 | 4.00E-04 | NA | NA | 0.0029 | 1.00E-04 |
| NM_198310    | TTC8       | 0                 | 0.381190368014539 | 1 | 2.00E-04 | NA | NA | 0.0013 | 0        |
| NR_038341    | STK4-AS1   | 0                 | 0.381190368014539 | 1 | 2.00E-04 | NA | NA | 0.0013 | 0        |
| NM_001276277 | PPIP5K2    | 0                 | 0.381644706951386 | 1 | 2.00E-04 | NA | NA | 0.0013 | 0        |
| NM_001281471 | PPIP5K2    | 0                 | 0.381644706951386 | 1 | 2.00E-04 | NA | NA | 0.0013 | 0        |
| NM_014376    | CYFIP2     | 0                 | 0.381644706951386 | 1 | 2.00E-04 | NA | NA | 0.0013 | 0        |
| NM_000157    | GBA        | 0                 | 0.381644706951386 | 1 | 2.00E-04 | NA | NA | 0.0013 | 0        |
| NM_001171812 | GBA        | 0                 | 0.381644706951386 | 1 | 2.00E-04 | NA | NA | 0.0013 | 0        |
| NM_017865    | ZNF692     | 0                 | 0.381644706951386 | 1 | 2.00E-04 | NA | NA | 0.0013 | 0        |
| NM_001193328 | ZNF692     | 0                 | 0.381644706951386 | 1 | 2.00E-04 | NA | NA | 0.0013 | 0        |
| NM_001136036 | ZNF692     | 0                 | 0.381644706951386 | 1 | 2.00E-04 | NA | NA | 0.0013 | 0        |
| NM_001256088 | C11orf45   | 0                 | 0.381644706951386 | 1 | 2.00E-04 | NA | NA | 0.0013 | 0        |
| NR_045767    | C11orf45   | 0                 | 0.381644706951386 | 1 | 2.00E-04 | NA | NA | 0.0013 | 0        |
| NM_001048265 | C9orf116   | 0                 | 0.381644706951386 | 1 | 0.0116   | NA | NA | 0.0652 | 0.0017   |
| NM_144654    | C9orf116   | 0                 | 0.381644706951386 | 1 | 0.0096   | NA | NA | 0.0539 | 0.0014   |
| NM_007178    | STRAP      | 0                 | 0.382099045888233 | 1 | 2.00E-04 | NA | NA | 0.0013 | 0        |
| NM_031212    | SLC25A28   | 0                 | 0.382099045888233 | 1 | 2.00E-04 | NA | NA | 0.0013 | 0        |
| NM_007111    | TFDP1      | 0                 | 0.38255338482508  | 1 | 2.00E-04 | NA | NA | 0.0013 | 0        |
| NR_027766    | NUDT16P1   | 0                 | 0.38255338482508  | 1 | 2.00E-04 | NA | NA | 0.0013 | 0        |
| NR_002949    | NUDT16P1   | 0                 | 0.38255338482508  | 1 | 2.00E-04 | NA | NA | 0.0013 | 0        |
| NM_024422    | DSC2       | 0                 | 0.38255338482508  | 1 | 2.00E-04 | NA | NA | 0.0013 | 0        |
| NM_004949    | DSC2       | 0                 | 0.38255338482508  | 1 | 2.00E-04 | NA | NA | 0.0013 | 0        |
| NM_001280794 | EPHB6      | 0                 | 0.383007723761926 | 1 | 2.00E-04 | NA | NA | 0.0013 | 0        |
| NM_001037333 | CYFIP2     | 0                 | 0.383462062698773 | 1 | 2.00E-04 | NA | NA | 0.0013 | 0        |
| NM_147185    | AKAP9      | 0                 | 0.383462062698773 | 1 | 2.00E-04 | NA | NA | 0.0013 | 0        |
| NM_005751    | AKAP9      | 0                 | 0.383462062698773 | 1 | 2.00E-04 | NA | NA | 0.0013 | 0        |
| NM_016180    | SLC45A2    | 0.182189913675602 | 0.566106315311222 | 1 | 2.00E-04 | NA | NA | 0.0013 | 0        |
| NM_001012509 | SLC45A2    | 0.182189913675602 | 0.566106315311222 | 1 | 2.00E-04 | NA | NA | 0.0013 | 0        |
| NM_025128    | MUS81      | 0                 | 0.38391640163562  | 1 | 2.00E-04 | NA | NA | 0.0013 | 0        |

|              |                |   |                   |        |          |    |    |        |          |
|--------------|----------------|---|-------------------|--------|----------|----|----|--------|----------|
| NM_198268    | <i>HIPK1</i>   | 0 | 0.384370740572467 | 1      | 2.00E-04 | NA | NA | 0.0013 | 0        |
| NM_152696    | <i>HIPK1</i>   | 0 | 0.384370740572467 | 0.9994 | 0.0012   | NA | NA | 0.0087 | 2.00E-04 |
| NR_037425    | <i>MIR3652</i> | 0 | 0.384370740572467 | 1      | 2.00E-04 | NA | NA | 0.0013 | 0        |
| NM_001160367 | <i>CDK10</i>   | 0 | 0.384370740572467 | 1      | 2.00E-04 | NA | NA | 0.0013 | 0        |
| NM_001098533 | <i>CDK10</i>   | 0 | 0.384370740572467 | 1      | 2.00E-04 | NA | NA | 0.0013 | 0        |
| NR_027703    | <i>CDK10</i>   | 0 | 0.384370740572467 | 1      | 2.00E-04 | NA | NA | 0.0013 | 0        |
| NM_052987    | <i>CDK10</i>   | 0 | 0.384370740572467 | 1      | 2.00E-04 | NA | NA | 0.0013 | 0        |
| NR_027702    | <i>CDK10</i>   | 0 | 0.384370740572467 | 1      | 2.00E-04 | NA | NA | 0.0013 | 0        |
| NM_052988    | <i>CDK10</i>   | 0 | 0.384370740572467 | 1      | 2.00E-04 | NA | NA | 0.0013 | 0        |
| NM_005680    | <i>TAF1B</i>   | 0 | 0.384370740572467 | 1      | 2.00E-04 | NA | NA | 0.0013 | 0        |
| NM_001277140 | <i>ACTR3</i>   | 0 | 0.384370740572467 | 1      | 2.00E-04 | NA | NA | 0.0013 | 0        |
| NM_206963    | <i>RARRES1</i> | 0 | 0.384370740572467 | 1      | 2.00E-04 | NA | NA | 0.0013 | 0        |
| NM_002888    | <i>RARRES1</i> | 0 | 0.384370740572467 | 1      | 2.00E-04 | NA | NA | 0.0013 | 0        |
| NM_018233    | <i>OGFOD1</i>  | 0 | 0.384825079509314 | 1      | 2.00E-04 | NA | NA | 0.0013 | 0        |
| NM_144723    | <i>ZMAT2</i>   | 0 | 0.384825079509314 | 1      | 2.00E-04 | NA | NA | 0.0013 | 0        |
| NM_001202546 | <i>CUX1</i>    | 0 | 0.384825079509314 | 1      | 2.00E-04 | NA | NA | 0.0013 | 0        |
| NM_018164    | <i>ASUN</i>    | 0 | 0.384825079509314 | 1      | 2.00E-04 | NA | NA | 0.0013 | 0        |
| NM_001099784 | <i>FBXL19</i>  | 0 | 0.385279418446161 | 1      | 2.00E-04 | NA | NA | 0.0013 | 0        |
| NM_018451    | <i>CENPJ</i>   | 0 | 0.385279418446161 | 1      | 2.00E-04 | NA | NA | 0.0013 | 0        |
| NR_047595    | <i>CENPJ</i>   | 0 | 0.385279418446161 | 1      | 2.00E-04 | NA | NA | 0.0013 | 0        |
| NR_047594    | <i>CENPJ</i>   | 0 | 0.385279418446161 | 1      | 2.00E-04 | NA | NA | 0.0013 | 0        |
| NM_001243342 | <i>CCDC40</i>  | 0 | 0.385733757383008 | 1      | 2.00E-04 | NA | NA | 0.0013 | 0        |
| NM_017950    | <i>CCDC40</i>  | 0 | 0.385733757383008 | 1      | 2.00E-04 | NA | NA | 0.0013 | 0        |
| NM_016202    | <i>ZNF580</i>  | 0 | 0.385733757383008 | 1      | 2.00E-04 | NA | NA | 0.0013 | 0        |
| NM_015922    | <i>NSDHL</i>   | 0 | 0.385733757383008 | 1      | 2.00E-04 | NA | NA | 0.0013 | 0        |
| NM_001129765 | <i>NSDHL</i>   | 0 | 0.385733757383008 | 1      | 2.00E-04 | NA | NA | 0.0013 | 0        |
| NM_020922    | <i>WNK3</i>    | 0 | 0.385733757383008 | 1      | 2.00E-04 | NA | NA | 0.0013 | 0        |
| NM_001002838 | <i>WNK3</i>    | 0 | 0.385733757383008 | 1      | 2.00E-04 | NA | NA | 0.0013 | 0        |
| NM_001282972 | <i>37500</i>   | 0 | 0.386188096319855 | 1      | 2.00E-04 | NA | NA | 0.0013 | 0        |
| NM_001008492 | <i>37500</i>   | 0 | 0.386188096319855 | 1      | 2.00E-04 | NA | NA | 0.0013 | 0        |
| NM_001282973 | <i>37500</i>   | 0 | 0.386188096319855 | 1      | 2.00E-04 | NA | NA | 0.0013 | 0        |
| NM_004404    | <i>37500</i>   | 0 | 0.386188096319855 | 1      | 2.00E-04 | NA | NA | 0.0013 | 0        |
| NM_001178117 | <i>MINPP1</i>  | 0 | 0.386642435256701 | 1      | 2.00E-04 | NA | NA | 0.0013 | 0        |
| NM_004897    | <i>MINPP1</i>  | 0 | 0.386642435256701 | 1      | 2.00E-04 | NA | NA | 0.0013 | 0        |
| NM_001130067 | <i>TRIM2</i>   | 0 | 0.386642435256701 | 1      | 2.00E-04 | NA | NA | 0.0013 | 0        |
| NM_001077395 | <i>DPH5</i>    | 0 | 0.386642435256701 | 1      | 2.00E-04 | NA | NA | 0.0013 | 0        |
| NM_001077394 | <i>DPH5</i>    | 0 | 0.386642435256701 | 1      | 2.00E-04 | NA | NA | 0.0013 | 0        |
| NM_015958    | <i>DPH5</i>    | 0 | 0.386642435256701 | 1      | 2.00E-04 | NA | NA | 0.0013 | 0        |
| NM_033449    | <i>FCHSD1</i>  | 0 | 0.386642435256701 | 1      | 2.00E-04 | NA | NA | 0.0013 | 0        |
| NM_133338    | <i>RAD17</i>   | 0 | 0.387096774193548 | 1      | 2.00E-04 | NA | NA | 0.0013 | 0        |
| NM_133344    | <i>RAD17</i>   | 0 | 0.387096774193548 | 1      | 2.00E-04 | NA | NA | 0.0013 | 0        |
| NM_005986    | <i>SOX1</i>    | 0 | 0.387551113130395 | 1      | 2.00E-04 | NA | NA | 0.0013 | 0        |
| NM_001267828 | <i>ZNF839</i>  | 0 | 0.387551113130395 | 1      | 2.00E-04 | NA | NA | 0.0013 | 0        |
| NM_007176    | <i>C14orf1</i> | 0 | 0.387551113130395 | 1      | 2.00E-04 | NA | NA | 0.0013 | 0        |

|              |          |   |                   |       |          |    |    |        |       |
|--------------|----------|---|-------------------|-------|----------|----|----|--------|-------|
| NM_021038    | MBNL1    | 0 | 0.388459791004089 | 1     | 2.00E-04 | NA | NA | 0.0013 | 0     |
| NM_207292    | MBNL1    | 0 | 0.388459791004089 | 1     | 2.00E-04 | NA | NA | 0.0013 | 0     |
| NM_001128620 | PAK1     | 0 | 0.388459791004089 | 1     | 2.00E-04 | NA | NA | 0.0013 | 0     |
| NM_002576    | PAK1     | 0 | 0.388459791004089 | 1     | 2.00E-04 | NA | NA | 0.0013 | 0     |
| NR_037654    | MTHFS    | 0 | 0.388459791004089 | 1     | 2.00E-04 | NA | NA | 0.0013 | 0     |
| NM_005869    | CWC27    | 0 | 0.388914129940936 | 1     | 2.00E-04 | NA | NA | 0.0013 | 0     |
| NM_006891    | CRYGD    | 0 | 0.388914129940936 | 1     | 2.00E-04 | NA | NA | 0.0013 | 0     |
| NM_175625    | RAB3IP   | 0 | 0.389368468877783 | 1     | 2.00E-04 | NA | NA | 0.0013 | 0     |
| NM_175623    | RAB3IP   | 0 | 0.389368468877783 | 1     | 2.00E-04 | NA | NA | 0.0013 | 0     |
| NR_103520    | RAB3IP   | 0 | 0.389368468877783 | 1     | 2.00E-04 | NA | NA | 0.0013 | 0     |
| NM_001015508 | PURG     | 0 | 0.389368468877783 | 1     | 2.00E-04 | NA | NA | 0.0013 | 0     |
| NM_134268    | CYGB     | 0 | 0.38982280781463  | 1     | 2.00E-04 | NA | NA | 0.0013 | 0     |
| NM_015602    | TOR1AIP1 | 0 | 0.390277146751477 | 1     | 2.00E-04 | NA | NA | 0.0013 | 0     |
| NM_001267578 | TOR1AIP1 | 0 | 0.390277146751477 | 1     | 2.00E-04 | NA | NA | 0.0013 | 0     |
| NM_001282729 | SUPT7L   | 0 | 0.390277146751477 | 1     | 2.00E-04 | NA | NA | 0.0013 | 0     |
| NM_001282730 | SUPT7L   | 0 | 0.390277146751477 | 1     | 2.00E-04 | NA | NA | 0.0013 | 0     |
| NM_001282731 | SUPT7L   | 0 | 0.390277146751477 | 1     | 2.00E-04 | NA | NA | 0.0013 | 0     |
| NM_001282732 | SUPT7L   | 0 | 0.390277146751477 | 1     | 2.00E-04 | NA | NA | 0.0013 | 0     |
| NM_014860    | SUPT7L   | 0 | 0.390277146751477 | 1     | 2.00E-04 | NA | NA | 0.0013 | 0     |
| NM_178554    | KY       | 0 | 0.390277146751477 | 1     | 2.00E-04 | NA | NA | 0.0013 | 0     |
| NM_001128164 | ATXN1    | 0 | 0.390277146751477 | 1     | 2.00E-04 | NA | NA | 0.0013 | 0     |
| NM_000332    | ATXN1    | 0 | 0.390277146751477 | 1     | 2.00E-04 | NA | NA | 0.0013 | 0     |
| NM_003214    | TEAD3    | 0 | 0.390277146751477 | 1     | 2.00E-04 | NA | NA | 0.0013 | 0     |
| NM_015868    | KIR2DL3  | 0 | 0.390731485688323 | 1     | 2.00E-04 | NA | NA | 0.0013 | 0     |
| NM_005721    | ACTR3    | 0 | 0.390731485688323 | 1     | 2.00E-04 | NA | NA | 0.0013 | 0     |
| NR_102318    | ACTR3    | 0 | 0.390731485688323 | 1     | 2.00E-04 | NA | NA | 0.0013 | 0     |
| NM_001178134 | CXCL12   | 0 | 0.39118582462517  | 1     | 2.00E-04 | NA | NA | 0.0013 | 0     |
| NM_000609    | CXCL12   | 0 | 0.39118582462517  | 1     | 2.00E-04 | NA | NA | 0.0013 | 0     |
| NM_199168    | CXCL12   | 0 | 0.39118582462517  | 1     | 2.00E-04 | NA | NA | 0.0013 | 0     |
| NM_001033886 | CXCL12   | 0 | 0.39118582462517  | 1     | 2.00E-04 | NA | NA | 0.0013 | 0     |
| NM_001277990 | CXCL12   | 0 | 0.39118582462517  | 1     | 2.00E-04 | NA | NA | 0.0013 | 0     |
| NM_001962    | EFNA5    | 0 | 0.39118582462517  | 1     | 2.00E-04 | NA | NA | 0.0013 | 0     |
| NR_028492    | CFL1P1   | 0 | 0.391640163562017 | 1     | 2.00E-04 | NA | NA | 0.0013 | 0     |
| NM_002180    | IGHMBP2  | 0 | 0.391640163562017 | 1     | 2.00E-04 | NA | NA | 0.0013 | 0     |
| NM_001282795 | ZNF7     | 0 | 0.391640163562017 | 1     | 2.00E-04 | NA | NA | 0.0013 | 0     |
| NM_001282797 | ZNF7     | 0 | 0.391640163562017 | 1     | 2.00E-04 | NA | NA | 0.0013 | 0     |
| NM_003416    | ZNF7     | 0 | 0.391640163562017 | 1     | 2.00E-04 | NA | NA | 0.0013 | 0     |
| NM_001282796 | ZNF7     | 0 | 0.391640163562017 | 1     | 2.00E-04 | NA | NA | 0.0013 | 0     |
| NR_038866    | BSN-AS2  | 0 | 0.391640163562017 | 0.969 | 0.028    | NA | NA | 0.1978 | 0.004 |
| NM_016315    | GULP1    | 0 | 0.392094502498864 | 1     | 2.00E-04 | NA | NA | 0.0013 | 0     |
| NM_001252669 | GULP1    | 0 | 0.392094502498864 | 1     | 2.00E-04 | NA | NA | 0.0013 | 0     |
| NM_001252668 | GULP1    | 0 | 0.392094502498864 | 1     | 2.00E-04 | NA | NA | 0.0013 | 0     |
| NM_194455    | KRIT1    | 0 | 0.392094502498864 | 1     | 2.00E-04 | NA | NA | 0.0013 | 0     |
| NM_194454    | KRIT1    | 0 | 0.392094502498864 | 1     | 2.00E-04 | NA | NA | 0.0013 | 0     |

|              |             |                   |                   |   |          |    |    |        |          |
|--------------|-------------|-------------------|-------------------|---|----------|----|----|--------|----------|
| NM_194456    | KRIT1       | 0                 | 0.392094502498864 | 1 | 2.00E-04 | NA | NA | 0.0013 | 0        |
| NM_004912    | KRIT1       | 0                 | 0.392094502498864 | 1 | 2.00E-04 | NA | NA | 0.0013 | 0        |
| NM_001013406 | KRIT1       | 0                 | 0.392094502498864 | 1 | 2.00E-04 | NA | NA | 0.0013 | 0        |
| NM_001765    | CD1C        | 0                 | 0.392548841435711 | 1 | 2.00E-04 | NA | NA | 0.0013 | 0        |
| NM_001197319 | CLEC2D      | 0                 | 0.392548841435711 | 1 | 2.00E-04 | NA | NA | 0.0013 | 0        |
| NM_001197318 | CLEC2D      | 0                 | 0.392548841435711 | 1 | 2.00E-04 | NA | NA | 0.0013 | 0        |
| NM_001197317 | CLEC2D      | 0                 | 0.392548841435711 | 1 | 2.00E-04 | NA | NA | 0.0013 | 0        |
| NR_036693    | CLEC2D      | 0                 | 0.392548841435711 | 1 | 2.00E-04 | NA | NA | 0.0013 | 0        |
| NM_013269    | CLEC2D      | 0                 | 0.392548841435711 | 1 | 2.00E-04 | NA | NA | 0.0013 | 0        |
| NM_001004419 | CLEC2D      | 0                 | 0.392548841435711 | 1 | 2.00E-04 | NA | NA | 0.0013 | 0        |
| NM_003941    | WASL        | 0                 | 0.392548841435711 | 1 | 2.00E-04 | NA | NA | 0.0013 | 0        |
| NM_005614    | RHEB        | 0                 | 0.392548841435711 | 1 | 2.00E-04 | NA | NA | 0.0013 | 0        |
| NM_005372    | MOS         | 0                 | 0.392548841435711 | 1 | 2.00E-04 | NA | NA | 0.0013 | 0        |
| NM_001048212 | CEMP1       | 0                 | 0.393003180372558 | 1 | 2.00E-04 | NA | NA | 0.0013 | 0        |
| NR_046106    | NOL8        | 0                 | 0.393003180372558 | 1 | 2.00E-04 | NA | NA | 0.0013 | 0        |
| NM_001256394 | NOL8        | 0                 | 0.393003180372558 | 1 | 2.00E-04 | NA | NA | 0.0013 | 0        |
| NM_017948    | NOL8        | 0                 | 0.393003180372558 | 1 | 2.00E-04 | NA | NA | 0.0013 | 0        |
| NM_198498    | C11orf53    | 0                 | 0.393457519309405 | 1 | 2.00E-04 | NA | NA | 0.0013 | 0        |
| NM_018131    | CEP55       | 0                 | 0.393911858246252 | 1 | 2.00E-04 | NA | NA | 0.0013 | 0        |
| NM_025045    | BAIAP2L2    | 0                 | 0.393911858246252 | 1 | 2.00E-04 | NA | NA | 0.0013 | 0        |
| NM_001193493 | SLC1A4      | 0                 | 0.394366197183099 | 1 | 2.00E-04 | NA | NA | 0.0013 | 0        |
| NM_170740    | ALDH5A1     | 0                 | 0.394366197183099 | 1 | 2.00E-04 | NA | NA | 0.0013 | 0        |
| NM_001080    | ALDH5A1     | 0                 | 0.394366197183099 | 1 | 2.00E-04 | NA | NA | 0.0013 | 0        |
| NM_001185076 | FMR1        | 0                 | 0.394366197183099 | 1 | 2.00E-04 | NA | NA | 0.0013 | 0        |
| NR_033700    | FMR1        | 0                 | 0.394366197183099 | 1 | 2.00E-04 | NA | NA | 0.0013 | 0        |
| NM_001185082 | FMR1        | 0                 | 0.394366197183099 | 1 | 2.00E-04 | NA | NA | 0.0013 | 0        |
| NM_001185075 | FMR1        | 0                 | 0.394366197183099 | 1 | 2.00E-04 | NA | NA | 0.0013 | 0        |
| NM_001185081 | FMR1        | 0                 | 0.394366197183099 | 1 | 2.00E-04 | NA | NA | 0.0013 | 0        |
| NM_002024    | FMR1        | 0                 | 0.394366197183099 | 1 | 2.00E-04 | NA | NA | 0.0013 | 0        |
| NR_033699    | FMR1        | 0                 | 0.394366197183099 | 1 | 2.00E-04 | NA | NA | 0.0013 | 0        |
| NM_032014    | MRPS24      | 0                 | 0.394366197183099 | 1 | 2.00E-04 | NA | NA | 0.0013 | 0        |
| NM_001098205 | HNRNPF      | 0.102680599727397 | 0.497501135847342 | 1 | 2.00E-04 | NA | NA | 0.0013 | 0        |
| NR_103812    | INTS6-AS1   | 0                 | 0.394820536119945 | 1 | 2.00E-04 | NA | NA | 0.0013 | 0        |
| NM_182644    | EPHA3       | 0                 | 0.394820536119945 | 1 | 2.00E-04 | NA | NA | 0.0013 | 0        |
| NM_005233    | EPHA3       | 0                 | 0.394820536119945 | 1 | 2.00E-04 | NA | NA | 0.0013 | 0        |
| NM_031480    | RIOK1       | 0                 | 0.394820536119945 | 1 | 2.00E-04 | NA | NA | 0.0013 | 0        |
| NM_013959    | NRG1        | 0                 | 0.394820536119945 | 1 | 2.00E-04 | NA | NA | 0.0013 | 0        |
| NM_001003845 | SP5         | 0                 | 0.395274875056792 | 1 | 4.00E-04 | NA | NA | 0.0029 | 1.00E-04 |
| NM_020750    | XPO5        | 0                 | 0.395274875056792 | 1 | 2.00E-04 | NA | NA | 0.0013 | 0        |
| NM_000139    | MS4A2       | 0                 | 0.395729213993639 | 1 | 2.00E-04 | NA | NA | 0.0013 | 0        |
| NM_001256916 | MS4A2       | 0                 | 0.395729213993639 | 1 | 2.00E-04 | NA | NA | 0.0013 | 0        |
| NR_104027    | SMARCA5-AS1 | 0                 | 0.395729213993639 | 1 | 2.00E-04 | NA | NA | 0.0013 | 0        |
| NM_001004058 | OR8K5       | 0                 | 0.396183552930486 | 1 | 2.00E-04 | NA | NA | 0.0013 | 0        |
| NM_001281534 | EPB41L3     | 0                 | 0.396183552930486 | 1 | 2.00E-04 | NA | NA | 0.0013 | 0        |

|              |            |   |                   |   |          |    |    |        |          |
|--------------|------------|---|-------------------|---|----------|----|----|--------|----------|
| NM_012307    | EPB41L3    | 0 | 0.396183552930486 | 1 | 2.00E-04 | NA | NA | 0.0013 | 0        |
| NM_001014809 | CRMP1      | 0 | 0.396183552930486 | 1 | 2.00E-04 | NA | NA | 0.0013 | 0        |
| NM_001134442 | ZNF502     | 0 | 0.396637891867333 | 1 | 2.00E-04 | NA | NA | 0.0013 | 0        |
| NM_001134441 | ZNF502     | 0 | 0.396637891867333 | 1 | 2.00E-04 | NA | NA | 0.0013 | 0        |
| NM_001134440 | ZNF502     | 0 | 0.396637891867333 | 1 | 2.00E-04 | NA | NA | 0.0013 | 0        |
| NM_033210    | ZNF502     | 0 | 0.396637891867333 | 1 | 2.00E-04 | NA | NA | 0.0013 | 0        |
| NM_001282880 | ZNF502     | 0 | 0.396637891867333 | 1 | 2.00E-04 | NA | NA | 0.0013 | 0        |
| NM_201613    | IKBIP      | 0 | 0.396637891867333 | 1 | 2.00E-04 | NA | NA | 0.0013 | 0        |
| NM_201612    | IKBIP      | 0 | 0.396637891867333 | 1 | 2.00E-04 | NA | NA | 0.0013 | 0        |
| NM_153687    | IKBIP      | 0 | 0.396637891867333 | 1 | 2.00E-04 | NA | NA | 0.0013 | 0        |
| NR_027107    | MGC45800   | 0 | 0.396637891867333 | 1 | 2.00E-04 | NA | NA | 0.0013 | 0        |
| NM_133339    | RAD17      | 0 | 0.39709223080418  | 1 | 2.00E-04 | NA | NA | 0.0013 | 0        |
| NM_017984    | ZCWPW1     | 0 | 0.39709223080418  | 1 | 2.00E-04 | NA | NA | 0.0013 | 0        |
| NM_001258008 | ZCWPW1     | 0 | 0.39709223080418  | 1 | 4.00E-04 | NA | NA | 0.0029 | 1.00E-04 |
| NM_178864    | NPAS4      | 0 | 0.397546569741027 | 1 | 2.00E-04 | NA | NA | 0.0013 | 0        |
| NM_033510    | DISP2      | 0 | 0.397546569741027 | 1 | 2.00E-04 | NA | NA | 0.0013 | 0        |
| NM_001077427 | LYPD1      | 0 | 0.397546569741027 | 1 | 2.00E-04 | NA | NA | 0.0013 | 0        |
| NM_001020825 | NR3C1      | 0 | 0.397546569741027 | 1 | 2.00E-04 | NA | NA | 0.0013 | 0        |
| NM_001204259 | NR3C1      | 0 | 0.397546569741027 | 1 | 2.00E-04 | NA | NA | 0.0013 | 0        |
| NM_001204258 | NR3C1      | 0 | 0.397546569741027 | 1 | 2.00E-04 | NA | NA | 0.0013 | 0        |
| NM_001204265 | NR3C1      | 0 | 0.397546569741027 | 1 | 2.00E-04 | NA | NA | 0.0013 | 0        |
| NM_001204264 | NR3C1      | 0 | 0.397546569741027 | 1 | 2.00E-04 | NA | NA | 0.0013 | 0        |
| NM_001204263 | NR3C1      | 0 | 0.397546569741027 | 1 | 2.00E-04 | NA | NA | 0.0013 | 0        |
| NM_001204262 | NR3C1      | 0 | 0.397546569741027 | 1 | 2.00E-04 | NA | NA | 0.0013 | 0        |
| NM_001024094 | NR3C1      | 0 | 0.397546569741027 | 1 | 2.00E-04 | NA | NA | 0.0013 | 0        |
| NM_001204261 | NR3C1      | 0 | 0.397546569741027 | 1 | 2.00E-04 | NA | NA | 0.0013 | 0        |
| NM_001204260 | NR3C1      | 0 | 0.397546569741027 | 1 | 2.00E-04 | NA | NA | 0.0013 | 0        |
| NM_000176    | NR3C1      | 0 | 0.397546569741027 | 1 | 2.00E-04 | NA | NA | 0.0013 | 0        |
| NM_001525    | HCRTR1     | 0 | 0.398000908677874 | 1 | 2.00E-04 | NA | NA | 0.0013 | 0        |
| NM_004763    | ITGB1BP1   | 0 | 0.398000908677874 | 1 | 2.00E-04 | NA | NA | 0.0013 | 0        |
| NM_022334    | ITGB1BP1   | 0 | 0.398000908677874 | 1 | 2.00E-04 | NA | NA | 0.0013 | 0        |
| NR_034172    | KANSL1-AS1 | 0 | 0.398455247614721 | 1 | 2.00E-04 | NA | NA | 0.0013 | 0        |
| NM_001086    | AADAC      | 0 | 0.398455247614721 | 1 | 2.00E-04 | NA | NA | 0.0013 | 0        |
| NM_001017405 | MAEA       | 0 | 0.398455247614721 | 1 | 2.00E-04 | NA | NA | 0.0013 | 0        |
| NM_005882    | MAEA       | 0 | 0.398455247614721 | 1 | 2.00E-04 | NA | NA | 0.0013 | 0        |
| NM_001134659 | PRR23A     | 0 | 0.398455247614721 | 1 | 2.00E-04 | NA | NA | 0.0013 | 0        |
| NM_001128303 | LACC1      | 0 | 0.398909586551567 | 1 | 2.00E-04 | NA | NA | 0.0013 | 0        |
| NM_001282332 | TSEN34     | 0 | 0.398909586551567 | 1 | 2.00E-04 | NA | NA | 0.0013 | 0        |
| NR_027790    | LINC00478  | 0 | 0.398909586551567 | 1 | 2.00E-04 | NA | NA | 0.0013 | 0        |
| NM_152316    | ARL14EP    | 0 | 0.399363925488414 | 1 | 2.00E-04 | NA | NA | 0.0013 | 0        |
| NM_001134473 | GSE1       | 0 | 0.399363925488414 | 1 | 2.00E-04 | NA | NA | 0.0013 | 0        |
| NM_006783    | GJB6       | 0 | 0.399363925488414 | 1 | 2.00E-04 | NA | NA | 0.0013 | 0        |
| NM_031854    | KRTAP4-12  | 0 | 0.399363925488414 | 1 | 2.00E-04 | NA | NA | 0.0013 | 0        |
| NM_000233    | LHCGR      | 0 | 0.399363925488414 | 1 | 2.00E-04 | NA | NA | 0.0013 | 0        |

|              |            |                   |                   |   |          |    |    |        |          |
|--------------|------------|-------------------|-------------------|---|----------|----|----|--------|----------|
| NR_037897    | SAP30L-AS1 | 0                 | 0.399363925488414 | 1 | 4.00E-04 | NA | NA | 0.0029 | 1.00E-04 |
| NM_002849    | PTPRR      | 0                 | 0.399818264425261 | 1 | 2.00E-04 | NA | NA | 0.0013 | 0        |
| NM_001797    | CDH11      | 0                 | 0.399818264425261 | 1 | 2.00E-04 | NA | NA | 0.0013 | 0        |
| NM_018256    | WDR12      | 0                 | 0.399818264425261 | 1 | 2.00E-04 | NA | NA | 0.0013 | 0        |
| NM_003325    | HIRA       | 0                 | 0.399818264425261 | 1 | 2.00E-04 | NA | NA | 0.0013 | 0        |
| NM_001278245 | ZFAND5     | 0                 | 0.399818264425261 | 1 | 2.00E-04 | NA | NA | 0.0013 | 0        |
| NM_001278244 | ZFAND5     | 0                 | 0.399818264425261 | 1 | 2.00E-04 | NA | NA | 0.0013 | 0        |
| NM_001278243 | ZFAND5     | 0                 | 0.399818264425261 | 1 | 2.00E-04 | NA | NA | 0.0013 | 0        |
| NM_007107    | SSR3       | 0.072694229895502 | 0.47296683325761  | 1 | 2.00E-04 | NA | NA | 0.0013 | 0        |
| NR_002144    | LOC407835  | 0                 | 0.400272603362108 | 1 | 2.00E-04 | NA | NA | 0.0013 | 0        |
| NM_001824    | CKM        | 0                 | 0.400272603362108 | 1 | 2.00E-04 | NA | NA | 0.0013 | 0        |
| NM_015642    | ZBTB20     | 0                 | 0.400272603362108 | 1 | 2.00E-04 | NA | NA | 0.0013 | 0        |
| NM_006762    | LAPTM5     | 0                 | 0.400726942298955 | 1 | 2.00E-04 | NA | NA | 0.0013 | 0        |
| NM_033387    | FAM78A     | 0                 | 0.400726942298955 | 1 | 0.0108   | NA | NA | 0.0652 | 0.0016   |
| NM_030579    | CYB5B      | 0                 | 0.401181281235802 | 1 | 2.00E-04 | NA | NA | 0.0013 | 0        |
| NM_024704    | KIF16B     | 0                 | 0.401181281235802 | 1 | 2.00E-04 | NA | NA | 0.0013 | 0        |
| NM_001199866 | KIF16B     | 0                 | 0.401181281235802 | 1 | 2.00E-04 | NA | NA | 0.0013 | 0        |
| NM_001199865 | KIF16B     | 0                 | 0.401181281235802 | 1 | 2.00E-04 | NA | NA | 0.0013 | 0        |
| NM_025204    | TRABD      | 0                 | 0.401635620172649 | 1 | 2.00E-04 | NA | NA | 0.0013 | 0        |
| NM_001164586 | IGFN1      | 0                 | 0.402089959109496 | 1 | 2.00E-04 | NA | NA | 0.0013 | 0        |
| NM_175911    | OR2L13     | 0                 | 0.402089959109496 | 1 | 2.00E-04 | NA | NA | 0.0013 | 0        |
| NM_001242354 | ODF2       | 0                 | 0.402544298046343 | 1 | 2.00E-04 | NA | NA | 0.0013 | 0        |
| NM_153439    | ODF2       | 0                 | 0.402544298046343 | 1 | 2.00E-04 | NA | NA | 0.0013 | 0        |
| NM_153435    | ODF2       | 0                 | 0.402544298046343 | 1 | 2.00E-04 | NA | NA | 0.0013 | 0        |
| NM_153432    | ODF2       | 0                 | 0.402544298046343 | 1 | 2.00E-04 | NA | NA | 0.0013 | 0        |
| NM_002540    | ODF2       | 0                 | 0.402544298046343 | 1 | 2.00E-04 | NA | NA | 0.0013 | 0        |
| NM_001242353 | ODF2       | 0                 | 0.402544298046343 | 1 | 2.00E-04 | NA | NA | 0.0013 | 0        |
| NM_001242352 | ODF2       | 0                 | 0.402544298046343 | 1 | 2.00E-04 | NA | NA | 0.0013 | 0        |
| NM_001127182 | CEP55      | 0                 | 0.402998636983189 | 1 | 2.00E-04 | NA | NA | 0.0013 | 0        |
| NM_016587    | CBX3       | 0                 | 0.402998636983189 | 1 | 2.00E-04 | NA | NA | 0.0013 | 0        |
| NR_030366    | MIR636     | 0                 | 0.402998636983189 | 1 | 2.00E-04 | NA | NA | 0.0013 | 0        |
| NR_002981    | SNORA51    | 0                 | 0.403452975920036 | 1 | 2.00E-04 | NA | NA | 0.0013 | 0        |
| NM_001135244 | TCOF1      | 0                 | 0.403907314856883 | 1 | 2.00E-04 | NA | NA | 0.0013 | 0        |
| NM_001135245 | TCOF1      | 0                 | 0.403907314856883 | 1 | 2.00E-04 | NA | NA | 0.0013 | 0        |
| NM_000356    | TCOF1      | 0                 | 0.403907314856883 | 1 | 2.00E-04 | NA | NA | 0.0013 | 0        |
| NM_001195141 | TCOF1      | 0                 | 0.403907314856883 | 1 | 2.00E-04 | NA | NA | 0.0013 | 0        |
| NM_001135243 | TCOF1      | 0                 | 0.403907314856883 | 1 | 2.00E-04 | NA | NA | 0.0013 | 0        |
| NM_001008657 | TCOF1      | 0                 | 0.403907314856883 | 1 | 2.00E-04 | NA | NA | 0.0013 | 0        |
| NM_001145845 | ROBO1      | 0                 | 0.40436165379373  | 1 | 2.00E-04 | NA | NA | 0.0013 | 0        |
| NM_133631    | ROBO1      | 0                 | 0.40436165379373  | 1 | 2.00E-04 | NA | NA | 0.0013 | 0        |
| NM_003374    | VDAC1      | 0                 | 0.40436165379373  | 1 | 2.00E-04 | NA | NA | 0.0013 | 0        |
| NM_000642    | AGL        | 0                 | 0.404815992730577 | 1 | 2.00E-04 | NA | NA | 0.0013 | 0        |
| NM_018212    | ENAH       | 0                 | 0.404815992730577 | 1 | 2.00E-04 | NA | NA | 0.0013 | 0        |
| NM_001008493 | ENAH       | 0                 | 0.404815992730577 | 1 | 2.00E-04 | NA | NA | 0.0013 | 0        |

|              |           |                    |                   |        |          |    |    |        |          |
|--------------|-----------|--------------------|-------------------|--------|----------|----|----|--------|----------|
| NM_138318    | KCNK10    | 0                  | 0.404815992730577 | 1      | 2.00E-04 | NA | NA | 0.0013 | 0        |
| NM_181866    | ACOT7     | 0                  | 0.405270331667424 | 1      | 2.00E-04 | NA | NA | 0.0013 | 0        |
| NM_181535    | KRT28     | 0.0072694229895502 | 0.412994093593821 | 1      | 2.00E-04 | NA | NA | 0.0013 | 0        |
| NM_017924    | C14orf119 | 0                  | 0.405724670604271 | 1      | 2.00E-04 | NA | NA | 0.0013 | 0        |
| NM_183372    | NBPF11    | 0                  | 0.405724670604271 | 1      | 2.00E-04 | NA | NA | 0.0013 | 0        |
| NR_046188    | NBPF24    | 0                  | 0.405724670604271 | 1      | 2.00E-04 | NA | NA | 0.0013 | 0        |
| NM_133262    | ATP6V1G3  | 0                  | 0.405724670604271 | 1      | 2.00E-04 | NA | NA | 0.0013 | 0        |
| NM_133326    | ATP6V1G3  | 0                  | 0.405724670604271 | 1      | 2.00E-04 | NA | NA | 0.0013 | 0        |
| NM_021973    | HAND2     | 0                  | 0.405724670604271 | 1      | 2.00E-04 | NA | NA | 0.0013 | 0        |
| NM_001252296 | CEBPG     | 0                  | 0.406179009541118 | 1      | 2.00E-04 | NA | NA | 0.0013 | 0        |
| NM_018434    | RNF130    | 0                  | 0.406179009541118 | 1      | 2.00E-04 | NA | NA | 0.0013 | 0        |
| NM_001280801 | RNF130    | 0                  | 0.406179009541118 | 1      | 2.00E-04 | NA | NA | 0.0013 | 0        |
| NM_001256113 | TDRP      | 0                  | 0.406179009541118 | 1      | 2.00E-04 | NA | NA | 0.0013 | 0        |
| NR_026580    | TFDP1     | 0                  | 0.406633348477965 | 1      | 2.00E-04 | NA | NA | 0.0013 | 0        |
| NM_080677    | DYNLL2    | 0                  | 0.406633348477965 | 1      | 2.00E-04 | NA | NA | 0.0013 | 0        |
| NM_002357    | MXD1      | 0                  | 0.406633348477965 | 1      | 2.00E-04 | NA | NA | 0.0013 | 0        |
| NM_001202514 | MXD1      | 0                  | 0.406633348477965 | 1      | 2.00E-04 | NA | NA | 0.0013 | 0        |
| NM_001202513 | MXD1      | 0                  | 0.406633348477965 | 1      | 2.00E-04 | NA | NA | 0.0013 | 0        |
| NM_001161819 | MYO1B     | 0                  | 0.406633348477965 | 1      | 2.00E-04 | NA | NA | 0.0013 | 0        |
| NM_001003700 | RREB1     | 0                  | 0.406633348477965 | 1      | 2.00E-04 | NA | NA | 0.0013 | 0        |
| NM_001003699 | RREB1     | 0                  | 0.406633348477965 | 1      | 2.00E-04 | NA | NA | 0.0013 | 0        |
| NM_001003698 | RREB1     | 0                  | 0.406633348477965 | 1      | 2.00E-04 | NA | NA | 0.0013 | 0        |
| NM_000325    | PITX2     | 0                  | 0.406633348477965 | 1      | 2.00E-04 | NA | NA | 0.0013 | 0        |
| NM_004214    | FIBP      | 0                  | 0.407087687414811 | 1      | 4.00E-04 | NA | NA | 0.0029 | 1.00E-04 |
| NM_198897    | FIBP      | 0                  | 0.407087687414811 | 0.9998 | 2.00E-04 | NA | NA | 0.0013 | 0        |
| NM_058195    | CDKN2A    | 0                  | 0.407087687414811 | 1      | 2.00E-04 | NA | NA | 0.0013 | 0        |
| NR_026715    | RPL13AP6  | 0.0208995910949568 | 0.428441617446615 | 1      | 2.00E-04 | NA | NA | 0.0013 | 0        |
| NM_133340    | RAD17     | 0                  | 0.407996365288505 | 1      | 2.00E-04 | NA | NA | 0.0013 | 0        |
| NM_133341    | RAD17     | 0                  | 0.407996365288505 | 1      | 2.00E-04 | NA | NA | 0.0013 | 0        |
| NM_002873    | RAD17     | 0                  | 0.407996365288505 | 1      | 2.00E-04 | NA | NA | 0.0013 | 0        |
| NM_173584    | EFCAB4A   | 0                  | 0.408450704225352 | 1      | 2.00E-04 | NA | NA | 0.0013 | 0        |
| NM_172250    | MMAA      | 0                  | 0.408450704225352 | 0.9998 | 4.00E-04 | NA | NA | 0.0029 | 1.00E-04 |
| NM_003187    | TAF9      | 0                  | 0.408450704225352 | 1      | 2.00E-04 | NA | NA | 0.0013 | 0        |
| NM_016283    | AK6       | 0                  | 0.408450704225352 | 1      | 2.00E-04 | NA | NA | 0.0013 | 0        |
| NM_001171197 | ELAVL2    | 0                  | 0.408905043162199 | 1      | 2.00E-04 | NA | NA | 0.0013 | 0        |
| NM_138773    | SLC25A46  | 0                  | 0.409813721035893 | 1      | 2.00E-04 | NA | NA | 0.0013 | 0        |
| NM_001565    | CXCL10    | 0.135847342117219  | 0.545661063153112 | 1      | 2.00E-04 | NA | NA | 0.0013 | 0        |
| NM_152432    | ARHGAP42  | 0                  | 0.41026805997274  | 1      | 2.00E-04 | NA | NA | 0.0013 | 0        |
| NM_006441    | MTHFS     | 0                  | 0.410722398909587 | 1      | 2.00E-04 | NA | NA | 0.0013 | 0        |
| NM_016358    | IRX4      | 0                  | 0.410722398909587 | 1      | 8.00E-04 | NA | NA | 0.0045 | 1.00E-04 |
| NM_001270530 | RNF111    | 0                  | 0.411176737846433 | 1      | 2.00E-04 | NA | NA | 0.0013 | 0        |
| NM_004286    | GTPBP1    | 0                  | 0.411176737846433 | 1      | 2.00E-04 | NA | NA | 0.0013 | 0        |
| NM_178123    | SESTD1    | 0                  | 0.411176737846433 | 1      | 2.00E-04 | NA | NA | 0.0013 | 0        |
| NM_003517    | HIST2H2AC | 0                  | 0.41163107678328  | 1      | 2.00E-04 | NA | NA | 0.0013 | 0        |

|              |           |                   |                   |        |          |    |    |        |          |
|--------------|-----------|-------------------|-------------------|--------|----------|----|----|--------|----------|
| NM_025228    | TRAF3IP3  | 0                 | 0.41163107678328  | 1      | 2.00E-04 | NA | NA | 0.0013 | 0        |
| NM_002894    | RBBP8     | 0                 | 0.41163107678328  | 1      | 2.00E-04 | NA | NA | 0.0013 | 0        |
| NM_203291    | RBBP8     | 0                 | 0.41163107678328  | 1      | 2.00E-04 | NA | NA | 0.0013 | 0        |
| NM_203292    | RBBP8     | 0                 | 0.41163107678328  | 1      | 2.00E-04 | NA | NA | 0.0013 | 0        |
| NR_039895    | MIR4741   | 0                 | 0.41163107678328  | 1      | 2.00E-04 | NA | NA | 0.0013 | 0        |
| NR_024388    | NCBP2-AS2 | 0                 | 0.41163107678328  | 1      | 2.00E-04 | NA | NA | 0.0013 | 0        |
| NM_148919    | PSMB8     | 0                 | 0.41163107678328  | 1      | 2.00E-04 | NA | NA | 0.0013 | 0        |
| NM_183234    | RAB27A    | 0.127669241253975 | 0.539300318037256 | 1      | 2.00E-04 | NA | NA | 0.0013 | 0        |
| NM_020247    | ADCK3     | 0                 | 0.412085415720127 | 1      | 2.00E-04 | NA | NA | 0.0013 | 0        |
| NM_001170791 | RMDN2     | 0                 | 0.412085415720127 | 1      | 2.00E-04 | NA | NA | 0.0013 | 0        |
| NM_001007169 | ZNF483    | 0                 | 0.412539754656974 | 1      | 2.00E-04 | NA | NA | 0.0013 | 0        |
| NM_133464    | ZNF483    | 0                 | 0.412539754656974 | 1      | 2.00E-04 | NA | NA | 0.0013 | 0        |
| NM_020732    | ARID1B    | 0                 | 0.412994093593821 | 1      | 2.00E-04 | NA | NA | 0.0013 | 0        |
| NM_017519    | ARID1B    | 0                 | 0.412994093593821 | 1      | 2.00E-04 | NA | NA | 0.0013 | 0        |
| NM_145754    | KIFC2     | 0                 | 0.413448432530668 | 1      | 2.00E-04 | NA | NA | 0.0013 | 0        |
| NM_005336    | HDLBP     | 0                 | 0.413448432530668 | 1      | 2.00E-04 | NA | NA | 0.0013 | 0        |
| NM_199050    | C2CD2     | 0                 | 0.413448432530668 | 1      | 2.00E-04 | NA | NA | 0.0013 | 0        |
| NM_001145520 | RAI14     | 0                 | 0.413902771467515 | 1      | 2.00E-04 | NA | NA | 0.0013 | 0        |
| NR_001297    | PCDHGB8P  | 0                 | 0.413902771467515 | 1      | 2.00E-04 | NA | NA | 0.0013 | 0        |
| NM_001200032 | HYAL3     | 0                 | 0.413902771467515 | 1      | 2.00E-04 | NA | NA | 0.0013 | 0        |
| NM_001200030 | HYAL3     | 0                 | 0.413902771467515 | 1      | 2.00E-04 | NA | NA | 0.0013 | 0        |
| NM_001200031 | HYAL3     | 0                 | 0.413902771467515 | 1      | 2.00E-04 | NA | NA | 0.0013 | 0        |
| NM_003549    | HYAL3     | 0                 | 0.413902771467515 | 1      | 2.00E-04 | NA | NA | 0.0013 | 0        |
| NM_138496    | CYHR1     | 0                 | 0.414357110404362 | 1      | 2.00E-04 | NA | NA | 0.0013 | 0        |
| NM_003133    | SRP9      | 0                 | 0.415265788278055 | 1      | 2.00E-04 | NA | NA | 0.0013 | 0        |
| NM_001130440 | SRP9      | 0                 | 0.415265788278055 | 1      | 2.00E-04 | NA | NA | 0.0013 | 0        |
| NM_004450    | ERH       | 0                 | 0.415265788278055 | 1      | 2.00E-04 | NA | NA | 0.0013 | 0        |
| NM_017868    | TTC12     | 0                 | 0.415720127214902 | 1      | 2.00E-04 | NA | NA | 0.0013 | 0        |
| NM_024576    | OGFRL1    | 0                 | 0.415720127214902 | 1      | 2.00E-04 | NA | NA | 0.0013 | 0        |
| NM_020191    | MRPS22    | 0                 | 0.416174466151749 | 1      | 2.00E-04 | NA | NA | 0.0013 | 0        |
| NR_046105    | MIR137HG  | 0                 | 0.416628805088596 | 1      | 2.00E-04 | NA | NA | 0.0013 | 0        |
| NR_028308    | BRE-AS1   | 0                 | 0.416628805088596 | 1      | 2.00E-04 | NA | NA | 0.0013 | 0        |
| NM_006848    | CCDC85B   | 0                 | 0.417083144025443 | 0.9998 | 6.00E-04 | NA | NA | 0.0039 | 1.00E-04 |
| NM_006196    | PCBP1     | 0                 | 0.417083144025443 | 1      | 2.00E-04 | NA | NA | 0.0013 | 0        |
| NM_022817    | PER2      | 0                 | 0.417083144025443 | 1      | 2.00E-04 | NA | NA | 0.0013 | 0        |
| NM_015478    | L3MBTL1   | 0                 | 0.41753748296229  | 1      | 2.00E-04 | NA | NA | 0.0013 | 0        |
| NM_001127493 | ANK2      | 0                 | 0.41753748296229  | 1      | 4.00E-04 | NA | NA | 0.0029 | 1.00E-04 |
| NM_018214    | LRRC1     | 0                 | 0.41753748296229  | 1      | 2.00E-04 | NA | NA | 0.0013 | 0        |
| NM_014680    | KIAA0100  | 0                 | 0.41753748296229  | 1      | 2.00E-04 | NA | NA | 0.0013 | 0        |
| NM_007192    | SUPT16H   | 0.167196728759655 | 0.585188550658791 | 1      | 2.00E-04 | NA | NA | 0.0013 | 0        |
| NM_018934    | PCDHB14   | 0                 | 0.417991821899137 | 1      | 2.00E-04 | NA | NA | 0.0013 | 0        |
| NM_021632    | ZNF350    | 0                 | 0.417991821899137 | 1      | 2.00E-04 | NA | NA | 0.0013 | 0        |
| NM_001006684 | TCEAL8    | 0                 | 0.417991821899137 | 1      | 2.00E-04 | NA | NA | 0.0013 | 0        |
| NM_153333    | TCEAL8    | 0                 | 0.417991821899137 | 1      | 2.00E-04 | NA | NA | 0.0013 | 0        |



|              |           |   |                   |   |          |    |    |        |          |
|--------------|-----------|---|-------------------|---|----------|----|----|--------|----------|
| NM_001165973 | NRG3      | 0 | 0.418900499772831 | 1 | 2.00E-04 | NA | NA | 0.0013 | 0        |
| NM_005052    | RAC3      | 0 | 0.418900499772831 | 1 | 6.00E-04 | NA | NA | 0.0039 | 1.00E-04 |
| NM_001012763 | GNRHR     | 0 | 0.418900499772831 | 1 | 2.00E-04 | NA | NA | 0.0013 | 0        |
| NM_000406    | GNRHR     | 0 | 0.418900499772831 | 1 | 2.00E-04 | NA | NA | 0.0013 | 0        |
| NM_170734    | BDNF      | 0 | 0.419354838709677 | 1 | 2.00E-04 | NA | NA | 0.0013 | 0        |
| NM_198128    | RNF138    | 0 | 0.419809177646524 | 1 | 2.00E-04 | NA | NA | 0.0013 | 0        |
| NM_001191324 | RNF138    | 0 | 0.419809177646524 | 1 | 2.00E-04 | NA | NA | 0.0013 | 0        |
| NM_001142370 | PTPN18    | 0 | 0.419809177646524 | 1 | 2.00E-04 | NA | NA | 0.0013 | 0        |
| NM_014369    | PTPN18    | 0 | 0.419809177646524 | 1 | 2.00E-04 | NA | NA | 0.0013 | 0        |
| NM_014143    | CD274     | 0 | 0.420263516583371 | 1 | 2.00E-04 | NA | NA | 0.0013 | 0        |
| NR_052005    | CD274     | 0 | 0.420263516583371 | 1 | 2.00E-04 | NA | NA | 0.0013 | 0        |
| NM_001267706 | CD274     | 0 | 0.420263516583371 | 1 | 2.00E-04 | NA | NA | 0.0013 | 0        |
| NM_001087    | AAMP      | 0 | 0.420263516583371 | 1 | 2.00E-04 | NA | NA | 0.0013 | 0        |
| NR_046200    | LOC400558 | 0 | 0.420717855520218 | 1 | 2.00E-04 | NA | NA | 0.0013 | 0        |
| NM_021959    | PPP1R11   | 0 | 0.420717855520218 | 1 | 2.00E-04 | NA | NA | 0.0013 | 0        |
| NM_016602    | CCR10     | 0 | 0.420717855520218 | 1 | 2.00E-04 | NA | NA | 0.0013 | 0        |
| NM_006808    | SEC61B    | 0 | 0.421172194457065 | 1 | 2.00E-04 | NA | NA | 0.0013 | 0        |
| NM_012139    | SERGEF    | 0 | 0.421172194457065 | 1 | 2.00E-04 | NA | NA | 0.0013 | 0        |
| NR_104040    | SERGEF    | 0 | 0.421172194457065 | 1 | 2.00E-04 | NA | NA | 0.0013 | 0        |
| NR_104041    | SERGEF    | 0 | 0.421172194457065 | 1 | 2.00E-04 | NA | NA | 0.0013 | 0        |
| NM_002387    | MCC       | 0 | 0.421172194457065 | 1 | 2.00E-04 | NA | NA | 0.0013 | 0        |
| NM_016531    | KLF3      | 0 | 0.421626533393912 | 1 | 2.00E-04 | NA | NA | 0.0013 | 0        |
| NM_134266    | SLC26A7   | 0 | 0.421626533393912 | 1 | 2.00E-04 | NA | NA | 0.0013 | 0        |
| NM_052832    | SLC26A7   | 0 | 0.421626533393912 | 1 | 2.00E-04 | NA | NA | 0.0013 | 0        |
| NM_182541    | TMEM31    | 0 | 0.422080872330759 | 1 | 2.00E-04 | NA | NA | 0.0013 | 0        |
| NM_144770    | RBM11     | 0 | 0.422535211267606 | 1 | 2.00E-04 | NA | NA | 0.0013 | 0        |
| NR_033925    | FENDRR    | 0 | 0.422535211267606 | 1 | 2.00E-04 | NA | NA | 0.0013 | 0        |
| NR_036444    | FENDRR    | 0 | 0.422535211267606 | 1 | 2.00E-04 | NA | NA | 0.0013 | 0        |
| NM_152376    | UBXN10    | 0 | 0.422989550204453 | 1 | 2.00E-04 | NA | NA | 0.0013 | 0        |
| NM_030594    | CPEB1     | 0 | 0.422989550204453 | 1 | 2.00E-04 | NA | NA | 0.0013 | 0        |
| NM_005496    | SMC4      | 0 | 0.423443889141299 | 1 | 2.00E-04 | NA | NA | 0.0013 | 0        |
| NM_015420    | DCAF13    | 0 | 0.423443889141299 | 1 | 2.00E-04 | NA | NA | 0.0013 | 0        |
| NM_004229    | MED14     | 0 | 0.423898228078146 | 1 | 2.00E-04 | NA | NA | 0.0013 | 0        |
| NM_000110    | DPYD      | 0 | 0.424352567014993 | 1 | 2.00E-04 | NA | NA | 0.0013 | 0        |
| NM_001160301 | DPYD      | 0 | 0.424352567014993 | 1 | 2.00E-04 | NA | NA | 0.0013 | 0        |
| NM_199204    | DHRS9     | 0 | 0.42480690595184  | 1 | 2.00E-04 | NA | NA | 0.0013 | 0        |
| NM_144726    | RNF145    | 0 | 0.42480690595184  | 1 | 2.00E-04 | NA | NA | 0.0013 | 0        |
| NM_001098812 | 39692     | 0 | 0.425261244888687 | 1 | 2.00E-04 | NA | NA | 0.0013 | 0        |
| NM_015146    | 39692     | 0 | 0.425261244888687 | 1 | 2.00E-04 | NA | NA | 0.0013 | 0        |
| NM_001098811 | 39692     | 0 | 0.425261244888687 | 1 | 2.00E-04 | NA | NA | 0.0013 | 0        |
| NM_001185077 | ARHGDI A  | 0 | 0.425715583825534 | 1 | 2.00E-04 | NA | NA | 0.0013 | 0        |
| NM_016591    | GCNT4     | 0 | 0.425715583825534 | 1 | 2.00E-04 | NA | NA | 0.0013 | 0        |
| NM_018664    | BATF3     | 0 | 0.426169922762381 | 1 | 2.00E-04 | NA | NA | 0.0013 | 0        |
| NM_000809    | GABRA4    | 0 | 0.426169922762381 | 1 | 2.00E-04 | NA | NA | 0.0013 | 0        |

|              |                  |   |                   |        |          |    |    |        |          |
|--------------|------------------|---|-------------------|--------|----------|----|----|--------|----------|
| NR_038337    | <i>OSER1-AS1</i> | 0 | 0.426624261699228 | 1      | 2.00E-04 | NA | NA | 0.0013 | 0        |
| NM_001769    | <i>CD9</i>       | 0 | 0.427532939572921 | 1      | 2.00E-04 | NA | NA | 0.0013 | 0        |
| NR_038338    | <i>OSER1-AS1</i> | 0 | 0.428441617446615 | 1      | 2.00E-04 | NA | NA | 0.0013 | 0        |
| NM_006037    | <i>HDAC4</i>     | 0 | 0.428441617446615 | 1      | 2.00E-04 | NA | NA | 0.0013 | 0        |
| NM_000436    | <i>OXCT1</i>     | 0 | 0.428895956383462 | 1      | 2.00E-04 | NA | NA | 0.0013 | 0        |
| NR_033933    | <i>GOLGA8T</i>   | 0 | 0.429350295320309 | 1      | 2.00E-04 | NA | NA | 0.0013 | 0        |
| NM_198215    | <i>FAM13C</i>    | 0 | 0.429350295320309 | 1      | 2.00E-04 | NA | NA | 0.0013 | 0        |
| NM_001166698 | <i>FAM13C</i>    | 0 | 0.429350295320309 | 1      | 2.00E-04 | NA | NA | 0.0013 | 0        |
| NM_001001971 | <i>FAM13C</i>    | 0 | 0.429350295320309 | 1      | 2.00E-04 | NA | NA | 0.0013 | 0        |
| NM_174899    | <i>FBXO36</i>    | 0 | 0.429804634257156 | 1      | 2.00E-04 | NA | NA | 0.0013 | 0        |
| NM_025195    | <i>TRIB1</i>     | 0 | 0.429804634257156 | 1      | 2.00E-04 | NA | NA | 0.0013 | 0        |
| NM_003956    | <i>CH25H</i>     | 0 | 0.429804634257156 | 1      | 2.00E-04 | NA | NA | 0.0013 | 0        |
| NM_000640    | <i>IL13RA2</i>   | 0 | 0.429804634257156 | 1      | 2.00E-04 | NA | NA | 0.0013 | 0        |
| NM_003670    | <i>BHLHE40</i>   | 0 | 0.430258973194003 | 1      | 2.00E-04 | NA | NA | 0.0013 | 0        |
| NM_001243885 | <i>TOB1</i>      | 0 | 0.430258973194003 | 1      | 2.00E-04 | NA | NA | 0.0013 | 0        |
| NM_005749    | <i>TOB1</i>      | 0 | 0.430258973194003 | 1      | 2.00E-04 | NA | NA | 0.0013 | 0        |
| NM_002806    | <i>PSMC6</i>     | 0 | 0.43071331213085  | 1      | 2.00E-04 | NA | NA | 0.0013 | 0        |
| NR_039785    | <i>MIR4642</i>   | 0 | 0.43071331213085  | 1      | 2.00E-04 | NA | NA | 0.0013 | 0        |
| NM_004236    | <i>COPS2</i>     | 0 | 0.43071331213085  | 1      | 2.00E-04 | NA | NA | 0.0013 | 0        |
| NM_001143887 | <i>COPS2</i>     | 0 | 0.43071331213085  | 1      | 2.00E-04 | NA | NA | 0.0013 | 0        |
| NM_001003827 | <i>TRIM34</i>    | 0 | 0.431167651067697 | 1      | 2.00E-04 | NA | NA | 0.0013 | 0        |
| NM_024496    | <i>IRF2BPL</i>   | 0 | 0.431167651067697 | 1      | 2.00E-04 | NA | NA | 0.0013 | 0        |
| NM_006497    | <i>HIC1</i>      | 0 | 0.43207632894139  | 1      | 0.0018   | NA | NA | 0.0087 | 3.00E-04 |
| NM_001202545 | <i>CUX1</i>      | 0 | 0.43207632894139  | 1      | 2.00E-04 | NA | NA | 0.0013 | 0        |
| NM_001202544 | <i>CUX1</i>      | 0 | 0.43207632894139  | 1      | 2.00E-04 | NA | NA | 0.0013 | 0        |
| NM_181500    | <i>CUX1</i>      | 0 | 0.43207632894139  | 1      | 2.00E-04 | NA | NA | 0.0013 | 0        |
| NM_001913    | <i>CUX1</i>      | 0 | 0.43207632894139  | 1      | 2.00E-04 | NA | NA | 0.0013 | 0        |
| NM_001202543 | <i>CUX1</i>      | 0 | 0.43207632894139  | 1      | 2.00E-04 | NA | NA | 0.0013 | 0        |
| NM_000117    | <i>EMD</i>       | 0 | 0.43207632894139  | 1      | 0.0014   | NA | NA | 0.0087 | 2.00E-04 |
| NM_025104    | <i>DBF4B</i>     | 0 | 0.432530667878237 | 1      | 2.00E-04 | NA | NA | 0.0013 | 0        |
| NM_145663    | <i>DBF4B</i>     | 0 | 0.432530667878237 | 1      | 2.00E-04 | NA | NA | 0.0013 | 0        |
| NR_036623    | <i>DBF4B</i>     | 0 | 0.432530667878237 | 1      | 2.00E-04 | NA | NA | 0.0013 | 0        |
| NM_001122665 | <i>DDX3Y</i>     | 0 | 0.432985006815084 | 0.9926 | 0.0078   | NA | NA | 0.0539 | 0.0011   |
| NM_015596    | <i>KLK13</i>     | 0 | 0.432985006815084 | 1      | 2.00E-04 | NA | NA | 0.0013 | 0        |
| NM_022092    | <i>CHTF18</i>    | 0 | 0.433439345751931 | 1      | 2.00E-04 | NA | NA | 0.0013 | 0        |
| NM_014926    | <i>SLITRK3</i>   | 0 | 0.433439345751931 | 1      | 2.00E-04 | NA | NA | 0.0013 | 0        |
| NM_147163    | <i>PSMG2</i>     | 0 | 0.433893684688778 | 0.9956 | 0.0036   | NA | NA | 0.0173 | 5.00E-04 |
| NM_017567    | <i>NAGK</i>      | 0 | 0.434802362562472 | 1      | 6.00E-04 | NA | NA | 0.0039 | 1.00E-04 |
| NM_001128627 | <i>SPIRE1</i>    | 0 | 0.434802362562472 | 0.9938 | 0.0102   | NA | NA | 0.0539 | 0.0015   |
| NM_138782    | <i>FCHO2</i>     | 0 | 0.435256701499318 | 1      | 2.00E-04 | NA | NA | 0.0013 | 0        |
| NM_001146032 | <i>FCHO2</i>     | 0 | 0.435256701499318 | 1      | 2.00E-04 | NA | NA | 0.0013 | 0        |
| NM_138465    | <i>GLI4</i>      | 0 | 0.435256701499318 | 1      | 2.00E-04 | NA | NA | 0.0013 | 0        |
| NM_001200016 | <i>NAT6</i>      | 0 | 0.435256701499318 | 1      | 2.00E-04 | NA | NA | 0.0013 | 0        |
| NM_012191    | <i>NAT6</i>      | 0 | 0.435256701499318 | 1      | 2.00E-04 | NA | NA | 0.0013 | 0        |

|              |              |                    |                   |   |          |    |    |        |   |
|--------------|--------------|--------------------|-------------------|---|----------|----|----|--------|---|
| NM_003139    | SRPR         | 0                  | 0.436165379373012 | 1 | 2.00E-04 | NA | NA | 0.0013 | 0 |
| NM_001177842 | SRPR         | 0                  | 0.436165379373012 | 1 | 2.00E-04 | NA | NA | 0.0013 | 0 |
| NM_013304    | ZDHHC1       | 0                  | 0.436165379373012 | 1 | 2.00E-04 | NA | NA | 0.0013 | 0 |
| NM_016300    | ARPP21       | 0                  | 0.437074057246706 | 1 | 2.00E-04 | NA | NA | 0.0013 | 0 |
| NM_181844    | BCL6B        | 0                  | 0.437528396183553 | 1 | 2.00E-04 | NA | NA | 0.0013 | 0 |
| NR_045214    | LOC100507373 | 0                  | 0.437528396183553 | 1 | 2.00E-04 | NA | NA | 0.0013 | 0 |
| NM_018003    | UACA         | 0                  | 0.4379827351204   | 1 | 2.00E-04 | NA | NA | 0.0013 | 0 |
| NM_005911    | MAT2A        | 0                  | 0.438891412994094 | 1 | 2.00E-04 | NA | NA | 0.0013 | 0 |
| NM_001204827 | XPNPEP3      | 0                  | 0.43934575193094  | 1 | 2.00E-04 | NA | NA | 0.0013 | 0 |
| NM_022098    | XPNPEP3      | 0                  | 0.43934575193094  | 1 | 2.00E-04 | NA | NA | 0.0013 | 0 |
| NM_130446    | KLHL6        | 0                  | 0.43934575193094  | 1 | 2.00E-04 | NA | NA | 0.0013 | 0 |
| NR_036625    | VDAC1        | 0                  | 0.43934575193094  | 1 | 2.00E-04 | NA | NA | 0.0013 | 0 |
| NR_036624    | VDAC1        | 0                  | 0.43934575193094  | 1 | 2.00E-04 | NA | NA | 0.0013 | 0 |
| NM_006041    | HS3ST3B1     | 0                  | 0.439800090867787 | 1 | 2.00E-04 | NA | NA | 0.0013 | 0 |
| NM_032453    | ZNF527       | 0                  | 0.439800090867787 | 1 | 2.00E-04 | NA | NA | 0.0013 | 0 |
| NM_194429    | FGFR1OP      | 0                  | 0.439800090867787 | 1 | 2.00E-04 | NA | NA | 0.0013 | 0 |
| NM_007045    | FGFR1OP      | 0                  | 0.439800090867787 | 1 | 2.00E-04 | NA | NA | 0.0013 | 0 |
| NM_001278690 | FGFR1OP      | 0                  | 0.439800090867787 | 1 | 2.00E-04 | NA | NA | 0.0013 | 0 |
| NM_004592    | SFSWAP       | 0                  | 0.440254429804634 | 1 | 2.00E-04 | NA | NA | 0.0013 | 0 |
| NM_001261411 | SFSWAP       | 0                  | 0.440254429804634 | 1 | 2.00E-04 | NA | NA | 0.0013 | 0 |
| NM_001127598 | IGF2         | 0                  | 0.440254429804634 | 1 | 2.00E-04 | NA | NA | 0.0013 | 0 |
| NM_031909    | C1QTNF4      | 0                  | 0.440254429804634 | 1 | 2.00E-04 | NA | NA | 0.0013 | 0 |
| NM_015533    | DAK          | 0                  | 0.440708768741481 | 1 | 2.00E-04 | NA | NA | 0.0013 | 0 |
| NR_040078    | KIRREL3-AS3  | 0                  | 0.440708768741481 | 1 | 2.00E-04 | NA | NA | 0.0013 | 0 |
| NM_001256475 | THEGL        | 0                  | 0.440708768741481 | 1 | 2.00E-04 | NA | NA | 0.0013 | 0 |
| NM_033261    | IDI2         | 0                  | 0.440708768741481 | 1 | 2.00E-04 | NA | NA | 0.0013 | 0 |
| NM_001042559 | EIF4G2       | 0                  | 0.440708768741481 | 1 | 2.00E-04 | NA | NA | 0.0013 | 0 |
| NM_001418    | EIF4G2       | 0                  | 0.440708768741481 | 1 | 2.00E-04 | NA | NA | 0.0013 | 0 |
| NM_015004    | EXOSC7       | 0                  | 0.441163107678328 | 1 | 2.00E-04 | NA | NA | 0.0013 | 0 |
| NR_023353    | EXOSC7       | 0                  | 0.441163107678328 | 1 | 2.00E-04 | NA | NA | 0.0013 | 0 |
| NM_001161707 | KIRREL3      | 0                  | 0.441163107678328 | 1 | 2.00E-04 | NA | NA | 0.0013 | 0 |
| NM_032531    | KIRREL3      | 0                  | 0.441163107678328 | 1 | 2.00E-04 | NA | NA | 0.0013 | 0 |
| NM_004352    | CBLN1        | 0                  | 0.441163107678328 | 1 | 2.00E-04 | NA | NA | 0.0013 | 0 |
| NM_031885    | BBS2         | 0.0168105406633348 | 0.457973648341663 | 1 | 2.00E-04 | NA | NA | 0.0013 | 0 |
| NM_019644    | ANKRD7       | 0                  | 0.441617446615175 | 1 | 2.00E-04 | NA | NA | 0.0013 | 0 |
| NM_001278546 | NR6A1        | 0                  | 0.441617446615175 | 1 | 2.00E-04 | NA | NA | 0.0013 | 0 |
| NM_001489    | NR6A1        | 0                  | 0.441617446615175 | 1 | 2.00E-04 | NA | NA | 0.0013 | 0 |
| NM_033334    | NR6A1        | 0                  | 0.441617446615175 | 1 | 2.00E-04 | NA | NA | 0.0013 | 0 |
| NM_001098512 | PRKG1        | 0                  | 0.442071785552022 | 1 | 2.00E-04 | NA | NA | 0.0013 | 0 |
| NM_001282117 | RFX3         | 0                  | 0.442071785552022 | 1 | 2.00E-04 | NA | NA | 0.0013 | 0 |
| NM_001550    | IFRD1        | 0                  | 0.442526124488869 | 1 | 2.00E-04 | NA | NA | 0.0013 | 0 |
| NM_003924    | PHOX2B       | 0                  | 0.442526124488869 | 1 | 2.00E-04 | NA | NA | 0.0013 | 0 |
| NM_080681    | COL11A2      | 0                  | 0.442526124488869 | 1 | 2.00E-04 | NA | NA | 0.0013 | 0 |
| NM_080679    | COL11A2      | 0                  | 0.442526124488869 | 1 | 2.00E-04 | NA | NA | 0.0013 | 0 |

|              |           |                    |                   |        |          |    |    |        |        |
|--------------|-----------|--------------------|-------------------|--------|----------|----|----|--------|--------|
| NM_080680    | COL11A2   | 0                  | 0.442526124488869 | 1      | 2.00E-04 | NA | NA | 0.0013 | 0      |
| NM_001163771 | COL11A2   | 0                  | 0.442526124488869 | 1      | 2.00E-04 | NA | NA | 0.0013 | 0      |
| NM_001004755 | OR51L1    | 0.0218082689686506 | 0.464788732394366 | 1      | 2.00E-04 | NA | NA | 0.0013 | 0      |
| NM_002482    | NASP      | 0                  | 0.443434802362562 | 1      | 2.00E-04 | NA | NA | 0.0013 | 0      |
| NM_152298    | NASP      | 0                  | 0.443434802362562 | 1      | 2.00E-04 | NA | NA | 0.0013 | 0      |
| NM_001195193 | NASP      | 0                  | 0.443434802362562 | 1      | 2.00E-04 | NA | NA | 0.0013 | 0      |
| NM_012093    | AK5       | 0                  | 0.443434802362562 | 1      | 2.00E-04 | NA | NA | 0.0013 | 0      |
| NM_024082    | PRRG3     | 0                  | 0.443434802362562 | 1      | 2.00E-04 | NA | NA | 0.0013 | 0      |
| NM_144725    | TTC23L    | 0.0249886415265788 | 0.468423443889141 | 1      | 2.00E-04 | NA | NA | 0.0013 | 0      |
| NR_040254    | D21S2088E | 0                  | 0.443889141299409 | 1      | 2.00E-04 | NA | NA | 0.0013 | 0      |
| NR_002731    | HYALP1    | 0.127669241253975  | 0.571558382553385 | 1      | 2.00E-04 | NA | NA | 0.0013 | 0      |
| NM_016147    | PPME1     | 0                  | 0.444343480236256 | 1      | 2.00E-04 | NA | NA | 0.0013 | 0      |
| NM_001271593 | PPME1     | 0                  | 0.444343480236256 | 1      | 2.00E-04 | NA | NA | 0.0013 | 0      |
| NM_001130677 | C17orf96  | 0                  | 0.444343480236256 | 1      | 2.00E-04 | NA | NA | 0.0013 | 0      |
| NR_104015    | TMED1     | 0                  | 0.444797819173103 | 1      | 2.00E-04 | NA | NA | 0.0013 | 0      |
| NM_001193347 | MEF2C     | 0                  | 0.44525215810995  | 1      | 2.00E-04 | NA | NA | 0.0013 | 0      |
| NM_001131005 | MEF2C     | 0                  | 0.44525215810995  | 1      | 2.00E-04 | NA | NA | 0.0013 | 0      |
| NM_182626    | C2orf48   | 0                  | 0.445706497046797 | 1      | 2.00E-04 | NA | NA | 0.0013 | 0      |
| NM_006285    | TESK1     | 0                  | 0.445706497046797 | 1      | 2.00E-04 | NA | NA | 0.0013 | 0      |
| NM_001164502 | EIF4ENIF1 | 0                  | 0.445706497046797 | 1      | 2.00E-04 | NA | NA | 0.0013 | 0      |
| NM_019843    | EIF4ENIF1 | 0                  | 0.445706497046797 | 1      | 2.00E-04 | NA | NA | 0.0013 | 0      |
| NM_001017967 | MARVELD3  | 0                  | 0.446160835983644 | 1      | 2.00E-04 | NA | NA | 0.0013 | 0      |
| NM_052858    | MARVELD3  | 0                  | 0.446160835983644 | 1      | 2.00E-04 | NA | NA | 0.0013 | 0      |
| NM_001271329 | MARVELD3  | 0                  | 0.446160835983644 | 1      | 2.00E-04 | NA | NA | 0.0013 | 0      |
| NM_015368    | PANX1     | 0                  | 0.446615174920491 | 1      | 2.00E-04 | NA | NA | 0.0013 | 0      |
| NM_001146333 | SUMF2     | 0                  | 0.446615174920491 | 1      | 2.00E-04 | NA | NA | 0.0013 | 0      |
| NM_001130069 | SUMF2     | 0                  | 0.446615174920491 | 1      | 2.00E-04 | NA | NA | 0.0013 | 0      |
| NM_015411    | SUMF2     | 0                  | 0.446615174920491 | 1      | 2.00E-04 | NA | NA | 0.0013 | 0      |
| NM_001042469 | SUMF2     | 0                  | 0.446615174920491 | 1      | 2.00E-04 | NA | NA | 0.0013 | 0      |
| NM_001042470 | SUMF2     | 0                  | 0.446615174920491 | 1      | 2.00E-04 | NA | NA | 0.0013 | 0      |
| NM_001256271 | VSX1      | 0                  | 0.446615174920491 | 1      | 2.00E-04 | NA | NA | 0.0013 | 0      |
| NM_001256272 | VSX1      | 0                  | 0.446615174920491 | 1      | 2.00E-04 | NA | NA | 0.0013 | 0      |
| NM_014588    | VSX1      | 0                  | 0.446615174920491 | 1      | 2.00E-04 | NA | NA | 0.0013 | 0      |
| NM_199425    | VSX1      | 0                  | 0.446615174920491 | 1      | 2.00E-04 | NA | NA | 0.0013 | 0      |
| NR_045951    | VSX1      | 0                  | 0.446615174920491 | 1      | 2.00E-04 | NA | NA | 0.0013 | 0      |
| NR_045948    | VSX1      | 0                  | 0.446615174920491 | 1      | 2.00E-04 | NA | NA | 0.0013 | 0      |
| NR_028062    | PRKY      | 0                  | 0.447069513857338 | 1      | 2.00E-04 | NA | NA | 0.0013 | 0      |
| NM_001258453 | FBXO18    | 0                  | 0.447523852794184 | 1      | 2.00E-04 | NA | NA | 0.0013 | 0      |
| NM_178150    | FBXO18    | 0                  | 0.447523852794184 | 1      | 2.00E-04 | NA | NA | 0.0013 | 0      |
| NM_024944    | CHODL     | 0                  | 0.447523852794184 | 1      | 2.00E-04 | NA | NA | 0.0013 | 0      |
| NM_001004439 | ITGA11    | 0                  | 0.447978191731031 | 1      | 2.00E-04 | NA | NA | 0.0013 | 0      |
| NM_020787    | ZNF624    | 0                  | 0.447978191731031 | 1      | 2.00E-04 | NA | NA | 0.0013 | 0      |
| NM_017633    | FAM46A    | 0                  | 0.448432530667878 | 1      | 2.00E-04 | NA | NA | 0.0013 | 0      |
| NM_004712    | HGS       | 0.134938664243526  | 0.583825533848251 | 0.9916 | 0.0098   | NA | NA | 0.0539 | 0.0014 |

|              |           |                     |                   |   |          |    |    |        |   |
|--------------|-----------|---------------------|-------------------|---|----------|----|----|--------|---|
| NM_018423    | STYK1     | 0                   | 0.448886869604725 | 1 | 2.00E-04 | NA | NA | 0.0013 | 0 |
| NM_005258    | GCHFR     | 0                   | 0.449341208541572 | 1 | 2.00E-04 | NA | NA | 0.0013 | 0 |
| NM_017954    | CADPS2    | 0                   | 0.449341208541572 | 1 | 2.00E-04 | NA | NA | 0.0013 | 0 |
| NM_001167940 | CADPS2    | 0                   | 0.449341208541572 | 1 | 2.00E-04 | NA | NA | 0.0013 | 0 |
| NM_001009571 | CADPS2    | 0                   | 0.449341208541572 | 1 | 2.00E-04 | NA | NA | 0.0013 | 0 |
| NM_014950    | ZBTB1     | 0.00181735574738755 | 0.45115856428896  | 1 | 2.00E-04 | NA | NA | 0.0013 | 0 |
| NM_001123329 | ZBTB1     | 0.00181735574738755 | 0.45115856428896  | 1 | 2.00E-04 | NA | NA | 0.0013 | 0 |
| NM_020309    | SLC17A7   | 0                   | 0.450249886415266 | 1 | 2.00E-04 | NA | NA | 0.0013 | 0 |
| NM_001282879 | GGTLC2    | 0                   | 0.450704225352113 | 1 | 2.00E-04 | NA | NA | 0.0013 | 0 |
| NM_000615    | NCAM1     | 0                   | 0.45115856428896  | 1 | 2.00E-04 | NA | NA | 0.0013 | 0 |
| NM_001076682 | NCAM1     | 0                   | 0.45115856428896  | 1 | 2.00E-04 | NA | NA | 0.0013 | 0 |
| NM_181351    | NCAM1     | 0                   | 0.45115856428896  | 1 | 2.00E-04 | NA | NA | 0.0013 | 0 |
| NM_001242608 | NCAM1     | 0                   | 0.45115856428896  | 1 | 2.00E-04 | NA | NA | 0.0013 | 0 |
| NM_001242607 | NCAM1     | 0                   | 0.45115856428896  | 1 | 2.00E-04 | NA | NA | 0.0013 | 0 |
| NM_032848    | C12orf52  | 0                   | 0.451612903225806 | 1 | 2.00E-04 | NA | NA | 0.0013 | 0 |
| NM_001270629 | MED4      | 0                   | 0.452067242162653 | 1 | 2.00E-04 | NA | NA | 0.0013 | 0 |
| NM_014166    | MED4      | 0                   | 0.452067242162653 | 1 | 2.00E-04 | NA | NA | 0.0013 | 0 |
| NM_000668    | ADH1B     | 0                   | 0.452067242162653 | 1 | 2.00E-04 | NA | NA | 0.0013 | 0 |
| NM_001040875 | GDAP1     | 0                   | 0.4525215810995   | 1 | 2.00E-04 | NA | NA | 0.0013 | 0 |
| NR_046346    | GDAP1     | 0                   | 0.4525215810995   | 1 | 2.00E-04 | NA | NA | 0.0013 | 0 |
| NM_018972    | GDAP1     | 0                   | 0.4525215810995   | 1 | 2.00E-04 | NA | NA | 0.0013 | 0 |
| NM_001130100 | KIFC3     | 0                   | 0.453884597910041 | 1 | 2.00E-04 | NA | NA | 0.0013 | 0 |
| NM_005550    | KIFC3     | 0                   | 0.453884597910041 | 1 | 2.00E-04 | NA | NA | 0.0013 | 0 |
| NM_001284214 | TRIP12    | 0                   | 0.454793275783735 | 1 | 2.00E-04 | NA | NA | 0.0013 | 0 |
| NM_001284216 | TRIP12    | 0                   | 0.454793275783735 | 1 | 2.00E-04 | NA | NA | 0.0013 | 0 |
| NM_004238    | TRIP12    | 0                   | 0.454793275783735 | 1 | 2.00E-04 | NA | NA | 0.0013 | 0 |
| NM_001190810 | AGAP9     | 0                   | 0.455247614720582 | 1 | 2.00E-04 | NA | NA | 0.0013 | 0 |
| NR_104031    | MEF2C-AS1 | 0                   | 0.455701953657428 | 1 | 2.00E-04 | NA | NA | 0.0013 | 0 |
| NR_003509    | HSFY2     | 0                   | 0.455701953657428 | 1 | 2.00E-04 | NA | NA | 0.0013 | 0 |
| NM_153716    | HSFY2     | 0                   | 0.455701953657428 | 1 | 2.00E-04 | NA | NA | 0.0013 | 0 |
| NM_001271    | CHD2      | 0                   | 0.456156292594275 | 1 | 2.00E-04 | NA | NA | 0.0013 | 0 |
| NM_001042572 | CHD2      | 0                   | 0.456156292594275 | 1 | 2.00E-04 | NA | NA | 0.0013 | 0 |
| NM_001098206 | HNRNPF    | 0                   | 0.456156292594275 | 1 | 2.00E-04 | NA | NA | 0.0013 | 0 |
| NM_017771    | PXK       | 0                   | 0.456610631531122 | 1 | 2.00E-04 | NA | NA | 0.0013 | 0 |
| NM_021635    | PBOV1     | 0                   | 0.457064970467969 | 1 | 2.00E-04 | NA | NA | 0.0013 | 0 |
| NM_005930    | CTAGE5    | 0                   | 0.457519309404816 | 1 | 2.00E-04 | NA | NA | 0.0013 | 0 |
| NM_001247989 | CTAGE5    | 0                   | 0.457519309404816 | 1 | 2.00E-04 | NA | NA | 0.0013 | 0 |
| NM_203355    | CTAGE5    | 0                   | 0.457519309404816 | 1 | 2.00E-04 | NA | NA | 0.0013 | 0 |
| NM_001247990 | CTAGE5    | 0                   | 0.457519309404816 | 1 | 2.00E-04 | NA | NA | 0.0013 | 0 |
| NM_001042762 | FIGNL1    | 0                   | 0.457973648341663 | 1 | 2.00E-04 | NA | NA | 0.0013 | 0 |
| NM_022116    | FIGNL1    | 0                   | 0.457973648341663 | 1 | 2.00E-04 | NA | NA | 0.0013 | 0 |
| NM_002882    | RANBP1    | 0                   | 0.45842798727851  | 1 | 2.00E-04 | NA | NA | 0.0013 | 0 |
| NM_001278640 | RANBP1    | 0                   | 0.45842798727851  | 1 | 2.00E-04 | NA | NA | 0.0013 | 0 |
| NM_001278641 | RANBP1    | 0                   | 0.45842798727851  | 1 | 2.00E-04 | NA | NA | 0.0013 | 0 |

|              |              |   |                   |   |          |    |    |        |   |
|--------------|--------------|---|-------------------|---|----------|----|----|--------|---|
| NM_001165921 | SERPINF2     | 0 | 0.458882326215357 | 1 | 2.00E-04 | NA | NA | 0.0013 | 0 |
| NM_000934    | SERPINF2     | 0 | 0.458882326215357 | 1 | 2.00E-04 | NA | NA | 0.0013 | 0 |
| NM_006465    | ARID3B       | 0 | 0.459336665152204 | 1 | 2.00E-04 | NA | NA | 0.0013 | 0 |
| NM_181558    | RFC3         | 0 | 0.45979100408905  | 1 | 2.00E-04 | NA | NA | 0.0013 | 0 |
| NM_002915    | RFC3         | 0 | 0.45979100408905  | 1 | 2.00E-04 | NA | NA | 0.0013 | 0 |
| NM_015028    | TNIK         | 0 | 0.45979100408905  | 1 | 2.00E-04 | NA | NA | 0.0013 | 0 |
| NM_001161560 | TNIK         | 0 | 0.45979100408905  | 1 | 2.00E-04 | NA | NA | 0.0013 | 0 |
| NM_001161566 | TNIK         | 0 | 0.45979100408905  | 1 | 2.00E-04 | NA | NA | 0.0013 | 0 |
| NM_001161565 | TNIK         | 0 | 0.45979100408905  | 1 | 2.00E-04 | NA | NA | 0.0013 | 0 |
| NM_001161561 | TNIK         | 0 | 0.45979100408905  | 1 | 2.00E-04 | NA | NA | 0.0013 | 0 |
| NM_001161563 | TNIK         | 0 | 0.45979100408905  | 1 | 2.00E-04 | NA | NA | 0.0013 | 0 |
| NM_001161564 | TNIK         | 0 | 0.45979100408905  | 1 | 2.00E-04 | NA | NA | 0.0013 | 0 |
| NM_001161562 | TNIK         | 0 | 0.45979100408905  | 1 | 2.00E-04 | NA | NA | 0.0013 | 0 |
| NR_027767    | TNIK         | 0 | 0.45979100408905  | 1 | 2.00E-04 | NA | NA | 0.0013 | 0 |
| NM_134446    | CD99L2       | 0 | 0.460245343025897 | 1 | 2.00E-04 | NA | NA | 0.0013 | 0 |
| NM_001184808 | CD99L2       | 0 | 0.460245343025897 | 1 | 2.00E-04 | NA | NA | 0.0013 | 0 |
| NM_134445    | CD99L2       | 0 | 0.460245343025897 | 1 | 2.00E-04 | NA | NA | 0.0013 | 0 |
| NM_001242614 | CD99L2       | 0 | 0.460245343025897 | 1 | 2.00E-04 | NA | NA | 0.0013 | 0 |
| NM_031462    | CD99L2       | 0 | 0.460245343025897 | 1 | 2.00E-04 | NA | NA | 0.0013 | 0 |
| NM_004976    | KCNC1        | 0 | 0.460699681962744 | 1 | 2.00E-04 | NA | NA | 0.0013 | 0 |
| NM_001112741 | KCNC1        | 0 | 0.460699681962744 | 1 | 2.00E-04 | NA | NA | 0.0013 | 0 |
| NM_001144892 | FGF1         | 0 | 0.460699681962744 | 1 | 2.00E-04 | NA | NA | 0.0013 | 0 |
| NM_001257212 | FGF1         | 0 | 0.460699681962744 | 1 | 2.00E-04 | NA | NA | 0.0013 | 0 |
| NM_016306    | DNAJB11      | 0 | 0.461154020899591 | 1 | 2.00E-04 | NA | NA | 0.0013 | 0 |
| NR_039680    | MIR4470      | 0 | 0.461154020899591 | 1 | 2.00E-04 | NA | NA | 0.0013 | 0 |
| NM_001567    | INPPL1       | 0 | 0.461608359836438 | 1 | 2.00E-04 | NA | NA | 0.0013 | 0 |
| NM_002202    | ISL1         | 0 | 0.461608359836438 | 1 | 2.00E-04 | NA | NA | 0.0013 | 0 |
| NM_000234    | LIG1         | 0 | 0.461608359836438 | 1 | 2.00E-04 | NA | NA | 0.0013 | 0 |
| NR_027440    | LOC100272217 | 0 | 0.461608359836438 | 1 | 2.00E-04 | NA | NA | 0.0013 | 0 |
| NR_030159    | MIR484       | 0 | 0.462062698773285 | 1 | 2.00E-04 | NA | NA | 0.0013 | 0 |
| NM_001143979 | NDE1         | 0 | 0.462062698773285 | 1 | 2.00E-04 | NA | NA | 0.0013 | 0 |
| NM_032037    | TSSK6        | 0 | 0.462971376646979 | 1 | 2.00E-04 | NA | NA | 0.0013 | 0 |
| NM_033108    | HSFY1        | 0 | 0.463425715583826 | 1 | 2.00E-04 | NA | NA | 0.0013 | 0 |
| NM_018534    | NRP2         | 0 | 0.463880054520672 | 1 | 2.00E-04 | NA | NA | 0.0013 | 0 |
| NM_201279    | NRP2         | 0 | 0.463880054520672 | 1 | 2.00E-04 | NA | NA | 0.0013 | 0 |
| NM_003872    | NRP2         | 0 | 0.463880054520672 | 1 | 2.00E-04 | NA | NA | 0.0013 | 0 |
| NM_201267    | NRP2         | 0 | 0.463880054520672 | 1 | 2.00E-04 | NA | NA | 0.0013 | 0 |
| NM_201266    | NRP2         | 0 | 0.463880054520672 | 1 | 2.00E-04 | NA | NA | 0.0013 | 0 |
| NM_201264    | NRP2         | 0 | 0.463880054520672 | 1 | 2.00E-04 | NA | NA | 0.0013 | 0 |
| NM_001134380 | TBC1D5       | 0 | 0.464334393457519 | 1 | 2.00E-04 | NA | NA | 0.0013 | 0 |
| NM_152584    | HSFY1        | 0 | 0.464788732394366 | 1 | 2.00E-04 | NA | NA | 0.0013 | 0 |
| NR_003510    | HSFY1        | 0 | 0.464788732394366 | 1 | 2.00E-04 | NA | NA | 0.0013 | 0 |
| NM_001001877 | HSFY2        | 0 | 0.464788732394366 | 1 | 2.00E-04 | NA | NA | 0.0013 | 0 |
| NM_006002    | UCHL3        | 0 | 0.465243071331213 | 1 | 2.00E-04 | NA | NA | 0.0013 | 0 |

|              |           |   |                   |   |          |    |    |        |   |
|--------------|-----------|---|-------------------|---|----------|----|----|--------|---|
| NM_004389    | CTNNA2    | 0 | 0.465243071331213 | 1 | 2.00E-04 | NA | NA | 0.0013 | 0 |
| NM_001164883 | CTNNA2    | 0 | 0.465243071331213 | 1 | 2.00E-04 | NA | NA | 0.0013 | 0 |
| NM_001282597 | CTNNA2    | 0 | 0.465243071331213 | 1 | 2.00E-04 | NA | NA | 0.0013 | 0 |
| NM_030895    | ZNF696    | 0 | 0.46569741026806  | 1 | 2.00E-04 | NA | NA | 0.0013 | 0 |
| NM_004734    | DCLK1     | 0 | 0.466151749204907 | 1 | 2.00E-04 | NA | NA | 0.0013 | 0 |
| NM_001024808 | BCL7A     | 0 | 0.467060427078601 | 1 | 2.00E-04 | NA | NA | 0.0013 | 0 |
| NM_020993    | BCL7A     | 0 | 0.467060427078601 | 1 | 2.00E-04 | NA | NA | 0.0013 | 0 |
| NM_001168344 | RREB1     | 0 | 0.467060427078601 | 1 | 2.00E-04 | NA | NA | 0.0013 | 0 |
| NM_001244705 | CSAD      | 0 | 0.467060427078601 | 1 | 2.00E-04 | NA | NA | 0.0013 | 0 |
| NM_012301    | MAGI2     | 0 | 0.467060427078601 | 1 | 2.00E-04 | NA | NA | 0.0013 | 0 |
| NM_001050    | SSTR2     | 0 | 0.467514766015448 | 1 | 2.00E-04 | NA | NA | 0.0013 | 0 |
| NM_001202504 | CTDP1     | 0 | 0.467514766015448 | 1 | 2.00E-04 | NA | NA | 0.0013 | 0 |
| NM_021109    | TMSB4X    | 0 | 0.467514766015448 | 1 | 2.00E-04 | NA | NA | 0.0013 | 0 |
| NM_001679    | ATP1B3    | 0 | 0.468423443889141 | 1 | 2.00E-04 | NA | NA | 0.0013 | 0 |
| NM_001198    | PRDM1     | 0 | 0.468423443889141 | 1 | 2.00E-04 | NA | NA | 0.0013 | 0 |
| NR_102763    | GATA6-AS1 | 0 | 0.468423443889141 | 1 | 2.00E-04 | NA | NA | 0.0013 | 0 |
| NR_000005    | SNORD15A  | 0 | 0.468877782825988 | 1 | 2.00E-04 | NA | NA | 0.0013 | 0 |
| NM_175063    | EMC10     | 0 | 0.469332121762835 | 1 | 2.00E-04 | NA | NA | 0.0013 | 0 |
| NM_206538    | EMC10     | 0 | 0.469332121762835 | 1 | 2.00E-04 | NA | NA | 0.0013 | 0 |
| NM_005510    | DXO       | 0 | 0.469332121762835 | 1 | 2.00E-04 | NA | NA | 0.0013 | 0 |
| NM_001174166 | SLC16A6   | 0 | 0.469786460699682 | 1 | 2.00E-04 | NA | NA | 0.0013 | 0 |
| NM_004694    | SLC16A6   | 0 | 0.469786460699682 | 1 | 2.00E-04 | NA | NA | 0.0013 | 0 |
| NM_001164748 | RASSF8    | 0 | 0.470695138573376 | 1 | 2.00E-04 | NA | NA | 0.0013 | 0 |
| NM_007211    | RASSF8    | 0 | 0.470695138573376 | 1 | 2.00E-04 | NA | NA | 0.0013 | 0 |
| NM_001207069 | BZW1      | 0 | 0.471149477510223 | 1 | 2.00E-04 | NA | NA | 0.0013 | 0 |
| NM_001207068 | BZW1      | 0 | 0.471149477510223 | 1 | 2.00E-04 | NA | NA | 0.0013 | 0 |
| NM_020147    | THAP10    | 0 | 0.471149477510223 | 1 | 2.00E-04 | NA | NA | 0.0013 | 0 |
| NM_018056    | TMEM39B   | 0 | 0.47160381644707  | 1 | 2.00E-04 | NA | NA | 0.0013 | 0 |
| NM_001199268 | DGKZ      | 0 | 0.47160381644707  | 1 | 2.00E-04 | NA | NA | 0.0013 | 0 |
| NM_003646    | DGKZ      | 0 | 0.47160381644707  | 1 | 2.00E-04 | NA | NA | 0.0013 | 0 |
| NM_001199267 | DGKZ      | 0 | 0.47160381644707  | 1 | 2.00E-04 | NA | NA | 0.0013 | 0 |
| NM_001199266 | DGKZ      | 0 | 0.47160381644707  | 1 | 2.00E-04 | NA | NA | 0.0013 | 0 |
| NM_014117    | C16orf72  | 0 | 0.47160381644707  | 1 | 2.00E-04 | NA | NA | 0.0013 | 0 |
| NM_152310    | ELOVL3    | 0 | 0.472058155383916 | 1 | 2.00E-04 | NA | NA | 0.0013 | 0 |
| NM_018723    | RBFOX1    | 0 | 0.472512494320763 | 1 | 2.00E-04 | NA | NA | 0.0013 | 0 |
| NM_001142333 | RBFOX1    | 0 | 0.472512494320763 | 1 | 2.00E-04 | NA | NA | 0.0013 | 0 |
| NM_004248    | PRLHR     | 0 | 0.472512494320763 | 1 | 2.00E-04 | NA | NA | 0.0013 | 0 |
| NM_003222    | TFAP2C    | 0 | 0.47296683325761  | 1 | 2.00E-04 | NA | NA | 0.0013 | 0 |
| NM_001184718 | TIPARP    | 0 | 0.47296683325761  | 1 | 2.00E-04 | NA | NA | 0.0013 | 0 |
| NM_174944    | TSSK4     | 0 | 0.473875511131304 | 1 | 2.00E-04 | NA | NA | 0.0013 | 0 |
| NM_001184739 | TSSK4     | 0 | 0.473875511131304 | 1 | 2.00E-04 | NA | NA | 0.0013 | 0 |
| NM_052928    | SMYD4     | 0 | 0.474329850068151 | 1 | 2.00E-04 | NA | NA | 0.0013 | 0 |
| NM_003242    | TGFBR2    | 0 | 0.474784189004998 | 1 | 2.00E-04 | NA | NA | 0.0013 | 0 |
| NM_001024847 | TGFBR2    | 0 | 0.474784189004998 | 1 | 2.00E-04 | NA | NA | 0.0013 | 0 |

|              |          |   |                   |   |          |    |    |        |          |
|--------------|----------|---|-------------------|---|----------|----|----|--------|----------|
| NM_001256024 | ARHGAP22 | 0 | 0.474784189004998 | 1 | 2.00E-04 | NA | NA | 0.0013 | 0        |
| NM_021226    | ARHGAP22 | 0 | 0.474784189004998 | 1 | 2.00E-04 | NA | NA | 0.0013 | 0        |
| NM_024075    | TSEN34   | 0 | 0.475238527941845 | 1 | 2.00E-04 | NA | NA | 0.0013 | 0        |
| NM_001282333 | TSEN34   | 0 | 0.475238527941845 | 1 | 2.00E-04 | NA | NA | 0.0013 | 0        |
| NM_001029954 | CDNF     | 0 | 0.475692866878692 | 1 | 2.00E-04 | NA | NA | 0.0013 | 0        |
| NM_001135598 | CLHC1    | 0 | 0.475692866878692 | 1 | 2.00E-04 | NA | NA | 0.0013 | 0        |
| NM_002036    | DARC     | 0 | 0.476147205815538 | 1 | 2.00E-04 | NA | NA | 0.0013 | 0        |
| NM_182664    | RASSF5   | 0 | 0.476147205815538 | 1 | 2.00E-04 | NA | NA | 0.0013 | 0        |
| NM_182663    | RASSF5   | 0 | 0.476147205815538 | 1 | 2.00E-04 | NA | NA | 0.0013 | 0        |
| NM_022456    | RAB3IP   | 0 | 0.476147205815538 | 1 | 2.00E-04 | NA | NA | 0.0013 | 0        |
| NM_175624    | RAB3IP   | 0 | 0.476147205815538 | 1 | 2.00E-04 | NA | NA | 0.0013 | 0        |
| NR_103519    | RAB3IP   | 0 | 0.476147205815538 | 1 | 2.00E-04 | NA | NA | 0.0013 | 0        |
| NM_001135648 | PTPRK    | 0 | 0.476147205815538 | 1 | 2.00E-04 | NA | NA | 0.0013 | 0        |
| NM_002844    | PTPRK    | 0 | 0.476147205815538 | 1 | 2.00E-04 | NA | NA | 0.0013 | 0        |
| NM_004300    | ACP1     | 0 | 0.476601544752385 | 1 | 2.00E-04 | NA | NA | 0.0013 | 0        |
| NM_001040649 | ACP1     | 0 | 0.476601544752385 | 1 | 2.00E-04 | NA | NA | 0.0013 | 0        |
| NM_007099    | ACP1     | 0 | 0.476601544752385 | 1 | 2.00E-04 | NA | NA | 0.0013 | 0        |
| NR_024080    | ACP1     | 0 | 0.476601544752385 | 1 | 2.00E-04 | NA | NA | 0.0013 | 0        |
| NM_199440    | HSPD1    | 0 | 0.476601544752385 | 1 | 2.00E-04 | NA | NA | 0.0013 | 0        |
| NM_153218    | LACC1    | 0 | 0.477055883689232 | 1 | 2.00E-04 | NA | NA | 0.0013 | 0        |
| NR_104226    | SH3YL1   | 0 | 0.477055883689232 | 1 | 2.00E-04 | NA | NA | 0.0013 | 0        |
| NM_181501    | ITGA1    | 0 | 0.477510222626079 | 1 | 2.00E-04 | NA | NA | 0.0013 | 0        |
| NM_015946    | PELO     | 0 | 0.477510222626079 | 1 | 2.00E-04 | NA | NA | 0.0013 | 0        |
| NM_003902    | FUBP1    | 0 | 0.477510222626079 | 1 | 2.00E-04 | NA | NA | 0.0013 | 0        |
| NM_001172664 | RAB40C   | 0 | 0.477964561562926 | 1 | 2.00E-04 | NA | NA | 0.0013 | 0        |
| NM_001122951 | DARC     | 0 | 0.47887323943662  | 1 | 2.00E-04 | NA | NA | 0.0013 | 0        |
| NM_004043    | ASMT     | 0 | 0.47887323943662  | 1 | 2.00E-04 | NA | NA | 0.0013 | 0        |
| NR_031729    | MIR1908  | 0 | 0.479781917310313 | 1 | 2.00E-04 | NA | NA | 0.0013 | 0        |
| NM_001199758 | MTHFS    | 0 | 0.479781917310313 | 1 | 2.00E-04 | NA | NA | 0.0013 | 0        |
| NR_034041    | SRSF1    | 0 | 0.48023625624716  | 1 | 2.00E-04 | NA | NA | 0.0013 | 0        |
| NM_001078166 | SRSF1    | 0 | 0.48023625624716  | 1 | 2.00E-04 | NA | NA | 0.0013 | 0        |
| NM_006924    | SRSF1    | 0 | 0.48023625624716  | 1 | 2.00E-04 | NA | NA | 0.0013 | 0        |
| NM_145333    | MAP3K7   | 0 | 0.48023625624716  | 1 | 2.00E-04 | NA | NA | 0.0013 | 0        |
| NM_145332    | MAP3K7   | 0 | 0.48023625624716  | 1 | 2.00E-04 | NA | NA | 0.0013 | 0        |
| NM_145331    | MAP3K7   | 0 | 0.48023625624716  | 1 | 2.00E-04 | NA | NA | 0.0013 | 0        |
| NM_003188    | MAP3K7   | 0 | 0.48023625624716  | 1 | 2.00E-04 | NA | NA | 0.0013 | 0        |
| NM_004379    | CREB1    | 0 | 0.481144934120854 | 1 | 2.00E-04 | NA | NA | 0.0013 | 0        |
| NM_134442    | CREB1    | 0 | 0.481144934120854 | 1 | 2.00E-04 | NA | NA | 0.0013 | 0        |
| NM_005754    | G3BP1    | 0 | 0.481144934120854 | 1 | 0.002    | NA | NA | 0.0087 | 3.00E-04 |
| NM_198395    | G3BP1    | 0 | 0.481144934120854 | 1 | 0.0024   | NA | NA | 0.0162 | 4.00E-04 |
| NR_038835    | MNX1-AS1 | 0 | 0.482053611994548 | 1 | 2.00E-04 | NA | NA | 0.0013 | 0        |
| NM_020196    | XAB2     | 0 | 0.482053611994548 | 1 | 2.00E-04 | NA | NA | 0.0013 | 0        |
| NM_001451    | FOXF1    | 0 | 0.482507950931395 | 1 | 2.00E-04 | NA | NA | 0.0013 | 0        |
| NM_001281503 | SLITRK1  | 0 | 0.482962289868242 | 1 | 2.00E-04 | NA | NA | 0.0013 | 0        |



|              |           |   |                   |   |          |    |    |        |   |
|--------------|-----------|---|-------------------|---|----------|----|----|--------|---|
| NM_052910    | SLITRK1   | 0 | 0.482962289868242 | 1 | 2.00E-04 | NA | NA | 0.0013 | 0 |
| NM_001165255 | MXN1      | 0 | 0.482962289868242 | 1 | 2.00E-04 | NA | NA | 0.0013 | 0 |
| NM_016049    | EMC9      | 0 | 0.483416628805089 | 1 | 2.00E-04 | NA | NA | 0.0013 | 0 |
| NR_038339    | OSER1-AS1 | 0 | 0.483870967741935 | 1 | 2.00E-04 | NA | NA | 0.0013 | 0 |
| NR_027392    | INTS4L2   | 0 | 0.483870967741935 | 1 | 2.00E-04 | NA | NA | 0.0013 | 0 |
| NM_004745    | DLGAP2    | 0 | 0.483870967741935 | 1 | 2.00E-04 | NA | NA | 0.0013 | 0 |
| NM_001277161 | DLGAP2    | 0 | 0.483870967741935 | 1 | 2.00E-04 | NA | NA | 0.0013 | 0 |
| NM_001258415 | ARHGAP20  | 0 | 0.483870967741935 | 1 | 2.00E-04 | NA | NA | 0.0013 | 0 |
| NM_031895    | CACNG8    | 0 | 0.484325306678782 | 1 | 2.00E-04 | NA | NA | 0.0013 | 0 |
| NM_001922    | DCT       | 0 | 0.484325306678782 | 1 | 2.00E-04 | NA | NA | 0.0013 | 0 |
| NM_001129889 | DCT       | 0 | 0.484325306678782 | 1 | 2.00E-04 | NA | NA | 0.0013 | 0 |
| NM_002201    | ISG20     | 0 | 0.484779645615629 | 1 | 2.00E-04 | NA | NA | 0.0013 | 0 |
| NM_004969    | IDE       | 0 | 0.485688323489323 | 1 | 2.00E-04 | NA | NA | 0.0013 | 0 |
| NM_181742    | ORC4      | 0 | 0.48614266242617  | 1 | 2.00E-04 | NA | NA | 0.0013 | 0 |
| NM_001278622 | RAD17     | 0 | 0.486597001363017 | 1 | 2.00E-04 | NA | NA | 0.0013 | 0 |
| NM_001018076 | NR3C1     | 0 | 0.487051340299864 | 1 | 2.00E-04 | NA | NA | 0.0013 | 0 |
| NM_001018088 | VPS13C    | 0 | 0.487505679236711 | 1 | 2.00E-04 | NA | NA | 0.0013 | 0 |
| NM_018080    | VPS13C    | 0 | 0.487505679236711 | 1 | 2.00E-04 | NA | NA | 0.0013 | 0 |
| NM_020821    | VPS13C    | 0 | 0.487505679236711 | 1 | 2.00E-04 | NA | NA | 0.0013 | 0 |
| NM_017684    | VPS13C    | 0 | 0.487505679236711 | 1 | 2.00E-04 | NA | NA | 0.0013 | 0 |
| NM_014452    | TNFRSF21  | 0 | 0.487505679236711 | 1 | 2.00E-04 | NA | NA | 0.0013 | 0 |
| NM_018908    | PCDHA5    | 0 | 0.487960018173557 | 1 | 2.00E-04 | NA | NA | 0.0013 | 0 |
| NM_031501    | PCDHA5    | 0 | 0.487960018173557 | 1 | 2.00E-04 | NA | NA | 0.0013 | 0 |
| NM_000539    | RHO       | 0 | 0.488414357110404 | 1 | 2.00E-04 | NA | NA | 0.0013 | 0 |
| NR_073103    | ITGA2     | 0 | 0.488414357110404 | 1 | 2.00E-04 | NA | NA | 0.0013 | 0 |
| NR_073106    | ITGA2     | 0 | 0.488414357110404 | 1 | 2.00E-04 | NA | NA | 0.0013 | 0 |
| NR_073104    | ITGA2     | 0 | 0.488414357110404 | 1 | 2.00E-04 | NA | NA | 0.0013 | 0 |
| NM_002203    | ITGA2     | 0 | 0.488414357110404 | 1 | 2.00E-04 | NA | NA | 0.0013 | 0 |
| NR_073107    | ITGA2     | 0 | 0.488414357110404 | 1 | 2.00E-04 | NA | NA | 0.0013 | 0 |
| NR_073105    | ITGA2     | 0 | 0.488414357110404 | 1 | 2.00E-04 | NA | NA | 0.0013 | 0 |
| NM_001190945 | TRAF1     | 0 | 0.488414357110404 | 1 | 2.00E-04 | NA | NA | 0.0013 | 0 |
| NM_018140    | CEP72     | 0 | 0.488868696047251 | 1 | 2.00E-04 | NA | NA | 0.0013 | 0 |
| NM_001207062 | C22orf23  | 0 | 0.488868696047251 | 1 | 2.00E-04 | NA | NA | 0.0013 | 0 |
| NM_032561    | C22orf23  | 0 | 0.488868696047251 | 1 | 2.00E-04 | NA | NA | 0.0013 | 0 |
| NM_020482    | FHL5      | 0 | 0.489323034984098 | 1 | 2.00E-04 | NA | NA | 0.0013 | 0 |
| NM_001170807 | FHL5      | 0 | 0.489323034984098 | 1 | 2.00E-04 | NA | NA | 0.0013 | 0 |
| NM_001127713 | ATL1      | 0 | 0.489777373920945 | 1 | 2.00E-04 | NA | NA | 0.0013 | 0 |
| NM_001934    | DLX4      | 0 | 0.489777373920945 | 1 | 2.00E-04 | NA | NA | 0.0013 | 0 |
| NM_001172131 | HCK       | 0 | 0.489777373920945 | 1 | 2.00E-04 | NA | NA | 0.0013 | 0 |
| NM_001172129 | HCK       | 0 | 0.489777373920945 | 1 | 2.00E-04 | NA | NA | 0.0013 | 0 |
| NM_001172130 | HCK       | 0 | 0.489777373920945 | 1 | 2.00E-04 | NA | NA | 0.0013 | 0 |
| NM_001172132 | HCK       | 0 | 0.489777373920945 | 1 | 2.00E-04 | NA | NA | 0.0013 | 0 |
| NM_002110    | HCK       | 0 | 0.489777373920945 | 1 | 2.00E-04 | NA | NA | 0.0013 | 0 |
| NM_001172133 | HCK       | 0 | 0.489777373920945 | 1 | 2.00E-04 | NA | NA | 0.0013 | 0 |

|              |              |                     |                   |   |          |    |    |        |          |
|--------------|--------------|---------------------|-------------------|---|----------|----|----|--------|----------|
| NM_001193282 | LOC402160    | 0                   | 0.489777373920945 | 1 | 2.00E-04 | NA | NA | 0.0013 | 0        |
| NM_032310    | C9orf89      | 0                   | 0.490231712857792 | 1 | 2.00E-04 | NA | NA | 0.0013 | 0        |
| NM_000111    | SLC26A3      | 0                   | 0.490231712857792 | 1 | 2.00E-04 | NA | NA | 0.0013 | 0        |
| NM_001204364 | FAM24B       | 0                   | 0.490686051794639 | 1 | 2.00E-04 | NA | NA | 0.0013 | 0        |
| NM_152644    | FAM24B       | 0                   | 0.490686051794639 | 1 | 2.00E-04 | NA | NA | 0.0013 | 0        |
| NR_037915    | FAM24B-CUZD1 | 0                   | 0.490686051794639 | 1 | 2.00E-04 | NA | NA | 0.0013 | 0        |
| NR_037911    | FAM24B       | 0                   | 0.490686051794639 | 1 | 2.00E-04 | NA | NA | 0.0013 | 0        |
| NR_026877    | MGC2889      | 0                   | 0.492049068605179 | 1 | 2.00E-04 | NA | NA | 0.0013 | 0        |
| NM_015343    | CTDNEP1      | 0                   | 0.492503407542026 | 1 | 2.00E-04 | NA | NA | 0.0013 | 0        |
| NM_014046    | MRPS18B      | 0                   | 0.492957746478873 | 1 | 2.00E-04 | NA | NA | 0.0013 | 0        |
| NM_032849    | MEDAG        | 0.00999545661063153 | 0.503407542026352 | 1 | 2.00E-04 | NA | NA | 0.0013 | 0        |
| NM_000834    | GRIN2B       | 0                   | 0.493866424352567 | 1 | 2.00E-04 | NA | NA | 0.0013 | 0        |
| NM_004031    | IRF7         | 0                   | 0.494775102226261 | 1 | 2.00E-04 | NA | NA | 0.0013 | 0        |
| NM_001572    | IRF7         | 0                   | 0.494775102226261 | 1 | 2.00E-04 | NA | NA | 0.0013 | 0        |
| NM_004029    | IRF7         | 0                   | 0.494775102226261 | 1 | 2.00E-04 | NA | NA | 0.0013 | 0        |
| NM_133179    | XAGE3        | 0                   | 0.494775102226261 | 1 | 2.00E-04 | NA | NA | 0.0013 | 0        |
| NM_203356    | CTAGE5       | 0                   | 0.495229441163108 | 1 | 2.00E-04 | NA | NA | 0.0013 | 0        |
| NM_001247988 | CTAGE5       | 0                   | 0.495229441163108 | 1 | 2.00E-04 | NA | NA | 0.0013 | 0        |
| NR_038943    | ADD3-AS1     | 0                   | 0.495229441163108 | 1 | 2.00E-04 | NA | NA | 0.0013 | 0        |
| NM_014755    | SERTAD2      | 0                   | 0.495229441163108 | 1 | 2.00E-04 | NA | NA | 0.0013 | 0        |
| NM_001204267 | GABRA4       | 0                   | 0.495229441163108 | 1 | 2.00E-04 | NA | NA | 0.0013 | 0        |
| NM_001204266 | GABRA4       | 0                   | 0.495229441163108 | 1 | 2.00E-04 | NA | NA | 0.0013 | 0        |
| NM_001007189 | IGIP         | 0                   | 0.495683780099955 | 1 | 2.00E-04 | NA | NA | 0.0013 | 0        |
| NM_021179    | CCDC181      | 0                   | 0.495683780099955 | 1 | 2.00E-04 | NA | NA | 0.0013 | 0        |
| NM_014891    | PDAP1        | 0                   | 0.495683780099955 | 1 | 2.00E-04 | NA | NA | 0.0013 | 0        |
| NM_002242    | KCNJ13       | 0                   | 0.496138119036801 | 1 | 2.00E-04 | NA | NA | 0.0013 | 0        |
| NM_001172416 | KCNJ13       | 0                   | 0.496138119036801 | 1 | 2.00E-04 | NA | NA | 0.0013 | 0        |
| NM_001172417 | KCNJ13       | 0                   | 0.496138119036801 | 1 | 2.00E-04 | NA | NA | 0.0013 | 0        |
| NM_018186    | C1orf112     | 0                   | 0.496592457973648 | 1 | 2.00E-04 | NA | NA | 0.0013 | 0        |
| NM_003039    | SLC2A5       | 0                   | 0.496592457973648 | 1 | 2.00E-04 | NA | NA | 0.0013 | 0        |
| NM_001135585 | SLC2A5       | 0                   | 0.496592457973648 | 1 | 2.00E-04 | NA | NA | 0.0013 | 0        |
| NM_201532    | DGKZ         | 0                   | 0.497046796910495 | 1 | 2.00E-04 | NA | NA | 0.0013 | 0        |
| NR_029714    | MIR320A      | 0                   | 0.497046796910495 | 1 | 2.00E-04 | NA | NA | 0.0013 | 0        |
| NM_005274    | GNG5         | 0                   | 0.497501135847342 | 1 | 2.00E-04 | NA | NA | 0.0013 | 0        |
| NM_015072    | TTL5         | 0                   | 0.497955474784189 | 1 | 2.00E-04 | NA | NA | 0.0013 | 0        |
| NR_029373    | LEF1-AS1     | 0                   | 0.497955474784189 | 1 | 2.00E-04 | NA | NA | 0.0013 | 0        |
| NR_038351    | ENO1-AS1     | 0                   | 0.498864152657883 | 1 | 2.00E-04 | NA | NA | 0.0013 | 0        |
| NM_144643    | SCLT1        | 0                   | 0.49931849159473  | 1 | 4.00E-04 | NA | NA | 0.0029 | 1.00E-04 |
| NR_024365    | PP12613      | 0                   | 0.500227169468423 | 1 | 2.00E-04 | NA | NA | 0.0013 | 0        |
| NM_145061    | SKA3         | 0                   | 0.501135847342117 | 1 | 2.00E-04 | NA | NA | 0.0013 | 0        |
| NM_001166017 | SKA3         | 0                   | 0.501135847342117 | 1 | 2.00E-04 | NA | NA | 0.0013 | 0        |
| NR_027503    | LOC100133050 | 0                   | 0.501590186278964 | 1 | 2.00E-04 | NA | NA | 0.0013 | 0        |
| NM_173563    | FAM217A      | 0                   | 0.501590186278964 | 1 | 2.00E-04 | NA | NA | 0.0013 | 0        |
| NM_025004    | CCDC15       | 0                   | 0.502498864152658 | 1 | 2.00E-04 | NA | NA | 0.0013 | 0        |

|              |              |   |                   |   |          |    |    |        |   |
|--------------|--------------|---|-------------------|---|----------|----|----|--------|---|
| NM_031420    | MRPL9        | 0 | 0.502498864152658 | 1 | 2.00E-04 | NA | NA | 0.0013 | 0 |
| NM_001166057 | PEPD         | 0 | 0.502498864152658 | 1 | 2.00E-04 | NA | NA | 0.0013 | 0 |
| NM_001166056 | PEPD         | 0 | 0.502498864152658 | 1 | 2.00E-04 | NA | NA | 0.0013 | 0 |
| NM_000285    | PEPD         | 0 | 0.502498864152658 | 1 | 2.00E-04 | NA | NA | 0.0013 | 0 |
| NM_001253801 | ZNF331       | 0 | 0.502953203089505 | 1 | 2.00E-04 | NA | NA | 0.0013 | 0 |
| NR_102741    | LINC01024    | 0 | 0.502953203089505 | 1 | 2.00E-04 | NA | NA | 0.0013 | 0 |
| NR_102740    | LINC01024    | 0 | 0.502953203089505 | 1 | 2.00E-04 | NA | NA | 0.0013 | 0 |
| NR_102739    | LINC01024    | 0 | 0.502953203089505 | 1 | 2.00E-04 | NA | NA | 0.0013 | 0 |
| NM_198966    | PTHLH        | 0 | 0.503407542026352 | 1 | 2.00E-04 | NA | NA | 0.0013 | 0 |
| NM_198964    | PTHLH        | 0 | 0.503407542026352 | 1 | 2.00E-04 | NA | NA | 0.0013 | 0 |
| NM_000051    | ATM          | 0 | 0.504770558836892 | 1 | 2.00E-04 | NA | NA | 0.0013 | 0 |
| NM_001136479 | ANP32E       | 0 | 0.504770558836892 | 1 | 2.00E-04 | NA | NA | 0.0013 | 0 |
| NM_013358    | PADI1        | 0 | 0.505679236710586 | 1 | 2.00E-04 | NA | NA | 0.0013 | 0 |
| NR_003607    | HSFY1P1      | 0 | 0.505679236710586 | 1 | 2.00E-04 | NA | NA | 0.0013 | 0 |
| NM_023918    | TAS2R8       | 0 | 0.507042253521127 | 1 | 2.00E-04 | NA | NA | 0.0013 | 0 |
| NM_015091    | FAM179B      | 0 | 0.507950931394821 | 1 | 2.00E-04 | NA | NA | 0.0013 | 0 |
| NM_005222    | DLX6         | 0 | 0.507950931394821 | 1 | 2.00E-04 | NA | NA | 0.0013 | 0 |
| NM_003272    | GPR137B      | 0 | 0.508405270331667 | 1 | 2.00E-04 | NA | NA | 0.0013 | 0 |
| NM_021955    | GNGT1        | 0 | 0.508859609268514 | 1 | 2.00E-04 | NA | NA | 0.0013 | 0 |
| NM_001143775 | CTDNBP1      | 0 | 0.508859609268514 | 1 | 2.00E-04 | NA | NA | 0.0013 | 0 |
| NM_203370    | FAM212A      | 0 | 0.509313948205361 | 1 | 2.00E-04 | NA | NA | 0.0013 | 0 |
| NM_001127176 | MRO          | 0 | 0.509313948205361 | 1 | 2.00E-04 | NA | NA | 0.0013 | 0 |
| NM_001127175 | MRO          | 0 | 0.509313948205361 | 1 | 2.00E-04 | NA | NA | 0.0013 | 0 |
| NM_031939    | MRO          | 0 | 0.509313948205361 | 1 | 2.00E-04 | NA | NA | 0.0013 | 0 |
| NM_001204102 | CASC1        | 0 | 0.509768287142208 | 1 | 2.00E-04 | NA | NA | 0.0013 | 0 |
| NM_001204101 | CASC1        | 0 | 0.509768287142208 | 1 | 2.00E-04 | NA | NA | 0.0013 | 0 |
| NM_001082973 | CASC1        | 0 | 0.509768287142208 | 1 | 2.00E-04 | NA | NA | 0.0013 | 0 |
| NM_001082972 | CASC1        | 0 | 0.509768287142208 | 1 | 2.00E-04 | NA | NA | 0.0013 | 0 |
| NM_018272    | CASC1        | 0 | 0.509768287142208 | 1 | 2.00E-04 | NA | NA | 0.0013 | 0 |
| NM_024589    | ROGDI        | 0 | 0.509768287142208 | 1 | 2.00E-04 | NA | NA | 0.0013 | 0 |
| NR_046480    | ROGDI        | 0 | 0.509768287142208 | 1 | 2.00E-04 | NA | NA | 0.0013 | 0 |
| NM_001034852 | SMOC1        | 0 | 0.511131303952749 | 1 | 2.00E-04 | NA | NA | 0.0013 | 0 |
| NM_022137    | SMOC1        | 0 | 0.511131303952749 | 1 | 2.00E-04 | NA | NA | 0.0013 | 0 |
| NM_001258417 | ARHGAP20     | 0 | 0.511131303952749 | 1 | 2.00E-04 | NA | NA | 0.0013 | 0 |
| NM_020809    | ARHGAP20     | 0 | 0.511131303952749 | 1 | 2.00E-04 | NA | NA | 0.0013 | 0 |
| NR_024481    | FAM205B      | 0 | 0.511131303952749 | 1 | 2.00E-04 | NA | NA | 0.0013 | 0 |
| NM_001171909 | CXorf40A     | 0 | 0.511585642889596 | 1 | 2.00E-04 | NA | NA | 0.0013 | 0 |
| NM_001142522 | FBX05        | 0 | 0.511585642889596 | 1 | 2.00E-04 | NA | NA | 0.0013 | 0 |
| NM_005921    | MAP3K1       | 0 | 0.512039981826443 | 1 | 2.00E-04 | NA | NA | 0.0013 | 0 |
| NR_037870    | LOC100131825 | 0 | 0.512494320763289 | 1 | 2.00E-04 | NA | NA | 0.0013 | 0 |
| NM_014753    | BMS1         | 0 | 0.513402998636983 | 1 | 2.00E-04 | NA | NA | 0.0013 | 0 |
| NM_000813    | GABRB2       | 0 | 0.513402998636983 | 1 | 2.00E-04 | NA | NA | 0.0013 | 0 |
| NM_021911    | GABRB2       | 0 | 0.513402998636983 | 1 | 2.00E-04 | NA | NA | 0.0013 | 0 |
| NM_001171195 | ELAVL2       | 0 | 0.51385733757383  | 1 | 2.00E-04 | NA | NA | 0.0013 | 0 |

|              |                     |                    |                   |   |          |    |    |        |   |
|--------------|---------------------|--------------------|-------------------|---|----------|----|----|--------|---|
| NM_153347    | <i>TMEM86A</i>      | 0                  | 0.514311676510677 | 1 | 2.00E-04 | NA | NA | 0.0013 | 0 |
| NM_001172665 | <i>RAB40C</i>       | 0                  | 0.514311676510677 | 1 | 2.00E-04 | NA | NA | 0.0013 | 0 |
| NM_001172666 | <i>RAB40C</i>       | 0                  | 0.514311676510677 | 1 | 2.00E-04 | NA | NA | 0.0013 | 0 |
| NM_021168    | <i>RAB40C</i>       | 0                  | 0.514311676510677 | 1 | 2.00E-04 | NA | NA | 0.0013 | 0 |
| NR_026751    | <i>ZNRD1-AS1</i>    | 0                  | 0.514766015447524 | 1 | 2.00E-04 | NA | NA | 0.0013 | 0 |
| NM_004094    | <i>EIF2S1</i>       | 0                  | 0.515220354384371 | 1 | 2.00E-04 | NA | NA | 0.0013 | 0 |
| NM_000798    | <i>DRD5</i>         | 0                  | 0.516583371194911 | 1 | 2.00E-04 | NA | NA | 0.0013 | 0 |
| NR_037504    | <i>MIR3939</i>      | 0                  | 0.516583371194911 | 1 | 2.00E-04 | NA | NA | 0.0013 | 0 |
| NM_152647    | <i>FAM227B</i>      | 0.0554293502953203 | 0.573375738300772 | 1 | 2.00E-04 | NA | NA | 0.0013 | 0 |
| NR_024347    | <i>LINC00304</i>    | 0.0581553839164016 | 0.576101771921854 | 1 | 2.00E-04 | NA | NA | 0.0013 | 0 |
| NM_006711    | <i>RNPS1</i>        | 0.104043616537937  | 0.622444343480236 | 1 | 2.00E-04 | NA | NA | 0.0013 | 0 |
| NM_030929    | <i>KAZALD1</i>      | 0                  | 0.518400726942299 | 1 | 2.00E-04 | NA | NA | 0.0013 | 0 |
| NR_038930    | <i>LOC100507250</i> | 0                  | 0.518400726942299 | 1 | 2.00E-04 | NA | NA | 0.0013 | 0 |
| NM_003833    | <i>MATN4</i>        | 0                  | 0.518400726942299 | 1 | 2.00E-04 | NA | NA | 0.0013 | 0 |
| NM_030590    | <i>MATN4</i>        | 0                  | 0.518400726942299 | 1 | 2.00E-04 | NA | NA | 0.0013 | 0 |
| NM_030592    | <i>MATN4</i>        | 0                  | 0.518400726942299 | 1 | 2.00E-04 | NA | NA | 0.0013 | 0 |
| NM_183373    | <i>PXDC1</i>        | 0                  | 0.518400726942299 | 1 | 2.00E-04 | NA | NA | 0.0013 | 0 |
| NM_001202474 | <i>PGR</i>          | 0                  | 0.518855065879146 | 1 | 2.00E-04 | NA | NA | 0.0013 | 0 |
| NM_001271161 | <i>PGR</i>          | 0                  | 0.518855065879146 | 1 | 2.00E-04 | NA | NA | 0.0013 | 0 |
| NR_073143    | <i>PGR</i>          | 0                  | 0.518855065879146 | 1 | 2.00E-04 | NA | NA | 0.0013 | 0 |
| NR_073142    | <i>PGR</i>          | 0                  | 0.518855065879146 | 1 | 2.00E-04 | NA | NA | 0.0013 | 0 |
| NR_073141    | <i>PGR</i>          | 0                  | 0.518855065879146 | 1 | 2.00E-04 | NA | NA | 0.0013 | 0 |
| NR_027251    | <i>LOC100129726</i> | 0                  | 0.519309404815993 | 1 | 2.00E-04 | NA | NA | 0.0013 | 0 |
| NM_001242948 | <i>EPDR1</i>        | 0                  | 0.519309404815993 | 1 | 2.00E-04 | NA | NA | 0.0013 | 0 |
| NM_001184986 | <i>NDUFC1</i>       | 0                  | 0.519309404815993 | 1 | 2.00E-04 | NA | NA | 0.0013 | 0 |
| NM_001184991 | <i>NDUFC1</i>       | 0                  | 0.519309404815993 | 1 | 2.00E-04 | NA | NA | 0.0013 | 0 |
| NM_002494    | <i>NDUFC1</i>       | 0                  | 0.519309404815993 | 1 | 2.00E-04 | NA | NA | 0.0013 | 0 |
| NM_001480    | <i>GALR1</i>        | 0                  | 0.51976374375284  | 1 | 2.00E-04 | NA | NA | 0.0013 | 0 |
| NM_005025    | <i>SERPINI1</i>     | 0                  | 0.520672421626533 | 1 | 2.00E-04 | NA | NA | 0.0013 | 0 |
| NM_001122752 | <i>SERPINI1</i>     | 0                  | 0.520672421626533 | 1 | 2.00E-04 | NA | NA | 0.0013 | 0 |
| NM_001005464 | <i>HIST2H3A</i>     | 0                  | 0.522489777373921 | 1 | 2.00E-04 | NA | NA | 0.0013 | 0 |
| NM_021059    | <i>HIST2H3C</i>     | 0                  | 0.522489777373921 | 1 | 2.00E-04 | NA | NA | 0.0013 | 0 |
| NM_181880    | <i>VCY1B</i>        | 0                  | 0.522489777373921 | 1 | 2.00E-04 | NA | NA | 0.0013 | 0 |
| NM_002234    | <i>KCNA5</i>        | 0.0336210813266697 | 0.556565197637438 | 1 | 2.00E-04 | NA | NA | 0.0013 | 0 |
| NM_021189    | <i>CADM3</i>        | 0                  | 0.523398455247615 | 1 | 2.00E-04 | NA | NA | 0.0013 | 0 |
| NM_031896    | <i>CACNG7</i>       | 0                  | 0.523398455247615 | 1 | 2.00E-04 | NA | NA | 0.0013 | 0 |
| NM_152392    | <i>AHSA2</i>        | 0                  | 0.523398455247615 | 1 | 2.00E-04 | NA | NA | 0.0013 | 0 |
| NM_014170    | <i>GTPBP8</i>       | 0                  | 0.523398455247615 | 1 | 2.00E-04 | NA | NA | 0.0013 | 0 |
| NM_138485    | <i>GTPBP8</i>       | 0                  | 0.523398455247615 | 1 | 2.00E-04 | NA | NA | 0.0013 | 0 |
| NM_054110    | <i>GALNT15</i>      | 0.10222626079055   | 0.626079054975011 | 1 | 2.00E-04 | NA | NA | 0.0013 | 0 |
| NM_001964    | <i>EGR1</i>         | 0                  | 0.523852794184462 | 1 | 2.00E-04 | NA | NA | 0.0013 | 0 |
| NM_175607    | <i>CNTN4</i>        | 0                  | 0.524307133121308 | 1 | 2.00E-04 | NA | NA | 0.0013 | 0 |
| NM_080717    | <i>TBX5</i>         | 0                  | 0.525215810995002 | 1 | 2.00E-04 | NA | NA | 0.0013 | 0 |
| NM_000192    | <i>TBX5</i>         | 0                  | 0.525215810995002 | 1 | 2.00E-04 | NA | NA | 0.0013 | 0 |

|              |           |                    |                   |   |          |    |    |        |          |
|--------------|-----------|--------------------|-------------------|---|----------|----|----|--------|----------|
| NM_001098502 | CHCHD4    | 0                  | 0.527941844616084 | 1 | 2.00E-04 | NA | NA | 0.0013 | 0        |
| NM_144636    | CHCHD4    | 0                  | 0.527941844616084 | 1 | 2.00E-04 | NA | NA | 0.0013 | 0        |
| NM_001039165 | MRGBPRE   | 0                  | 0.528850522489777 | 1 | 2.00E-04 | NA | NA | 0.0013 | 0        |
| NM_021220    | OVOL2     | 0                  | 0.528850522489777 | 1 | 2.00E-04 | NA | NA | 0.0013 | 0        |
| NM_001164501 | EIF4ENIF1 | 0                  | 0.528850522489777 | 1 | 2.00E-04 | NA | NA | 0.0013 | 0        |
| NM_001197294 | DPYSL3    | 0                  | 0.528850522489777 | 1 | 2.00E-04 | NA | NA | 0.0013 | 0        |
| NM_031283    | TCF7L1    | 0                  | 0.531122217174012 | 1 | 2.00E-04 | NA | NA | 0.0013 | 0        |
| NM_001005491 | OR10AG1   | 0                  | 0.531576556110859 | 1 | 2.00E-04 | NA | NA | 0.0013 | 0        |
| NM_003379    | EZR       | 0                  | 0.532030895047706 | 1 | 0.0026   | NA | NA | 0.0173 | 4.00E-04 |
| NR_033363    | ATG12     | 0                  | 0.532485233984552 | 1 | 2.00E-04 | NA | NA | 0.0013 | 0        |
| NR_033362    | ATG12     | 0                  | 0.532485233984552 | 1 | 2.00E-04 | NA | NA | 0.0013 | 0        |
| NM_001277783 | ATG12     | 0                  | 0.532485233984552 | 1 | 2.00E-04 | NA | NA | 0.0013 | 0        |
| NM_004707    | ATG12     | 0                  | 0.532485233984552 | 1 | 2.00E-04 | NA | NA | 0.0013 | 0        |
| NR_073603    | ATG12     | 0                  | 0.532485233984552 | 1 | 2.00E-04 | NA | NA | 0.0013 | 0        |
| NR_015360    | FLJ33630  | 0                  | 0.532939572921399 | 1 | 2.00E-04 | NA | NA | 0.0013 | 0        |
| NM_173487    | C4orf33   | 0                  | 0.53430258973194  | 1 | 2.00E-04 | NA | NA | 0.0013 | 0        |
| NM_000132    | F8        | 0                  | 0.53430258973194  | 1 | 2.00E-04 | NA | NA | 0.0013 | 0        |
| NM_152760    | SNX32     | 0                  | 0.534756928668787 | 1 | 2.00E-04 | NA | NA | 0.0013 | 0        |
| NM_006237    | POU4F1    | 0                  | 0.534756928668787 | 1 | 2.00E-04 | NA | NA | 0.0013 | 0        |
| NM_019063    | EML4      | 0                  | 0.535665606542481 | 1 | 2.00E-04 | NA | NA | 0.0013 | 0        |
| NM_001145076 | EML4      | 0                  | 0.535665606542481 | 1 | 2.00E-04 | NA | NA | 0.0013 | 0        |
| NM_006474    | PDPN      | 0                  | 0.537028623353021 | 1 | 2.00E-04 | NA | NA | 0.0013 | 0        |
| NM_198389    | PDPN      | 0                  | 0.537028623353021 | 1 | 2.00E-04 | NA | NA | 0.0013 | 0        |
| NM_181453    | GCC2      | 0                  | 0.537028623353021 | 1 | 2.00E-04 | NA | NA | 0.0013 | 0        |
| NR_028063    | GCC2      | 0                  | 0.537028623353021 | 1 | 2.00E-04 | NA | NA | 0.0013 | 0        |
| NM_015989    | CSAD      | 0                  | 0.537028623353021 | 1 | 2.00E-04 | NA | NA | 0.0013 | 0        |
| NM_000667    | ADH1A     | 0                  | 0.537028623353021 | 1 | 2.00E-04 | NA | NA | 0.0013 | 0        |
| NM_001466    | FZD2      | 0.0458882326215357 | 0.582916855974557 | 1 | 2.00E-04 | NA | NA | 0.0013 | 0        |
| NR_002779    | NUDT9P1   | 0                  | 0.537482962289868 | 1 | 2.00E-04 | NA | NA | 0.0013 | 0        |
| NM_173666    | DTWD2     | 0                  | 0.537482962289868 | 1 | 2.00E-04 | NA | NA | 0.0013 | 0        |
| NM_152570    | LINGO2    | 0                  | 0.537937301226715 | 1 | 2.00E-04 | NA | NA | 0.0013 | 0        |
| NM_001281494 | MSH6      | 0                  | 0.538391640163562 | 1 | 2.00E-04 | NA | NA | 0.0013 | 0        |
| NM_001127173 | CADM3     | 0                  | 0.54020899591095  | 1 | 2.00E-04 | NA | NA | 0.0013 | 0        |
| NM_001164372 | GPN3      | 0                  | 0.54020899591095  | 1 | 2.00E-04 | NA | NA | 0.0013 | 0        |
| NM_053067    | UBQLN1    | 0                  | 0.542935029532031 | 1 | 2.00E-04 | NA | NA | 0.0013 | 0        |
| NM_013438    | UBQLN1    | 0                  | 0.542935029532031 | 1 | 2.00E-04 | NA | NA | 0.0013 | 0        |
| NM_175075    | TDRP      | 0                  | 0.543843707405725 | 1 | 2.00E-04 | NA | NA | 0.0013 | 0        |
| NM_198041    | NUDT6     | 0                  | 0.545206724216265 | 1 | 2.00E-04 | NA | NA | 0.0013 | 0        |
| NR_037434    | MIR3661   | 0                  | 0.545661063153112 | 1 | 2.00E-04 | NA | NA | 0.0013 | 0        |
| NR_024526    | ARL6IP6   | 0                  | 0.546115402089959 | 1 | 2.00E-04 | NA | NA | 0.0013 | 0        |
| NM_152522    | ARL6IP6   | 0                  | 0.546115402089959 | 1 | 2.00E-04 | NA | NA | 0.0013 | 0        |
| NM_175875    | SIX5      | 0                  | 0.5474784189005   | 1 | 2.00E-04 | NA | NA | 0.0013 | 0        |
| NM_000188    | HK1       | 0                  | 0.547932757837347 | 1 | 2.00E-04 | NA | NA | 0.0013 | 0        |
| NM_007144    | PCGF2     | 0                  | 0.547932757837347 | 1 | 2.00E-04 | NA | NA | 0.0013 | 0        |

|              |            |                    |                   |   |          |    |    |        |   |
|--------------|------------|--------------------|-------------------|---|----------|----|----|--------|---|
| NM_003010    | MAP2K4     | 0                  | 0.548387096774194 | 1 | 2.00E-04 | NA | NA | 0.0013 | 0 |
| NM_001281435 | MAP2K4     | 0                  | 0.548387096774194 | 1 | 2.00E-04 | NA | NA | 0.0013 | 0 |
| NM_001242534 | MFSD11     | 0                  | 0.54884143571104  | 1 | 2.00E-04 | NA | NA | 0.0013 | 0 |
| NM_024504    | PRDM14     | 0                  | 0.549750113584734 | 1 | 2.00E-04 | NA | NA | 0.0013 | 0 |
| NM_001134999 | FERMT2     | 0                  | 0.550204452521581 | 1 | 2.00E-04 | NA | NA | 0.0013 | 0 |
| NM_006832    | FERMT2     | 0                  | 0.550204452521581 | 1 | 2.00E-04 | NA | NA | 0.0013 | 0 |
| NM_001135000 | FERMT2     | 0                  | 0.550204452521581 | 1 | 2.00E-04 | NA | NA | 0.0013 | 0 |
| NM_012183    | FOXO3      | 0                  | 0.550658791458428 | 1 | 2.00E-04 | NA | NA | 0.0013 | 0 |
| NM_001198665 | ARHGEF12   | 0                  | 0.551567469332122 | 1 | 2.00E-04 | NA | NA | 0.0013 | 0 |
| NM_015313    | ARHGEF12   | 0                  | 0.551567469332122 | 1 | 2.00E-04 | NA | NA | 0.0013 | 0 |
| NM_015401    | HDAC7      | 0                  | 0.552021808268969 | 1 | 2.00E-04 | NA | NA | 0.0013 | 0 |
| NM_001098416 | HDAC7      | 0                  | 0.552021808268969 | 1 | 2.00E-04 | NA | NA | 0.0013 | 0 |
| NM_016655    | GABPB1     | 0                  | 0.552476147205816 | 1 | 2.00E-04 | NA | NA | 0.0013 | 0 |
| NM_016654    | GABPB1     | 0                  | 0.552476147205816 | 1 | 2.00E-04 | NA | NA | 0.0013 | 0 |
| NM_002041    | GABPB1     | 0                  | 0.552476147205816 | 1 | 2.00E-04 | NA | NA | 0.0013 | 0 |
| NM_181427    | GABPB1     | 0                  | 0.552476147205816 | 1 | 2.00E-04 | NA | NA | 0.0013 | 0 |
| NM_005254    | GABPB1     | 0                  | 0.552476147205816 | 1 | 2.00E-04 | NA | NA | 0.0013 | 0 |
| NR_026891    | FLJ10038   | 0                  | 0.552476147205816 | 1 | 2.00E-04 | NA | NA | 0.0013 | 0 |
| NM_002945    | RPA1       | 0                  | 0.552930486142662 | 1 | 2.00E-04 | NA | NA | 0.0013 | 0 |
| NM_002959    | SORT1      | 0                  | 0.553384825079509 | 1 | 2.00E-04 | NA | NA | 0.0013 | 0 |
| NM_020300    | MGST1      | 0.0154475238527942 | 0.56928668786915  | 1 | 2.00E-04 | NA | NA | 0.0013 | 0 |
| NM_001260511 | MGST1      | 0.0154475238527942 | 0.56928668786915  | 1 | 2.00E-04 | NA | NA | 0.0013 | 0 |
| NM_001260512 | MGST1      | 0.0154475238527942 | 0.56928668786915  | 1 | 2.00E-04 | NA | NA | 0.0013 | 0 |
| NM_001267598 | MGST1      | 0.0154475238527942 | 0.56928668786915  | 1 | 2.00E-04 | NA | NA | 0.0013 | 0 |
| NR_048545    | MGST1      | 0.0154475238527942 | 0.56928668786915  | 1 | 2.00E-04 | NA | NA | 0.0013 | 0 |
| NM_022366    | TFB2M      | 0                  | 0.553839164016356 | 1 | 2.00E-04 | NA | NA | 0.0013 | 0 |
| NM_000358    | TGFBI      | 0                  | 0.555202180826897 | 1 | 2.00E-04 | NA | NA | 0.0013 | 0 |
| NM_174932    | BPIFC      | 0                  | 0.555202180826897 | 1 | 2.00E-04 | NA | NA | 0.0013 | 0 |
| NR_039825    | MIR4678    | 0                  | 0.556110858700591 | 1 | 2.00E-04 | NA | NA | 0.0013 | 0 |
| NM_001130406 | PRR20D     | 0                  | 0.557928214447978 | 1 | 2.00E-04 | NA | NA | 0.0013 | 0 |
| NM_014247    | RAPGEF2    | 0                  | 0.559291231258519 | 1 | 2.00E-04 | NA | NA | 0.0013 | 0 |
| NM_014167    | CCDC59     | 0                  | 0.56065424806906  | 1 | 2.00E-04 | NA | NA | 0.0013 | 0 |
| NM_145691    | ATPAF2     | 0                  | 0.56065424806906  | 1 | 2.00E-04 | NA | NA | 0.0013 | 0 |
| NM_004625    | WNT7A      | 0                  | 0.5620172648796   | 1 | 2.00E-04 | NA | NA | 0.0013 | 0 |
| NR_046217    | ZRANB2-AS2 | 0                  | 0.562471603816447 | 1 | 2.00E-04 | NA | NA | 0.0013 | 0 |
| NM_001010844 | IRAK1BP1   | 0                  | 0.562925942753294 | 1 | 2.00E-04 | NA | NA | 0.0013 | 0 |
| NM_052867    | NALCN      | 0                  | 0.564743298500682 | 1 | 2.00E-04 | NA | NA | 0.0013 | 0 |
| NM_001136156 | ZNF507     | 0                  | 0.565651976374375 | 1 | 2.00E-04 | NA | NA | 0.0013 | 0 |
| NM_014910    | ZNF507     | 0                  | 0.565651976374375 | 1 | 2.00E-04 | NA | NA | 0.0013 | 0 |
| NR_039624    | MIR4426    | 0                  | 0.565651976374375 | 1 | 2.00E-04 | NA | NA | 0.0013 | 0 |
| NM_018078    | LARP1B     | 0                  | 0.565651976374375 | 1 | 2.00E-04 | NA | NA | 0.0013 | 0 |
| NM_032239    | LARP1B     | 0                  | 0.565651976374375 | 1 | 2.00E-04 | NA | NA | 0.0013 | 0 |
| NM_178043    | LARP1B     | 0                  | 0.565651976374375 | 1 | 2.00E-04 | NA | NA | 0.0013 | 0 |
| NM_001278604 | LARP1B     | 0                  | 0.565651976374375 | 1 | 2.00E-04 | NA | NA | 0.0013 | 0 |

|              |              |                    |                   |        |          |    |    |        |          |
|--------------|--------------|--------------------|-------------------|--------|----------|----|----|--------|----------|
| NM_001145347 | ZNF576       | 0                  | 0.566106315311222 | 1      | 2.00E-04 | NA | NA | 0.0013 | 0        |
| NM_024327    | ZNF576       | 0                  | 0.566106315311222 | 1      | 2.00E-04 | NA | NA | 0.0013 | 0        |
| NR_024032    | LINC00474    | 0                  | 0.566106315311222 | 1      | 2.00E-04 | NA | NA | 0.0013 | 0        |
| NM_013368    | SERTAD3      | 0                  | 0.566560654248069 | 1      | 2.00E-04 | NA | NA | 0.0013 | 0        |
| NM_145791    | MGST1        | 0                  | 0.56928668786915  | 1      | 2.00E-04 | NA | NA | 0.0013 | 0        |
| NR_048547    | MGST1        | 0                  | 0.56928668786915  | 1      | 2.00E-04 | NA | NA | 0.0013 | 0        |
| NM_006662    | SRCAP        | 0                  | 0.56928668786915  | 1      | 4.00E-04 | NA | NA | 0.0029 | 1.00E-04 |
| NM_023008    | KRI1         | 0                  | 0.56928668786915  | 1      | 2.00E-04 | NA | NA | 0.0013 | 0        |
| NM_021926    | ALX4         | 0                  | 0.569741026805997 | 1      | 2.00E-04 | NA | NA | 0.0013 | 0        |
| NM_003658    | BARX2        | 0                  | 0.570649704679691 | 1      | 2.00E-04 | NA | NA | 0.0013 | 0        |
| NM_001144915 | FGFR2        | 0                  | 0.571104043616538 | 1      | 2.00E-04 | NA | NA | 0.0013 | 0        |
| NM_021100    | NFS1         | 0                  | 0.571558382553385 | 1      | 2.00E-04 | NA | NA | 0.0013 | 0        |
| NM_001198989 | NFS1         | 0                  | 0.571558382553385 | 1      | 2.00E-04 | NA | NA | 0.0013 | 0        |
| NR_037570    | NFS1         | 0                  | 0.571558382553385 | 1      | 2.00E-04 | NA | NA | 0.0013 | 0        |
| NM_198837    | ACACA        | 0                  | 0.572467060427079 | 1      | 2.00E-04 | NA | NA | 0.0013 | 0        |
| NM_198838    | ACACA        | 0                  | 0.572467060427079 | 1      | 2.00E-04 | NA | NA | 0.0013 | 0        |
| NR_033857    | LOC100288974 | 0                  | 0.576556110858701 | 1      | 2.00E-04 | NA | NA | 0.0013 | 0        |
| NM_000922    | PDE3B        | 0.0545206724216265 | 0.632894139027715 | 1      | 2.00E-04 | NA | NA | 0.0013 | 0        |
| NM_182810    | ATF4         | 0                  | 0.578827805542935 | 1      | 2.00E-04 | NA | NA | 0.0013 | 0        |
| NM_001675    | ATF4         | 0                  | 0.578827805542935 | 1      | 2.00E-04 | NA | NA | 0.0013 | 0        |
| NM_003192    | TBCC         | 0                  | 0.578827805542935 | 1      | 2.00E-04 | NA | NA | 0.0013 | 0        |
| NM_001128829 | CA1          | 0                  | 0.579736483416629 | 1      | 2.00E-04 | NA | NA | 0.0013 | 0        |
| NM_001128831 | CA1          | 0                  | 0.579736483416629 | 1      | 2.00E-04 | NA | NA | 0.0013 | 0        |
| NM_001738    | CA1          | 0                  | 0.579736483416629 | 1      | 2.00E-04 | NA | NA | 0.0013 | 0        |
| NM_001128830 | CA1          | 0                  | 0.579736483416629 | 1      | 2.00E-04 | NA | NA | 0.0013 | 0        |
| NR_033424    | DNAJA1P5     | 0                  | 0.581553839164016 | 1      | 2.00E-04 | NA | NA | 0.0013 | 0        |
| NM_020368    | UTP3         | 0                  | 0.581553839164016 | 1      | 2.00E-04 | NA | NA | 0.0013 | 0        |
| NR_026973    | HLA-F-AS1    | 0                  | 0.581553839164016 | 1      | 2.00E-04 | NA | NA | 0.0013 | 0        |
| NR_026972    | HLA-F-AS1    | 0                  | 0.581553839164016 | 1      | 2.00E-04 | NA | NA | 0.0013 | 0        |
| NM_002156    | HSPD1        | 0                  | 0.585642889595638 | 1      | 2.00E-04 | NA | NA | 0.0013 | 0        |
| NM_015267    | CUX2         | 0.0136301681054066 | 0.600181735574739 | 1      | 2.00E-04 | NA | NA | 0.0013 | 0        |
| NM_080664    | DTD2         | 0                  | 0.58836892321672  | 1      | 2.00E-04 | NA | NA | 0.0013 | 0        |
| NM_001040412 | C9orf131     | 0                  | 0.589277601090413 | 1      | 2.00E-04 | NA | NA | 0.0013 | 0        |
| NM_001040411 | C9orf131     | 0                  | 0.589277601090413 | 1      | 2.00E-04 | NA | NA | 0.0013 | 0        |
| NM_018269    | ADI1         | 0                  | 0.589277601090413 | 1      | 2.00E-04 | NA | NA | 0.0013 | 0        |
| NM_152385    | CLHC1        | 0                  | 0.589277601090413 | 1      | 2.00E-04 | NA | NA | 0.0013 | 0        |
| NM_001005195 | OR8B12       | 0                  | 0.590186278964107 | 1      | 2.00E-04 | NA | NA | 0.0013 | 0        |
| NM_006716    | DBF4         | 0                  | 0.591094956837801 | 1      | 2.00E-04 | NA | NA | 0.0013 | 0        |
| NM_001079514 | UBN1         | 0                  | 0.592003634711495 | 1      | 2.00E-04 | NA | NA | 0.0013 | 0        |
| NM_014830    | ZBTB39       | 0                  | 0.592912312585189 | 1      | 2.00E-04 | NA | NA | 0.0013 | 0        |
| NM_002448    | MSX1         | 0                  | 0.595184007269423 | 1      | 2.00E-04 | NA | NA | 0.0013 | 0        |
| NM_004660    | DDX3Y        | 0                  | 0.597001363016811 | 0.9994 | 0.001    | NA | NA | 0.0054 | 2.00E-04 |
| NM_003253    | TIAM1        | 0                  | 0.598818718764198 | 1      | 2.00E-04 | NA | NA | 0.0013 | 0        |
| NM_014978    | SORCS3       | 0                  | 0.601999091322126 | 1      | 2.00E-04 | NA | NA | 0.0013 | 0        |

|              |                   |   |                   |   |          |    |    |        |   |
|--------------|-------------------|---|-------------------|---|----------|----|----|--------|---|
| NM_004364    | <i>CEBPA</i>      | 0 | 0.603816447069514 | 1 | 2.00E-04 | NA | NA | 0.0013 | 0 |
| NM_012180    | <i>FBXO8</i>      | 0 | 0.607451158564289 | 1 | 2.00E-04 | NA | NA | 0.0013 | 0 |
| NM_022780    | <i>RMND5A</i>     | 0 | 0.609268514311677 | 1 | 2.00E-04 | NA | NA | 0.0013 | 0 |
| NM_182947    | <i>ARHGEF25</i>   | 0 | 0.61017719218537  | 1 | 2.00E-04 | NA | NA | 0.0013 | 0 |
| NR_046223    | <i>ARHGEF25</i>   | 0 | 0.61017719218537  | 1 | 2.00E-04 | NA | NA | 0.0013 | 0 |
| NR_103872    | <i>RAD51C</i>     | 0 | 0.611994547932758 | 1 | 2.00E-04 | NA | NA | 0.0013 | 0 |
| NM_058216    | <i>RAD51C</i>     | 0 | 0.611994547932758 | 1 | 2.00E-04 | NA | NA | 0.0013 | 0 |
| NR_103873    | <i>RAD51C</i>     | 0 | 0.611994547932758 | 1 | 2.00E-04 | NA | NA | 0.0013 | 0 |
| NM_002876    | <i>RAD51C</i>     | 0 | 0.611994547932758 | 1 | 2.00E-04 | NA | NA | 0.0013 | 0 |
| NM_020783    | <i>SYT4</i>       | 0 | 0.612903225806452 | 1 | 2.00E-04 | NA | NA | 0.0013 | 0 |
| NM_001693    | <i>ATP6V1B2</i>   | 0 | 0.616992276238074 | 1 | 2.00E-04 | NA | NA | 0.0013 | 0 |
| NM_001204269 | <i>KCNA2</i>      | 0 | 0.617900954111767 | 1 | 2.00E-04 | NA | NA | 0.0013 | 0 |
| NM_003910    | <i>BUD31</i>      | 0 | 0.618355293048614 | 1 | 2.00E-04 | NA | NA | 0.0013 | 0 |
| NM_007083    | <i>NUDT6</i>      | 0 | 0.618355293048614 | 1 | 2.00E-04 | NA | NA | 0.0013 | 0 |
| NM_001139510 | <i>ECHDC1</i>     | 0 | 0.618809631985461 | 1 | 2.00E-04 | NA | NA | 0.0013 | 0 |
| NM_001029865 | <i>DBX1</i>       | 0 | 0.622444343480236 | 1 | 2.00E-04 | NA | NA | 0.0013 | 0 |
| NM_004365    | <i>CETN3</i>      | 0 | 0.624261699227624 | 1 | 2.00E-04 | NA | NA | 0.0013 | 0 |
| NM_003081    | <i>SNAP25</i>     | 0 | 0.626079054975011 | 1 | 2.00E-04 | NA | NA | 0.0013 | 0 |
| NM_130811    | <i>SNAP25</i>     | 0 | 0.626079054975011 | 1 | 2.00E-04 | NA | NA | 0.0013 | 0 |
| NM_007276    | <i>CBX3</i>       | 0 | 0.626987732848705 | 1 | 2.00E-04 | NA | NA | 0.0013 | 0 |
| NM_024017    | <i>HOXB9</i>      | 0 | 0.626987732848705 | 1 | 2.00E-04 | NA | NA | 0.0013 | 0 |
| NM_152545    | <i>RASGEF1B</i>   | 0 | 0.627442071785552 | 1 | 2.00E-04 | NA | NA | 0.0013 | 0 |
| NM_001244698 | <i>ZFP36L1</i>    | 0 | 0.627896410722399 | 1 | 2.00E-04 | NA | NA | 0.0013 | 0 |
| NM_004926    | <i>ZFP36L1</i>    | 0 | 0.627896410722399 | 1 | 2.00E-04 | NA | NA | 0.0013 | 0 |
| NM_001038707 | <i>CDC42SE1</i>   | 0 | 0.63062244434348  | 1 | 2.00E-04 | NA | NA | 0.0013 | 0 |
| NM_020239    | <i>CDC42SE1</i>   | 0 | 0.63062244434348  | 1 | 2.00E-04 | NA | NA | 0.0013 | 0 |
| NM_170713    | <i>RASSF1</i>     | 0 | 0.63062244434348  | 1 | 2.00E-04 | NA | NA | 0.0013 | 0 |
| NM_001127648 | <i>GABRA1</i>     | 0 | 0.633348477964562 | 1 | 2.00E-04 | NA | NA | 0.0013 | 0 |
| NM_003933    | <i>BAIAP3</i>     | 0 | 0.635620172648796 | 1 | 2.00E-04 | NA | NA | 0.0013 | 0 |
| NM_002137    | <i>HNRNPA2B1</i>  | 0 | 0.635620172648796 | 1 | 2.00E-04 | NA | NA | 0.0013 | 0 |
| NM_031243    | <i>HNRNPA2B1</i>  | 0 | 0.635620172648796 | 1 | 2.00E-04 | NA | NA | 0.0013 | 0 |
| NM_015457    | <i>ZDHHC5</i>     | 0 | 0.638800545206724 | 1 | 2.00E-04 | NA | NA | 0.0013 | 0 |
| NM_000909    | <i>NPY1R</i>      | 0 | 0.639254884143571 | 1 | 2.00E-04 | NA | NA | 0.0013 | 0 |
| NM_018111    | <i>C19orf73</i>   | 0 | 0.641526578827806 | 1 | 2.00E-04 | NA | NA | 0.0013 | 0 |
| NR_045118    | <i>KCNIP2-AS1</i> | 0 | 0.647887323943662 | 1 | 2.00E-04 | NA | NA | 0.0013 | 0 |
| NR_024398    | <i>ZBED3-AS1</i>  | 0 | 0.648796001817356 | 1 | 2.00E-04 | NA | NA | 0.0013 | 0 |
| NM_001754    | <i>RUNX1</i>      | 0 | 0.649250340754203 | 1 | 2.00E-04 | NA | NA | 0.0013 | 0 |
| NM_016076    | <i>DES12</i>      | 0 | 0.650159018627896 | 1 | 2.00E-04 | NA | NA | 0.0013 | 0 |
| NM_014360    | <i>NKX2-8</i>     | 0 | 0.659700136301681 | 1 | 2.00E-04 | NA | NA | 0.0013 | 0 |
| NM_001242532 | <i>MFSD11</i>     | 0 | 0.661971830985915 | 1 | 2.00E-04 | NA | NA | 0.0013 | 0 |
| NM_001242537 | <i>MFSD11</i>     | 0 | 0.661971830985915 | 1 | 2.00E-04 | NA | NA | 0.0013 | 0 |
| NM_001242535 | <i>MFSD11</i>     | 0 | 0.661971830985915 | 1 | 2.00E-04 | NA | NA | 0.0013 | 0 |
| NM_001242533 | <i>MFSD11</i>     | 0 | 0.661971830985915 | 1 | 2.00E-04 | NA | NA | 0.0013 | 0 |
| NM_001242536 | <i>MFSD11</i>     | 0 | 0.661971830985915 | 1 | 2.00E-04 | NA | NA | 0.0013 | 0 |



|              |                     |   |                   |   |          |    |    |        |   |
|--------------|---------------------|---|-------------------|---|----------|----|----|--------|---|
| NM_024311    | <i>MFSD11</i>       | 0 | 0.661971830985915 | 1 | 2.00E-04 | NA | NA | 0.0013 | 0 |
| NM_020386    | <i>HRASLS</i>       | 0 | 0.663789186733303 | 1 | 2.00E-04 | NA | NA | 0.0013 | 0 |
| NR_024623    | <i>C21orf49</i>     | 0 | 0.668786915038619 | 1 | 2.00E-04 | NA | NA | 0.0013 | 0 |
| NR_024622    | <i>C21orf49</i>     | 0 | 0.668786915038619 | 1 | 2.00E-04 | NA | NA | 0.0013 | 0 |
| NM_001164373 | <i>GPN3</i>         | 0 | 0.671058609722853 | 1 | 2.00E-04 | NA | NA | 0.0013 | 0 |
| NM_016301    | <i>GPN3</i>         | 0 | 0.671058609722853 | 1 | 2.00E-04 | NA | NA | 0.0013 | 0 |
| NM_194448    | <i>CLEC4A</i>       | 0 | 0.672421626533394 | 1 | 2.00E-04 | NA | NA | 0.0013 | 0 |
| NM_194447    | <i>CLEC4A</i>       | 0 | 0.672421626533394 | 1 | 2.00E-04 | NA | NA | 0.0013 | 0 |
| NM_194450    | <i>CLEC4A</i>       | 0 | 0.672421626533394 | 1 | 2.00E-04 | NA | NA | 0.0013 | 0 |
| NM_016184    | <i>CLEC4A</i>       | 0 | 0.672421626533394 | 1 | 2.00E-04 | NA | NA | 0.0013 | 0 |
| NM_020319    | <i>ANKMY2</i>       | 0 | 0.678328032712403 | 1 | 2.00E-04 | NA | NA | 0.0013 | 0 |
| NM_003385    | <i>VSNL1</i>        | 0 | 0.680599727396638 | 1 | 2.00E-04 | NA | NA | 0.0013 | 0 |
| NM_181619    | <i>KRTAP21-1</i>    | 0 | 0.680599727396638 | 1 | 2.00E-04 | NA | NA | 0.0013 | 0 |
| NM_001184898 | <i>PHF8</i>         | 0 | 0.688777828259882 | 1 | 2.00E-04 | NA | NA | 0.0013 | 0 |
| NM_012177    | <i>FBXO5</i>        | 0 | 0.701953657428442 | 1 | 2.00E-04 | NA | NA | 0.0013 | 0 |
| NM_001190470 | <i>MTRNR2L2</i>     | 0 | 0.708314402544298 | 1 | 2.00E-04 | NA | NA | 0.0013 | 0 |
| NR_029378    | <i>LOC100289511</i> | 0 | 0.714675147660154 | 1 | 2.00E-04 | NA | NA | 0.0013 | 0 |
| NM_005575    | <i>LNPEP</i>        | 0 | 0.723307587460245 | 1 | 2.00E-04 | NA | NA | 0.0013 | 0 |
| NM_001242946 | <i>EPDR1</i>        | 0 | 0.728305315765561 | 1 | 2.00E-04 | NA | NA | 0.0013 | 0 |
| NM_017549    | <i>EPDR1</i>        | 0 | 0.728305315765561 | 1 | 2.00E-04 | NA | NA | 0.0013 | 0 |
| NM_001142704 | <i>FAM111B</i>      | 0 | 0.74738755111313  | 1 | 2.00E-04 | NA | NA | 0.0013 | 0 |
| NM_001142703 | <i>FAM111B</i>      | 0 | 0.74738755111313  | 1 | 2.00E-04 | NA | NA | 0.0013 | 0 |
| NM_198947    | <i>FAM111B</i>      | 0 | 0.74738755111313  | 1 | 2.00E-04 | NA | NA | 0.0013 | 0 |
| NM_001134876 | <i>C14orf80</i>     | 0 | 0.756019990913221 | 1 | 2.00E-04 | NA | NA | 0.0013 | 0 |
| NM_001134875 | <i>C14orf80</i>     | 0 | 0.756019990913221 | 1 | 2.00E-04 | NA | NA | 0.0013 | 0 |
| NM_152697    | <i>SLC44A5</i>      | 0 | 0.758291685597456 | 1 | 2.00E-04 | NA | NA | 0.0013 | 0 |
| NM_001130058 | <i>SLC44A5</i>      | 0 | 0.758291685597456 | 1 | 2.00E-04 | NA | NA | 0.0013 | 0 |
| NM_001161657 | <i>MYB</i>          | 0 | 0.769650159018628 | 1 | 2.00E-04 | NA | NA | 0.0013 | 0 |
| NM_005375    | <i>MYB</i>          | 0 | 0.769650159018628 | 1 | 2.00E-04 | NA | NA | 0.0013 | 0 |
| NM_001130172 | <i>MYB</i>          | 0 | 0.769650159018628 | 1 | 2.00E-04 | NA | NA | 0.0013 | 0 |
| NM_001130173 | <i>MYB</i>          | 0 | 0.769650159018628 | 1 | 2.00E-04 | NA | NA | 0.0013 | 0 |
| NM_001161660 | <i>MYB</i>          | 0 | 0.769650159018628 | 1 | 2.00E-04 | NA | NA | 0.0013 | 0 |
| NM_001161659 | <i>MYB</i>          | 0 | 0.769650159018628 | 1 | 2.00E-04 | NA | NA | 0.0013 | 0 |
| NM_001161656 | <i>MYB</i>          | 0 | 0.769650159018628 | 1 | 2.00E-04 | NA | NA | 0.0013 | 0 |
| NM_001161658 | <i>MYB</i>          | 0 | 0.769650159018628 | 1 | 2.00E-04 | NA | NA | 0.0013 | 0 |
| NM_007217    | <i>PDCD10</i>       | 0 | 0.776465243071331 | 1 | 2.00E-04 | NA | NA | 0.0013 | 0 |
| NM_017533    | <i>MYH4</i>         | 0 | 0.785552021808269 | 1 | 2.00E-04 | NA | NA | 0.0013 | 0 |
| NM_145859    | <i>PDCD10</i>       | 0 | 0.789641072239891 | 1 | 2.00E-04 | NA | NA | 0.0013 | 0 |
| NM_145860    | <i>PDCD10</i>       | 0 | 0.789641072239891 | 1 | 2.00E-04 | NA | NA | 0.0013 | 0 |
| NM_001273    | <i>CHD4</i>         | 0 | 0.792367105860972 | 1 | 2.00E-04 | NA | NA | 0.0013 | 0 |
| NM_007207    | <i>DUSP10</i>       | 0 | 0.798273512039982 | 1 | 2.00E-04 | NA | NA | 0.0013 | 0 |
| NM_144729    | <i>DUSP10</i>       | 0 | 0.798273512039982 | 1 | 2.00E-04 | NA | NA | 0.0013 | 0 |
| NR_001281    | <i>PCDHB18</i>      | 0 | 0.805997273966379 | 1 | 2.00E-04 | NA | NA | 0.0013 | 0 |
| NM_024089    | <i>KDEL1</i>        | 0 | 0.824170831440254 | 1 | 2.00E-04 | NA | NA | 0.0013 | 0 |

|              |                     |   |                   |   |          |    |    |        |   |
|--------------|---------------------|---|-------------------|---|----------|----|----|--------|---|
| NR_027439    | <i>LOC100272216</i> | 0 | 0.851431167651068 | 1 | 2.00E-04 | NA | NA | 0.0013 | 0 |
| NM_002840    | <i>PTPRF</i>        | 0 | 0.852339845524761 | 1 | 2.00E-04 | NA | NA | 0.0013 | 0 |
| NM_130440    | <i>PTPRF</i>        | 0 | 0.852339845524761 | 1 | 2.00E-04 | NA | NA | 0.0013 | 0 |
| NM_017892    | <i>PRPF40A</i>      | 0 | 0.852339845524761 | 1 | 2.00E-04 | NA | NA | 0.0013 | 0 |
| NR_033981    | <i>FLJ27354</i>     | 0 | 0.879145842798728 | 1 | 2.00E-04 | NA | NA | 0.0013 | 0 |
| NM_182594    | <i>ZNF454</i>       | 0 | 0.90368014538846  | 1 | 2.00E-04 | NA | NA | 0.0013 | 0 |
| NM_001178090 | <i>ZNF454</i>       | 0 | 0.90368014538846  | 1 | 2.00E-04 | NA | NA | 0.0013 | 0 |
| NM_001178089 | <i>ZNF454</i>       | 0 | 0.90368014538846  | 1 | 2.00E-04 | NA | NA | 0.0013 | 0 |
| NM_002922    | <i>RGS1</i>         | 0 | 0.915038618809632 | 1 | 2.00E-04 | NA | NA | 0.0013 | 0 |
| NM_015965    | <i>NDUFA13</i>      | 0 | 0.970013630168105 | 1 | 2.00E-04 | NA | NA | 0.0013 | 0 |
| NM_178311    | <i>GGTLC1</i>       | 0 | 1                 | 1 | 2.00E-04 | NA | NA | 0.0013 | 0 |

Table S3: Methylation data showing differential methylated transcripts between lean/overweight and obese subjects in SAT samples expressed by a ratio of hyper- and hypo-methylation per promoter. fdr/FDR= false discovery rate.

Supplementary Table 4

**Methylation in OVAT non-obese vs. obese**

| Transcript   | GeneName        | vis_in_obese      | vis_in_non-obese   | p_value_in_obese | p_value_in_non-obese | fdr_in_obese | Fdr_in_obese | fdr_in_non-obese | Fdr_in_non-obese |
|--------------|-----------------|-------------------|--------------------|------------------|----------------------|--------------|--------------|------------------|------------------|
| NM_001099338 | <i>NUTM2A</i>   | 1                 | 0                  | 2.00E-04         | 1                    | 0.0015       | 0            | NA               | NA               |
| NR_000016    | <i>SNORD36C</i> | 0.942298955020445 | 0                  | 2.00E-04         | 1                    | 0.0015       | 0            | NA               | NA               |
| NR_002448    | <i>SNORD36A</i> | 0.82916855974557  | 0                  | 2.00E-04         | 1                    | 0.0015       | 0            | NA               | NA               |
| NM_001145672 | <i>SORBS2</i>   | 0.819173103       | 0                  | 2.00E-04         | 1                    | 0.0015       | 0            | NA               | NA               |
| NM_001145671 | <i>SORBS2</i>   | 0.819173103134939 | 0                  | 2.00E-04         | 1                    | 0.0015       | 0            | NA               | NA               |
| NM_022359    | <i>PDE4DIP</i>  | 0.811903680145388 | 0                  | 2.00E-04         | 1                    | 0.0015       | 0            | NA               | NA               |
| NR_027279    | <i>USP17L6P</i> | 0.797819173103135 | 0                  | 0.006            | 0.9968               | 0.0655       | 0.0011       | NA               | NA               |
| NM_005042    | <i>PRH2</i>     | 0.761017719218537 | 0                  | 2.00E-04         | 1                    | 0.0015       | 0            | NA               | NA               |
| NM_001110213 | <i>PRH2</i>     | 0.76056338028169  | 0                  | 2.00E-04         | 1                    | 0.0015       | 0            | NA               | NA               |
| NM_001242329 | <i>USP17L5</i>  | 0.759200363471149 | 0                  | 0.0946           | 0.9036               | 1            | 0.0171       | NA               | NA               |
| NM_020987    | <i>ANK3</i>     | 0.757837346660609 | 0                  | 2.00E-04         | 1                    | 0.0015       | 0            | NA               | NA               |
| NR_003506    | <i>PLGLA</i>    | 0.749204906860518 | 0                  | 2.00E-04         | 1                    | 0.0015       | 0            | NA               | NA               |
| NM_001256855 | <i>USP17L13</i> | 0.748296228986824 | 0                  | 0.045            | 0.9598               | 0.42         | 0.0083       | NA               | NA               |
| NM_001099692 | <i>EIF5AL1</i>  | 0.74738755111313  | 0                  | 2.00E-04         | 1                    | 0.0015       | 0            | NA               | NA               |
| NM_001232    | <i>CASQ2</i>    | 0.74602453430259  | 0                  | 2.00E-04         | 1                    | 0.0015       | 0            | NA               | NA               |
| NM_006182    | <i>DDR2</i>     | 0.728759654702408 | 0                  | 2.00E-04         | 1                    | 0.0015       | 0            | NA               | NA               |
| NM_001014796 | <i>DDR2</i>     | 0.728759654702408 | 0                  | 2.00E-04         | 1                    | 0.0015       | 0            | NA               | NA               |
| NM_001004694 | <i>OR2T29</i>   | 0.722853248523398 | 0                  | 2.00E-04         | 1                    | 0.0015       | 0            | NA               | NA               |
| NM_001256873 | <i>USP17L1P</i> | 0.722398909586552 | 0                  | 2.00E-04         | 1                    | 0.0015       | 0            | NA               | NA               |
| NR_027151    | <i>PRR26</i>    | 0.716038164470695 | 0                  | 2.00E-04         | 1                    | 0.0015       | 0            | NA               | NA               |
| NM_145312    | <i>ZNF485</i>   | 0.714675147660154 | 0                  | 2.00E-04         | 1                    | 0.0015       | 0            | NA               | NA               |
| NM_005708    | <i>GPC6</i>     | 0.755565651976374 | 0.0481599273057701 | 2.00E-04         | 1                    | 0.0015       | 0            | NA               | NA               |
| NM_001253875 | <i>UXS1</i>     | 0.70649704679691  | 0                  | 2.00E-04         | 1                    | 0.0015       | 0            | NA               | NA               |
| NR_045607    | <i>UXS1</i>     | 0.70649704679691  | 0                  | 2.00E-04         | 1                    | 0.0015       | 0            | NA               | NA               |
| NM_025076    | <i>UXS1</i>     | 0.70649704679691  | 0                  | 2.00E-04         | 1                    | 0.0015       | 0            | NA               | NA               |
| NM_002665    | <i>PLGLB2</i>   | 0.701953657428442 | 0                  | 2.00E-04         | 1                    | 0.0015       | 0            | NA               | NA               |
| NM_001032392 | <i>PLGLB1</i>   | 0.701953657428442 | 0                  | 2.00E-04         | 1                    | 0.0015       | 0            | NA               | NA               |
| NM_198989    | <i>DLEU7</i>    | 0.692412539754657 | 0                  | 2.00E-04         | 1                    | 0.0015       | 0            | NA               | NA               |
| NM_014801    | <i>PCNXL2</i>   | 0.690140845070423 | 0                  | 2.00E-04         | 1                    | 0.0015       | 0            | NA               | NA               |
| NM_004010    | <i>DMD</i>      | 0.689686506133576 | 0                  | 2.00E-04         | 1                    | 0.0015       | 0            | NA               | NA               |
| NM_004009    | <i>DMD</i>      | 0.689232167196729 | 0                  | 2.00E-04         | 1                    | 0.0015       | 0            | NA               | NA               |
| NM_133637    | <i>DQX1</i>     | 0.686506133575647 | 0                  | 2.00E-04         | 1                    | 0.0015       | 0            | NA               | NA               |
| NM_001168359 | <i>TDRD6</i>    | 0.679691049522944 | 0                  | 2.00E-04         | 1                    | 0.0015       | 0            | NA               | NA               |
| NM_001010870 | <i>TDRD6</i>    | 0.679691049522944 | 0                  | 2.00E-04         | 1                    | 0.0015       | 0            | NA               | NA               |
| NM_001145014 | <i>RFPL4A</i>   | 0.669695592912313 | 0                  | 2.00E-04         | 1                    | 0.0015       | 0            | NA               | NA               |
| NM_002864    | <i>PZP</i>      | 0.668332576101772 | 0                  | 2.00E-04         | 1                    | 0.0015       | 0            | NA               | NA               |
| NM_001197220 | <i>PDE4D</i>    | 0.668332576101772 | 0                  | 2.00E-04         | 1                    | 0.0015       | 0            | NA               | NA               |
| NR_003558    | <i>WBP11P1</i>  | 0.667423898228078 | 0                  | 2.00E-04         | 1                    | 0.0015       | 0            | NA               | NA               |
| NM_000396    | <i>CTSK</i>     | 0.665606542480691 | 0                  | 2.00E-04         | 1                    | 0.0015       | 0            | NA               | NA               |
| NM_001278495 | <i>NUTM2B</i>   | 0.665152203543844 | 0                  | 2.00E-04         | 1                    | 0.0015       | 0            | NA               | NA               |
| NR_000017    | <i>SNORD36B</i> | 0.664697864606997 | 0                  | 2.00E-04         | 1                    | 0.0015       | 0            | NA               | NA               |
| NM_001080477 | <i>TENM3</i>    | 0.66424352567015  | 0                  | 2.00E-04         | 1                    | 0.0015       | 0            | NA               | NA               |
| NR_003010    | <i>SCARNA12</i> | 0.661517492049069 | 0                  | 2.00E-04         | 1                    | 0.0015       | 0            | NA               | NA               |

|              |                    |                   |   |          |   |        |   |    |    |
|--------------|--------------------|-------------------|---|----------|---|--------|---|----|----|
| NM_000773    | <i>CYP2E1</i>      | 0.659700136301681 | 0 | 2.00E-04 | 1 | 0.0015 | 0 | NA | NA |
| NR_027152    | <i>PRR26</i>       | 0.657428441617447 | 0 | 2.00E-04 | 1 | 0.0015 | 0 | NA | NA |
| NR_028399    | <i>TSNAX-DISC1</i> | 0.656065424806906 | 0 | 2.00E-04 | 1 | 0.0015 | 0 | NA | NA |
| NR_028394    | <i>TSNAX-DISC1</i> | 0.656065424806906 | 0 | 2.00E-04 | 1 | 0.0015 | 0 | NA | NA |
| NR_028393    | <i>TSNAX-DISC1</i> | 0.656065424806906 | 0 | 2.00E-04 | 1 | 0.0015 | 0 | NA | NA |
| NR_028400    | <i>TSNAX-DISC1</i> | 0.656065424806906 | 0 | 2.00E-04 | 1 | 0.0015 | 0 | NA | NA |
| NR_028396    | <i>TSNAX-DISC1</i> | 0.656065424806906 | 0 | 2.00E-04 | 1 | 0.0015 | 0 | NA | NA |
| NR_028395    | <i>TSNAX-DISC1</i> | 0.656065424806906 | 0 | 2.00E-04 | 1 | 0.0015 | 0 | NA | NA |
| NR_028398    | <i>TSNAX-DISC1</i> | 0.656065424806906 | 0 | 2.00E-04 | 1 | 0.0015 | 0 | NA | NA |
| NR_028397    | <i>TSNAX-DISC1</i> | 0.656065424806906 | 0 | 2.00E-04 | 1 | 0.0015 | 0 | NA | NA |
| NM_005999    | <i>TSNAX</i>       | 0.656065424806906 | 0 | 2.00E-04 | 1 | 0.0015 | 0 | NA | NA |
| NM_001160174 | <i>NAT1</i>        | 0.656065424806906 | 0 | 2.00E-04 | 1 | 0.0015 | 0 | NA | NA |
| NR_103466    | <i>NBPF13P</i>     | 0.655156746933212 | 0 | 2.00E-04 | 1 | 0.0015 | 0 | NA | NA |
| NM_001164347 | <i>ZBTB20</i>      | 0.653339391185825 | 0 | 2.00E-04 | 1 | 0.0015 | 0 | NA | NA |
| NM_144631    | <i>ZNF513</i>      | 0.650613357564743 | 0 | 2.00E-04 | 1 | 0.0015 | 0 | NA | NA |
| NM_001099435 | <i>SPDYE5</i>      | 0.64970467969105  | 0 | 2.00E-04 | 1 | 0.0015 | 0 | NA | NA |
| NM_001258211 | <i>FBXO16</i>      | 0.647887323943662 | 0 | 2.00E-04 | 1 | 0.0015 | 0 | NA | NA |
| NM_172366    | <i>FBXO16</i>      | 0.647887323943662 | 0 | 2.00E-04 | 1 | 0.0015 | 0 | NA | NA |
| NM_001166393 | <i>MTUS1</i>       | 0.647432985006815 | 0 | 2.00E-04 | 1 | 0.0015 | 0 | NA | NA |
| NM_001001931 | <i>MTUS1</i>       | 0.647432985006815 | 0 | 2.00E-04 | 1 | 0.0015 | 0 | NA | NA |
| NM_001163677 | <i>KCNMB3</i>      | 0.646978646069968 | 0 | 2.00E-04 | 1 | 0.0015 | 0 | NA | NA |
| NM_171828    | <i>KCNMB3</i>      | 0.646978646069968 | 0 | 2.00E-04 | 1 | 0.0015 | 0 | NA | NA |
| NM_000301    | <i>PLG</i>         | 0.636074511585643 | 0 | 2.00E-04 | 1 | 0.0015 | 0 | NA | NA |
| NM_001168338 | <i>PLG</i>         | 0.636074511585643 | 0 | 2.00E-04 | 1 | 0.0015 | 0 | NA | NA |
| NM_001009894 | <i>C12orf29</i>    | 0.633348477964562 | 0 | 2.00E-04 | 1 | 0.0015 | 0 | NA | NA |
| NM_005086    | <i>SSPN</i>        | 0.630168105406633 | 0 | 2.00E-04 | 1 | 0.0015 | 0 | NA | NA |
| NM_016609    | <i>SLC22A17</i>    | 0.629713766469786 | 0 | 2.00E-04 | 1 | 0.0015 | 0 | NA | NA |
| NR_033942    | <i>ARHGEF34P</i>   | 0.624261699227624 | 0 | 2.00E-04 | 1 | 0.0015 | 0 | NA | NA |
| NM_000390    | <i>CHM</i>         | 0.621535665606542 | 0 | 2.00E-04 | 1 | 0.0015 | 0 | NA | NA |
| NM_001145414 | <i>CHM</i>         | 0.621535665606542 | 0 | 2.00E-04 | 1 | 0.0015 | 0 | NA | NA |
| NM_001284353 | <i>KIAA1324</i>    | 0.618809631985461 | 0 | 2.00E-04 | 1 | 0.0015 | 0 | NA | NA |
| NR_049774    | <i>KIAA1324</i>    | 0.618809631985461 | 0 | 2.00E-04 | 1 | 0.0015 | 0 | NA | NA |
| NM_012184    | <i>FOXD4L1</i>     | 0.617900954111767 | 0 | 2.00E-04 | 1 | 0.0015 | 0 | NA | NA |
| NM_015025    | <i>MYT1L</i>       | 0.617900954111767 | 0 | 2.00E-04 | 1 | 0.0015 | 0 | NA | NA |
| NR_002575    | <i>SNORA27</i>     | 0.61608359836438  | 0 | 2.00E-04 | 1 | 0.0015 | 0 | NA | NA |
| NM_020769    | <i>RGAG1</i>       | 0.611540208995911 | 0 | 2.00E-04 | 1 | 0.0015 | 0 | NA | NA |
| NR_037480    | <i>MIR3916</i>     | 0.610631531122217 | 0 | 2.00E-04 | 1 | 0.0015 | 0 | NA | NA |
| NM_133486    | <i>MBNL3</i>       | 0.60881417537483  | 0 | 2.00E-04 | 1 | 0.0015 | 0 | NA | NA |
| NM_018388    | <i>MBNL3</i>       | 0.60881417537483  | 0 | 2.00E-04 | 1 | 0.0015 | 0 | NA | NA |
| NM_001258239 | <i>TMEM218</i>     | 0.607905497501136 | 0 | 2.00E-04 | 1 | 0.0015 | 0 | NA | NA |
| NM_001258238 | <i>TMEM218</i>     | 0.607905497501136 | 0 | 2.00E-04 | 1 | 0.0015 | 0 | NA | NA |
| NM_001258241 | <i>TMEM218</i>     | 0.607905497501136 | 0 | 2.00E-04 | 1 | 0.0015 | 0 | NA | NA |
| NM_001258240 | <i>TMEM218</i>     | 0.607905497501136 | 0 | 2.00E-04 | 1 | 0.0015 | 0 | NA | NA |
| NR_047587    | <i>TMEM218</i>     | 0.607905497501136 | 0 | 2.00E-04 | 1 | 0.0015 | 0 | NA | NA |
| NR_047586    | <i>TMEM218</i>     | 0.607905497501136 | 0 | 2.00E-04 | 1 | 0.0015 | 0 | NA | NA |
| NM_001261419 | <i>IL1R2</i>       | 0.605179463880055 | 0 | 2.00E-04 | 1 | 0.0015 | 0 | NA | NA |
| NM_004633    | <i>IL1R2</i>       | 0.605179463880055 | 0 | 2.00E-04 | 1 | 0.0015 | 0 | NA | NA |

|              |           |                   |   |          |   |        |   |    |    |
|--------------|-----------|-------------------|---|----------|---|--------|---|----|----|
| NM_181491    | MED22     | 0.602453430258973 | 0 | 2.00E-04 | 1 | 0.0015 | 0 | NA | NA |
| NM_133640    | MED22     | 0.602453430258973 | 0 | 2.00E-04 | 1 | 0.0015 | 0 | NA | NA |
| NM_006403    | NEDD9     | 0.601090413448433 | 0 | 2.00E-04 | 1 | 0.0015 | 0 | NA | NA |
| NM_182966    | NEDD9     | 0.601090413448433 | 0 | 2.00E-04 | 1 | 0.0015 | 0 | NA | NA |
| NM_001271033 | NEDD9     | 0.601090413448433 | 0 | 2.00E-04 | 1 | 0.0015 | 0 | NA | NA |
| NM_207305    | FOXD4     | 0.601090413448433 | 0 | 2.00E-04 | 1 | 0.0015 | 0 | NA | NA |
| NM_000715    | C4BPA     | 0.598364379827351 | 0 | 2.00E-04 | 1 | 0.0015 | 0 | NA | NA |
| NM_001167579 | SLC34A1   | 0.597455701953657 | 0 | 2.00E-04 | 1 | 0.0015 | 0 | NA | NA |
| NM_003052    | SLC34A1   | 0.597455701953657 | 0 | 2.00E-04 | 1 | 0.0015 | 0 | NA | NA |
| NM_020185    | DUSP22    | 0.596547024079964 | 0 | 2.00E-04 | 1 | 0.0015 | 0 | NA | NA |
| NM_001159642 | BNIPL     | 0.594729668332576 | 0 | 2.00E-04 | 1 | 0.0015 | 0 | NA | NA |
| NM_138278    | BNIPL     | 0.594729668332576 | 0 | 2.00E-04 | 1 | 0.0015 | 0 | NA | NA |
| NM_020130    | C8orf4    | 0.593366651522035 | 0 | 2.00E-04 | 1 | 0.0015 | 0 | NA | NA |
| NM_003915    | CPNE1     | 0.593366651522035 | 0 | 2.00E-04 | 1 | 0.0015 | 0 | NA | NA |
| NM_001135823 | SSPN      | 0.592457973648342 | 0 | 2.00E-04 | 1 | 0.0015 | 0 | NA | NA |
| NM_198503    | KCNT2     | 0.588823262153567 | 0 | 2.00E-04 | 1 | 0.0015 | 0 | NA | NA |
| NM_032279    | ATP13A4   | 0.58836892321672  | 0 | 2.00E-04 | 1 | 0.0015 | 0 | NA | NA |
| NM_170610    | HIST1H2BA | 0.586097228532485 | 0 | 2.00E-04 | 1 | 0.0015 | 0 | NA | NA |
| NM_001004754 | OR5112    | 0.583371194911404 | 0 | 2.00E-04 | 1 | 0.0015 | 0 | NA | NA |
| NR_015358    | LINC00643 | 0.583371194911404 | 0 | 2.00E-04 | 1 | 0.0015 | 0 | NA | NA |
| NM_001258244 | TMEM218   | 0.582916855974557 | 0 | 2.00E-04 | 1 | 0.0015 | 0 | NA | NA |
| NM_001080546 | TMEM218   | 0.582916855974557 | 0 | 2.00E-04 | 1 | 0.0015 | 0 | NA | NA |
| NM_001258242 | TMEM218   | 0.582916855974557 | 0 | 2.00E-04 | 1 | 0.0015 | 0 | NA | NA |
| NM_001258247 | TMEM218   | 0.582916855974557 | 0 | 2.00E-04 | 1 | 0.0015 | 0 | NA | NA |
| NM_001258246 | TMEM218   | 0.582916855974557 | 0 | 2.00E-04 | 1 | 0.0015 | 0 | NA | NA |
| NM_001258245 | TMEM218   | 0.582916855974557 | 0 | 2.00E-04 | 1 | 0.0015 | 0 | NA | NA |
| NM_001258243 | TMEM218   | 0.582916855974557 | 0 | 2.00E-04 | 1 | 0.0015 | 0 | NA | NA |
| NR_047592    | TMEM218   | 0.582916855974557 | 0 | 2.00E-04 | 1 | 0.0015 | 0 | NA | NA |
| NR_047591    | TMEM218   | 0.582916855974557 | 0 | 2.00E-04 | 1 | 0.0015 | 0 | NA | NA |
| NR_047590    | TMEM218   | 0.582916855974557 | 0 | 2.00E-04 | 1 | 0.0015 | 0 | NA | NA |
| NR_047589    | TMEM218   | 0.582916855974557 | 0 | 2.00E-04 | 1 | 0.0015 | 0 | NA | NA |
| NR_047588    | TMEM218   | 0.582916855974557 | 0 | 2.00E-04 | 1 | 0.0015 | 0 | NA | NA |
| NM_006399    | BATF      | 0.579282144479782 | 0 | 2.00E-04 | 1 | 0.0015 | 0 | NA | NA |
| NM_001198834 | PDE4DIP   | 0.578373466606088 | 0 | 2.00E-04 | 1 | 0.0015 | 0 | NA | NA |
| NM_014644    | PDE4DIP   | 0.578373466606088 | 0 | 2.00E-04 | 1 | 0.0015 | 0 | NA | NA |
| NM_001002812 | PDE4DIP   | 0.578373466606088 | 0 | 2.00E-04 | 1 | 0.0015 | 0 | NA | NA |
| NM_001195261 | PDE4DIP   | 0.578373466606088 | 0 | 2.00E-04 | 1 | 0.0015 | 0 | NA | NA |
| NM_001002810 | PDE4DIP   | 0.578373466606088 | 0 | 2.00E-04 | 1 | 0.0015 | 0 | NA | NA |
| NM_175064    | SPDYE1    | 0.576556110858701 | 0 | 2.00E-04 | 1 | 0.0015 | 0 | NA | NA |
| NM_006493    | CLN5      | 0.576101771921854 | 0 | 2.00E-04 | 1 | 0.0015 | 0 | NA | NA |
| NM_138960    | TGIF2LX   | 0.576101771921854 | 0 | 2.00E-04 | 1 | 0.0015 | 0 | NA | NA |
| NM_178168    | OR10A5    | 0.574738755111313 | 0 | 2.00E-04 | 1 | 0.0015 | 0 | NA | NA |
| NM_152536    | FGD5      | 0.573375738300772 | 0 | 2.00E-04 | 1 | 0.0015 | 0 | NA | NA |
| NM_002187    | IL12B     | 0.572921399363925 | 0 | 2.00E-04 | 1 | 0.0015 | 0 | NA | NA |
| NM_001243723 | SETMAR    | 0.571104043616538 | 0 | 2.00E-04 | 1 | 0.0015 | 0 | NA | NA |
| NM_006515    | SETMAR    | 0.571104043616538 | 0 | 2.00E-04 | 1 | 0.0015 | 0 | NA | NA |
| NM_001276325 | SETMAR    | 0.571104043616538 | 0 | 2.00E-04 | 1 | 0.0015 | 0 | NA | NA |

|              |           |                   |                    |          |   |        |   |    |    |
|--------------|-----------|-------------------|--------------------|----------|---|--------|---|----|----|
| NR_075073    | SETMAR    | 0.571104043616538 | 0                  | 2.00E-04 | 1 | 0.0015 | 0 | NA | NA |
| NM_001282786 | PRTFDC1   | 0.571104043616538 | 0                  | 2.00E-04 | 1 | 0.0015 | 0 | NA | NA |
| NM_020200    | PRTFDC1   | 0.571104043616538 | 0                  | 2.00E-04 | 1 | 0.0015 | 0 | NA | NA |
| NM_144575    | CAPN13    | 0.595184007269423 | 0.0240799636528851 | 2.00E-04 | 1 | 0.0015 | 0 | NA | NA |
| NM_001004759 | OR51T1    | 0.63062244434348  | 0.0599727396637892 | 2.00E-04 | 1 | 0.0015 | 0 | NA | NA |
| NM_001166035 | SBSN      | 0.570195365742844 | 0                  | 2.00E-04 | 1 | 0.0015 | 0 | NA | NA |
| NM_001166034 | SBSN      | 0.570195365742844 | 0                  | 2.00E-04 | 1 | 0.0015 | 0 | NA | NA |
| NM_198538    | SBSN      | 0.570195365742844 | 0                  | 2.00E-04 | 1 | 0.0015 | 0 | NA | NA |
| NM_014864    | FAM20B    | 0.568832348932303 | 0                  | 2.00E-04 | 1 | 0.0015 | 0 | NA | NA |
| NM_001001821 | OR2T34    | 0.568378009995457 | 0                  | 2.00E-04 | 1 | 0.0015 | 0 | NA | NA |
| NM_001243704 | ZBTB14    | 0.56792367105861  | 0                  | 2.00E-04 | 1 | 0.0015 | 0 | NA | NA |
| NM_004371    | COPA      | 0.566560654248069 | 0                  | 2.00E-04 | 1 | 0.0015 | 0 | NA | NA |
| NM_001098398 | COPA      | 0.566560654248069 | 0                  | 2.00E-04 | 1 | 0.0015 | 0 | NA | NA |
| NM_182913    | SYNE2     | 0.565651976374375 | 0                  | 2.00E-04 | 1 | 0.0015 | 0 | NA | NA |
| NM_001040283 | DMRTC2    | 0.565651976374375 | 0                  | 2.00E-04 | 1 | 0.0015 | 0 | NA | NA |
| NM_017803    | DUS2      | 0.564743298500682 | 0                  | 2.00E-04 | 1 | 0.0015 | 0 | NA | NA |
| NM_001271762 | DUS2      | 0.564743298500682 | 0                  | 2.00E-04 | 1 | 0.0015 | 0 | NA | NA |
| NM_001271763 | DUS2      | 0.564743298500682 | 0                  | 2.00E-04 | 1 | 0.0015 | 0 | NA | NA |
| NM_001122961 | C1orf194  | 0.639254884143571 | 0.0745115856428896 | 2.00E-04 | 1 | 0.0015 | 0 | NA | NA |
| NM_173506    | LYPD4     | 0.56065424806906  | 0                  | 2.00E-04 | 1 | 0.0015 | 0 | NA | NA |
| NM_005330    | HBE1      | 0.559745570195366 | 0                  | 2.00E-04 | 1 | 0.0015 | 0 | NA | NA |
| NM_004426    | PHC1      | 0.557019536574284 | 0                  | 2.00E-04 | 1 | 0.0015 | 0 | NA | NA |
| NR_046449    | LOC374443 | 0.557019536574284 | 0                  | 2.00E-04 | 1 | 0.0015 | 0 | NA | NA |
| NR_036209    | MIR4324   | 0.556565197637438 | 0                  | 2.00E-04 | 1 | 0.0015 | 0 | NA | NA |
| NM_006898    | HOXD3     | 0.555202180826897 | 0                  | 2.00E-04 | 1 | 0.0015 | 0 | NA | NA |
| NM_006273    | CCL7      | 0.552930486142662 | 0                  | 2.00E-04 | 1 | 0.0015 | 0 | NA | NA |
| NM_001130417 | SLC8A3    | 0.548387096774194 | 0                  | 2.00E-04 | 1 | 0.0015 | 0 | NA | NA |
| NM_182936    | SLC8A3    | 0.548387096774194 | 0                  | 2.00E-04 | 1 | 0.0015 | 0 | NA | NA |
| NM_006572    | GNA13     | 0.548387096774194 | 0                  | 2.00E-04 | 1 | 0.0015 | 0 | NA | NA |
| NM_001177704 | FREM1     | 0.5474784189005   | 0                  | 2.00E-04 | 1 | 0.0015 | 0 | NA | NA |
| NM_032960    | MAPKAPK2  | 0.543843707405725 | 0                  | 2.00E-04 | 1 | 0.0015 | 0 | NA | NA |
| NM_004759    | MAPKAPK2  | 0.543843707405725 | 0                  | 2.00E-04 | 1 | 0.0015 | 0 | NA | NA |
| NR_003135    | CEP170P1  | 0.543843707405725 | 0                  | 2.00E-04 | 1 | 0.0015 | 0 | NA | NA |
| NM_001201459 | ZNF513    | 0.631531122217174 | 0.08905043162199   | 2.00E-04 | 1 | 0.0015 | 0 | NA | NA |
| NM_001128834 | PLP1      | 0.542026351658337 | 0                  | 2.00E-04 | 1 | 0.0015 | 0 | NA | NA |
| NM_020372    | SLC22A17  | 0.540663334847796 | 0                  | 2.00E-04 | 1 | 0.0015 | 0 | NA | NA |
| NM_006641    | CCR9      | 0.54020899591095  | 0                  | 2.00E-04 | 1 | 0.0015 | 0 | NA | NA |
| NM_031200    | CCR9      | 0.54020899591095  | 0                  | 2.00E-04 | 1 | 0.0015 | 0 | NA | NA |
| NM_001256369 | CCR9      | 0.54020899591095  | 0                  | 2.00E-04 | 1 | 0.0015 | 0 | NA | NA |
| NM_020154    | EMC7      | 0.539300318037256 | 0                  | 2.00E-04 | 1 | 0.0015 | 0 | NA | NA |
| NM_001135953 | GKAP1     | 0.539300318037256 | 0                  | 2.00E-04 | 1 | 0.0015 | 0 | NA | NA |
| NM_025211    | GKAP1     | 0.539300318037256 | 0                  | 2.00E-04 | 1 | 0.0015 | 0 | NA | NA |
| NR_015407    | LOC339535 | 0.538845979100409 | 0                  | 2.00E-04 | 1 | 0.0015 | 0 | NA | NA |
| NM_018404    | ADAP2     | 0.537937301226715 | 0                  | 2.00E-04 | 1 | 0.0015 | 0 | NA | NA |
| NM_152622    | MIER3     | 0.537937301226715 | 0                  | 2.00E-04 | 1 | 0.0015 | 0 | NA | NA |
| NM_006820    | IFI44L    | 0.537482962289868 | 0                  | 2.00E-04 | 1 | 0.0015 | 0 | NA | NA |
| NR_037647    | FOXRED1   | 0.537482962289868 | 0                  | 2.00E-04 | 1 | 0.0015 | 0 | NA | NA |

|              |              |                   |   |          |   |        |   |    |    |
|--------------|--------------|-------------------|---|----------|---|--------|---|----|----|
| NM_017547    | FOXRED1      | 0.537482962289868 | 0 | 2.00E-04 | 1 | 0.0015 | 0 | NA | NA |
| NM_005850    | SF3B4        | 0.537482962289868 | 0 | 2.00E-04 | 1 | 0.0015 | 0 | NA | NA |
| NR_046365    | FAM90A27P    | 0.536119945479328 | 0 | 2.00E-04 | 1 | 0.0015 | 0 | NA | NA |
| NM_000140    | FECH         | 0.53430258973194  | 0 | 2.00E-04 | 1 | 0.0015 | 0 | NA | NA |
| NM_001012515 | FECH         | 0.53430258973194  | 0 | 2.00E-04 | 1 | 0.0015 | 0 | NA | NA |
| NM_000488    | SERPINC1     | 0.532939572921399 | 0 | 2.00E-04 | 1 | 0.0015 | 0 | NA | NA |
| NR_103537    | FAM87A       | 0.531122217174012 | 0 | 2.00E-04 | 1 | 0.0015 | 0 | NA | NA |
| NR_003928    | CHIAP2       | 0.530667878237165 | 0 | 2.00E-04 | 1 | 0.0015 | 0 | NA | NA |
| NM_024751    | GSTCD        | 0.529759200363471 | 0 | 2.00E-04 | 1 | 0.0015 | 0 | NA | NA |
| NR_027068    | EFCAB10      | 0.526578827805543 | 0 | 2.00E-04 | 1 | 0.0015 | 0 | NA | NA |
| NM_014483    | RBMS3        | 0.525670149931849 | 0 | 2.00E-04 | 1 | 0.0015 | 0 | NA | NA |
| NM_001177712 | RBMS3        | 0.525670149931849 | 0 | 2.00E-04 | 1 | 0.0015 | 0 | NA | NA |
| NM_001177711 | RBMS3        | 0.525670149931849 | 0 | 2.00E-04 | 1 | 0.0015 | 0 | NA | NA |
| NM_001003792 | RBMS3        | 0.525670149931849 | 0 | 2.00E-04 | 1 | 0.0015 | 0 | NA | NA |
| NM_001003793 | RBMS3        | 0.525670149931849 | 0 | 2.00E-04 | 1 | 0.0015 | 0 | NA | NA |
| NM_001244950 | SPOCK2       | 0.525670149931849 | 0 | 2.00E-04 | 1 | 0.0015 | 0 | NA | NA |
| NM_014767    | SPOCK2       | 0.525670149931849 | 0 | 2.00E-04 | 1 | 0.0015 | 0 | NA | NA |
| NM_001134434 | SPOCK2       | 0.525670149931849 | 0 | 2.00E-04 | 1 | 0.0015 | 0 | NA | NA |
| NM_024410    | ODF1         | 0.523852794184462 | 0 | 2.00E-04 | 1 | 0.0015 | 0 | NA | NA |
| NM_031900    | AGXT2        | 0.523398455247615 | 0 | 2.00E-04 | 1 | 0.0015 | 0 | NA | NA |
| NM_001010940 | C9orf135     | 0.522944116310768 | 0 | 2.00E-04 | 1 | 0.0015 | 0 | NA | NA |
| NM_000601    | HGF          | 0.518400726942299 | 0 | 2.00E-04 | 1 | 0.0015 | 0 | NA | NA |
| NM_001010933 | HGF          | 0.518400726942299 | 0 | 2.00E-04 | 1 | 0.0015 | 0 | NA | NA |
| NM_001010931 | HGF          | 0.518400726942299 | 0 | 2.00E-04 | 1 | 0.0015 | 0 | NA | NA |
| NM_001010934 | HGF          | 0.518400726942299 | 0 | 2.00E-04 | 1 | 0.0015 | 0 | NA | NA |
| NM_001010932 | HGF          | 0.518400726942299 | 0 | 2.00E-04 | 1 | 0.0015 | 0 | NA | NA |
| NM_001639    | APCS         | 0.517037710131758 | 0 | 2.00E-04 | 1 | 0.0015 | 0 | NA | NA |
| NM_030958    | SLCO5A1      | 0.517037710131758 | 0 | 2.00E-04 | 1 | 0.0015 | 0 | NA | NA |
| NM_001005187 | ORGT1        | 0.516129032258065 | 0 | 2.00E-04 | 1 | 0.0015 | 0 | NA | NA |
| NM_080387    | CLEC4D       | 0.514766015447524 | 0 | 2.00E-04 | 1 | 0.0015 | 0 | NA | NA |
| NM_005450    | NOG          | 0.514311676510677 | 0 | 2.00E-04 | 1 | 0.0015 | 0 | NA | NA |
| NM_001167676 | FAM229A      | 0.511585642889596 | 0 | 2.00E-04 | 1 | 0.0015 | 0 | NA | NA |
| NR_103538    | C6orf100     | 0.511131303952749 | 0 | 2.00E-04 | 1 | 0.0015 | 0 | NA | NA |
| NM_001242618 | NXT2         | 0.508859609268514 | 0 | 2.00E-04 | 1 | 0.0015 | 0 | NA | NA |
| NM_052939    | FCRL3        | 0.507950931394821 | 0 | 2.00E-04 | 1 | 0.0015 | 0 | NA | NA |
| NM_080610    | CST9L        | 0.507496592457974 | 0 | 2.00E-04 | 1 | 0.0015 | 0 | NA | NA |
| NM_171829    | KCNMB3       | 0.507496592457974 | 0 | 2.00E-04 | 1 | 0.0015 | 0 | NA | NA |
| NR_028135    | KCNMB3       | 0.507496592457974 | 0 | 2.00E-04 | 1 | 0.0015 | 0 | NA | NA |
| NM_001256293 | KRT8         | 0.505679236710586 | 0 | 2.00E-04 | 1 | 0.0015 | 0 | NA | NA |
| NR_045962    | KRT8         | 0.505679236710586 | 0 | 2.00E-04 | 1 | 0.0015 | 0 | NA | NA |
| NR_073494    | LOC100130075 | 0.505224897773739 | 0 | 2.00E-04 | 1 | 0.0015 | 0 | NA | NA |
| NM_001267536 | GOLGA6L4     | 0.504316219900045 | 0 | 2.00E-04 | 1 | 0.0015 | 0 | NA | NA |
| NM_001271014 | KTN1         | 0.503861880963199 | 0 | 2.00E-04 | 1 | 0.0015 | 0 | NA | NA |
| NM_001079521 | KTN1         | 0.503861880963199 | 0 | 2.00E-04 | 1 | 0.0015 | 0 | NA | NA |
| NM_004986    | KTN1         | 0.503861880963199 | 0 | 2.00E-04 | 1 | 0.0015 | 0 | NA | NA |
| NM_001079522 | KTN1         | 0.503861880963199 | 0 | 2.00E-04 | 1 | 0.0015 | 0 | NA | NA |
| NR_073129    | KTN1         | 0.503861880963199 | 0 | 2.00E-04 | 1 | 0.0015 | 0 | NA | NA |

|              |                    |                   |   |          |   |        |   |    |    |
|--------------|--------------------|-------------------|---|----------|---|--------|---|----|----|
| NR_073128    | <i>KTN1</i>        | 0.503861880963199 | 0 | 2.00E-04 | 1 | 0.0015 | 0 | NA | NA |
| NR_003671    | <i>LOC728024</i>   | 0.502498864152658 | 0 | 2.00E-04 | 1 | 0.0015 | 0 | NA | NA |
| NM_001164464 | <i>TRIM43B</i>     | 0.502044525215811 | 0 | 2.00E-04 | 1 | 0.0015 | 0 | NA | NA |
| NM_0014446   | <i>FABP7</i>       | 0.50068150840527  | 0 | 2.00E-04 | 1 | 0.0015 | 0 | NA | NA |
| NM_001243081 | <i>ELF5</i>        | 0.50068150840527  | 0 | 2.00E-04 | 1 | 0.0015 | 0 | NA | NA |
| NM_198381    | <i>ELF5</i>        | 0.50068150840527  | 0 | 2.00E-04 | 1 | 0.0015 | 0 | NA | NA |
| NM_001007026 | <i>ATN1</i>        | 0.500227169468423 | 0 | 2.00E-04 | 1 | 0.0015 | 0 | NA | NA |
| NM_148898    | <i>FOXP2</i>       | 0.499772830531577 | 0 | 2.00E-04 | 1 | 0.0015 | 0 | NA | NA |
| NM_148900    | <i>FOXP2</i>       | 0.499772830531577 | 0 | 2.00E-04 | 1 | 0.0015 | 0 | NA | NA |
| NR_033767    | <i>FOXP2</i>       | 0.499772830531577 | 0 | 2.00E-04 | 1 | 0.0015 | 0 | NA | NA |
| NM_001172766 | <i>FOXP2</i>       | 0.499772830531577 | 0 | 2.00E-04 | 1 | 0.0015 | 0 | NA | NA |
| NM_014491    | <i>FOXP2</i>       | 0.499772830531577 | 0 | 2.00E-04 | 1 | 0.0015 | 0 | NA | NA |
| NM_001134888 | <i>RTL1</i>        | 0.49931849159473  | 0 | 2.00E-04 | 1 | 0.0015 | 0 | NA | NA |
| NR_028443    | <i>SLC25A5-AS1</i> | 0.497501135847342 | 0 | 2.00E-04 | 1 | 0.0015 | 0 | NA | NA |
| NM_182506    | <i>MAGEB10</i>     | 0.497046796910495 | 0 | 2.00E-04 | 1 | 0.0015 | 0 | NA | NA |
| NR_003945    | <i>GVINP1</i>      | 0.497046796910495 | 0 | 2.00E-04 | 1 | 0.0015 | 0 | NA | NA |
| NM_022728    | <i>NEUROD6</i>     | 0.497046796910495 | 0 | 2.00E-04 | 1 | 0.0015 | 0 | NA | NA |
| NM_194287    | <i>C14orf166B</i>  | 0.496592457973648 | 0 | 2.00E-04 | 1 | 0.0015 | 0 | NA | NA |
| NM_203373    | <i>FBXL22</i>      | 0.494775102226261 | 0 | 2.00E-04 | 1 | 0.0015 | 0 | NA | NA |
| NM_001145718 | <i>CT47B1</i>      | 0.494775102226261 | 0 | 2.00E-04 | 1 | 0.0015 | 0 | NA | NA |
| NM_001004458 | <i>OR1S1</i>       | 0.494320763289414 | 0 | 2.00E-04 | 1 | 0.0015 | 0 | NA | NA |
| NM_021903    | <i>GABBR1</i>      | 0.494320763289414 | 0 | 2.00E-04 | 1 | 0.0015 | 0 | NA | NA |
| NM_001035513 | <i>SDHC</i>        | 0.492503407542026 | 0 | 2.00E-04 | 1 | 0.0015 | 0 | NA | NA |
| NM_001278172 | <i>SDHC</i>        | 0.492503407542026 | 0 | 2.00E-04 | 1 | 0.0015 | 0 | NA | NA |
| NM_003001    | <i>SDHC</i>        | 0.492503407542026 | 0 | 2.00E-04 | 1 | 0.0015 | 0 | NA | NA |
| NM_001035512 | <i>SDHC</i>        | 0.492503407542026 | 0 | 2.00E-04 | 1 | 0.0015 | 0 | NA | NA |
| NM_001035511 | <i>SDHC</i>        | 0.492503407542026 | 0 | 2.00E-04 | 1 | 0.0015 | 0 | NA | NA |
| NR_103459    | <i>SDHC</i>        | 0.492503407542026 | 0 | 2.00E-04 | 1 | 0.0015 | 0 | NA | NA |
| NR_033579    | <i>CSPG4P8</i>     | 0.492503407542026 | 0 | 2.00E-04 | 1 | 0.0015 | 0 | NA | NA |
| NM_001037631 | <i>CTLA4</i>       | 0.492503407542026 | 0 | 2.00E-04 | 1 | 0.0015 | 0 | NA | NA |
| NM_005214    | <i>CTLA4</i>       | 0.492503407542026 | 0 | 2.00E-04 | 1 | 0.0015 | 0 | NA | NA |
| NR_026867    | <i>ZNF300P1</i>    | 0.492503407542026 | 0 | 2.00E-04 | 1 | 0.0015 | 0 | NA | NA |
| NR_037648    | <i>FOXRED1</i>     | 0.489777373920945 | 0 | 2.00E-04 | 1 | 0.0015 | 0 | NA | NA |
| NM_001144776 | <i>ELAVL4</i>      | 0.488868696047251 | 0 | 2.00E-04 | 1 | 0.0015 | 0 | NA | NA |
| NM_002100    | <i>GYPB</i>        | 0.488868696047251 | 0 | 2.00E-04 | 1 | 0.0015 | 0 | NA | NA |
| NM_170745    | <i>HIST1H2AA</i>   | 0.488414357110404 | 0 | 2.00E-04 | 1 | 0.0015 | 0 | NA | NA |
| NM_005099    | <i>ADAMTS4</i>     | 0.487505679236711 | 0 | 2.00E-04 | 1 | 0.0015 | 0 | NA | NA |
| NR_002574    | <i>SNORD102</i>    | 0.487051340299864 | 0 | 2.00E-04 | 1 | 0.0015 | 0 | NA | NA |
| NM_058206    | <i>SPAG11B</i>     | 0.485233984552476 | 0 | 2.00E-04 | 1 | 0.0015 | 0 | NA | NA |
| NM_058207    | <i>SPAG11B</i>     | 0.485233984552476 | 0 | 2.00E-04 | 1 | 0.0015 | 0 | NA | NA |
| NM_018980    | <i>TAS2R5</i>      | 0.484779645615629 | 0 | 2.00E-04 | 1 | 0.0015 | 0 | NA | NA |
| NM_001242506 | <i>GDA</i>         | 0.484325306678782 | 0 | 2.00E-04 | 1 | 0.0015 | 0 | NA | NA |
| NM_001242505 | <i>GDA</i>         | 0.484325306678782 | 0 | 2.00E-04 | 1 | 0.0015 | 0 | NA | NA |
| NM_004293    | <i>GDA</i>         | 0.484325306678782 | 0 | 2.00E-04 | 1 | 0.0015 | 0 | NA | NA |
| NM_001122731 | <i>MICAL3</i>      | 0.483870967741935 | 0 | 2.00E-04 | 1 | 0.0015 | 0 | NA | NA |
| NM_001136004 | <i>MICAL3</i>      | 0.483870967741935 | 0 | 2.00E-04 | 1 | 0.0015 | 0 | NA | NA |
| NR_002163    | <i>OR7E37P</i>     | 0.483416628805089 | 0 | 2.00E-04 | 1 | 0.0015 | 0 | NA | NA |



|              |           |                   |                   |          |   |        |   |    |    |
|--------------|-----------|-------------------|-------------------|----------|---|--------|---|----|----|
| NM_152598    | MARCH10   | 0.483416628805089 | 0                 | 2.00E-04 | 1 | 0.0015 | 0 | NA | NA |
| NM_007281    | SCRG1     | 0.482507950931395 | 0                 | 2.00E-04 | 1 | 0.0015 | 0 | NA | NA |
| NM_001004756 | OR51M1    | 0.482053611994548 | 0                 | 2.00E-04 | 1 | 0.0015 | 0 | NA | NA |
| NM_138967    | SCAMP5    | 0.481599273057701 | 0                 | 2.00E-04 | 1 | 0.0015 | 0 | NA | NA |
| NM_001178112 | SCAMP5    | 0.481599273057701 | 0                 | 2.00E-04 | 1 | 0.0015 | 0 | NA | NA |
| NR_033660    | SCAMP5    | 0.481599273057701 | 0                 | 2.00E-04 | 1 | 0.0015 | 0 | NA | NA |
| NM_001178111 | SCAMP5    | 0.481599273057701 | 0                 | 2.00E-04 | 1 | 0.0015 | 0 | NA | NA |
| NM_022076    | DUSP21    | 0.480690595184007 | 0                 | 2.00E-04 | 1 | 0.0015 | 0 | NA | NA |
| NM_032024    | C10orf11  | 0.479781917310313 | 0                 | 2.00E-04 | 1 | 0.0015 | 0 | NA | NA |
| NR_003579    | FRG1B     | 0.479327578373467 | 0                 | 2.00E-04 | 1 | 0.0015 | 0 | NA | NA |
| NR_034149    | LINC00656 | 0.47887323943662  | 0                 | 2.00E-04 | 1 | 0.0015 | 0 | NA | NA |
| NR_028347    | FAM183B   | 0.47887323943662  | 0                 | 2.00E-04 | 1 | 0.0015 | 0 | NA | NA |
| NM_153708    | RTP1      | 0.474784189004998 | 0                 | 2.00E-04 | 1 | 0.0015 | 0 | NA | NA |
| NM_001037172 | ACPL2     | 0.474329850068151 | 0                 | 2.00E-04 | 1 | 0.0015 | 0 | NA | NA |
| NM_001282728 | ACPL2     | 0.474329850068151 | 0                 | 2.00E-04 | 1 | 0.0015 | 0 | NA | NA |
| NM_152282    | ACPL2     | 0.474329850068151 | 0                 | 2.00E-04 | 1 | 0.0015 | 0 | NA | NA |
| NM_001284390 | VGLL4     | 0.474329850068151 | 0                 | 2.00E-04 | 1 | 0.0015 | 0 | NA | NA |
| NM_014667    | VGLL4     | 0.474329850068151 | 0                 | 2.00E-04 | 1 | 0.0015 | 0 | NA | NA |
| NM_004505    | USP6      | 0.473875511131304 | 0                 | 2.00E-04 | 1 | 0.0015 | 0 | NA | NA |
| NR_046827    | LNK1-AS2  | 0.473875511131304 | 0                 | 2.00E-04 | 1 | 0.0015 | 0 | NA | NA |
| NM_001926    | DEFA6     | 0.473421172194457 | 0                 | 2.00E-04 | 1 | 0.0015 | 0 | NA | NA |
| NM_138800    | TRIM43    | 0.47296683325761  | 0                 | 2.00E-04 | 1 | 0.0015 | 0 | NA | NA |
| NM_005963    | MYH1      | 0.47296683325761  | 0                 | 2.00E-04 | 1 | 0.0015 | 0 | NA | NA |
| NR_033902    | CCAR2     | 0.47160381644707  | 0                 | 2.00E-04 | 1 | 0.0015 | 0 | NA | NA |
| NR_073396    | ZNF818P   | 0.471149477510223 | 0                 | 2.00E-04 | 1 | 0.0015 | 0 | NA | NA |
| NM_000576    | IL1B      | 0.470695138573376 | 0                 | 2.00E-04 | 1 | 0.0015 | 0 | NA | NA |
| NM_001091    | AOC1      | 0.469786460699682 | 0                 | 2.00E-04 | 1 | 0.0015 | 0 | NA | NA |
| NM_001272072 | AOC1      | 0.469786460699682 | 0                 | 2.00E-04 | 1 | 0.0015 | 0 | NA | NA |
| NM_001166660 | NLGN3     | 0.468877782825988 | 0                 | 2.00E-04 | 1 | 0.0015 | 0 | NA | NA |
| NM_181303    | NLGN3     | 0.468877782825988 | 0                 | 2.00E-04 | 1 | 0.0015 | 0 | NA | NA |
| NM_018977    | NLGN3     | 0.468877782825988 | 0                 | 2.00E-04 | 1 | 0.0015 | 0 | NA | NA |
| NM_024864    | MRM1      | 0.52839618355293  | 0.060881417537483 | 2.00E-04 | 1 | 0.0015 | 0 | NA | NA |
| NM_001251962 | ARHGEF26  | 0.467060427078601 | 0                 | 2.00E-04 | 1 | 0.0015 | 0 | NA | NA |
| NR_027514    | CCNDBP1   | 0.466606088141754 | 0                 | 2.00E-04 | 1 | 0.0015 | 0 | NA | NA |
| NR_027513    | CCNDBP1   | 0.466606088141754 | 0                 | 2.00E-04 | 1 | 0.0015 | 0 | NA | NA |
| NM_012142    | CCNDBP1   | 0.466606088141754 | 0                 | 2.00E-04 | 1 | 0.0015 | 0 | NA | NA |
| NR_045999    | CCNDBP1   | 0.466606088141754 | 0                 | 2.00E-04 | 1 | 0.0015 | 0 | NA | NA |
| NR_045998    | CCNDBP1   | 0.466606088141754 | 0                 | 2.00E-04 | 1 | 0.0015 | 0 | NA | NA |
| NM_007351    | MMRN1     | 0.466606088141754 | 0                 | 2.00E-04 | 1 | 0.0015 | 0 | NA | NA |
| NM_153005    | RIOK1     | 0.46569741026806  | 0                 | 2.00E-04 | 1 | 0.0015 | 0 | NA | NA |
| NM_001137608 | ZNF732    | 0.465243071331213 | 0                 | 2.00E-04 | 1 | 0.0015 | 0 | NA | NA |
| NM_005383    | NEU2      | 0.464334393457519 | 0                 | 2.00E-04 | 1 | 0.0015 | 0 | NA | NA |
| NM_001114598 | ASPDH     | 0.464334393457519 | 0                 | 2.00E-04 | 1 | 0.0015 | 0 | NA | NA |
| NM_000299    | PKP1      | 0.463880054520672 | 0                 | 2.00E-04 | 1 | 0.0015 | 0 | NA | NA |
| NM_001005337 | PKP1      | 0.463880054520672 | 0                 | 2.00E-04 | 1 | 0.0015 | 0 | NA | NA |
| NM_018073    | TRIM68    | 0.463880054520672 | 0                 | 2.00E-04 | 1 | 0.0015 | 0 | NA | NA |
| NM_001004351 | SPDYE3    | 0.463425715583826 | 0                 | 2.00E-04 | 1 | 0.0015 | 0 | NA | NA |

|              |           |                   |                     |          |        |        |        |    |    |
|--------------|-----------|-------------------|---------------------|----------|--------|--------|--------|----|----|
| NM_006331    | EMG1      | 0.462062698773285 | 0                   | 2.00E-04 | 1      | 0.0015 | 0      | NA | NA |
| NM_032260    | RGPD5     | 0.462062698773285 | 0                   | 2.00E-04 | 1      | 0.0015 | 0      | NA | NA |
| NM_032807    | FBXO18    | 0.460245343025897 | 0                   | 2.00E-04 | 1      | 0.0015 | 0      | NA | NA |
| NR_038274    | LINC00933 | 0.45979100408905  | 0                   | 2.00E-04 | 1      | 0.0015 | 0      | NA | NA |
| NR_003088    | ABCC13    | 0.45842798727851  | 0                   | 2.00E-04 | 1      | 0.0015 | 0      | NA | NA |
| NR_003087    | ABCC13    | 0.45842798727851  | 0                   | 2.00E-04 | 1      | 0.0015 | 0      | NA | NA |
| NR_030295    | MIR569    | 0.467514766015448 | 0.00954111767378464 | 2.00E-04 | 1      | 0.0015 | 0      | NA | NA |
| NM_001004459 | OR1S2     | 0.48614266242617  | 0.0286233530213539  | 2.00E-04 | 1      | 0.0015 | 0      | NA | NA |
| NM_001080140 | CT47A7    | 0.456610631531122 | 0                   | 2.00E-04 | 1      | 0.0015 | 0      | NA | NA |
| NM_001005470 | OR4B1     | 0.455247614720582 | 0                   | 2.00E-04 | 1      | 0.0015 | 0      | NA | NA |
| NM_033393    | FHDC1     | 0.454338936846888 | 0                   | 2.00E-04 | 1      | 0.0015 | 0      | NA | NA |
| NM_177551    | HCAR2     | 0.454338936846888 | 0                   | 2.00E-04 | 1      | 0.0015 | 0      | NA | NA |
| NM_145111    | FAM200A   | 0.454338936846888 | 0                   | 2.00E-04 | 1      | 0.0015 | 0      | NA | NA |
| NM_001252043 | TAOK2     | 0.453430258973194 | 0                   | 2.00E-04 | 1      | 0.0015 | 0      | NA | NA |
| NM_016151    | TAOK2     | 0.453430258973194 | 0                   | 2.00E-04 | 1      | 0.0015 | 0      | NA | NA |
| NM_004783    | TAOK2     | 0.453430258973194 | 0                   | 2.00E-04 | 1      | 0.0015 | 0      | NA | NA |
| NM_025188    | TRIM45    | 0.453430258973194 | 0                   | 2.00E-04 | 1      | 0.0015 | 0      | NA | NA |
| NM_001145635 | TRIM45    | 0.453430258973194 | 0                   | 2.00E-04 | 1      | 0.0015 | 0      | NA | NA |
| NM_152375    | KLHDC7A   | 0.452975920036347 | 0                   | 2.00E-04 | 1      | 0.0015 | 0      | NA | NA |
| NM_006063    | KLHL41    | 0.4525215810995   | 0                   | 2.00E-04 | 1      | 0.0015 | 0      | NA | NA |
| NR_024507    | LINC00598 | 0.45115856428896  | 0                   | 2.00E-04 | 1      | 0.0015 | 0      | NA | NA |
| NR_024506    | LINC00598 | 0.45115856428896  | 0                   | 2.00E-04 | 1      | 0.0015 | 0      | NA | NA |
| NR_024505    | LINC00598 | 0.45115856428896  | 0                   | 2.00E-04 | 1      | 0.0015 | 0      | NA | NA |
| NR_024359    | LINC00086 | 0.450704225352113 | 0                   | 2.00E-04 | 1      | 0.0015 | 0      | NA | NA |
| NR_039891    | MIR3064   | 0.449795547478419 | 0                   | 2.00E-04 | 1      | 0.0015 | 0      | NA | NA |
| NM_005582    | CD180     | 0.449795547478419 | 0                   | 2.00E-04 | 1      | 0.0015 | 0      | NA | NA |
| NR_104131    | LINC01057 | 0.449341208541572 | 0                   | 2.00E-04 | 1      | 0.0015 | 0      | NA | NA |
| NM_001005495 | OR2T3     | 0.448886869604725 | 0                   | 2.00E-04 | 1      | 0.0015 | 0      | NA | NA |
| NM_001098169 | BSX       | 0.448432530667878 | 0                   | 2.00E-04 | 1      | 0.0015 | 0      | NA | NA |
| NM_001029869 | PLAC8L1   | 0.448432530667878 | 0                   | 2.00E-04 | 1      | 0.0015 | 0      | NA | NA |
| NM_012450    | SLC13A4   | 0.447978191731031 | 0                   | 2.00E-04 | 1      | 0.0015 | 0      | NA | NA |
| NM_001142477 | NREP      | 0.446615174920491 | 0                   | 2.00E-04 | 1      | 0.0015 | 0      | NA | NA |
| NM_001142476 | NREP      | 0.446615174920491 | 0                   | 2.00E-04 | 1      | 0.0015 | 0      | NA | NA |
| NR_003531    | MEG3      | 0.489323034984098 | 0.0431621990004543  | 2.00E-04 | 1      | 0.0015 | 0      | NA | NA |
| NM_030627    | CPEB4     | 0.445706497046797 | 0                   | 2.00E-04 | 1      | 0.0015 | 0      | NA | NA |
| NM_001199091 | TDRD5     | 0.532485233984552 | 0.0876874148114493  | 2.00E-04 | 1      | 0.0015 | 0      | NA | NA |
| NM_001005747 | CACNB4    | 0.444343480236256 | 0                   | 2.00E-04 | 1      | 0.0015 | 0      | NA | NA |
| NM_021046    | KRTAP5-8  | 0.443889141299409 | 0                   | 2.00E-04 | 1      | 0.0015 | 0      | NA | NA |
| NM_001004461 | OR10A6    | 0.443889141299409 | 0                   | 2.00E-04 | 1      | 0.0015 | 0      | NA | NA |
| NM_199478    | PLP1      | 0.442980463425716 | 0                   | 2.00E-04 | 1      | 0.0015 | 0      | NA | NA |
| NM_000533    | PLP1      | 0.442980463425716 | 0                   | 2.00E-04 | 1      | 0.0015 | 0      | NA | NA |
| NM_005341    | ZBTB48    | 0.441617446615175 | 0                   | 2.00E-04 | 1      | 0.0015 | 0      | NA | NA |
| NM_001278647 | ZBTB48    | 0.441617446615175 | 0                   | 2.00E-04 | 1      | 0.0015 | 0      | NA | NA |
| NM_001278648 | ZBTB48    | 0.441617446615175 | 0                   | 2.00E-04 | 1      | 0.0015 | 0      | NA | NA |
| NR_000011    | SNORA70   | 0.441617446615175 | 0                   | 2.00E-04 | 1      | 0.0015 | 0      | NA | NA |
| NM_201402    | USP17L2   | 0.441617446615175 | 0                   | 0.9952   | 0.0042 | 1      | 0.1548 | NA | NA |
| NM_181605    | KRTAP6-3  | 0.440708768741481 | 0                   | 2.00E-04 | 1      | 0.0015 | 0      | NA | NA |

|              |           |                   |                    |          |   |        |   |    |    |
|--------------|-----------|-------------------|--------------------|----------|---|--------|---|----|----|
| NM_177525    | MEST      | 0.440708768741481 | 0                  | 2.00E-04 | 1 | 0.0015 | 0 | NA | NA |
| NM_001190892 | PDYN      | 0.440708768741481 | 0                  | 2.00E-04 | 1 | 0.0015 | 0 | NA | NA |
| NM_173533    | TDRD5     | 0.532485233984552 | 0.0917764652430713 | 2.00E-04 | 1 | 0.0015 | 0 | NA | NA |
| NM_001199085 | TDRD5     | 0.532485233984552 | 0.0917764652430713 | 2.00E-04 | 1 | 0.0015 | 0 | NA | NA |
| NM_022963    | FGFR4     | 0.439800090867787 | 0                  | 2.00E-04 | 1 | 0.0015 | 0 | NA | NA |
| NM_183399    | RNF14     | 0.43934575193094  | 0                  | 2.00E-04 | 1 | 0.0015 | 0 | NA | NA |
| NM_001201365 | RNF14     | 0.43934575193094  | 0                  | 2.00E-04 | 1 | 0.0015 | 0 | NA | NA |
| NM_001173482 | CRBN      | 0.438891412994094 | 0                  | 2.00E-04 | 1 | 0.0015 | 0 | NA | NA |
| NM_016302    | CRBN      | 0.438891412994094 | 0                  | 2.00E-04 | 1 | 0.0015 | 0 | NA | NA |
| NR_028067    | OR4N3P    | 0.438437074057247 | 0                  | 2.00E-04 | 1 | 0.0015 | 0 | NA | NA |
| NM_022915    | MRPL44    | 0.438437074057247 | 0                  | 2.00E-04 | 1 | 0.0015 | 0 | NA | NA |
| NM_001171095 | CLDN2     | 0.4379827351204   | 0                  | 2.00E-04 | 1 | 0.0015 | 0 | NA | NA |
| NR_002940    | LRRC37A4P | 0.4379827351204   | 0                  | 2.00E-04 | 1 | 0.0015 | 0 | NA | NA |
| NM_000737    | CGB       | 0.4379827351204   | 0                  | 2.00E-04 | 1 | 0.0015 | 0 | NA | NA |
| NM_000370    | TTPA      | 0.437528396183553 | 0                  | 2.00E-04 | 1 | 0.0015 | 0 | NA | NA |
| NM_213601    | TMED8     | 0.437074057246706 | 0                  | 2.00E-04 | 1 | 0.0015 | 0 | NA | NA |
| NM_005218    | DEFB1     | 0.436619718309859 | 0                  | 2.00E-04 | 1 | 0.0015 | 0 | NA | NA |
| NM_080918    | DGUOK     | 0.435711040436165 | 0                  | 2.00E-04 | 1 | 0.0015 | 0 | NA | NA |
| NM_080916    | DGUOK     | 0.435711040436165 | 0                  | 2.00E-04 | 1 | 0.0015 | 0 | NA | NA |
| NR_033360    | MEG3      | 0.489323034984098 | 0.0540663334847796 | 2.00E-04 | 1 | 0.0015 | 0 | NA | NA |
| NR_033359    | MEG3      | 0.489323034984098 | 0.0540663334847796 | 2.00E-04 | 1 | 0.0015 | 0 | NA | NA |
| NR_003530    | MEG3      | 0.489323034984098 | 0.0540663334847796 | 2.00E-04 | 1 | 0.0015 | 0 | NA | NA |
| NR_002766    | MEG3      | 0.489323034984098 | 0.0540663334847796 | 2.00E-04 | 1 | 0.0015 | 0 | NA | NA |
| NR_046468    | MEG3      | 0.489323034984098 | 0.0540663334847796 | 2.00E-04 | 1 | 0.0015 | 0 | NA | NA |
| NR_046467    | MEG3      | 0.489323034984098 | 0.0540663334847796 | 2.00E-04 | 1 | 0.0015 | 0 | NA | NA |
| NR_046465    | MEG3      | 0.489323034984098 | 0.0540663334847796 | 2.00E-04 | 1 | 0.0015 | 0 | NA | NA |
| NR_046464    | MEG3      | 0.489323034984098 | 0.0540663334847796 | 2.00E-04 | 1 | 0.0015 | 0 | NA | NA |
| NR_046473    | MEG3      | 0.489323034984098 | 0.0540663334847796 | 2.00E-04 | 1 | 0.0015 | 0 | NA | NA |
| NR_046472    | MEG3      | 0.489323034984098 | 0.0540663334847796 | 2.00E-04 | 1 | 0.0015 | 0 | NA | NA |
| NR_033358    | MEG3      | 0.489323034984098 | 0.0540663334847796 | 2.00E-04 | 1 | 0.0015 | 0 | NA | NA |
| NR_046466    | MEG3      | 0.489323034984098 | 0.0540663334847796 | 2.00E-04 | 1 | 0.0015 | 0 | NA | NA |
| NR_046469    | MEG3      | 0.489323034984098 | 0.0540663334847796 | 2.00E-04 | 1 | 0.0015 | 0 | NA | NA |
| NR_046471    | MEG3      | 0.489323034984098 | 0.0540663334847796 | 2.00E-04 | 1 | 0.0015 | 0 | NA | NA |
| NR_046470    | MEG3      | 0.489323034984098 | 0.0540663334847796 | 2.00E-04 | 1 | 0.0015 | 0 | NA | NA |
| NM_000042    | APOH      | 0.435256701499318 | 0                  | 2.00E-04 | 1 | 0.0015 | 0 | NA | NA |
| NM_003574    | VAPA      | 0.433439345751931 | 0                  | 2.00E-04 | 1 | 0.0015 | 0 | NA | NA |
| NM_194434    | VAPA      | 0.433439345751931 | 0                  | 2.00E-04 | 1 | 0.0015 | 0 | NA | NA |
| NM_016945    | TAS2R16   | 0.433439345751931 | 0                  | 2.00E-04 | 1 | 0.0015 | 0 | NA | NA |
| NM_001251    | CD68      | 0.432530667878237 | 0                  | 2.00E-04 | 1 | 0.0015 | 0 | NA | NA |
| NM_033183    | CGB8      | 0.432530667878237 | 0                  | 2.00E-04 | 1 | 0.0015 | 0 | NA | NA |
| NM_001040059 | CD68      | 0.43207632894139  | 0                  | 2.00E-04 | 1 | 0.0015 | 0 | NA | NA |
| NM_001270584 | IQCA1     | 0.43207632894139  | 0                  | 2.00E-04 | 1 | 0.0015 | 0 | NA | NA |
| NM_024726    | IQCA1     | 0.43207632894139  | 0                  | 2.00E-04 | 1 | 0.0015 | 0 | NA | NA |
| NR_073043    | IQCA1     | 0.43207632894139  | 0                  | 2.00E-04 | 1 | 0.0015 | 0 | NA | NA |
| NM_001005275 | OR4A15    | 0.431621990004543 | 0                  | 2.00E-04 | 1 | 0.0015 | 0 | NA | NA |
| NM_000304    | PMP22     | 0.502953203089505 | 0.0717855520218083 | 2.00E-04 | 1 | 0.0015 | 0 | NA | NA |
| NR_104017    | PMP22     | 0.502953203089505 | 0.0717855520218083 | 2.00E-04 | 1 | 0.0015 | 0 | NA | NA |

|              |           |                   |                     |          |   |        |   |    |    |
|--------------|-----------|-------------------|---------------------|----------|---|--------|---|----|----|
| NR_104018    | PMP22     | 0.502953203089505 | 0.0717855520218083  | 2.00E-04 | 1 | 0.0015 | 0 | NA | NA |
| NM_001281456 | PMP22     | 0.502953203089505 | 0.0717855520218083  | 2.00E-04 | 1 | 0.0015 | 0 | NA | NA |
| NR_024022    | SETMAR    | 0.43071331213085  | 0                   | 2.00E-04 | 1 | 0.0015 | 0 | NA | NA |
| NM_001010908 | C1QL3     | 0.43071331213085  | 0                   | 2.00E-04 | 1 | 0.0015 | 0 | NA | NA |
| NM_006735    | HOXA2     | 0.43071331213085  | 0                   | 2.00E-04 | 1 | 0.0015 | 0 | NA | NA |
| NM_001006945 | LRIF1     | 0.430258973194003 | 0                   | 2.00E-04 | 1 | 0.0015 | 0 | NA | NA |
| NM_018372    | LRIF1     | 0.430258973194003 | 0                   | 2.00E-04 | 1 | 0.0015 | 0 | NA | NA |
| NM_001001417 | TBC1D3B   | 0.429804634257156 | 0                   | 2.00E-04 | 1 | 0.0015 | 0 | NA | NA |
| NM_006584    | CCT6B     | 0.437528396183553 | 0.00772376192639709 | 2.00E-04 | 1 | 0.0015 | 0 | NA | NA |
| NM_001193530 | CCT6B     | 0.437528396183553 | 0.00772376192639709 | 2.00E-04 | 1 | 0.0015 | 0 | NA | NA |
| NM_001193529 | CCT6B     | 0.437528396183553 | 0.00772376192639709 | 2.00E-04 | 1 | 0.0015 | 0 | NA | NA |
| NM_144712    | SLC23A3   | 0.428895956383462 | 0                   | 2.00E-04 | 1 | 0.0015 | 0 | NA | NA |
| NM_001144889 | SLC23A3   | 0.428895956383462 | 0                   | 2.00E-04 | 1 | 0.0015 | 0 | NA | NA |
| NM_001144890 | SLC23A3   | 0.428895956383462 | 0                   | 2.00E-04 | 1 | 0.0015 | 0 | NA | NA |
| NM_016370    | RAB9B     | 0.428895956383462 | 0                   | 2.00E-04 | 1 | 0.0015 | 0 | NA | NA |
| NR_003260    | DNM1P46   | 0.428441617446615 | 0                   | 2.00E-04 | 1 | 0.0015 | 0 | NA | NA |
| NM_030901    | OR7A17    | 0.428441617446615 | 0                   | 2.00E-04 | 1 | 0.0015 | 0 | NA | NA |
| NM_033033    | KRT82     | 0.427987278509768 | 0                   | 2.00E-04 | 1 | 0.0015 | 0 | NA | NA |
| NM_005495    | SLC17A4   | 0.427532939572921 | 0                   | 2.00E-04 | 1 | 0.0015 | 0 | NA | NA |
| NR_003665    | CRSP8P    | 0.427078600636075 | 0                   | 2.00E-04 | 1 | 0.0015 | 0 | NA | NA |
| NM_002141    | HOXA4     | 0.427078600636075 | 0                   | 2.00E-04 | 1 | 0.0015 | 0 | NA | NA |
| NR_036691    | LOC494127 | 0.426624261699228 | 0                   | 2.00E-04 | 1 | 0.0015 | 0 | NA | NA |
| NM_001172105 | GRAMD1C   | 0.426169922762381 | 0                   | 2.00E-04 | 1 | 0.0015 | 0 | NA | NA |
| NM_001242814 | ANKRD6    | 0.425715583825534 | 0                   | 2.00E-04 | 1 | 0.0015 | 0 | NA | NA |
| NM_001080474 | C2orf78   | 0.425261244888687 | 0                   | 2.00E-04 | 1 | 0.0015 | 0 | NA | NA |
| NM_153690    | FAM43A    | 0.425261244888687 | 0                   | 2.00E-04 | 1 | 0.0015 | 0 | NA | NA |
| NM_021174    | CCAR2     | 0.42480690595184  | 0                   | 2.00E-04 | 1 | 0.0015 | 0 | NA | NA |
| NM_014050    | MRPL42    | 0.442980463425716 | 0.0186278964107224  | 2.00E-04 | 1 | 0.0015 | 0 | NA | NA |
| NM_172177    | MRPL42    | 0.442980463425716 | 0.0186278964107224  | 2.00E-04 | 1 | 0.0015 | 0 | NA | NA |
| NR_038161    | MRPL42    | 0.442980463425716 | 0.0186278964107224  | 2.00E-04 | 1 | 0.0015 | 0 | NA | NA |
| NR_038160    | MRPL42    | 0.442980463425716 | 0.0186278964107224  | 2.00E-04 | 1 | 0.0015 | 0 | NA | NA |
| NR_038159    | MRPL42    | 0.442980463425716 | 0.0186278964107224  | 2.00E-04 | 1 | 0.0015 | 0 | NA | NA |
| NM_138434    | ZBED6CL   | 0.424352567014993 | 0                   | 2.00E-04 | 1 | 0.0015 | 0 | NA | NA |
| NM_001017970 | TMEM30B   | 0.423443889141299 | 0                   | 2.00E-04 | 1 | 0.0015 | 0 | NA | NA |
| NM_001145121 | TCP10L2   | 0.422989550204453 | 0                   | 2.00E-04 | 1 | 0.0015 | 0 | NA | NA |
| NM_001873    | CPE       | 0.422080872330759 | 0                   | 2.00E-04 | 1 | 0.0015 | 0 | NA | NA |
| NM_001278319 | LILRA1    | 0.421626533393912 | 0                   | 2.00E-04 | 1 | 0.0015 | 0 | NA | NA |
| NR_003666    | SPDYE7P   | 0.421626533393912 | 0                   | 2.00E-04 | 1 | 0.0015 | 0 | NA | NA |
| NM_001169118 | STIM2     | 0.421172194457065 | 0                   | 2.00E-04 | 1 | 0.0015 | 0 | NA | NA |
| NM_001169117 | STIM2     | 0.421172194457065 | 0                   | 2.00E-04 | 1 | 0.0015 | 0 | NA | NA |
| NM_020860    | STIM2     | 0.421172194457065 | 0                   | 2.00E-04 | 1 | 0.0015 | 0 | NA | NA |
| NM_020525    | IL22      | 0.421172194457065 | 0                   | 2.00E-04 | 1 | 0.0015 | 0 | NA | NA |
| NM_018647    | TNFRSF19  | 0.420717855520218 | 0                   | 2.00E-04 | 1 | 0.0015 | 0 | NA | NA |
| NM_001204458 | TNFRSF19  | 0.420717855520218 | 0                   | 2.00E-04 | 1 | 0.0015 | 0 | NA | NA |
| NM_000270    | PNP       | 0.420263516583371 | 0                   | 2.00E-04 | 1 | 0.0015 | 0 | NA | NA |
| NM_001033583 | ACOT9     | 0.420263516583371 | 0                   | 2.00E-04 | 1 | 0.0015 | 0 | NA | NA |
| NM_001037171 | ACOT9     | 0.420263516583371 | 0                   | 2.00E-04 | 1 | 0.0015 | 0 | NA | NA |

|              |           |                   |                    |          |   |        |          |    |    |
|--------------|-----------|-------------------|--------------------|----------|---|--------|----------|----|----|
| NR_046249    | GM140     | 0.418900499772831 | 0                  | 2.00E-04 | 1 | 0.0015 | 0        | NA | NA |
| NM_006552    | SCGB1D1   | 0.418900499772831 | 0                  | 2.00E-04 | 1 | 0.0015 | 0        | NA | NA |
| NM_001887    | CRYBB1    | 0.418446160835984 | 0                  | 2.00E-04 | 1 | 0.0015 | 0        | NA | NA |
| NR_044994    | CTAGE7P   | 0.417991821899137 | 0                  | 2.00E-04 | 1 | 0.0015 | 0        | NA | NA |
| NM_017757    | ZNF407    | 0.417991821899137 | 0                  | 2.00E-04 | 1 | 0.0015 | 0        | NA | NA |
| NM_001146189 | ZNF407    | 0.417991821899137 | 0                  | 2.00E-04 | 1 | 0.0015 | 0        | NA | NA |
| NM_001146190 | ZNF407    | 0.417991821899137 | 0                  | 2.00E-04 | 1 | 0.0015 | 0        | NA | NA |
| NM_014793    | LCMT2     | 0.417991821899137 | 0                  | 2.00E-04 | 1 | 0.0015 | 0        | NA | NA |
| NM_001123363 | RGPD6     | 0.41753748296229  | 0                  | 2.00E-04 | 1 | 0.0015 | 0        | NA | NA |
| NM_201631    | TGM5      | 0.41753748296229  | 0                  | 4.00E-04 | 1 | 0.0037 | 1.00E-04 | NA | NA |
| NM_004245    | TGM5      | 0.41753748296229  | 0                  | 2.00E-04 | 1 | 0.0015 | 0        | NA | NA |
| NM_013260    | SAP30BP   | 0.477055883689232 | 0.060881417537483  | 2.00E-04 | 1 | 0.0015 | 0        | NA | NA |
| NM_001640    | APEH      | 0.416174466151749 | 0                  | 2.00E-04 | 1 | 0.0015 | 0        | NA | NA |
| NM_058173    | MUCL1     | 0.415720127214902 | 0                  | 2.00E-04 | 1 | 0.0015 | 0        | NA | NA |
| NM_001546    | ID4       | 0.415720127214902 | 0                  | 2.00E-04 | 1 | 0.0015 | 0        | NA | NA |
| NM_031962    | KRTAP9-3  | 0.415265788278055 | 0                  | 2.00E-04 | 1 | 0.0015 | 0        | NA | NA |
| NM_001007537 | C1QTNF9B  | 0.415265788278055 | 0                  | 2.00E-04 | 1 | 0.0015 | 0        | NA | NA |
| NM_005454    | CER1      | 0.415265788278055 | 0                  | 2.00E-04 | 1 | 0.0015 | 0        | NA | NA |
| NM_031277    | RNF17     | 0.414811449341209 | 0                  | 2.00E-04 | 1 | 0.0015 | 0        | NA | NA |
| NM_001184993 | RNF17     | 0.414811449341209 | 0                  | 2.00E-04 | 1 | 0.0015 | 0        | NA | NA |
| NM_178833    | SLC9B2    | 0.414811449341209 | 0                  | 2.00E-04 | 1 | 0.0015 | 0        | NA | NA |
| NM_175733    | SYT9      | 0.414357110404362 | 0                  | 2.00E-04 | 1 | 0.0015 | 0        | NA | NA |
| NM_033191    | KRTAP9-4  | 0.414357110404362 | 0                  | 2.00E-04 | 1 | 0.0015 | 0        | NA | NA |
| NM_014897    | ZNF652    | 0.413902771467515 | 0                  | 2.00E-04 | 1 | 0.0015 | 0        | NA | NA |
| NM_001145365 | ZNF652    | 0.413902771467515 | 0                  | 2.00E-04 | 1 | 0.0015 | 0        | NA | NA |
| NM_001242729 | ARHGEF38  | 0.412994093593821 | 0                  | 2.00E-04 | 1 | 0.0015 | 0        | NA | NA |
| NM_017700    | ARHGEF38  | 0.412994093593821 | 0                  | 2.00E-04 | 1 | 0.0015 | 0        | NA | NA |
| NM_000074    | CD40LG    | 0.412994093593821 | 0                  | 2.00E-04 | 1 | 0.0015 | 0        | NA | NA |
| NM_006536    | CLCA2     | 0.412539754656974 | 0                  | 2.00E-04 | 1 | 0.0015 | 0        | NA | NA |
| NM_022090    | C5orf54   | 0.412539754656974 | 0                  | 2.00E-04 | 1 | 0.0015 | 0        | NA | NA |
| NM_173804    | TMEM86B   | 0.435711040436165 | 0.0231712857791913 | 2.00E-04 | 1 | 0.0015 | 0        | NA | NA |
| NM_004326    | BCL9      | 0.412085415720127 | 0                  | 2.00E-04 | 1 | 0.0015 | 0        | NA | NA |
| NM_194324    | TMSB15B   | 0.412085415720127 | 0                  | 2.00E-04 | 1 | 0.0015 | 0        | NA | NA |
| NM_024865    | NANOG     | 0.410722398909587 | 0                  | 2.00E-04 | 1 | 0.0015 | 0        | NA | NA |
| NM_148908    | OSBPL9    | 0.41026805997274  | 0                  | 2.00E-04 | 1 | 0.0015 | 0        | NA | NA |
| NM_148906    | OSBPL9    | 0.41026805997274  | 0                  | 2.00E-04 | 1 | 0.0015 | 0        | NA | NA |
| NR_036662    | OSBPL9    | 0.41026805997274  | 0                  | 2.00E-04 | 1 | 0.0015 | 0        | NA | NA |
| NM_024586    | OSBPL9    | 0.41026805997274  | 0                  | 2.00E-04 | 1 | 0.0015 | 0        | NA | NA |
| NM_148909    | OSBPL9    | 0.41026805997274  | 0                  | 2.00E-04 | 1 | 0.0015 | 0        | NA | NA |
| NM_001105522 | TRIM49D2P | 0.41026805997274  | 0                  | 2.00E-04 | 1 | 0.0015 | 0        | NA | NA |
| NM_001178131 | EGF       | 0.41026805997274  | 0                  | 2.00E-04 | 1 | 0.0015 | 0        | NA | NA |
| NM_001963    | EGF       | 0.41026805997274  | 0                  | 2.00E-04 | 1 | 0.0015 | 0        | NA | NA |
| NM_001178130 | EGF       | 0.41026805997274  | 0                  | 2.00E-04 | 1 | 0.0015 | 0        | NA | NA |
| NM_053049    | UCN3      | 0.409359382099046 | 0                  | 2.00E-04 | 1 | 0.0015 | 0        | NA | NA |
| NM_025261    | LY6G6C    | 0.409359382099046 | 0                  | 2.00E-04 | 1 | 0.0015 | 0        | NA | NA |
| NM_014697    | NOS1AP    | 0.408905043162199 | 0                  | 2.00E-04 | 1 | 0.0015 | 0        | NA | NA |
| NM_001164757 | NOS1AP    | 0.408905043162199 | 0                  | 2.00E-04 | 1 | 0.0015 | 0        | NA | NA |

|              |                 |                   |                    |          |        |        |          |    |    |
|--------------|-----------------|-------------------|--------------------|----------|--------|--------|----------|----|----|
| NM_020187    | <i>HMCES</i>    | 0.408450704225352 | 0                  | 2.00E-04 | 1      | 0.0015 | 0        | NA | NA |
| NM_001006109 | <i>HMCES</i>    | 0.408450704225352 | 0                  | 2.00E-04 | 1      | 0.0015 | 0        | NA | NA |
| NR_026773    | <i>C6orf123</i> | 0.408450704225352 | 0                  | 2.00E-04 | 1      | 0.0015 | 0        | NA | NA |
| NR_002140    | <i>OR6W1P</i>   | 0.408450704225352 | 0                  | 2.00E-04 | 1      | 0.0015 | 0        | NA | NA |
| NR_034158    | <i>NUP210P1</i> | 0.407542026351658 | 0                  | 2.00E-04 | 1      | 0.0015 | 0        | NA | NA |
| NM_016134    | <i>CPQ</i>      | 0.407542026351658 | 0                  | 2.00E-04 | 1      | 0.0015 | 0        | NA | NA |
| NM_178821    | <i>DAW1</i>     | 0.407087687414811 | 0                  | 2.00E-04 | 1      | 0.0015 | 0        | NA | NA |
| NM_001098501 | <i>KIAA1217</i> | 0.406633348477965 | 0                  | 2.00E-04 | 1      | 0.0015 | 0        | NA | NA |
| NM_001282767 | <i>KIAA1217</i> | 0.406633348477965 | 0                  | 2.00E-04 | 1      | 0.0015 | 0        | NA | NA |
| NM_001282768 | <i>KIAA1217</i> | 0.406633348477965 | 0                  | 2.00E-04 | 1      | 0.0015 | 0        | NA | NA |
| NM_019590    | <i>KIAA1217</i> | 0.406633348477965 | 0                  | 2.00E-04 | 1      | 0.0015 | 0        | NA | NA |
| NM_003845    | <i>DYRK4</i>    | 0.406633348477965 | 0                  | 2.00E-04 | 1      | 0.0015 | 0        | NA | NA |
| NR_104115    | <i>DYRK4</i>    | 0.406633348477965 | 0                  | 2.00E-04 | 1      | 0.0015 | 0        | NA | NA |
| NM_001198617 | <i>MAP7</i>     | 0.406633348477965 | 0                  | 2.00E-04 | 1      | 0.0015 | 0        | NA | NA |
| NM_001198616 | <i>MAP7</i>     | 0.406633348477965 | 0                  | 2.00E-04 | 1      | 0.0015 | 0        | NA | NA |
| NM_003980    | <i>MAP7</i>     | 0.406633348477965 | 0                  | 2.00E-04 | 1      | 0.0015 | 0        | NA | NA |
| NM_001256567 | <i>CHRNB4</i>   | 0.405270331667424 | 0                  | 2.00E-04 | 1      | 0.0015 | 0        | NA | NA |
| NM_000750    | <i>CHRNB4</i>   | 0.405270331667424 | 0                  | 2.00E-04 | 1      | 0.0015 | 0        | NA | NA |
| NM_001127365 | <i>FAM221A</i>  | 0.404815992730577 | 0                  | 2.00E-04 | 1      | 0.0015 | 0        | NA | NA |
| NM_001127364 | <i>FAM221A</i>  | 0.404815992730577 | 0                  | 2.00E-04 | 1      | 0.0015 | 0        | NA | NA |
| NM_199136    | <i>FAM221A</i>  | 0.404815992730577 | 0                  | 2.00E-04 | 1      | 0.0015 | 0        | NA | NA |
| NM_004310    | <i>RHOH</i>     | 0.40436165379373  | 0                  | 2.00E-04 | 1      | 0.0015 | 0        | NA | NA |
| NM_001278360 | <i>RHOH</i>     | 0.40436165379373  | 0                  | 2.00E-04 | 1      | 0.0015 | 0        | NA | NA |
| NM_001278359 | <i>RHOH</i>     | 0.40436165379373  | 0                  | 2.00E-04 | 1      | 0.0015 | 0        | NA | NA |
| NM_001278363 | <i>RHOH</i>     | 0.40436165379373  | 0                  | 2.00E-04 | 1      | 0.0015 | 0        | NA | NA |
| NM_001278362 | <i>RHOH</i>     | 0.40436165379373  | 0                  | 2.00E-04 | 1      | 0.0015 | 0        | NA | NA |
| NM_001278361 | <i>RHOH</i>     | 0.40436165379373  | 0                  | 2.00E-04 | 1      | 0.0015 | 0        | NA | NA |
| NM_004844    | <i>SH3BP5</i>   | 0.40436165379373  | 0                  | 2.00E-04 | 1      | 0.0015 | 0        | NA | NA |
| NM_001134433 | <i>AZI2</i>     | 0.40436165379373  | 0                  | 2.00E-04 | 1      | 0.0015 | 0        | NA | NA |
| NM_001134432 | <i>AZI2</i>     | 0.40436165379373  | 0                  | 2.00E-04 | 1      | 0.0015 | 0        | NA | NA |
| NM_022461    | <i>AZI2</i>     | 0.40436165379373  | 0                  | 2.00E-04 | 1      | 0.0015 | 0        | NA | NA |
| NM_001271650 | <i>AZI2</i>     | 0.40436165379373  | 0                  | 2.00E-04 | 1      | 0.0015 | 0        | NA | NA |
| NM_001201428 | <i>GORASP2</i>  | 0.403907314856883 | 0                  | 2.00E-04 | 1      | 0.0015 | 0        | NA | NA |
| NM_015530    | <i>GORASP2</i>  | 0.403907314856883 | 0                  | 2.00E-04 | 1      | 0.0015 | 0        | NA | NA |
| NM_007160    | <i>OR2H2</i>    | 0.423898228078146 | 0.0204452521581099 | 2.00E-04 | 1      | 0.0015 | 0        | NA | NA |
| NR_002964    | <i>SNORA28</i>  | 0.403452975920036 | 0                  | 2.00E-04 | 1      | 0.0015 | 0        | NA | NA |
| NM_006175    | <i>NRAP</i>     | 0.403452975920036 | 0                  | 2.00E-04 | 1      | 0.0015 | 0        | NA | NA |
| NM_198060    | <i>NRAP</i>     | 0.403452975920036 | 0                  | 2.00E-04 | 1      | 0.0015 | 0        | NA | NA |
| NM_001261463 | <i>NRAP</i>     | 0.403452975920036 | 0                  | 2.00E-04 | 1      | 0.0015 | 0        | NA | NA |
| NM_002981    | <i>CCL1</i>     | 0.403452975920036 | 0                  | 2.00E-04 | 1      | 0.0015 | 0        | NA | NA |
| NM_000594    | <i>TNF</i>      | 0.472058155383916 | 0.0699681962744207 | 0.0012   | 0.9994 | 0.0072 | 2.00E-04 | NA | NA |
| NM_080743    | <i>SRSF12</i>   | 0.401635620172649 | 0                  | 2.00E-04 | 1      | 0.0015 | 0        | NA | NA |
| NM_032307    | <i>C9orf64</i>  | 0.401635620172649 | 0                  | 2.00E-04 | 1      | 0.0015 | 0        | NA | NA |
| NM_001584    | <i>MPPED2</i>   | 0.401181281235802 | 0                  | 2.00E-04 | 1      | 0.0015 | 0        | NA | NA |
| NM_001034172 | <i>SLC25A52</i> | 0.401181281235802 | 0                  | 2.00E-04 | 1      | 0.0015 | 0        | NA | NA |
| NR_026664    | <i>MGC16025</i> | 0.401181281235802 | 0                  | 2.00E-04 | 1      | 0.0015 | 0        | NA | NA |
| NM_005458    | <i>GABBR2</i>   | 0.401181281235802 | 0                  | 2.00E-04 | 1      | 0.0015 | 0        | NA | NA |

|              |           |                   |                   |          |   |        |   |    |    |
|--------------|-----------|-------------------|-------------------|----------|---|--------|---|----|----|
| NR_026799    | SH3GL3    | 0.400726942298955 | 0                 | 2.00E-04 | 1 | 0.0015 | 0 | NA | NA |
| NM_003027    | SH3GL3    | 0.400726942298955 | 0                 | 2.00E-04 | 1 | 0.0015 | 0 | NA | NA |
| NM_005486    | TOM1L1    | 0.400726942298955 | 0                 | 2.00E-04 | 1 | 0.0015 | 0 | NA | NA |
| NR_104292    | TBC1D22A  | 0.400726942298955 | 0                 | 2.00E-04 | 1 | 0.0015 | 0 | NA | NA |
| NM_020531    | APMAP     | 0.400726942298955 | 0                 | 2.00E-04 | 1 | 0.0015 | 0 | NA | NA |
| NR_024066    | CLRN1-AS1 | 0.51385733757383  | 0.114039073148569 | 2.00E-04 | 1 | 0.0015 | 0 | NA | NA |
| NM_004408    | DNM1      | 0.399818264425261 | 0                 | 2.00E-04 | 1 | 0.0015 | 0 | NA | NA |
| NM_001005336 | DNM1      | 0.399818264425261 | 0                 | 2.00E-04 | 1 | 0.0015 | 0 | NA | NA |
| NM_012205    | HAAO      | 0.537028623353021 | 0.137664697864607 | 2.00E-04 | 1 | 0.0015 | 0 | NA | NA |
| NM_139169    | TRUB1     | 0.399363925488414 | 0                 | 2.00E-04 | 1 | 0.0015 | 0 | NA | NA |
| NM_175723    | SSX5      | 0.399363925488414 | 0                 | 2.00E-04 | 1 | 0.0015 | 0 | NA | NA |
| NM_021015    | SSX5      | 0.399363925488414 | 0                 | 2.00E-04 | 1 | 0.0015 | 0 | NA | NA |
| NM_001184749 | SLITRK4   | 0.399363925488414 | 0                 | 2.00E-04 | 1 | 0.0015 | 0 | NA | NA |
| NM_031961    | KRTAP9-2  | 0.398909586551567 | 0                 | 2.00E-04 | 1 | 0.0015 | 0 | NA | NA |
| NM_001008397 | GPX8      | 0.398909586551567 | 0                 | 2.00E-04 | 1 | 0.0015 | 0 | NA | NA |
| NM_012378    | OR8B8     | 0.398909586551567 | 0                 | 2.00E-04 | 1 | 0.0015 | 0 | NA | NA |
| NM_004965    | HMGN1     | 0.398909586551567 | 0                 | 2.00E-04 | 1 | 0.0015 | 0 | NA | NA |
| NM_170665    | ATP2A2    | 0.398455247614721 | 0                 | 2.00E-04 | 1 | 0.0015 | 0 | NA | NA |
| NM_001681    | ATP2A2    | 0.398455247614721 | 0                 | 2.00E-04 | 1 | 0.0015 | 0 | NA | NA |
| NM_152453    | TMCOSA    | 0.398455247614721 | 0                 | 2.00E-04 | 1 | 0.0015 | 0 | NA | NA |
| NM_001079538 | XAGE2B    | 0.398455247614721 | 0                 | 2.00E-04 | 1 | 0.0015 | 0 | NA | NA |
| NM_001077203 | SENP7     | 0.398455247614721 | 0                 | 2.00E-04 | 1 | 0.0015 | 0 | NA | NA |
| NM_001282801 | SENP7     | 0.398455247614721 | 0                 | 2.00E-04 | 1 | 0.0015 | 0 | NA | NA |
| NM_001282802 | SENP7     | 0.398455247614721 | 0                 | 2.00E-04 | 1 | 0.0015 | 0 | NA | NA |
| NM_001282803 | SENP7     | 0.398455247614721 | 0                 | 2.00E-04 | 1 | 0.0015 | 0 | NA | NA |
| NM_020654    | SENP7     | 0.398455247614721 | 0                 | 2.00E-04 | 1 | 0.0015 | 0 | NA | NA |
| NM_001282804 | SENP7     | 0.398455247614721 | 0                 | 2.00E-04 | 1 | 0.0015 | 0 | NA | NA |
| NM_002099    | GYPA      | 0.398455247614721 | 0                 | 2.00E-04 | 1 | 0.0015 | 0 | NA | NA |
| NM_019045    | WDR44     | 0.397546569741027 | 0                 | 2.00E-04 | 1 | 0.0015 | 0 | NA | NA |
| NM_001184966 | WDR44     | 0.397546569741027 | 0                 | 2.00E-04 | 1 | 0.0015 | 0 | NA | NA |
| NM_001184965 | WDR44     | 0.397546569741027 | 0                 | 2.00E-04 | 1 | 0.0015 | 0 | NA | NA |
| NM_001276    | CHI3L1    | 0.397546569741027 | 0                 | 2.00E-04 | 1 | 0.0015 | 0 | NA | NA |
| NM_020805    | KLHL14    | 0.397546569741027 | 0                 | 2.00E-04 | 1 | 0.0015 | 0 | NA | NA |
| NM_000206    | IL2RG     | 0.397546569741027 | 0                 | 2.00E-04 | 1 | 0.0015 | 0 | NA | NA |
| NM_001130713 | LEF1      | 0.39709223080418  | 0                 | 2.00E-04 | 1 | 0.0015 | 0 | NA | NA |
| NM_001130714 | LEF1      | 0.39709223080418  | 0                 | 2.00E-04 | 1 | 0.0015 | 0 | NA | NA |
| NM_016269    | LEF1      | 0.39709223080418  | 0                 | 2.00E-04 | 1 | 0.0015 | 0 | NA | NA |
| NM_172314    | IL25      | 0.396637891867333 | 0                 | 2.00E-04 | 1 | 0.0015 | 0 | NA | NA |
| NM_022789    | IL25      | 0.396637891867333 | 0                 | 2.00E-04 | 1 | 0.0015 | 0 | NA | NA |
| NM_001099283 | ZNF239    | 0.396637891867333 | 0                 | 2.00E-04 | 1 | 0.0015 | 0 | NA | NA |
| NM_001099282 | ZNF239    | 0.396637891867333 | 0                 | 2.00E-04 | 1 | 0.0015 | 0 | NA | NA |
| NM_001099284 | ZNF239    | 0.396637891867333 | 0                 | 2.00E-04 | 1 | 0.0015 | 0 | NA | NA |
| NM_152430    | OR51E1    | 0.396183552930486 | 0                 | 2.00E-04 | 1 | 0.0015 | 0 | NA | NA |
| NM_001080503 | CCDC159   | 0.396183552930486 | 0                 | 2.00E-04 | 1 | 0.0015 | 0 | NA | NA |
| NM_017785    | SPDL1     | 0.512948659700136 | 0.117219445706497 | 2.00E-04 | 1 | 0.0015 | 0 | NA | NA |
| NM_080738    | EDARADD   | 0.395729213993639 | 0                 | 2.00E-04 | 1 | 0.0015 | 0 | NA | NA |
| NM_024854    | PYROXD1   | 0.395729213993639 | 0                 | 2.00E-04 | 1 | 0.0015 | 0 | NA | NA |

|              |           |                   |                    |          |        |        |        |    |    |
|--------------|-----------|-------------------|--------------------|----------|--------|--------|--------|----|----|
| NM_080615    | GCNT7     | 0.395274875056792 | 0                  | 2.00E-04 | 1      | 0.0015 | 0      | NA | NA |
| NM_145861    | EDARADD   | 0.394820536119945 | 0                  | 2.00E-04 | 1      | 0.0015 | 0      | NA | NA |
| NM_033448    | KRT71     | 0.394820536119945 | 0                  | 2.00E-04 | 1      | 0.0015 | 0      | NA | NA |
| NM_001256871 | USP17L3   | 0.394820536119945 | 0                  | 0.9954   | 0.0046 | 1      | 0.1549 | NA | NA |
| NM_001015001 | CKMT1A    | 0.394366197183099 | 0                  | 2.00E-04 | 1      | 0.0015 | 0      | NA | NA |
| NM_001146037 | SLC14A1   | 0.393003180372558 | 0                  | 2.00E-04 | 1      | 0.0015 | 0      | NA | NA |
| NM_001017534 | CARD16    | 0.393003180372558 | 0                  | 2.00E-04 | 1      | 0.0015 | 0      | NA | NA |
| NM_052889    | CARD16    | 0.393003180372558 | 0                  | 2.00E-04 | 1      | 0.0015 | 0      | NA | NA |
| NM_001136131 | APP       | 0.392548841435711 | 0                  | 2.00E-04 | 1      | 0.0015 | 0      | NA | NA |
| NM_001136129 | APP       | 0.392548841435711 | 0                  | 2.00E-04 | 1      | 0.0015 | 0      | NA | NA |
| NM_001204301 | APP       | 0.392548841435711 | 0                  | 2.00E-04 | 1      | 0.0015 | 0      | NA | NA |
| NM_001204303 | APP       | 0.392548841435711 | 0                  | 2.00E-04 | 1      | 0.0015 | 0      | NA | NA |
| NM_000484    | APP       | 0.392548841435711 | 0                  | 2.00E-04 | 1      | 0.0015 | 0      | NA | NA |
| NM_201414    | APP       | 0.392548841435711 | 0                  | 2.00E-04 | 1      | 0.0015 | 0      | NA | NA |
| NM_001136130 | APP       | 0.392548841435711 | 0                  | 2.00E-04 | 1      | 0.0015 | 0      | NA | NA |
| NM_001204302 | APP       | 0.392548841435711 | 0                  | 2.00E-04 | 1      | 0.0015 | 0      | NA | NA |
| NM_201413    | APP       | 0.392548841435711 | 0                  | 2.00E-04 | 1      | 0.0015 | 0      | NA | NA |
| NM_001164434 | KRTAP22-2 | 0.407996365288505 | 0.0154475238527942 | 2.00E-04 | 1      | 0.0015 | 0      | NA | NA |
| NR_033861    | LINC00514 | 0.392094502498864 | 0                  | 0.005    | 0.9948 | 0.0249 | 0.001  | NA | NA |
| NM_033127    | SEC16B    | 0.391640163562017 | 0                  | 2.00E-04 | 1      | 0.0015 | 0      | NA | NA |
| NM_001163499 | FBXO24    | 0.39118582462517  | 0                  | 2.00E-04 | 1      | 0.0015 | 0      | NA | NA |
| NM_012172    | FBXO24    | 0.39118582462517  | 0                  | 2.00E-04 | 1      | 0.0015 | 0      | NA | NA |
| NM_024569    | MPZL1     | 0.390731485688323 | 0                  | 2.00E-04 | 1      | 0.0015 | 0      | NA | NA |
| NM_003953    | MPZL1     | 0.390731485688323 | 0                  | 2.00E-04 | 1      | 0.0015 | 0      | NA | NA |
| NM_001146191 | MPZL1     | 0.390731485688323 | 0                  | 2.00E-04 | 1      | 0.0015 | 0      | NA | NA |
| NM_153368    | GJD4      | 0.390731485688323 | 0                  | 2.00E-04 | 1      | 0.0015 | 0      | NA | NA |
| NM_000463    | UGT1A1    | 0.390731485688323 | 0                  | 2.00E-04 | 1      | 0.0015 | 0      | NA | NA |
| NM_001105244 | PTPRM     | 0.38982280781463  | 0                  | 2.00E-04 | 1      | 0.0015 | 0      | NA | NA |
| NM_002845    | PTPRM     | 0.38982280781463  | 0                  | 2.00E-04 | 1      | 0.0015 | 0      | NA | NA |
| NM_000767    | CYP2B6    | 0.38982280781463  | 0                  | 2.00E-04 | 1      | 0.0015 | 0      | NA | NA |
| NR_024163    | CKS1B     | 0.389368468877783 | 0                  | 2.00E-04 | 1      | 0.0015 | 0      | NA | NA |
| NM_001826    | CKS1B     | 0.389368468877783 | 0                  | 2.00E-04 | 1      | 0.0015 | 0      | NA | NA |
| NM_133447    | AGAP11    | 0.389368468877783 | 0                  | 2.00E-04 | 1      | 0.0015 | 0      | NA | NA |
| NR_039969    | MIR5047   | 0.399818264425261 | 0.0104497955474784 | 2.00E-04 | 1      | 0.0015 | 0      | NA | NA |
| NM_001134939 | OAZ3      | 0.388459791004089 | 0                  | 2.00E-04 | 1      | 0.0015 | 0      | NA | NA |
| NM_014717    | ZNF536    | 0.388459791004089 | 0                  | 2.00E-04 | 1      | 0.0015 | 0      | NA | NA |
| NM_004077    | CS        | 0.388005452067242 | 0                  | 2.00E-04 | 1      | 0.0015 | 0      | NA | NA |
| NM_017922    | PRPF39    | 0.387551113130395 | 0                  | 2.00E-04 | 1      | 0.0015 | 0      | NA | NA |
| NM_005421    | TAL2      | 0.387551113130395 | 0                  | 2.00E-04 | 1      | 0.0015 | 0      | NA | NA |
| NM_001142538 | LGALS12   | 0.387096774193548 | 0                  | 2.00E-04 | 1      | 0.0015 | 0      | NA | NA |
| NM_001142537 | LGALS12   | 0.387096774193548 | 0                  | 2.00E-04 | 1      | 0.0015 | 0      | NA | NA |
| NR_024128    | OR3A4P    | 0.387096774193548 | 0                  | 2.00E-04 | 1      | 0.0015 | 0      | NA | NA |
| NM_001277307 | MAGEB17   | 0.387096774193548 | 0                  | 2.00E-04 | 1      | 0.0015 | 0      | NA | NA |
| NM_030568    | KHDC1     | 0.387096774193548 | 0                  | 2.00E-04 | 1      | 0.0015 | 0      | NA | NA |
| NM_001004697 | OR2T5     | 0.386642435256701 | 0                  | 2.00E-04 | 1      | 0.0015 | 0      | NA | NA |
| NM_006993    | NPM3      | 0.499772830531577 | 0.113584734211722  | 2.00E-04 | 1      | 0.0015 | 0      | NA | NA |
| NR_040037    | PTOV1-AS1 | 0.386188096319855 | 0                  | 2.00E-04 | 1      | 0.0015 | 0      | NA | NA |



|              |           |                   |                    |          |   |        |          |    |    |
|--------------|-----------|-------------------|--------------------|----------|---|--------|----------|----|----|
| NM_153182    | MINA      | 0.386188096319855 | 0                  | 2.00E-04 | 1 | 0.0015 | 0        | NA | NA |
| NM_001042533 | MINA      | 0.386188096319855 | 0                  | 2.00E-04 | 1 | 0.0015 | 0        | NA | NA |
| NM_032778    | MINA      | 0.386188096319855 | 0                  | 2.00E-04 | 1 | 0.0015 | 0        | NA | NA |
| NM_001261829 | MINA      | 0.386188096319855 | 0                  | 2.00E-04 | 1 | 0.0015 | 0        | NA | NA |
| NM_002546    | TNFRSF11B | 0.386188096319855 | 0                  | 2.00E-04 | 1 | 0.0015 | 0        | NA | NA |
| NM_017878    | HRASLS2   | 0.385733757383008 | 0                  | 2.00E-04 | 1 | 0.0015 | 0        | NA | NA |
| NM_001851    | COL9A1    | 0.385733757383008 | 0                  | 2.00E-04 | 1 | 0.0015 | 0        | NA | NA |
| NR_003072    | SNORD91A  | 0.385279418446161 | 0                  | 2.00E-04 | 1 | 0.0015 | 0        | NA | NA |
| NM_199290    | NACA2     | 0.385279418446161 | 0                  | 2.00E-04 | 1 | 0.0015 | 0        | NA | NA |
| NR_015451    | LINC00294 | 0.384825079509314 | 0                  | 2.00E-04 | 1 | 0.0015 | 0        | NA | NA |
| NM_152501    | PYHIN1    | 0.384370740572467 | 0                  | 2.00E-04 | 1 | 0.0015 | 0        | NA | NA |
| NM_198928    | PYHIN1    | 0.384370740572467 | 0                  | 2.00E-04 | 1 | 0.0015 | 0        | NA | NA |
| NM_198930    | PYHIN1    | 0.384370740572467 | 0                  | 2.00E-04 | 1 | 0.0015 | 0        | NA | NA |
| NM_198929    | PYHIN1    | 0.384370740572467 | 0                  | 2.00E-04 | 1 | 0.0015 | 0        | NA | NA |
| NM_178019    | CATSPER3  | 0.384370740572467 | 0                  | 2.00E-04 | 1 | 0.0015 | 0        | NA | NA |
| NM_006250    | PRH1      | 0.384370740572467 | 0                  | 2.00E-04 | 1 | 0.0015 | 0        | NA | NA |
| NR_003554    | USP32P2   | 0.384370740572467 | 0                  | 2.00E-04 | 1 | 0.0015 | 0        | NA | NA |
| NM_021976    | RXRБ      | 0.384370740572467 | 0                  | 2.00E-04 | 1 | 0.0015 | 0        | NA | NA |
| NM_001270401 | RXRБ      | 0.384370740572467 | 0                  | 2.00E-04 | 1 | 0.0015 | 0        | NA | NA |
| NR_015368    | LOC643837 | 0.383462062698773 | 0                  | 2.00E-04 | 1 | 0.0015 | 0        | NA | NA |
| NR_047526    | LOC643837 | 0.383462062698773 | 0                  | 2.00E-04 | 1 | 0.0015 | 0        | NA | NA |
| NR_047524    | LOC643837 | 0.383462062698773 | 0                  | 2.00E-04 | 1 | 0.0015 | 0        | NA | NA |
| NR_047523    | LOC643837 | 0.383462062698773 | 0                  | 2.00E-04 | 1 | 0.0015 | 0        | NA | NA |
| NR_047522    | LOC643837 | 0.383462062698773 | 0                  | 2.00E-04 | 1 | 0.0015 | 0        | NA | NA |
| NR_047521    | LOC643837 | 0.383462062698773 | 0                  | 2.00E-04 | 1 | 0.0015 | 0        | NA | NA |
| NR_047520    | LOC643837 | 0.383462062698773 | 0                  | 2.00E-04 | 1 | 0.0015 | 0        | NA | NA |
| NR_047519    | LOC643837 | 0.383462062698773 | 0                  | 2.00E-04 | 1 | 0.0015 | 0        | NA | NA |
| NM_153747    | PIGC      | 0.383462062698773 | 0                  | 2.00E-04 | 1 | 0.0015 | 0        | NA | NA |
| NM_002642    | PIGC      | 0.383462062698773 | 0                  | 2.00E-04 | 1 | 0.0015 | 0        | NA | NA |
| NM_197975    | BTNL3     | 0.383007723761926 | 0                  | 2.00E-04 | 1 | 0.0015 | 0        | NA | NA |
| NM_012374    | OR4D1     | 0.381190368014539 | 0                  | 2.00E-04 | 1 | 0.0015 | 0        | NA | NA |
| NM_001079827 | CLRN2     | 0.381190368014539 | 0                  | 2.00E-04 | 1 | 0.0015 | 0        | NA | NA |
| NM_001146181 | LOC649330 | 0.380736029077692 | 0                  | 2.00E-04 | 1 | 0.0015 | 0        | NA | NA |
| NR_045861    | ARMCX4    | 0.379827351203998 | 0                  | 2.00E-04 | 1 | 0.0015 | 0        | NA | NA |
| NR_045864    | ARMCX4    | 0.379827351203998 | 0                  | 2.00E-04 | 1 | 0.0015 | 0        | NA | NA |
| NR_045862    | ARMCX4    | 0.379827351203998 | 0                  | 2.00E-04 | 1 | 0.0015 | 0        | NA | NA |
| NR_045863    | ARMCX4    | 0.379827351203998 | 0                  | 2.00E-04 | 1 | 0.0015 | 0        | NA | NA |
| NM_001282445 | EHD1      | 0.379827351203998 | 0                  | 2.00E-04 | 1 | 0.0015 | 0        | NA | NA |
| NM_001282444 | EHD1      | 0.379827351203998 | 0                  | 2.00E-04 | 1 | 0.0015 | 0        | NA | NA |
| NM_177405    | CECR1     | 0.379827351203998 | 0                  | 2.00E-04 | 1 | 0.0015 | 0        | NA | NA |
| NM_012264    | TMEM184B  | 0.379373012267151 | 0                  | 4.00E-04 | 1 | 0.0037 | 1.00E-04 | NA | NA |
| NM_001195072 | TMEM184B  | 0.379373012267151 | 0                  | 2.00E-04 | 1 | 0.0015 | 0        | NA | NA |
| NM_001127454 | DFNA5     | 0.379373012267151 | 0                  | 2.00E-04 | 1 | 0.0015 | 0        | NA | NA |
| NM_004403    | DFNA5     | 0.379373012267151 | 0                  | 2.00E-04 | 1 | 0.0015 | 0        | NA | NA |
| NM_147180    | PPP3R2    | 0.466151749204907 | 0.0872330758746025 | 2.00E-04 | 1 | 0.0015 | 0        | NA | NA |
| NM_001004740 | OR5M1     | 0.378918673330304 | 0                  | 2.00E-04 | 1 | 0.0015 | 0        | NA | NA |
| NR_027407    | GOLGA8DP  | 0.378464334393458 | 0                  | 2.00E-04 | 1 | 0.0015 | 0        | NA | NA |

|              |                     |                   |                     |          |        |        |          |    |    |
|--------------|---------------------|-------------------|---------------------|----------|--------|--------|----------|----|----|
| NM_001001995 | <i>GPM6B</i>        | 0.378464334393458 | 0                   | 2.00E-04 | 1      | 0.0015 | 0        | NA | NA |
| NM_005278    | <i>GPM6B</i>        | 0.378464334393458 | 0                   | 2.00E-04 | 1      | 0.0015 | 0        | NA | NA |
| NM_001001996 | <i>GPM6B</i>        | 0.378464334393458 | 0                   | 2.00E-04 | 1      | 0.0015 | 0        | NA | NA |
| NM_001130046 | <i>CCL20</i>        | 0.378009995456611 | 0                   | 2.00E-04 | 1      | 0.0015 | 0        | NA | NA |
| NM_004591    | <i>CCL20</i>        | 0.378009995456611 | 0                   | 2.00E-04 | 1      | 0.0015 | 0        | NA | NA |
| NM_001632    | <i>ALPP</i>         | 0.378009995456611 | 0                   | 2.00E-04 | 1      | 0.0015 | 0        | NA | NA |
| NM_001242617 | <i>NXT2</i>         | 0.378009995456611 | 0                   | 2.00E-04 | 1      | 0.0015 | 0        | NA | NA |
| NM_001002923 | <i>IGFL4</i>        | 0.378009995456611 | 0                   | 2.00E-04 | 1      | 0.0015 | 0        | NA | NA |
| NM_001097622 | <i>OCM</i>          | 0.474329850068151 | 0.0963198546115402  | 2.00E-04 | 1      | 0.0015 | 0        | NA | NA |
| NM_030636    | <i>EEPD1</i>        | 0.377101317582917 | 0                   | 2.00E-04 | 1      | 0.0015 | 0        | NA | NA |
| NM_000727    | <i>CACNG1</i>       | 0.37664697864607  | 0                   | 0.0026   | 0.9974 | 0.021  | 5.00E-04 | NA | NA |
| NR_038979    | <i>LOC100506207</i> | 0.37664697864607  | 0                   | 2.00E-04 | 1      | 0.0015 | 0        | NA | NA |
| NR_038980    | <i>LOC100506207</i> | 0.37664697864607  | 0                   | 2.00E-04 | 1      | 0.0015 | 0        | NA | NA |
| NM_145306    | <i>C10orf35</i>     | 0.376192639709223 | 0                   | 2.00E-04 | 1      | 0.0015 | 0        | NA | NA |
| NM_002286    | <i>LAG3</i>         | 0.376192639709223 | 0                   | 2.00E-04 | 1      | 0.0015 | 0        | NA | NA |
| NM_001164579 | <i>C16orf52</i>     | 0.376192639709223 | 0                   | 2.00E-04 | 1      | 0.0015 | 0        | NA | NA |
| NM_001717    | <i>BNC1</i>         | 0.376192639709223 | 0                   | 2.00E-04 | 1      | 0.0015 | 0        | NA | NA |
| NM_000017    | <i>ACADS</i>        | 0.423443889141299 | 0.0472512494320763  | 2.00E-04 | 1      | 0.0015 | 0        | NA | NA |
| NM_194249    | <i>DND1</i>         | 0.375738300772376 | 0                   | 2.00E-04 | 1      | 0.0015 | 0        | NA | NA |
| NM_001037732 | <i>DEFB128</i>      | 0.375283961835529 | 0                   | 2.00E-04 | 1      | 0.0015 | 0        | NA | NA |
| NM_080838    | <i>WISP1</i>        | 0.374829622898682 | 0                   | 2.00E-04 | 1      | 0.0015 | 0        | NA | NA |
| NR_037944    | <i>WISP1</i>        | 0.374829622898682 | 0                   | 2.00E-04 | 1      | 0.0015 | 0        | NA | NA |
| NM_001204870 | <i>WISP1</i>        | 0.374829622898682 | 0                   | 2.00E-04 | 1      | 0.0015 | 0        | NA | NA |
| NM_003882    | <i>WISP1</i>        | 0.374829622898682 | 0                   | 2.00E-04 | 1      | 0.0015 | 0        | NA | NA |
| NM_001204869 | <i>WISP1</i>        | 0.374829622898682 | 0                   | 2.00E-04 | 1      | 0.0015 | 0        | NA | NA |
| NM_022719    | <i>DGCR14</i>       | 0.374829622898682 | 0                   | 2.00E-04 | 1      | 0.0015 | 0        | NA | NA |
| NM_001145287 | <i>OPRM1</i>        | 0.374375283961836 | 0                   | 2.00E-04 | 0.9998 | 0.0015 | 0        | NA | NA |
| NM_002430    | <i>MN1</i>          | 0.374375283961836 | 0                   | 2.00E-04 | 1      | 0.0015 | 0        | NA | NA |
| NM_021963    | <i>NAP1L2</i>       | 0.374375283961836 | 0                   | 2.00E-04 | 1      | 0.0015 | 0        | NA | NA |
| NR_002912    | <i>SNORA67</i>      | 0.373920945024989 | 0                   | 2.00E-04 | 1      | 0.0015 | 0        | NA | NA |
| NM_005723    | <i>TSPAN5</i>       | 0.373920945024989 | 0                   | 2.00E-04 | 1      | 0.0015 | 0        | NA | NA |
| NM_001256370 | <i>SAMSN1</i>       | 0.500227169468423 | 0.126306224443435   | 2.00E-04 | 1      | 0.0015 | 0        | NA | NA |
| NM_001257964 | <i>BOD1L2</i>       | 0.373466606088142 | 0                   | 2.00E-04 | 1      | 0.0015 | 0        | NA | NA |
| NM_003645    | <i>SLC27A2</i>      | 0.373012267151295 | 0                   | 2.00E-04 | 1      | 0.0015 | 0        | NA | NA |
| NM_001159629 | <i>SLC27A2</i>      | 0.373012267151295 | 0                   | 2.00E-04 | 1      | 0.0015 | 0        | NA | NA |
| NR_024277    | <i>AGPAT4-IT1</i>   | 0.436619718309859 | 0.0636074511585643  | 2.00E-04 | 1      | 0.0015 | 0        | NA | NA |
| NM_080670    | <i>SLC35A4</i>      | 0.378009995456611 | 0.00545206724216265 | 2.00E-04 | 1      | 0.0015 | 0        | NA | NA |
| NM_022131    | <i>CLSTN2</i>       | 0.372557928214448 | 0                   | 2.00E-04 | 1      | 0.0015 | 0        | NA | NA |
| NM_001080460 | <i>LRRIQ4</i>       | 0.372557928214448 | 0                   | 2.00E-04 | 1      | 0.0015 | 0        | NA | NA |
| NM_001002925 | <i>OR5AP2</i>       | 0.371649250340754 | 0                   | 2.00E-04 | 1      | 0.0015 | 0        | NA | NA |
| NM_015431    | <i>TRIM58</i>       | 0.371194911403907 | 0                   | 2.00E-04 | 1      | 0.0015 | 0        | NA | NA |
| NM_001130043 | <i>CRYZ</i>         | 0.371194911403907 | 0                   | 2.00E-04 | 1      | 0.0015 | 0        | NA | NA |
| NM_001130042 | <i>CRYZ</i>         | 0.371194911403907 | 0                   | 2.00E-04 | 1      | 0.0015 | 0        | NA | NA |
| NM_001889    | <i>CRYZ</i>         | 0.371194911403907 | 0                   | 2.00E-04 | 1      | 0.0015 | 0        | NA | NA |
| NM_001134759 | <i>CRYZ</i>         | 0.371194911403907 | 0                   | 2.00E-04 | 1      | 0.0015 | 0        | NA | NA |
| NM_017518    | <i>HAUS7</i>        | 0.371194911403907 | 0                   | 2.00E-04 | 1      | 0.0015 | 0        | NA | NA |
| NM_175068    | <i>KRT73</i>        | 0.435711040436165 | 0.0645161290322581  | 2.00E-04 | 1      | 0.0015 | 0        | NA | NA |

|              |           |                   |                   |          |   |        |   |    |    |
|--------------|-----------|-------------------|-------------------|----------|---|--------|---|----|----|
| NM_018412    | ST7       | 0.37074057246706  | 0                 | 2.00E-04 | 1 | 0.0015 | 0 | NA | NA |
| NM_021908    | ST7       | 0.37074057246706  | 0                 | 2.00E-04 | 1 | 0.0015 | 0 | NA | NA |
| NR_002329    | ST7-OT4   | 0.37074057246706  | 0                 | 2.00E-04 | 1 | 0.0015 | 0 | NA | NA |
| NM_032412    | CYSTM1    | 0.370286233530214 | 0                 | 2.00E-04 | 1 | 0.0015 | 0 | NA | NA |
| NM_020346    | SLC17A6   | 0.369831894593367 | 0                 | 2.00E-04 | 1 | 0.0015 | 0 | NA | NA |
| NM_001006642 | SLC25A25  | 0.369831894593367 | 0                 | 2.00E-04 | 1 | 0.0015 | 0 | NA | NA |
| NM_001265614 | SLC25A25  | 0.369831894593367 | 0                 | 2.00E-04 | 1 | 0.0015 | 0 | NA | NA |
| NM_001004486 | OR13H1    | 0.369831894593367 | 0                 | 2.00E-04 | 1 | 0.0015 | 0 | NA | NA |
| NR_033151    | PLA2G4F   | 0.369831894593367 | 0                 | 2.00E-04 | 1 | 0.0015 | 0 | NA | NA |
| NM_213600    | PLA2G4F   | 0.369831894593367 | 0                 | 2.00E-04 | 1 | 0.0015 | 0 | NA | NA |
| NM_019066    | MAGEL2    | 0.36937755565652  | 0                 | 2.00E-04 | 1 | 0.0015 | 0 | NA | NA |
| NM_130840    | ATP6VOA4  | 0.36937755565652  | 0                 | 2.00E-04 | 1 | 0.0015 | 0 | NA | NA |
| NM_020632    | ATP6VOA4  | 0.36937755565652  | 0                 | 2.00E-04 | 1 | 0.0015 | 0 | NA | NA |
| NM_001039361 | PRAMEF10  | 0.368014538845979 | 0                 | 2.00E-04 | 1 | 0.0015 | 0 | NA | NA |
| NM_152485    | C1orf74   | 0.529304861426624 | 0.161744661517492 | 2.00E-04 | 1 | 0.0015 | 0 | NA | NA |
| NM_019036    | HMGCLL1   | 0.367560199909132 | 0                 | 2.00E-04 | 1 | 0.0015 | 0 | NA | NA |
| NM_001042406 | HMGCLL1   | 0.367560199909132 | 0                 | 2.00E-04 | 1 | 0.0015 | 0 | NA | NA |
| NM_032980    | DTNA      | 0.367105860972285 | 0                 | 2.00E-04 | 1 | 0.0015 | 0 | NA | NA |
| NM_032981    | DTNA      | 0.367105860972285 | 0                 | 2.00E-04 | 1 | 0.0015 | 0 | NA | NA |
| NM_001721    | BMX       | 0.367105860972285 | 0                 | 2.00E-04 | 1 | 0.0015 | 0 | NA | NA |
| NR_026932    | PDCD4-AS1 | 0.367105860972285 | 0                 | 2.00E-04 | 1 | 0.0015 | 0 | NA | NA |
| NM_006284    | TAF10     | 0.367105860972285 | 0                 | 2.00E-04 | 1 | 0.0015 | 0 | NA | NA |
| NM_145341    | PDCD4     | 0.366651522035438 | 0                 | 2.00E-04 | 1 | 0.0015 | 0 | NA | NA |
| NM_001199492 | PDCD4     | 0.366651522035438 | 0                 | 2.00E-04 | 1 | 0.0015 | 0 | NA | NA |
| NM_014456    | PDCD4     | 0.366651522035438 | 0                 | 2.00E-04 | 1 | 0.0015 | 0 | NA | NA |
| NM_001622    | AHSG      | 0.366651522035438 | 0                 | 2.00E-04 | 1 | 0.0015 | 0 | NA | NA |
| NM_012176    | FBXO4     | 0.366651522035438 | 0                 | 2.00E-04 | 1 | 0.0015 | 0 | NA | NA |
| NM_033484    | FBXO4     | 0.366651522035438 | 0                 | 2.00E-04 | 1 | 0.0015 | 0 | NA | NA |
| NM_005926    | MFAP1     | 0.366651522035438 | 0                 | 2.00E-04 | 1 | 0.0015 | 0 | NA | NA |
| NM_005863    | NET1      | 0.366197183098592 | 0                 | 2.00E-04 | 1 | 0.0015 | 0 | NA | NA |
| NR_073040    | NET1      | 0.366197183098592 | 0                 | 2.00E-04 | 1 | 0.0015 | 0 | NA | NA |
| NM_005366    | MAGEA11   | 0.365288505224898 | 0                 | 2.00E-04 | 1 | 0.0015 | 0 | NA | NA |
| NM_004482    | GALNT3    | 0.482507950931395 | 0.117673784643344 | 2.00E-04 | 1 | 0.0015 | 0 | NA | NA |
| NM_002591    | PCK1      | 0.364379827351204 | 0                 | 2.00E-04 | 1 | 0.0015 | 0 | NA | NA |
| NM_018363    | RNLS      | 0.364379827351204 | 0                 | 2.00E-04 | 1 | 0.0015 | 0 | NA | NA |
| NM_001031709 | RNLS      | 0.364379827351204 | 0                 | 2.00E-04 | 1 | 0.0015 | 0 | NA | NA |
| NM_019104    | LIN37     | 0.363925488414357 | 0                 | 2.00E-04 | 1 | 0.0015 | 0 | NA | NA |
| NM_005441    | CHAF1B    | 0.363925488414357 | 0                 | 2.00E-04 | 1 | 0.0015 | 0 | NA | NA |
| NM_001004135 | OR2A12    | 0.363925488414357 | 0                 | 2.00E-04 | 1 | 0.0015 | 0 | NA | NA |
| NM_006379    | SEMA3C    | 0.363925488414357 | 0                 | 2.00E-04 | 1 | 0.0015 | 0 | NA | NA |
| NM_181840    | KCNK18    | 0.36347114947751  | 0                 | 2.00E-04 | 1 | 0.0015 | 0 | NA | NA |
| NM_004363    | CEACAM5   | 0.36347114947751  | 0                 | 2.00E-04 | 1 | 0.0015 | 0 | NA | NA |
| NM_138342    | GLB1L2    | 0.362562471603816 | 0                 | 2.00E-04 | 1 | 0.0015 | 0 | NA | NA |
| NR_037699    | SAFB      | 0.362562471603816 | 0                 | 2.00E-04 | 1 | 0.0015 | 0 | NA | NA |
| NM_002967    | SAFB      | 0.362562471603816 | 0                 | 2.00E-04 | 1 | 0.0015 | 0 | NA | NA |
| NM_001201340 | SAFB      | 0.362562471603816 | 0                 | 2.00E-04 | 1 | 0.0015 | 0 | NA | NA |
| NM_001201338 | SAFB      | 0.362562471603816 | 0                 | 2.00E-04 | 1 | 0.0015 | 0 | NA | NA |

|              |            |                   |                   |          |        |        |          |    |    |
|--------------|------------|-------------------|-------------------|----------|--------|--------|----------|----|----|
| NM_001201339 | SAFB       | 0.362562471603816 | 0                 | 2.00E-04 | 1      | 0.0015 | 0        | NA | NA |
| NM_018293    | ZNF654     | 0.362562471603816 | 0                 | 2.00E-04 | 1      | 0.0015 | 0        | NA | NA |
| NM_018361    | AGPAT5     | 0.36210813266697  | 0                 | 2.00E-04 | 1      | 0.0015 | 0        | NA | NA |
| NM_002371    | MAL        | 0.361653793730123 | 0                 | 2.00E-04 | 1      | 0.0015 | 0        | NA | NA |
| NM_022440    | MAL        | 0.361653793730123 | 0                 | 2.00E-04 | 1      | 0.0015 | 0        | NA | NA |
| NM_022439    | MAL        | 0.361653793730123 | 0                 | 2.00E-04 | 1      | 0.0015 | 0        | NA | NA |
| NM_022438    | MAL        | 0.361653793730123 | 0                 | 2.00E-04 | 1      | 0.0015 | 0        | NA | NA |
| NM_181610    | KRTAP19-4  | 0.361653793730123 | 0                 | 2.00E-04 | 1      | 0.0015 | 0        | NA | NA |
| NM_182910    | SYNE2      | 0.361199454793276 | 0                 | 2.00E-04 | 1      | 0.0015 | 0        | NA | NA |
| NR_027252    | CYP1B1-AS1 | 0.393457519309405 | 0.032258064516129 | 2.00E-04 | 1      | 0.0015 | 0        | NA | NA |
| NM_018557    | LRP1B      | 0.360745115856429 | 0                 | 2.00E-04 | 1      | 0.0015 | 0        | NA | NA |
| NR_003015    | SNORA53    | 0.360290776919582 | 0                 | 2.00E-04 | 1      | 0.0015 | 0        | NA | NA |
| NM_001193636 | DHRS4L2    | 0.360290776919582 | 0                 | 2.00E-04 | 1      | 0.0015 | 0        | NA | NA |
| NM_001193637 | DHRS4L2    | 0.360290776919582 | 0                 | 2.00E-04 | 1      | 0.0015 | 0        | NA | NA |
| NM_001193635 | DHRS4L2    | 0.360290776919582 | 0                 | 2.00E-04 | 1      | 0.0015 | 0        | NA | NA |
| NM_013936    | OR12D2     | 0.360290776919582 | 0                 | 2.00E-04 | 1      | 0.0015 | 0        | NA | NA |
| NM_001195195 | TP53AIP1   | 0.358927760109041 | 0                 | 2.00E-04 | 1      | 0.0015 | 0        | NA | NA |
| NM_001251964 | TP53AIP1   | 0.358927760109041 | 0                 | 2.00E-04 | 1      | 0.0015 | 0        | NA | NA |
| NM_022112    | TP53AIP1   | 0.358927760109041 | 0                 | 2.00E-04 | 1      | 0.0015 | 0        | NA | NA |
| NM_002487    | NDN        | 0.358927760109041 | 0                 | 2.00E-04 | 1      | 0.0015 | 0        | NA | NA |
| NM_001098844 | TMEM236    | 0.358473421172194 | 0                 | 2.00E-04 | 1      | 0.0015 | 0        | NA | NA |
| NM_207341    | ZP1        | 0.358473421172194 | 0                 | 2.00E-04 | 1      | 0.0015 | 0        | NA | NA |
| NM_001244713 | RAD23B     | 0.358473421172194 | 0                 | 2.00E-04 | 1      | 0.0015 | 0        | NA | NA |
| NM_014759    | PHYHIP     | 0.358473421172194 | 0                 | 2.00E-04 | 1      | 0.0015 | 0        | NA | NA |
| NM_001099335 | PHYHIP     | 0.358473421172194 | 0                 | 2.00E-04 | 1      | 0.0015 | 0        | NA | NA |
| NM_001166055 | EDNRA      | 0.358019082235348 | 0                 | 2.00E-04 | 1      | 0.0015 | 0        | NA | NA |
| NM_001957    | EDNRA      | 0.358019082235348 | 0                 | 2.00E-04 | 1      | 0.0015 | 0        | NA | NA |
| NM_001256283 | EDNRA      | 0.358019082235348 | 0                 | 2.00E-04 | 1      | 0.0015 | 0        | NA | NA |
| NR_045958    | EDNRA      | 0.358019082235348 | 0                 | 2.00E-04 | 1      | 0.0015 | 0        | NA | NA |
| NR_028508    | PART1      | 0.358019082235348 | 0                 | 2.00E-04 | 0.9998 | 0.0015 | 0        | NA | NA |
| NR_028509    | PART1      | 0.358019082235348 | 0                 | 6.00E-04 | 1      | 0.005  | 1.00E-04 | NA | NA |
| NM_206933    | USH2A      | 0.358019082235348 | 0                 | 2.00E-04 | 1      | 0.0015 | 0        | NA | NA |
| NM_007123    | USH2A      | 0.358019082235348 | 0                 | 2.00E-04 | 1      | 0.0015 | 0        | NA | NA |
| NM_001256615 | LOC149373  | 0.357564743298501 | 0                 | 2.00E-04 | 1      | 0.0015 | 0        | NA | NA |
| NM_004138    | KRT33A     | 0.357564743298501 | 0                 | 2.00E-04 | 1      | 0.0015 | 0        | NA | NA |
| NM_001256312 | STK3       | 0.357110404361654 | 0                 | 2.00E-04 | 1      | 0.0015 | 0        | NA | NA |
| NR_023311    | ZNF137P    | 0.356656065424807 | 0                 | 2.00E-04 | 1      | 0.0015 | 0        | NA | NA |
| NR_026821    | FAM138B    | 0.356656065424807 | 0                 | 2.00E-04 | 1      | 0.0015 | 0        | NA | NA |
| NM_001783    | CD79A      | 0.35620172648796  | 0                 | 2.00E-04 | 1      | 0.0015 | 0        | NA | NA |
| NM_021601    | CD79A      | 0.35620172648796  | 0                 | 2.00E-04 | 1      | 0.0015 | 0        | NA | NA |
| NM_053001    | OSR2       | 0.35620172648796  | 0                 | 2.00E-04 | 1      | 0.0015 | 0        | NA | NA |
| NM_001142462 | OSR2       | 0.35620172648796  | 0                 | 2.00E-04 | 1      | 0.0015 | 0        | NA | NA |
| NM_001007139 | IGF2       | 0.35620172648796  | 0                 | 2.00E-04 | 1      | 0.0015 | 0        | NA | NA |
| NR_003246    | GOLGA6L5   | 0.35620172648796  | 0                 | 2.00E-04 | 1      | 0.0015 | 0        | NA | NA |
| NM_001004695 | OR2T33     | 0.355747387551113 | 0                 | 2.00E-04 | 1      | 0.0015 | 0        | NA | NA |
| NM_001142316 | LMO2       | 0.355747387551113 | 0                 | 2.00E-04 | 1      | 0.0015 | 0        | NA | NA |
| NM_001142315 | LMO2       | 0.355747387551113 | 0                 | 2.00E-04 | 1      | 0.0015 | 0        | NA | NA |

|              |             |                   |                    |          |        |        |        |    |    |
|--------------|-------------|-------------------|--------------------|----------|--------|--------|--------|----|----|
| NR_002714    | REG1P       | 0.355747387551113 | 0                  | 2.00E-04 | 1      | 0.0015 | 0      | NA | NA |
| NM_004564    | PET112      | 0.355747387551113 | 0                  | 2.00E-04 | 1      | 0.0015 | 0      | NA | NA |
| NM_020245    | TULP4       | 0.355293048614266 | 0                  | 2.00E-04 | 1      | 0.0015 | 0      | NA | NA |
| NM_001007466 | TULP4       | 0.355293048614266 | 0                  | 2.00E-04 | 1      | 0.0015 | 0      | NA | NA |
| NR_034145    | LINC00670   | 0.354838709677419 | 0                  | 2.00E-04 | 1      | 0.0015 | 0      | NA | NA |
| NR_034144    | LINC00670   | 0.354838709677419 | 0                  | 2.00E-04 | 1      | 0.0015 | 0      | NA | NA |
| NM_001025252 | TPD52       | 0.354384370740572 | 0                  | 2.00E-04 | 1      | 0.0015 | 0      | NA | NA |
| NM_001005466 | OR10G2      | 0.353930031803726 | 0                  | 2.00E-04 | 1      | 0.0015 | 0      | NA | NA |
| NR_003582    | ATP8B5P     | 0.353475692866879 | 0                  | 2.00E-04 | 1      | 0.0015 | 0      | NA | NA |
| NR_003581    | ATP8B5P     | 0.353475692866879 | 0                  | 2.00E-04 | 1      | 0.0015 | 0      | NA | NA |
| NM_019060    | CRCT1       | 0.353021353930032 | 0                  | 2.00E-04 | 1      | 0.0015 | 0      | NA | NA |
| NR_045125    | HIST1H2APS1 | 0.353021353930032 | 0                  | 2.00E-04 | 1      | 0.0015 | 0      | NA | NA |
| NM_014985    | CEP152      | 0.353021353930032 | 0                  | 2.00E-04 | 1      | 0.0015 | 0      | NA | NA |
| NM_001194998 | CEP152      | 0.353021353930032 | 0                  | 2.00E-04 | 1      | 0.0015 | 0      | NA | NA |
| NM_203458    | NOTCH2NL    | 0.403907314856883 | 0.0508859609268514 | 2.00E-04 | 1      | 0.0015 | 0      | NA | NA |
| NM_001167670 | TMEM239     | 0.352567014993185 | 0                  | 2.00E-04 | 1      | 0.0015 | 0      | NA | NA |
| NM_001001325 | SPINK14     | 0.352567014993185 | 0                  | 2.00E-04 | 1      | 0.0015 | 0      | NA | NA |
| NM_006786    | UTS2        | 0.352567014993185 | 0                  | 2.00E-04 | 1      | 0.0015 | 0      | NA | NA |
| NM_207385    | C16orf47    | 0.352112676056338 | 0                  | 2.00E-04 | 1      | 0.0015 | 0      | NA | NA |
| NM_001005170 | OR52I2      | 0.351658337119491 | 0                  | 2.00E-04 | 1      | 0.0015 | 0      | NA | NA |
| NM_002811    | PSMD7       | 0.351203998182644 | 0                  | 2.00E-04 | 1      | 0.0015 | 0      | NA | NA |
| NM_001198664 | GNG10       | 0.351203998182644 | 0                  | 2.00E-04 | 1      | 0.0015 | 0      | NA | NA |
| NM_001017998 | GNG10       | 0.351203998182644 | 0                  | 2.00E-04 | 1      | 0.0015 | 0      | NA | NA |
| NM_001143831 | GRM5        | 0.350749659245797 | 0                  | 2.00E-04 | 1      | 0.0015 | 0      | NA | NA |
| NM_021191    | NEUROD4     | 0.35029532030895  | 0                  | 2.00E-04 | 1      | 0.0015 | 0      | NA | NA |
| NM_001014977 | BANF2       | 0.35029532030895  | 0                  | 2.00E-04 | 1      | 0.0015 | 0      | NA | NA |
| NM_178477    | BANF2       | 0.35029532030895  | 0                  | 2.00E-04 | 1      | 0.0015 | 0      | NA | NA |
| NM_024105    | ALG12       | 0.35029532030895  | 0                  | 2.00E-04 | 1      | 0.0015 | 0      | NA | NA |
| NM_002825    | PTN         | 0.349840981372104 | 0                  | 2.00E-04 | 1      | 0.0015 | 0      | NA | NA |
| NM_001172702 | SLC38A6     | 0.349386642435257 | 0                  | 2.00E-04 | 1      | 0.0015 | 0      | NA | NA |
| NM_153811    | SLC38A6     | 0.349386642435257 | 0                  | 2.00E-04 | 1      | 0.0015 | 0      | NA | NA |
| NR_033344    | SLC38A6     | 0.349386642435257 | 0                  | 2.00E-04 | 1      | 0.0015 | 0      | NA | NA |
| NM_001040448 | DEFB131     | 0.349386642435257 | 0                  | 2.00E-04 | 1      | 0.0015 | 0      | NA | NA |
| NM_002241    | KCNJ10      | 0.349386642435257 | 0                  | 2.00E-04 | 1      | 0.0015 | 0      | NA | NA |
| NM_022436    | ABCG5       | 0.349386642435257 | 0                  | 2.00E-04 | 1      | 0.0015 | 0      | NA | NA |
| NM_006837    | COPS5       | 0.349386642435257 | 0                  | 2.00E-04 | 1      | 0.0015 | 0      | NA | NA |
| NM_001145774 | GPR56       | 0.34893230349841  | 0                  | 2.00E-04 | 1      | 0.0015 | 0      | NA | NA |
| NM_024790    | CSPP1       | 0.34893230349841  | 0                  | 2.00E-04 | 1      | 0.0015 | 0      | NA | NA |
| NM_001252195 | C9orf24     | 0.34893230349841  | 0                  | 0.0108   | 0.992  | 0.0657 | 0.002  | NA | NA |
| NM_147169    | C9orf24     | 0.34893230349841  | 0                  | 0.0118   | 0.988  | 0.0657 | 0.0022 | NA | NA |
| NM_147168    | C9orf24     | 0.34893230349841  | 0                  | 0.0126   | 0.9902 | 0.0657 | 0.0024 | NA | NA |
| NM_015315    | LARP1       | 0.348477964561563 | 0                  | 2.00E-04 | 1      | 0.0015 | 0      | NA | NA |
| NM_002177    | IFNW1       | 0.348477964561563 | 0                  | 2.00E-04 | 1      | 0.0015 | 0      | NA | NA |
| NR_023390    | LINC00476   | 0.348477964561563 | 0                  | 2.00E-04 | 1      | 0.0015 | 0      | NA | NA |
| NR_023389    | LINC00476   | 0.348477964561563 | 0                  | 2.00E-04 | 1      | 0.0015 | 0      | NA | NA |
| NM_020141    | TMEM167B    | 0.347569286687869 | 0                  | 2.00E-04 | 1      | 0.0015 | 0      | NA | NA |
| NR_029374    | LEF1-AS1    | 0.347569286687869 | 0                  | 2.00E-04 | 1      | 0.0015 | 0      | NA | NA |

|              |         |                   |                    |          |   |        |   |    |    |
|--------------|---------|-------------------|--------------------|----------|---|--------|---|----|----|
| NR_002447    | SNORD24 | 0.347569286687869 | 0                  | 2.00E-04 | 1 | 0.0015 | 0 | NA | NA |
| NM_032404    | TMPRSS3 | 0.347569286687869 | 0                  | 2.00E-04 | 1 | 0.0015 | 0 | NA | NA |
| NM_004374    | COX6C   | 0.347569286687869 | 0                  | 2.00E-04 | 1 | 0.0015 | 0 | NA | NA |
| NM_022150    | NPVF    | 0.371194911403907 | 0.0236256247160382 | 2.00E-04 | 1 | 0.0015 | 0 | NA | NA |
| NM_001122838 | NAPEPLD | 0.346660608814175 | 0                  | 2.00E-04 | 1 | 0.0015 | 0 | NA | NA |
| NM_198990    | NAPEPLD | 0.346660608814175 | 0                  | 2.00E-04 | 1 | 0.0015 | 0 | NA | NA |
| NM_002578    | PAK3    | 0.346206269877328 | 0                  | 2.00E-04 | 1 | 0.0015 | 0 | NA | NA |
| NM_001005213 | OR9G1   | 0.345751930940482 | 0                  | 2.00E-04 | 1 | 0.0015 | 0 | NA | NA |
| NM_001013358 | OR9G9   | 0.345751930940482 | 0                  | 2.00E-04 | 1 | 0.0015 | 0 | NA | NA |
| NM_006018    | HCAR3   | 0.345751930940482 | 0                  | 2.00E-04 | 1 | 0.0015 | 0 | NA | NA |
| NM_001496    | GFRA3   | 0.345751930940482 | 0                  | 2.00E-04 | 1 | 0.0015 | 0 | NA | NA |
| NM_001197223 | PDE4D   | 0.456610631531122 | 0.111767378464334  | 2.00E-04 | 1 | 0.0015 | 0 | NA | NA |
| NM_001166159 | NDUFS2  | 0.344843253066788 | 0                  | 2.00E-04 | 1 | 0.0015 | 0 | NA | NA |
| NM_031923    | TAF3    | 0.344843253066788 | 0                  | 2.00E-04 | 1 | 0.0015 | 0 | NA | NA |
| NM_130390    | TRIM34  | 0.344843253066788 | 0                  | 2.00E-04 | 1 | 0.0015 | 0 | NA | NA |
| NM_002427    | MMP13   | 0.344843253066788 | 0                  | 2.00E-04 | 1 | 0.0015 | 0 | NA | NA |
| NM_012352    | OR1A2   | 0.344388914129941 | 0                  | 2.00E-04 | 1 | 0.0015 | 0 | NA | NA |
| NM_144988    | ALG14   | 0.344388914129941 | 0                  | 2.00E-04 | 1 | 0.0015 | 0 | NA | NA |
| NM_032583    | ABCC11  | 0.344388914129941 | 0                  | 2.00E-04 | 1 | 0.0015 | 0 | NA | NA |
| NM_145186    | ABCC11  | 0.344388914129941 | 0                  | 2.00E-04 | 1 | 0.0015 | 0 | NA | NA |
| NM_001127453 | DFNA5   | 0.344388914129941 | 0                  | 2.00E-04 | 1 | 0.0015 | 0 | NA | NA |
| NM_031457    | MS4A8   | 0.343480236256247 | 0                  | 2.00E-04 | 1 | 0.0015 | 0 | NA | NA |
| NM_001278426 | LILRB4  | 0.343480236256247 | 0                  | 2.00E-04 | 1 | 0.0015 | 0 | NA | NA |
| NM_001278427 | LILRB4  | 0.343480236256247 | 0                  | 2.00E-04 | 1 | 0.0015 | 0 | NA | NA |
| NM_001278429 | LILRB4  | 0.343480236256247 | 0                  | 2.00E-04 | 1 | 0.0015 | 0 | NA | NA |
| NM_001278430 | LILRB4  | 0.343480236256247 | 0                  | 2.00E-04 | 1 | 0.0015 | 0 | NA | NA |
| NM_001278428 | LILRB4  | 0.343480236256247 | 0                  | 2.00E-04 | 1 | 0.0015 | 0 | NA | NA |
| NM_031302    | GLT8D2  | 0.343480236256247 | 0                  | 2.00E-04 | 1 | 0.0015 | 0 | NA | NA |
| NM_001040425 | U2AF1L4 | 0.3430258973194   | 0                  | 2.00E-04 | 1 | 0.0015 | 0 | NA | NA |
| NM_144987    | U2AF1L4 | 0.3430258973194   | 0                  | 2.00E-04 | 1 | 0.0015 | 0 | NA | NA |
| NM_001198944 | DTNA    | 0.342117219445706 | 0                  | 2.00E-04 | 1 | 0.0015 | 0 | NA | NA |
| NM_001198942 | DTNA    | 0.342117219445706 | 0                  | 2.00E-04 | 1 | 0.0015 | 0 | NA | NA |
| NM_021636    | LGR6    | 0.341208541572013 | 0                  | 2.00E-04 | 1 | 0.0015 | 0 | NA | NA |
| NM_033198    | PIGS    | 0.341208541572013 | 0                  | 2.00E-04 | 1 | 0.0015 | 0 | NA | NA |
| NM_001256733 | SSBP2   | 0.341208541572013 | 0                  | 2.00E-04 | 1 | 0.0015 | 0 | NA | NA |
| NM_001256736 | SSBP2   | 0.341208541572013 | 0                  | 2.00E-04 | 1 | 0.0015 | 0 | NA | NA |
| NM_001256735 | SSBP2   | 0.341208541572013 | 0                  | 2.00E-04 | 1 | 0.0015 | 0 | NA | NA |
| NM_001256734 | SSBP2   | 0.341208541572013 | 0                  | 2.00E-04 | 1 | 0.0015 | 0 | NA | NA |
| NM_001256732 | SSBP2   | 0.341208541572013 | 0                  | 2.00E-04 | 1 | 0.0015 | 0 | NA | NA |
| NM_012446    | SSBP2   | 0.341208541572013 | 0                  | 2.00E-04 | 1 | 0.0015 | 0 | NA | NA |
| NM_017544    | NKRF    | 0.341208541572013 | 0                  | 2.00E-04 | 1 | 0.0015 | 0 | NA | NA |
| NM_001173487 | NKRF    | 0.341208541572013 | 0                  | 2.00E-04 | 1 | 0.0015 | 0 | NA | NA |
| NM_015542    | UPF2    | 0.340754202635166 | 0                  | 2.00E-04 | 1 | 0.0015 | 0 | NA | NA |
| NM_080599    | UPF2    | 0.340754202635166 | 0                  | 2.00E-04 | 1 | 0.0015 | 0 | NA | NA |
| NM_006687    | ACTL7A  | 0.47887323943662  | 0.138573375738301  | 2.00E-04 | 1 | 0.0015 | 0 | NA | NA |
| NM_006078    | CACNG2  | 0.339845524761472 | 0                  | 2.00E-04 | 1 | 0.0015 | 0 | NA | NA |
| NM_014751    | MTSS1   | 0.339845524761472 | 0                  | 2.00E-04 | 1 | 0.0015 | 0 | NA | NA |

|              |           |                   |                    |          |        |        |          |    |    |
|--------------|-----------|-------------------|--------------------|----------|--------|--------|----------|----|----|
| NM_001282971 | MTSS1     | 0.339845524761472 | 0                  | 2.00E-04 | 1      | 0.0015 | 0        | NA | NA |
| NM_001282974 | MTSS1     | 0.339845524761472 | 0                  | 2.00E-04 | 1      | 0.0015 | 0        | NA | NA |
| NM_183001    | SHC1      | 0.339391185824625 | 0                  | 2.00E-04 | 1      | 0.0015 | 0        | NA | NA |
| NM_001130040 | SHC1      | 0.339391185824625 | 0                  | 2.00E-04 | 1      | 0.0015 | 0        | NA | NA |
| NM_005019    | PDE1A     | 0.339391185824625 | 0                  | 2.00E-04 | 1      | 0.0015 | 0        | NA | NA |
| NM_001142478 | NREP      | 0.339391185824625 | 0                  | 2.00E-04 | 1      | 0.0015 | 0        | NA | NA |
| NM_025260    | C6orf25   | 0.408905043162199 | 0.0699681962744207 | 2.00E-04 | 1      | 0.0015 | 0        | NA | NA |
| NM_138275    | C6orf25   | 0.408905043162199 | 0.0699681962744207 | 2.00E-04 | 1      | 0.0015 | 0        | NA | NA |
| NM_138274    | C6orf25   | 0.408905043162199 | 0.0699681962744207 | 2.00E-04 | 1      | 0.0015 | 0        | NA | NA |
| NM_138277    | C6orf25   | 0.408905043162199 | 0.0699681962744207 | 2.00E-04 | 1      | 0.0015 | 0        | NA | NA |
| NM_138273    | C6orf25   | 0.408905043162199 | 0.0699681962744207 | 2.00E-04 | 1      | 0.0015 | 0        | NA | NA |
| NM_138272    | C6orf25   | 0.408905043162199 | 0.0699681962744207 | 2.00E-04 | 1      | 0.0015 | 0        | NA | NA |
| NM_001146344 | PRAMEF11  | 0.338936846887778 | 0                  | 2.00E-04 | 1      | 0.0015 | 0        | NA | NA |
| NM_003895    | SYNJ1     | 0.338936846887778 | 0                  | 2.00E-04 | 1      | 0.0015 | 0        | NA | NA |
| NM_203446    | SYNJ1     | 0.338936846887778 | 0                  | 2.00E-04 | 1      | 0.0015 | 0        | NA | NA |
| NM_000507    | FBP1      | 0.338936846887778 | 0                  | 2.00E-04 | 1      | 0.0015 | 0        | NA | NA |
| NM_001127628 | FBP1      | 0.338936846887778 | 0                  | 2.00E-04 | 1      | 0.0015 | 0        | NA | NA |
| NM_019892    | INPP5E    | 0.338936846887778 | 0                  | 2.00E-04 | 1      | 0.0015 | 0        | NA | NA |
| NM_006256    | PKN2      | 0.338482507950931 | 0                  | 2.00E-04 | 1      | 0.0015 | 0        | NA | NA |
| NM_007245    | ATXN2L    | 0.338482507950931 | 0                  | 2.00E-04 | 1      | 0.0015 | 0        | NA | NA |
| NM_148415    | ATXN2L    | 0.338482507950931 | 0                  | 2.00E-04 | 1      | 0.0015 | 0        | NA | NA |
| NM_148416    | ATXN2L    | 0.338482507950931 | 0                  | 2.00E-04 | 1      | 0.0015 | 0        | NA | NA |
| NM_145714    | ATXN2L    | 0.338482507950931 | 0                  | 2.00E-04 | 1      | 0.0015 | 0        | NA | NA |
| NM_017492    | ATXN2L    | 0.338482507950931 | 0                  | 2.00E-04 | 1      | 0.0015 | 0        | NA | NA |
| NM_148414    | ATXN2L    | 0.338482507950931 | 0                  | 2.00E-04 | 1      | 0.0015 | 0        | NA | NA |
| NM_001170780 | FAM122C   | 0.338482507950931 | 0                  | 2.00E-04 | 1      | 0.0015 | 0        | NA | NA |
| NM_002935    | RNASE3    | 0.338028169014085 | 0                  | 2.00E-04 | 1      | 0.0015 | 0        | NA | NA |
| NM_001122819 | KIF17     | 0.338028169014085 | 0                  | 2.00E-04 | 1      | 0.0015 | 0        | NA | NA |
| NM_020816    | KIF17     | 0.338028169014085 | 0                  | 2.00E-04 | 1      | 0.0015 | 0        | NA | NA |
| NM_005323    | HIST1H1T  | 0.338028169014085 | 0                  | 2.00E-04 | 1      | 0.0015 | 0        | NA | NA |
| NM_001029883 | C2orf71   | 0.337573830077238 | 0                  | 4.00E-04 | 0.9994 | 0.0037 | 1.00E-04 | NA | NA |
| NM_001124756 | PABPC1L   | 0.337119491140391 | 0                  | 2.00E-04 | 1      | 0.0015 | 0        | NA | NA |
| NM_021999    | ITM2B     | 0.336665152203544 | 0                  | 2.00E-04 | 1      | 0.0015 | 0        | NA | NA |
| NM_014329    | EDC4      | 0.336665152203544 | 0                  | 2.00E-04 | 1      | 0.0015 | 0        | NA | NA |
| NM_001276436 | KCNJ15    | 0.336665152203544 | 0                  | 2.00E-04 | 1      | 0.0015 | 0        | NA | NA |
| NM_001276435 | KCNJ15    | 0.336665152203544 | 0                  | 2.00E-04 | 1      | 0.0015 | 0        | NA | NA |
| NM_002243    | KCNJ15    | 0.336665152203544 | 0                  | 2.00E-04 | 1      | 0.0015 | 0        | NA | NA |
| NM_007184    | NISCH     | 0.336665152203544 | 0                  | 2.00E-04 | 1      | 0.0015 | 0        | NA | NA |
| NM_001276294 | NISCH     | 0.336665152203544 | 0                  | 2.00E-04 | 1      | 0.0015 | 0        | NA | NA |
| NM_001276293 | NISCH     | 0.336665152203544 | 0                  | 2.00E-04 | 1      | 0.0015 | 0        | NA | NA |
| NM_024873    | TNIP3     | 0.336665152203544 | 0                  | 2.00E-04 | 1      | 0.0015 | 0        | NA | NA |
| NM_021072    | HCN1      | 0.336665152203544 | 0                  | 2.00E-04 | 1      | 0.0015 | 0        | NA | NA |
| NM_001134476 | LRRC8B    | 0.336210813266697 | 0                  | 2.00E-04 | 1      | 0.0015 | 0        | NA | NA |
| NM_001042432 | CLN3      | 0.33575647432985  | 0                  | 2.00E-04 | 1      | 0.0015 | 0        | NA | NA |
| NM_000086    | CLN3      | 0.33575647432985  | 0                  | 2.00E-04 | 1      | 0.0015 | 0        | NA | NA |
| NR_026987    | LOC339524 | 0.335302135393003 | 0                  | 2.00E-04 | 1      | 0.0015 | 0        | NA | NA |
| NR_026986    | LOC339524 | 0.335302135393003 | 0                  | 2.00E-04 | 1      | 0.0015 | 0        | NA | NA |

|              |              |                   |   |          |   |        |   |    |    |
|--------------|--------------|-------------------|---|----------|---|--------|---|----|----|
| NR_026985    | LOC339524    | 0.335302135393003 | 0 | 2.00E-04 | 1 | 0.0015 | 0 | NA | NA |
| NM_001460    | FMO2         | 0.335302135393003 | 0 | 2.00E-04 | 1 | 0.0015 | 0 | NA | NA |
| NM_000465    | BARD1        | 0.335302135393003 | 0 | 2.00E-04 | 1 | 0.0015 | 0 | NA | NA |
| NM_001282543 | BARD1        | 0.335302135393003 | 0 | 2.00E-04 | 1 | 0.0015 | 0 | NA | NA |
| NM_001282545 | BARD1        | 0.335302135393003 | 0 | 2.00E-04 | 1 | 0.0015 | 0 | NA | NA |
| NM_001282548 | BARD1        | 0.335302135393003 | 0 | 2.00E-04 | 1 | 0.0015 | 0 | NA | NA |
| NM_001282549 | BARD1        | 0.335302135393003 | 0 | 2.00E-04 | 1 | 0.0015 | 0 | NA | NA |
| NR_104212    | BARD1        | 0.335302135393003 | 0 | 2.00E-04 | 1 | 0.0015 | 0 | NA | NA |
| NR_104215    | BARD1        | 0.335302135393003 | 0 | 2.00E-04 | 1 | 0.0015 | 0 | NA | NA |
| NR_104216    | BARD1        | 0.335302135393003 | 0 | 2.00E-04 | 1 | 0.0015 | 0 | NA | NA |
| NM_033646    | CDH7         | 0.334847796456156 | 0 | 2.00E-04 | 1 | 0.0015 | 0 | NA | NA |
| NM_001199938 | EBLN1        | 0.334847796456156 | 0 | 2.00E-04 | 1 | 0.0015 | 0 | NA | NA |
| NM_001166688 | PFKM         | 0.334393457519309 | 0 | 2.00E-04 | 1 | 0.0015 | 0 | NA | NA |
| NM_001166687 | PFKM         | 0.334393457519309 | 0 | 2.00E-04 | 1 | 0.0015 | 0 | NA | NA |
| NM_001204478 | TVP23C-CDRT4 | 0.334393457519309 | 0 | 2.00E-04 | 1 | 0.0015 | 0 | NA | NA |
| NR_037924    | TVP23C-CDRT4 | 0.334393457519309 | 0 | 2.00E-04 | 1 | 0.0015 | 0 | NA | NA |
| NM_001135036 | TVP23C       | 0.334393457519309 | 0 | 2.00E-04 | 1 | 0.0015 | 0 | NA | NA |
| NM_145301    | TVP23C       | 0.334393457519309 | 0 | 2.00E-04 | 1 | 0.0015 | 0 | NA | NA |
| NR_073393    | SSX9         | 0.334393457519309 | 0 | 2.00E-04 | 1 | 0.0015 | 0 | NA | NA |
| NM_144614    | MBD3L2       | 0.333939118582463 | 0 | 2.00E-04 | 1 | 0.0015 | 0 | NA | NA |
| NM_001040662 | METTL21D     | 0.333939118582463 | 0 | 2.00E-04 | 1 | 0.0015 | 0 | NA | NA |
| NM_024558    | METTL21D     | 0.333939118582463 | 0 | 2.00E-04 | 1 | 0.0015 | 0 | NA | NA |
| NR_049739    | METTL21D     | 0.333939118582463 | 0 | 2.00E-04 | 1 | 0.0015 | 0 | NA | NA |
| NR_049738    | METTL21D     | 0.333939118582463 | 0 | 2.00E-04 | 1 | 0.0015 | 0 | NA | NA |
| NR_030697    | TRAPPC1      | 0.333939118582463 | 0 | 2.00E-04 | 1 | 0.0015 | 0 | NA | NA |
| NM_001166621 | TRAPPC1      | 0.333939118582463 | 0 | 2.00E-04 | 1 | 0.0015 | 0 | NA | NA |
| NM_001743    | CALM2        | 0.333484779645616 | 0 | 2.00E-04 | 1 | 0.0015 | 0 | NA | NA |
| NM_005664    | MKRN3        | 0.332576101771922 | 0 | 2.00E-04 | 1 | 0.0015 | 0 | NA | NA |
| NM_147193    | GLIS1        | 0.332576101771922 | 0 | 2.00E-04 | 1 | 0.0015 | 0 | NA | NA |
| NM_019053    | EXOC6        | 0.332121762835075 | 0 | 2.00E-04 | 1 | 0.0015 | 0 | NA | NA |
| NM_170736    | KCNJ15       | 0.332121762835075 | 0 | 2.00E-04 | 1 | 0.0015 | 0 | NA | NA |
| NM_198691    | KRTAP10-1    | 0.332121762835075 | 0 | 2.00E-04 | 1 | 0.0015 | 0 | NA | NA |
| NM_000936    | PNLIP        | 0.331213084961381 | 0 | 2.00E-04 | 1 | 0.0015 | 0 | NA | NA |
| NM_001004757 | OR51Q1       | 0.331213084961381 | 0 | 2.00E-04 | 1 | 0.0015 | 0 | NA | NA |
| NM_005313    | PDIA3        | 0.331213084961381 | 0 | 2.00E-04 | 1 | 0.0015 | 0 | NA | NA |
| NM_001282645 | PRKCCQ       | 0.331213084961381 | 0 | 2.00E-04 | 1 | 0.0015 | 0 | NA | NA |
| NM_006257    | PRKCCQ       | 0.331213084961381 | 0 | 2.00E-04 | 1 | 0.0015 | 0 | NA | NA |
| NM_001282644 | PRKCCQ       | 0.331213084961381 | 0 | 2.00E-04 | 1 | 0.0015 | 0 | NA | NA |
| NM_001242413 | PRKCCQ       | 0.331213084961381 | 0 | 2.00E-04 | 1 | 0.0015 | 0 | NA | NA |
| NM_001257195 | KLHL3        | 0.331213084961381 | 0 | 2.00E-04 | 1 | 0.0015 | 0 | NA | NA |
| NM_001282949 | COPS7B       | 0.330758746024534 | 0 | 2.00E-04 | 1 | 0.0015 | 0 | NA | NA |
| NM_001282951 | COPS7B       | 0.330758746024534 | 0 | 2.00E-04 | 1 | 0.0015 | 0 | NA | NA |
| NM_012353    | OR1C1        | 0.330758746024534 | 0 | 2.00E-04 | 1 | 0.0015 | 0 | NA | NA |
| NR_037676    | FRMD6-AS1    | 0.330758746024534 | 0 | 2.00E-04 | 1 | 0.0015 | 0 | NA | NA |
| NM_003891    | PROZ         | 0.330304407087687 | 0 | 2.00E-04 | 1 | 0.0015 | 0 | NA | NA |
| NM_001256134 | PROZ         | 0.330304407087687 | 0 | 2.00E-04 | 1 | 0.0015 | 0 | NA | NA |
| NM_019010    | KRT20        | 0.330304407087687 | 0 | 2.00E-04 | 1 | 0.0015 | 0 | NA | NA |



|              |           |                   |                   |          |        |        |          |    |    |
|--------------|-----------|-------------------|-------------------|----------|--------|--------|----------|----|----|
| NM_153237    | TMEM252   | 0.330304407087687 | 0                 | 2.00E-04 | 1      | 0.0015 | 0        | NA | NA |
| NM_001169107 | FAM21C    | 0.329850068150841 | 0                 | 2.00E-04 | 1      | 0.0015 | 0        | NA | NA |
| NM_001169106 | FAM21C    | 0.329850068150841 | 0                 | 2.00E-04 | 1      | 0.0015 | 0        | NA | NA |
| NM_015262    | FAM21C    | 0.329850068150841 | 0                 | 2.00E-04 | 1      | 0.0015 | 0        | NA | NA |
| NM_198329    | UBA5      | 0.329850068150841 | 0                 | 2.00E-04 | 1      | 0.0015 | 0        | NA | NA |
| NM_032926    | TCEAL3    | 0.329850068150841 | 0                 | 2.00E-04 | 1      | 0.0015 | 0        | NA | NA |
| NM_001006933 | TCEAL3    | 0.329850068150841 | 0                 | 2.00E-04 | 1      | 0.0015 | 0        | NA | NA |
| NM_004213    | SLC28A1   | 0.329395729213994 | 0                 | 2.00E-04 | 1      | 0.0015 | 0        | NA | NA |
| NM_201651    | SLC28A1   | 0.329395729213994 | 0                 | 2.00E-04 | 1      | 0.0015 | 0        | NA | NA |
| NM_015595    | ARHGEF26  | 0.329395729213994 | 0                 | 2.00E-04 | 1      | 0.0015 | 0        | NA | NA |
| NM_001251963 | ARHGEF26  | 0.329395729213994 | 0                 | 2.00E-04 | 1      | 0.0015 | 0        | NA | NA |
| NM_181684    | KRTAP12-2 | 0.328941390277147 | 0                 | 2.00E-04 | 1      | 0.0015 | 0        | NA | NA |
| NM_020666    | CLK4      | 0.328941390277147 | 0                 | 2.00E-04 | 1      | 0.0015 | 0        | NA | NA |
| NR_001435    | HLA-DPB2  | 0.3284870513403   | 0                 | 2.00E-04 | 1      | 0.0015 | 0        | NA | NA |
| NM_001079534 | CPEB1     | 0.3284870513403   | 0                 | 2.00E-04 | 1      | 0.0015 | 0        | NA | NA |
| NM_001079533 | CPEB1     | 0.3284870513403   | 0                 | 2.00E-04 | 1      | 0.0015 | 0        | NA | NA |
| NM_001079535 | CPEB1     | 0.3284870513403   | 0                 | 2.00E-04 | 1      | 0.0015 | 0        | NA | NA |
| NM_173358    | SSX7      | 0.3284870513403   | 0                 | 2.00E-04 | 1      | 0.0015 | 0        | NA | NA |
| NM_004992    | MECP2     | 0.328032712403453 | 0                 | 2.00E-04 | 1      | 0.0015 | 0        | NA | NA |
| NM_001110792 | MECP2     | 0.328032712403453 | 0                 | 2.00E-04 | 1      | 0.0015 | 0        | NA | NA |
| NM_017857    | SSH3      | 0.327578373466606 | 0                 | 8.00E-04 | 0.9998 | 0.0072 | 2.00E-04 | NA | NA |
| NM_006984    | CLDN10    | 0.327578373466606 | 0                 | 2.00E-04 | 1      | 0.0015 | 0        | NA | NA |
| NM_001242640 | BRCC3     | 0.327578373466606 | 0                 | 2.00E-04 | 1      | 0.0015 | 0        | NA | NA |
| NM_024332    | BRCC3     | 0.327578373466606 | 0                 | 2.00E-04 | 1      | 0.0015 | 0        | NA | NA |
| NM_001018055 | BRCC3     | 0.327578373466606 | 0                 | 2.00E-04 | 1      | 0.0015 | 0        | NA | NA |
| NM_001143937 | PSMA1     | 0.327578373466606 | 0                 | 2.00E-04 | 1      | 0.0015 | 0        | NA | NA |
| NM_002786    | PSMA1     | 0.327578373466606 | 0                 | 2.00E-04 | 1      | 0.0015 | 0        | NA | NA |
| NM_001163148 | ETV1      | 0.327124034529759 | 0                 | 2.00E-04 | 1      | 0.0015 | 0        | NA | NA |
| NM_001163149 | ETV1      | 0.327124034529759 | 0                 | 2.00E-04 | 1      | 0.0015 | 0        | NA | NA |
| NM_001282279 | PYCR1     | 0.472512494320763 | 0.145388459791004 | 2.00E-04 | 1      | 0.0015 | 0        | NA | NA |
| NM_001282280 | PYCR1     | 0.472512494320763 | 0.145388459791004 | 2.00E-04 | 1      | 0.0015 | 0        | NA | NA |
| NM_001159747 | CC2D2B    | 0.326669695592912 | 0                 | 2.00E-04 | 1      | 0.0015 | 0        | NA | NA |
| NM_001001732 | CC2D2B    | 0.326669695592912 | 0                 | 2.00E-04 | 1      | 0.0015 | 0        | NA | NA |
| NM_001195685 | LYPD6     | 0.326669695592912 | 0                 | 2.00E-04 | 1      | 0.0015 | 0        | NA | NA |
| NM_001166163 | PPP1R9A   | 0.326669695592912 | 0                 | 2.00E-04 | 1      | 0.0015 | 0        | NA | NA |
| NM_001166161 | PPP1R9A   | 0.326669695592912 | 0                 | 2.00E-04 | 1      | 0.0015 | 0        | NA | NA |
| NM_001166162 | PPP1R9A   | 0.326669695592912 | 0                 | 2.00E-04 | 1      | 0.0015 | 0        | NA | NA |
| NM_001005169 | OR52I1    | 0.326215356656065 | 0                 | 2.00E-04 | 1      | 0.0015 | 0        | NA | NA |
| NM_003852    | TRIM24    | 0.326215356656065 | 0                 | 2.00E-04 | 1      | 0.0015 | 0        | NA | NA |
| NM_015905    | TRIM24    | 0.326215356656065 | 0                 | 2.00E-04 | 1      | 0.0015 | 0        | NA | NA |
| NM_001172700 | SHROOM1   | 0.326215356656065 | 0                 | 2.00E-04 | 1      | 0.0015 | 0        | NA | NA |
| NM_001136275 | AKIRIN1   | 0.325761017719219 | 0                 | 2.00E-04 | 1      | 0.0015 | 0        | NA | NA |
| NM_024595    | AKIRIN1   | 0.325761017719219 | 0                 | 2.00E-04 | 1      | 0.0015 | 0        | NA | NA |
| NM_001270410 | LIN9      | 0.325761017719219 | 0                 | 2.00E-04 | 1      | 0.0015 | 0        | NA | NA |
| NM_001270409 | LIN9      | 0.325761017719219 | 0                 | 2.00E-04 | 1      | 0.0015 | 0        | NA | NA |
| NM_173083    | LIN9      | 0.325761017719219 | 0                 | 2.00E-04 | 1      | 0.0015 | 0        | NA | NA |
| NM_145203    | CSNK1A1L  | 0.325761017719219 | 0                 | 2.00E-04 | 1      | 0.0015 | 0        | NA | NA |

|              |                 |                   |                   |          |   |        |   |    |    |
|--------------|-----------------|-------------------|-------------------|----------|---|--------|---|----|----|
| NM_001164356 | THAP4           | 0.325761017719219 | 0                 | 2.00E-04 | 1 | 0.0015 | 0 | NA | NA |
| NM_021804    | ACE2            | 0.325761017719219 | 0                 | 2.00E-04 | 1 | 0.0015 | 0 | NA | NA |
| NM_080928    | ASB15           | 0.325306678782372 | 0                 | 2.00E-04 | 1 | 0.0015 | 0 | NA | NA |
| NM_000992    | RPL29           | 0.325306678782372 | 0                 | 2.00E-04 | 1 | 0.0015 | 0 | NA | NA |
| NM_000697    | ALOX12          | 0.506133575647433 | 0.180826896865061 | 2.00E-04 | 1 | 0.0015 | 0 | NA | NA |
| NM_000070    | CAPN3           | 0.324852339845525 | 0                 | 2.00E-04 | 1 | 0.0015 | 0 | NA | NA |
| NM_173087    | CAPN3           | 0.324852339845525 | 0                 | 2.00E-04 | 1 | 0.0015 | 0 | NA | NA |
| NM_024344    | CAPN3           | 0.324852339845525 | 0                 | 2.00E-04 | 1 | 0.0015 | 0 | NA | NA |
| NM_006910    | RBBP6           | 0.324852339845525 | 0                 | 2.00E-04 | 1 | 0.0015 | 0 | NA | NA |
| NM_018703    | RBBP6           | 0.324852339845525 | 0                 | 2.00E-04 | 1 | 0.0015 | 0 | NA | NA |
| NM_032626    | RBBP6           | 0.324852339845525 | 0                 | 2.00E-04 | 1 | 0.0015 | 0 | NA | NA |
| NR_039875    | MIR4723         | 0.324398000908678 | 0                 | 2.00E-04 | 1 | 0.0015 | 0 | NA | NA |
| NM_015295    | SMCHD1          | 0.324398000908678 | 0                 | 2.00E-04 | 1 | 0.0015 | 0 | NA | NA |
| NM_004815    | ARHGAP29        | 0.324398000908678 | 0                 | 2.00E-04 | 1 | 0.0015 | 0 | NA | NA |
| NM_139315    | TAF6            | 0.324398000908678 | 0                 | 2.00E-04 | 1 | 0.0015 | 0 | NA | NA |
| NR_033792    | TAF6            | 0.324398000908678 | 0                 | 2.00E-04 | 1 | 0.0015 | 0 | NA | NA |
| NM_005641    | TAF6            | 0.324398000908678 | 0                 | 2.00E-04 | 1 | 0.0015 | 0 | NA | NA |
| NM_001190415 | TAF6            | 0.324398000908678 | 0                 | 2.00E-04 | 1 | 0.0015 | 0 | NA | NA |
| NM_001163264 | PCYT1B          | 0.324398000908678 | 0                 | 2.00E-04 | 1 | 0.0015 | 0 | NA | NA |
| NM_001281429 | PCED1B          | 0.323943661971831 | 0                 | 2.00E-04 | 1 | 0.0015 | 0 | NA | NA |
| NM_138371    | PCED1B          | 0.323943661971831 | 0                 | 2.00E-04 | 1 | 0.0015 | 0 | NA | NA |
| NM_001024075 | HNMT            | 0.323943661971831 | 0                 | 2.00E-04 | 1 | 0.0015 | 0 | NA | NA |
| NM_001024074 | HNMT            | 0.323943661971831 | 0                 | 2.00E-04 | 1 | 0.0015 | 0 | NA | NA |
| NM_006895    | HNMT            | 0.323943661971831 | 0                 | 2.00E-04 | 1 | 0.0015 | 0 | NA | NA |
| NM_016485    | VTA1            | 0.323943661971831 | 0                 | 2.00E-04 | 1 | 0.0015 | 0 | NA | NA |
| NM_198511    | LANCL3          | 0.421172194457065 | 0.097228532485234 | 2.00E-04 | 1 | 0.0015 | 0 | NA | NA |
| NM_001170331 | LANCL3          | 0.421172194457065 | 0.097228532485234 | 2.00E-04 | 1 | 0.0015 | 0 | NA | NA |
| NM_006234    | POLR2J          | 0.323943661971831 | 0                 | 2.00E-04 | 1 | 0.0015 | 0 | NA | NA |
| NM_004162    | RAB5A           | 0.467514766015448 | 0.144025442980463 | 2.00E-04 | 1 | 0.0015 | 0 | NA | NA |
| NM_001037329 | CNGA4           | 0.323489323034984 | 0                 | 2.00E-04 | 1 | 0.0015 | 0 | NA | NA |
| NM_001160213 | PMFBP1          | 0.323489323034984 | 0                 | 2.00E-04 | 1 | 0.0015 | 0 | NA | NA |
| NM_031293    | PMFBP1          | 0.323489323034984 | 0                 | 2.00E-04 | 1 | 0.0015 | 0 | NA | NA |
| NM_006664    | CCL27           | 0.323489323034984 | 0                 | 2.00E-04 | 1 | 0.0015 | 0 | NA | NA |
| NM_018958    | NPAP1           | 0.323034984098137 | 0                 | 2.00E-04 | 1 | 0.0015 | 0 | NA | NA |
| NM_181686    | KRTAP12-1       | 0.323034984098137 | 0                 | 2.00E-04 | 1 | 0.0015 | 0 | NA | NA |
| NM_052966    | FAM129A         | 0.32258064516129  | 0                 | 2.00E-04 | 1 | 0.0015 | 0 | NA | NA |
| NM_004995    | MMP14           | 0.322126306224443 | 0                 | 2.00E-04 | 1 | 0.0015 | 0 | NA | NA |
| NM_001204078 | ATP6V1G2        | 0.322126306224443 | 0                 | 2.00E-04 | 1 | 0.0015 | 0 | NA | NA |
| NM_138282    | ATP6V1G2        | 0.322126306224443 | 0                 | 2.00E-04 | 1 | 0.0015 | 0 | NA | NA |
| NR_037853    | ATP6V1G2-DDX39B | 0.322126306224443 | 0                 | 2.00E-04 | 1 | 0.0015 | 0 | NA | NA |
| NM_130463    | ATP6V1G2        | 0.322126306224443 | 0                 | 2.00E-04 | 1 | 0.0015 | 0 | NA | NA |
| NM_017666    | ZNF280C         | 0.322126306224443 | 0                 | 2.00E-04 | 1 | 0.0015 | 0 | NA | NA |
| NM_033313    | CDC14A          | 0.321671967287597 | 0                 | 2.00E-04 | 1 | 0.0015 | 0 | NA | NA |
| NM_033312    | CDC14A          | 0.321671967287597 | 0                 | 2.00E-04 | 1 | 0.0015 | 0 | NA | NA |
| NM_003672    | CDC14A          | 0.321671967287597 | 0                 | 2.00E-04 | 1 | 0.0015 | 0 | NA | NA |
| NM_173553    | TRIML2          | 0.321671967287597 | 0                 | 2.00E-04 | 1 | 0.0015 | 0 | NA | NA |
| NM_021949    | ATP2B3          | 0.32121762835075  | 0                 | 2.00E-04 | 1 | 0.0015 | 0 | NA | NA |

|              |           |                   |                    |          |        |        |          |    |    |
|--------------|-----------|-------------------|--------------------|----------|--------|--------|----------|----|----|
| NM_001001344 | ATP2B3    | 0.32121762835075  | 0                  | 2.00E-04 | 1      | 0.0015 | 0        | NA | NA |
| NM_001143677 | SGK1      | 0.32121762835075  | 0                  | 2.00E-04 | 1      | 0.0015 | 0        | NA | NA |
| NM_139266    | STAT1     | 0.320763289413903 | 0                  | 2.00E-04 | 1      | 0.0015 | 0        | NA | NA |
| NM_007315    | STAT1     | 0.320763289413903 | 0                  | 2.00E-04 | 1      | 0.0015 | 0        | NA | NA |
| NM_002155    | HSPA6     | 0.320308950477056 | 0                  | 2.00E-04 | 1      | 0.0015 | 0        | NA | NA |
| NM_005024    | SERPINB10 | 0.320308950477056 | 0                  | 2.00E-04 | 1      | 0.0015 | 0        | NA | NA |
| NM_001732    | BTN1A1    | 0.320308950477056 | 0                  | 4.00E-04 | 1      | 0.0037 | 1.00E-04 | NA | NA |
| NM_001136469 | TMEM108   | 0.472512494320763 | 0.152657882780554  | 2.00E-04 | 1      | 0.0015 | 0        | NA | NA |
| NM_023943    | TMEM108   | 0.472512494320763 | 0.152657882780554  | 2.00E-04 | 1      | 0.0015 | 0        | NA | NA |
| NM_001689    | ATP5G3    | 0.319854611540209 | 0                  | 2.00E-04 | 1      | 0.0015 | 0        | NA | NA |
| NM_001190329 | ATP5G3    | 0.319854611540209 | 0                  | 2.00E-04 | 1      | 0.0015 | 0        | NA | NA |
| NM_032424    | MSANTD4   | 0.347569286687869 | 0.028169014084507  | 2.00E-04 | 1      | 0.0015 | 0        | NA | NA |
| NM_012369    | OR2F1     | 0.318945933666515 | 0                  | 2.00E-04 | 1      | 0.0015 | 0        | NA | NA |
| NM_001162916 | TYW3      | 0.318491594729668 | 0                  | 2.00E-04 | 1      | 0.0015 | 0        | NA | NA |
| NR_027962    | TYW3      | 0.318491594729668 | 0                  | 2.00E-04 | 1      | 0.0015 | 0        | NA | NA |
| NM_138467    | TYW3      | 0.318491594729668 | 0                  | 2.00E-04 | 1      | 0.0015 | 0        | NA | NA |
| NM_001284241 | CCSER2    | 0.318491594729668 | 0                  | 2.00E-04 | 1      | 0.0015 | 0        | NA | NA |
| NM_001284240 | CCSER2    | 0.318491594729668 | 0                  | 2.00E-04 | 1      | 0.0015 | 0        | NA | NA |
| NM_018999    | CCSER2    | 0.318491594729668 | 0                  | 2.00E-04 | 1      | 0.0015 | 0        | NA | NA |
| NM_016166    | PIAS1     | 0.318491594729668 | 0                  | 2.00E-04 | 1      | 0.0015 | 0        | NA | NA |
| NM_024919    | FRMD1     | 0.318491594729668 | 0                  | 2.00E-04 | 1      | 0.0015 | 0        | NA | NA |
| NM_001142306 | C5orf60   | 0.318037255792821 | 0                  | 2.00E-04 | 1      | 0.0015 | 0        | NA | NA |
| NM_001130711 | CLEC2A    | 0.317582916855975 | 0                  | 2.00E-04 | 1      | 0.0015 | 0        | NA | NA |
| NR_039739    | MIR4514   | 0.317582916855975 | 0                  | 2.00E-04 | 1      | 0.0015 | 0        | NA | NA |
| NM_153377    | LRIG3     | 0.317128577919128 | 0                  | 2.00E-04 | 1      | 0.0015 | 0        | NA | NA |
| NM_001178098 | CD19      | 0.316674238982281 | 0                  | 2.00E-04 | 1      | 0.0015 | 0        | NA | NA |
| NM_001770    | CD19      | 0.316674238982281 | 0                  | 4.00E-04 | 1      | 0.0037 | 1.00E-04 | NA | NA |
| NM_002830    | PTPN4     | 0.316674238982281 | 0                  | 2.00E-04 | 1      | 0.0015 | 0        | NA | NA |
| NM_014857    | RABGAP1L  | 0.316219900045434 | 0                  | 2.00E-04 | 1      | 0.0015 | 0        | NA | NA |
| NM_145892    | RBFOX1    | 0.439800090867787 | 0.123580190822353  | 2.00E-04 | 1      | 0.0015 | 0        | NA | NA |
| NM_145891    | RBFOX1    | 0.439800090867787 | 0.123580190822353  | 2.00E-04 | 1      | 0.0015 | 0        | NA | NA |
| NM_145893    | RBFOX1    | 0.439800090867787 | 0.123580190822353  | 2.00E-04 | 1      | 0.0015 | 0        | NA | NA |
| NM_014306    | RTCB      | 0.316219900045434 | 0                  | 2.00E-04 | 1      | 0.0015 | 0        | NA | NA |
| NM_002771    | PRSS3     | 0.315765561108587 | 0                  | 2.00E-04 | 1      | 0.0015 | 0        | NA | NA |
| NM_003934    | FUBP3     | 0.315765561108587 | 0                  | 2.00E-04 | 1      | 0.0015 | 0        | NA | NA |
| NR_073130    | CDH19     | 0.315765561108587 | 0                  | 2.00E-04 | 1      | 0.0015 | 0        | NA | NA |
| NM_021153    | CDH19     | 0.315765561108587 | 0                  | 2.00E-04 | 1      | 0.0015 | 0        | NA | NA |
| NM_001271028 | CDH19     | 0.315765561108587 | 0                  | 2.00E-04 | 1      | 0.0015 | 0        | NA | NA |
| NM_005235    | ERBB4     | 0.315765561108587 | 0                  | 2.00E-04 | 1      | 0.0015 | 0        | NA | NA |
| NM_001042599 | ERBB4     | 0.315765561108587 | 0                  | 2.00E-04 | 1      | 0.0015 | 0        | NA | NA |
| NM_170732    | BDNF      | 0.381190368014539 | 0.0667878237164925 | 2.00E-04 | 1      | 0.0015 | 0        | NA | NA |
| NM_001143806 | BDNF      | 0.381190368014539 | 0.0667878237164925 | 2.00E-04 | 1      | 0.0015 | 0        | NA | NA |
| NM_001143805 | BDNF      | 0.381190368014539 | 0.0667878237164925 | 2.00E-04 | 1      | 0.0015 | 0        | NA | NA |
| NM_005002    | NDUFA9    | 0.314402544298046 | 0                  | 2.00E-04 | 1      | 0.0015 | 0        | NA | NA |
| NM_178543    | ENPP7     | 0.314402544298046 | 0                  | 6.00E-04 | 0.9998 | 0.005  | 1.00E-04 | NA | NA |
| NM_001146182 | KRTAP16-1 | 0.314402544298046 | 0                  | 2.00E-04 | 0.9998 | 0.0015 | 0        | NA | NA |
| NM_001450    | FHL2      | 0.314402544298046 | 0                  | 2.00E-04 | 1      | 0.0015 | 0        | NA | NA |

|              |                |                   |                    |          |   |        |          |    |    |
|--------------|----------------|-------------------|--------------------|----------|---|--------|----------|----|----|
| NM_001039492 | FHL2           | 0.314402544298046 | 0                  | 2.00E-04 | 1 | 0.0015 | 0        | NA | NA |
| NM_201555    | FHL2           | 0.314402544298046 | 0                  | 2.00E-04 | 1 | 0.0015 | 0        | NA | NA |
| NM_030572    | C12orf39       | 0.313948205361199 | 0                  | 2.00E-04 | 1 | 0.0015 | 0        | NA | NA |
| NM_198992    | SYT10          | 0.313948205361199 | 0                  | 2.00E-04 | 1 | 0.0015 | 0        | NA | NA |
| NM_152722    | HEPACAM        | 0.313493866424353 | 0                  | 2.00E-04 | 1 | 0.0015 | 0        | NA | NA |
| NM_001925    | DEFA4          | 0.313493866424353 | 0                  | 2.00E-04 | 1 | 0.0015 | 0        | NA | NA |
| NM_005456    | MAPK8IP1       | 0.333484779645616 | 0.0199909132212631 | 2.00E-04 | 1 | 0.0015 | 0        | NA | NA |
| NM_001282746 | ARMC3          | 0.313039527487506 | 0                  | 2.00E-04 | 1 | 0.0015 | 0        | NA | NA |
| NM_001282745 | ARMC3          | 0.313039527487506 | 0                  | 2.00E-04 | 1 | 0.0015 | 0        | NA | NA |
| NM_001282747 | ARMC3          | 0.313039527487506 | 0                  | 2.00E-04 | 1 | 0.0015 | 0        | NA | NA |
| NM_173081    | ARMC3          | 0.313039527487506 | 0                  | 2.00E-04 | 1 | 0.0015 | 0        | NA | NA |
| NM_001030006 | AP2B1          | 0.313039527487506 | 0                  | 2.00E-04 | 1 | 0.0015 | 0        | NA | NA |
| NM_001282    | AP2B1          | 0.313039527487506 | 0                  | 2.00E-04 | 1 | 0.0015 | 0        | NA | NA |
| NM_001282402 | MIXL1          | 0.312585188550659 | 0                  | 2.00E-04 | 1 | 0.0015 | 0        | NA | NA |
| NM_031944    | MIXL1          | 0.312585188550659 | 0                  | 2.00E-04 | 1 | 0.0015 | 0        | NA | NA |
| NM_001198844 | RBM4           | 0.312585188550659 | 0                  | 2.00E-04 | 1 | 0.0015 | 0        | NA | NA |
| NM_002896    | RBM4           | 0.312585188550659 | 0                  | 2.00E-04 | 1 | 0.0015 | 0        | NA | NA |
| NM_001198843 | RBM4           | 0.312585188550659 | 0                  | 2.00E-04 | 1 | 0.0015 | 0        | NA | NA |
| NM_019604    | CRTAM          | 0.312585188550659 | 0                  | 2.00E-04 | 1 | 0.0015 | 0        | NA | NA |
| NM_014053    | FLVCR1         | 0.48023625624716  | 0.168105406633348  | 2.00E-04 | 1 | 0.0015 | 0        | NA | NA |
| NM_030968    | C1QTNF1        | 0.312130849613812 | 0                  | 2.00E-04 | 1 | 0.0015 | 0        | NA | NA |
| NM_198594    | C1QTNF1        | 0.312130849613812 | 0                  | 2.00E-04 | 1 | 0.0015 | 0        | NA | NA |
| NM_000608    | ORM2           | 0.311676510676965 | 0                  | 8.00E-04 | 1 | 0.0072 | 2.00E-04 | NA | NA |
| NM_014870    | ZBTB40         | 0.311222171740118 | 0                  | 2.00E-04 | 1 | 0.0015 | 0        | NA | NA |
| NM_001083621 | ZBTB40         | 0.311222171740118 | 0                  | 2.00E-04 | 1 | 0.0015 | 0        | NA | NA |
| NM_181724    | TMEM119        | 0.311222171740118 | 0                  | 2.00E-04 | 1 | 0.0015 | 0        | NA | NA |
| NM_021210    | TRAPPC1        | 0.311222171740118 | 0                  | 2.00E-04 | 1 | 0.0015 | 0        | NA | NA |
| NR_030684    | TRAPPC1        | 0.311222171740118 | 0                  | 2.00E-04 | 1 | 0.0015 | 0        | NA | NA |
| NM_198457    | ZNF600         | 0.311222171740118 | 0                  | 2.00E-04 | 1 | 0.0015 | 0        | NA | NA |
| NR_033361    | TMCC1          | 0.311222171740118 | 0                  | 2.00E-04 | 1 | 0.0015 | 0        | NA | NA |
| NR_037616    | BLOC1S5-TXNDC5 | 0.311222171740118 | 0                  | 2.00E-04 | 1 | 0.0015 | 0        | NA | NA |
| NM_001199322 | BLOC1S5        | 0.311222171740118 | 0                  | 2.00E-04 | 1 | 0.0015 | 0        | NA | NA |
| NM_201280    | BLOC1S5        | 0.311222171740118 | 0                  | 2.00E-04 | 1 | 0.0015 | 0        | NA | NA |
| NM_001199323 | BLOC1S5        | 0.311222171740118 | 0                  | 2.00E-04 | 1 | 0.0015 | 0        | NA | NA |
| NM_001024466 | SOD2           | 0.311222171740118 | 0                  | 2.00E-04 | 1 | 0.0015 | 0        | NA | NA |
| NM_001024465 | SOD2           | 0.311222171740118 | 0                  | 2.00E-04 | 1 | 0.0015 | 0        | NA | NA |
| NM_000636    | SOD2           | 0.311222171740118 | 0                  | 2.00E-04 | 1 | 0.0015 | 0        | NA | NA |
| NM_001199089 | TDRD5          | 0.427078600636075 | 0.116310767832803  | 2.00E-04 | 1 | 0.0015 | 0        | NA | NA |
| NM_019062    | RNF186         | 0.310767832803271 | 0                  | 2.00E-04 | 1 | 0.0015 | 0        | NA | NA |
| NM_174886    | TGIF1          | 0.310313493866424 | 0                  | 2.00E-04 | 1 | 0.0015 | 0        | NA | NA |
| NM_001242307 | PITRM1         | 0.310313493866424 | 0                  | 2.00E-04 | 1 | 0.0015 | 0        | NA | NA |
| NM_001242309 | PITRM1         | 0.310313493866424 | 0                  | 2.00E-04 | 1 | 0.0015 | 0        | NA | NA |
| NM_014889    | PITRM1         | 0.310313493866424 | 0                  | 2.00E-04 | 1 | 0.0015 | 0        | NA | NA |
| NM_003390    | WEE1           | 0.309859154929577 | 0                  | 2.00E-04 | 1 | 0.0015 | 0        | NA | NA |
| NM_001005339 | RGS10          | 0.309859154929577 | 0                  | 2.00E-04 | 1 | 0.0015 | 0        | NA | NA |
| NM_014716    | ACAP1          | 0.309404815992731 | 0                  | 2.00E-04 | 1 | 0.0015 | 0        | NA | NA |
| NM_001010873 | TSPO2          | 0.309404815992731 | 0                  | 2.00E-04 | 1 | 0.0015 | 0        | NA | NA |

|              |              |                   |                    |          |       |        |          |    |        |
|--------------|--------------|-------------------|--------------------|----------|-------|--------|----------|----|--------|
| NM_181744    | OPN5         | 0.309404815992731 | 0                  | 2.00E-04 | 1     | 0.0015 | 0        | NA | NA     |
| NM_001243429 | ERG          | 0.309404815992731 | 0                  | 2.00E-04 | 1     | 0.0015 | 0        | NA | NA     |
| NM_001884    | HAPLN1       | 0.308950477055884 | 0                  | 2.00E-04 | 1     | 0.0015 | 0        | NA | NA     |
| NM_001145399 | MPPED2       | 0.308496138119037 | 0                  | 2.00E-04 | 1     | 0.0015 | 0        | NA | NA     |
| NM_001004450 | OR1B1        | 0.308496138119037 | 0                  | 2.00E-04 | 1     | 0.0015 | 0        | NA | NA     |
| NM_001024674 | LIN52        | 0.30804179918219  | 0                  | 2.00E-04 | 1     | 0.0015 | 0        | NA | NA     |
| NM_004477    | FRG1         | 0.52703316674239  | 0.2189913675602    | 2.00E-04 | 1     | 0.0015 | 0        | 1  | 0.1452 |
| NM_138421    | SAAL1        | 0.30804179918219  | 0                  | 2.00E-04 | 1     | 0.0015 | 0        | NA | NA     |
| NM_002310    | LIFR         | 0.30804179918219  | 0                  | 2.00E-04 | 1     | 0.0015 | 0        | NA | NA     |
| NM_014547    | TMOD3        | 0.307587460245343 | 0                  | 2.00E-04 | 1     | 0.0015 | 0        | NA | NA     |
| NR_040021    | LOC100287792 | 0.307587460245343 | 0                  | 2.00E-04 | 1     | 0.0015 | 0        | NA | NA     |
| NM_001005327 | OR6K3        | 0.307587460245343 | 0                  | 2.00E-04 | 1     | 0.0015 | 0        | NA | NA     |
| NM_001005196 | OR8B4        | 0.307587460245343 | 0                  | 2.00E-04 | 1     | 0.0015 | 0        | NA | NA     |
| NM_138294    | PATE1        | 0.307133121308496 | 0                  | 2.00E-04 | 1     | 0.0015 | 0        | NA | NA     |
| NM_001206789 | TMPRSS13     | 0.307133121308496 | 0                  | 2.00E-04 | 1     | 0.0015 | 0        | NA | NA     |
| NM_001244995 | TMPRSS13     | 0.307133121308496 | 0                  | 2.00E-04 | 1     | 0.0015 | 0        | NA | NA     |
| NM_001077263 | TMPRSS13     | 0.307133121308496 | 0                  | 2.00E-04 | 1     | 0.0015 | 0        | NA | NA     |
| NM_001206790 | TMPRSS13     | 0.307133121308496 | 0                  | 2.00E-04 | 1     | 0.0015 | 0        | NA | NA     |
| NM_001190255 | ZNF630       | 0.307133121308496 | 0                  | 2.00E-04 | 1     | 0.0015 | 0        | NA | NA     |
| NM_001282201 | ZNF630       | 0.307133121308496 | 0                  | 2.00E-04 | 1     | 0.0015 | 0        | NA | NA     |
| NM_001282202 | ZNF630       | 0.307133121308496 | 0                  | 2.00E-04 | 1     | 0.0015 | 0        | NA | NA     |
| NM_001025199 | CHI3L2       | 0.351203998182644 | 0.0440708768741481 | 0.001    | 0.999 | 0.0072 | 2.00E-04 | NA | NA     |
| NM_001086521 | C17orf89     | 0.306678782371649 | 0                  | 4.00E-04 | 1     | 0.0037 | 1.00E-04 | NA | NA     |
| NM_020866    | KLHL1        | 0.306678782371649 | 0                  | 2.00E-04 | 1     | 0.0015 | 0        | NA | NA     |
| NM_001284306 | ZNF106       | 0.306678782371649 | 0                  | 2.00E-04 | 1     | 0.0015 | 0        | NA | NA     |
| NM_022473    | ZNF106       | 0.306678782371649 | 0                  | 2.00E-04 | 1     | 0.0015 | 0        | NA | NA     |
| NM_003031    | SIAH1        | 0.306678782371649 | 0                  | 2.00E-04 | 1     | 0.0015 | 0        | NA | NA     |
| NM_172206    | CAMKK1       | 0.306678782371649 | 0                  | 4.00E-04 | 1     | 0.0037 | 1.00E-04 | NA | NA     |
| NM_001258312 | PDE1A        | 0.306678782371649 | 0                  | 2.00E-04 | 1     | 0.0015 | 0        | NA | NA     |
| NM_001003683 | PDE1A        | 0.306678782371649 | 0                  | 2.00E-04 | 1     | 0.0015 | 0        | NA | NA     |
| NM_007156    | ZXDA         | 0.306678782371649 | 0                  | 2.00E-04 | 1     | 0.0015 | 0        | NA | NA     |
| NM_031303    | KATNAL2      | 0.402998636983189 | 0.0963198546115402 | 2.00E-04 | 1     | 0.0015 | 0        | NA | NA     |
| NM_020989    | CRYGC        | 0.306224443434802 | 0                  | 2.00E-04 | 1     | 0.0015 | 0        | NA | NA     |
| NM_152543    | C4orf45      | 0.306224443434802 | 0                  | 2.00E-04 | 1     | 0.0015 | 0        | NA | NA     |
| NR_037889    | LOC285626    | 0.305770104497955 | 0                  | 2.00E-04 | 1     | 0.0015 | 0        | NA | NA     |
| NM_001122764 | PPOX         | 0.305315765561109 | 0                  | 2.00E-04 | 1     | 0.0015 | 0        | NA | NA     |
| NM_000309    | PPOX         | 0.305315765561109 | 0                  | 2.00E-04 | 1     | 0.0015 | 0        | NA | NA     |
| NM_015971    | MRPS7        | 0.305315765561109 | 0                  | 2.00E-04 | 1     | 0.0015 | 0        | NA | NA     |
| NM_145282    | SLC25A48     | 0.305315765561109 | 0                  | 2.00E-04 | 1     | 0.0015 | 0        | NA | NA     |
| NM_001004723 | OR4N2        | 0.420263516583371 | 0.114947751022263  | 2.00E-04 | 1     | 0.0015 | 0        | NA | NA     |
| NM_152706    | C7orf62      | 0.460699681962744 | 0.155383916401636  | 2.00E-04 | 1     | 0.0015 | 0        | NA | NA     |
| NM_001198541 | ERAP1        | 0.402544298046343 | 0.0976828714220809 | 2.00E-04 | 1     | 0.0015 | 0        | NA | NA     |
| NM_007019    | UBE2C        | 0.304861426624262 | 0                  | 2.00E-04 | 1     | 0.0015 | 0        | NA | NA     |
| NM_181800    | UBE2C        | 0.304861426624262 | 0                  | 2.00E-04 | 1     | 0.0015 | 0        | NA | NA     |
| NM_181799    | UBE2C        | 0.304861426624262 | 0                  | 2.00E-04 | 1     | 0.0015 | 0        | NA | NA     |
| NR_104037    | UBE2C        | 0.304861426624262 | 0                  | 2.00E-04 | 1     | 0.0015 | 0        | NA | NA     |
| NR_104036    | UBE2C        | 0.304861426624262 | 0                  | 2.00E-04 | 1     | 0.0015 | 0        | NA | NA     |

|              |            |                   |                   |          |        |        |        |    |    |
|--------------|------------|-------------------|-------------------|----------|--------|--------|--------|----|----|
| NM_001281742 | UBE2C      | 0.304861426624262 | 0                 | 2.00E-04 | 1      | 0.0015 | 0      | NA | NA |
| NM_001281741 | UBE2C      | 0.304861426624262 | 0                 | 2.00E-04 | 1      | 0.0015 | 0      | NA | NA |
| NM_002363    | MAGEB1     | 0.304861426624262 | 0                 | 2.00E-04 | 1      | 0.0015 | 0      | NA | NA |
| NM_177415    | MAGEB1     | 0.304861426624262 | 0                 | 2.00E-04 | 1      | 0.0015 | 0      | NA | NA |
| NM_002960    | S100A3     | 0.304861426624262 | 0                 | 2.00E-04 | 1      | 0.0015 | 0      | NA | NA |
| NM_001004758 | OR51S1     | 0.304861426624262 | 0                 | 2.00E-04 | 1      | 0.0015 | 0      | NA | NA |
| NM_001243392 | SLC6A13    | 0.457064970467969 | 0.152203543843707 | 2.00E-04 | 1      | 0.0015 | 0      | NA | NA |
| NM_001190997 | SLC6A13    | 0.457064970467969 | 0.152203543843707 | 2.00E-04 | 1      | 0.0015 | 0      | NA | NA |
| NM_016615    | SLC6A13    | 0.457064970467969 | 0.152203543843707 | 2.00E-04 | 1      | 0.0015 | 0      | NA | NA |
| NM_032230    | METTL25    | 0.303498409813721 | 0                 | 2.00E-04 | 1      | 0.0015 | 0      | NA | NA |
| NM_153236    | GIMAP7     | 0.303498409813721 | 0                 | 2.00E-04 | 1      | 0.0015 | 0      | NA | NA |
| NM_003550    | MAD1L1     | 0.303498409813721 | 0                 | 2.00E-04 | 1      | 0.0015 | 0      | NA | NA |
| NM_001013836 | MAD1L1     | 0.303498409813721 | 0                 | 2.00E-04 | 1      | 0.0015 | 0      | NA | NA |
| NM_001013837 | MAD1L1     | 0.303498409813721 | 0                 | 2.00E-04 | 1      | 0.0015 | 0      | NA | NA |
| NM_001001916 | OR52J3     | 0.303044070876874 | 0                 | 2.00E-04 | 1      | 0.0015 | 0      | NA | NA |
| NM_002335    | LRP5       | 0.303044070876874 | 0                 | 2.00E-04 | 1      | 0.0015 | 0      | NA | NA |
| NM_005593    | MYF5       | 0.303044070876874 | 0                 | 2.00E-04 | 1      | 0.0015 | 0      | NA | NA |
| NM_012417    | PITPNC1    | 0.303044070876874 | 0                 | 2.00E-04 | 1      | 0.0015 | 0      | NA | NA |
| NM_181671    | PITPNC1    | 0.303044070876874 | 0                 | 2.00E-04 | 1      | 0.0015 | 0      | NA | NA |
| NM_001080419 | UNK        | 0.303044070876874 | 0                 | 2.00E-04 | 1      | 0.0015 | 0      | NA | NA |
| NR_038131    | UNK        | 0.303044070876874 | 0                 | 2.00E-04 | 1      | 0.0015 | 0      | NA | NA |
| NR_026719    | DSCR9      | 0.303044070876874 | 0                 | 2.00E-04 | 1      | 0.0015 | 0      | NA | NA |
| NM_198485    | TPRG1      | 0.303044070876874 | 0                 | 2.00E-04 | 1      | 0.0015 | 0      | NA | NA |
| NR_038210    | SAMD12-AS1 | 0.303044070876874 | 0                 | 2.00E-04 | 1      | 0.0015 | 0      | NA | NA |
| NM_001256827 | SMG6       | 0.303044070876874 | 0                 | 2.00E-04 | 1      | 0.0015 | 0      | NA | NA |
| NM_001282631 | ARSE       | 0.303044070876874 | 0                 | 2.00E-04 | 1      | 0.0015 | 0      | NA | NA |
| NM_001734    | C1S        | 0.302589731940027 | 0                 | 2.00E-04 | 1      | 0.0015 | 0      | NA | NA |
| NM_201442    | C1S        | 0.302589731940027 | 0                 | 2.00E-04 | 1      | 0.0015 | 0      | NA | NA |
| NM_000916    | OXTR       | 0.302589731940027 | 0                 | 2.00E-04 | 1      | 0.0015 | 0      | NA | NA |
| NM_014817    | TRIL       | 0.302589731940027 | 0                 | 2.00E-04 | 1      | 0.0015 | 0      | NA | NA |
| NM_198827    | GPR133     | 0.30213539300318  | 0                 | 0.0494   | 0.9522 | 0.42   | 0.0091 | NA | NA |
| NM_001167941 | WDR76      | 0.30213539300318  | 0                 | 2.00E-04 | 1      | 0.0015 | 0      | NA | NA |
| NM_024908    | WDR76      | 0.30213539300318  | 0                 | 2.00E-04 | 1      | 0.0015 | 0      | NA | NA |
| NM_030642    | APOL5      | 0.30213539300318  | 0                 | 2.00E-04 | 1      | 0.0015 | 0      | NA | NA |
| NM_014395    | DAPP1      | 0.301681054066333 | 0                 | 2.00E-04 | 1      | 0.0015 | 0      | NA | NA |
| NM_198836    | ACACA      | 0.301681054066333 | 0                 | 2.00E-04 | 1      | 0.0015 | 0      | NA | NA |
| NM_004827    | ABCG2      | 0.301681054066333 | 0                 | 2.00E-04 | 1      | 0.0015 | 0      | NA | NA |
| NM_002350    | LYN        | 0.301226715129487 | 0                 | 2.00E-04 | 1      | 0.0015 | 0      | NA | NA |
| NM_001111097 | LYN        | 0.301226715129487 | 0                 | 2.00E-04 | 1      | 0.0015 | 0      | NA | NA |
| NR_040017    | RNF157-AS1 | 0.30077237619264  | 0                 | 2.00E-04 | 1      | 0.0015 | 0      | NA | NA |
| NR_028402    | CSRP2BP    | 0.30077237619264  | 0                 | 2.00E-04 | 1      | 0.0015 | 0      | NA | NA |
| NM_144489    | RGS3       | 0.30077237619264  | 0                 | 2.00E-04 | 1      | 0.0015 | 0      | NA | NA |
| NM_175698    | SSX2       | 0.30077237619264  | 0                 | 2.00E-04 | 1      | 0.0015 | 0      | NA | NA |
| NM_003147    | SSX2       | 0.30077237619264  | 0                 | 2.00E-04 | 1      | 0.0015 | 0      | NA | NA |
| NM_001164417 | SSX2B      | 0.30077237619264  | 0                 | 2.00E-04 | 1      | 0.0015 | 0      | NA | NA |
| NM_001278701 | SSX2B      | 0.30077237619264  | 0                 | 2.00E-04 | 1      | 0.0015 | 0      | NA | NA |
| NM_001281806 | FSD2       | 0.30077237619264  | 0                 | 2.00E-04 | 1      | 0.0015 | 0      | NA | NA |

|              |              |                   |                   |          |          |        |    |        |          |
|--------------|--------------|-------------------|-------------------|----------|----------|--------|----|--------|----------|
| NM_001007122 | FSD2         | 0.30077237619264  | 0                 | 2.00E-04 | 1        | 0.0015 | 0  | NA     | NA       |
| NM_001281805 | FSD2         | 0.30077237619264  | 0                 | 2.00E-04 | 1        | 0.0015 | 0  | NA     | NA       |
| NM_004781    | VAMP3        | 0.300318037255793 | 0                 | 2.00E-04 | 1        | 0.0015 | 0  | NA     | NA       |
| NM_005047    | PSMD5        | 0.300318037255793 | 0                 | 2.00E-04 | 1        | 0.0015 | 0  | NA     | NA       |
| NM_001270427 | PSMD5        | 0.300318037255793 | 0                 | 2.00E-04 | 1        | 0.0015 | 0  | NA     | NA       |
| NM_001127645 | GABRA1       | 0                 | 0.300318037255793 | 1        | 2.00E-04 | NA     | NA | 0.0023 | 0        |
| NR_024554    | RHOBTB1      | 0                 | 0.300318037255793 | 1        | 2.00E-04 | NA     | NA | 0.0023 | 0        |
| NM_012465    | TLL2         | 0                 | 0.300318037255793 | 1        | 2.00E-04 | NA     | NA | 0.0023 | 0        |
| NM_138568    | EXOC3L2      | 0                 | 0.300318037255793 | 1        | 2.00E-04 | NA     | NA | 0.0023 | 0        |
| NM_020144    | PAPOLB       | 0                 | 0.300318037255793 | 1        | 6.00E-04 | NA     | NA | 0.0099 | 1.00E-04 |
| NM_001130727 | PACRGL       | 0.152657882780554 | 0.453430258973194 | 1        | 2.00E-04 | NA     | NA | 0.0023 | 0        |
| NM_145048    | PACRGL       | 0.152657882780554 | 0.453430258973194 | 1        | 2.00E-04 | NA     | NA | 0.0023 | 0        |
| NM_001258346 | PACRGL       | 0.152657882780554 | 0.453430258973194 | 1        | 2.00E-04 | NA     | NA | 0.0023 | 0        |
| NM_001258345 | PACRGL       | 0.152657882780554 | 0.453430258973194 | 1        | 2.00E-04 | NA     | NA | 0.0023 | 0        |
| NR_047661    | PACRGL       | 0.152657882780554 | 0.453430258973194 | 1        | 2.00E-04 | NA     | NA | 0.0023 | 0        |
| NM_018172    | FAM86C1      | 0                 | 0.30077237619264  | 1        | 2.00E-04 | NA     | NA | 0.0023 | 0        |
| NM_001099653 | FAM86C1      | 0                 | 0.30077237619264  | 1        | 2.00E-04 | NA     | NA | 0.0023 | 0        |
| NM_152563    | FAM86C1      | 0                 | 0.30077237619264  | 1        | 2.00E-04 | NA     | NA | 0.0023 | 0        |
| NM_001276286 | BBX          | 0                 | 0.30077237619264  | 1        | 2.00E-04 | NA     | NA | 0.0023 | 0        |
| NM_001142568 | BBX          | 0                 | 0.30077237619264  | 1        | 2.00E-04 | NA     | NA | 0.0023 | 0        |
| NM_020235    | BBX          | 0                 | 0.30077237619264  | 1        | 2.00E-04 | NA     | NA | 0.0023 | 0        |
| NR_029192    | LOC100133315 | 0                 | 0.30077237619264  | 1        | 2.00E-04 | NA     | NA | 0.0023 | 0        |
| NM_173074    | PIGF         | 0                 | 0.30077237619264  | 1        | 2.00E-04 | NA     | NA | 0.0023 | 0        |
| NM_002643    | PIGF         | 0                 | 0.30077237619264  | 1        | 2.00E-04 | NA     | NA | 0.0023 | 0        |
| NR_103826    | EOGT         | 0                 | 0.30077237619264  | 1        | 2.00E-04 | NA     | NA | 0.0023 | 0        |
| NM_001278689 | EOGT         | 0                 | 0.30077237619264  | 1        | 2.00E-04 | NA     | NA | 0.0023 | 0        |
| NM_173654    | EOGT         | 0                 | 0.30077237619264  | 1        | 2.00E-04 | NA     | NA | 0.0023 | 0        |
| NM_031990    | PTBP1        | 0                 | 0.301226715129487 | 1        | 2.00E-04 | NA     | NA | 0.0023 | 0        |
| NM_002819    | PTBP1        | 0                 | 0.301226715129487 | 1        | 2.00E-04 | NA     | NA | 0.0023 | 0        |
| NM_031991    | PTBP1        | 0                 | 0.301226715129487 | 1        | 2.00E-04 | NA     | NA | 0.0023 | 0        |
| NM_024969    | CSRNP3       | 0                 | 0.301226715129487 | 1        | 2.00E-04 | NA     | NA | 0.0023 | 0        |
| NM_014586    | HUNK         | 0                 | 0.301226715129487 | 1        | 2.00E-04 | NA     | NA | 0.0023 | 0        |
| NM_001754    | RUNX1        | 0                 | 0.301226715129487 | 1        | 2.00E-04 | NA     | NA | 0.0023 | 0        |
| NR_000026    | RNU86        | 0                 | 0.301226715129487 | 1        | 2.00E-04 | NA     | NA | 0.0023 | 0        |
| NM_052883    | TXNRD3       | 0                 | 0.301226715129487 | 1        | 2.00E-04 | NA     | NA | 0.0023 | 0        |
| NM_001173513 | TXNRD3       | 0                 | 0.301226715129487 | 1        | 2.00E-04 | NA     | NA | 0.0023 | 0        |
| NM_020319    | ANKMY2       | 0                 | 0.301681054066333 | 1        | 2.00E-04 | NA     | NA | 0.0023 | 0        |
| NM_004852    | ONECUT2      | 0                 | 0.30213539300318  | 1        | 2.00E-04 | NA     | NA | 0.0023 | 0        |
| NM_004291    | CARTPT       | 0                 | 0.30213539300318  | 1        | 2.00E-04 | NA     | NA | 0.0023 | 0        |
| NM_030936    | RNF32        | 0                 | 0.30213539300318  | 1        | 2.00E-04 | NA     | NA | 0.0023 | 0        |
| NM_181514    | MRPL21       | 0                 | 0.30213539300318  | 1        | 2.00E-04 | NA     | NA | 0.0023 | 0        |
| NM_181515    | MRPL21       | 0                 | 0.30213539300318  | 1        | 2.00E-04 | NA     | NA | 0.0023 | 0        |
| NM_001193613 | TUBD1        | 0                 | 0.30213539300318  | 1        | 2.00E-04 | NA     | NA | 0.0023 | 0        |
| NM_001193612 | TUBD1        | 0                 | 0.30213539300318  | 1        | 4.00E-04 | NA     | NA | 0.0023 | 1.00E-04 |
| NM_001193611 | TUBD1        | 0                 | 0.30213539300318  | 1        | 2.00E-04 | NA     | NA | 0.0023 | 0        |
| NM_001193610 | TUBD1        | 0                 | 0.30213539300318  | 1        | 2.00E-04 | NA     | NA | 0.0023 | 0        |
| NM_001193609 | TUBD1        | 0                 | 0.30213539300318  | 1        | 2.00E-04 | NA     | NA | 0.0023 | 0        |

|              |          |                    |                   |   |          |    |    |        |   |
|--------------|----------|--------------------|-------------------|---|----------|----|----|--------|---|
| NM_016261    | TUBD1    | 0                  | 0.30213539300318  | 1 | 2.00E-04 | NA | NA | 0.0023 | 0 |
| NM_000413    | HSD17B1  | 0                  | 0.302589731940027 | 1 | 2.00E-04 | NA | NA | 0.0023 | 0 |
| NM_002581    | PAPPA    | 0                  | 0.302589731940027 | 1 | 2.00E-04 | NA | NA | 0.0023 | 0 |
| NM_014060    | MCTS1    | 0                  | 0.302589731940027 | 1 | 2.00E-04 | NA | NA | 0.0023 | 0 |
| NM_001922    | DCT      | 0                  | 0.302589731940027 | 1 | 2.00E-04 | NA | NA | 0.0023 | 0 |
| NM_001129889 | DCT      | 0                  | 0.302589731940027 | 1 | 2.00E-04 | NA | NA | 0.0023 | 0 |
| NR_104260    | PRDM15   | 0                  | 0.302589731940027 | 1 | 2.00E-04 | NA | NA | 0.0023 | 0 |
| NM_001164345 | ZBTB20   | 0.0313493866424353 | 0.333939118582463 | 1 | 2.00E-04 | NA | NA | 0.0023 | 0 |
| NM_001164344 | ZBTB20   | 0.0313493866424353 | 0.333939118582463 | 1 | 2.00E-04 | NA | NA | 0.0023 | 0 |
| NM_002194    | INPP1    | 0                  | 0.303044070876874 | 1 | 2.00E-04 | NA | NA | 0.0023 | 0 |
| NM_001128928 | INPP1    | 0                  | 0.303044070876874 | 1 | 2.00E-04 | NA | NA | 0.0023 | 0 |
| NM_006990    | WASF2    | 0                  | 0.303044070876874 | 1 | 2.00E-04 | NA | NA | 0.0023 | 0 |
| NM_001201404 | WASF2    | 0                  | 0.303044070876874 | 1 | 2.00E-04 | NA | NA | 0.0023 | 0 |
| NM_181880    | VCY1B    | 0                  | 0.303044070876874 | 1 | 2.00E-04 | NA | NA | 0.0023 | 0 |
| NM_152222    | REL1     | 0                  | 0.303498409813721 | 1 | 2.00E-04 | NA | NA | 0.0023 | 0 |
| NM_005946    | MT1A     | 0                  | 0.303498409813721 | 1 | 2.00E-04 | NA | NA | 0.0023 | 0 |
| NM_019009    | TOLLIP   | 0                  | 0.303498409813721 | 1 | 2.00E-04 | NA | NA | 0.0023 | 0 |
| NM_001042603 | KDM5A    | 0                  | 0.303498409813721 | 1 | 2.00E-04 | NA | NA | 0.0023 | 0 |
| NM_004607    | TBCA     | 0.0813266696955929 | 0.384825079509314 | 1 | 2.00E-04 | NA | NA | 0.0023 | 0 |
| NM_012243    | SLC35A3  | 0                  | 0.303952748750568 | 1 | 2.00E-04 | NA | NA | 0.0023 | 0 |
| NM_001271684 | SLC35A3  | 0                  | 0.303952748750568 | 1 | 2.00E-04 | NA | NA | 0.0023 | 0 |
| NM_024579    | C1orf54  | 0                  | 0.303952748750568 | 1 | 2.00E-04 | NA | NA | 0.0023 | 0 |
| NM_001172745 | SEC23B   | 0                  | 0.303952748750568 | 1 | 2.00E-04 | NA | NA | 0.0023 | 0 |
| NM_001195684 | TGFBR3   | 0                  | 0.303952748750568 | 1 | 2.00E-04 | NA | NA | 0.0023 | 0 |
| NR_024581    | ASB13    | 0                  | 0.303952748750568 | 1 | 2.00E-04 | NA | NA | 0.0023 | 0 |
| NR_037164    | ASB13    | 0                  | 0.303952748750568 | 1 | 2.00E-04 | NA | NA | 0.0023 | 0 |
| NM_024701    | ASB13    | 0                  | 0.303952748750568 | 1 | 2.00E-04 | NA | NA | 0.0023 | 0 |
| NM_001260497 | KCNC2    | 0                  | 0.303952748750568 | 1 | 2.00E-04 | NA | NA | 0.0023 | 0 |
| NM_001260498 | KCNC2    | 0                  | 0.303952748750568 | 1 | 2.00E-04 | NA | NA | 0.0023 | 0 |
| NM_139137    | KCNC2    | 0                  | 0.303952748750568 | 1 | 2.00E-04 | NA | NA | 0.0023 | 0 |
| NM_139136    | KCNC2    | 0                  | 0.303952748750568 | 1 | 2.00E-04 | NA | NA | 0.0023 | 0 |
| NM_153748    | KCNC2    | 0                  | 0.303952748750568 | 1 | 2.00E-04 | NA | NA | 0.0023 | 0 |
| NM_001260499 | KCNC2    | 0                  | 0.303952748750568 | 1 | 2.00E-04 | NA | NA | 0.0023 | 0 |
| NM_139159    | DPP9     | 0                  | 0.303952748750568 | 1 | 2.00E-04 | NA | NA | 0.0023 | 0 |
| NR_033980    | FLJ16341 | 0                  | 0.303952748750568 | 1 | 2.00E-04 | NA | NA | 0.0023 | 0 |
| NM_153346    | BEND2    | 0                  | 0.303952748750568 | 1 | 2.00E-04 | NA | NA | 0.0023 | 0 |
| NM_001184767 | BEND2    | 0                  | 0.303952748750568 | 1 | 2.00E-04 | NA | NA | 0.0023 | 0 |
| NM_014390    | SND1     | 0.12267151294866   | 0.427078600636075 | 1 | 2.00E-04 | NA | NA | 0.0023 | 0 |
| NM_203356    | CTAGE5   | 0                  | 0.304407087687415 | 1 | 2.00E-04 | NA | NA | 0.0023 | 0 |
| NM_001247988 | CTAGE5   | 0                  | 0.304407087687415 | 1 | 2.00E-04 | NA | NA | 0.0023 | 0 |
| NM_001254    | CDC6     | 0                  | 0.304407087687415 | 1 | 2.00E-04 | NA | NA | 0.0023 | 0 |
| NM_145649    | GCNT2    | 0                  | 0.304407087687415 | 1 | 2.00E-04 | NA | NA | 0.0023 | 0 |
| NM_004053    | BYSL     | 0                  | 0.304407087687415 | 1 | 2.00E-04 | NA | NA | 0.0023 | 0 |
| NM_012074    | DPF3     | 0                  | 0.304407087687415 | 1 | 2.00E-04 | NA | NA | 0.0023 | 0 |
| NM_001280542 | DPF3     | 0                  | 0.304407087687415 | 1 | 2.00E-04 | NA | NA | 0.0023 | 0 |
| NM_001280543 | DPF3     | 0                  | 0.304407087687415 | 1 | 2.00E-04 | NA | NA | 0.0023 | 0 |
| NM_017563    | IL17RD   | 0                  | 0.304407087687415 | 1 | 2.00E-04 | NA | NA | 0.0023 | 0 |



|              |               |                     |                   |        |          |    |    |        |          |
|--------------|---------------|---------------------|-------------------|--------|----------|----|----|--------|----------|
| NM_181600    | KRTAP13-4     | 0                   | 0.304861426624262 | 0.9948 | 0.0038   | NA | NA | 0.0416 | 7.00E-04 |
| NM_206824    | VKORC1        | 0                   | 0.304861426624262 | 1      | 2.00E-04 | NA | NA | 0.0023 | 0        |
| NM_024006    | VKORC1        | 0                   | 0.304861426624262 | 1      | 2.00E-04 | NA | NA | 0.0023 | 0        |
| NM_017984    | ZCWPW1        | 0                   | 0.304861426624262 | 1      | 2.00E-04 | NA | NA | 0.0023 | 0        |
| NM_001258008 | ZCWPW1        | 0                   | 0.304861426624262 | 1      | 2.00E-04 | NA | NA | 0.0023 | 0        |
| NM_020640    | DCUN1D1       | 0                   | 0.305315765561109 | 1      | 2.00E-04 | NA | NA | 0.0023 | 0        |
| NM_001193622 | PINLYP        | 0                   | 0.305770104497955 | 1      | 2.00E-04 | NA | NA | 0.0023 | 0        |
| NM_001199535 | TGIF2-C2orf24 | 0                   | 0.305770104497955 | 1      | 2.00E-04 | NA | NA | 0.0023 | 0        |
| NM_001199515 | TGIF2         | 0                   | 0.305770104497955 | 1      | 2.00E-04 | NA | NA | 0.0023 | 0        |
| NM_152433    | KBTBD3        | 0                   | 0.305770104497955 | 1      | 2.00E-04 | NA | NA | 0.0023 | 0        |
| NM_198439    | KBTBD3        | 0                   | 0.305770104497955 | 1      | 2.00E-04 | NA | NA | 0.0023 | 0        |
| NM_032603    | LOXL3         | 0                   | 0.305770104497955 | 1      | 2.00E-04 | NA | NA | 0.0023 | 0        |
| NM_006811    | SERINC3       | 0                   | 0.305770104497955 | 1      | 2.00E-04 | NA | NA | 0.0023 | 0        |
| NM_198941    | SERINC3       | 0                   | 0.305770104497955 | 1      | 2.00E-04 | NA | NA | 0.0023 | 0        |
| NM_001270623 | SLC16A7       | 0                   | 0.306224443434802 | 1      | 2.00E-04 | NA | NA | 0.0023 | 0        |
| NM_001270622 | SLC16A7       | 0                   | 0.306224443434802 | 1      | 2.00E-04 | NA | NA | 0.0023 | 0        |
| NM_080865    | GPR62         | 0                   | 0.306224443434802 | 1      | 2.00E-04 | NA | NA | 0.0023 | 0        |
| NR_040250    | WWTR1-AS1     | 0                   | 0.306224443434802 | 1      | 2.00E-04 | NA | NA | 0.0023 | 0        |
| NM_001143997 | OGDHL         | 0                   | 0.306224443434802 | 1      | 2.00E-04 | NA | NA | 0.0023 | 0        |
| NM_001143996 | OGDHL         | 0                   | 0.306224443434802 | 1      | 2.00E-04 | NA | NA | 0.0023 | 0        |
| NM_018245    | OGDHL         | 0                   | 0.306224443434802 | 1      | 2.00E-04 | NA | NA | 0.0023 | 0        |
| NM_006045    | ATP9A         | 0                   | 0.306224443434802 | 1      | 2.00E-04 | NA | NA | 0.0023 | 0        |
| NM_001037277 | GGPS1         | 0                   | 0.306678782371649 | 1      | 6.00E-04 | NA | NA | 0.0099 | 1.00E-04 |
| NR_073180    | LIPE-AS1      | 0                   | 0.306678782371649 | 1      | 2.00E-04 | NA | NA | 0.0023 | 0        |
| NM_003965    | CCRL2         | 0                   | 0.306678782371649 | 1      | 2.00E-04 | NA | NA | 0.0023 | 0        |
| NM_001130910 | CCRL2         | 0                   | 0.306678782371649 | 1      | 2.00E-04 | NA | NA | 0.0023 | 0        |
| NM_001282538 | GNB1          | 0                   | 0.306678782371649 | 1      | 2.00E-04 | NA | NA | 0.0023 | 0        |
| NM_001282539 | GNB1          | 0                   | 0.306678782371649 | 1      | 4.00E-04 | NA | NA | 0.0023 | 1.00E-04 |
| NM_002074    | GNB1          | 0                   | 0.306678782371649 | 1      | 2.00E-04 | NA | NA | 0.0023 | 0        |
| NM_001257389 | CD63          | 0                   | 0.306678782371649 | 1      | 2.00E-04 | NA | NA | 0.0023 | 0        |
| NM_170784    | MKKS          | 0                   | 0.306678782371649 | 1      | 4.00E-04 | NA | NA | 0.0023 | 1.00E-04 |
| NR_072977    | MKKS          | 0                   | 0.306678782371649 | 1      | 2.00E-04 | NA | NA | 0.0023 | 0        |
| NM_031891    | CDH20         | 0                   | 0.307133121308496 | 1      | 2.00E-04 | NA | NA | 0.0023 | 0        |
| NM_033053    | DMRTC1        | 0                   | 0.307133121308496 | 1      | 2.00E-04 | NA | NA | 0.0023 | 0        |
| NM_001080851 | DMRTC1B       | 0                   | 0.307133121308496 | 1      | 2.00E-04 | NA | NA | 0.0023 | 0        |
| NR_029435    | FLJ31306      | 0                   | 0.307133121308496 | 1      | 2.00E-04 | NA | NA | 0.0023 | 0        |
| NR_029434    | FLJ31306      | 0                   | 0.307133121308496 | 1      | 2.00E-04 | NA | NA | 0.0023 | 0        |
| NM_203400    | RPRML         | 0                   | 0.307133121308496 | 0.9998 | 2.00E-04 | NA | NA | 0.0023 | 0        |
| NM_001915    | CYB561        | 0                   | 0.307133121308496 | 1      | 4.00E-04 | NA | NA | 0.0023 | 1.00E-04 |
| NM_001017916 | CYB561        | 0                   | 0.307133121308496 | 1      | 2.00E-04 | NA | NA | 0.0023 | 0        |
| NR_038459    | GFOD1         | 0                   | 0.307133121308496 | 1      | 2.00E-04 | NA | NA | 0.0023 | 0        |
| NM_006080    | SEMA3A        | 0                   | 0.307133121308496 | 1      | 2.00E-04 | NA | NA | 0.0023 | 0        |
| NM_206866    | BACH1         | 0.00272603362108133 | 0.310313493866424 | 1      | 2.00E-04 | NA | NA | 0.0023 | 0        |
| NM_018656    | SLC35E3       | 0                   | 0.307587460245343 | 1      | 6.00E-04 | NA | NA | 0.0099 | 1.00E-04 |
| NM_015559    | SETBP1        | 0                   | 0.307587460245343 | 1      | 2.00E-04 | NA | NA | 0.0023 | 0        |
| NM_001001548 | CD36          | 0                   | 0.307587460245343 | 1      | 2.00E-04 | NA | NA | 0.0023 | 0        |
| NM_000072    | CD36          | 0                   | 0.307587460245343 | 1      | 2.00E-04 | NA | NA | 0.0023 | 0        |

|              |           |                    |                   |   |          |    |    |        |   |
|--------------|-----------|--------------------|-------------------|---|----------|----|----|--------|---|
| NM_177404    | MAGEB1    | 0                  | 0.307587460245343 | 1 | 2.00E-04 | NA | NA | 0.0023 | 0 |
| NR_033256    | XAGE1D    | 0                  | 0.307587460245343 | 1 | 2.00E-04 | NA | NA | 0.0023 | 0 |
| NR_033254    | XAGE1B    | 0                  | 0.307587460245343 | 1 | 2.00E-04 | NA | NA | 0.0023 | 0 |
| NR_033253    | XAGE1A    | 0                  | 0.307587460245343 | 1 | 2.00E-04 | NA | NA | 0.0023 | 0 |
| NR_033251    | XAGE1C    | 0                  | 0.307587460245343 | 1 | 2.00E-04 | NA | NA | 0.0023 | 0 |
| NR_033257    | XAGE1E    | 0                  | 0.307587460245343 | 1 | 2.00E-04 | NA | NA | 0.0023 | 0 |
| NM_012249    | RHOQ      | 0                  | 0.30804179918219  | 1 | 2.00E-04 | NA | NA | 0.0023 | 0 |
| NR_029609    | MIR10B    | 0                  | 0.30804179918219  | 1 | 2.00E-04 | NA | NA | 0.0023 | 0 |
| NM_001006610 | SIAH1     | 0                  | 0.30804179918219  | 1 | 2.00E-04 | NA | NA | 0.0023 | 0 |
| NM_199282    | ARHGAP27  | 0                  | 0.30804179918219  | 1 | 2.00E-04 | NA | NA | 0.0023 | 0 |
| NM_024303    | ZSCAN5A   | 0                  | 0.30804179918219  | 1 | 2.00E-04 | NA | NA | 0.0023 | 0 |
| NM_001282185 | ETF1      | 0                  | 0.30804179918219  | 1 | 2.00E-04 | NA | NA | 0.0023 | 0 |
| NM_001042498 | SLC35A2   | 0                  | 0.30804179918219  | 1 | 2.00E-04 | NA | NA | 0.0023 | 0 |
| NM_001282647 | SLC35A2   | 0                  | 0.30804179918219  | 1 | 2.00E-04 | NA | NA | 0.0023 | 0 |
| NM_005660    | SLC35A2   | 0                  | 0.30804179918219  | 1 | 2.00E-04 | NA | NA | 0.0023 | 0 |
| NM_001032289 | SLC35A2   | 0                  | 0.30804179918219  | 1 | 2.00E-04 | NA | NA | 0.0023 | 0 |
| NM_001282648 | SLC35A2   | 0                  | 0.30804179918219  | 1 | 2.00E-04 | NA | NA | 0.0023 | 0 |
| NM_001282649 | SLC35A2   | 0                  | 0.30804179918219  | 1 | 2.00E-04 | NA | NA | 0.0023 | 0 |
| NM_001282650 | SLC35A2   | 0                  | 0.30804179918219  | 1 | 2.00E-04 | NA | NA | 0.0023 | 0 |
| NM_001282651 | SLC35A2   | 0                  | 0.30804179918219  | 1 | 2.00E-04 | NA | NA | 0.0023 | 0 |
| NM_138999    | NETO1     | 0.0772376192639709 | 0.385279418446161 | 1 | 2.00E-04 | NA | NA | 0.0023 | 0 |
| NM_003564    | TAGLN2    | 0.167651067696502  | 0.476147205815538 | 1 | 2.00E-04 | NA | NA | 0.0023 | 0 |
| NM_172353    | CD46      | 0                  | 0.308496138119037 | 1 | 2.00E-04 | NA | NA | 0.0023 | 0 |
| NM_172351    | CD46      | 0                  | 0.308496138119037 | 1 | 2.00E-04 | NA | NA | 0.0023 | 0 |
| NM_172350    | CD46      | 0                  | 0.308496138119037 | 1 | 2.00E-04 | NA | NA | 0.0023 | 0 |
| NM_172361    | CD46      | 0                  | 0.308496138119037 | 1 | 2.00E-04 | NA | NA | 0.0023 | 0 |
| NM_002389    | CD46      | 0                  | 0.308496138119037 | 1 | 2.00E-04 | NA | NA | 0.0023 | 0 |
| NM_172352    | CD46      | 0                  | 0.308496138119037 | 1 | 2.00E-04 | NA | NA | 0.0023 | 0 |
| NM_153826    | CD46      | 0                  | 0.308496138119037 | 1 | 2.00E-04 | NA | NA | 0.0023 | 0 |
| NM_172359    | CD46      | 0                  | 0.308496138119037 | 1 | 2.00E-04 | NA | NA | 0.0023 | 0 |
| NM_001242903 | AKAP1     | 0                  | 0.308496138119037 | 1 | 2.00E-04 | NA | NA | 0.0023 | 0 |
| NM_001242902 | AKAP1     | 0                  | 0.308496138119037 | 1 | 2.00E-04 | NA | NA | 0.0023 | 0 |
| NM_020854    | KIAA1468  | 0                  | 0.308496138119037 | 1 | 2.00E-04 | NA | NA | 0.0023 | 0 |
| NM_001040022 | SIRPA     | 0                  | 0.308496138119037 | 1 | 2.00E-04 | NA | NA | 0.0023 | 0 |
| NM_001962    | EFNA5     | 0                  | 0.308496138119037 | 1 | 2.00E-04 | NA | NA | 0.0023 | 0 |
| NM_182493    | MYLK3     | 0                  | 0.308950477055884 | 1 | 2.00E-04 | NA | NA | 0.0023 | 0 |
| NR_028074    | RAB2B     | 0.139482053611995  | 0.448886869604725 | 1 | 2.00E-04 | NA | NA | 0.0023 | 0 |
| NM_032846    | RAB2B     | 0.139482053611995  | 0.448886869604725 | 1 | 2.00E-04 | NA | NA | 0.0023 | 0 |
| NM_001172665 | RAB40C    | 0                  | 0.309404815992731 | 1 | 2.00E-04 | NA | NA | 0.0023 | 0 |
| NM_001172663 | RAB40C    | 0                  | 0.309404815992731 | 1 | 2.00E-04 | NA | NA | 0.0023 | 0 |
| NM_001172666 | RAB40C    | 0                  | 0.309404815992731 | 1 | 2.00E-04 | NA | NA | 0.0023 | 0 |
| NM_021168    | RAB40C    | 0                  | 0.309404815992731 | 1 | 2.00E-04 | NA | NA | 0.0023 | 0 |
| NM_001172664 | RAB40C    | 0                  | 0.309404815992731 | 1 | 2.00E-04 | NA | NA | 0.0023 | 0 |
| NR_037888    | STX18-AS1 | 0                  | 0.309404815992731 | 1 | 2.00E-04 | NA | NA | 0.0023 | 0 |
| NM_031207    | HYI       | 0                  | 0.309404815992731 | 1 | 2.00E-04 | NA | NA | 0.0023 | 0 |
| NM_001190880 | HYI       | 0                  | 0.309404815992731 | 1 | 2.00E-04 | NA | NA | 0.0023 | 0 |
| NM_001243526 | HYI       | 0                  | 0.309404815992731 | 1 | 2.00E-04 | NA | NA | 0.0023 | 0 |

|              |              |                     |                   |   |          |    |    |        |       |
|--------------|--------------|---------------------|-------------------|---|----------|----|----|--------|-------|
| NR_027622    | LOC100128164 | 0                   | 0.309404815992731 | 1 | 2.00E-04 | NA | NA | 0.0023 | 0     |
| NR_024409    | LOC100128164 | 0                   | 0.309404815992731 | 1 | 2.00E-04 | NA | NA | 0.0023 | 0     |
| NM_181354    | OXR1         | 0                   | 0.309859154929577 | 1 | 2.00E-04 | NA | NA | 0.0023 | 0     |
| NM_006459    | ERLIN1       | 0                   | 0.309859154929577 | 1 | 2.00E-04 | NA | NA | 0.0023 | 0     |
| NM_001100626 | ERLIN1       | 0                   | 0.309859154929577 | 1 | 2.00E-04 | NA | NA | 0.0023 | 0     |
| NM_138961    | ESAM         | 0                   | 0.309859154929577 | 1 | 2.00E-04 | NA | NA | 0.0023 | 0     |
| NM_005315    | GSC2         | 0                   | 0.309859154929577 | 1 | 2.00E-04 | NA | NA | 0.0023 | 0     |
| NM_016453    | NCKIPSD      | 0                   | 0.309859154929577 | 1 | 2.00E-04 | NA | NA | 0.0023 | 0     |
| NM_184231    | NCKIPSD      | 0                   | 0.309859154929577 | 1 | 2.00E-04 | NA | NA | 0.0023 | 0     |
| NM_003648    | DGKD         | 0.0967741935483871  | 0.407087687414811 | 1 | 2.00E-04 | NA | NA | 0.0023 | 0     |
| NM_001136138 | RPS6KC1      | 0                   | 0.310313493866424 | 1 | 2.00E-04 | NA | NA | 0.0023 | 0     |
| NM_012424    | RPS6KC1      | 0                   | 0.310313493866424 | 1 | 2.00E-04 | NA | NA | 0.0023 | 0     |
| NM_138994    | CNTNAP4      | 0                   | 0.310313493866424 | 1 | 2.00E-04 | NA | NA | 0.0023 | 0     |
| NM_001111307 | PDE4A        | 0                   | 0.310313493866424 | 1 | 0.0058   | NA | NA | 0.0458 | 0.001 |
| NM_003192    | TBCC         | 0                   | 0.310313493866424 | 1 | 2.00E-04 | NA | NA | 0.0023 | 0     |
| NM_005642    | TAF7         | 0                   | 0.310767832803271 | 1 | 2.00E-04 | NA | NA | 0.0023 | 0     |
| NM_002269    | KPNA5        | 0                   | 0.311222171740118 | 1 | 2.00E-04 | NA | NA | 0.0023 | 0     |
| NM_003007    | SEMG1        | 0.00863243980009087 | 0.319854611540209 | 1 | 2.00E-04 | NA | NA | 0.0023 | 0     |
| NM_012342    | BAMBI        | 0                   | 0.311676510676965 | 1 | 2.00E-04 | NA | NA | 0.0023 | 0     |
| NM_006782    | ZFPL1        | 0                   | 0.311676510676965 | 1 | 2.00E-04 | NA | NA | 0.0023 | 0     |
| NM_003658    | BARX2        | 0                   | 0.311676510676965 | 1 | 2.00E-04 | NA | NA | 0.0023 | 0     |
| NM_002448    | MSX1         | 0                   | 0.311676510676965 | 1 | 2.00E-04 | NA | NA | 0.0023 | 0     |
| NR_024420    | LINC00937    | 0                   | 0.311676510676965 | 1 | 2.00E-04 | NA | NA | 0.0023 | 0     |
| NM_001281534 | EPB41L3      | 0                   | 0.311676510676965 | 1 | 2.00E-04 | NA | NA | 0.0023 | 0     |
| NM_012307    | EPB41L3      | 0                   | 0.311676510676965 | 1 | 2.00E-04 | NA | NA | 0.0023 | 0     |
| NM_001282099 | YAP1         | 0                   | 0.312130849613812 | 1 | 2.00E-04 | NA | NA | 0.0023 | 0     |
| NM_001195044 | YAP1         | 0                   | 0.312130849613812 | 1 | 2.00E-04 | NA | NA | 0.0023 | 0     |
| NM_001130145 | YAP1         | 0                   | 0.312130849613812 | 1 | 2.00E-04 | NA | NA | 0.0023 | 0     |
| NM_006106    | YAP1         | 0                   | 0.312130849613812 | 1 | 2.00E-04 | NA | NA | 0.0023 | 0     |
| NM_001282100 | YAP1         | 0                   | 0.312130849613812 | 1 | 2.00E-04 | NA | NA | 0.0023 | 0     |
| NM_001282098 | YAP1         | 0                   | 0.312130849613812 | 1 | 2.00E-04 | NA | NA | 0.0023 | 0     |
| NM_001282097 | YAP1         | 0                   | 0.312130849613812 | 1 | 2.00E-04 | NA | NA | 0.0023 | 0     |
| NM_001282101 | YAP1         | 0                   | 0.312130849613812 | 1 | 2.00E-04 | NA | NA | 0.0023 | 0     |
| NM_002422    | MMP3         | 0                   | 0.312130849613812 | 1 | 2.00E-04 | NA | NA | 0.0023 | 0     |
| NR_027073    | LOC283731    | 0                   | 0.312130849613812 | 1 | 2.00E-04 | NA | NA | 0.0023 | 0     |
| NM_001256185 | SNX12        | 0.0318037255792821  | 0.344388914129941 | 1 | 2.00E-04 | NA | NA | 0.0023 | 0     |
| NM_183233    | SLC22A18     | 0                   | 0.312585188550659 | 1 | 2.00E-04 | NA | NA | 0.0023 | 0     |
| NR_015415    | DICER1-AS1   | 0                   | 0.312585188550659 | 1 | 2.00E-04 | NA | NA | 0.0023 | 0     |
| NR_036170    | MIR3199-2    | 0                   | 0.312585188550659 | 1 | 2.00E-04 | NA | NA | 0.0023 | 0     |
| NM_001032384 | PQBP1        | 0                   | 0.312585188550659 | 1 | 2.00E-04 | NA | NA | 0.0023 | 0     |
| NM_005710    | PQBP1        | 0                   | 0.312585188550659 | 1 | 2.00E-04 | NA | NA | 0.0023 | 0     |
| NM_001167992 | PQBP1        | 0                   | 0.312585188550659 | 1 | 2.00E-04 | NA | NA | 0.0023 | 0     |
| NM_007051    | FAF1         | 0                   | 0.312585188550659 | 1 | 2.00E-04 | NA | NA | 0.0023 | 0     |
| NM_024014    | HOXA6        | 0                   | 0.312585188550659 | 1 | 2.00E-04 | NA | NA | 0.0023 | 0     |
| NM_004466    | GPC5         | 0                   | 0.313039527487506 | 1 | 2.00E-04 | NA | NA | 0.0023 | 0     |
| NM_014812    | CEP170       | 0                   | 0.313039527487506 | 1 | 2.00E-04 | NA | NA | 0.0023 | 0     |
| NM_001042405 | CEP170       | 0                   | 0.313039527487506 | 1 | 2.00E-04 | NA | NA | 0.0023 | 0     |

|              |           |                     |                   |        |          |    |    |        |          |
|--------------|-----------|---------------------|-------------------|--------|----------|----|----|--------|----------|
| NM_001042404 | CEP170    | 0                   | 0.313039527487506 | 1      | 2.00E-04 | NA | NA | 0.0023 | 0        |
| NM_001012300 | MCRS1     | 0                   | 0.313039527487506 | 1      | 0.0122   | NA | NA | 0.0999 | 0.0021   |
| NM_024524    | ATP13A3   | 0                   | 0.313039527487506 | 1      | 2.00E-04 | NA | NA | 0.0023 | 0        |
| NM_032593    | HINT2     | 0                   | 0.313039527487506 | 1      | 2.00E-04 | NA | NA | 0.0023 | 0        |
| NM_015448    | DPCD      | 0                   | 0.313493866424353 | 1      | 2.00E-04 | NA | NA | 0.0023 | 0        |
| NM_021955    | GNGT1     | 0                   | 0.313493866424353 | 1      | 6.00E-04 | NA | NA | 0.0099 | 1.00E-04 |
| NM_001164373 | GPN3      | 0                   | 0.313493866424353 | 1      | 2.00E-04 | NA | NA | 0.0023 | 0        |
| NM_016301    | GPN3      | 0                   | 0.313493866424353 | 1      | 2.00E-04 | NA | NA | 0.0023 | 0        |
| NM_152446    | CEP128    | 0                   | 0.313493866424353 | 1      | 2.00E-04 | NA | NA | 0.0023 | 0        |
| NM_000132    | F8        | 0                   | 0.313493866424353 | 1      | 2.00E-04 | NA | NA | 0.0023 | 0        |
| NR_024241    | FAM86DP   | 0.00408905043162199 | 0.318037255792821 | 1      | 2.00E-04 | NA | NA | 0.0023 | 0        |
| NM_001012    | RPS8      | 0                   | 0.313948205361199 | 1      | 2.00E-04 | NA | NA | 0.0023 | 0        |
| NR_000024    | SNORD46   | 0                   | 0.313948205361199 | 1      | 2.00E-04 | NA | NA | 0.0023 | 0        |
| NR_000015    | SNORD55   | 0                   | 0.313948205361199 | 1      | 2.00E-04 | NA | NA | 0.0023 | 0        |
| NM_153713    | LIX1L     | 0                   | 0.313948205361199 | 1      | 2.00E-04 | NA | NA | 0.0023 | 0        |
| NM_001102592 | HENMT1    | 0                   | 0.313948205361199 | 0.9994 | 0.0024   | NA | NA | 0.025  | 4.00E-04 |
| NM_001023570 | IQCB1     | 0                   | 0.313948205361199 | 1      | 2.00E-04 | NA | NA | 0.0023 | 0        |
| NM_001023571 | IQCB1     | 0                   | 0.313948205361199 | 1      | 2.00E-04 | NA | NA | 0.0023 | 0        |
| NM_021058    | HIST1H2BJ | 0                   | 0.313948205361199 | 1      | 2.00E-04 | NA | NA | 0.0023 | 0        |
| NM_001039580 | MAP9      | 0.118582462517038   | 0.432530667878237 | 1      | 2.00E-04 | NA | NA | 0.0023 | 0        |
| NM_001165136 | HERC6     | 0.0676965015901863  | 0.381644706951386 | 1      | 2.00E-04 | NA | NA | 0.0023 | 0        |
| NM_017912    | HERC6     | 0.0676965015901863  | 0.381644706951386 | 1      | 2.00E-04 | NA | NA | 0.0023 | 0        |
| NM_002425    | MMP10     | 0                   | 0.314402544298046 | 1      | 2.00E-04 | NA | NA | 0.0023 | 0        |
| NM_000633    | BCL2      | 0                   | 0.314402544298046 | 1      | 2.00E-04 | NA | NA | 0.0023 | 0        |
| NM_000657    | BCL2      | 0                   | 0.314402544298046 | 1      | 2.00E-04 | NA | NA | 0.0023 | 0        |
| NM_015399    | BRMS1     | 0                   | 0.314856883234893 | 1      | 2.00E-04 | NA | NA | 0.0023 | 0        |
| NM_001024957 | BRMS1     | 0                   | 0.314856883234893 | 1      | 2.00E-04 | NA | NA | 0.0023 | 0        |
| NM_199050    | C2CD2     | 0                   | 0.314856883234893 | 1      | 2.00E-04 | NA | NA | 0.0023 | 0        |
| NM_007332    | TRPA1     | 0                   | 0.314856883234893 | 1      | 2.00E-04 | NA | NA | 0.0023 | 0        |
| NM_007234    | DCTN3     | 0                   | 0.314856883234893 | 1      | 2.00E-04 | NA | NA | 0.0023 | 0        |
| NM_024348    | DCTN3     | 0                   | 0.314856883234893 | 1      | 2.00E-04 | NA | NA | 0.0023 | 0        |
| NM_001281425 | DCTN3     | 0                   | 0.314856883234893 | 1      | 2.00E-04 | NA | NA | 0.0023 | 0        |
| NM_001281427 | DCTN3     | 0                   | 0.314856883234893 | 1      | 2.00E-04 | NA | NA | 0.0023 | 0        |
| NM_001281426 | DCTN3     | 0                   | 0.314856883234893 | 1      | 2.00E-04 | NA | NA | 0.0023 | 0        |
| NM_014313    | TMEM50A   | 0                   | 0.31531122217174  | 1      | 2.00E-04 | NA | NA | 0.0023 | 0        |
| NM_012474    | UCK2      | 0                   | 0.31531122217174  | 1      | 2.00E-04 | NA | NA | 0.0023 | 0        |
| NM_001009909 | LUZP2     | 0                   | 0.31531122217174  | 1      | 2.00E-04 | NA | NA | 0.0023 | 0        |
| NM_001252010 | LUZP2     | 0                   | 0.31531122217174  | 1      | 2.00E-04 | NA | NA | 0.0023 | 0        |
| NM_001252008 | LUZP2     | 0                   | 0.31531122217174  | 1      | 2.00E-04 | NA | NA | 0.0023 | 0        |
| NM_001170791 | RMDN2     | 0                   | 0.31531122217174  | 1      | 2.00E-04 | NA | NA | 0.0023 | 0        |
| NM_012259    | HEY2      | 0                   | 0.31531122217174  | 1      | 2.00E-04 | NA | NA | 0.0023 | 0        |
| NM_053067    | UBQLN1    | 0                   | 0.31531122217174  | 1      | 2.00E-04 | NA | NA | 0.0023 | 0        |
| NM_013438    | UBQLN1    | 0                   | 0.31531122217174  | 1      | 2.00E-04 | NA | NA | 0.0023 | 0        |
| NM_001185059 | ZCCHC6    | 0                   | 0.31531122217174  | 1      | 2.00E-04 | NA | NA | 0.0023 | 0        |
| NM_024617    | ZCCHC6    | 0                   | 0.31531122217174  | 1      | 2.00E-04 | NA | NA | 0.0023 | 0        |
| NM_001185074 | ZCCHC6    | 0                   | 0.31531122217174  | 1      | 2.00E-04 | NA | NA | 0.0023 | 0        |
| NM_174896    | C1orf162  | 0.0345297592003635  | 0.35029532030895  | 1      | 2.00E-04 | NA | NA | 0.0023 | 0        |

|              |           |                    |                   |        |          |    |    |        |          |
|--------------|-----------|--------------------|-------------------|--------|----------|----|----|--------|----------|
| NR_026895    | AP5M1     | 0                  | 0.315765561108587 | 1      | 2.00E-04 | NA | NA | 0.0023 | 0        |
| NM_018229    | AP5M1     | 0                  | 0.315765561108587 | 1      | 2.00E-04 | NA | NA | 0.0023 | 0        |
| NM_018940    | PCDHB7    | 0                  | 0.315765561108587 | 1      | 2.00E-04 | NA | NA | 0.0023 | 0        |
| NM_133179    | XAGE3     | 0                  | 0.315765561108587 | 1      | 2.00E-04 | NA | NA | 0.0023 | 0        |
| NM_174902    | LDLRAD3   | 0                  | 0.316219900045434 | 1      | 2.00E-04 | NA | NA | 0.0023 | 0        |
| NM_032871    | RELT      | 0                  | 0.316219900045434 | 1      | 2.00E-04 | NA | NA | 0.0023 | 0        |
| NM_181532    | ERAS      | 0                  | 0.316219900045434 | 1      | 2.00E-04 | NA | NA | 0.0023 | 0        |
| NM_001258415 | ARHGAP20  | 0                  | 0.316219900045434 | 1      | 2.00E-04 | NA | NA | 0.0023 | 0        |
| NM_004028    | AQP4      | 0                  | 0.316219900045434 | 1      | 2.00E-04 | NA | NA | 0.0023 | 0        |
| NM_001523    | HAS1      | 0                  | 0.316219900045434 | 1      | 2.00E-04 | NA | NA | 0.0023 | 0        |
| NR_036231    | MIR4264   | 0                  | 0.316219900045434 | 1      | 2.00E-04 | NA | NA | 0.0023 | 0        |
| NM_003924    | PHOX2B    | 0                  | 0.316219900045434 | 1      | 2.00E-04 | NA | NA | 0.0023 | 0        |
| NM_001143975 | UBTF1     | 0.0663334847796456 | 0.383007723761926 | 1      | 2.00E-04 | NA | NA | 0.0023 | 0        |
| NM_139074    | DEFB127   | 0                  | 0.316674238982281 | 1      | 2.00E-04 | NA | NA | 0.0023 | 0        |
| NM_033050    | SUCNR1    | 0                  | 0.316674238982281 | 1      | 2.00E-04 | NA | NA | 0.0023 | 0        |
| NM_001164280 | SLC37A4   | 0                  | 0.316674238982281 | 1      | 2.00E-04 | NA | NA | 0.0023 | 0        |
| NM_004934    | CDH18     | 0                  | 0.316674238982281 | 1      | 2.00E-04 | NA | NA | 0.0023 | 0        |
| NM_001167667 | CDH18     | 0                  | 0.316674238982281 | 1      | 2.00E-04 | NA | NA | 0.0023 | 0        |
| NM_016591    | GCNT4     | 0                  | 0.316674238982281 | 1      | 2.00E-04 | NA | NA | 0.0023 | 0        |
| NM_001392    | DTNA      | 0                  | 0.317128577919128 | 1      | 2.00E-04 | NA | NA | 0.0023 | 0        |
| NM_032975    | DTNA      | 0                  | 0.317128577919128 | 1      | 2.00E-04 | NA | NA | 0.0023 | 0        |
| NM_001198945 | DTNA      | 0                  | 0.317128577919128 | 1      | 2.00E-04 | NA | NA | 0.0023 | 0        |
| NM_032979    | DTNA      | 0                  | 0.317128577919128 | 1      | 2.00E-04 | NA | NA | 0.0023 | 0        |
| NM_015235    | CSTF2T    | 0                  | 0.317128577919128 | 0.9738 | 0.0292   | NA | NA | 0.2977 | 0.005    |
| NM_001199383 | RNF145    | 0.0113584734211722 | 0.328941390277147 | 1      | 2.00E-04 | NA | NA | 0.0023 | 0        |
| NM_014941    | MORC2     | 0                  | 0.317582916855975 | 1      | 2.00E-04 | NA | NA | 0.0023 | 0        |
| NM_194439    | RNF212    | 0                  | 0.317582916855975 | 1      | 2.00E-04 | NA | NA | 0.0023 | 0        |
| NM_001131034 | RNF212    | 0                  | 0.317582916855975 | 1      | 2.00E-04 | NA | NA | 0.0023 | 0        |
| NM_001193318 | RNF212    | 0                  | 0.317582916855975 | 1      | 2.00E-04 | NA | NA | 0.0023 | 0        |
| NM_015868    | KIR2DL3   | 0                  | 0.318037255792821 | 1      | 2.00E-04 | NA | NA | 0.0023 | 0        |
| NM_020311    | ACKR3     | 0                  | 0.318037255792821 | 1      | 2.00E-04 | NA | NA | 0.0023 | 0        |
| NM_001002266 | MARCH8    | 0                  | 0.318037255792821 | 1      | 2.00E-04 | NA | NA | 0.0023 | 0        |
| NM_001282866 | MARCH8    | 0                  | 0.318037255792821 | 1      | 2.00E-04 | NA | NA | 0.0023 | 0        |
| NM_001278710 | NRN1      | 0                  | 0.318037255792821 | 1      | 2.00E-04 | NA | NA | 0.0023 | 0        |
| NM_001004124 | OR4P4     | 0                  | 0.318491594729668 | 1      | 2.00E-04 | NA | NA | 0.0023 | 0        |
| NM_007341    | SH3BGR    | 0                  | 0.318491594729668 | 1      | 2.00E-04 | NA | NA | 0.0023 | 0        |
| NM_001145197 | SPATA31D4 | 0                  | 0.318491594729668 | 1      | 2.00E-04 | NA | NA | 0.0023 | 0        |
| NM_001143674 | MPC2      | 0                  | 0.318491594729668 | 1      | 2.00E-04 | NA | NA | 0.0023 | 0        |
| NM_015415    | MPC2      | 0                  | 0.318491594729668 | 1      | 2.00E-04 | NA | NA | 0.0023 | 0        |
| NR_024372    | FLJ25758  | 0                  | 0.318945933666515 | 1      | 2.00E-04 | NA | NA | 0.0023 | 0        |
| NM_000134    | FABP2     | 0                  | 0.318945933666515 | 1      | 2.00E-04 | NA | NA | 0.0023 | 0        |
| NM_000794    | DRD1      | 0                  | 0.318945933666515 | 1      | 0.003    | NA | NA | 0.0416 | 5.00E-04 |
| NR_040448    | SLC7A7    | 0                  | 0.319400272603362 | 1      | 2.00E-04 | NA | NA | 0.0023 | 0        |
| NM_001126105 | SLC7A7    | 0                  | 0.319400272603362 | 1      | 2.00E-04 | NA | NA | 0.0023 | 0        |
| NR_073072    | NRM       | 0                  | 0.319400272603362 | 1      | 2.00E-04 | NA | NA | 0.0023 | 0        |
| NM_001131066 | RFESD     | 0                  | 0.319854611540209 | 1      | 2.00E-04 | NA | NA | 0.0023 | 0        |
| NM_030919    | FAM83D    | 0                  | 0.320308950477056 | 1      | 2.00E-04 | NA | NA | 0.0023 | 0        |

|              |                     |                     |                   |   |          |    |    |        |   |
|--------------|---------------------|---------------------|-------------------|---|----------|----|----|--------|---|
| NM_001256835 | <i>QTRTD1</i>       | 0                   | 0.320308950477056 | 1 | 2.00E-04 | NA | NA | 0.0023 | 0 |
| NM_024638    | <i>QTRTD1</i>       | 0                   | 0.320308950477056 | 1 | 2.00E-04 | NA | NA | 0.0023 | 0 |
| NM_001256837 | <i>QTRTD1</i>       | 0                   | 0.320308950477056 | 1 | 2.00E-04 | NA | NA | 0.0023 | 0 |
| NM_001256836 | <i>QTRTD1</i>       | 0                   | 0.320308950477056 | 1 | 2.00E-04 | NA | NA | 0.0023 | 0 |
| NM_004174    | <i>SLC9A3</i>       | 0                   | 0.320308950477056 | 1 | 2.00E-04 | NA | NA | 0.0023 | 0 |
| NM_001284351 | <i>SLC9A3</i>       | 0                   | 0.320308950477056 | 1 | 2.00E-04 | NA | NA | 0.0023 | 0 |
| NM_181609    | <i>KRTAP19-3</i>    | 0.0740572467060427  | 0.394366197183099 | 1 | 2.00E-04 | NA | NA | 0.0023 | 0 |
| NM_001018039 | <i>SFMBT2</i>       | 0                   | 0.320763289413903 | 1 | 2.00E-04 | NA | NA | 0.0023 | 0 |
| NM_001198954 | <i>RNF103-CHMP3</i> | 0                   | 0.320763289413903 | 1 | 2.00E-04 | NA | NA | 0.0023 | 0 |
| NM_031908    | <i>C1QTNF2</i>      | 0                   | 0.320763289413903 | 1 | 2.00E-04 | NA | NA | 0.0023 | 0 |
| NM_001142307 | <i>GTF2H1</i>       | 0.00590640617900954 | 0.327124034529759 | 1 | 2.00E-04 | NA | NA | 0.0023 | 0 |
| NM_005316    | <i>GTF2H1</i>       | 0.00590640617900954 | 0.327124034529759 | 1 | 2.00E-04 | NA | NA | 0.0023 | 0 |
| NM_020971    | <i>SPTBN4</i>       | 0                   | 0.32121762835075  | 1 | 2.00E-04 | NA | NA | 0.0023 | 0 |
| NM_000726    | <i>CACNB4</i>       | 0                   | 0.32121762835075  | 1 | 2.00E-04 | NA | NA | 0.0023 | 0 |
| NM_001145798 | <i>CACNB4</i>       | 0                   | 0.32121762835075  | 1 | 2.00E-04 | NA | NA | 0.0023 | 0 |
| NR_104117    | <i>HCG14</i>        | 0                   | 0.321671967287597 | 1 | 2.00E-04 | NA | NA | 0.0023 | 0 |
| NM_030946    | <i>OR14J1</i>       | 0                   | 0.321671967287597 | 1 | 2.00E-04 | NA | NA | 0.0023 | 0 |
| NM_152416    | <i>NDUFAF6</i>      | 0                   | 0.321671967287597 | 1 | 2.00E-04 | NA | NA | 0.0023 | 0 |
| NM_032606    | <i>CAPS2</i>        | 0                   | 0.321671967287597 | 1 | 2.00E-04 | NA | NA | 0.0023 | 0 |
| NM_000713    | <i>BLVRB</i>        | 0                   | 0.321671967287597 | 1 | 2.00E-04 | NA | NA | 0.0023 | 0 |
| NR_028102    | <i>THUMPD2</i>      | 0                   | 0.321671967287597 | 1 | 2.00E-04 | NA | NA | 0.0023 | 0 |
| NM_025264    | <i>THUMPD2</i>      | 0                   | 0.321671967287597 | 1 | 2.00E-04 | NA | NA | 0.0023 | 0 |
| NM_001170693 | <i>CAGE1</i>        | 0                   | 0.321671967287597 | 1 | 2.00E-04 | NA | NA | 0.0023 | 0 |
| NM_001170692 | <i>CAGE1</i>        | 0                   | 0.321671967287597 | 1 | 2.00E-04 | NA | NA | 0.0023 | 0 |
| NM_205864    | <i>CAGE1</i>        | 0                   | 0.321671967287597 | 1 | 2.00E-04 | NA | NA | 0.0023 | 0 |
| NM_001769    | <i>CD9</i>          | 0                   | 0.322126306224443 | 1 | 2.00E-04 | NA | NA | 0.0023 | 0 |
| NM_018146    | <i>RNMTL1</i>       | 0                   | 0.322126306224443 | 1 | 2.00E-04 | NA | NA | 0.0023 | 0 |
| NM_001143775 | <i>CTDNBP1</i>      | 0                   | 0.322126306224443 | 1 | 2.00E-04 | NA | NA | 0.0023 | 0 |
| NM_015491    | <i>PNISR</i>        | 0                   | 0.322126306224443 | 1 | 2.00E-04 | NA | NA | 0.0023 | 0 |
| NM_032870    | <i>PNISR</i>        | 0                   | 0.322126306224443 | 1 | 2.00E-04 | NA | NA | 0.0023 | 0 |
| NM_001256054 | <i>C9orf72</i>      | 0                   | 0.322126306224443 | 1 | 2.00E-04 | NA | NA | 0.0023 | 0 |
| NM_145005    | <i>C9orf72</i>      | 0                   | 0.322126306224443 | 1 | 2.00E-04 | NA | NA | 0.0023 | 0 |
| NM_015115    | <i>DCUN1D4</i>      | 0                   | 0.32258064516129  | 1 | 2.00E-04 | NA | NA | 0.0023 | 0 |
| NM_001040402 | <i>DCUN1D4</i>      | 0                   | 0.32258064516129  | 1 | 2.00E-04 | NA | NA | 0.0023 | 0 |
| NM_025179    | <i>PLXNA2</i>       | 0                   | 0.32258064516129  | 1 | 2.00E-04 | NA | NA | 0.0023 | 0 |
| NM_018400    | <i>SCN3B</i>        | 0                   | 0.32258064516129  | 1 | 2.00E-04 | NA | NA | 0.0023 | 0 |
| NM_001040151 | <i>SCN3B</i>        | 0                   | 0.32258064516129  | 1 | 2.00E-04 | NA | NA | 0.0023 | 0 |
| NM_016358    | <i>IRX4</i>         | 0                   | 0.32258064516129  | 1 | 2.00E-04 | NA | NA | 0.0023 | 0 |
| NM_001281300 | <i>AGAP3</i>        | 0                   | 0.323034984098137 | 1 | 2.00E-04 | NA | NA | 0.0023 | 0 |
| NM_031946    | <i>AGAP3</i>        | 0                   | 0.323034984098137 | 1 | 2.00E-04 | NA | NA | 0.0023 | 0 |
| NM_001042535 | <i>AGAP3</i>        | 0                   | 0.323034984098137 | 1 | 2.00E-04 | NA | NA | 0.0023 | 0 |
| NM_001145678 | <i>KIAA0825</i>     | 0                   | 0.323034984098137 | 1 | 2.00E-04 | NA | NA | 0.0023 | 0 |
| NM_173665    | <i>KIAA0825</i>     | 0                   | 0.323034984098137 | 1 | 2.00E-04 | NA | NA | 0.0023 | 0 |
| NM_001031689 | <i>PLAA</i>         | 0                   | 0.323034984098137 | 1 | 2.00E-04 | NA | NA | 0.0023 | 0 |
| NM_003253    | <i>TIAM1</i>        | 0.0917764652430713  | 0.414811449341209 | 1 | 2.00E-04 | NA | NA | 0.0023 | 0 |
| NM_017902    | <i>HIF1AN</i>       | 0                   | 0.323489323034984 | 1 | 2.00E-04 | NA | NA | 0.0023 | 0 |
| NM_024308    | <i>DHRS11</i>       | 0                   | 0.323489323034984 | 1 | 2.00E-04 | NA | NA | 0.0023 | 0 |

|              |             |                    |                   |       |          |    |        |        |          |
|--------------|-------------|--------------------|-------------------|-------|----------|----|--------|--------|----------|
| NM_001166301 | DHX40       | 0                  | 0.323489323034984 | 1     | 2.00E-04 | NA | NA     | 0.0023 | 0        |
| NM_024612    | DHX40       | 0                  | 0.323489323034984 | 1     | 2.00E-04 | NA | NA     | 0.0023 | 0        |
| NM_000857    | GUCY1B3     | 0                  | 0.323489323034984 | 1     | 2.00E-04 | NA | NA     | 0.0023 | 0        |
| NM_020998    | MST1        | 0                  | 0.323489323034984 | 1     | 2.00E-04 | NA | NA     | 0.0023 | 0        |
| NM_006023    | CDC123      | 0                  | 0.323943661971831 | 1     | 2.00E-04 | NA | NA     | 0.0023 | 0        |
| NM_182626    | C2orf48     | 0                  | 0.323943661971831 | 1     | 2.00E-04 | NA | NA     | 0.0023 | 0        |
| NM_001042747 | FGF         | 0                  | 0.323943661971831 | 1     | 2.00E-04 | NA | NA     | 0.0023 | 0        |
| NM_001099431 | CLEC1B      | 0                  | 0.323943661971831 | 1     | 2.00E-04 | NA | NA     | 0.0023 | 0        |
| NM_016509    | CLEC1B      | 0                  | 0.323943661971831 | 1     | 2.00E-04 | NA | NA     | 0.0023 | 0        |
| NM_014930    | ZNF510      | 0                  | 0.323943661971831 | 1     | 2.00E-04 | NA | NA     | 0.0023 | 0        |
| NR_038973    | FAM170B-AS1 | 0                  | 0.324398000908678 | 1     | 2.00E-04 | NA | NA     | 0.0023 | 0        |
| NM_020732    | ARID1B      | 0                  | 0.324398000908678 | 1     | 2.00E-04 | NA | NA     | 0.0023 | 0        |
| NM_017519    | ARID1B      | 0                  | 0.324398000908678 | 1     | 2.00E-04 | NA | NA     | 0.0023 | 0        |
| NM_001170574 | FAM46D      | 0                  | 0.324398000908678 | 1     | 2.00E-04 | NA | NA     | 0.0023 | 0        |
| NR_046160    | C12orf79    | 0                  | 0.324398000908678 | 1     | 2.00E-04 | NA | NA     | 0.0023 | 0        |
| NM_001256374 | C12orf79    | 0                  | 0.324398000908678 | 1     | 2.00E-04 | NA | NA     | 0.0023 | 0        |
| NM_001256375 | C12orf79    | 0                  | 0.324398000908678 | 1     | 2.00E-04 | NA | NA     | 0.0023 | 0        |
| NM_001256373 | C12orf79    | 0                  | 0.324398000908678 | 1     | 2.00E-04 | NA | NA     | 0.0023 | 0        |
| NM_199337    | TMEM179B    | 0                  | 0.324852339845525 | 1     | 0.002    | NA | NA     | 0.025  | 4.00E-04 |
| NM_003092    | SNRPB2      | 0                  | 0.324852339845525 | 1     | 2.00E-04 | NA | NA     | 0.0023 | 0        |
| NM_198220    | SNRPB2      | 0                  | 0.324852339845525 | 1     | 2.00E-04 | NA | NA     | 0.0023 | 0        |
| NM_001142434 | MGEA5       | 0                  | 0.324852339845525 | 1     | 2.00E-04 | NA | NA     | 0.0023 | 0        |
| NM_012215    | MGEA5       | 0                  | 0.324852339845525 | 1     | 2.00E-04 | NA | NA     | 0.0023 | 0        |
| NM_001568    | EIF3E       | 0                  | 0.324852339845525 | 1     | 2.00E-04 | NA | NA     | 0.0023 | 0        |
| NM_004422    | DVL2        | 0.0272603362108133 | 0.352567014993185 | 1     | 2.00E-04 | NA | NA     | 0.0023 | 0        |
| NM_000754    | COMT        | 0                  | 0.325306678782372 | 1     | 2.00E-04 | NA | NA     | 0.0023 | 0        |
| NM_000948    | PRL         | 0                  | 0.325306678782372 | 1     | 2.00E-04 | NA | NA     | 0.0023 | 0        |
| NM_025004    | CCDC15      | 0                  | 0.325761017719219 | 1     | 2.00E-04 | NA | NA     | 0.0023 | 0        |
| NM_007200    | AKAP13      | 0                  | 0.325761017719219 | 1     | 2.00E-04 | NA | NA     | 0.0023 | 0        |
| NM_006738    | AKAP13      | 0                  | 0.325761017719219 | 1     | 2.00E-04 | NA | NA     | 0.0023 | 0        |
| NM_032338    | LLPH        | 0                  | 0.325761017719219 | 1     | 2.00E-04 | NA | NA     | 0.0023 | 0        |
| NM_001261437 | ETV4        | 0                  | 0.325761017719219 | 1     | 2.00E-04 | NA | NA     | 0.0023 | 0        |
| NM_001079675 | ETV4        | 0                  | 0.325761017719219 | 1     | 2.00E-04 | NA | NA     | 0.0023 | 0        |
| NM_019024    | HEATR5B     | 0                  | 0.325761017719219 | 1     | 2.00E-04 | NA | NA     | 0.0023 | 0        |
| NR_030633    | MIR937      | 0                  | 0.325761017719219 | 1     | 2.00E-04 | NA | NA     | 0.0023 | 0        |
| NM_020685    | C3orf14     | 0                  | 0.326215356656065 | 1     | 2.00E-04 | NA | NA     | 0.0023 | 0        |
| NM_000778    | CYP4A11     | 0                  | 0.326215356656065 | 1     | 2.00E-04 | NA | NA     | 0.0023 | 0        |
| NM_001256165 | TMCO1       | 0                  | 0.326215356656065 | 1     | 2.00E-04 | NA | NA     | 0.0023 | 0        |
| NM_001256164 | TMCO1       | 0                  | 0.326215356656065 | 1     | 2.00E-04 | NA | NA     | 0.0023 | 0        |
| NM_019026    | TMCO1       | 0                  | 0.326215356656065 | 1     | 2.00E-04 | NA | NA     | 0.0023 | 0        |
| NR_045818    | TMCO1       | 0                  | 0.326215356656065 | 1     | 2.00E-04 | NA | NA     | 0.0023 | 0        |
| NM_018976    | SLC38A2     | 0                  | 0.326215356656065 | 1     | 2.00E-04 | NA | NA     | 0.0023 | 0        |
| NM_015343    | CTDNEP1     | 0                  | 0.326215356656065 | 1     | 2.00E-04 | NA | NA     | 0.0023 | 0        |
| NM_015253    | WSCD1       | 0                  | 0.327124034529759 | 1     | 2.00E-04 | NA | NA     | 0.0023 | 0        |
| NM_012265    | RHBDD3      | 0                  | 0.327124034529759 | 1     | 2.00E-04 | NA | NA     | 0.0023 | 0        |
| NM_012419    | RGS17       | 0                  | 0.327124034529759 | 1     | 2.00E-04 | NA | NA     | 0.0023 | 0        |
| NM_001042698 | ZSWIM7      | 0.208995910949568  | 0.536119945479328 | 0.998 | 0.0024   | 1  | 0.1552 | 0.025  | 4.00E-04 |

|              |            |                    |                   |        |          |    |        |        |          |
|--------------|------------|--------------------|-------------------|--------|----------|----|--------|--------|----------|
| NM_001042697 | ZSWIM7     | 0.208995910949568  | 0.536119945479328 | 0.9982 | 0.0022   | 1  | 0.1552 | 0.025  | 4.00E-04 |
| NM_016428    | ABI3       | 0                  | 0.327578373466606 | 1      | 2.00E-04 | NA | NA     | 0.0023 | 0        |
| NM_001135186 | ABI3       | 0                  | 0.327578373466606 | 1      | 2.00E-04 | NA | NA     | 0.0023 | 0        |
| NM_014290    | TDRD7      | 0                  | 0.327578373466606 | 1      | 2.00E-04 | NA | NA     | 0.0023 | 0        |
| NM_174899    | FBXO36     | 0                  | 0.328032712403453 | 1      | 2.00E-04 | NA | NA     | 0.0023 | 0        |
| NR_037861    | PPT2-EGFL8 | 0                  | 0.328032712403453 | 1      | 2.00E-04 | NA | NA     | 0.0023 | 0        |
| NM_138717    | PPT2       | 0                  | 0.328032712403453 | 1      | 2.00E-04 | NA | NA     | 0.0023 | 0        |
| NM_005155    | PPT2       | 0                  | 0.328032712403453 | 1      | 2.00E-04 | NA | NA     | 0.0023 | 0        |
| NM_001204103 | PPT2       | 0                  | 0.328032712403453 | 1      | 2.00E-04 | NA | NA     | 0.0023 | 0        |
| NM_178862    | STT3B      | 0                  | 0.3284870513403   | 1      | 2.00E-04 | NA | NA     | 0.0023 | 0        |
| NR_027621    | FHL1       | 0                  | 0.3284870513403   | 1      | 2.00E-04 | NA | NA     | 0.0023 | 0        |
| NM_001272077 | RIT2       | 0                  | 0.3284870513403   | 1      | 2.00E-04 | NA | NA     | 0.0023 | 0        |
| NM_002930    | RIT2       | 0                  | 0.3284870513403   | 1      | 2.00E-04 | NA | NA     | 0.0023 | 0        |
| NM_001284214 | TRIP12     | 0                  | 0.3284870513403   | 1      | 2.00E-04 | NA | NA     | 0.0023 | 0        |
| NM_001284216 | TRIP12     | 0                  | 0.3284870513403   | 1      | 2.00E-04 | NA | NA     | 0.0023 | 0        |
| NM_004238    | TRIP12     | 0                  | 0.3284870513403   | 1      | 2.00E-04 | NA | NA     | 0.0023 | 0        |
| NM_032478    | MRPL38     | 0.0072694229895502 | 0.336210813266697 | 1      | 2.00E-04 | NA | NA     | 0.0023 | 0        |
| NM_005875    | EIF1B      | 0                  | 0.328941390277147 | 1      | 2.00E-04 | NA | NA     | 0.0023 | 0        |
| NM_001142557 | HMMR       | 0                  | 0.328941390277147 | 1      | 2.00E-04 | NA | NA     | 0.0023 | 0        |
| NM_012484    | HMMR       | 0                  | 0.328941390277147 | 1      | 2.00E-04 | NA | NA     | 0.0023 | 0        |
| NM_001142556 | HMMR       | 0                  | 0.328941390277147 | 1      | 2.00E-04 | NA | NA     | 0.0023 | 0        |
| NM_012485    | HMMR       | 0                  | 0.328941390277147 | 1      | 2.00E-04 | NA | NA     | 0.0023 | 0        |
| NM_080817    | GPR82      | 0                  | 0.328941390277147 | 1      | 2.00E-04 | NA | NA     | 0.0023 | 0        |
| NM_017752    | TBC1D8B    | 0                  | 0.328941390277147 | 1      | 2.00E-04 | NA | NA     | 0.0023 | 0        |
| NM_198881    | TBC1D8B    | 0                  | 0.328941390277147 | 1      | 2.00E-04 | NA | NA     | 0.0023 | 0        |
| NM_032949    | PCDH8      | 0                  | 0.328941390277147 | 1      | 2.00E-04 | NA | NA     | 0.0023 | 0        |
| NM_002590    | PCDH8      | 0                  | 0.328941390277147 | 1      | 2.00E-04 | NA | NA     | 0.0023 | 0        |
| NM_030651    | PRRT1      | 0                  | 0.328941390277147 | 1      | 2.00E-04 | NA | NA     | 0.0023 | 0        |
| NM_000139    | MS4A2      | 0                  | 0.329395729213994 | 1      | 2.00E-04 | NA | NA     | 0.0023 | 0        |
| NM_001256916 | MS4A2      | 0                  | 0.329395729213994 | 1      | 2.00E-04 | NA | NA     | 0.0023 | 0        |
| NM_014907    | FRMPD1     | 0                  | 0.329395729213994 | 1      | 2.00E-04 | NA | NA     | 0.0023 | 0        |
| NM_017672    | TRPM7      | 0                  | 0.329395729213994 | 1      | 2.00E-04 | NA | NA     | 0.0023 | 0        |
| NM_001130845 | BCL6       | 0                  | 0.329395729213994 | 1      | 2.00E-04 | NA | NA     | 0.0023 | 0        |
| NM_014548    | TMOD2      | 0                  | 0.329850068150841 | 1      | 2.00E-04 | NA | NA     | 0.0023 | 0        |
| NM_001142885 | TMOD2      | 0                  | 0.329850068150841 | 1      | 2.00E-04 | NA | NA     | 0.0023 | 0        |
| NM_004246    | GLP2R      | 0                  | 0.329850068150841 | 1      | 2.00E-04 | NA | NA     | 0.0023 | 0        |
| NM_032120    | RBM48      | 0                  | 0.329850068150841 | 1      | 2.00E-04 | NA | NA     | 0.0023 | 0        |
| NM_001166107 | HMGCS2     | 0                  | 0.329850068150841 | 1      | 2.00E-04 | NA | NA     | 0.0023 | 0        |
| NM_005518    | HMGCS2     | 0                  | 0.329850068150841 | 1      | 2.00E-04 | NA | NA     | 0.0023 | 0        |
| NM_145234    | CHRD1      | 0                  | 0.329850068150841 | 1      | 2.00E-04 | NA | NA     | 0.0023 | 0        |
| NM_001143983 | CHRD1      | 0                  | 0.329850068150841 | 1      | 2.00E-04 | NA | NA     | 0.0023 | 0        |
| NM_001143982 | CHRD1      | 0                  | 0.329850068150841 | 1      | 2.00E-04 | NA | NA     | 0.0023 | 0        |
| NM_001143981 | CHRD1      | 0                  | 0.329850068150841 | 1      | 2.00E-04 | NA | NA     | 0.0023 | 0        |
| NM_014679    | CEP57      | 0                  | 0.330304407087687 | 1      | 2.00E-04 | NA | NA     | 0.0023 | 0        |
| NM_001243777 | CEP57      | 0                  | 0.330304407087687 | 1      | 2.00E-04 | NA | NA     | 0.0023 | 0        |
| NM_001243776 | CEP57      | 0                  | 0.330304407087687 | 1      | 2.00E-04 | NA | NA     | 0.0023 | 0        |
| NM_012118    | CCRN4L     | 0                  | 0.330304407087687 | 1      | 2.00E-04 | NA | NA     | 0.0023 | 0        |



|              |             |                    |                   |       |          |    |    |        |          |
|--------------|-------------|--------------------|-------------------|-------|----------|----|----|--------|----------|
| NR_039924    | MIR4767     | 0.0222626079054975 | 0.352567014993185 | 0.998 | 0.0024   | NA | NA | 0.025  | 4.00E-04 |
| NR_038251    | DPH6-AS1    | 0                  | 0.330758746024534 | 1     | 2.00E-04 | NA | NA | 0.0023 | 0        |
| NM_005985    | SNAI1       | 0                  | 0.330758746024534 | 1     | 2.00E-04 | NA | NA | 0.0023 | 0        |
| NM_024730    | REGL        | 0                  | 0.330758746024534 | 1     | 2.00E-04 | NA | NA | 0.0023 | 0        |
| NR_003338    | SNORD116-24 | 0                  | 0.331213084961381 | 1     | 2.00E-04 | NA | NA | 0.0023 | 0        |
| NM_001042355 | CYLD        | 0                  | 0.331213084961381 | 1     | 2.00E-04 | NA | NA | 0.0023 | 0        |
| NM_015247    | CYLD        | 0                  | 0.331213084961381 | 1     | 2.00E-04 | NA | NA | 0.0023 | 0        |
| NM_001042412 | CYLD        | 0                  | 0.331213084961381 | 1     | 2.00E-04 | NA | NA | 0.0023 | 0        |
| NM_001077620 | PRCD        | 0                  | 0.331213084961381 | 1     | 2.00E-04 | NA | NA | 0.0023 | 0        |
| NM_020731    | AHRR        | 0                  | 0.331213084961381 | 1     | 2.00E-04 | NA | NA | 0.0023 | 0        |
| NM_001242412 | AHRR        | 0                  | 0.331213084961381 | 1     | 2.00E-04 | NA | NA | 0.0023 | 0        |
| NM_001171909 | CXorf40A    | 0                  | 0.331213084961381 | 1     | 2.00E-04 | NA | NA | 0.0023 | 0        |
| NR_037653    | ST20        | 0                  | 0.331213084961381 | 1     | 2.00E-04 | NA | NA | 0.0023 | 0        |
| NR_037652    | ST20        | 0                  | 0.331213084961381 | 1     | 2.00E-04 | NA | NA | 0.0023 | 0        |
| NM_022725    | FANCF       | 0                  | 0.331667423898228 | 1     | 2.00E-04 | NA | NA | 0.0023 | 0        |
| NM_001278608 | BFSP1       | 0                  | 0.331667423898228 | 1     | 2.00E-04 | NA | NA | 0.0023 | 0        |
| NM_052827    | CDK2        | 0                  | 0.332121762835075 | 1     | 2.00E-04 | NA | NA | 0.0023 | 0        |
| NM_001798    | CDK2        | 0                  | 0.332121762835075 | 1     | 2.00E-04 | NA | NA | 0.0023 | 0        |
| NM_134268    | CYGB        | 0                  | 0.332121762835075 | 1     | 2.00E-04 | NA | NA | 0.0023 | 0        |
| NM_004364    | CEBPA       | 0                  | 0.332121762835075 | 1     | 2.00E-04 | NA | NA | 0.0023 | 0        |
| NR_026766    | MYCNOS      | 0                  | 0.332121762835075 | 1     | 6.00E-04 | NA | NA | 0.0099 | 1.00E-04 |
| NR_073600    | ZNF142      | 0                  | 0.332121762835075 | 1     | 2.00E-04 | NA | NA | 0.0023 | 0        |
| NM_001105537 | ZNF142      | 0                  | 0.332121762835075 | 1     | 2.00E-04 | NA | NA | 0.0023 | 0        |
| NR_104136    | MANEA-AS1   | 0.0181735574738755 | 0.350749659245797 | 1     | 2.00E-04 | NA | NA | 0.0023 | 0        |
| NR_047502    | MANEA-AS1   | 0.0181735574738755 | 0.350749659245797 | 1     | 2.00E-04 | NA | NA | 0.0023 | 0        |
| NM_021734    | SLC25A19    | 0                  | 0.332576101771922 | 1     | 2.00E-04 | NA | NA | 0.0023 | 0        |
| NM_001126122 | SLC25A19    | 0                  | 0.332576101771922 | 1     | 2.00E-04 | NA | NA | 0.0023 | 0        |
| NM_001126121 | SLC25A19    | 0                  | 0.332576101771922 | 1     | 2.00E-04 | NA | NA | 0.0023 | 0        |
| NM_032510    | PAR6G       | 0                  | 0.332576101771922 | 1     | 2.00E-04 | NA | NA | 0.0023 | 0        |
| NM_033427    | CTTNBP2     | 0                  | 0.333030440708769 | 1     | 2.00E-04 | NA | NA | 0.0023 | 0        |
| NM_001032292 | ZNF174      | 0                  | 0.333484779645616 | 1     | 6.00E-04 | NA | NA | 0.0099 | 1.00E-04 |
| NM_003450    | ZNF174      | 0                  | 0.333484779645616 | 1     | 6.00E-04 | NA | NA | 0.0099 | 1.00E-04 |
| NM_001137554 | MCTS1       | 0                  | 0.333484779645616 | 1     | 2.00E-04 | NA | NA | 0.0023 | 0        |
| NM_001256932 | LOC730183   | 0                  | 0.333484779645616 | 1     | 2.00E-04 | NA | NA | 0.0023 | 0        |
| NM_001199346 | C18orf32    | 0                  | 0.333484779645616 | 1     | 2.00E-04 | NA | NA | 0.0023 | 0        |
| NM_001035005 | C18orf32    | 0                  | 0.333484779645616 | 1     | 2.00E-04 | NA | NA | 0.0023 | 0        |
| NM_021244    | RRAGD       | 0                  | 0.333484779645616 | 1     | 2.00E-04 | NA | NA | 0.0023 | 0        |
| NR_023920    | WT1-AS      | 0                  | 0.333939118582463 | 1     | 2.00E-04 | NA | NA | 0.0023 | 0        |
| NM_052902    | STK11IP     | 0                  | 0.333939118582463 | 1     | 2.00E-04 | NA | NA | 0.0023 | 0        |
| NR_036498    | LOC388906   | 0                  | 0.333939118582463 | 1     | 2.00E-04 | NA | NA | 0.0023 | 0        |
| NM_001098812 | 39692       | 0                  | 0.333939118582463 | 1     | 2.00E-04 | NA | NA | 0.0023 | 0        |
| NM_015146    | 39692       | 0                  | 0.333939118582463 | 1     | 2.00E-04 | NA | NA | 0.0023 | 0        |
| NM_001098811 | 39692       | 0                  | 0.333939118582463 | 1     | 2.00E-04 | NA | NA | 0.0023 | 0        |
| NM_005249    | FOXG1       | 0                  | 0.334393457519309 | 1     | 2.00E-04 | NA | NA | 0.0023 | 0        |
| NM_001199898 | PKD2        | 0                  | 0.334393457519309 | 1     | 2.00E-04 | NA | NA | 0.0023 | 0        |
| NR_077247    | RPS18P9     | 0                  | 0.334393457519309 | 1     | 2.00E-04 | NA | NA | 0.0023 | 0        |
| NR_047662    | LOC729732   | 0                  | 0.334393457519309 | 1     | 2.00E-04 | NA | NA | 0.0023 | 0        |

|              |            |                    |                   |   |          |    |    |        |   |
|--------------|------------|--------------------|-------------------|---|----------|----|----|--------|---|
| NM_003249    | THOP1      | 0                  | 0.334847796456156 | 1 | 2.00E-04 | NA | NA | 0.0023 | 0 |
| NR_037161    | ZNF582-AS1 | 0                  | 0.334847796456156 | 1 | 2.00E-04 | NA | NA | 0.0023 | 0 |
| NR_037159    | ZNF582-AS1 | 0                  | 0.334847796456156 | 1 | 2.00E-04 | NA | NA | 0.0023 | 0 |
| NR_037160    | ZNF582-AS1 | 0                  | 0.334847796456156 | 1 | 2.00E-04 | NA | NA | 0.0023 | 0 |
| NM_144770    | RBM11      | 0                  | 0.334847796456156 | 1 | 2.00E-04 | NA | NA | 0.0023 | 0 |
| NM_004951    | GPR183     | 0                  | 0.334847796456156 | 1 | 2.00E-04 | NA | NA | 0.0023 | 0 |
| NM_003021    | SGTA       | 0                  | 0.334847796456156 | 1 | 2.00E-04 | NA | NA | 0.0023 | 0 |
| NM_152570    | LINGO2     | 0.112221717401181  | 0.447523852794184 | 1 | 2.00E-04 | NA | NA | 0.0023 | 0 |
| NM_001076552 | ACSS2      | 0                  | 0.335302135393003 | 1 | 2.00E-04 | NA | NA | 0.0023 | 0 |
| NM_018677    | ACSS2      | 0                  | 0.335302135393003 | 1 | 2.00E-04 | NA | NA | 0.0023 | 0 |
| NM_005754    | G3BP1      | 0                  | 0.335302135393003 | 1 | 2.00E-04 | NA | NA | 0.0023 | 0 |
| NM_198395    | G3BP1      | 0                  | 0.335302135393003 | 1 | 2.00E-04 | NA | NA | 0.0023 | 0 |
| NM_014569    | ZKSCAN5    | 0                  | 0.335302135393003 | 1 | 2.00E-04 | NA | NA | 0.0023 | 0 |
| NM_145793    | GFRA1      | 0                  | 0.335302135393003 | 1 | 2.00E-04 | NA | NA | 0.0023 | 0 |
| NM_018325    | C9orf72    | 0                  | 0.335302135393003 | 1 | 2.00E-04 | NA | NA | 0.0023 | 0 |
| NM_015203    | RPRD2      | 0                  | 0.33575647432985  | 1 | 2.00E-04 | NA | NA | 0.0023 | 0 |
| NR_045118    | KCNIP2-AS1 | 0                  | 0.33575647432985  | 1 | 2.00E-04 | NA | NA | 0.0023 | 0 |
| NM_002282    | KRT83      | 0                  | 0.33575647432985  | 1 | 2.00E-04 | NA | NA | 0.0023 | 0 |
| NM_001135216 | ZSCAN31    | 0                  | 0.33575647432985  | 1 | 2.00E-04 | NA | NA | 0.0023 | 0 |
| NM_001243244 | ZSCAN31    | 0                  | 0.33575647432985  | 1 | 2.00E-04 | NA | NA | 0.0023 | 0 |
| NM_001243243 | ZSCAN31    | 0                  | 0.33575647432985  | 1 | 2.00E-04 | NA | NA | 0.0023 | 0 |
| NM_001243242 | ZSCAN31    | 0                  | 0.33575647432985  | 1 | 2.00E-04 | NA | NA | 0.0023 | 0 |
| NM_001243241 | ZSCAN31    | 0                  | 0.33575647432985  | 1 | 2.00E-04 | NA | NA | 0.0023 | 0 |
| NM_030899    | ZSCAN31    | 0                  | 0.33575647432985  | 1 | 2.00E-04 | NA | NA | 0.0023 | 0 |
| NM_021073    | BMP5       | 0                  | 0.33575647432985  | 1 | 2.00E-04 | NA | NA | 0.0023 | 0 |
| NM_001243194 | INPP5F     | 0                  | 0.336210813266697 | 1 | 2.00E-04 | NA | NA | 0.0023 | 0 |
| NM_001128429 | SMARCAD1   | 0                  | 0.336210813266697 | 1 | 2.00E-04 | NA | NA | 0.0023 | 0 |
| NM_020159    | SMARCAD1   | 0                  | 0.336210813266697 | 1 | 2.00E-04 | NA | NA | 0.0023 | 0 |
| NR_045644    | SMARCAD1   | 0                  | 0.336210813266697 | 1 | 2.00E-04 | NA | NA | 0.0023 | 0 |
| NM_005869    | CWC27      | 0                  | 0.336210813266697 | 1 | 2.00E-04 | NA | NA | 0.0023 | 0 |
| NM_000247    | MICA       | 0                  | 0.336210813266697 | 1 | 2.00E-04 | NA | NA | 0.0023 | 0 |
| NM_001177519 | MICA       | 0                  | 0.336210813266697 | 1 | 2.00E-04 | NA | NA | 0.0023 | 0 |
| NM_178857    | RP1L1      | 0                  | 0.336210813266697 | 1 | 2.00E-04 | NA | NA | 0.0023 | 0 |
| NM_003628    | PKP4       | 0.0436165379373012 | 0.380281690140845 | 1 | 2.00E-04 | NA | NA | 0.0023 | 0 |
| NM_001005476 | PKP4       | 0.0436165379373012 | 0.380281690140845 | 1 | 2.00E-04 | NA | NA | 0.0023 | 0 |
| NM_024747    | HPS6       | 0                  | 0.336665152203544 | 1 | 2.00E-04 | NA | NA | 0.0023 | 0 |
| NM_005993    | TBCD       | 0                  | 0.336665152203544 | 1 | 2.00E-04 | NA | NA | 0.0023 | 0 |
| NM_001001410 | TSR3       | 0                  | 0.336665152203544 | 1 | 2.00E-04 | NA | NA | 0.0023 | 0 |
| NM_003955    | SOC3       | 0                  | 0.336665152203544 | 1 | 2.00E-04 | NA | NA | 0.0023 | 0 |
| NM_001040020 | FAM3C      | 0                  | 0.336665152203544 | 1 | 2.00E-04 | NA | NA | 0.0023 | 0 |
| NM_014888    | FAM3C      | 0                  | 0.336665152203544 | 1 | 2.00E-04 | NA | NA | 0.0023 | 0 |
| NM_006468    | POLR3C     | 0.149931849159473  | 0.487051340299864 | 1 | 2.00E-04 | NA | NA | 0.0023 | 0 |
| NM_006446    | SLCO1B1    | 0                  | 0.337119491140391 | 1 | 2.00E-04 | NA | NA | 0.0023 | 0 |
| NM_006635    | ZNF460     | 0                  | 0.337119491140391 | 1 | 2.00E-04 | NA | NA | 0.0023 | 0 |
| NM_018203    | KLHDC8A    | 0                  | 0.337119491140391 | 1 | 2.00E-04 | NA | NA | 0.0023 | 0 |
| NM_018252    | TMEM206    | 0                  | 0.337119491140391 | 1 | 2.00E-04 | NA | NA | 0.0023 | 0 |
| NM_001198862 | TMEM206    | 0                  | 0.337119491140391 | 1 | 2.00E-04 | NA | NA | 0.0023 | 0 |

|              |            |                    |                   |        |          |    |        |        |          |
|--------------|------------|--------------------|-------------------|--------|----------|----|--------|--------|----------|
| NM_017754    | UHRF1BP1   | 0                  | 0.337573830077238 | 1      | 2.00E-04 | NA | NA     | 0.0023 | 0        |
| NM_001128620 | PAK1       | 0                  | 0.337573830077238 | 1      | 2.00E-04 | NA | NA     | 0.0023 | 0        |
| NM_002576    | PAK1       | 0                  | 0.337573830077238 | 1      | 2.00E-04 | NA | NA     | 0.0023 | 0        |
| NM_000080    | CHRNE      | 0                  | 0.337573830077238 | 1      | 2.00E-04 | NA | NA     | 0.0023 | 0        |
| NR_027906    | MLLT4-AS1  | 0                  | 0.337573830077238 | 1      | 2.00E-04 | NA | NA     | 0.0023 | 0        |
| NM_021928    | SPCS3      | 0                  | 0.338028169014085 | 1      | 0.006    | NA | NA     | 0.0458 | 0.0011   |
| NR_024059    | MIMT1      | 0                  | 0.338482507950931 | 1      | 2.00E-04 | NA | NA     | 0.0023 | 0        |
| NM_001079863 | DBI        | 0                  | 0.338482507950931 | 1      | 2.00E-04 | NA | NA     | 0.0023 | 0        |
| NM_031461    | CRISPLD1   | 0                  | 0.338482507950931 | 1      | 2.00E-04 | NA | NA     | 0.0023 | 0        |
| NM_001780    | CD63       | 0                  | 0.338482507950931 | 1      | 2.00E-04 | NA | NA     | 0.0023 | 0        |
| NM_001267698 | CD63       | 0                  | 0.338482507950931 | 1      | 2.00E-04 | NA | NA     | 0.0023 | 0        |
| NM_001013628 | DCAF12L2   | 0                  | 0.338482507950931 | 1      | 2.00E-04 | NA | NA     | 0.0023 | 0        |
| NR_036595    | LOC440600  | 0                  | 0.338936846887778 | 1      | 2.00E-04 | NA | NA     | 0.0023 | 0        |
| NM_001017927 | C2orf76    | 0                  | 0.338936846887778 | 1      | 2.00E-04 | NA | NA     | 0.0023 | 0        |
| NR_024454    | NDUFB2-AS1 | 0                  | 0.338936846887778 | 1      | 2.00E-04 | NA | NA     | 0.0023 | 0        |
| NM_001017372 | SLC27A6    | 0                  | 0.339391185824625 | 1      | 2.00E-04 | NA | NA     | 0.0023 | 0        |
| NM_014031    | SLC27A6    | 0                  | 0.339391185824625 | 1      | 2.00E-04 | NA | NA     | 0.0023 | 0        |
| NM_152455    | ZSCAN29    | 0                  | 0.339391185824625 | 1      | 2.00E-04 | NA | NA     | 0.0023 | 0        |
| NM_170713    | RASSF1     | 0                  | 0.339391185824625 | 1      | 2.00E-04 | NA | NA     | 0.0023 | 0        |
| NM_001949    | E2F3       | 0                  | 0.339845524761472 | 1      | 2.00E-04 | NA | NA     | 0.0023 | 0        |
| NM_030905    | OR2J2      | 0                  | 0.339845524761472 | 1      | 2.00E-04 | NA | NA     | 0.0023 | 0        |
| NM_001276290 | PRKAR1A    | 0                  | 0.340299863698319 | 1      | 2.00E-04 | NA | NA     | 0.0023 | 0        |
| NM_001145346 | RBMXL3     | 0                  | 0.340299863698319 | 1      | 2.00E-04 | NA | NA     | 0.0023 | 0        |
| NM_015836    | WARS2      | 0                  | 0.340299863698319 | 1      | 2.00E-04 | NA | NA     | 0.0023 | 0        |
| NM_201263    | WARS2      | 0                  | 0.340299863698319 | 1      | 2.00E-04 | NA | NA     | 0.0023 | 0        |
| NM_001352    | DBP        | 0                  | 0.340299863698319 | 1      | 0.0012   | NA | NA     | 0.0099 | 2.00E-04 |
| NM_001164738 | CALCR      | 0                  | 0.340299863698319 | 1      | 2.00E-04 | NA | NA     | 0.0023 | 0        |
| NM_018725    | IL17RB     | 0                  | 0.340754202635166 | 1      | 2.00E-04 | NA | NA     | 0.0023 | 0        |
| NM_001258039 | SPRY1      | 0                  | 0.340754202635166 | 1      | 2.00E-04 | NA | NA     | 0.0023 | 0        |
| NM_080879    | RAB40A     | 0                  | 0.340754202635166 | 1      | 2.00E-04 | NA | NA     | 0.0023 | 0        |
| NM_014633    | CTR9       | 0                  | 0.341208541572013 | 1      | 2.00E-04 | NA | NA     | 0.0023 | 0        |
| NM_001271507 | CCDC177    | 0                  | 0.341208541572013 | 1      | 2.00E-04 | NA | NA     | 0.0023 | 0        |
| NM_001242784 | HLCS       | 0                  | 0.341208541572013 | 1      | 2.00E-04 | NA | NA     | 0.0023 | 0        |
| NM_016395    | PTPLAD1    | 0.0290776919582008 | 0.37074057246706  | 1      | 2.00E-04 | NA | NA     | 0.0023 | 0        |
| NM_005921    | MAP3K1     | 0.224897773739209  | 0.566560654248069 | 1      | 2.00E-04 | 1  | 0.1555 | 0.0023 | 0        |
| NM_007148    | RNF112     | 0                  | 0.34166288050886  | 1      | 2.00E-04 | NA | NA     | 0.0023 | 0        |
| NM_016436    | PHF20      | 0                  | 0.34166288050886  | 1      | 2.00E-04 | NA | NA     | 0.0023 | 0        |
| NR_033886    | RAD21-AS1  | 0                  | 0.34166288050886  | 1      | 2.00E-04 | NA | NA     | 0.0023 | 0        |
| NM_001018056 | VLDLR      | 0                  | 0.34166288050886  | 1      | 4.00E-04 | NA | NA     | 0.0023 | 1.00E-04 |
| NM_003383    | VLDLR      | 0                  | 0.34166288050886  | 1      | 2.00E-04 | NA | NA     | 0.0023 | 0        |
| NM_018558    | GABRQ      | 0                  | 0.34166288050886  | 1      | 2.00E-04 | NA | NA     | 0.0023 | 0        |
| NM_176787    | PIGN       | 0                  | 0.34166288050886  | 0.999  | 4.00E-04 | NA | NA     | 0.0023 | 1.00E-04 |
| NM_012327    | PIGN       | 0                  | 0.34166288050886  | 0.9994 | 6.00E-04 | NA | NA     | 0.0099 | 1.00E-04 |
| NM_022757    | CCDC14     | 0                  | 0.34166288050886  | 1      | 2.00E-04 | NA | NA     | 0.0023 | 0        |
| NM_001024611 | LRRRC66    | 0                  | 0.34166288050886  | 1      | 2.00E-04 | NA | NA     | 0.0023 | 0        |
| NM_001145450 | MORN2      | 0                  | 0.342117219445706 | 1      | 2.00E-04 | NA | NA     | 0.0023 | 0        |
| NM_001130049 | DOCK9      | 0                  | 0.342117219445706 | 1      | 2.00E-04 | NA | NA     | 0.0023 | 0        |

|              |         |                    |                   |        |          |    |    |        |          |
|--------------|---------|--------------------|-------------------|--------|----------|----|----|--------|----------|
| NM_015296    | DOCK9   | 0                  | 0.342117219445706 | 1      | 2.00E-04 | NA | NA | 0.0023 | 0        |
| NM_001136205 | KCTD1   | 0                  | 0.342117219445706 | 1      | 2.00E-04 | NA | NA | 0.0023 | 0        |
| NM_033319    | CENPL   | 0.0472512494320763 | 0.389368468877783 | 0.991  | 0.0068   | NA | NA | 0.0916 | 0.0012   |
| NM_001127181 | CENPL   | 0.0472512494320763 | 0.389368468877783 | 0.9928 | 0.0076   | NA | NA | 0.0916 | 0.0013   |
| NR_029525    | MIR16-2 | 0.120854157201272  | 0.462971376646979 | 1      | 2.00E-04 | NA | NA | 0.0023 | 0        |
| NM_015302    | HAUS5   | 0                  | 0.342571558382553 | 1      | 2.00E-04 | NA | NA | 0.0023 | 0        |
| NM_002357    | MXD1    | 0                  | 0.342571558382553 | 1      | 2.00E-04 | NA | NA | 0.0023 | 0        |
| NM_001202514 | MXD1    | 0                  | 0.342571558382553 | 1      | 2.00E-04 | NA | NA | 0.0023 | 0        |
| NM_001202513 | MXD1    | 0                  | 0.342571558382553 | 1      | 2.00E-04 | NA | NA | 0.0023 | 0        |
| NM_004319    | ASTN1   | 0                  | 0.342571558382553 | 1      | 2.00E-04 | NA | NA | 0.0023 | 0        |
| NM_207108    | ASTN1   | 0                  | 0.342571558382553 | 1      | 2.00E-04 | NA | NA | 0.0023 | 0        |
| NM_000520    | HEXA    | 0                  | 0.342571558382553 | 1      | 2.00E-04 | NA | NA | 0.0023 | 0        |
| NM_177952    | PPM1A   | 0                  | 0.3430258973194   | 1      | 2.00E-04 | NA | NA | 0.0023 | 0        |
| NM_178140    | PDZD2   | 0                  | 0.3430258973194   | 1      | 2.00E-04 | NA | NA | 0.0023 | 0        |
| NM_001004454 | OR1L8   | 0                  | 0.3430258973194   | 1      | 2.00E-04 | NA | NA | 0.0023 | 0        |
| NM_001190987 | SRSF11  | 0                  | 0.343480236256247 | 1      | 2.00E-04 | NA | NA | 0.0023 | 0        |
| NM_004768    | SRSF11  | 0                  | 0.343480236256247 | 1      | 2.00E-04 | NA | NA | 0.0023 | 0        |
| NM_133339    | RAD17   | 0                  | 0.343480236256247 | 1      | 2.00E-04 | NA | NA | 0.0023 | 0        |
| NM_019118    | TMEM234 | 0                  | 0.343480236256247 | 1      | 2.00E-04 | NA | NA | 0.0023 | 0        |
| NM_014932    | NLGN1   | 0                  | 0.343934575193094 | 1      | 2.00E-04 | NA | NA | 0.0023 | 0        |
| NM_001143836 | NOX4    | 0                  | 0.343934575193094 | 1      | 2.00E-04 | NA | NA | 0.0023 | 0        |
| NM_016931    | NOX4    | 0                  | 0.343934575193094 | 1      | 2.00E-04 | NA | NA | 0.0023 | 0        |
| NR_026571    | NOX4    | 0                  | 0.343934575193094 | 1      | 2.00E-04 | NA | NA | 0.0023 | 0        |
| NM_003187    | TAF9    | 0                  | 0.343934575193094 | 1      | 2.00E-04 | NA | NA | 0.0023 | 0        |
| NM_016283    | AK6     | 0                  | 0.343934575193094 | 1      | 2.00E-04 | NA | NA | 0.0023 | 0        |
| NM_033161    | SURF4   | 0                  | 0.343934575193094 | 0.999  | 0.002    | NA | NA | 0.025  | 4.00E-04 |
| NM_001280792 | SURF4   | 0                  | 0.343934575193094 | 0.9988 | 0.0018   | NA | NA | 0.0183 | 3.00E-04 |
| NM_001280789 | SURF4   | 0                  | 0.343934575193094 | 0.999  | 0.001    | NA | NA | 0.0099 | 2.00E-04 |
| NM_001280790 | SURF4   | 0                  | 0.343934575193094 | 0.9996 | 0.001    | NA | NA | 0.0099 | 2.00E-04 |
| NM_001280791 | SURF4   | 0                  | 0.343934575193094 | 0.999  | 0.0012   | NA | NA | 0.0099 | 2.00E-04 |
| NM_001280793 | SURF4   | 0                  | 0.343934575193094 | 0.999  | 0.0012   | NA | NA | 0.0099 | 2.00E-04 |
| NM_019005    | MIOS    | 0.0949568378009995 | 0.43934575193094  | 1      | 2.00E-04 | NA | NA | 0.0023 | 0        |
| NM_001080458 | EVX2    | 0                  | 0.344388914129941 | 1      | 2.00E-04 | NA | NA | 0.0023 | 0        |
| NM_000809    | GABRA4  | 0                  | 0.344388914129941 | 1      | 2.00E-04 | NA | NA | 0.0023 | 0        |
| NM_001190384 | GNE     | 0                  | 0.344388914129941 | 1      | 2.00E-04 | NA | NA | 0.0023 | 0        |
| NM_001190383 | GNE     | 0                  | 0.344388914129941 | 1      | 2.00E-04 | NA | NA | 0.0023 | 0        |
| NM_005476    | GNE     | 0                  | 0.344388914129941 | 1      | 2.00E-04 | NA | NA | 0.0023 | 0        |
| NM_001040061 | C3orf72 | 0                  | 0.344843253066788 | 1      | 2.00E-04 | NA | NA | 0.0023 | 0        |
| NM_001040167 | LFNG    | 0                  | 0.344843253066788 | 1      | 2.00E-04 | NA | NA | 0.0023 | 0        |
| NM_001040168 | LFNG    | 0                  | 0.344843253066788 | 1      | 2.00E-04 | NA | NA | 0.0023 | 0        |
| NM_001085447 | CCDC173 | 0                  | 0.344843253066788 | 1      | 2.00E-04 | NA | NA | 0.0023 | 0        |
| NM_032970    | SEC22C  | 0                  | 0.344843253066788 | 1      | 2.00E-04 | NA | NA | 0.0023 | 0        |
| NM_001201584 | SEC22C  | 0                  | 0.344843253066788 | 1      | 2.00E-04 | NA | NA | 0.0023 | 0        |
| NM_004206    | SEC22C  | 0                  | 0.344843253066788 | 1      | 2.00E-04 | NA | NA | 0.0023 | 0        |
| NM_203291    | RBBP8   | 0                  | 0.345297592003635 | 0.9998 | 4.00E-04 | NA | NA | 0.0023 | 1.00E-04 |
| NM_203292    | RBBP8   | 0                  | 0.345297592003635 | 1      | 4.00E-04 | NA | NA | 0.0023 | 1.00E-04 |
| NM_032343    | CHCHD6  | 0                  | 0.345297592003635 | 1      | 2.00E-04 | NA | NA | 0.0023 | 0        |

|              |           |                   |                   |   |          |    |    |        |          |
|--------------|-----------|-------------------|-------------------|---|----------|----|----|--------|----------|
| NM_006947    | SRP72     | 0                 | 0.345297592003635 | 1 | 2.00E-04 | NA | NA | 0.0023 | 0        |
| NM_001267722 | SRP72     | 0                 | 0.345297592003635 | 1 | 2.00E-04 | NA | NA | 0.0023 | 0        |
| NM_025141    | TM2D3     | 0                 | 0.345297592003635 | 1 | 2.00E-04 | NA | NA | 0.0023 | 0        |
| NM_078474    | TM2D3     | 0                 | 0.345297592003635 | 1 | 2.00E-04 | NA | NA | 0.0023 | 0        |
| NM_001199828 | SPRR1A    | 0                 | 0.345751930940482 | 1 | 2.00E-04 | NA | NA | 0.0023 | 0        |
| NM_005987    | SPRR1A    | 0                 | 0.345751930940482 | 1 | 2.00E-04 | NA | NA | 0.0023 | 0        |
| NM_006407    | ARL6IP5   | 0                 | 0.345751930940482 | 1 | 2.00E-04 | NA | NA | 0.0023 | 0        |
| NM_015527    | TBC1D10B  | 0                 | 0.345751930940482 | 1 | 2.00E-04 | NA | NA | 0.0023 | 0        |
| NM_001278548 | MAPK8     | 0                 | 0.346206269877328 | 1 | 2.00E-04 | NA | NA | 0.0023 | 0        |
| NM_139049    | MAPK8     | 0                 | 0.346206269877328 | 1 | 2.00E-04 | NA | NA | 0.0023 | 0        |
| NM_002750    | MAPK8     | 0                 | 0.346206269877328 | 1 | 2.00E-04 | NA | NA | 0.0023 | 0        |
| NM_139046    | MAPK8     | 0                 | 0.346206269877328 | 1 | 2.00E-04 | NA | NA | 0.0023 | 0        |
| NM_005479    | FRAT1     | 0                 | 0.346206269877328 | 1 | 2.00E-04 | NA | NA | 0.0023 | 0        |
| NM_001145258 | IRAK4     | 0                 | 0.346206269877328 | 1 | 2.00E-04 | NA | NA | 0.0023 | 0        |
| NM_001145256 | IRAK4     | 0                 | 0.346206269877328 | 1 | 2.00E-04 | NA | NA | 0.0023 | 0        |
| NM_016123    | IRAK4     | 0                 | 0.346206269877328 | 1 | 2.00E-04 | NA | NA | 0.0023 | 0        |
| NM_001145257 | IRAK4     | 0                 | 0.346206269877328 | 1 | 2.00E-04 | NA | NA | 0.0023 | 0        |
| NM_001114182 | IRAK4     | 0                 | 0.346206269877328 | 1 | 2.00E-04 | NA | NA | 0.0023 | 0        |
| NR_046105    | MIR137HG  | 0                 | 0.346660608814175 | 1 | 2.00E-04 | NA | NA | 0.0023 | 0        |
| NM_198275    | MPZL3     | 0                 | 0.346660608814175 | 1 | 2.00E-04 | NA | NA | 0.0023 | 0        |
| NM_001256782 | 38231     | 0                 | 0.346660608814175 | 1 | 2.00E-04 | NA | NA | 0.0023 | 0        |
| NM_001198713 | 38231     | 0                 | 0.346660608814175 | 1 | 2.00E-04 | NA | NA | 0.0023 | 0        |
| NM_006937    | SUMO2     | 0                 | 0.346660608814175 | 1 | 2.00E-04 | NA | NA | 0.0023 | 0        |
| NM_001005849 | SUMO2     | 0                 | 0.346660608814175 | 1 | 2.00E-04 | NA | NA | 0.0023 | 0        |
| NM_001109689 | ZNF250    | 0.036347114947751 | 0.383462062698773 | 1 | 2.00E-04 | NA | NA | 0.0023 | 0        |
| NM_021061    | ZNF250    | 0.036347114947751 | 0.383462062698773 | 1 | 2.00E-04 | NA | NA | 0.0023 | 0        |
| NM_004112    | FGF11     | 0                 | 0.347114947751022 | 1 | 2.00E-04 | NA | NA | 0.0023 | 0        |
| NM_004546    | NDUFB2    | 0                 | 0.347114947751022 | 1 | 2.00E-04 | NA | NA | 0.0023 | 0        |
| NM_020464    | NHSL1     | 0                 | 0.347114947751022 | 1 | 2.00E-04 | NA | NA | 0.0023 | 0        |
| NM_001040710 | FAM228A   | 0                 | 0.347569286687869 | 1 | 2.00E-04 | NA | NA | 0.0023 | 0        |
| NM_001114982 | TP63      | 0                 | 0.347569286687869 | 1 | 2.00E-04 | NA | NA | 0.0023 | 0        |
| NM_001114981 | TP63      | 0                 | 0.347569286687869 | 1 | 2.00E-04 | NA | NA | 0.0023 | 0        |
| NM_001114980 | TP63      | 0                 | 0.347569286687869 | 1 | 2.00E-04 | NA | NA | 0.0023 | 0        |
| NM_001256214 | ATP1A3    | 0                 | 0.347569286687869 | 1 | 2.00E-04 | NA | NA | 0.0023 | 0        |
| NM_152296    | ATP1A3    | 0                 | 0.347569286687869 | 1 | 2.00E-04 | NA | NA | 0.0023 | 0        |
| NM_001097589 | SPRR3     | 0                 | 0.348023625624716 | 1 | 2.00E-04 | NA | NA | 0.0023 | 0        |
| NM_005416    | SPRR3     | 0                 | 0.348023625624716 | 1 | 2.00E-04 | NA | NA | 0.0023 | 0        |
| NM_001113324 | TEN1      | 0                 | 0.348023625624716 | 1 | 2.00E-04 | NA | NA | 0.0023 | 0        |
| NR_037709    | TEN1-CDK3 | 0                 | 0.348023625624716 | 1 | 2.00E-04 | NA | NA | 0.0023 | 0        |
| NM_001278591 | LIAS      | 0.084961381190368 | 0.433439345751931 | 1 | 2.00E-04 | NA | NA | 0.0023 | 0        |
| NM_001278590 | LIAS      | 0.084961381190368 | 0.433439345751931 | 1 | 2.00E-04 | NA | NA | 0.0023 | 0        |
| NM_194451    | LIAS      | 0.084961381190368 | 0.433439345751931 | 1 | 2.00E-04 | NA | NA | 0.0023 | 0        |
| NM_006859    | LIAS      | 0.084961381190368 | 0.433439345751931 | 1 | 2.00E-04 | NA | NA | 0.0023 | 0        |
| NM_001278592 | LIAS      | 0.084961381190368 | 0.433439345751931 | 1 | 2.00E-04 | NA | NA | 0.0023 | 0        |
| NM_006322    | TUBGCP3   | 0                 | 0.348477964561563 | 1 | 4.00E-04 | NA | NA | 0.0023 | 1.00E-04 |
| NM_001271318 | ZNF512    | 0.101771921853703 | 0.45115856428896  | 1 | 2.00E-04 | NA | NA | 0.0023 | 0        |
| NM_032434    | ZNF512    | 0.101771921853703 | 0.45115856428896  | 1 | 2.00E-04 | NA | NA | 0.0023 | 0        |

|              |          |                    |                   |        |          |    |    |        |   |
|--------------|----------|--------------------|-------------------|--------|----------|----|----|--------|---|
| NM_001271288 | ZNF512   | 0.101771921853703  | 0.45115856428896  | 1      | 2.00E-04 | NA | NA | 0.0023 | 0 |
| NM_001271287 | ZNF512   | 0.101771921853703  | 0.45115856428896  | 1      | 2.00E-04 | NA | NA | 0.0023 | 0 |
| NM_001271289 | ZNF512   | 0.101771921853703  | 0.45115856428896  | 1      | 2.00E-04 | NA | NA | 0.0023 | 0 |
| NM_001271286 | ZNF512   | 0.101771921853703  | 0.45115856428896  | 1      | 2.00E-04 | NA | NA | 0.0023 | 0 |
| NM_014738    | KIAA0195 | 0                  | 0.349386642435257 | 1      | 2.00E-04 | NA | NA | 0.0023 | 0 |
| NR_027392    | INTS4L2  | 0                  | 0.349386642435257 | 1      | 2.00E-04 | NA | NA | 0.0023 | 0 |
| NM_199424    | WWP2     | 0.0222626079054975 | 0.372103589277601 | 1      | 2.00E-04 | NA | NA | 0.0023 | 0 |
| NM_203403    | LURAP1L  | 0                  | 0.349840981372104 | 1      | 2.00E-04 | NA | NA | 0.0023 | 0 |
| NM_004527    | MEOX1    | 0                  | 0.349840981372104 | 1      | 2.00E-04 | NA | NA | 0.0023 | 0 |
| NM_013999    | MEOX1    | 0                  | 0.349840981372104 | 1      | 2.00E-04 | NA | NA | 0.0023 | 0 |
| NM_001199174 | MLST8    | 0                  | 0.35029532030895  | 1      | 2.00E-04 | NA | NA | 0.0023 | 0 |
| NM_020719    | PRR12    | 0                  | 0.35029532030895  | 1      | 2.00E-04 | NA | NA | 0.0023 | 0 |
| NM_001278641 | RANBP1   | 0.0268059972739664 | 0.377101317582917 | 1      | 2.00E-04 | NA | NA | 0.0023 | 0 |
| NM_181453    | GCC2     | 0                  | 0.351203998182644 | 1      | 2.00E-04 | NA | NA | 0.0023 | 0 |
| NR_028063    | GCC2     | 0                  | 0.351203998182644 | 1      | 2.00E-04 | NA | NA | 0.0023 | 0 |
| NM_080840    | PTPRA    | 0                  | 0.351203998182644 | 1      | 2.00E-04 | NA | NA | 0.0023 | 0 |
| NR_046406    | TXNDC12  | 0                  | 0.351203998182644 | 1      | 2.00E-04 | NA | NA | 0.0023 | 0 |
| NM_015913    | TXNDC12  | 0                  | 0.351203998182644 | 1      | 2.00E-04 | NA | NA | 0.0023 | 0 |
| NR_046405    | TXNDC12  | 0                  | 0.351203998182644 | 1      | 2.00E-04 | NA | NA | 0.0023 | 0 |
| NM_025069    | ZNF703   | 0                  | 0.351658337119491 | 1      | 2.00E-04 | NA | NA | 0.0023 | 0 |
| NM_198393    | TEX14    | 0                  | 0.351658337119491 | 1      | 2.00E-04 | NA | NA | 0.0023 | 0 |
| NM_001201457 | TEX14    | 0                  | 0.351658337119491 | 1      | 2.00E-04 | NA | NA | 0.0023 | 0 |
| NM_031272    | TEX14    | 0                  | 0.351658337119491 | 1      | 2.00E-04 | NA | NA | 0.0023 | 0 |
| NM_144690    | ZNF582   | 0                  | 0.351658337119491 | 1      | 2.00E-04 | NA | NA | 0.0023 | 0 |
| NM_153269    | C20orf96 | 0.0213539300318037 | 0.373012267151295 | 1      | 2.00E-04 | NA | NA | 0.0023 | 0 |
| NM_080571    | C20orf96 | 0.0213539300318037 | 0.373012267151295 | 1      | 2.00E-04 | NA | NA | 0.0023 | 0 |
| NM_001161662 | WWC1     | 0                  | 0.352112676056338 | 1      | 2.00E-04 | NA | NA | 0.0023 | 0 |
| NM_001161661 | WWC1     | 0                  | 0.352112676056338 | 1      | 2.00E-04 | NA | NA | 0.0023 | 0 |
| NM_015238    | WWC1     | 0                  | 0.352112676056338 | 1      | 2.00E-04 | NA | NA | 0.0023 | 0 |
| NM_024942    | C10orf88 | 0                  | 0.352112676056338 | 1      | 2.00E-04 | NA | NA | 0.0023 | 0 |
| NM_005917    | MDH1     | 0.15765561108587   | 0.510676965015902 | 0.9998 | 2.00E-04 | NA | NA | 0.0023 | 0 |
| NM_030793    | FBXO38   | 0                  | 0.353021353930032 | 1      | 2.00E-04 | NA | NA | 0.0023 | 0 |
| NM_001271723 | FBXO38   | 0                  | 0.353021353930032 | 1      | 2.00E-04 | NA | NA | 0.0023 | 0 |
| NM_001009608 | SLX4IP   | 0                  | 0.353475692866879 | 1      | 2.00E-04 | NA | NA | 0.0023 | 0 |
| NM_181508    | HPSS     | 0                  | 0.353475692866879 | 1      | 2.00E-04 | NA | NA | 0.0023 | 0 |
| NM_181507    | HPSS     | 0                  | 0.353475692866879 | 1      | 2.00E-04 | NA | NA | 0.0023 | 0 |
| NM_007216    | HPSS     | 0                  | 0.353475692866879 | 1      | 2.00E-04 | NA | NA | 0.0023 | 0 |
| NM_001145472 | LOXHD1   | 0                  | 0.353475692866879 | 1      | 2.00E-04 | NA | NA | 0.0023 | 0 |
| NM_006309    | LRRFIP2  | 0                  | 0.353475692866879 | 1      | 2.00E-04 | NA | NA | 0.0023 | 0 |
| NM_001163380 | RAB2B    | 0.0990458882326215 | 0.452975920036347 | 1      | 2.00E-04 | NA | NA | 0.0023 | 0 |
| NM_001128626 | SPIRE1   | 0.0358927760109041 | 0.38982280781463  | 1      | 2.00E-04 | NA | NA | 0.0023 | 0 |
| NM_020148    | SPIRE1   | 0.0358927760109041 | 0.38982280781463  | 1      | 2.00E-04 | NA | NA | 0.0023 | 0 |
| NM_178127    | ANGPTL5  | 0                  | 0.353930031803726 | 1      | 2.00E-04 | NA | NA | 0.0023 | 0 |
| NM_005433    | YES1     | 0                  | 0.353930031803726 | 1      | 2.00E-04 | NA | NA | 0.0023 | 0 |
| NR_033979    | HOXD-AS1 | 0                  | 0.353930031803726 | 1      | 2.00E-04 | NA | NA | 0.0023 | 0 |
| NM_002491    | NDUFB3   | 0                  | 0.354384370740572 | 1      | 2.00E-04 | NA | NA | 0.0023 | 0 |
| NM_001257102 | NDUFB3   | 0                  | 0.354384370740572 | 1      | 2.00E-04 | NA | NA | 0.0023 | 0 |

|              |            |                    |                   |   |          |    |        |        |   |
|--------------|------------|--------------------|-------------------|---|----------|----|--------|--------|---|
| NM_212474    | FN1        | 0                  | 0.354384370740572 | 1 | 2.00E-04 | NA | NA     | 0.0023 | 0 |
| NM_054034    | FN1        | 0                  | 0.354384370740572 | 1 | 2.00E-04 | NA | NA     | 0.0023 | 0 |
| NM_002026    | FN1        | 0                  | 0.354384370740572 | 1 | 2.00E-04 | NA | NA     | 0.0023 | 0 |
| NM_212478    | FN1        | 0                  | 0.354384370740572 | 1 | 2.00E-04 | NA | NA     | 0.0023 | 0 |
| NM_212482    | FN1        | 0                  | 0.354384370740572 | 1 | 2.00E-04 | NA | NA     | 0.0023 | 0 |
| NM_212476    | FN1        | 0                  | 0.354384370740572 | 1 | 2.00E-04 | NA | NA     | 0.0023 | 0 |
| NR_026591    | RAD1       | 0                  | 0.354384370740572 | 1 | 2.00E-04 | NA | NA     | 0.0023 | 0 |
| NM_032638    | GATA2      | 0                  | 0.354838709677419 | 1 | 2.00E-04 | NA | NA     | 0.0023 | 0 |
| NR_037504    | MIR3939    | 0                  | 0.354838709677419 | 1 | 2.00E-04 | NA | NA     | 0.0023 | 0 |
| NM_032290    | ANKRD32    | 0                  | 0.355293048614266 | 1 | 2.00E-04 | NA | NA     | 0.0023 | 0 |
| NM_003742    | ABCB11     | 0                  | 0.355293048614266 | 1 | 2.00E-04 | NA | NA     | 0.0023 | 0 |
| NM_002853    | RAD1       | 0                  | 0.355293048614266 | 1 | 2.00E-04 | NA | NA     | 0.0023 | 0 |
| NM_015866    | PRDM2      | 0.0113584734211722 | 0.367105860972285 | 1 | 2.00E-04 | NA | NA     | 0.0023 | 0 |
| NM_012231    | PRDM2      | 0.0113584734211722 | 0.367105860972285 | 1 | 2.00E-04 | NA | NA     | 0.0023 | 0 |
| NR_024347    | LINCO0304  | 0.220354384370741  | 0.576101771921854 | 1 | 2.00E-04 | 1  | 0.1555 | 0.0023 | 0 |
| NM_001005163 | OR52D1     | 0                  | 0.355747387551113 | 1 | 2.00E-04 | NA | NA     | 0.0023 | 0 |
| NM_001378    | DYNC1I2    | 0                  | 0.355747387551113 | 1 | 2.00E-04 | NA | NA     | 0.0023 | 0 |
| NM_001271790 | DYNC1I2    | 0                  | 0.355747387551113 | 1 | 2.00E-04 | NA | NA     | 0.0023 | 0 |
| NM_001271788 | DYNC1I2    | 0                  | 0.355747387551113 | 1 | 2.00E-04 | NA | NA     | 0.0023 | 0 |
| NM_001271786 | DYNC1I2    | 0                  | 0.355747387551113 | 1 | 2.00E-04 | NA | NA     | 0.0023 | 0 |
| NM_025231    | ZSCAN16    | 0                  | 0.355747387551113 | 1 | 2.00E-04 | NA | NA     | 0.0023 | 0 |
| NR_047673    | LRRC4C     | 0                  | 0.355747387551113 | 1 | 2.00E-04 | NA | NA     | 0.0023 | 0 |
| NR_047674    | LRRC4C     | 0                  | 0.355747387551113 | 1 | 2.00E-04 | NA | NA     | 0.0023 | 0 |
| NM_001143985 | BANF1      | 0                  | 0.35620172648796  | 1 | 2.00E-04 | NA | NA     | 0.0023 | 0 |
| NM_003860    | BANF1      | 0                  | 0.35620172648796  | 1 | 2.00E-04 | NA | NA     | 0.0023 | 0 |
| NM_005259    | MSTN       | 0                  | 0.35620172648796  | 1 | 2.00E-04 | NA | NA     | 0.0023 | 0 |
| NM_015206    | KIAA1024   | 0                  | 0.356656065424807 | 1 | 2.00E-04 | NA | NA     | 0.0023 | 0 |
| NM_001001937 | ATPSA1     | 0                  | 0.356656065424807 | 1 | 2.00E-04 | NA | NA     | 0.0023 | 0 |
| NR_028389    | ACVR2B-AS1 | 0                  | 0.356656065424807 | 1 | 2.00E-04 | NA | NA     | 0.0023 | 0 |
| NM_001172109 | SENP8      | 0                  | 0.357110404361654 | 1 | 2.00E-04 | NA | NA     | 0.0023 | 0 |
| NR_015359    | WDFY3-AS2  | 0                  | 0.357110404361654 | 1 | 2.00E-04 | NA | NA     | 0.0023 | 0 |
| NM_173487    | C4orf33    | 0                  | 0.357110404361654 | 1 | 2.00E-04 | NA | NA     | 0.0023 | 0 |
| NM_020211    | RGMA       | 0                  | 0.357110404361654 | 1 | 2.00E-04 | NA | NA     | 0.0023 | 0 |
| NM_033266    | ERN2       | 0                  | 0.357110404361654 | 1 | 2.00E-04 | NA | NA     | 0.0023 | 0 |
| NM_001258221 | KCTD1      | 0                  | 0.357110404361654 | 1 | 2.00E-04 | NA | NA     | 0.0023 | 0 |
| NM_006639    | CYSLTR1    | 0                  | 0.357110404361654 | 1 | 2.00E-04 | NA | NA     | 0.0023 | 0 |
| NM_001282186 | CYSLTR1    | 0                  | 0.357110404361654 | 1 | 2.00E-04 | NA | NA     | 0.0023 | 0 |
| NM_001282187 | CYSLTR1    | 0                  | 0.357110404361654 | 1 | 2.00E-04 | NA | NA     | 0.0023 | 0 |
| NM_001282188 | CYSLTR1    | 0                  | 0.357110404361654 | 1 | 2.00E-04 | NA | NA     | 0.0023 | 0 |
| NM_001278170 | ZNF33A     | 0                  | 0.357564743298501 | 1 | 2.00E-04 | NA | NA     | 0.0023 | 0 |
| NM_001278173 | ZNF33A     | 0                  | 0.357564743298501 | 1 | 2.00E-04 | NA | NA     | 0.0023 | 0 |
| NM_001278174 | ZNF33A     | 0                  | 0.357564743298501 | 1 | 2.00E-04 | NA | NA     | 0.0023 | 0 |
| NM_006974    | ZNF33A     | 0                  | 0.357564743298501 | 1 | 2.00E-04 | NA | NA     | 0.0023 | 0 |
| NM_006954    | ZNF33A     | 0                  | 0.357564743298501 | 1 | 2.00E-04 | NA | NA     | 0.0023 | 0 |
| NM_001278179 | ZNF33A     | 0                  | 0.357564743298501 | 1 | 2.00E-04 | NA | NA     | 0.0023 | 0 |
| NM_001278176 | ZNF33A     | 0                  | 0.357564743298501 | 1 | 2.00E-04 | NA | NA     | 0.0023 | 0 |
| NM_001278178 | ZNF33A     | 0                  | 0.357564743298501 | 1 | 2.00E-04 | NA | NA     | 0.0023 | 0 |

|              |           |   |                   |   |          |    |    |        |          |
|--------------|-----------|---|-------------------|---|----------|----|----|--------|----------|
| NM_001278177 | ZNF33A    | 0 | 0.357564743298501 | 1 | 2.00E-04 | NA | NA | 0.0023 | 0        |
| NM_001278175 | ZNF33A    | 0 | 0.357564743298501 | 1 | 2.00E-04 | NA | NA | 0.0023 | 0        |
| NM_001278171 | ZNF33A    | 0 | 0.357564743298501 | 1 | 2.00E-04 | NA | NA | 0.0023 | 0        |
| NM_001135244 | TCOF1     | 0 | 0.358019082235348 | 1 | 2.00E-04 | NA | NA | 0.0023 | 0        |
| NM_001135245 | TCOF1     | 0 | 0.358019082235348 | 1 | 2.00E-04 | NA | NA | 0.0023 | 0        |
| NM_000356    | TCOF1     | 0 | 0.358019082235348 | 1 | 2.00E-04 | NA | NA | 0.0023 | 0        |
| NM_001195141 | TCOF1     | 0 | 0.358019082235348 | 1 | 2.00E-04 | NA | NA | 0.0023 | 0        |
| NM_001135243 | TCOF1     | 0 | 0.358019082235348 | 1 | 2.00E-04 | NA | NA | 0.0023 | 0        |
| NM_001008657 | TCOF1     | 0 | 0.358019082235348 | 1 | 2.00E-04 | NA | NA | 0.0023 | 0        |
| NM_001200047 | NMNAT3    | 0 | 0.358019082235348 | 1 | 2.00E-04 | NA | NA | 0.0023 | 0        |
| NM_178177    | NMNAT3    | 0 | 0.358019082235348 | 1 | 2.00E-04 | NA | NA | 0.0023 | 0        |
| NM_001270    | CHD1      | 0 | 0.358019082235348 | 1 | 2.00E-04 | NA | NA | 0.0023 | 0        |
| NM_001008395 | LAMTOR4   | 0 | 0.358473421172194 | 1 | 2.00E-04 | NA | NA | 0.0023 | 0        |
| NM_001012643 | MYPOP     | 0 | 0.358473421172194 | 1 | 2.00E-04 | NA | NA | 0.0023 | 0        |
| NM_001130716 | PLAC8     | 0 | 0.358473421172194 | 1 | 2.00E-04 | NA | NA | 0.0023 | 0        |
| NM_019079    | L1TD1     | 0 | 0.358927760109041 | 1 | 2.00E-04 | NA | NA | 0.0023 | 0        |
| NM_001164835 | L1TD1     | 0 | 0.358927760109041 | 1 | 2.00E-04 | NA | NA | 0.0023 | 0        |
| NM_000561    | GSTM1     | 0 | 0.358927760109041 | 1 | 2.00E-04 | NA | NA | 0.0023 | 0        |
| NM_146421    | GSTM1     | 0 | 0.358927760109041 | 1 | 2.00E-04 | NA | NA | 0.0023 | 0        |
| NM_005733    | KIF20A    | 0 | 0.358927760109041 | 1 | 2.00E-04 | NA | NA | 0.0023 | 0        |
| NR_030724    | XPNPEP1   | 0 | 0.358927760109041 | 1 | 2.00E-04 | NA | NA | 0.0023 | 0        |
| NM_020383    | XPNPEP1   | 0 | 0.358927760109041 | 1 | 2.00E-04 | NA | NA | 0.0023 | 0        |
| NM_001167604 | XPNPEP1   | 0 | 0.358927760109041 | 1 | 2.00E-04 | NA | NA | 0.0023 | 0        |
| NM_018455    | CENPN     | 0 | 0.359382099045888 | 1 | 6.00E-04 | NA | NA | 0.0099 | 1.00E-04 |
| NM_001270473 | CENPN     | 0 | 0.359382099045888 | 1 | 2.00E-04 | NA | NA | 0.0023 | 0        |
| NM_001100624 | CENPN     | 0 | 0.359382099045888 | 1 | 2.00E-04 | NA | NA | 0.0023 | 0        |
| NM_001100625 | CENPN     | 0 | 0.359382099045888 | 1 | 2.00E-04 | NA | NA | 0.0023 | 0        |
| NM_001270474 | CENPN     | 0 | 0.359382099045888 | 1 | 2.00E-04 | NA | NA | 0.0023 | 0        |
| NR_002987    | SNORA61   | 0 | 0.359382099045888 | 1 | 2.00E-04 | NA | NA | 0.0023 | 0        |
| NM_001243728 | ATPAF1    | 0 | 0.359382099045888 | 1 | 2.00E-04 | NA | NA | 0.0023 | 0        |
| NM_001256418 | ATPAF1    | 0 | 0.359382099045888 | 1 | 2.00E-04 | NA | NA | 0.0023 | 0        |
| NM_001174129 | SLC11A2   | 0 | 0.359382099045888 | 1 | 2.00E-04 | NA | NA | 0.0023 | 0        |
| NR_037449    | MIR3678   | 0 | 0.359836437982735 | 1 | 2.00E-04 | NA | NA | 0.0023 | 0        |
| NM_182899    | CREB5     | 0 | 0.359836437982735 | 1 | 2.00E-04 | NA | NA | 0.0023 | 0        |
| NR_026826    | INTS9     | 0 | 0.359836437982735 | 1 | 2.00E-04 | NA | NA | 0.0023 | 0        |
| NM_018250    | INTS9     | 0 | 0.359836437982735 | 1 | 2.00E-04 | NA | NA | 0.0023 | 0        |
| NM_001145159 | INTS9     | 0 | 0.359836437982735 | 1 | 2.00E-04 | NA | NA | 0.0023 | 0        |
| NM_018161    | NADSYN1   | 0 | 0.360290776919582 | 1 | 6.00E-04 | NA | NA | 0.0099 | 1.00E-04 |
| NM_003509    | HIST1H2AI | 0 | 0.360290776919582 | 1 | 2.00E-04 | NA | NA | 0.0023 | 0        |
| NM_006368    | CREB3     | 0 | 0.360290776919582 | 1 | 2.00E-04 | NA | NA | 0.0023 | 0        |
| NM_001284277 | PITPNB    | 0 | 0.360290776919582 | 1 | 2.00E-04 | NA | NA | 0.0023 | 0        |
| NM_012399    | PITPNB    | 0 | 0.360290776919582 | 1 | 2.00E-04 | NA | NA | 0.0023 | 0        |
| NM_001136053 | TPRA1     | 0 | 0.360290776919582 | 1 | 2.00E-04 | NA | NA | 0.0023 | 0        |
| NM_001142646 | TPRA1     | 0 | 0.360290776919582 | 1 | 2.00E-04 | NA | NA | 0.0023 | 0        |
| NR_073377    | TPRA1     | 0 | 0.360290776919582 | 1 | 2.00E-04 | NA | NA | 0.0023 | 0        |
| NM_016484    | PDZD11    | 0 | 0.360290776919582 | 1 | 2.00E-04 | NA | NA | 0.0023 | 0        |
| NM_001098625 | JKAMP     | 0 | 0.360745115856429 | 1 | 2.00E-04 | NA | NA | 0.0023 | 0        |



|              |           |                    |                   |        |          |    |    |        |          |
|--------------|-----------|--------------------|-------------------|--------|----------|----|----|--------|----------|
| NM_001284201 | JKAMP     | 0                  | 0.360745115856429 | 1      | 2.00E-04 | NA | NA | 0.0023 | 0        |
| NM_001284202 | JKAMP     | 0                  | 0.360745115856429 | 1      | 2.00E-04 | NA | NA | 0.0023 | 0        |
| NM_001284203 | JKAMP     | 0                  | 0.360745115856429 | 1      | 2.00E-04 | NA | NA | 0.0023 | 0        |
| NM_001284204 | JKAMP     | 0                  | 0.360745115856429 | 1      | 2.00E-04 | NA | NA | 0.0023 | 0        |
| NM_016475    | JKAMP     | 0                  | 0.360745115856429 | 1      | 2.00E-04 | NA | NA | 0.0023 | 0        |
| NR_003574    | ABCA17P   | 0                  | 0.360745115856429 | 1      | 2.00E-04 | NA | NA | 0.0023 | 0        |
| NR_003679    | HAND2-AS1 | 0                  | 0.360745115856429 | 1      | 2.00E-04 | NA | NA | 0.0023 | 0        |
| NM_002354    | EPCAM     | 0.0204452521581099 | 0.381190368014539 | 1      | 2.00E-04 | NA | NA | 0.0023 | 0        |
| NR_024605    | EFCAB1    | 0.0831440254429805 | 0.444343480236256 | 1      | 2.00E-04 | NA | NA | 0.0023 | 0        |
| NM_001142857 | EFCAB1    | 0.0831440254429805 | 0.444343480236256 | 1      | 2.00E-04 | NA | NA | 0.0023 | 0        |
| NM_024593    | EFCAB1    | 0.0831440254429805 | 0.444343480236256 | 1      | 2.00E-04 | NA | NA | 0.0023 | 0        |
| NM_001018138 | NME2      | 0                  | 0.361199454793276 | 1      | 2.00E-04 | NA | NA | 0.0023 | 0        |
| NR_040058    | RAD51-AS1 | 0                  | 0.361199454793276 | 1      | 2.00E-04 | NA | NA | 0.0023 | 0        |
| NM_001170538 | DZIP1L    | 0                  | 0.361199454793276 | 1      | 2.00E-04 | NA | NA | 0.0023 | 0        |
| NM_003126    | SPTA1     | 0                  | 0.361653793730123 | 1      | 2.00E-04 | NA | NA | 0.0023 | 0        |
| NM_001005920 | JMJD8     | 0                  | 0.361653793730123 | 1      | 2.00E-04 | NA | NA | 0.0023 | 0        |
| NM_032511    | FAXC      | 0                  | 0.361653793730123 | 1      | 2.00E-04 | NA | NA | 0.0023 | 0        |
| NM_005430    | WNT1      | 0                  | 0.36210813266697  | 1      | 2.00E-04 | NA | NA | 0.0023 | 0        |
| NM_001166131 | EME1      | 0                  | 0.36210813266697  | 1      | 2.00E-04 | NA | NA | 0.0023 | 0        |
| NM_152463    | EME1      | 0                  | 0.36210813266697  | 1      | 2.00E-04 | NA | NA | 0.0023 | 0        |
| NM_002228    | JUN       | 0                  | 0.36210813266697  | 1      | 2.00E-04 | NA | NA | 0.0023 | 0        |
| NM_001243597 | CDON      | 0                  | 0.363016810540663 | 1      | 2.00E-04 | NA | NA | 0.0023 | 0        |
| NM_016952    | CDON      | 0                  | 0.363016810540663 | 1      | 2.00E-04 | NA | NA | 0.0023 | 0        |
| NM_181844    | BCL6B     | 0                  | 0.36347114947751  | 1      | 2.00E-04 | NA | NA | 0.0023 | 0        |
| NM_001199456 | BRD2      | 0                  | 0.36347114947751  | 1      | 2.00E-04 | NA | NA | 0.0023 | 0        |
| NM_016378    | VCX2      | 0                  | 0.36347114947751  | 1      | 2.00E-04 | NA | NA | 0.0023 | 0        |
| NM_018326    | GIMAP4    | 0                  | 0.363925488414357 | 1      | 2.00E-04 | NA | NA | 0.0023 | 0        |
| NM_001282707 | PDIA6     | 0                  | 0.363925488414357 | 1      | 2.00E-04 | NA | NA | 0.0023 | 0        |
| NM_005742    | PDIA6     | 0                  | 0.363925488414357 | 1      | 2.00E-04 | NA | NA | 0.0023 | 0        |
| NM_005255    | GAK       | 0                  | 0.363925488414357 | 1      | 2.00E-04 | NA | NA | 0.0023 | 0        |
| NM_021189    | CADM3     | 0                  | 0.364379827351204 | 1      | 2.00E-04 | NA | NA | 0.0023 | 0        |
| NM_001127173 | CADM3     | 0                  | 0.364379827351204 | 1      | 2.00E-04 | NA | NA | 0.0023 | 0        |
| NM_004731    | SLC16A7   | 0                  | 0.364379827351204 | 1      | 2.00E-04 | NA | NA | 0.0023 | 0        |
| NR_073056    | SLC16A7   | 0                  | 0.364379827351204 | 1      | 2.00E-04 | NA | NA | 0.0023 | 0        |
| NR_073055    | SLC16A7   | 0                  | 0.364379827351204 | 1      | 2.00E-04 | NA | NA | 0.0023 | 0        |
| NM_007276    | CBX3      | 0                  | 0.364379827351204 | 0.9998 | 0.001    | NA | NA | 0.0099 | 2.00E-04 |
| NM_014872    | ZBTB5     | 0                  | 0.364379827351204 | 1      | 2.00E-04 | NA | NA | 0.0023 | 0        |
| NM_002435    | MPI       | 0                  | 0.364834166288051 | 1      | 2.00E-04 | NA | NA | 0.0023 | 0        |
| NM_005378    | MYCN      | 0                  | 0.364834166288051 | 1      | 2.00E-04 | NA | NA | 0.0023 | 0        |
| NM_015052    | HECW1     | 0                  | 0.364834166288051 | 1      | 2.00E-04 | NA | NA | 0.0023 | 0        |
| NM_058240    | SLC8A3    | 0                  | 0.364834166288051 | 1      | 2.00E-04 | NA | NA | 0.0023 | 0        |
| NM_183002    | SLC8A3    | 0                  | 0.364834166288051 | 1      | 2.00E-04 | NA | NA | 0.0023 | 0        |
| NM_033262    | SLC8A3    | 0                  | 0.364834166288051 | 1      | 2.00E-04 | NA | NA | 0.0023 | 0        |
| NR_104122    | SLC8A3    | 0                  | 0.364834166288051 | 1      | 2.00E-04 | NA | NA | 0.0023 | 0        |
| NM_182932    | SLC8A3    | 0                  | 0.364834166288051 | 1      | 2.00E-04 | NA | NA | 0.0023 | 0        |
| NM_174858    | AK5       | 0.0795093139482054 | 0.444797819173103 | 1      | 2.00E-04 | NA | NA | 0.0023 | 0        |
| NR_030173    | MIR432    | 0.115402089959109  | 0.480690595184007 | 1      | 2.00E-04 | NA | NA | 0.0023 | 0        |

|              |                   |                    |                   |        |          |    |    |        |          |
|--------------|-------------------|--------------------|-------------------|--------|----------|----|----|--------|----------|
| NM_001145132 | <i>C5orf52</i>    | 0                  | 0.365288505224898 | 1      | 2.00E-04 | NA | NA | 0.0023 | 0        |
| NM_001122964 | <i>SMEK2</i>      | 0                  | 0.365288505224898 | 1      | 2.00E-04 | NA | NA | 0.0023 | 0        |
| NM_001282850 | <i>SMEK2</i>      | 0                  | 0.365288505224898 | 1      | 2.00E-04 | NA | NA | 0.0023 | 0        |
| NM_020463    | <i>SMEK2</i>      | 0                  | 0.365288505224898 | 1      | 2.00E-04 | NA | NA | 0.0023 | 0        |
| NM_033176    | <i>NKX2-4</i>     | 0                  | 0.365288505224898 | 1      | 2.00E-04 | NA | NA | 0.0023 | 0        |
| NM_022977    | <i>ACSL4</i>      | 0                  | 0.365288505224898 | 1      | 2.00E-04 | NA | NA | 0.0023 | 0        |
| NM_004458    | <i>ACSL4</i>      | 0                  | 0.365288505224898 | 1      | 2.00E-04 | NA | NA | 0.0023 | 0        |
| NM_004316    | <i>ASCL1</i>      | 0                  | 0.365742844161745 | 1      | 2.00E-04 | NA | NA | 0.0023 | 0        |
| NM_001426    | <i>EN1</i>        | 0                  | 0.365742844161745 | 1      | 2.00E-04 | NA | NA | 0.0023 | 0        |
| NR_026575    | <i>GK3P</i>       | 0.0840527033166742 | 0.450249886415266 | 1      | 2.00E-04 | NA | NA | 0.0023 | 0        |
| NM_144719    | <i>CCDC13</i>     | 0                  | 0.366197183098592 | 1      | 2.00E-04 | NA | NA | 0.0023 | 0        |
| NM_024091    | <i>FASTKD3</i>    | 0                  | 0.366197183098592 | 1      | 2.00E-04 | NA | NA | 0.0023 | 0        |
| NR_036553    | <i>FASTKD3</i>    | 0                  | 0.366197183098592 | 1      | 2.00E-04 | NA | NA | 0.0023 | 0        |
| NR_073608    | <i>FASTKD3</i>    | 0                  | 0.366197183098592 | 1      | 2.00E-04 | NA | NA | 0.0023 | 0        |
| NM_001713    | <i>BHMT</i>       | 0                  | 0.366651522035438 | 1      | 2.00E-04 | NA | NA | 0.0023 | 0        |
| NM_002250    | <i>KCNN4</i>      | 0                  | 0.366651522035438 | 1      | 2.00E-04 | NA | NA | 0.0023 | 0        |
| NR_073599    | <i>ZNF142</i>     | 0                  | 0.366651522035438 | 1      | 2.00E-04 | NA | NA | 0.0023 | 0        |
| NM_024665    | <i>TBL1XR1</i>    | 0                  | 0.366651522035438 | 1      | 2.00E-04 | NA | NA | 0.0023 | 0        |
| NM_000367    | <i>TPMT</i>       | 0                  | 0.366651522035438 | 1      | 2.00E-04 | NA | NA | 0.0023 | 0        |
| NM_001168467 | <i>MAP7D2</i>     | 0.0563380281690141 | 0.422989550204453 | 1      | 2.00E-04 | NA | NA | 0.0023 | 0        |
| NM_152376    | <i>UBXN10</i>     | 0                  | 0.367105860972285 | 1      | 2.00E-04 | NA | NA | 0.0023 | 0        |
| NM_152594    | <i>SPRED1</i>     | 0                  | 0.367105860972285 | 1      | 2.00E-04 | NA | NA | 0.0023 | 0        |
| NM_178539    | <i>FAM19A2</i>    | 0                  | 0.367105860972285 | 1      | 2.00E-04 | NA | NA | 0.0023 | 0        |
| NM_133499    | <i>SYN1</i>       | 0                  | 0.367105860972285 | 1      | 2.00E-04 | NA | NA | 0.0023 | 0        |
| NM_006950    | <i>SYN1</i>       | 0                  | 0.367105860972285 | 1      | 2.00E-04 | NA | NA | 0.0023 | 0        |
| NM_004623    | <i>TTC4</i>       | 0                  | 0.367560199909132 | 1      | 2.00E-04 | NA | NA | 0.0023 | 0        |
| NM_004048    | <i>B2M</i>        | 0                  | 0.367560199909132 | 1      | 2.00E-04 | NA | NA | 0.0023 | 0        |
| NM_144721    | <i>THAP6</i>      | 0                  | 0.367560199909132 | 1      | 2.00E-04 | NA | NA | 0.0023 | 0        |
| NM_000879    | <i>IL5</i>        | 0                  | 0.367560199909132 | 1      | 2.00E-04 | NA | NA | 0.0023 | 0        |
| NM_181689    | <i>NNAT</i>       | 0                  | 0.368014538845979 | 1      | 2.00E-04 | NA | NA | 0.0023 | 0        |
| NM_005386    | <i>NNAT</i>       | 0                  | 0.368014538845979 | 1      | 2.00E-04 | NA | NA | 0.0023 | 0        |
| NM_001171811 | <i>GBA</i>        | 0                  | 0.368014538845979 | 1      | 2.00E-04 | NA | NA | 0.0023 | 0        |
| NM_001005742 | <i>GBA</i>        | 0                  | 0.368014538845979 | 1      | 2.00E-04 | NA | NA | 0.0023 | 0        |
| NM_001005741 | <i>GBA</i>        | 0                  | 0.368014538845979 | 1      | 2.00E-04 | NA | NA | 0.0023 | 0        |
| NM_001195129 | <i>PRSS56</i>     | 0                  | 0.368468877782826 | 1      | 2.00E-04 | NA | NA | 0.0023 | 0        |
| NM_006814    | <i>PSMF1</i>      | 0                  | 0.368468877782826 | 1      | 2.00E-04 | NA | NA | 0.0023 | 0        |
| NM_019888    | <i>MC3R</i>       | 0                  | 0.368468877782826 | 1      | 2.00E-04 | NA | NA | 0.0023 | 0        |
| NM_001033059 | <i>AMD1</i>       | 0                  | 0.368468877782826 | 1      | 2.00E-04 | NA | NA | 0.0023 | 0        |
| NM_178454    | <i>DRAM2</i>      | 0                  | 0.368468877782826 | 1      | 2.00E-04 | NA | NA | 0.0023 | 0        |
| NM_139265    | <i>EHD4</i>       | 0                  | 0.368468877782826 | 1      | 2.00E-04 | NA | NA | 0.0023 | 0        |
| NM_001139459 | <i>CNST</i>       | 0                  | 0.368923216719673 | 1      | 2.00E-04 | NA | NA | 0.0023 | 0        |
| NM_152609    | <i>CNST</i>       | 0                  | 0.368923216719673 | 1      | 2.00E-04 | NA | NA | 0.0023 | 0        |
| NM_001634    | <i>AMD1</i>       | 0                  | 0.368923216719673 | 1      | 2.00E-04 | NA | NA | 0.0023 | 0        |
| NM_001242393 | <i>ACSS2</i>      | 0                  | 0.36937755565652  | 1      | 2.00E-04 | NA | NA | 0.0023 | 0        |
| NM_052928    | <i>SMYD4</i>      | 0                  | 0.36937755565652  | 1      | 2.00E-04 | NA | NA | 0.0023 | 0        |
| NM_030965    | <i>ST6GALNAC5</i> | 0.0690595184007269 | 0.438891412994094 | 0.9972 | 0.0052   | NA | NA | 0.0458 | 9.00E-04 |
| NM_018179    | <i>ATF7IP</i>     | 0                  | 0.370286233530214 | 1      | 2.00E-04 | NA | NA | 0.0023 | 0        |

|              |           |                   |                   |   |          |    |    |        |          |
|--------------|-----------|-------------------|-------------------|---|----------|----|----|--------|----------|
| NR_036652    | EFTUD1P1  | 0                 | 0.370286233530214 | 1 | 2.00E-04 | NA | NA | 0.0023 | 0        |
| NM_001199514 | TGIF2     | 0                 | 0.370286233530214 | 1 | 2.00E-04 | NA | NA | 0.0023 | 0        |
| NM_001199513 | TGIF2     | 0                 | 0.370286233530214 | 1 | 2.00E-04 | NA | NA | 0.0023 | 0        |
| NM_021809    | TGIF2     | 0                 | 0.370286233530214 | 1 | 2.00E-04 | NA | NA | 0.0023 | 0        |
| NM_001029854 | PDE8B     | 0                 | 0.370286233530214 | 1 | 2.00E-04 | NA | NA | 0.0023 | 0        |
| NM_001029851 | PDE8B     | 0                 | 0.370286233530214 | 1 | 2.00E-04 | NA | NA | 0.0023 | 0        |
| NM_001029853 | PDE8B     | 0                 | 0.370286233530214 | 1 | 2.00E-04 | NA | NA | 0.0023 | 0        |
| NM_001029852 | PDE8B     | 0                 | 0.370286233530214 | 1 | 2.00E-04 | NA | NA | 0.0023 | 0        |
| NM_003719    | PDE8B     | 0                 | 0.370286233530214 | 1 | 2.00E-04 | NA | NA | 0.0023 | 0        |
| NM_001167830 | TMED5     | 0                 | 0.370286233530214 | 1 | 2.00E-04 | NA | NA | 0.0023 | 0        |
| NM_016040    | TMED5     | 0                 | 0.370286233530214 | 1 | 2.00E-04 | NA | NA | 0.0023 | 0        |
| NR_030761    | TMED5     | 0                 | 0.370286233530214 | 1 | 2.00E-04 | NA | NA | 0.0023 | 0        |
| NM_003893    | LDB1      | 0                 | 0.370286233530214 | 1 | 2.00E-04 | NA | NA | 0.0023 | 0        |
| NM_020983    | ADCY6     | 0                 | 0.370286233530214 | 1 | 2.00E-04 | NA | NA | 0.0023 | 0        |
| NM_173500    | TTBK2     | 0                 | 0.370286233530214 | 1 | 0.0016   | NA | NA | 0.0183 | 3.00E-04 |
| NM_005531    | IFI16     | 0                 | 0.37074057246706  | 1 | 2.00E-04 | NA | NA | 0.0023 | 0        |
| NM_001206567 | IFI16     | 0                 | 0.37074057246706  | 1 | 2.00E-04 | NA | NA | 0.0023 | 0        |
| NM_207303    | ATRNL1    | 0                 | 0.37074057246706  | 1 | 2.00E-04 | NA | NA | 0.0023 | 0        |
| NM_001276282 | ATRNL1    | 0                 | 0.37074057246706  | 1 | 2.00E-04 | NA | NA | 0.0023 | 0        |
| NR_074088    | ATRNL1    | 0                 | 0.37074057246706  | 1 | 2.00E-04 | NA | NA | 0.0023 | 0        |
| NM_005222    | DLX6      | 0                 | 0.37074057246706  | 1 | 2.00E-04 | NA | NA | 0.0023 | 0        |
| NM_001079900 | SPACA5B   | 0                 | 0.37074057246706  | 1 | 2.00E-04 | NA | NA | 0.0023 | 0        |
| NM_006671    | SLC1A7    | 0                 | 0.37074057246706  | 1 | 2.00E-04 | NA | NA | 0.0023 | 0        |
| NM_005049    | PWP2      | 0                 | 0.371194911403907 | 1 | 2.00E-04 | NA | NA | 0.0023 | 0        |
| NR_038927    | DDX11-AS1 | 0                 | 0.371194911403907 | 1 | 2.00E-04 | NA | NA | 0.0023 | 0        |
| NM_002583    | PAWR      | 0                 | 0.371194911403907 | 1 | 2.00E-04 | NA | NA | 0.0023 | 0        |
| NM_018908    | PCDHA5    | 0.164470695138573 | 0.535665606542481 | 1 | 2.00E-04 | NA | NA | 0.0023 | 0        |
| NM_031501    | PCDHA5    | 0.164470695138573 | 0.535665606542481 | 1 | 2.00E-04 | NA | NA | 0.0023 | 0        |
| NM_001129829 | CACNA1C   | 0                 | 0.371649250340754 | 1 | 2.00E-04 | NA | NA | 0.0023 | 0        |
| NM_001129840 | CACNA1C   | 0                 | 0.371649250340754 | 1 | 2.00E-04 | NA | NA | 0.0023 | 0        |
| NM_001129841 | CACNA1C   | 0                 | 0.371649250340754 | 1 | 2.00E-04 | NA | NA | 0.0023 | 0        |
| NM_001129831 | CACNA1C   | 0                 | 0.371649250340754 | 1 | 2.00E-04 | NA | NA | 0.0023 | 0        |
| NM_001129827 | CACNA1C   | 0                 | 0.371649250340754 | 1 | 2.00E-04 | NA | NA | 0.0023 | 0        |
| NM_000719    | CACNA1C   | 0                 | 0.371649250340754 | 1 | 2.00E-04 | NA | NA | 0.0023 | 0        |
| NM_001129832 | CACNA1C   | 0                 | 0.371649250340754 | 1 | 2.00E-04 | NA | NA | 0.0023 | 0        |
| NM_001129844 | CACNA1C   | 0                 | 0.371649250340754 | 1 | 2.00E-04 | NA | NA | 0.0023 | 0        |
| NM_001167625 | CACNA1C   | 0                 | 0.371649250340754 | 1 | 2.00E-04 | NA | NA | 0.0023 | 0        |
| NM_001129830 | CACNA1C   | 0                 | 0.371649250340754 | 1 | 2.00E-04 | NA | NA | 0.0023 | 0        |
| NM_001129843 | CACNA1C   | 0                 | 0.371649250340754 | 1 | 2.00E-04 | NA | NA | 0.0023 | 0        |
| NM_001129842 | CACNA1C   | 0                 | 0.371649250340754 | 1 | 2.00E-04 | NA | NA | 0.0023 | 0        |
| NM_001129834 | CACNA1C   | 0                 | 0.371649250340754 | 1 | 2.00E-04 | NA | NA | 0.0023 | 0        |
| NM_001129838 | CACNA1C   | 0                 | 0.371649250340754 | 1 | 2.00E-04 | NA | NA | 0.0023 | 0        |
| NM_001129837 | CACNA1C   | 0                 | 0.371649250340754 | 1 | 2.00E-04 | NA | NA | 0.0023 | 0        |
| NM_001129833 | CACNA1C   | 0                 | 0.371649250340754 | 1 | 2.00E-04 | NA | NA | 0.0023 | 0        |
| NM_001129846 | CACNA1C   | 0                 | 0.371649250340754 | 1 | 2.00E-04 | NA | NA | 0.0023 | 0        |
| NM_001167623 | CACNA1C   | 0                 | 0.371649250340754 | 1 | 2.00E-04 | NA | NA | 0.0023 | 0        |
| NM_001129839 | CACNA1C   | 0                 | 0.371649250340754 | 1 | 2.00E-04 | NA | NA | 0.0023 | 0        |

|              |          |   |                   |   |          |    |    |        |   |
|--------------|----------|---|-------------------|---|----------|----|----|--------|---|
| NM_001167624 | CACNA1C  | 0 | 0.371649250340754 | 1 | 2.00E-04 | NA | NA | 0.0023 | 0 |
| NM_001129836 | CACNA1C  | 0 | 0.371649250340754 | 1 | 2.00E-04 | NA | NA | 0.0023 | 0 |
| NM_001129835 | CACNA1C  | 0 | 0.371649250340754 | 1 | 2.00E-04 | NA | NA | 0.0023 | 0 |
| NM_199460    | CACNA1C  | 0 | 0.371649250340754 | 1 | 2.00E-04 | NA | NA | 0.0023 | 0 |
| NM_000851    | GSTM5    | 0 | 0.372103589277601 | 1 | 2.00E-04 | NA | NA | 0.0023 | 0 |
| NM_001199268 | DGKZ     | 0 | 0.372103589277601 | 1 | 2.00E-04 | NA | NA | 0.0023 | 0 |
| NM_003646    | DGKZ     | 0 | 0.372103589277601 | 1 | 2.00E-04 | NA | NA | 0.0023 | 0 |
| NM_001199267 | DGKZ     | 0 | 0.372103589277601 | 1 | 2.00E-04 | NA | NA | 0.0023 | 0 |
| NM_001199266 | DGKZ     | 0 | 0.372103589277601 | 1 | 2.00E-04 | NA | NA | 0.0023 | 0 |
| NM_198219    | ING1     | 0 | 0.372103589277601 | 1 | 2.00E-04 | NA | NA | 0.0023 | 0 |
| NM_198218    | ING1     | 0 | 0.372103589277601 | 1 | 2.00E-04 | NA | NA | 0.0023 | 0 |
| NM_153354    | TMEM161B | 0 | 0.372557928214448 | 1 | 2.00E-04 | NA | NA | 0.0023 | 0 |
| NM_001145928 | SAP130   | 0 | 0.373012267151295 | 1 | 2.00E-04 | NA | NA | 0.0023 | 0 |
| NM_024545    | SAP130   | 0 | 0.373012267151295 | 1 | 2.00E-04 | NA | NA | 0.0023 | 0 |
| NM_017935    | BANK1    | 0 | 0.373466606088142 | 1 | 2.00E-04 | NA | NA | 0.0023 | 0 |
| NM_001127507 | BANK1    | 0 | 0.373466606088142 | 1 | 2.00E-04 | NA | NA | 0.0023 | 0 |
| NM_001105563 | CCHCR1   | 0 | 0.373466606088142 | 1 | 2.00E-04 | NA | NA | 0.0023 | 0 |
| NM_001105564 | CCHCR1   | 0 | 0.373466606088142 | 1 | 2.00E-04 | NA | NA | 0.0023 | 0 |
| NM_019052    | CCHCR1   | 0 | 0.373466606088142 | 1 | 2.00E-04 | NA | NA | 0.0023 | 0 |
| NM_001126181 | NRGN     | 0 | 0.373920945024989 | 1 | 2.00E-04 | NA | NA | 0.0023 | 0 |
| NM_006176    | NRGN     | 0 | 0.373920945024989 | 1 | 2.00E-04 | NA | NA | 0.0023 | 0 |
| NM_004503    | HOXC6    | 0 | 0.373920945024989 | 1 | 2.00E-04 | NA | NA | 0.0023 | 0 |
| NM_006612    | KIF1C    | 0 | 0.373920945024989 | 1 | 2.00E-04 | NA | NA | 0.0023 | 0 |
| NM_001146688 | KDM3A    | 0 | 0.373920945024989 | 1 | 2.00E-04 | NA | NA | 0.0023 | 0 |
| NM_001526    | HCRTR2   | 0 | 0.373920945024989 | 1 | 2.00E-04 | NA | NA | 0.0023 | 0 |
| NM_016612    | SLC25A37 | 0 | 0.373920945024989 | 1 | 2.00E-04 | NA | NA | 0.0023 | 0 |
| NM_018518    | MCM10    | 0 | 0.374375283961836 | 1 | 2.00E-04 | NA | NA | 0.0023 | 0 |
| NM_182751    | MCM10    | 0 | 0.374375283961836 | 1 | 2.00E-04 | NA | NA | 0.0023 | 0 |
| NM_024335    | IRX6     | 0 | 0.374375283961836 | 1 | 2.00E-04 | NA | NA | 0.0023 | 0 |
| NM_175063    | EMC10    | 0 | 0.374375283961836 | 1 | 2.00E-04 | NA | NA | 0.0023 | 0 |
| NM_206538    | EMC10    | 0 | 0.374375283961836 | 1 | 2.00E-04 | NA | NA | 0.0023 | 0 |
| NM_012304    | FBXL7    | 0 | 0.374375283961836 | 1 | 2.00E-04 | NA | NA | 0.0023 | 0 |
| NM_152779    | GLIPR1L1 | 0 | 0.374829622898682 | 1 | 2.00E-04 | NA | NA | 0.0023 | 0 |
| NM_014674    | EDEM1    | 0 | 0.374829622898682 | 1 | 2.00E-04 | NA | NA | 0.0023 | 0 |
| NM_005651    | TDO2     | 0 | 0.374829622898682 | 1 | 2.00E-04 | NA | NA | 0.0023 | 0 |
| NM_003427    | ZNF76    | 0 | 0.374829622898682 | 1 | 2.00E-04 | NA | NA | 0.0023 | 0 |
| NM_001100391 | RALYL    | 0 | 0.374829622898682 | 1 | 2.00E-04 | NA | NA | 0.0023 | 0 |
| NM_025082    | CENPT    | 0 | 0.374829622898682 | 1 | 2.00E-04 | NA | NA | 0.0023 | 0 |
| NM_175875    | SIX5     | 0 | 0.374829622898682 | 1 | 2.00E-04 | NA | NA | 0.0023 | 0 |
| NM_001270614 | DEDD2    | 0 | 0.375283961835529 | 1 | 2.00E-04 | NA | NA | 0.0023 | 0 |
| NR_073047    | DEDD2    | 0 | 0.375283961835529 | 1 | 2.00E-04 | NA | NA | 0.0023 | 0 |
| NM_178175    | LHFPL1   | 0 | 0.375738300772376 | 1 | 2.00E-04 | NA | NA | 0.0023 | 0 |
| NM_006410    | HTATIP2  | 0 | 0.376192639709223 | 1 | 2.00E-04 | NA | NA | 0.0023 | 0 |
| NM_001098521 | HTATIP2  | 0 | 0.376192639709223 | 1 | 2.00E-04 | NA | NA | 0.0023 | 0 |
| NM_001098520 | HTATIP2  | 0 | 0.376192639709223 | 1 | 2.00E-04 | NA | NA | 0.0023 | 0 |
| NM_001098523 | HTATIP2  | 0 | 0.376192639709223 | 1 | 2.00E-04 | NA | NA | 0.0023 | 0 |
| NM_001098522 | HTATIP2  | 0 | 0.376192639709223 | 1 | 2.00E-04 | NA | NA | 0.0023 | 0 |

|              |           |                     |                   |        |          |    |    |        |   |
|--------------|-----------|---------------------|-------------------|--------|----------|----|----|--------|---|
| NM_012183    | FOXD3     | 0.0831440254429805  | 0.459336665152204 | 1      | 2.00E-04 | NA | NA | 0.0023 | 0 |
| NM_001282351 | FBXL19    | 0                   | 0.37664697864607  | 1      | 2.00E-04 | NA | NA | 0.0023 | 0 |
| NM_001086    | AADAC     | 0                   | 0.37664697864607  | 1      | 2.00E-04 | NA | NA | 0.0023 | 0 |
| NR_001297    | PCDHGB8P  | 0                   | 0.37664697864607  | 1      | 2.00E-04 | NA | NA | 0.0023 | 0 |
| NM_005619    | RTN2      | 0                   | 0.37664697864607  | 1      | 2.00E-04 | NA | NA | 0.0023 | 0 |
| NM_206900    | RTN2      | 0                   | 0.37664697864607  | 1      | 2.00E-04 | NA | NA | 0.0023 | 0 |
| NM_080874    | ASB5      | 0                   | 0.37664697864607  | 1      | 2.00E-04 | NA | NA | 0.0023 | 0 |
| NR_026553    | LINC00161 | 0                   | 0.377555656519764 | 1      | 2.00E-04 | NA | NA | 0.0023 | 0 |
| NR_026552    | LINC00161 | 0                   | 0.377555656519764 | 1      | 2.00E-04 | NA | NA | 0.0023 | 0 |
| NM_012192    | TIMM10B   | 0.116310767832803   | 0.494320763289414 | 0.9998 | 2.00E-04 | NA | NA | 0.0023 | 0 |
| NM_001252273 | FAM69A    | 0                   | 0.378009995456611 | 1      | 2.00E-04 | NA | NA | 0.0023 | 0 |
| NM_001252270 | FAM69A    | 0                   | 0.378009995456611 | 1      | 2.00E-04 | NA | NA | 0.0023 | 0 |
| NM_001252269 | FAM69A    | 0                   | 0.378009995456611 | 1      | 2.00E-04 | NA | NA | 0.0023 | 0 |
| NM_001006605 | FAM69A    | 0                   | 0.378009995456611 | 1      | 2.00E-04 | NA | NA | 0.0023 | 0 |
| NM_001271865 | KLHDC8A   | 0                   | 0.378009995456611 | 1      | 2.00E-04 | NA | NA | 0.0023 | 0 |
| NM_001271864 | KLHDC8A   | 0                   | 0.378009995456611 | 1      | 2.00E-04 | NA | NA | 0.0023 | 0 |
| NM_001271863 | KLHDC8A   | 0                   | 0.378009995456611 | 1      | 2.00E-04 | NA | NA | 0.0023 | 0 |
| NM_148919    | PSMB8     | 0                   | 0.378009995456611 | 1      | 2.00E-04 | NA | NA | 0.0023 | 0 |
| NM_007026    | DUSP14    | 0                   | 0.378464334393458 | 1      | 2.00E-04 | NA | NA | 0.0023 | 0 |
| NM_024426    | WT1       | 0                   | 0.378464334393458 | 1      | 2.00E-04 | NA | NA | 0.0023 | 0 |
| NM_000378    | WT1       | 0                   | 0.378464334393458 | 1      | 2.00E-04 | NA | NA | 0.0023 | 0 |
| NM_024424    | WT1       | 0                   | 0.378464334393458 | 1      | 2.00E-04 | NA | NA | 0.0023 | 0 |
| NM_173812    | DPY19L2   | 0                   | 0.378464334393458 | 1      | 2.00E-04 | NA | NA | 0.0023 | 0 |
| NR_034002    | MCF2L-AS1 | 0                   | 0.378464334393458 | 1      | 2.00E-04 | NA | NA | 0.0023 | 0 |
| NM_005548    | KARS      | 0                   | 0.378464334393458 | 1      | 2.00E-04 | NA | NA | 0.0023 | 0 |
| NM_001130089 | KARS      | 0                   | 0.378464334393458 | 1      | 2.00E-04 | NA | NA | 0.0023 | 0 |
| NM_002356    | MARCKS    | 0                   | 0.378918673330304 | 1      | 2.00E-04 | NA | NA | 0.0023 | 0 |
| NM_178007    | STARD13   | 0                   | 0.378918673330304 | 1      | 2.00E-04 | NA | NA | 0.0023 | 0 |
| NM_001243466 | STARD13   | 0                   | 0.378918673330304 | 1      | 2.00E-04 | NA | NA | 0.0023 | 0 |
| NM_004764    | PIWIL1    | 0                   | 0.379373012267151 | 1      | 2.00E-04 | NA | NA | 0.0023 | 0 |
| NM_001190971 | PIWIL1    | 0                   | 0.379373012267151 | 1      | 2.00E-04 | NA | NA | 0.0023 | 0 |
| NM_001113493 | 40057     | 0                   | 0.379373012267151 | 1      | 2.00E-04 | NA | NA | 0.0023 | 0 |
| NR_002731    | HYALP1    | 0.00999545661063153 | 0.389368468877783 | 1      | 2.00E-04 | NA | NA | 0.0023 | 0 |
| NM_001040126 | PQLC2     | 0                   | 0.379827351203998 | 1      | 2.00E-04 | NA | NA | 0.0023 | 0 |
| NM_001040125 | PQLC2     | 0                   | 0.379827351203998 | 1      | 2.00E-04 | NA | NA | 0.0023 | 0 |
| NM_017765    | PQLC2     | 0                   | 0.379827351203998 | 1      | 2.00E-04 | NA | NA | 0.0023 | 0 |
| NM_175060    | CLEC14A   | 0                   | 0.379827351203998 | 1      | 2.00E-04 | NA | NA | 0.0023 | 0 |
| NM_001164530 | ZNF135    | 0                   | 0.380281690140845 | 1      | 2.00E-04 | NA | NA | 0.0023 | 0 |
| NM_001164529 | ZNF135    | 0                   | 0.380281690140845 | 1      | 2.00E-04 | NA | NA | 0.0023 | 0 |
| NM_001164527 | ZNF135    | 0                   | 0.380281690140845 | 1      | 2.00E-04 | NA | NA | 0.0023 | 0 |
| NM_007134    | ZNF135    | 0                   | 0.380281690140845 | 1      | 2.00E-04 | NA | NA | 0.0023 | 0 |
| NM_003436    | ZNF135    | 0                   | 0.380281690140845 | 1      | 2.00E-04 | NA | NA | 0.0023 | 0 |
| NM_152390    | TMEM178A  | 0                   | 0.380281690140845 | 1      | 2.00E-04 | NA | NA | 0.0023 | 0 |
| NM_198966    | PTHLH     | 0                   | 0.380281690140845 | 1      | 2.00E-04 | NA | NA | 0.0023 | 0 |
| NM_198964    | PTHLH     | 0                   | 0.380281690140845 | 1      | 2.00E-04 | NA | NA | 0.0023 | 0 |
| NM_001098268 | LIG4      | 0                   | 0.380281690140845 | 1      | 2.00E-04 | NA | NA | 0.0023 | 0 |
| NM_181602    | KRTAP6-1  | 0                   | 0.380281690140845 | 1      | 2.00E-04 | NA | NA | 0.0023 | 0 |

|              |              |                    |                   |   |          |    |    |        |   |
|--------------|--------------|--------------------|-------------------|---|----------|----|----|--------|---|
| NM_017580    | ZRANB1       | 0                  | 0.380736029077692 | 1 | 2.00E-04 | NA | NA | 0.0023 | 0 |
| NM_001190469 | GDNF         | 0                  | 0.381190368014539 | 1 | 2.00E-04 | NA | NA | 0.0023 | 0 |
| NM_001190468 | GDNF         | 0                  | 0.381190368014539 | 1 | 2.00E-04 | NA | NA | 0.0023 | 0 |
| NM_130435    | PTPRE        | 0                  | 0.381644706951386 | 1 | 2.00E-04 | NA | NA | 0.0023 | 0 |
| NM_001018008 | TPM1         | 0                  | 0.381644706951386 | 1 | 2.00E-04 | NA | NA | 0.0023 | 0 |
| NM_001172110 | SENP8        | 0                  | 0.381644706951386 | 1 | 2.00E-04 | NA | NA | 0.0023 | 0 |
| NM_020977    | ANK2         | 0                  | 0.381644706951386 | 1 | 2.00E-04 | NA | NA | 0.0023 | 0 |
| NM_001148    | ANK2         | 0                  | 0.381644706951386 | 1 | 2.00E-04 | NA | NA | 0.0023 | 0 |
| NM_002467    | MYC          | 0                  | 0.381644706951386 | 1 | 2.00E-04 | NA | NA | 0.0023 | 0 |
| NM_000495    | COL4A5       | 0                  | 0.381644706951386 | 1 | 2.00E-04 | NA | NA | 0.0023 | 0 |
| NM_033380    | COL4A5       | 0                  | 0.381644706951386 | 1 | 2.00E-04 | NA | NA | 0.0023 | 0 |
| NM_001098538 | PRR4         | 0                  | 0.381644706951386 | 1 | 2.00E-04 | NA | NA | 0.0023 | 0 |
| NM_007244    | PRR4         | 0                  | 0.381644706951386 | 1 | 2.00E-04 | NA | NA | 0.0023 | 0 |
| NM_018451    | CENPJ        | 0                  | 0.381644706951386 | 1 | 2.00E-04 | NA | NA | 0.0023 | 0 |
| NR_047595    | CENPJ        | 0                  | 0.381644706951386 | 1 | 2.00E-04 | NA | NA | 0.0023 | 0 |
| NR_047594    | CENPJ        | 0                  | 0.381644706951386 | 1 | 2.00E-04 | NA | NA | 0.0023 | 0 |
| NM_199051    | BRINP3       | 0                  | 0.382099045888233 | 1 | 2.00E-04 | NA | NA | 0.0023 | 0 |
| NR_002991    | SNORA5C      | 0                  | 0.382099045888233 | 1 | 2.00E-04 | NA | NA | 0.0023 | 0 |
| NM_019048    | ASNSD1       | 0                  | 0.38255338482508  | 1 | 2.00E-04 | NA | NA | 0.0023 | 0 |
| NM_006032    | CPNE6        | 0                  | 0.383007723761926 | 1 | 2.00E-04 | NA | NA | 0.0023 | 0 |
| NM_003039    | SLC2A5       | 0                  | 0.383007723761926 | 1 | 2.00E-04 | NA | NA | 0.0023 | 0 |
| NM_001135585 | SLC2A5       | 0                  | 0.383007723761926 | 1 | 2.00E-04 | NA | NA | 0.0023 | 0 |
| NR_027768    | DPY19L2P2    | 0                  | 0.383007723761926 | 1 | 2.00E-04 | NA | NA | 0.0023 | 0 |
| NR_003561    | DPY19L2P2    | 0                  | 0.383007723761926 | 1 | 2.00E-04 | NA | NA | 0.0023 | 0 |
| NM_001001346 | CLDN20       | 0.184461608359836  | 0.567469332121763 | 1 | 2.00E-04 | NA | NA | 0.0023 | 0 |
| NM_058180    | C21orf58     | 0                  | 0.383462062698773 | 1 | 2.00E-04 | NA | NA | 0.0023 | 0 |
| NM_001193435 | PLEKHS1      | 0                  | 0.38391640163562  | 1 | 2.00E-04 | NA | NA | 0.0023 | 0 |
| NM_024889    | PLEKHS1      | 0                  | 0.38391640163562  | 1 | 2.00E-04 | NA | NA | 0.0023 | 0 |
| NM_001193434 | PLEKHS1      | 0                  | 0.38391640163562  | 1 | 2.00E-04 | NA | NA | 0.0023 | 0 |
| NR_029699    | MIR136       | 0.0963198546115402 | 0.480690595184007 | 1 | 2.00E-04 | NA | NA | 0.0023 | 0 |
| NR_038320    | LOC100507634 | 0                  | 0.384370740572467 | 1 | 2.00E-04 | NA | NA | 0.0023 | 0 |
| NM_025090    | USP36        | 0                  | 0.384370740572467 | 1 | 2.00E-04 | NA | NA | 0.0023 | 0 |
| NM_007275    | TUSC2        | 0                  | 0.384370740572467 | 1 | 2.00E-04 | NA | NA | 0.0023 | 0 |
| NM_017490    | MARK2        | 0                  | 0.384825079509314 | 1 | 2.00E-04 | NA | NA | 0.0023 | 0 |
| NM_016232    | IL1RL1       | 0                  | 0.384825079509314 | 1 | 2.00E-04 | NA | NA | 0.0023 | 0 |
| NM_001282408 | IL1RL1       | 0                  | 0.384825079509314 | 1 | 2.00E-04 | NA | NA | 0.0023 | 0 |
| NM_175065    | HIST2H2AB    | 0                  | 0.384825079509314 | 1 | 2.00E-04 | NA | NA | 0.0023 | 0 |
| NM_133452    | RAVER1       | 0                  | 0.384825079509314 | 1 | 2.00E-04 | NA | NA | 0.0023 | 0 |
| NM_032357    | CCDC115      | 0                  | 0.384825079509314 | 1 | 2.00E-04 | NA | NA | 0.0023 | 0 |
| NM_199440    | HSPD1        | 0                  | 0.384825079509314 | 1 | 2.00E-04 | NA | NA | 0.0023 | 0 |
| NR_024032    | LINC00474    | 0.0422535211267606 | 0.427078600636075 | 1 | 2.00E-04 | NA | NA | 0.0023 | 0 |
| NM_004126    | GNG11        | 0.0754202635165834 | 0.460699681962744 | 1 | 2.00E-04 | NA | NA | 0.0023 | 0 |
| NM_205860    | NR5A2        | 0                  | 0.385279418446161 | 1 | 2.00E-04 | NA | NA | 0.0023 | 0 |
| NM_003822    | NR5A2        | 0                  | 0.385279418446161 | 1 | 2.00E-04 | NA | NA | 0.0023 | 0 |
| NM_016531    | KLF3         | 0                  | 0.385279418446161 | 1 | 2.00E-04 | NA | NA | 0.0023 | 0 |
| NM_005674    | ZNF239       | 0                  | 0.385279418446161 | 1 | 2.00E-04 | NA | NA | 0.0023 | 0 |
| NM_001442    | FABP4        | 0                  | 0.385733757383008 | 1 | 2.00E-04 | NA | NA | 0.0023 | 0 |

|              |              |   |                   |        |          |    |    |        |   |
|--------------|--------------|---|-------------------|--------|----------|----|----|--------|---|
| NR_002745    | SNORD48      | 0 | 0.386188096319855 | 1      | 2.00E-04 | NA | NA | 0.0023 | 0 |
| NM_001267572 | TBC1D2       | 0 | 0.386188096319855 | 1      | 2.00E-04 | NA | NA | 0.0023 | 0 |
| NM_022780    | RMND5A       | 0 | 0.386642435256701 | 1      | 2.00E-04 | NA | NA | 0.0023 | 0 |
| NM_014170    | GTPBP8       | 0 | 0.386642435256701 | 1      | 2.00E-04 | NA | NA | 0.0023 | 0 |
| NM_138485    | GTPBP8       | 0 | 0.386642435256701 | 1      | 2.00E-04 | NA | NA | 0.0023 | 0 |
| NM_001271836 | CCDC120      | 0 | 0.386642435256701 | 1      | 2.00E-04 | NA | NA | 0.0023 | 0 |
| NM_001017977 | DCAF6        | 0 | 0.387096774193548 | 1      | 2.00E-04 | NA | NA | 0.0023 | 0 |
| NM_001198957 | DCAF6        | 0 | 0.387096774193548 | 1      | 2.00E-04 | NA | NA | 0.0023 | 0 |
| NM_018442    | DCAF6        | 0 | 0.387096774193548 | 1      | 2.00E-04 | NA | NA | 0.0023 | 0 |
| NM_001198956 | DCAF6        | 0 | 0.387096774193548 | 1      | 2.00E-04 | NA | NA | 0.0023 | 0 |
| NM_181645    | CCDC67       | 0 | 0.387096774193548 | 1      | 2.00E-04 | NA | NA | 0.0023 | 0 |
| NR_103872    | RAD51C       | 0 | 0.387096774193548 | 1      | 2.00E-04 | NA | NA | 0.0023 | 0 |
| NM_058216    | RAD51C       | 0 | 0.387096774193548 | 1      | 2.00E-04 | NA | NA | 0.0023 | 0 |
| NR_103873    | RAD51C       | 0 | 0.387096774193548 | 1      | 2.00E-04 | NA | NA | 0.0023 | 0 |
| NM_002876    | RAD51C       | 0 | 0.387096774193548 | 1      | 2.00E-04 | NA | NA | 0.0023 | 0 |
| NM_182811    | PLCG1        | 0 | 0.387096774193548 | 1      | 2.00E-04 | NA | NA | 0.0023 | 0 |
| NM_002660    | PLCG1        | 0 | 0.387096774193548 | 1      | 2.00E-04 | NA | NA | 0.0023 | 0 |
| NM_001004743 | OR5M9        | 0 | 0.387096774193548 | 1      | 2.00E-04 | NA | NA | 0.0023 | 0 |
| NR_002189    | SUMO1P1      | 0 | 0.387096774193548 | 1      | 2.00E-04 | NA | NA | 0.0023 | 0 |
| NM_015132    | SNX13        | 0 | 0.387096774193548 | 1      | 2.00E-04 | NA | NA | 0.0023 | 0 |
| NR_049881    | MIR5696      | 0 | 0.387551113130395 | 1      | 2.00E-04 | NA | NA | 0.0023 | 0 |
| NM_001130100 | KIFC3        | 0 | 0.387551113130395 | 1      | 2.00E-04 | NA | NA | 0.0023 | 0 |
| NM_005550    | KIFC3        | 0 | 0.387551113130395 | 1      | 2.00E-04 | NA | NA | 0.0023 | 0 |
| NM_207325    | DPY19L3      | 0 | 0.388005452067242 | 1      | 2.00E-04 | NA | NA | 0.0023 | 0 |
| NM_018433    | KDM3A        | 0 | 0.388005452067242 | 1      | 2.00E-04 | NA | NA | 0.0023 | 0 |
| NR_103997    | C9orf96      | 0 | 0.388005452067242 | 0.9998 | 2.00E-04 | NA | NA | 0.0023 | 0 |
| NM_153710    | C9orf96      | 0 | 0.388005452067242 | 1      | 2.00E-04 | NA | NA | 0.0023 | 0 |
| NM_017980    | LIMS2        | 0 | 0.388005452067242 | 1      | 2.00E-04 | NA | NA | 0.0023 | 0 |
| NM_002807    | PSMD1        | 0 | 0.388459791004089 | 1      | 2.00E-04 | NA | NA | 0.0023 | 0 |
| NM_001191037 | PSMD1        | 0 | 0.388459791004089 | 1      | 2.00E-04 | NA | NA | 0.0023 | 0 |
| NR_034059    | PSMD1        | 0 | 0.388459791004089 | 1      | 2.00E-04 | NA | NA | 0.0023 | 0 |
| NM_001174127 | SLC11A2      | 0 | 0.388459791004089 | 1      | 2.00E-04 | NA | NA | 0.0023 | 0 |
| NM_000617    | SLC11A2      | 0 | 0.388459791004089 | 1      | 2.00E-04 | NA | NA | 0.0023 | 0 |
| NR_033422    | SLC11A2      | 0 | 0.388459791004089 | 1      | 2.00E-04 | NA | NA | 0.0023 | 0 |
| NR_033421    | SLC11A2      | 0 | 0.388459791004089 | 1      | 2.00E-04 | NA | NA | 0.0023 | 0 |
| NM_001174128 | SLC11A2      | 0 | 0.388459791004089 | 1      | 2.00E-04 | NA | NA | 0.0023 | 0 |
| NM_001174126 | SLC11A2      | 0 | 0.388459791004089 | 1      | 2.00E-04 | NA | NA | 0.0023 | 0 |
| NM_173825    | RABL3        | 0 | 0.388459791004089 | 1      | 2.00E-04 | NA | NA | 0.0023 | 0 |
| NM_007083    | NUDT6        | 0 | 0.388914129940936 | 1      | 2.00E-04 | NA | NA | 0.0023 | 0 |
| NR_024466    | LSM5         | 0 | 0.388914129940936 | 1      | 2.00E-04 | NA | NA | 0.0023 | 0 |
| NM_003139    | SRPR         | 0 | 0.389368468877783 | 1      | 2.00E-04 | NA | NA | 0.0023 | 0 |
| NM_001177842 | SRPR         | 0 | 0.389368468877783 | 1      | 2.00E-04 | NA | NA | 0.0023 | 0 |
| NM_017420    | SIX4         | 0 | 0.389368468877783 | 1      | 2.00E-04 | NA | NA | 0.0023 | 0 |
| NM_001143944 | LEMD2        | 0 | 0.38982280781463  | 1      | 2.00E-04 | NA | NA | 0.0023 | 0 |
| NR_040773    | LOC100505666 | 0 | 0.390277146751477 | 1      | 2.00E-04 | NA | NA | 0.0023 | 0 |
| NM_197962    | GLRX2        | 0 | 0.390277146751477 | 1      | 2.00E-04 | NA | NA | 0.0023 | 0 |
| NM_014155    | ZBTB44       | 0 | 0.390277146751477 | 1      | 2.00E-04 | NA | NA | 0.0023 | 0 |

|              |                  |                   |                   |   |          |    |    |        |   |
|--------------|------------------|-------------------|-------------------|---|----------|----|----|--------|---|
| NM_207407    | <i>TMPRSS11F</i> | 0                 | 0.390731485688323 | 1 | 2.00E-04 | NA | NA | 0.0023 | 0 |
| NM_198141    | <i>GANC</i>      | 0                 | 0.39118582462517  | 1 | 2.00E-04 | NA | NA | 0.0023 | 0 |
| NM_153702    | <i>ELMOD2</i>    | 0                 | 0.39118582462517  | 1 | 2.00E-04 | NA | NA | 0.0023 | 0 |
| NR_040052    | <i>IQCH-AS1</i>  | 0                 | 0.39118582462517  | 1 | 2.00E-04 | NA | NA | 0.0023 | 0 |
| NR_040051    | <i>IQCH-AS1</i>  | 0                 | 0.39118582462517  | 1 | 2.00E-04 | NA | NA | 0.0023 | 0 |
| NR_040054    | <i>IQCH-AS1</i>  | 0                 | 0.39118582462517  | 1 | 2.00E-04 | NA | NA | 0.0023 | 0 |
| NM_002253    | <i>KDR</i>       | 0                 | 0.39118582462517  | 1 | 2.00E-04 | NA | NA | 0.0023 | 0 |
| NM_000028    | <i>AGL</i>       | 0                 | 0.391640163562017 | 1 | 2.00E-04 | NA | NA | 0.0023 | 0 |
| NM_000643    | <i>AGL</i>       | 0                 | 0.391640163562017 | 1 | 2.00E-04 | NA | NA | 0.0023 | 0 |
| NM_000644    | <i>AGL</i>       | 0                 | 0.391640163562017 | 1 | 2.00E-04 | NA | NA | 0.0023 | 0 |
| NM_000646    | <i>AGL</i>       | 0                 | 0.391640163562017 | 1 | 2.00E-04 | NA | NA | 0.0023 | 0 |
| NM_001242916 | <i>ZFAND6</i>    | 0                 | 0.391640163562017 | 1 | 2.00E-04 | NA | NA | 0.0023 | 0 |
| NM_001242915 | <i>ZFAND6</i>    | 0                 | 0.391640163562017 | 1 | 2.00E-04 | NA | NA | 0.0023 | 0 |
| NM_198469    | <i>MORN5</i>     | 0                 | 0.391640163562017 | 1 | 2.00E-04 | NA | NA | 0.0023 | 0 |
| NM_012177    | <i>FBXO5</i>     | 0                 | 0.391640163562017 | 1 | 2.00E-04 | NA | NA | 0.0023 | 0 |
| NM_153695    | <i>ZNF367</i>    | 0                 | 0.391640163562017 | 1 | 2.00E-04 | NA | NA | 0.0023 | 0 |
| NM_005252    | <i>FOS</i>       | 0                 | 0.392094502498864 | 1 | 2.00E-04 | NA | NA | 0.0023 | 0 |
| NM_003174    | <i>SVIL</i>      | 0                 | 0.392094502498864 | 1 | 2.00E-04 | NA | NA | 0.0023 | 0 |
| NR_024562    | <i>HPN-AS1</i>   | 0                 | 0.392094502498864 | 1 | 2.00E-04 | NA | NA | 0.0023 | 0 |
| NM_181885    | <i>RXFP4</i>     | 0                 | 0.392548841435711 | 1 | 2.00E-04 | NA | NA | 0.0023 | 0 |
| NM_003551    | <i>NME5</i>      | 0                 | 0.392548841435711 | 1 | 2.00E-04 | NA | NA | 0.0023 | 0 |
| NM_014296    | <i>CAPN7</i>     | 0                 | 0.393003180372558 | 1 | 2.00E-04 | NA | NA | 0.0023 | 0 |
| NM_001127608 | <i>FAM189A2</i>  | 0                 | 0.393003180372558 | 1 | 2.00E-04 | NA | NA | 0.0023 | 0 |
| NM_003937    | <i>KYNU</i>      | 0                 | 0.393457519309405 | 1 | 2.00E-04 | NA | NA | 0.0023 | 0 |
| NM_001032998 | <i>KYNU</i>      | 0                 | 0.393457519309405 | 1 | 2.00E-04 | NA | NA | 0.0023 | 0 |
| NM_001199241 | <i>KYNU</i>      | 0                 | 0.393457519309405 | 1 | 2.00E-04 | NA | NA | 0.0023 | 0 |
| NM_032016    | <i>STARD3NL</i>  | 0                 | 0.393457519309405 | 1 | 2.00E-04 | NA | NA | 0.0023 | 0 |
| NM_032169    | <i>ACAD11</i>    | 0                 | 0.393911858246252 | 1 | 2.00E-04 | NA | NA | 0.0023 | 0 |
| NM_003530    | <i>HIST1H3D</i>  | 0                 | 0.393911858246252 | 1 | 2.00E-04 | NA | NA | 0.0023 | 0 |
| NM_021065    | <i>HIST1H2AD</i> | 0                 | 0.393911858246252 | 1 | 2.00E-04 | NA | NA | 0.0023 | 0 |
| NM_001199261 | <i>UCHL5</i>     | 0                 | 0.394366197183099 | 1 | 2.00E-04 | NA | NA | 0.0023 | 0 |
| NM_001199262 | <i>UCHL5</i>     | 0                 | 0.394366197183099 | 1 | 2.00E-04 | NA | NA | 0.0023 | 0 |
| NM_001199263 | <i>UCHL5</i>     | 0                 | 0.394366197183099 | 1 | 2.00E-04 | NA | NA | 0.0023 | 0 |
| NM_015984    | <i>UCHL5</i>     | 0                 | 0.394366197183099 | 1 | 2.00E-04 | NA | NA | 0.0023 | 0 |
| NM_000642    | <i>AGL</i>       | 0                 | 0.394820536119945 | 1 | 2.00E-04 | NA | NA | 0.0023 | 0 |
| NM_006352    | <i>ZBTB18</i>    | 0                 | 0.394820536119945 | 1 | 2.00E-04 | NA | NA | 0.0023 | 0 |
| NM_005496    | <i>SMC4</i>      | 0                 | 0.394820536119945 | 1 | 2.00E-04 | NA | NA | 0.0023 | 0 |
| NM_001035230 | <i>RABGAP1L</i>  | 0                 | 0.395274875056792 | 1 | 2.00E-04 | NA | NA | 0.0023 | 0 |
| NM_001128627 | <i>SPIRE1</i>    | 0                 | 0.395274875056792 | 1 | 2.00E-04 | NA | NA | 0.0023 | 0 |
| NM_001005242 | <i>PKP2</i>      | 0                 | 0.395729213993639 | 1 | 2.00E-04 | NA | NA | 0.0023 | 0 |
| NM_004572    | <i>PKP2</i>      | 0                 | 0.395729213993639 | 1 | 2.00E-04 | NA | NA | 0.0023 | 0 |
| NM_000236    | <i>LIPC</i>      | 0.125397546569741 | 0.52112676056338  | 1 | 2.00E-04 | NA | NA | 0.0023 | 0 |
| NM_001165978 | <i>PROM2</i>     | 0                 | 0.396183552930486 | 1 | 2.00E-04 | NA | NA | 0.0023 | 0 |
| NM_001165977 | <i>PROM2</i>     | 0                 | 0.396183552930486 | 1 | 2.00E-04 | NA | NA | 0.0023 | 0 |
| NM_144707    | <i>PROM2</i>     | 0                 | 0.396183552930486 | 1 | 2.00E-04 | NA | NA | 0.0023 | 0 |
| NM_052851    | <i>STARD13</i>   | 0                 | 0.396183552930486 | 1 | 2.00E-04 | NA | NA | 0.0023 | 0 |
| NM_001243474 | <i>STARD13</i>   | 0                 | 0.396183552930486 | 1 | 2.00E-04 | NA | NA | 0.0023 | 0 |



|              |            |                   |                   |        |          |    |    |        |   |
|--------------|------------|-------------------|-------------------|--------|----------|----|----|--------|---|
| NM_153219    | ZNF524     | 0                 | 0.396637891867333 | 1      | 2.00E-04 | NA | NA | 0.0023 | 0 |
| NM_001243014 | ABCB9      | 0                 | 0.396637891867333 | 1      | 2.00E-04 | NA | NA | 0.0023 | 0 |
| NM_019625    | ABCB9      | 0                 | 0.396637891867333 | 1      | 2.00E-04 | NA | NA | 0.0023 | 0 |
| NM_203444    | ABCB9      | 0                 | 0.396637891867333 | 1      | 2.00E-04 | NA | NA | 0.0023 | 0 |
| NM_019624    | ABCB9      | 0                 | 0.396637891867333 | 1      | 2.00E-04 | NA | NA | 0.0023 | 0 |
| NM_001243013 | ABCB9      | 0                 | 0.396637891867333 | 1      | 2.00E-04 | NA | NA | 0.0023 | 0 |
| NM_020800    | IFT80      | 0                 | 0.396637891867333 | 1      | 2.00E-04 | NA | NA | 0.0023 | 0 |
| NM_001190241 | IFT80      | 0                 | 0.396637891867333 | 1      | 2.00E-04 | NA | NA | 0.0023 | 0 |
| NM_015942    | MTERFD1    | 0                 | 0.396637891867333 | 1      | 2.00E-04 | NA | NA | 0.0023 | 0 |
| NM_207040    | TCF12      | 0                 | 0.39709223080418  | 1      | 2.00E-04 | NA | NA | 0.0023 | 0 |
| NM_001161376 | C6orf136   | 0                 | 0.39709223080418  | 1      | 2.00E-04 | NA | NA | 0.0023 | 0 |
| NM_145029    | C6orf136   | 0                 | 0.39709223080418  | 1      | 2.00E-04 | NA | NA | 0.0023 | 0 |
| NM_001109938 | C6orf136   | 0                 | 0.39709223080418  | 1      | 2.00E-04 | NA | NA | 0.0023 | 0 |
| NM_006113    | VAV3       | 0                 | 0.39709223080418  | 1      | 2.00E-04 | NA | NA | 0.0023 | 0 |
| NM_201613    | IKBIP      | 0                 | 0.39709223080418  | 1      | 2.00E-04 | NA | NA | 0.0023 | 0 |
| NM_201612    | IKBIP      | 0                 | 0.39709223080418  | 1      | 2.00E-04 | NA | NA | 0.0023 | 0 |
| NM_153687    | IKBIP      | 0                 | 0.39709223080418  | 1      | 2.00E-04 | NA | NA | 0.0023 | 0 |
| NM_000921    | PDE3A      | 0                 | 0.397546569741027 | 1      | 2.00E-04 | NA | NA | 0.0023 | 0 |
| NM_199246    | CCNG1      | 0                 | 0.397546569741027 | 1      | 2.00E-04 | NA | NA | 0.0023 | 0 |
| NM_004060    | CCNG1      | 0                 | 0.397546569741027 | 1      | 2.00E-04 | NA | NA | 0.0023 | 0 |
| NR_036208    | MIR4323    | 0                 | 0.397546569741027 | 1      | 2.00E-04 | NA | NA | 0.0023 | 0 |
| NR_038228    | RASSF8-AS1 | 0.104043616537937 | 0.502498864152658 | 1      | 2.00E-04 | NA | NA | 0.0023 | 0 |
| NM_004973    | JARID2     | 0                 | 0.398455247614721 | 1      | 2.00E-04 | NA | NA | 0.0023 | 0 |
| NM_001085430 | C17orf67   | 0                 | 0.398455247614721 | 1      | 2.00E-04 | NA | NA | 0.0023 | 0 |
| NM_001164405 | BHLHA9     | 0                 | 0.398909586551567 | 1      | 2.00E-04 | NA | NA | 0.0023 | 0 |
| NR_002975    | SNORA43    | 0                 | 0.398909586551567 | 1      | 2.00E-04 | NA | NA | 0.0023 | 0 |
| NR_049820    | MIR5188    | 0                 | 0.399363925488414 | 1      | 2.00E-04 | NA | NA | 0.0023 | 0 |
| NM_181646    | ZNF804B    | 0                 | 0.399363925488414 | 1      | 2.00E-04 | NA | NA | 0.0023 | 0 |
| NM_001040102 | OPALIN     | 0                 | 0.399363925488414 | 1      | 2.00E-04 | NA | NA | 0.0023 | 0 |
| NM_001040103 | OPALIN     | 0                 | 0.399363925488414 | 1      | 2.00E-04 | NA | NA | 0.0023 | 0 |
| NM_001284320 | OPALIN     | 0                 | 0.399363925488414 | 1      | 2.00E-04 | NA | NA | 0.0023 | 0 |
| NM_001284321 | OPALIN     | 0                 | 0.399363925488414 | 1      | 2.00E-04 | NA | NA | 0.0023 | 0 |
| NR_104297    | OPALIN     | 0                 | 0.399363925488414 | 1      | 2.00E-04 | NA | NA | 0.0023 | 0 |
| NM_033207    | OPALIN     | 0                 | 0.399363925488414 | 1      | 2.00E-04 | NA | NA | 0.0023 | 0 |
| NM_001284322 | OPALIN     | 0                 | 0.399363925488414 | 1      | 2.00E-04 | NA | NA | 0.0023 | 0 |
| NR_104296    | OPALIN     | 0                 | 0.399363925488414 | 1      | 2.00E-04 | NA | NA | 0.0023 | 0 |
| NR_034159    | FLJ30403   | 0                 | 0.399363925488414 | 1      | 2.00E-04 | NA | NA | 0.0023 | 0 |
| NM_001135610 | PRDM2      | 0                 | 0.399818264425261 | 1      | 2.00E-04 | NA | NA | 0.0023 | 0 |
| NM_130387    | ASB14      | 0                 | 0.399818264425261 | 1      | 2.00E-04 | NA | NA | 0.0023 | 0 |
| NM_001199933 | SESN1      | 0                 | 0.399818264425261 | 0.9998 | 2.00E-04 | NA | NA | 0.0023 | 0 |
| NM_005195    | CEBPD      | 0                 | 0.399818264425261 | 1      | 2.00E-04 | NA | NA | 0.0023 | 0 |
| NM_001008895 | CUL4A      | 0                 | 0.400272603362108 | 1      | 2.00E-04 | NA | NA | 0.0023 | 0 |
| NM_020786    | PDP2       | 0                 | 0.400272603362108 | 1      | 2.00E-04 | NA | NA | 0.0023 | 0 |
| NM_013330    | NME7       | 0                 | 0.400272603362108 | 1      | 2.00E-04 | NA | NA | 0.0023 | 0 |
| NM_197972    | NME7       | 0                 | 0.400272603362108 | 1      | 2.00E-04 | NA | NA | 0.0023 | 0 |
| NR_104229    | NME7       | 0                 | 0.400272603362108 | 1      | 2.00E-04 | NA | NA | 0.0023 | 0 |
| NM_001284278 | PITPNB     | 0                 | 0.400726942298955 | 1      | 2.00E-04 | NA | NA | 0.0023 | 0 |

|              |           |   |                   |   |          |    |    |        |          |
|--------------|-----------|---|-------------------|---|----------|----|----|--------|----------|
| NM_145333    | MAP3K7    | 0 | 0.400726942298955 | 1 | 2.00E-04 | NA | NA | 0.0023 | 0        |
| NM_145332    | MAP3K7    | 0 | 0.400726942298955 | 1 | 2.00E-04 | NA | NA | 0.0023 | 0        |
| NM_145331    | MAP3K7    | 0 | 0.400726942298955 | 1 | 2.00E-04 | NA | NA | 0.0023 | 0        |
| NM_003188    | MAP3K7    | 0 | 0.400726942298955 | 1 | 2.00E-04 | NA | NA | 0.0023 | 0        |
| NM_001127598 | IGF2      | 0 | 0.401181281235802 | 1 | 2.00E-04 | NA | NA | 0.0023 | 0        |
| NM_000539    | RHO       | 0 | 0.401635620172649 | 1 | 2.00E-04 | NA | NA | 0.0023 | 0        |
| NM_006217    | SERPINI2  | 0 | 0.401635620172649 | 1 | 2.00E-04 | NA | NA | 0.0023 | 0        |
| NM_001012303 | SERPINI2  | 0 | 0.401635620172649 | 1 | 2.00E-04 | NA | NA | 0.0023 | 0        |
| NM_001271785 | DYNC1I2   | 0 | 0.402089959109496 | 1 | 2.00E-04 | NA | NA | 0.0023 | 0        |
| NM_001271789 | DYNC1I2   | 0 | 0.402089959109496 | 1 | 2.00E-04 | NA | NA | 0.0023 | 0        |
| NM_001271787 | DYNC1I2   | 0 | 0.402089959109496 | 1 | 2.00E-04 | NA | NA | 0.0023 | 0        |
| NM_016587    | CBX3      | 0 | 0.402089959109496 | 1 | 4.00E-04 | NA | NA | 0.0023 | 1.00E-04 |
| NM_005713    | COL4A3BP  | 0 | 0.402089959109496 | 1 | 2.00E-04 | NA | NA | 0.0023 | 0        |
| NM_001130105 | COL4A3BP  | 0 | 0.402089959109496 | 1 | 2.00E-04 | NA | NA | 0.0023 | 0        |
| NM_031361    | COL4A3BP  | 0 | 0.402089959109496 | 1 | 2.00E-04 | NA | NA | 0.0023 | 0        |
| NM_153268    | PLCXD2    | 0 | 0.402544298046343 | 1 | 2.00E-04 | NA | NA | 0.0023 | 0        |
| NM_001185106 | PLCXD2    | 0 | 0.402544298046343 | 1 | 2.00E-04 | NA | NA | 0.0023 | 0        |
| NM_001114137 | DMTN      | 0 | 0.402544298046343 | 1 | 2.00E-04 | NA | NA | 0.0023 | 0        |
| NM_002137    | HNRNPA2B1 | 0 | 0.402544298046343 | 1 | 6.00E-04 | NA | NA | 0.0099 | 1.00E-04 |
| NM_031243    | HNRNPA2B1 | 0 | 0.402544298046343 | 1 | 4.00E-04 | NA | NA | 0.0023 | 1.00E-04 |
| NR_024561    | HPN-AS1   | 0 | 0.402998636983189 | 1 | 2.00E-04 | NA | NA | 0.0023 | 0        |
| NM_182609    | ZNF677    | 0 | 0.402998636983189 | 1 | 2.00E-04 | NA | NA | 0.0023 | 0        |
| NM_001199692 | SLC4A2    | 0 | 0.40436165379373  | 1 | 2.00E-04 | NA | NA | 0.0023 | 0        |
| NM_001256891 | SRI       | 0 | 0.40436165379373  | 1 | 2.00E-04 | NA | NA | 0.0023 | 0        |
| NM_003130    | SRI       | 0 | 0.40436165379373  | 1 | 2.00E-04 | NA | NA | 0.0023 | 0        |
| NM_003899    | ARHGEF7   | 0 | 0.404815992730577 | 1 | 2.00E-04 | NA | NA | 0.0023 | 0        |
| NM_199285    | PRR19     | 0 | 0.404815992730577 | 1 | 2.00E-04 | NA | NA | 0.0023 | 0        |
| NM_004824    | CDYL      | 0 | 0.404815992730577 | 1 | 2.00E-04 | NA | NA | 0.0023 | 0        |
| NM_057162    | KLHL4     | 0 | 0.404815992730577 | 1 | 2.00E-04 | NA | NA | 0.0023 | 0        |
| NM_019117    | KLHL4     | 0 | 0.404815992730577 | 1 | 2.00E-04 | NA | NA | 0.0023 | 0        |
| NM_018903    | PCDHA12   | 0 | 0.405724670604271 | 1 | 2.00E-04 | NA | NA | 0.0023 | 0        |
| NM_031864    | PCDHA12   | 0 | 0.405724670604271 | 1 | 2.00E-04 | NA | NA | 0.0023 | 0        |
| NM_001199758 | MTHFS     | 0 | 0.405724670604271 | 1 | 2.00E-04 | NA | NA | 0.0023 | 0        |
| NM_003306    | TRPC4     | 0 | 0.406633348477965 | 1 | 2.00E-04 | NA | NA | 0.0023 | 0        |
| NM_016179    | TRPC4     | 0 | 0.406633348477965 | 1 | 2.00E-04 | NA | NA | 0.0023 | 0        |
| NM_001135957 | TRPC4     | 0 | 0.406633348477965 | 1 | 2.00E-04 | NA | NA | 0.0023 | 0        |
| NM_001135956 | TRPC4     | 0 | 0.406633348477965 | 1 | 2.00E-04 | NA | NA | 0.0023 | 0        |
| NM_001135958 | TRPC4     | 0 | 0.406633348477965 | 1 | 2.00E-04 | NA | NA | 0.0023 | 0        |
| NM_001135955 | TRPC4     | 0 | 0.406633348477965 | 1 | 2.00E-04 | NA | NA | 0.0023 | 0        |
| NM_013255    | MKLN1     | 0 | 0.407087687414811 | 1 | 2.00E-04 | NA | NA | 0.0023 | 0        |
| NR_026813    | LINC00597 | 0 | 0.407087687414811 | 1 | 2.00E-04 | NA | NA | 0.0023 | 0        |
| NM_003571    | BFP2      | 0 | 0.407542026351658 | 1 | 2.00E-04 | NA | NA | 0.0023 | 0        |
| NM_001271971 | HSP90AB1  | 0 | 0.407542026351658 | 1 | 2.00E-04 | NA | NA | 0.0023 | 0        |
| NM_001271972 | HSP90AB1  | 0 | 0.407542026351658 | 1 | 2.00E-04 | NA | NA | 0.0023 | 0        |
| NM_001271969 | HSP90AB1  | 0 | 0.407542026351658 | 1 | 2.00E-04 | NA | NA | 0.0023 | 0        |
| NM_007355    | HSP90AB1  | 0 | 0.407542026351658 | 1 | 2.00E-04 | NA | NA | 0.0023 | 0        |
| NR_015374    | LOC401463 | 0 | 0.407542026351658 | 1 | 2.00E-04 | NA | NA | 0.0023 | 0        |

|              |           |                   |                   |        |          |    |    |        |   |
|--------------|-----------|-------------------|-------------------|--------|----------|----|----|--------|---|
| NM_205768    | ZBTB18    | 0                 | 0.407996365288505 | 1      | 2.00E-04 | NA | NA | 0.0023 | 0 |
| NM_001190827 | FAM217B   | 0                 | 0.407996365288505 | 1      | 2.00E-04 | NA | NA | 0.0023 | 0 |
| NM_022106    | FAM217B   | 0                 | 0.407996365288505 | 1      | 2.00E-04 | NA | NA | 0.0023 | 0 |
| NM_017777    | MKS1      | 0                 | 0.407996365288505 | 1      | 2.00E-04 | NA | NA | 0.0023 | 0 |
| NM_001165927 | MKS1      | 0                 | 0.407996365288505 | 1      | 2.00E-04 | NA | NA | 0.0023 | 0 |
| NM_003849    | SUCLG1    | 0                 | 0.407996365288505 | 1      | 2.00E-04 | NA | NA | 0.0023 | 0 |
| NM_001012361 | WDR31     | 0                 | 0.407996365288505 | 1      | 2.00E-04 | NA | NA | 0.0023 | 0 |
| NM_145241    | WDR31     | 0                 | 0.407996365288505 | 1      | 2.00E-04 | NA | NA | 0.0023 | 0 |
| NM_001098512 | PRKG1     | 0                 | 0.408450704225352 | 1      | 2.00E-04 | NA | NA | 0.0023 | 0 |
| NM_005717    | ARPC5     | 0                 | 0.408450704225352 | 1      | 2.00E-04 | NA | NA | 0.0023 | 0 |
| NM_001270439 | ARPC5     | 0                 | 0.408450704225352 | 1      | 2.00E-04 | NA | NA | 0.0023 | 0 |
| NM_024537    | CARS2     | 0                 | 0.408450704225352 | 1      | 2.00E-04 | NA | NA | 0.0023 | 0 |
| NM_020125    | SLAMF8    | 0                 | 0.408905043162199 | 1      | 2.00E-04 | NA | NA | 0.0023 | 0 |
| NM_080664    | DTD2      | 0                 | 0.408905043162199 | 1      | 2.00E-04 | NA | NA | 0.0023 | 0 |
| NM_005298    | GPR25     | 0.135393003180373 | 0.544752385279418 | 1      | 2.00E-04 | NA | NA | 0.0023 | 0 |
| NM_002687    | PNN       | 0                 | 0.409359382099046 | 0.9994 | 2.00E-04 | NA | NA | 0.0023 | 0 |
| NR_024484    | LINC00909 | 0                 | 0.409359382099046 | 1      | 2.00E-04 | NA | NA | 0.0023 | 0 |
| NM_001852    | COL9A2    | 0                 | 0.409813721035893 | 1      | 2.00E-04 | NA | NA | 0.0023 | 0 |
| NM_000146    | FTL       | 0                 | 0.41026805997274  | 1      | 2.00E-04 | NA | NA | 0.0023 | 0 |
| NM_001256080 | KLK2      | 0                 | 0.41026805997274  | 1      | 2.00E-04 | NA | NA | 0.0023 | 0 |
| NM_005551    | KLK2      | 0                 | 0.41026805997274  | 1      | 2.00E-04 | NA | NA | 0.0023 | 0 |
| NR_045763    | KLK2      | 0                 | 0.41026805997274  | 1      | 2.00E-04 | NA | NA | 0.0023 | 0 |
| NR_045762    | KLK2      | 0                 | 0.41026805997274  | 1      | 2.00E-04 | NA | NA | 0.0023 | 0 |
| NM_001002231 | KLK2      | 0                 | 0.41026805997274  | 1      | 2.00E-04 | NA | NA | 0.0023 | 0 |
| NM_001256213 | ATP1A3    | 0                 | 0.41026805997274  | 1      | 2.00E-04 | NA | NA | 0.0023 | 0 |
| NM_052865    | MGME1     | 0                 | 0.411176737846433 | 1      | 2.00E-04 | NA | NA | 0.0023 | 0 |
| NM_004286    | GTPBP1    | 0                 | 0.411176737846433 | 1      | 2.00E-04 | NA | NA | 0.0023 | 0 |
| NM_001001786 | BLID      | 0                 | 0.411176737846433 | 1      | 2.00E-04 | NA | NA | 0.0023 | 0 |
| NM_001172682 | ZNF641    | 0                 | 0.411176737846433 | 1      | 2.00E-04 | NA | NA | 0.0023 | 0 |
| NM_001172681 | ZNF641    | 0                 | 0.411176737846433 | 1      | 2.00E-04 | NA | NA | 0.0023 | 0 |
| NM_152320    | ZNF641    | 0                 | 0.411176737846433 | 1      | 2.00E-04 | NA | NA | 0.0023 | 0 |
| NM_012460    | TIMM9     | 0                 | 0.411176737846433 | 1      | 2.00E-04 | NA | NA | 0.0023 | 0 |
| NM_004589    | SCO1      | 0                 | 0.411176737846433 | 1      | 2.00E-04 | NA | NA | 0.0023 | 0 |
| NM_006642    | SDCCAG8   | 0                 | 0.41163107678328  | 1      | 2.00E-04 | NA | NA | 0.0023 | 0 |
| NM_021214    | ABHD17C   | 0                 | 0.41163107678328  | 1      | 2.00E-04 | NA | NA | 0.0023 | 0 |
| NR_026751    | ZNRD1-AS1 | 0                 | 0.41163107678328  | 1      | 2.00E-04 | NA | NA | 0.0023 | 0 |
| NM_001039165 | MRGPRE    | 0.18400726942299  | 0.596092685143117 | 1      | 2.00E-04 | NA | NA | 0.0023 | 0 |
| NM_205856    | SPACA5    | 0                 | 0.412085415720127 | 1      | 2.00E-04 | NA | NA | 0.0023 | 0 |
| NM_002442    | MSI1      | 0                 | 0.412539754656974 | 1      | 2.00E-04 | NA | NA | 0.0023 | 0 |
| NM_016147    | PPME1     | 0                 | 0.412994093593821 | 1      | 2.00E-04 | NA | NA | 0.0023 | 0 |
| NM_001271593 | PPME1     | 0                 | 0.412994093593821 | 1      | 2.00E-04 | NA | NA | 0.0023 | 0 |
| NM_001251855 | PIK3R5    | 0                 | 0.412994093593821 | 1      | 2.00E-04 | NA | NA | 0.0023 | 0 |
| NM_001251851 | PIK3R5    | 0                 | 0.412994093593821 | 1      | 2.00E-04 | NA | NA | 0.0023 | 0 |
| NM_001142633 | PIK3R5    | 0                 | 0.412994093593821 | 1      | 2.00E-04 | NA | NA | 0.0023 | 0 |
| NM_001251853 | PIK3R5    | 0                 | 0.412994093593821 | 1      | 2.00E-04 | NA | NA | 0.0023 | 0 |
| NM_001251852 | PIK3R5    | 0                 | 0.412994093593821 | 1      | 2.00E-04 | NA | NA | 0.0023 | 0 |
| NM_022444    | SLC13A1   | 0                 | 0.412994093593821 | 1      | 2.00E-04 | NA | NA | 0.0023 | 0 |

|              |           |   |                   |        |          |    |    |        |        |
|--------------|-----------|---|-------------------|--------|----------|----|----|--------|--------|
| NM_001002918 | OR8D2     | 0 | 0.413448432530668 | 1      | 2.00E-04 | NA | NA | 0.0023 | 0      |
| NM_138704    | NDNL2     | 0 | 0.413448432530668 | 1      | 2.00E-04 | NA | NA | 0.0023 | 0      |
| NM_001172517 | SATB2     | 0 | 0.413448432530668 | 1      | 2.00E-04 | NA | NA | 0.0023 | 0      |
| NM_194429    | FGFR1OP   | 0 | 0.413902771467515 | 1      | 2.00E-04 | NA | NA | 0.0023 | 0      |
| NM_007045    | FGFR1OP   | 0 | 0.413902771467515 | 1      | 2.00E-04 | NA | NA | 0.0023 | 0      |
| NM_001278690 | FGFR1OP   | 0 | 0.413902771467515 | 1      | 2.00E-04 | NA | NA | 0.0023 | 0      |
| NM_001270615 | DEDD2     | 0 | 0.413902771467515 | 1      | 2.00E-04 | NA | NA | 0.0023 | 0      |
| NM_133328    | DEDD2     | 0 | 0.413902771467515 | 1      | 2.00E-04 | NA | NA | 0.0023 | 0      |
| NR_073050    | DEDD2     | 0 | 0.413902771467515 | 1      | 2.00E-04 | NA | NA | 0.0023 | 0      |
| NR_073049    | DEDD2     | 0 | 0.413902771467515 | 1      | 2.00E-04 | NA | NA | 0.0023 | 0      |
| NR_073048    | DEDD2     | 0 | 0.413902771467515 | 1      | 2.00E-04 | NA | NA | 0.0023 | 0      |
| NR_073046    | DEDD2     | 0 | 0.413902771467515 | 1      | 2.00E-04 | NA | NA | 0.0023 | 0      |
| NR_073052    | DEDD2     | 0 | 0.413902771467515 | 1      | 2.00E-04 | NA | NA | 0.0023 | 0      |
| NR_073051    | DEDD2     | 0 | 0.413902771467515 | 1      | 2.00E-04 | NA | NA | 0.0023 | 0      |
| NM_005413    | SIX3      | 0 | 0.414357110404362 | 1      | 2.00E-04 | NA | NA | 0.0023 | 0      |
| NR_027650    | C15orf40  | 0 | 0.414357110404362 | 1      | 2.00E-04 | NA | NA | 0.0023 | 0      |
| NR_027649    | C15orf40  | 0 | 0.414357110404362 | 1      | 2.00E-04 | NA | NA | 0.0023 | 0      |
| NM_001160116 | C15orf40  | 0 | 0.414357110404362 | 1      | 2.00E-04 | NA | NA | 0.0023 | 0      |
| NM_001160115 | C15orf40  | 0 | 0.414357110404362 | 1      | 2.00E-04 | NA | NA | 0.0023 | 0      |
| NM_001160113 | C15orf40  | 0 | 0.414357110404362 | 1      | 2.00E-04 | NA | NA | 0.0023 | 0      |
| NM_001160114 | C15orf40  | 0 | 0.414357110404362 | 1      | 2.00E-04 | NA | NA | 0.0023 | 0      |
| NM_144597    | C15orf40  | 0 | 0.414357110404362 | 1      | 2.00E-04 | NA | NA | 0.0023 | 0      |
| NM_020747    | ZNF608    | 0 | 0.414357110404362 | 1      | 2.00E-04 | NA | NA | 0.0023 | 0      |
| NM_181558    | RFC3      | 0 | 0.414811449341209 | 1      | 2.00E-04 | NA | NA | 0.0023 | 0      |
| NM_002915    | RFC3      | 0 | 0.414811449341209 | 1      | 2.00E-04 | NA | NA | 0.0023 | 0      |
| NM_025198    | MTERFD3   | 0 | 0.414811449341209 | 1      | 2.00E-04 | NA | NA | 0.0023 | 0      |
| NM_001033050 | MTERFD3   | 0 | 0.414811449341209 | 1      | 2.00E-04 | NA | NA | 0.0023 | 0      |
| NM_144693    | ZNF558    | 0 | 0.414811449341209 | 1      | 2.00E-04 | NA | NA | 0.0023 | 0      |
| NM_001112732 | MCF2L     | 0 | 0.415265788278055 | 1      | 2.00E-04 | NA | NA | 0.0023 | 0      |
| NM_014213    | HOXD9     | 0 | 0.415265788278055 | 1      | 2.00E-04 | NA | NA | 0.0023 | 0      |
| NM_016229    | CYB5R2    | 0 | 0.415265788278055 | 1      | 2.00E-04 | NA | NA | 0.0023 | 0      |
| NM_005510    | DXO       | 0 | 0.415265788278055 | 1      | 2.00E-04 | NA | NA | 0.0023 | 0      |
| NM_015554    | GLCE      | 0 | 0.415720127214902 | 1      | 2.00E-04 | NA | NA | 0.0023 | 0      |
| NR_002144    | LOC407835 | 0 | 0.415720127214902 | 1      | 2.00E-04 | NA | NA | 0.0023 | 0      |
| NR_046414    | LINC00441 | 0 | 0.416174466151749 | 1      | 2.00E-04 | NA | NA | 0.0023 | 0      |
| NM_021005    | NR2F2     | 0 | 0.416628805088596 | 1      | 2.00E-04 | NA | NA | 0.0023 | 0      |
| NM_016836    | RBMS1     | 0 | 0.416628805088596 | 1      | 2.00E-04 | NA | NA | 0.0023 | 0      |
| NM_002897    | RBMS1     | 0 | 0.416628805088596 | 1      | 2.00E-04 | NA | NA | 0.0023 | 0      |
| NM_001177875 | PCSK1     | 0 | 0.416628805088596 | 0.9222 | 0.0802   | NA | NA | 0.8659 | 0.0134 |
| NM_000346    | SOX9      | 0 | 0.417083144025443 | 1      | 2.00E-04 | NA | NA | 0.0023 | 0      |
| NM_001267617 | ARPP21    | 0 | 0.417083144025443 | 1      | 2.00E-04 | NA | NA | 0.0023 | 0      |
| NM_014282    | HABP4     | 0 | 0.417083144025443 | 1      | 2.00E-04 | NA | NA | 0.0023 | 0      |
| NM_001136528 | SERPINE2  | 0 | 0.417083144025443 | 1      | 2.00E-04 | NA | NA | 0.0023 | 0      |
| NM_006216    | SERPINE2  | 0 | 0.417083144025443 | 1      | 2.00E-04 | NA | NA | 0.0023 | 0      |
| NM_152890    | COL24A1   | 0 | 0.41753748296229  | 1      | 2.00E-04 | NA | NA | 0.0023 | 0      |
| NM_005264    | GFRA1     | 0 | 0.41753748296229  | 1      | 2.00E-04 | NA | NA | 0.0023 | 0      |
| NM_001037442 | RUFY3     | 0 | 0.417991821899137 | 1      | 2.00E-04 | NA | NA | 0.0023 | 0      |

|              |           |                    |                   |   |          |    |    |        |   |
|--------------|-----------|--------------------|-------------------|---|----------|----|----|--------|---|
| NM_014961    | RUFY3     | 0                  | 0.417991821899137 | 1 | 2.00E-04 | NA | NA | 0.0023 | 0 |
| NM_017589    | BTG4      | 0                  | 0.417991821899137 | 1 | 2.00E-04 | NA | NA | 0.0023 | 0 |
| NM_014376    | CYFIP2    | 0.142208087233076  | 0.56065424806906  | 1 | 2.00E-04 | NA | NA | 0.0023 | 0 |
| NM_015596    | KLK13     | 0                  | 0.418446160835984 | 1 | 2.00E-04 | NA | NA | 0.0023 | 0 |
| NM_020905    | RDH14     | 0                  | 0.418446160835984 | 1 | 2.00E-04 | NA | NA | 0.0023 | 0 |
| NM_001282691 | LRRFIP2   | 0                  | 0.418446160835984 | 1 | 2.00E-04 | NA | NA | 0.0023 | 0 |
| NM_032118    | WDR54     | 0                  | 0.418900499772831 | 1 | 2.00E-04 | NA | NA | 0.0023 | 0 |
| NM_001206557 | KIAA1432  | 0                  | 0.419354838709677 | 1 | 2.00E-04 | NA | NA | 0.0023 | 0 |
| NM_020829    | KIAA1432  | 0                  | 0.419354838709677 | 1 | 2.00E-04 | NA | NA | 0.0023 | 0 |
| NM_001135920 | KIAA1432  | 0                  | 0.419354838709677 | 1 | 2.00E-04 | NA | NA | 0.0023 | 0 |
| NM_182592    | YIPF7     | 0                  | 0.419354838709677 | 1 | 2.00E-04 | NA | NA | 0.0023 | 0 |
| NM_001001994 | GPM6B     | 0                  | 0.419354838709677 | 1 | 2.00E-04 | NA | NA | 0.0023 | 0 |
| NR_027038    | MBNL1-AS1 | 0.0154475238527942 | 0.435256701499318 | 1 | 2.00E-04 | NA | NA | 0.0023 | 0 |
| NR_027037    | MBNL1-AS1 | 0.0154475238527942 | 0.435256701499318 | 1 | 2.00E-04 | NA | NA | 0.0023 | 0 |
| NM_020193    | C11orf30  | 0                  | 0.419809177646524 | 1 | 2.00E-04 | NA | NA | 0.0023 | 0 |
| NM_145204    | SENP8     | 0                  | 0.419809177646524 | 1 | 2.00E-04 | NA | NA | 0.0023 | 0 |
| NM_001172111 | SENP8     | 0                  | 0.419809177646524 | 1 | 2.00E-04 | NA | NA | 0.0023 | 0 |
| NM_198061    | CES2      | 0                  | 0.419809177646524 | 1 | 2.00E-04 | NA | NA | 0.0023 | 0 |
| NM_003869    | CES2      | 0                  | 0.419809177646524 | 1 | 2.00E-04 | NA | NA | 0.0023 | 0 |
| NM_033089    | ZCCHC3    | 0                  | 0.419809177646524 | 1 | 2.00E-04 | NA | NA | 0.0023 | 0 |
| NM_014484    | MOC53     | 0                  | 0.419809177646524 | 1 | 2.00E-04 | NA | NA | 0.0023 | 0 |
| NM_001008405 | BCAP29    | 0                  | 0.419809177646524 | 1 | 2.00E-04 | NA | NA | 0.0023 | 0 |
| NM_001166265 | LTBP1     | 0                  | 0.420263516583371 | 1 | 2.00E-04 | NA | NA | 0.0023 | 0 |
| NM_000627    | LTBP1     | 0                  | 0.420263516583371 | 1 | 2.00E-04 | NA | NA | 0.0023 | 0 |
| NM_001166266 | LTBP1     | 0                  | 0.420263516583371 | 1 | 2.00E-04 | NA | NA | 0.0023 | 0 |
| NM_001166264 | LTBP1     | 0                  | 0.420263516583371 | 1 | 2.00E-04 | NA | NA | 0.0023 | 0 |
| NM_181897    | PPP2R3A   | 0                  | 0.420263516583371 | 1 | 2.00E-04 | NA | NA | 0.0023 | 0 |
| NM_005730    | CTDSP2    | 0                  | 0.420263516583371 | 1 | 2.00E-04 | NA | NA | 0.0023 | 0 |
| NM_001031679 | MSRB3     | 0                  | 0.420717855520218 | 1 | 2.00E-04 | NA | NA | 0.0023 | 0 |
| NM_001193460 | MSRB3     | 0                  | 0.420717855520218 | 1 | 2.00E-04 | NA | NA | 0.0023 | 0 |
| NM_198080    | MSRB3     | 0                  | 0.420717855520218 | 1 | 2.00E-04 | NA | NA | 0.0023 | 0 |
| NR_046200    | LOC400558 | 0                  | 0.420717855520218 | 1 | 2.00E-04 | NA | NA | 0.0023 | 0 |
| NM_002440    | MSH4      | 0.0340754202635166 | 0.454793275783735 | 1 | 2.00E-04 | NA | NA | 0.0023 | 0 |
| NM_001013703 | EIF2AK4   | 0                  | 0.421172194457065 | 1 | 2.00E-04 | NA | NA | 0.0023 | 0 |
| NM_001199214 | STMN2     | 0                  | 0.421172194457065 | 1 | 2.00E-04 | NA | NA | 0.0023 | 0 |
| NM_007029    | STMN2     | 0                  | 0.421172194457065 | 1 | 2.00E-04 | NA | NA | 0.0023 | 0 |
| NM_000422    | KRT17     | 0                  | 0.421172194457065 | 1 | 2.00E-04 | NA | NA | 0.0023 | 0 |
| NM_001165920 | SERPINF2  | 0                  | 0.421626533393912 | 1 | 2.00E-04 | NA | NA | 0.0023 | 0 |
| NM_031292    | PUS7L     | 0                  | 0.421626533393912 | 1 | 2.00E-04 | NA | NA | 0.0023 | 0 |
| NM_001271826 | PUS7L     | 0                  | 0.421626533393912 | 1 | 2.00E-04 | NA | NA | 0.0023 | 0 |
| NR_073103    | ITGA2     | 0                  | 0.422080872330759 | 1 | 2.00E-04 | NA | NA | 0.0023 | 0 |
| NR_073106    | ITGA2     | 0                  | 0.422080872330759 | 1 | 2.00E-04 | NA | NA | 0.0023 | 0 |
| NR_073104    | ITGA2     | 0                  | 0.422080872330759 | 1 | 2.00E-04 | NA | NA | 0.0023 | 0 |
| NM_002203    | ITGA2     | 0                  | 0.422080872330759 | 1 | 2.00E-04 | NA | NA | 0.0023 | 0 |
| NR_073107    | ITGA2     | 0                  | 0.422080872330759 | 1 | 2.00E-04 | NA | NA | 0.0023 | 0 |
| NR_073105    | ITGA2     | 0                  | 0.422080872330759 | 1 | 2.00E-04 | NA | NA | 0.0023 | 0 |
| NM_001533    | HNRNPL    | 0                  | 0.422080872330759 | 1 | 2.00E-04 | NA | NA | 0.0023 | 0 |

|              |                 |                    |                   |   |          |    |    |        |   |
|--------------|-----------------|--------------------|-------------------|---|----------|----|----|--------|---|
| NM_001142522 | <i>FBXO5</i>    | 0                  | 0.422080872330759 | 1 | 2.00E-04 | NA | NA | 0.0023 | 0 |
| NM_001130110 | <i>SETBP1</i>   | 0.0831440254429805 | 0.505679236710586 | 1 | 2.00E-04 | NA | NA | 0.0023 | 0 |
| NM_001184742 | <i>ZBTB33</i>   | 0                  | 0.422535211267606 | 1 | 2.00E-04 | NA | NA | 0.0023 | 0 |
| NM_006777    | <i>ZBTB33</i>   | 0                  | 0.422535211267606 | 1 | 2.00E-04 | NA | NA | 0.0023 | 0 |
| NR_104227    | <i>SH3YL1</i>   | 0                  | 0.422535211267606 | 1 | 2.00E-04 | NA | NA | 0.0023 | 0 |
| NM_002156    | <i>HSPD1</i>    | 0                  | 0.422535211267606 | 1 | 2.00E-04 | NA | NA | 0.0023 | 0 |
| NM_012145    | <i>DTYMK</i>    | 0                  | 0.422535211267606 | 1 | 2.00E-04 | NA | NA | 0.0023 | 0 |
| NM_001165031 | <i>DTYMK</i>    | 0                  | 0.422535211267606 | 1 | 2.00E-04 | NA | NA | 0.0023 | 0 |
| NR_033255    | <i>DTYMK</i>    | 0                  | 0.422535211267606 | 1 | 2.00E-04 | NA | NA | 0.0023 | 0 |
| NM_001178034 | <i>DPP10</i>    | 0                  | 0.422989550204453 | 1 | 2.00E-04 | NA | NA | 0.0023 | 0 |
| NM_001004360 | <i>DPP10</i>    | 0                  | 0.422989550204453 | 1 | 2.00E-04 | NA | NA | 0.0023 | 0 |
| NM_022343    | <i>GLIPR2</i>   | 0                  | 0.422989550204453 | 1 | 2.00E-04 | NA | NA | 0.0023 | 0 |
| NM_012322    | <i>LSM5</i>     | 0                  | 0.423443889141299 | 1 | 2.00E-04 | NA | NA | 0.0023 | 0 |
| NM_001142966 | <i>GREB1L</i>   | 0                  | 0.423898228078146 | 1 | 2.00E-04 | NA | NA | 0.0023 | 0 |
| NM_199355    | <i>ADAMTS18</i> | 0                  | 0.423898228078146 | 1 | 2.00E-04 | NA | NA | 0.0023 | 0 |
| NM_199204    | <i>DHRS9</i>    | 0                  | 0.42480690595184  | 1 | 2.00E-04 | NA | NA | 0.0023 | 0 |
| NM_025098    | <i>MOGAT2</i>   | 0                  | 0.425715583825534 | 1 | 2.00E-04 | NA | NA | 0.0023 | 0 |
| NM_001142598 | <i>P4HA2</i>    | 0                  | 0.425715583825534 | 1 | 2.00E-04 | NA | NA | 0.0023 | 0 |
| NM_001142599 | <i>P4HA2</i>    | 0                  | 0.425715583825534 | 1 | 2.00E-04 | NA | NA | 0.0023 | 0 |
| NM_001017974 | <i>P4HA2</i>    | 0                  | 0.425715583825534 | 1 | 2.00E-04 | NA | NA | 0.0023 | 0 |
| NM_198353    | <i>KCTD8</i>    | 0.0218082689686506 | 0.447978191731031 | 1 | 2.00E-04 | NA | NA | 0.0023 | 0 |
| NM_006155    | <i>37500</i>    | 0                  | 0.426169922762381 | 1 | 2.00E-04 | NA | NA | 0.0023 | 0 |
| NM_001008491 | <i>37500</i>    | 0                  | 0.426169922762381 | 1 | 2.00E-04 | NA | NA | 0.0023 | 0 |
| NM_001206997 | <i>C4orf22</i>  | 0                  | 0.426169922762381 | 1 | 2.00E-04 | NA | NA | 0.0023 | 0 |
| NM_152770    | <i>C4orf22</i>  | 0                  | 0.426169922762381 | 1 | 2.00E-04 | NA | NA | 0.0023 | 0 |
| NM_001017963 | <i>HSP90AA1</i> | 0                  | 0.426169922762381 | 1 | 2.00E-04 | NA | NA | 0.0023 | 0 |
| NM_001142370 | <i>PTPN18</i>   | 0                  | 0.426624261699228 | 1 | 2.00E-04 | NA | NA | 0.0023 | 0 |
| NM_014369    | <i>PTPN18</i>   | 0                  | 0.426624261699228 | 1 | 2.00E-04 | NA | NA | 0.0023 | 0 |
| NM_021038    | <i>MBNL1</i>    | 0                  | 0.426624261699228 | 1 | 2.00E-04 | NA | NA | 0.0023 | 0 |
| NM_207292    | <i>MBNL1</i>    | 0                  | 0.426624261699228 | 1 | 2.00E-04 | NA | NA | 0.0023 | 0 |
| NM_002870    | <i>RAB13</i>    | 0                  | 0.427078600636075 | 1 | 2.00E-04 | NA | NA | 0.0023 | 0 |
| NR_073553    | <i>RAB13</i>    | 0                  | 0.427078600636075 | 1 | 2.00E-04 | NA | NA | 0.0023 | 0 |
| NM_017708    | <i>FAM83E</i>   | 0                  | 0.427078600636075 | 1 | 2.00E-04 | NA | NA | 0.0023 | 0 |
| NM_001122633 | <i>CPS1</i>     | 0                  | 0.428441617446615 | 1 | 2.00E-04 | NA | NA | 0.0023 | 0 |
| NM_007018    | <i>CNTRL</i>    | 0                  | 0.428441617446615 | 1 | 2.00E-04 | NA | NA | 0.0023 | 0 |
| NM_153746    | <i>ZDHHHC14</i> | 0                  | 0.428895956383462 | 1 | 2.00E-04 | NA | NA | 0.0023 | 0 |
| NM_024630    | <i>ZDHHHC14</i> | 0                  | 0.428895956383462 | 1 | 2.00E-04 | NA | NA | 0.0023 | 0 |
| NM_001174094 | <i>ZEB1</i>     | 0                  | 0.429350295320309 | 1 | 2.00E-04 | NA | NA | 0.0023 | 0 |
| NM_001128128 | <i>ZEB1</i>     | 0                  | 0.429350295320309 | 1 | 2.00E-04 | NA | NA | 0.0023 | 0 |
| NM_004960    | <i>FUS</i>      | 0                  | 0.429350295320309 | 1 | 2.00E-04 | NA | NA | 0.0023 | 0 |
| NM_001170937 | <i>FUS</i>      | 0                  | 0.429350295320309 | 1 | 2.00E-04 | NA | NA | 0.0023 | 0 |
| NM_001170634 | <i>FUS</i>      | 0                  | 0.429350295320309 | 1 | 2.00E-04 | NA | NA | 0.0023 | 0 |
| NR_028388    | <i>FUS</i>      | 0                  | 0.429350295320309 | 1 | 2.00E-04 | NA | NA | 0.0023 | 0 |
| NM_001136158 | <i>OTUD5</i>    | 0                  | 0.429350295320309 | 1 | 2.00E-04 | NA | NA | 0.0023 | 0 |
| NM_001136157 | <i>OTUD5</i>    | 0                  | 0.429350295320309 | 1 | 2.00E-04 | NA | NA | 0.0023 | 0 |
| NM_017602    | <i>OTUD5</i>    | 0                  | 0.429350295320309 | 1 | 2.00E-04 | NA | NA | 0.0023 | 0 |
| NM_018186    | <i>C1orf112</i> | 0                  | 0.429804634257156 | 1 | 2.00E-04 | NA | NA | 0.0023 | 0 |

|              |               |                     |                   |   |          |    |    |        |   |
|--------------|---------------|---------------------|-------------------|---|----------|----|----|--------|---|
| NM_005077    | TLE1          | 0                   | 0.429804634257156 | 1 | 2.00E-04 | NA | NA | 0.0023 | 0 |
| NM_018935    | PCDHB15       | 0                   | 0.430258973194003 | 1 | 2.00E-04 | NA | NA | 0.0023 | 0 |
| NR_024284    | ZEB1-AS1      | 0                   | 0.430258973194003 | 1 | 2.00E-04 | NA | NA | 0.0023 | 0 |
| NM_031952    | SPATA9        | 0                   | 0.431621990004543 | 1 | 2.00E-04 | NA | NA | 0.0023 | 0 |
| NM_001202550 | WDR27         | 0                   | 0.431621990004543 | 1 | 2.00E-04 | NA | NA | 0.0023 | 0 |
| NM_182552    | WDR27         | 0                   | 0.431621990004543 | 1 | 2.00E-04 | NA | NA | 0.0023 | 0 |
| NM_001130518 | CSGALNACT1    | 0                   | 0.431621990004543 | 1 | 2.00E-04 | NA | NA | 0.0023 | 0 |
| NR_036684    | CES2          | 0                   | 0.43207632894139  | 1 | 2.00E-04 | NA | NA | 0.0023 | 0 |
| NM_001135726 | HMBOX1        | 0                   | 0.43207632894139  | 1 | 2.00E-04 | NA | NA | 0.0023 | 0 |
| NM_024567    | HMBOX1        | 0                   | 0.43207632894139  | 1 | 2.00E-04 | NA | NA | 0.0023 | 0 |
| NR_003077    | SNORD99       | 0                   | 0.43207632894139  | 1 | 2.00E-04 | NA | NA | 0.0023 | 0 |
| NR_047518    | HOTAIR        | 0                   | 0.43207632894139  | 1 | 2.00E-04 | NA | NA | 0.0023 | 0 |
| NM_021064    | HIST1H2AG     | 0                   | 0.433439345751931 | 1 | 2.00E-04 | NA | NA | 0.0023 | 0 |
| NM_001024680 | FBXO48        | 0                   | 0.433439345751931 | 1 | 2.00E-04 | NA | NA | 0.0023 | 0 |
| NM_001189    | NKX3-2        | 0                   | 0.433439345751931 | 1 | 2.00E-04 | NA | NA | 0.0023 | 0 |
| NM_014044    | UNC50         | 0.0431621990004543  | 0.477055883689232 | 1 | 2.00E-04 | NA | NA | 0.0023 | 0 |
| NM_032025    | EIF2A         | 0                   | 0.433893684688778 | 1 | 2.00E-04 | NA | NA | 0.0023 | 0 |
| NM_020726    | NLN           | 0                   | 0.434348023625625 | 1 | 2.00E-04 | NA | NA | 0.0023 | 0 |
| NM_001161010 | ARMC10        | 0                   | 0.434348023625625 | 1 | 2.00E-04 | NA | NA | 0.0023 | 0 |
| NM_001161009 | ARMC10        | 0                   | 0.434348023625625 | 1 | 2.00E-04 | NA | NA | 0.0023 | 0 |
| NM_001161013 | ARMC10        | 0                   | 0.434348023625625 | 1 | 2.00E-04 | NA | NA | 0.0023 | 0 |
| NM_001161012 | ARMC10        | 0                   | 0.434348023625625 | 1 | 2.00E-04 | NA | NA | 0.0023 | 0 |
| NM_001161011 | ARMC10        | 0                   | 0.434348023625625 | 1 | 2.00E-04 | NA | NA | 0.0023 | 0 |
| NM_031905    | ARMC10        | 0                   | 0.434348023625625 | 1 | 2.00E-04 | NA | NA | 0.0023 | 0 |
| NM_001126049 | KLLN          | 0                   | 0.434348023625625 | 1 | 2.00E-04 | NA | NA | 0.0023 | 0 |
| NM_004394    | DAP           | 0                   | 0.434348023625625 | 1 | 2.00E-04 | NA | NA | 0.0023 | 0 |
| NR_002990    | SNORA5B       | 0                   | 0.434348023625625 | 1 | 2.00E-04 | NA | NA | 0.0023 | 0 |
| NM_014573    | TMEM97        | 0                   | 0.434802362562472 | 1 | 2.00E-04 | NA | NA | 0.0023 | 0 |
| NM_001199805 | KLRK4-KLRK1   | 0                   | 0.435711040436165 | 1 | 2.00E-04 | NA | NA | 0.0023 | 0 |
| NR_002781    | TSPY26P       | 0                   | 0.435711040436165 | 1 | 2.00E-04 | NA | NA | 0.0023 | 0 |
| NM_001167823 | BLCAP         | 0                   | 0.435711040436165 | 1 | 2.00E-04 | NA | NA | 0.0023 | 0 |
| NM_001282886 | EIF4E3        | 0                   | 0.435711040436165 | 1 | 2.00E-04 | NA | NA | 0.0023 | 0 |
| NM_144659    | TCP10L        | 0                   | 0.436165379373012 | 1 | 2.00E-04 | NA | NA | 0.0023 | 0 |
| NM_007126    | VCP           | 0                   | 0.436165379373012 | 1 | 2.00E-04 | NA | NA | 0.0023 | 0 |
| NM_005274    | GNG5          | 0                   | 0.436619718309859 | 1 | 2.00E-04 | NA | NA | 0.0023 | 0 |
| NM_000922    | PDE3B         | 0                   | 0.437074057246706 | 1 | 2.00E-04 | NA | NA | 0.0023 | 0 |
| NM_001337    | CX3CR1        | 0                   | 0.437074057246706 | 1 | 2.00E-04 | NA | NA | 0.0023 | 0 |
| NM_001171172 | CX3CR1        | 0                   | 0.437074057246706 | 1 | 2.00E-04 | NA | NA | 0.0023 | 0 |
| NM_015696    | GPX7          | 0                   | 0.437528396183553 | 1 | 2.00E-04 | NA | NA | 0.0023 | 0 |
| NM_000762    | CYP2A6        | 0.00954111767378464 | 0.447523852794184 | 1 | 2.00E-04 | NA | NA | 0.0023 | 0 |
| NR_002186    | DKFZP586I1420 | 0                   | 0.4379827351204   | 1 | 2.00E-04 | NA | NA | 0.0023 | 0 |
| NM_001037814 | GAB4          | 0                   | 0.438437074057247 | 1 | 2.00E-04 | NA | NA | 0.0023 | 0 |
| NM_020919    | ALS2          | 0                   | 0.438891412994094 | 1 | 2.00E-04 | NA | NA | 0.0023 | 0 |
| NM_001135745 | ALS2          | 0                   | 0.438891412994094 | 1 | 2.00E-04 | NA | NA | 0.0023 | 0 |
| NM_001512    | GSTA4         | 0                   | 0.438891412994094 | 1 | 2.00E-04 | NA | NA | 0.0023 | 0 |
| NM_000574    | CD55          | 0                   | 0.43934575193094  | 1 | 2.00E-04 | NA | NA | 0.0023 | 0 |
| NM_001114752 | CD55          | 0                   | 0.43934575193094  | 1 | 2.00E-04 | NA | NA | 0.0023 | 0 |

|              |              |                    |                   |        |          |    |    |        |          |
|--------------|--------------|--------------------|-------------------|--------|----------|----|----|--------|----------|
| NM_002611    | PDK2         | 0                  | 0.440254429804634 | 1      | 2.00E-04 | NA | NA | 0.0023 | 0        |
| NM_001199900 | PDK2         | 0                  | 0.440254429804634 | 1      | 2.00E-04 | NA | NA | 0.0023 | 0        |
| NM_001015891 | AK6          | 0                  | 0.440708768741481 | 1      | 2.00E-04 | NA | NA | 0.0023 | 0        |
| NM_001015892 | TAF9         | 0                  | 0.440708768741481 | 1      | 2.00E-04 | NA | NA | 0.0023 | 0        |
| NM_001204267 | GABRA4       | 0                  | 0.441163107678328 | 1      | 2.00E-04 | NA | NA | 0.0023 | 0        |
| NM_001204266 | GABRA4       | 0                  | 0.441163107678328 | 1      | 2.00E-04 | NA | NA | 0.0023 | 0        |
| NM_031435    | THAP2        | 0                  | 0.441617446615175 | 0.9994 | 6.00E-04 | NA | NA | 0.0099 | 1.00E-04 |
| NM_001098614 | PUS7L        | 0                  | 0.441617446615175 | 1      | 2.00E-04 | NA | NA | 0.0023 | 0        |
| NM_007111    | TFDP1        | 0                  | 0.442071785552022 | 1      | 2.00E-04 | NA | NA | 0.0023 | 0        |
| NR_026580    | TFDP1        | 0                  | 0.442071785552022 | 1      | 2.00E-04 | NA | NA | 0.0023 | 0        |
| NM_001083914 | CTBP2        | 0                  | 0.442071785552022 | 1      | 2.00E-04 | NA | NA | 0.0023 | 0        |
| NM_174932    | BPIFC        | 0                  | 0.442071785552022 | 1      | 2.00E-04 | NA | NA | 0.0023 | 0        |
| NM_014876    | JOSD1        | 0                  | 0.442071785552022 | 1      | 2.00E-04 | NA | NA | 0.0023 | 0        |
| NM_001204255 | SCARB2       | 0                  | 0.442526124488869 | 1      | 2.00E-04 | NA | NA | 0.0023 | 0        |
| NM_005506    | SCARB2       | 0                  | 0.442526124488869 | 1      | 2.00E-04 | NA | NA | 0.0023 | 0        |
| NM_015564    | LRRTM2       | 0                  | 0.442526124488869 | 1      | 2.00E-04 | NA | NA | 0.0023 | 0        |
| NM_020064    | BARHL1       | 0                  | 0.442980463425716 | 1      | 2.00E-04 | NA | NA | 0.0023 | 0        |
| NM_182649    | PCNA         | 0                  | 0.442980463425716 | 1      | 2.00E-04 | NA | NA | 0.0023 | 0        |
| NM_001480    | GALR1        | 0                  | 0.443434802362562 | 1      | 2.00E-04 | NA | NA | 0.0023 | 0        |
| NM_001128174 | UGT8         | 0                  | 0.443434802362562 | 1      | 2.00E-04 | NA | NA | 0.0023 | 0        |
| NM_015101    | COLGALT2     | 0.123125851885507  | 0.567469332121763 | 1      | 2.00E-04 | NA | NA | 0.0023 | 0        |
| NM_016306    | DNAJB11      | 0                  | 0.444343480236256 | 1      | 2.00E-04 | NA | NA | 0.0023 | 0        |
| NM_001258334 | HAL          | 0                  | 0.444343480236256 | 1      | 2.00E-04 | NA | NA | 0.0023 | 0        |
| NM_001258333 | HAL          | 0                  | 0.444343480236256 | 1      | 2.00E-04 | NA | NA | 0.0023 | 0        |
| NM_002108    | HAL          | 0                  | 0.444343480236256 | 1      | 2.00E-04 | NA | NA | 0.0023 | 0        |
| NM_012093    | AK5          | 0                  | 0.444797819173103 | 1      | 2.00E-04 | NA | NA | 0.0023 | 0        |
| NM_016468    | COX16        | 0                  | 0.444797819173103 | 1      | 2.00E-04 | NA | NA | 0.0023 | 0        |
| NM_001204090 | COX16        | 0                  | 0.444797819173103 | 1      | 2.00E-04 | NA | NA | 0.0023 | 0        |
| NM_005025    | SERPINI1     | 0                  | 0.44525215810995  | 1      | 2.00E-04 | NA | NA | 0.0023 | 0        |
| NM_198041    | NUDT6        | 0                  | 0.44525215810995  | 1      | 2.00E-04 | NA | NA | 0.0023 | 0        |
| NM_014732    | KIAA0513     | 0                  | 0.445706497046797 | 1      | 2.00E-04 | NA | NA | 0.0023 | 0        |
| NM_001004755 | OR51L1       | 0.0545206724216265 | 0.50068150840527  | 1      | 2.00E-04 | NA | NA | 0.0023 | 0        |
| NM_006258    | PRKG1        | 0                  | 0.446160835983644 | 1      | 2.00E-04 | NA | NA | 0.0023 | 0        |
| NM_001278082 | LOC100652758 | 0                  | 0.446615174920491 | 1      | 2.00E-04 | NA | NA | 0.0023 | 0        |
| NM_001171155 | PET100       | 0                  | 0.447069513857338 | 1      | 2.00E-04 | NA | NA | 0.0023 | 0        |
| NR_033242    | PET100       | 0                  | 0.447069513857338 | 1      | 2.00E-04 | NA | NA | 0.0023 | 0        |
| NM_018008    | FEZF2        | 0                  | 0.447978191731031 | 1      | 2.00E-04 | NA | NA | 0.0023 | 0        |
| NM_020980    | AQP9         | 0                  | 0.448432530667878 | 1      | 2.00E-04 | NA | NA | 0.0023 | 0        |
| NM_002261    | KLRC3        | 0                  | 0.448432530667878 | 1      | 2.00E-04 | NA | NA | 0.0023 | 0        |
| NM_007333    | KLRC3        | 0                  | 0.448432530667878 | 1      | 2.00E-04 | NA | NA | 0.0023 | 0        |
| NM_001098615 | PUS7L        | 0                  | 0.448432530667878 | 1      | 2.00E-04 | NA | NA | 0.0023 | 0        |
| NM_014646    | LPIN2        | 0                  | 0.448432530667878 | 1      | 2.00E-04 | NA | NA | 0.0023 | 0        |
| NM_023001    | ARID4A       | 0                  | 0.448886869604725 | 1      | 2.00E-04 | NA | NA | 0.0023 | 0        |
| NM_023000    | ARID4A       | 0                  | 0.448886869604725 | 1      | 2.00E-04 | NA | NA | 0.0023 | 0        |
| NM_002892    | ARID4A       | 0                  | 0.448886869604725 | 1      | 2.00E-04 | NA | NA | 0.0023 | 0        |
| NM_016180    | SLC45A2      | 0.150840527033167  | 0.600181735574739 | 1      | 2.00E-04 | NA | NA | 0.0023 | 0        |
| NM_001012509 | SLC45A2      | 0.150840527033167  | 0.600181735574739 | 1      | 2.00E-04 | NA | NA | 0.0023 | 0        |



|              |              |                    |                   |   |          |    |    |        |   |
|--------------|--------------|--------------------|-------------------|---|----------|----|----|--------|---|
| NR_024249    | FAM86C2P     | 0                  | 0.449341208541572 | 1 | 2.00E-04 | NA | NA | 0.0023 | 0 |
| NM_005930    | CTAGE5       | 0                  | 0.449795547478419 | 1 | 2.00E-04 | NA | NA | 0.0023 | 0 |
| NM_001247989 | CTAGE5       | 0                  | 0.449795547478419 | 1 | 2.00E-04 | NA | NA | 0.0023 | 0 |
| NM_203355    | CTAGE5       | 0                  | 0.449795547478419 | 1 | 2.00E-04 | NA | NA | 0.0023 | 0 |
| NM_001247990 | CTAGE5       | 0                  | 0.449795547478419 | 1 | 2.00E-04 | NA | NA | 0.0023 | 0 |
| NM_024082    | PRRG3        | 0                  | 0.449795547478419 | 1 | 2.00E-04 | NA | NA | 0.0023 | 0 |
| NM_152647    | FAM227B      | 0                  | 0.449795547478419 | 1 | 2.00E-04 | NA | NA | 0.0023 | 0 |
| NM_016048    | ISOC1        | 0                  | 0.450249886415266 | 1 | 2.00E-04 | NA | NA | 0.0023 | 0 |
| NM_003380    | VIM          | 0                  | 0.450704225352113 | 1 | 2.00E-04 | NA | NA | 0.0023 | 0 |
| NR_002717    | ATXN8OS      | 0                  | 0.450704225352113 | 1 | 2.00E-04 | NA | NA | 0.0023 | 0 |
| NM_013336    | SEC61A1      | 0                  | 0.450704225352113 | 1 | 2.00E-04 | NA | NA | 0.0023 | 0 |
| NM_020367    | PARP11       | 0                  | 0.450704225352113 | 1 | 2.00E-04 | NA | NA | 0.0023 | 0 |
| NM_032849    | MEDAG        | 0                  | 0.45115856428896  | 1 | 2.00E-04 | NA | NA | 0.0023 | 0 |
| NM_139164    | STARD4       | 0                  | 0.453430258973194 | 1 | 2.00E-04 | NA | NA | 0.0023 | 0 |
| NR_037163    | POU2F1       | 0                  | 0.453884597910041 | 1 | 2.00E-04 | NA | NA | 0.0023 | 0 |
| NM_199421    | SOCS4        | 0                  | 0.454338936846888 | 1 | 2.00E-04 | NA | NA | 0.0023 | 0 |
| NM_080867    | SOCS4        | 0                  | 0.454338936846888 | 1 | 2.00E-04 | NA | NA | 0.0023 | 0 |
| NM_001004439 | ITGA11       | 0                  | 0.454338936846888 | 1 | 2.00E-04 | NA | NA | 0.0023 | 0 |
| NM_006529    | GLRA3        | 0                  | 0.454793275783735 | 1 | 2.00E-04 | NA | NA | 0.0023 | 0 |
| NM_001042543 | GLRA3        | 0                  | 0.454793275783735 | 1 | 2.00E-04 | NA | NA | 0.0023 | 0 |
| NR_027503    | LOC100133050 | 0                  | 0.455247614720582 | 1 | 2.00E-04 | NA | NA | 0.0023 | 0 |
| NM_018413    | CHST11       | 0                  | 0.455701953657428 | 1 | 2.00E-04 | NA | NA | 0.0023 | 0 |
| NM_001173982 | CHST11       | 0                  | 0.455701953657428 | 1 | 2.00E-04 | NA | NA | 0.0023 | 0 |
| NM_005657    | TP53BP1      | 0                  | 0.455701953657428 | 1 | 2.00E-04 | NA | NA | 0.0023 | 0 |
| NM_014804    | KIAA0753     | 0                  | 0.455701953657428 | 1 | 2.00E-04 | NA | NA | 0.0023 | 0 |
| NM_194442    | LBR          | 0                  | 0.456156292594275 | 1 | 2.00E-04 | NA | NA | 0.0023 | 0 |
| NM_006628    | ARPP19       | 0                  | 0.456610631531122 | 1 | 2.00E-04 | NA | NA | 0.0023 | 0 |
| NM_001277406 | POTEI        | 0                  | 0.457519309404816 | 1 | 2.00E-04 | NA | NA | 0.0023 | 0 |
| NM_001199111 | MDH1         | 0.0926851431167651 | 0.550658791458428 | 1 | 2.00E-04 | NA | NA | 0.0023 | 0 |
| NM_001199112 | MDH1         | 0.0926851431167651 | 0.550658791458428 | 1 | 2.00E-04 | NA | NA | 0.0023 | 0 |
| NR_027035    | CCDC41-AS1   | 0                  | 0.457973648341663 | 1 | 2.00E-04 | NA | NA | 0.0023 | 0 |
| NM_001278197 | CDK5RAP3     | 0                  | 0.457973648341663 | 1 | 2.00E-04 | NA | NA | 0.0023 | 0 |
| NM_170712    | RASSF1       | 0                  | 0.45842798727851  | 1 | 2.00E-04 | NA | NA | 0.0023 | 0 |
| NR_023348    | GAS8         | 0                  | 0.459336665152204 | 1 | 2.00E-04 | NA | NA | 0.0023 | 0 |
| NM_001481    | GAS8         | 0                  | 0.459336665152204 | 1 | 2.00E-04 | NA | NA | 0.0023 | 0 |
| NR_039849    | MIR4700      | 0                  | 0.45979100408905  | 1 | 2.00E-04 | NA | NA | 0.0023 | 0 |
| NM_020368    | UTP3         | 0                  | 0.460245343025897 | 1 | 2.00E-04 | NA | NA | 0.0023 | 0 |
| NR_026759    | FAM95B1      | 0                  | 0.460245343025897 | 1 | 2.00E-04 | NA | NA | 0.0023 | 0 |
| NM_152278    | TCEAL7       | 0                  | 0.460699681962744 | 1 | 2.00E-04 | NA | NA | 0.0023 | 0 |
| NM_001080542 | FBF1         | 0                  | 0.460699681962744 | 1 | 2.00E-04 | NA | NA | 0.0023 | 0 |
| NR_039789    | MIR4646      | 0                  | 0.460699681962744 | 1 | 2.00E-04 | NA | NA | 0.0023 | 0 |
| NR_029702    | MIR149       | 0                  | 0.461608359836438 | 1 | 2.00E-04 | NA | NA | 0.0023 | 0 |
| NM_175075    | TDRP         | 0                  | 0.462062698773285 | 1 | 2.00E-04 | NA | NA | 0.0023 | 0 |
| NM_001198634 | RUNX1T1      | 0                  | 0.462062698773285 | 1 | 2.00E-04 | NA | NA | 0.0023 | 0 |
| NM_001198627 | RUNX1T1      | 0                  | 0.462062698773285 | 1 | 2.00E-04 | NA | NA | 0.0023 | 0 |
| NM_001198626 | RUNX1T1      | 0                  | 0.462062698773285 | 1 | 2.00E-04 | NA | NA | 0.0023 | 0 |
| NM_001198679 | RUNX1T1      | 0                  | 0.462062698773285 | 1 | 2.00E-04 | NA | NA | 0.0023 | 0 |

|              |                  |   |                   |   |          |    |    |        |   |
|--------------|------------------|---|-------------------|---|----------|----|----|--------|---|
| NM_001198625 | <i>RUNX1T1</i>   | 0 | 0.462062698773285 | 1 | 2.00E-04 | NA | NA | 0.0023 | 0 |
| NM_001198631 | <i>RUNX1T1</i>   | 0 | 0.462062698773285 | 1 | 2.00E-04 | NA | NA | 0.0023 | 0 |
| NM_001122752 | <i>SERPINI1</i>  | 0 | 0.462517037710132 | 1 | 2.00E-04 | NA | NA | 0.0023 | 0 |
| NR_046657    | <i>ZFX-AS1</i>   | 0 | 0.462971376646979 | 1 | 2.00E-04 | NA | NA | 0.0023 | 0 |
| NM_015995    | <i>KLF13</i>     | 0 | 0.463425715583826 | 1 | 2.00E-04 | NA | NA | 0.0023 | 0 |
| NR_002799    | <i>LOC256880</i> | 0 | 0.463880054520672 | 1 | 2.00E-04 | NA | NA | 0.0023 | 0 |
| NM_005032    | <i>PLS3</i>      | 0 | 0.464334393457519 | 1 | 2.00E-04 | NA | NA | 0.0023 | 0 |
| NM_001282337 | <i>PLS3</i>      | 0 | 0.464334393457519 | 1 | 2.00E-04 | NA | NA | 0.0023 | 0 |
| NR_073375    | <i>MCM2</i>      | 0 | 0.464788732394366 | 1 | 2.00E-04 | NA | NA | 0.0023 | 0 |
| NM_004526    | <i>MCM2</i>      | 0 | 0.464788732394366 | 1 | 2.00E-04 | NA | NA | 0.0023 | 0 |
| NR_002976    | <i>SNORA44</i>   | 0 | 0.464788732394366 | 1 | 2.00E-04 | NA | NA | 0.0023 | 0 |
| NM_080725    | <i>SRXN1</i>     | 0 | 0.464788732394366 | 1 | 2.00E-04 | NA | NA | 0.0023 | 0 |
| NM_181356    | <i>SUPT3H</i>    | 0 | 0.46569741026806  | 1 | 2.00E-04 | NA | NA | 0.0023 | 0 |
| NM_003599    | <i>SUPT3H</i>    | 0 | 0.46569741026806  | 1 | 2.00E-04 | NA | NA | 0.0023 | 0 |
| NM_001261823 | <i>SUPT3H</i>    | 0 | 0.46569741026806  | 1 | 2.00E-04 | NA | NA | 0.0023 | 0 |
| NM_005194    | <i>CEBPB</i>     | 0 | 0.466151749204907 | 1 | 2.00E-04 | NA | NA | 0.0023 | 0 |
| NM_199287    | <i>CCDC137</i>   | 0 | 0.466606088141754 | 1 | 2.00E-04 | NA | NA | 0.0023 | 0 |
| NM_003038    | <i>SLC1A4</i>    | 0 | 0.466606088141754 | 1 | 2.00E-04 | NA | NA | 0.0023 | 0 |
| NM_001172562 | <i>INTS9</i>     | 0 | 0.467514766015448 | 1 | 2.00E-04 | NA | NA | 0.0023 | 0 |
| NM_017744    | <i>ST7L</i>      | 0 | 0.467969104952294 | 1 | 2.00E-04 | NA | NA | 0.0023 | 0 |
| NM_138729    | <i>ST7L</i>      | 0 | 0.467969104952294 | 1 | 2.00E-04 | NA | NA | 0.0023 | 0 |
| NM_138728    | <i>ST7L</i>      | 0 | 0.467969104952294 | 1 | 2.00E-04 | NA | NA | 0.0023 | 0 |
| NM_138727    | <i>ST7L</i>      | 0 | 0.467969104952294 | 1 | 2.00E-04 | NA | NA | 0.0023 | 0 |
| NM_147163    | <i>PSMG2</i>     | 0 | 0.469786460699682 | 1 | 2.00E-04 | NA | NA | 0.0023 | 0 |
| NM_054110    | <i>GALNT15</i>   | 0 | 0.469786460699682 | 1 | 2.00E-04 | NA | NA | 0.0023 | 0 |
| NM_031889    | <i>ENAM</i>      | 0 | 0.470240799636529 | 1 | 2.00E-04 | NA | NA | 0.0023 | 0 |
| NM_005760    | <i>CEBPZ</i>     | 0 | 0.470695138573376 | 1 | 2.00E-04 | NA | NA | 0.0023 | 0 |
| NM_001171182 | <i>CENPL</i>     | 0 | 0.47160381644707  | 1 | 2.00E-04 | NA | NA | 0.0023 | 0 |
| NM_174937    | <i>TCERG1L</i>   | 0 | 0.47160381644707  | 1 | 2.00E-04 | NA | NA | 0.0023 | 0 |
| NM_001100388 | <i>C11orf88</i>  | 0 | 0.472058155383916 | 1 | 2.00E-04 | NA | NA | 0.0023 | 0 |
| NM_207430    | <i>C11orf88</i>  | 0 | 0.472058155383916 | 1 | 2.00E-04 | NA | NA | 0.0023 | 0 |
| NM_004415    | <i>DSP</i>       | 0 | 0.472058155383916 | 1 | 2.00E-04 | NA | NA | 0.0023 | 0 |
| NM_001008844 | <i>DSP</i>       | 0 | 0.472058155383916 | 1 | 2.00E-04 | NA | NA | 0.0023 | 0 |
| NR_031722    | <i>MIR103B2</i>  | 0 | 0.472512494320763 | 1 | 2.00E-04 | NA | NA | 0.0023 | 0 |
| NM_001198786 | <i>POU2F1</i>    | 0 | 0.47296683325761  | 1 | 2.00E-04 | NA | NA | 0.0023 | 0 |
| NM_002697    | <i>POU2F1</i>    | 0 | 0.47296683325761  | 1 | 2.00E-04 | NA | NA | 0.0023 | 0 |
| NM_001029863 | <i>C6orf120</i>  | 0 | 0.47296683325761  | 1 | 2.00E-04 | NA | NA | 0.0023 | 0 |
| NM_003651    | <i>YBX3</i>      | 0 | 0.473421172194457 | 1 | 2.00E-04 | NA | NA | 0.0023 | 0 |
| NM_001145426 | <i>YBX3</i>      | 0 | 0.473421172194457 | 1 | 2.00E-04 | NA | NA | 0.0023 | 0 |
| NM_001203244 | <i>SEMA4G</i>    | 0 | 0.473875511131304 | 1 | 2.00E-04 | NA | NA | 0.0023 | 0 |
| NM_017893    | <i>SEMA4G</i>    | 0 | 0.473875511131304 | 1 | 2.00E-04 | NA | NA | 0.0023 | 0 |
| NR_002323    | <i>TUG1</i>      | 0 | 0.474329850068151 | 1 | 2.00E-04 | NA | NA | 0.0023 | 0 |
| NM_001080378 | <i>PACRG</i>     | 0 | 0.474784189004998 | 1 | 2.00E-04 | NA | NA | 0.0023 | 0 |
| NM_152410    | <i>PACRG</i>     | 0 | 0.474784189004998 | 1 | 2.00E-04 | NA | NA | 0.0023 | 0 |
| NM_001198832 | <i>PDE4DIP</i>   | 0 | 0.474784189004998 | 1 | 2.00E-04 | NA | NA | 0.0023 | 0 |
| NM_144994    | <i>ANKRD23</i>   | 0 | 0.475692866878692 | 1 | 2.00E-04 | NA | NA | 0.0023 | 0 |
| NM_030763    | <i>HMGNS</i>     | 0 | 0.475692866878692 | 1 | 2.00E-04 | NA | NA | 0.0023 | 0 |

|              |                     |                   |                   |   |          |    |    |        |   |
|--------------|---------------------|-------------------|-------------------|---|----------|----|----|--------|---|
| NM_001934    | <i>DLX4</i>         | 0                 | 0.476601544752385 | 1 | 2.00E-04 | NA | NA | 0.0023 | 0 |
| NM_001271952 | <i>TPGS2</i>        | 0                 | 0.476601544752385 | 1 | 2.00E-04 | NA | NA | 0.0023 | 0 |
| NM_001271956 | <i>TPGS2</i>        | 0                 | 0.476601544752385 | 1 | 2.00E-04 | NA | NA | 0.0023 | 0 |
| NM_001271950 | <i>TPGS2</i>        | 0                 | 0.476601544752385 | 1 | 2.00E-04 | NA | NA | 0.0023 | 0 |
| NM_001271951 | <i>TPGS2</i>        | 0                 | 0.476601544752385 | 1 | 2.00E-04 | NA | NA | 0.0023 | 0 |
| NM_001271949 | <i>TPGS2</i>        | 0                 | 0.476601544752385 | 1 | 2.00E-04 | NA | NA | 0.0023 | 0 |
| NM_015476    | <i>TPGS2</i>        | 0                 | 0.476601544752385 | 1 | 2.00E-04 | NA | NA | 0.0023 | 0 |
| NM_001271955 | <i>TPGS2</i>        | 0                 | 0.476601544752385 | 1 | 2.00E-04 | NA | NA | 0.0023 | 0 |
| NM_001271954 | <i>TPGS2</i>        | 0                 | 0.476601544752385 | 1 | 2.00E-04 | NA | NA | 0.0023 | 0 |
| NM_001271953 | <i>TPGS2</i>        | 0                 | 0.476601544752385 | 1 | 2.00E-04 | NA | NA | 0.0023 | 0 |
| NM_003469    | <i>SCG2</i>         | 0                 | 0.476601544752385 | 1 | 2.00E-04 | NA | NA | 0.0023 | 0 |
| NM_144587    | <i>BTBD16</i>       | 0                 | 0.477055883689232 | 1 | 2.00E-04 | NA | NA | 0.0023 | 0 |
| NM_025222    | <i>WDR82</i>        | 0                 | 0.477510222626079 | 1 | 2.00E-04 | NA | NA | 0.0023 | 0 |
| NM_001089584 | <i>C5orf49</i>      | 0                 | 0.477510222626079 | 1 | 2.00E-04 | NA | NA | 0.0023 | 0 |
| NM_001167959 | <i>TMEM178A</i>     | 0                 | 0.477964561562926 | 1 | 2.00E-04 | NA | NA | 0.0023 | 0 |
| NM_012141    | <i>INTS6</i>        | 0                 | 0.478418900499773 | 1 | 2.00E-04 | NA | NA | 0.0023 | 0 |
| NM_001039937 | <i>INTS6</i>        | 0                 | 0.478418900499773 | 1 | 2.00E-04 | NA | NA | 0.0023 | 0 |
| NM_001039938 | <i>INTS6</i>        | 0                 | 0.478418900499773 | 1 | 2.00E-04 | NA | NA | 0.0023 | 0 |
| NM_031940    | <i>TM2D2</i>        | 0                 | 0.479327578373467 | 1 | 2.00E-04 | NA | NA | 0.0023 | 0 |
| NM_078473    | <i>TM2D2</i>        | 0                 | 0.479327578373467 | 1 | 2.00E-04 | NA | NA | 0.0023 | 0 |
| NM_001024381 | <i>TM2D2</i>        | 0                 | 0.479327578373467 | 1 | 2.00E-04 | NA | NA | 0.0023 | 0 |
| NM_001024380 | <i>TM2D2</i>        | 0                 | 0.479327578373467 | 1 | 2.00E-04 | NA | NA | 0.0023 | 0 |
| NM_002270    | <i>TNPO1</i>        | 0                 | 0.479781917310313 | 1 | 2.00E-04 | NA | NA | 0.0023 | 0 |
| NM_213566    | <i>DFFA</i>         | 0                 | 0.479781917310313 | 1 | 2.00E-04 | NA | NA | 0.0023 | 0 |
| NM_004401    | <i>DFFA</i>         | 0                 | 0.479781917310313 | 1 | 2.00E-04 | NA | NA | 0.0023 | 0 |
| NM_201559    | <i>FOXO3</i>        | 0                 | 0.48023625624716  | 1 | 2.00E-04 | NA | NA | 0.0023 | 0 |
| NM_000067    | <i>CA2</i>          | 0                 | 0.48023625624716  | 1 | 2.00E-04 | NA | NA | 0.0023 | 0 |
| NM_182836    | <i>RABGGTA</i>      | 0                 | 0.48023625624716  | 1 | 2.00E-04 | NA | NA | 0.0023 | 0 |
| NM_004581    | <i>RABGGTA</i>      | 0                 | 0.48023625624716  | 1 | 2.00E-04 | NA | NA | 0.0023 | 0 |
| NM_001105247 | <i>ARMC5</i>        | 0                 | 0.481144934120854 | 1 | 2.00E-04 | NA | NA | 0.0023 | 0 |
| NM_024742    | <i>ARMC5</i>        | 0                 | 0.481144934120854 | 1 | 2.00E-04 | NA | NA | 0.0023 | 0 |
| NM_005923    | <i>MAP3K5</i>       | 0                 | 0.481599273057701 | 1 | 2.00E-04 | NA | NA | 0.0023 | 0 |
| NM_004300    | <i>ACP1</i>         | 0                 | 0.482507950931395 | 1 | 2.00E-04 | NA | NA | 0.0023 | 0 |
| NM_001040649 | <i>ACP1</i>         | 0                 | 0.482507950931395 | 1 | 2.00E-04 | NA | NA | 0.0023 | 0 |
| NM_007099    | <i>ACP1</i>         | 0                 | 0.482507950931395 | 1 | 2.00E-04 | NA | NA | 0.0023 | 0 |
| NR_024080    | <i>ACP1</i>         | 0                 | 0.482507950931395 | 1 | 2.00E-04 | NA | NA | 0.0023 | 0 |
| NM_018988    | <i>GFOD1</i>        | 0                 | 0.482507950931395 | 1 | 2.00E-04 | NA | NA | 0.0023 | 0 |
| NM_001242629 | <i>GFOD1</i>        | 0                 | 0.482507950931395 | 1 | 2.00E-04 | NA | NA | 0.0023 | 0 |
| NM_017737    | <i>FNBP1L</i>       | 0                 | 0.482962289868242 | 1 | 2.00E-04 | NA | NA | 0.0023 | 0 |
| NM_001024948 | <i>FNBP1L</i>       | 0                 | 0.482962289868242 | 1 | 2.00E-04 | NA | NA | 0.0023 | 0 |
| NM_001164473 | <i>FNBP1L</i>       | 0                 | 0.482962289868242 | 1 | 2.00E-04 | NA | NA | 0.0023 | 0 |
| NM_001257390 | <i>CD63</i>         | 0                 | 0.482962289868242 | 1 | 2.00E-04 | NA | NA | 0.0023 | 0 |
| NM_001193493 | <i>SLC1A4</i>       | 0.114039073148569 | 0.597455701953657 | 1 | 2.00E-04 | NA | NA | 0.0023 | 0 |
| NM_025079    | <i>ZC3H12A</i>      | 0                 | 0.483416628805089 | 1 | 2.00E-04 | NA | NA | 0.0023 | 0 |
| NR_033990    | <i>LOC100129138</i> | 0                 | 0.483416628805089 | 1 | 2.00E-04 | NA | NA | 0.0023 | 0 |
| NM_004725    | <i>BUB3</i>         | 0                 | 0.483416628805089 | 1 | 2.00E-04 | NA | NA | 0.0023 | 0 |
| NM_001007793 | <i>BUB3</i>         | 0                 | 0.483416628805089 | 1 | 2.00E-04 | NA | NA | 0.0023 | 0 |

|              |              |                    |                   |   |          |    |    |        |   |
|--------------|--------------|--------------------|-------------------|---|----------|----|----|--------|---|
| NM_004231    | ATP6V1F      | 0                  | 0.483870967741935 | 1 | 2.00E-04 | NA | NA | 0.0023 | 0 |
| NM_001198909 | ATP6V1F      | 0                  | 0.483870967741935 | 1 | 2.00E-04 | NA | NA | 0.0023 | 0 |
| NM_000325    | PITX2        | 0                  | 0.483870967741935 | 1 | 2.00E-04 | NA | NA | 0.0023 | 0 |
| NM_015933    | TMA7         | 0.0540663334847796 | 0.537937301226715 | 1 | 2.00E-04 | NA | NA | 0.0023 | 0 |
| NM_152432    | ARHGAP42     | 0                  | 0.485688323489323 | 1 | 2.00E-04 | NA | NA | 0.0023 | 0 |
| NM_005228    | EGFR         | 0                  | 0.485688323489323 | 1 | 2.00E-04 | NA | NA | 0.0023 | 0 |
| NM_201284    | EGFR         | 0                  | 0.485688323489323 | 1 | 2.00E-04 | NA | NA | 0.0023 | 0 |
| NM_201283    | EGFR         | 0                  | 0.485688323489323 | 1 | 2.00E-04 | NA | NA | 0.0023 | 0 |
| NM_201282    | EGFR         | 0                  | 0.485688323489323 | 1 | 2.00E-04 | NA | NA | 0.0023 | 0 |
| NM_001278    | CHUK         | 0                  | 0.48614266242617  | 1 | 2.00E-04 | NA | NA | 0.0023 | 0 |
| NM_002500    | NEUROD1      | 0                  | 0.487051340299864 | 1 | 2.00E-04 | NA | NA | 0.0023 | 0 |
| NM_015384    | NIPBL        | 0                  | 0.491140390731486 | 1 | 2.00E-04 | NA | NA | 0.0023 | 0 |
| NM_133433    | NIPBL        | 0                  | 0.491140390731486 | 1 | 2.00E-04 | NA | NA | 0.0023 | 0 |
| NM_003833    | MATN4        | 0                  | 0.491140390731486 | 1 | 2.00E-04 | NA | NA | 0.0023 | 0 |
| NM_030590    | MATN4        | 0                  | 0.491140390731486 | 1 | 2.00E-04 | NA | NA | 0.0023 | 0 |
| NM_030592    | MATN4        | 0                  | 0.491140390731486 | 1 | 2.00E-04 | NA | NA | 0.0023 | 0 |
| NM_021972    | SPHK1        | 0                  | 0.492503407542026 | 1 | 2.00E-04 | NA | NA | 0.0023 | 0 |
| NM_001142601 | SPHK1        | 0                  | 0.492503407542026 | 1 | 2.00E-04 | NA | NA | 0.0023 | 0 |
| NM_182965    | SPHK1        | 0                  | 0.492503407542026 | 1 | 2.00E-04 | NA | NA | 0.0023 | 0 |
| NM_001242936 | FAM47E       | 0                  | 0.492503407542026 | 1 | 2.00E-04 | NA | NA | 0.0023 | 0 |
| NM_001040412 | C9orf131     | 0                  | 0.49341208541572  | 1 | 2.00E-04 | NA | NA | 0.0023 | 0 |
| NM_001040411 | C9orf131     | 0                  | 0.49341208541572  | 1 | 2.00E-04 | NA | NA | 0.0023 | 0 |
| NM_173495    | PTCHD1       | 0                  | 0.49341208541572  | 1 | 2.00E-04 | NA | NA | 0.0023 | 0 |
| NR_026769    | PPBPP2       | 0                  | 0.49341208541572  | 1 | 2.00E-04 | NA | NA | 0.0023 | 0 |
| NR_034015    | LOC100131060 | 0                  | 0.493866424352567 | 1 | 2.00E-04 | NA | NA | 0.0023 | 0 |
| NR_034014    | LOC100131060 | 0                  | 0.493866424352567 | 1 | 2.00E-04 | NA | NA | 0.0023 | 0 |
| NM_138796    | SPATA17      | 0                  | 0.494320763289414 | 1 | 2.00E-04 | NA | NA | 0.0023 | 0 |
| NM_174944    | TSSK4        | 0                  | 0.494320763289414 | 1 | 2.00E-04 | NA | NA | 0.0023 | 0 |
| NM_001184739 | TSSK4        | 0                  | 0.494320763289414 | 1 | 2.00E-04 | NA | NA | 0.0023 | 0 |
| NM_006608    | PHTF1        | 0                  | 0.495229441163108 | 1 | 2.00E-04 | NA | NA | 0.0023 | 0 |
| NM_001282793 | FILIP1L      | 0                  | 0.495229441163108 | 1 | 2.00E-04 | NA | NA | 0.0023 | 0 |
| NM_001282794 | FILIP1L      | 0                  | 0.495229441163108 | 1 | 2.00E-04 | NA | NA | 0.0023 | 0 |
| NM_014890    | FILIP1L      | 0                  | 0.495229441163108 | 1 | 2.00E-04 | NA | NA | 0.0023 | 0 |
| NM_001193350 | MEF2C        | 0.119945479327578  | 0.615629259427533 | 1 | 2.00E-04 | NA | NA | 0.0023 | 0 |
| NM_002397    | MEF2C        | 0.119945479327578  | 0.615629259427533 | 1 | 2.00E-04 | NA | NA | 0.0023 | 0 |
| NM_001282805 | MARCH7       | 0                  | 0.496138119036801 | 1 | 2.00E-04 | NA | NA | 0.0023 | 0 |
| NM_001282806 | MARCH7       | 0                  | 0.496138119036801 | 1 | 2.00E-04 | NA | NA | 0.0023 | 0 |
| NM_022826    | MARCH7       | 0                  | 0.496138119036801 | 1 | 2.00E-04 | NA | NA | 0.0023 | 0 |
| NM_012302    | LPHN2        | 0                  | 0.496592457973648 | 1 | 2.00E-04 | NA | NA | 0.0023 | 0 |
| NM_207645    | C11orf87     | 0                  | 0.496592457973648 | 1 | 2.00E-04 | NA | NA | 0.0023 | 0 |
| NR_039785    | MIR4642      | 0                  | 0.496592457973648 | 1 | 2.00E-04 | NA | NA | 0.0023 | 0 |
| NM_003836    | DLK1         | 0                  | 0.497955474784189 | 1 | 2.00E-04 | NA | NA | 0.0023 | 0 |
| NM_006441    | MTHFS        | 0                  | 0.499772830531577 | 1 | 2.00E-04 | NA | NA | 0.0023 | 0 |
| NM_001127713 | ATL1         | 0                  | 0.500227169468423 | 1 | 2.00E-04 | NA | NA | 0.0023 | 0 |
| NM_012081    | ELL2         | 0                  | 0.500227169468423 | 1 | 2.00E-04 | NA | NA | 0.0023 | 0 |
| NR_104015    | TMED1        | 0                  | 0.50068150840527  | 1 | 2.00E-04 | NA | NA | 0.0023 | 0 |
| NM_024646    | ZYG11B       | 0                  | 0.501135847342117 | 1 | 2.00E-04 | NA | NA | 0.0023 | 0 |

|              |               |                    |                   |   |          |    |    |        |   |
|--------------|---------------|--------------------|-------------------|---|----------|----|----|--------|---|
| NR_039755    | MIR4530       | 0                  | 0.501135847342117 | 1 | 2.00E-04 | NA | NA | 0.0023 | 0 |
| NM_001104    | ACTN3         | 0                  | 0.502498864152658 | 1 | 2.00E-04 | NA | NA | 0.0023 | 0 |
| NR_047663    | ACTN3         | 0                  | 0.502498864152658 | 1 | 2.00E-04 | NA | NA | 0.0023 | 0 |
| NM_002033    | FUT4          | 0                  | 0.502498864152658 | 1 | 2.00E-04 | NA | NA | 0.0023 | 0 |
| NM_031896    | CACNG7        | 0                  | 0.502953203089505 | 1 | 2.00E-04 | NA | NA | 0.0023 | 0 |
| NR_003716    | HOTAIR        | 0                  | 0.503861880963199 | 1 | 2.00E-04 | NA | NA | 0.0023 | 0 |
| NM_079422    | MYL1          | 0                  | 0.503861880963199 | 1 | 2.00E-04 | NA | NA | 0.0023 | 0 |
| NM_001172626 | AMPD1         | 0                  | 0.505224897773739 | 1 | 2.00E-04 | NA | NA | 0.0023 | 0 |
| NM_000036    | AMPD1         | 0                  | 0.505224897773739 | 1 | 2.00E-04 | NA | NA | 0.0023 | 0 |
| NM_001272038 | RAB13         | 0                  | 0.505679236710586 | 1 | 2.00E-04 | NA | NA | 0.0023 | 0 |
| NM_145257    | CCSAP         | 0                  | 0.505679236710586 | 1 | 2.00E-04 | NA | NA | 0.0023 | 0 |
| NR_026590    | CDYL          | 0                  | 0.506133575647433 | 1 | 2.00E-04 | NA | NA | 0.0023 | 0 |
| NR_104226    | SH3YL1        | 0                  | 0.507042253521127 | 1 | 2.00E-04 | NA | NA | 0.0023 | 0 |
| NM_002840    | PTPRF         | 0                  | 0.507496592457974 | 1 | 2.00E-04 | NA | NA | 0.0023 | 0 |
| NM_130440    | PTPRF         | 0                  | 0.507496592457974 | 1 | 2.00E-04 | NA | NA | 0.0023 | 0 |
| NM_015714    | GOS2          | 0                  | 0.507496592457974 | 1 | 2.00E-04 | NA | NA | 0.0023 | 0 |
| NM_001278216 | CDK5RAP3      | 0                  | 0.507496592457974 | 1 | 2.00E-04 | NA | NA | 0.0023 | 0 |
| NM_176096    | CDK5RAP3      | 0                  | 0.507496592457974 | 1 | 2.00E-04 | NA | NA | 0.0023 | 0 |
| NM_001278198 | CDK5RAP3      | 0                  | 0.507496592457974 | 1 | 2.00E-04 | NA | NA | 0.0023 | 0 |
| NM_001278217 | CDK5RAP3      | 0                  | 0.507496592457974 | 1 | 2.00E-04 | NA | NA | 0.0023 | 0 |
| NM_001243611 | LMO3          | 0                  | 0.507496592457974 | 1 | 2.00E-04 | NA | NA | 0.0023 | 0 |
| NM_001165921 | SERPINF2      | 0                  | 0.507950931394821 | 1 | 2.00E-04 | NA | NA | 0.0023 | 0 |
| NM_000934    | SERPINF2      | 0                  | 0.507950931394821 | 1 | 2.00E-04 | NA | NA | 0.0023 | 0 |
| NR_038943    | ADD3-AS1      | 0                  | 0.507950931394821 | 1 | 2.00E-04 | NA | NA | 0.0023 | 0 |
| NM_001039876 | SYNE4         | 0                  | 0.507950931394821 | 1 | 2.00E-04 | NA | NA | 0.0023 | 0 |
| NM_004170    | SLC1A1        | 0                  | 0.508405270331667 | 1 | 2.00E-04 | NA | NA | 0.0023 | 0 |
| NM_198867    | ALKBH6        | 0                  | 0.508405270331667 | 1 | 2.00E-04 | NA | NA | 0.0023 | 0 |
| NM_032878    | ALKBH6        | 0                  | 0.508405270331667 | 1 | 2.00E-04 | NA | NA | 0.0023 | 0 |
| NM_057749    | CCNE2         | 0                  | 0.509313948205361 | 1 | 2.00E-04 | NA | NA | 0.0023 | 0 |
| NM_001164761 | PRKAR1B       | 0                  | 0.510676965015902 | 1 | 2.00E-04 | NA | NA | 0.0023 | 0 |
| NM_002051    | GATA3         | 0                  | 0.511585642889596 | 1 | 2.00E-04 | NA | NA | 0.0023 | 0 |
| NM_001002295 | GATA3         | 0                  | 0.511585642889596 | 1 | 2.00E-04 | NA | NA | 0.0023 | 0 |
| NM_001172774 | DPY19L3       | 0                  | 0.511585642889596 | 1 | 2.00E-04 | NA | NA | 0.0023 | 0 |
| NM_017813    | IMPAD1        | 0                  | 0.512948659700136 | 1 | 2.00E-04 | NA | NA | 0.0023 | 0 |
| NM_001005174 | OR52N2        | 0                  | 0.514311676510677 | 1 | 2.00E-04 | NA | NA | 0.0023 | 0 |
| NM_032594    | INSM2         | 0                  | 0.514311676510677 | 1 | 2.00E-04 | NA | NA | 0.0023 | 0 |
| NM_001278554 | UBE2E3        | 0                  | 0.514766015447524 | 1 | 2.00E-04 | NA | NA | 0.0023 | 0 |
| NM_014789    | ZNF623        | 0.0436165379373012 | 0.559291231258519 | 1 | 2.00E-04 | NA | NA | 0.0023 | 0 |
| NM_005160    | ADRBK2        | 0                  | 0.515674693321218 | 1 | 2.00E-04 | NA | NA | 0.0023 | 0 |
| NM_001015882 | DNAJC25       | 0                  | 0.516129032258065 | 1 | 2.00E-04 | NA | NA | 0.0023 | 0 |
| NR_037148    | DNAJC25       | 0                  | 0.516129032258065 | 1 | 2.00E-04 | NA | NA | 0.0023 | 0 |
| NM_004125    | DNAJC25-GNG10 | 0                  | 0.516129032258065 | 1 | 2.00E-04 | NA | NA | 0.0023 | 0 |
| NR_033965    | EIF1B-AS1     | 0                  | 0.516583371194911 | 1 | 2.00E-04 | NA | NA | 0.0023 | 0 |
| NM_017832    | FAM206A       | 0                  | 0.518400726942299 | 1 | 2.00E-04 | NA | NA | 0.0023 | 0 |
| NM_017975    | ZWILCH        | 0                  | 0.519309404815993 | 1 | 2.00E-04 | NA | NA | 0.0023 | 0 |
| NR_003105    | ZWILCH        | 0                  | 0.519309404815993 | 1 | 2.00E-04 | NA | NA | 0.0023 | 0 |
| NM_002735    | PRKAR1B       | 0                  | 0.519309404815993 | 1 | 2.00E-04 | NA | NA | 0.0023 | 0 |

|              |              |                    |                   |   |          |    |    |        |   |
|--------------|--------------|--------------------|-------------------|---|----------|----|----|--------|---|
| NM_001164762 | PRKAR1B      | 0                  | 0.519309404815993 | 1 | 2.00E-04 | NA | NA | 0.0023 | 0 |
| NM_007159    | SLMAP        | 0                  | 0.51976374375284  | 1 | 2.00E-04 | NA | NA | 0.0023 | 0 |
| NR_002441    | SNORD18A     | 0                  | 0.520672421626533 | 1 | 2.00E-04 | NA | NA | 0.0023 | 0 |
| NM_001164586 | IGFN1        | 0                  | 0.52112676056338  | 1 | 2.00E-04 | NA | NA | 0.0023 | 0 |
| NM_001130406 | PRR20D       | 0                  | 0.521581099500227 | 1 | 2.00E-04 | NA | NA | 0.0023 | 0 |
| NM_018907    | PCDHA4       | 0                  | 0.522944116310768 | 1 | 2.00E-04 | NA | NA | 0.0023 | 0 |
| NM_031500    | PCDHA4       | 0                  | 0.522944116310768 | 1 | 2.00E-04 | NA | NA | 0.0023 | 0 |
| NM_000358    | TGFBI        | 0                  | 0.523398455247615 | 1 | 2.00E-04 | NA | NA | 0.0023 | 0 |
| NR_037654    | MTHFS        | 0                  | 0.523398455247615 | 1 | 2.00E-04 | NA | NA | 0.0023 | 0 |
| NM_172337    | OTX2         | 0                  | 0.524761472058155 | 1 | 2.00E-04 | NA | NA | 0.0023 | 0 |
| NM_001270525 | OTX2         | 0                  | 0.524761472058155 | 1 | 2.00E-04 | NA | NA | 0.0023 | 0 |
| NR_073036    | OTX2         | 0                  | 0.524761472058155 | 1 | 2.00E-04 | NA | NA | 0.0023 | 0 |
| NM_017704    | ANKRD49      | 0                  | 0.525215810995002 | 1 | 2.00E-04 | NA | NA | 0.0023 | 0 |
| NM_018140    | CEP72        | 0                  | 0.525670149931849 | 1 | 2.00E-04 | NA | NA | 0.0023 | 0 |
| NM_182594    | ZNF454       | 0                  | 0.52703316674239  | 1 | 2.00E-04 | NA | NA | 0.0023 | 0 |
| NM_001178090 | ZNF454       | 0                  | 0.52703316674239  | 1 | 2.00E-04 | NA | NA | 0.0023 | 0 |
| NM_001178089 | ZNF454       | 0                  | 0.52703316674239  | 1 | 2.00E-04 | NA | NA | 0.0023 | 0 |
| NR_033857    | LOC100288974 | 0                  | 0.528850522489777 | 1 | 2.00E-04 | NA | NA | 0.0023 | 0 |
| NM_017941    | C17orf80     | 0                  | 0.528850522489777 | 1 | 2.00E-04 | NA | NA | 0.0023 | 0 |
| NM_001100622 | C17orf80     | 0                  | 0.528850522489777 | 1 | 2.00E-04 | NA | NA | 0.0023 | 0 |
| NM_001100621 | C17orf80     | 0                  | 0.528850522489777 | 1 | 2.00E-04 | NA | NA | 0.0023 | 0 |
| NM_032804    | ADO          | 0                  | 0.531576556110859 | 1 | 2.00E-04 | NA | NA | 0.0023 | 0 |
| NM_001007189 | IGIP         | 0                  | 0.532030895047706 | 1 | 2.00E-04 | NA | NA | 0.0023 | 0 |
| NM_002959    | SORT1        | 0                  | 0.532485233984552 | 1 | 2.00E-04 | NA | NA | 0.0023 | 0 |
| NM_006698    | BLCAP        | 0.0495229441163108 | 0.582008178100863 | 1 | 2.00E-04 | NA | NA | 0.0023 | 0 |
| NM_001167820 | BLCAP        | 0.0495229441163108 | 0.582008178100863 | 1 | 2.00E-04 | NA | NA | 0.0023 | 0 |
| NM_003400    | XPO1         | 0                  | 0.532939572921399 | 1 | 2.00E-04 | NA | NA | 0.0023 | 0 |
| NM_023918    | TAS2R8       | 0                  | 0.533848250795093 | 1 | 2.00E-04 | NA | NA | 0.0023 | 0 |
| NM_001008707 | EML1         | 0                  | 0.53430258973194  | 1 | 2.00E-04 | NA | NA | 0.0023 | 0 |
| NM_004434    | EML1         | 0                  | 0.53430258973194  | 1 | 2.00E-04 | NA | NA | 0.0023 | 0 |
| NM_198402    | PTPLB        | 0                  | 0.53430258973194  | 1 | 2.00E-04 | NA | NA | 0.0023 | 0 |
| NM_175055    | HIST3H2BB    | 0                  | 0.535665606542481 | 1 | 2.00E-04 | NA | NA | 0.0023 | 0 |
| NM_001242877 | ELP2         | 0                  | 0.536119945479328 | 1 | 2.00E-04 | NA | NA | 0.0023 | 0 |
| NM_001242876 | ELP2         | 0                  | 0.536119945479328 | 1 | 2.00E-04 | NA | NA | 0.0023 | 0 |
| NM_001242875 | ELP2         | 0                  | 0.536119945479328 | 1 | 2.00E-04 | NA | NA | 0.0023 | 0 |
| NM_001242879 | ELP2         | 0                  | 0.536119945479328 | 1 | 2.00E-04 | NA | NA | 0.0023 | 0 |
| NM_001242878 | ELP2         | 0                  | 0.536119945479328 | 1 | 2.00E-04 | NA | NA | 0.0023 | 0 |
| NR_040110    | ELP2         | 0                  | 0.536119945479328 | 1 | 2.00E-04 | NA | NA | 0.0023 | 0 |
| NM_018255    | ELP2         | 0                  | 0.536119945479328 | 1 | 2.00E-04 | NA | NA | 0.0023 | 0 |
| NM_001135598 | CLHC1        | 0                  | 0.536119945479328 | 1 | 2.00E-04 | NA | NA | 0.0023 | 0 |
| NM_019886    | CHST7        | 0                  | 0.537028623353021 | 1 | 2.00E-04 | NA | NA | 0.0023 | 0 |
| NM_001145453 | GFRA1        | 0                  | 0.537028623353021 | 1 | 2.00E-04 | NA | NA | 0.0023 | 0 |
| NM_021957    | GY52         | 0                  | 0.537482962289868 | 1 | 2.00E-04 | NA | NA | 0.0023 | 0 |
| NM_001278512 | AP3B2        | 0                  | 0.537482962289868 | 1 | 2.00E-04 | NA | NA | 0.0023 | 0 |
| NM_004644    | AP3B2        | 0                  | 0.537482962289868 | 1 | 2.00E-04 | NA | NA | 0.0023 | 0 |
| NM_001278511 | AP3B2        | 0                  | 0.537482962289868 | 1 | 2.00E-04 | NA | NA | 0.0023 | 0 |
| NM_198998    | AQP12A       | 0                  | 0.537937301226715 | 1 | 2.00E-04 | NA | NA | 0.0023 | 0 |

|              |          |                    |                   |   |          |    |    |        |   |
|--------------|----------|--------------------|-------------------|---|----------|----|----|--------|---|
| NM_178525    | ACTL9    | 0                  | 0.539300318037256 | 1 | 2.00E-04 | NA | NA | 0.0023 | 0 |
| NM_000111    | SLC26A3  | 0                  | 0.539300318037256 | 1 | 2.00E-04 | NA | NA | 0.0023 | 0 |
| NM_194250    | ZNF804A  | 0                  | 0.542480690595184 | 1 | 2.00E-04 | NA | NA | 0.0023 | 0 |
| NM_030810    | TXNDC5   | 0                  | 0.543389368468878 | 1 | 2.00E-04 | NA | NA | 0.0023 | 0 |
| NM_006522    | WNT6     | 0                  | 0.544298046342572 | 1 | 2.00E-04 | NA | NA | 0.0023 | 0 |
| NM_001271685 | SLC35A3  | 0                  | 0.544752385279418 | 1 | 2.00E-04 | NA | NA | 0.0023 | 0 |
| NM_001193461 | MSRB3    | 0                  | 0.544752385279418 | 1 | 2.00E-04 | NA | NA | 0.0023 | 0 |
| NM_020661    | AICDA    | 0                  | 0.544752385279418 | 1 | 2.00E-04 | NA | NA | 0.0023 | 0 |
| NM_031420    | MRPL9    | 0                  | 0.545206724216265 | 1 | 2.00E-04 | NA | NA | 0.0023 | 0 |
| NM_001257401 | CD63     | 0                  | 0.546569741026806 | 1 | 2.00E-04 | NA | NA | 0.0023 | 0 |
| NM_001257400 | CD63     | 0                  | 0.546569741026806 | 1 | 2.00E-04 | NA | NA | 0.0023 | 0 |
| NM_152697    | SLC44A5  | 0                  | 0.547024079963653 | 1 | 2.00E-04 | NA | NA | 0.0023 | 0 |
| NM_001130058 | SLC44A5  | 0                  | 0.547024079963653 | 1 | 2.00E-04 | NA | NA | 0.0023 | 0 |
| NM_003671    | CDC14B   | 0                  | 0.5474784189005   | 1 | 2.00E-04 | NA | NA | 0.0023 | 0 |
| NM_033331    | CDC14B   | 0                  | 0.5474784189005   | 1 | 2.00E-04 | NA | NA | 0.0023 | 0 |
| NM_003707    | RUVBL1   | 0.0190822353475693 | 0.567014993184916 | 1 | 2.00E-04 | NA | NA | 0.0023 | 0 |
| NM_006357    | UBE2E3   | 0                  | 0.550204452521581 | 1 | 2.00E-04 | NA | NA | 0.0023 | 0 |
| NM_001278555 | UBE2E3   | 0                  | 0.550204452521581 | 1 | 2.00E-04 | NA | NA | 0.0023 | 0 |
| NM_182678    | UBE2E3   | 0                  | 0.550204452521581 | 1 | 2.00E-04 | NA | NA | 0.0023 | 0 |
| NM_001005566 | OR5B2    | 0                  | 0.550658791458428 | 1 | 2.00E-04 | NA | NA | 0.0023 | 0 |
| NM_001040431 | COA3     | 0                  | 0.551113130395275 | 1 | 2.00E-04 | NA | NA | 0.0023 | 0 |
| NM_001256475 | THEGL    | 0                  | 0.552021808268969 | 1 | 2.00E-04 | NA | NA | 0.0023 | 0 |
| NM_001145030 | TOPAZ1   | 0                  | 0.553839164016356 | 1 | 2.00E-04 | NA | NA | 0.0023 | 0 |
| NM_020873    | LRRN1    | 0                  | 0.554293502953203 | 1 | 2.00E-04 | NA | NA | 0.0023 | 0 |
| NM_007080    | LSM6     | 0                  | 0.55474784189005  | 1 | 2.00E-04 | NA | NA | 0.0023 | 0 |
| NR_001282    | PCDHB19P | 0.0204452521581099 | 0.578827805542935 | 1 | 2.00E-04 | NA | NA | 0.0023 | 0 |
| NM_001257391 | CD63     | 0                  | 0.559291231258519 | 1 | 2.00E-04 | NA | NA | 0.0023 | 0 |
| NM_032326    | TMEM175  | 0                  | 0.56065424806906  | 1 | 2.00E-04 | NA | NA | 0.0023 | 0 |
| NM_178468    | FAM83C   | 0                  | 0.564743298500682 | 1 | 2.00E-04 | NA | NA | 0.0023 | 0 |
| NM_153347    | TMEM86A  | 0                  | 0.565651976374375 | 1 | 2.00E-04 | NA | NA | 0.0023 | 0 |
| NM_013368    | SERTAD3  | 0                  | 0.565651976374375 | 1 | 2.00E-04 | NA | NA | 0.0023 | 0 |
| NR_027927    | COL6A4P1 | 0                  | 0.565651976374375 | 1 | 2.00E-04 | NA | NA | 0.0023 | 0 |
| NM_182633    | ZNF713   | 0                  | 0.567469332121763 | 1 | 2.00E-04 | NA | NA | 0.0023 | 0 |
| NM_001005479 | OR5H6    | 0                  | 0.56792367105861  | 1 | 2.00E-04 | NA | NA | 0.0023 | 0 |
| NM_152721    | DOK6     | 0                  | 0.568832348932303 | 1 | 2.00E-04 | NA | NA | 0.0023 | 0 |
| NM_001204269 | KCNA2    | 0                  | 0.568832348932303 | 1 | 2.00E-04 | NA | NA | 0.0023 | 0 |
| NM_014452    | TNFRSF21 | 0                  | 0.569741026805997 | 1 | 2.00E-04 | NA | NA | 0.0023 | 0 |
| NM_000766    | CYP2A13  | 0                  | 0.572921399363925 | 1 | 2.00E-04 | NA | NA | 0.0023 | 0 |
| NM_001080379 | PACRG    | 0                  | 0.572921399363925 | 1 | 2.00E-04 | NA | NA | 0.0023 | 0 |
| NM_001113206 | TSTD1    | 0                  | 0.573830077237619 | 1 | 2.00E-04 | NA | NA | 0.0023 | 0 |
| NM_001113205 | TSTD1    | 0                  | 0.573830077237619 | 1 | 2.00E-04 | NA | NA | 0.0023 | 0 |
| NM_001113207 | TSTD1    | 0                  | 0.573830077237619 | 1 | 2.00E-04 | NA | NA | 0.0023 | 0 |
| NM_005141    | FGF      | 0                  | 0.576101771921854 | 1 | 2.00E-04 | NA | NA | 0.0023 | 0 |
| NM_001184741 | FGF      | 0                  | 0.576101771921854 | 1 | 2.00E-04 | NA | NA | 0.0023 | 0 |
| NM_152284    | CHMP4C   | 0                  | 0.577010449795547 | 1 | 2.00E-04 | NA | NA | 0.0023 | 0 |
| NR_039624    | MIR4426  | 0                  | 0.578827805542935 | 1 | 2.00E-04 | NA | NA | 0.0023 | 0 |
| NM_001619    | ADRBK1   | 0                  | 0.579282144479782 | 1 | 2.00E-04 | NA | NA | 0.0023 | 0 |

|              |            |                     |                   |   |          |    |    |        |   |
|--------------|------------|---------------------|-------------------|---|----------|----|----|--------|---|
| NM_152385    | CLHC1      | 0                   | 0.580190822353476 | 1 | 2.00E-04 | NA | NA | 0.0023 | 0 |
| NM_015425    | POLR1A     | 0                   | 0.582008178100863 | 1 | 2.00E-04 | NA | NA | 0.0023 | 0 |
| NM_001167822 | BLCAP      | 0                   | 0.582008178100863 | 1 | 2.00E-04 | NA | NA | 0.0023 | 0 |
| NM_001167821 | BLCAP      | 0                   | 0.582008178100863 | 1 | 2.00E-04 | NA | NA | 0.0023 | 0 |
| NM_016300    | ARPP21     | 0                   | 0.58246251703771  | 1 | 2.00E-04 | NA | NA | 0.0023 | 0 |
| NM_000209    | PDX1       | 0                   | 0.582916855974557 | 1 | 2.00E-04 | NA | NA | 0.0023 | 0 |
| NM_001428    | ENO1       | 0                   | 0.583825533848251 | 1 | 2.00E-04 | NA | NA | 0.0023 | 0 |
| NM_001190470 | MTRNR2L2   | 0.0581553839164016  | 0.643343934575193 | 1 | 2.00E-04 | NA | NA | 0.0023 | 0 |
| NM_021973    | HAND2      | 0                   | 0.587005906406179 | 1 | 2.00E-04 | NA | NA | 0.0023 | 0 |
| NM_022366    | TFB2M      | 0                   | 0.588823262153567 | 1 | 2.00E-04 | NA | NA | 0.0023 | 0 |
| NM_001079910 | LRRIQ1     | 0.00318037255792821 | 0.592457973648342 | 1 | 2.00E-04 | NA | NA | 0.0023 | 0 |
| NM_000905    | NPY        | 0                   | 0.593820990458882 | 1 | 2.00E-04 | NA | NA | 0.0023 | 0 |
| NM_001199899 | PDK2       | 0                   | 0.594275329395729 | 1 | 2.00E-04 | NA | NA | 0.0023 | 0 |
| NR_038248    | ZNF571-AS1 | 0                   | 0.595184007269423 | 1 | 2.00E-04 | NA | NA | 0.0023 | 0 |
| NR_038247    | ZNF571-AS1 | 0                   | 0.595184007269423 | 1 | 2.00E-04 | NA | NA | 0.0023 | 0 |
| NM_001257392 | CD63       | 0                   | 0.595184007269423 | 1 | 2.00E-04 | NA | NA | 0.0023 | 0 |
| NM_012431    | SEMA3E     | 0                   | 0.595184007269423 | 1 | 2.00E-04 | NA | NA | 0.0023 | 0 |
| NR_029842    | MIR301A    | 0                   | 0.596092685143117 | 1 | 2.00E-04 | NA | NA | 0.0023 | 0 |
| NM_000586    | IL2        | 0                   | 0.596092685143117 | 1 | 2.00E-04 | NA | NA | 0.0023 | 0 |
| NM_005640    | TAF4B      | 0                   | 0.599273057701045 | 1 | 2.00E-04 | NA | NA | 0.0023 | 0 |
| NM_006242    | PPP1R3D    | 0                   | 0.599273057701045 | 1 | 2.00E-04 | NA | NA | 0.0023 | 0 |
| NR_026973    | HLA-F-AS1  | 0                   | 0.599273057701045 | 1 | 2.00E-04 | NA | NA | 0.0023 | 0 |
| NR_026972    | HLA-F-AS1  | 0                   | 0.599273057701045 | 1 | 2.00E-04 | NA | NA | 0.0023 | 0 |
| NM_001171906 | NUDT16     | 0                   | 0.607451158564289 | 1 | 2.00E-04 | NA | NA | 0.0023 | 0 |
| NM_152395    | NUDT16     | 0                   | 0.607451158564289 | 1 | 2.00E-04 | NA | NA | 0.0023 | 0 |
| NR_033268    | NUDT16     | 0                   | 0.607451158564289 | 1 | 2.00E-04 | NA | NA | 0.0023 | 0 |
| NM_016076    | DES12      | 0                   | 0.607905497501136 | 1 | 2.00E-04 | NA | NA | 0.0023 | 0 |
| NM_194448    | CLEC4A     | 0                   | 0.608359836437983 | 1 | 2.00E-04 | NA | NA | 0.0023 | 0 |
| NM_194447    | CLEC4A     | 0                   | 0.608359836437983 | 1 | 2.00E-04 | NA | NA | 0.0023 | 0 |
| NM_194450    | CLEC4A     | 0                   | 0.608359836437983 | 1 | 2.00E-04 | NA | NA | 0.0023 | 0 |
| NM_016184    | CLEC4A     | 0                   | 0.608359836437983 | 1 | 2.00E-04 | NA | NA | 0.0023 | 0 |
| NM_000510    | FSHB       | 0                   | 0.614720581553839 | 1 | 2.00E-04 | NA | NA | 0.0023 | 0 |
| NM_001018080 | FSHB       | 0                   | 0.614720581553839 | 1 | 2.00E-04 | NA | NA | 0.0023 | 0 |
| NM_017655    | GIPC2      | 0                   | 0.615174920490686 | 1 | 2.00E-04 | NA | NA | 0.0023 | 0 |
| NM_003884    | KAT2B      | 0                   | 0.625624716038164 | 1 | 2.00E-04 | NA | NA | 0.0023 | 0 |
| NM_001197294 | DPYSL3     | 0                   | 0.626533393911858 | 1 | 2.00E-04 | NA | NA | 0.0023 | 0 |
| NM_001258371 | ACTN3      | 0                   | 0.627896410722399 | 1 | 2.00E-04 | NA | NA | 0.0023 | 0 |
| NR_003551    | DPY19L2P4  | 0                   | 0.62925942753294  | 1 | 2.00E-04 | NA | NA | 0.0023 | 0 |
| NM_001184898 | PHF8       | 0                   | 0.629713766469786 | 1 | 2.00E-04 | NA | NA | 0.0023 | 0 |
| NM_001171905 | NUDT16     | 0                   | 0.63062244434348  | 1 | 2.00E-04 | NA | NA | 0.0023 | 0 |
| NM_006041    | HS3ST3B1   | 0                   | 0.633348477964562 | 1 | 2.00E-04 | NA | NA | 0.0023 | 0 |
| NM_001198630 | RUNX1T1    | 0                   | 0.640163562017265 | 1 | 2.00E-04 | NA | NA | 0.0023 | 0 |
| NM_175635    | RUNX1T1    | 0                   | 0.640163562017265 | 1 | 2.00E-04 | NA | NA | 0.0023 | 0 |
| NM_001198629 | RUNX1T1    | 0                   | 0.640163562017265 | 1 | 2.00E-04 | NA | NA | 0.0023 | 0 |
| NM_001198632 | RUNX1T1    | 0                   | 0.640163562017265 | 1 | 2.00E-04 | NA | NA | 0.0023 | 0 |
| NM_015965    | NDUFA13    | 0                   | 0.640617900954112 | 1 | 2.00E-04 | NA | NA | 0.0023 | 0 |
| NM_002922    | RGS1       | 0                   | 0.641526578827806 | 1 | 2.00E-04 | NA | NA | 0.0023 | 0 |



|              |                     |                   |                   |   |          |    |    |        |   |
|--------------|---------------------|-------------------|-------------------|---|----------|----|----|--------|---|
| NM_030790    | <i>ITFG1</i>        | 0                 | 0.642435256701499 | 1 | 2.00E-04 | NA | NA | 0.0023 | 0 |
| NM_001145353 | <i>ELF1</i>         | 0                 | 0.642889595638346 | 1 | 2.00E-04 | NA | NA | 0.0023 | 0 |
| NM_018122    | <i>DARS2</i>        | 0.028169014084507 | 0.6715129486597   | 1 | 2.00E-04 | NA | NA | 0.0023 | 0 |
| NM_001039842 | <i>OXL1</i>         | 0                 | 0.650159018627896 | 1 | 2.00E-04 | NA | NA | 0.0023 | 0 |
| NM_018078    | <i>LARP1B</i>       | 0                 | 0.651522035438437 | 1 | 2.00E-04 | NA | NA | 0.0023 | 0 |
| NM_032239    | <i>LARP1B</i>       | 0                 | 0.651522035438437 | 1 | 2.00E-04 | NA | NA | 0.0023 | 0 |
| NM_178043    | <i>LARP1B</i>       | 0                 | 0.651522035438437 | 1 | 2.00E-04 | NA | NA | 0.0023 | 0 |
| NM_001278604 | <i>LARP1B</i>       | 0                 | 0.651522035438437 | 1 | 2.00E-04 | NA | NA | 0.0023 | 0 |
| NM_177422    | <i>AGO3</i>         | 0                 | 0.663789186733303 | 1 | 2.00E-04 | NA | NA | 0.0023 | 0 |
| NM_024852    | <i>AGO3</i>         | 0                 | 0.663789186733303 | 1 | 2.00E-04 | NA | NA | 0.0023 | 0 |
| NM_014753    | <i>BMS1</i>         | 0                 | 0.669695592912313 | 1 | 2.00E-04 | NA | NA | 0.0023 | 0 |
| NM_017924    | <i>C14orf119</i>    | 0                 | 0.6715129486597   | 1 | 2.00E-04 | NA | NA | 0.0023 | 0 |
| NM_178311    | <i>GGTLC1</i>       | 0                 | 0.67741935483871  | 1 | 2.00E-04 | NA | NA | 0.0023 | 0 |
| NM_004349    | <i>RUNX1T1</i>      | 0                 | 0.67741935483871  | 1 | 2.00E-04 | NA | NA | 0.0023 | 0 |
| NM_052903    | <i>TUBGCP5</i>      | 0                 | 0.67878237164925  | 1 | 2.00E-04 | NA | NA | 0.0023 | 0 |
| NM_001102610 | <i>TUBGCP5</i>      | 0                 | 0.67878237164925  | 1 | 2.00E-04 | NA | NA | 0.0023 | 0 |
| NM_001273    | <i>CHD4</i>         | 0                 | 0.682871422080872 | 1 | 2.00E-04 | NA | NA | 0.0023 | 0 |
| NM_000882    | <i>IL12A</i>        | 0                 | 0.688323489323035 | 1 | 2.00E-04 | NA | NA | 0.0023 | 0 |
| NM_001163999 | <i>MECOM</i>        | 0                 | 0.692866878691504 | 1 | 2.00E-04 | NA | NA | 0.0023 | 0 |
| NM_001105078 | <i>MECOM</i>        | 0                 | 0.692866878691504 | 1 | 2.00E-04 | NA | NA | 0.0023 | 0 |
| NM_005241    | <i>MECOM</i>        | 0                 | 0.692866878691504 | 1 | 2.00E-04 | NA | NA | 0.0023 | 0 |
| NM_001105077 | <i>MECOM</i>        | 0                 | 0.692866878691504 | 1 | 2.00E-04 | NA | NA | 0.0023 | 0 |
| NM_002090    | <i>CXCL3</i>        | 0                 | 0.693321217628351 | 1 | 2.00E-04 | NA | NA | 0.0023 | 0 |
| NR_026825    | <i>RPSAP52</i>      | 0                 | 0.702862335302135 | 1 | 2.00E-04 | NA | NA | 0.0023 | 0 |
| NM_006575    | <i>MAP4K5</i>       | 0                 | 0.70513402998637  | 1 | 2.00E-04 | NA | NA | 0.0023 | 0 |
| NM_198794    | <i>MAP4K5</i>       | 0                 | 0.70513402998637  | 1 | 2.00E-04 | NA | NA | 0.0023 | 0 |
| NM_001136215 | <i>ARTN</i>         | 0                 | 0.709677419354839 | 1 | 2.00E-04 | NA | NA | 0.0023 | 0 |
| NM_057091    | <i>ARTN</i>         | 0                 | 0.709677419354839 | 1 | 2.00E-04 | NA | NA | 0.0023 | 0 |
| NM_057090    | <i>ARTN</i>         | 0                 | 0.709677419354839 | 1 | 2.00E-04 | NA | NA | 0.0023 | 0 |
| NM_001040666 | <i>STEAP2</i>       | 0                 | 0.722853248523398 | 1 | 2.00E-04 | NA | NA | 0.0023 | 0 |
| NM_003341    | <i>UBE2E1</i>       | 0                 | 0.724670604270786 | 1 | 2.00E-04 | NA | NA | 0.0023 | 0 |
| NM_182666    | <i>UBE2E1</i>       | 0                 | 0.724670604270786 | 1 | 2.00E-04 | NA | NA | 0.0023 | 0 |
| NR_024365    | <i>PP12613</i>      | 0                 | 0.746933212176284 | 1 | 2.00E-04 | NA | NA | 0.0023 | 0 |
| NM_001282879 | <i>GGTLC2</i>       | 0                 | 0.777828259881872 | 1 | 2.00E-04 | NA | NA | 0.0023 | 0 |
| NM_014830    | <i>ZBTB39</i>       | 0                 | 0.777828259881872 | 1 | 2.00E-04 | NA | NA | 0.0023 | 0 |
| NM_001029865 | <i>DBX1</i>         | 0                 | 0.83507496592458  | 1 | 2.00E-04 | NA | NA | 0.0023 | 0 |
| NR_027439    | <i>LOC100272216</i> | 0                 | 0.851431167651068 | 1 | 2.00E-04 | NA | NA | 0.0023 | 0 |
| NM_001242871 | <i>SLAIN1</i>       | 0                 | 0.908677873693776 | 1 | 2.00E-04 | NA | NA | 0.0023 | 0 |
| NM_001242870 | <i>SLAIN1</i>       | 0                 | 0.908677873693776 | 1 | 2.00E-04 | NA | NA | 0.0023 | 0 |
| NM_001242869 | <i>SLAIN1</i>       | 0                 | 0.908677873693776 | 1 | 2.00E-04 | NA | NA | 0.0023 | 0 |
| NM_144595    | <i>SLAIN1</i>       | 0                 | 0.908677873693776 | 1 | 2.00E-04 | NA | NA | 0.0023 | 0 |
| NM_004982    | <i>KCNJ8</i>        | 0                 | 0.922762380736029 | 1 | 2.00E-04 | NA | NA | 0.0023 | 0 |
| NM_001244871 | <i>DAB2</i>         | 0                 | 0.966833257610177 | 1 | 2.00E-04 | NA | NA | 0.0023 | 0 |
| NM_001343    | <i>DAB2</i>         | 0                 | 0.966833257610177 | 1 | 2.00E-04 | NA | NA | 0.0023 | 0 |

Table S4: Methylation data showing differential methylated transcripts between lean/overweight and obese subjects in OVAT samples expressed by a ratio of hyper- and hypo-methylation per promoter. *fdr/FDR*= false discovery rate.

Supplementary Table 5

**Overlap methylation and mRNA expression in non-obese SAT vs. OVAT**

| Transcript   | GeneName       | non-obese_in_sc   | non-obese_in_vis  | p_value_in_sc | p_value_in_vis | logFC                               |
|--------------|----------------|-------------------|-------------------|---------------|----------------|-------------------------------------|
| NM_198392    | <i>TCF21</i>   | 0.81462971376647  | 0                 | 0.0002        | 1              | 0.399399187469191,0.387406156952021 |
| NM_021101    | <i>CLDN1</i>   | 0.485233984552476 | 0                 | 0.0002        | 1              | 0.543447048046078                   |
| NM_003206    | <i>TCF21</i>   | 0.814175374829623 | 0                 | 0.0002        | 1              | 0.399399187469191,0.387406156952021 |
| NM_013372    | <i>GREM1</i>   | 0.489777373920945 | 0                 | 0.0002        | 1              | 0.338045102496982,0.581496731952452 |
| NM_001191322 | <i>GREM1</i>   | 0.489777373920945 | 0                 | 0.0002        | 1              | 0.338045102496982,0.581496731952452 |
| NM_001191323 | <i>GREM1</i>   | 0.489777373920945 | 0                 | 0.0002        | 1              | 0.338045102496982,0.581496731952452 |
| NM_007351    | <i>MMRN1</i>   | 0.339391185824625 | 0                 | 0.0002        | 1              | 0.47869355530316                    |
| NM_001145672 | <i>SORBS2</i>  | 0.56792367105861  | 0                 | 0.0002        | 1              | 0.142072560452977,0.116207386900386 |
| NM_001015001 | <i>CKMT1A</i>  | 0.609722853248523 | 0.044525215810995 | 0.0002        | 1              | 0.147441164340478                   |
| NM_001001991 | <i>PAMR1</i>   | 0.424352567014993 | 0                 | 0.0002        | 1              | 0.300925263026701                   |
| NM_001873    | <i>CPE</i>     | 0.537937301226715 | 0                 | 0.0002        | 1              | 0.105953252176067                   |
| NM_015430    | <i>PAMR1</i>   | 0.424352567014993 | 0                 | 0.0002        | 1              | 0.300925263026701                   |
| NM_001166688 | <i>PFKM</i>    | 0.427987278509768 | 0                 | 0.0002        | 1              | 0.175115436220457                   |
| NM_001282676 | <i>PAMR1</i>   | 0.424352567014993 | 0                 | 0.0002        | 1              | 0.300925263026701                   |
| NM_001166687 | <i>PFKM</i>    | 0.427987278509768 | 0                 | 0.0002        | 1              | 0.175115436220457                   |
| NM_001137548 | <i>FAM25C</i>  | 0.334393457519309 | 0                 | 0.0002        | 1              | 0.305212690253206                   |
| NM_007257    | <i>PNMA2</i>   | 0.402089959109496 | 0                 | 0.0002        | 1              | 0.190027247301806                   |
| NM_001145671 | <i>SORBS2</i>  | 0.472512494320763 | 0                 | 0.0002        | 1              | 0.142072560452977,0.116207386900386 |
| NM_001127454 | <i>DFNA5</i>   | 0.383007723761926 | 0                 | 0.0002        | 1              | 0.173304731519945                   |
| NM_004403    | <i>DFNA5</i>   | 0.383007723761926 | 0                 | 0.0002        | 1              | 0.173304731519945                   |
| NM_001127453 | <i>DFNA5</i>   | 0.322126306224443 | 0                 | 0.0002        | 1              | 0.173304731519945                   |
| NM_000228    | <i>LAMB3</i>   | 0.349386642435257 | 0                 | 0.0002        | 1              | -0.219924203116401                  |
| NM_001172517 | <i>SATB2</i>   | 0.671058609722853 | 0                 | 0.0002        | 1              | -0.20287792024612                   |
| NM_021240    | <i>DMRT3</i>   | 0.557019536574284 | 0                 | 0.0002        | 1              | -0.348831219450151                  |
| NM_152722    | <i>HEPACAM</i> | 0.343934575193094 | 0                 | 0.0002        | 1              | -0.0364559504840982                 |
| NM_006557    | <i>DMRT2</i>   | 0.480690595184007 | 0                 | 0.0002        | 1              | -0.527536027478703                  |
| NM_001130865 | <i>DMRT2</i>   | 0.477055883689232 | 0                 | 0.0002        | 1              | -0.527536027478703                  |
| NM_001142614 | <i>EHBP1</i>   | 0.328941390277147 | 0                 | 0.0002        | 1              | -0.0598073618524202                 |
| NM_001177704 | <i>FREM1</i>   | 0.334393457519309 | 0                 | 0.0002        | 1              | -0.0888762145650124                 |
| NM_001127641 | <i>LAMB3</i>   | 0.35029532030895  | 0                 | 0.0002        | 1              | -0.219924203116401                  |
| NM_002395    | <i>ME1</i>     | 0.328032712403453 | 0                 | 0.0002        | 1              | -0.142560548254324                  |

|              |                |                   |                   |        |        |                                         |
|--------------|----------------|-------------------|-------------------|--------|--------|-----------------------------------------|
| NM_152380    | <i>TBX15</i>   | 0.307133121308496 | 0                 | 0.0002 | 1      | -0.577202729425433                      |
| NM_138711    | <i>PPARG</i>   | 0                 | 0.331667423898228 | 1      | 0.0002 | -0.0345807783858594                     |
| NM_001127443 | <i>CD36</i>    | 0                 | 0.304407087687415 | 1      | 0.0002 | -0.0690544579744574,-0.0728837741390822 |
| NM_001146    | <i>ANGPT1</i>  | 0                 | 0.428441617446615 | 1      | 0.0002 | -0.0546720484248784,-0.0435366063940616 |
| NM_138712    | <i>PPARG</i>   | 0                 | 0.462062698773285 | 1      | 0.0002 | -0.0345807783858594                     |
| NM_012156    | <i>EPB41L1</i> | 0                 | 0.323489323034984 | 1      | 0.0002 | -0.0674334120758171                     |
| NM_001199859 | <i>ANGPT1</i>  | 0                 | 0.428441617446615 | 1      | 0.0002 | -0.0546720484248784,-0.0435366063940616 |
| NM_005037    | <i>PPARG</i>   | 0                 | 0.462062698773285 | 1      | 0.0002 | -0.0345807783858594                     |
| NM_003881    | <i>WISP2</i>   | 0                 | 0.313493866424353 | 1      | 0.0002 | -0.152412807086256                      |
| NM_001242776 | <i>TMEM139</i> | 0                 | 0.469332121762835 | 1      | 0.0002 | -0.0632286907936523                     |
| NM_001242777 | <i>TMEM139</i> | 0                 | 0.469332121762835 | 1      | 0.0002 | -0.0632286907936523                     |
| NM_178140    | <i>PDZD2</i>   | 0                 | 0.358473421172194 | 1      | 0.0002 | -0.106146557682919                      |
| NM_001242773 | <i>TMEM139</i> | 0                 | 0.469332121762835 | 1      | 0.0002 | -0.0632286907936523                     |
| NM_001243779 | <i>FAM213A</i> | 0                 | 0.369831894593367 | 1      | 0.0002 | -0.0795012870943537                     |
| NM_001242774 | <i>TMEM139</i> | 0                 | 0.469332121762835 | 1      | 0.0002 | -0.0632286907936523                     |
| NM_001256585 | <i>MGLL</i>    | 0                 | 0.367105860972285 | 1      | 0.0002 | -0.11471584819879,-0.163045084822784    |
| NM_001242775 | <i>TMEM139</i> | 0                 | 0.469332121762835 | 1      | 0.0002 | -0.0632286907936523                     |
| NM_007283    | <i>MGLL</i>    | 0                 | 0.367105860972285 | 1      | 0.0002 | -0.11471584819879,-0.163045084822784    |
| NM_001282877 | <i>TMEM139</i> | 0                 | 0.469332121762835 | 1      | 0.0002 | -0.0632286907936523                     |
| NM_080645    | <i>COL12A1</i> | 0                 | 0.43071331213085  | 1      | 0.0002 | -0.0665147046574086                     |
| NM_001003794 | <i>MGLL</i>    | 0                 | 0.367105860972285 | 1      | 0.0002 | -0.11471584819879,-0.163045084822784    |
| NM_153345    | <i>TMEM139</i> | 0                 | 0.469332121762835 | 1      | 0.0002 | -0.0632286907936523                     |
| NM_004370    | <i>COL12A1</i> | 0                 | 0.43071331213085  | 1      | 0.0002 | -0.0665147046574086                     |
| NR_104250    | <i>TMEM139</i> | 0                 | 0.469332121762835 | 1      | 0.0002 | -0.0632286907936523                     |
| NR_104251    | <i>TMEM139</i> | 0                 | 0.469332121762835 | 1      | 0.0002 | -0.0632286907936523                     |
| NR_104252    | <i>TMEM139</i> | 0                 | 0.469332121762835 | 1      | 0.0002 | -0.0632286907936523                     |
| NM_001040002 | <i>MEOX1</i>   | 0                 | 0.406179009541118 | 1      | 0.0002 | -0.186487660210808,-0.201075440017571   |
| NM_001278711 | <i>NRN1</i>    | 0                 | 0.409813721035893 | 1      | 0.0002 | -0.183987170667408                      |
| NM_001277732 | <i>AOC3</i>    | 0                 | 0.442071785552022 | 1      | 0.0002 | -0.0965563273916721                     |
| NM_001713    | <i>BHMT</i>    | 0                 | 0.462517037710132 | 1      | 0.0002 | -0.085376200785608                      |
| NR_104253    | <i>TMEM139</i> | 0                 | 0.469332121762835 | 1      | 0.0002 | -0.0632286907936523                     |
| NR_104254    | <i>TMEM139</i> | 0                 | 0.469332121762835 | 1      | 0.0002 | -0.0632286907936523                     |
| NM_001282876 | <i>TMEM139</i> | 0                 | 0.469332121762835 | 1      | 0.0002 | -0.0632286907936523                     |
| NM_004098    | <i>EMX2</i>    | 0                 | 0.412994093593821 | 1      | 0.0002 | -0.259826469633324                      |

|              |                |   |                   |   |        |                                       |
|--------------|----------------|---|-------------------|---|--------|---------------------------------------|
| NR_040003    | <i>TMEM139</i> | 0 | 0.469332121762835 | 1 | 0.0002 | -0.0632286907936523                   |
| NM_001165924 | <i>EMX2</i>    | 0 | 0.412994093593821 | 1 | 0.0002 | -0.259826469633324                    |
| NM_015714    | <i>GOS2</i>    | 0 | 0.475238527941845 | 1 | 0.0002 | -0.120588120162767                    |
| NM_004527    | <i>MEOX1</i>   | 0 | 0.482507950931395 | 1 | 0.0002 | -0.186487660210808,-0.201075440017571 |
| NM_013999    | <i>MEOX1</i>   | 0 | 0.482507950931395 | 1 | 0.0002 | -0.186487660210808,-0.201075440017571 |
| NM_004503    | <i>HOXC6</i>   | 0 | 0.722398909586552 | 1 | 0.0002 | -0.416378320866966                    |
| NM_001189    | <i>NKX3-2</i>  | 0 | 0.495229441163108 | 1 | 0.0002 | 0.539757441787238                     |
| NM_001145670 | <i>SORBS2</i>  | 0 | 0.318945933666515 | 1 | 0.0002 | 0.142072560452977,0.116207386900386   |
| NM_005460    | <i>SNCAIP</i>  | 0 | 0.318037255792821 | 1 | 0.0002 | 0.112030065061109                     |
| NM_003603    | <i>SORBS2</i>  | 0 | 0.318945933666515 | 1 | 0.0002 | 0.142072560452977,0.116207386900386   |
| NM_001242935 | <i>SNCAIP</i>  | 0 | 0.318037255792821 | 1 | 0.0002 | 0.112030065061109                     |
| NM_001161662 | <i>WWC1</i>    | 0 | 0.332121762835075 | 1 | 0.0002 | 0.0959461885915092                    |
| NM_006690    | <i>MMP24</i>   | 0 | 0.337573830077238 | 1 | 0.0002 | 0.0962525507466354                    |
| NM_001161661 | <i>WWC1</i>    | 0 | 0.332121762835075 | 1 | 0.0002 | 0.0959461885915092                    |
| NM_015238    | <i>WWC1</i>    | 0 | 0.332121762835075 | 1 | 0.0002 | 0.0959461885915092                    |
| NM_201551    | <i>NELL1</i>   | 0 | 0.388914129940936 | 1 | 0.0002 | 0.0620519363844423                    |
| NM_006157    | <i>NELL1</i>   | 0 | 0.388914129940936 | 1 | 0.0002 | 0.0620519363844423                    |
| NM_004415    | <i>DSP</i>     | 0 | 0.587914584279873 | 1 | 0.0002 | 0.0952746325279408                    |
| NM_001008844 | <i>DSP</i>     | 0 | 0.587914584279873 | 1 | 0.0002 | 0.0952746325279408                    |

Table S5: Methylation and mRNA Expression data showing differential methylated transcripts between SAT and OVAT in lean/overweight subjects expressed by a ratio of hyper- and hypo-methylation per promoter; log FC= logarithmic fold change, represents changes in mRNA expression consistently standardized in relation to

Supplementary Table 6

**Overlap methylation and mRNA expression in obese SAT vs. OVAT**

| Transcript   | GeneName        | obese_in_sc       | obese_in_vis      | p_value_in_sc | p_value_in_vis | logFC                                   |
|--------------|-----------------|-------------------|-------------------|---------------|----------------|-----------------------------------------|
| NM_001015001 | <i>CKMT1A</i>   | 0.305315765561109 | 0                 | 2.00E-04      | 1              | 0.356470664914848                       |
| NM_001127453 | <i>DFNA5</i>    | 0.362562471603816 | 0                 | 2.00E-04      | 1              | 0.270306719557095                       |
| NM_001127454 | <i>DFNA5</i>    | 0.362562471603816 | 0                 | 2.00E-04      | 1              | 0.270306719557095                       |
| NM_001137548 | <i>FAM25C</i>   | 0.549295774647887 | 0                 | 2.00E-04      | 1              | 0.509426505820456                       |
| NM_001145671 | <i>SORBS2</i>   | 0.472512494320763 | 0.080872330758746 | 2.00E-04      | 1              | 0.192028912055425,0.189811059372892     |
| NM_001145672 | <i>SORBS2</i>   | 0.518400726942299 | 0                 | 2.00E-04      | 1              | 0.192028912055425,0.189811059372892     |
| NM_002581    | <i>PAPPA</i>    | 0.310313493866424 | 0                 | 2.00E-04      | 1              | 0.203579459104748                       |
| NM_003206    | <i>TCF21</i>    | 0.456610631531122 | 0                 | 2.00E-04      | 1              | 0.52078823287901,0.56641502685977       |
| NM_004403    | <i>DFNA5</i>    | 0.362562471603816 | 0                 | 2.00E-04      | 1              | 0.270306719557095                       |
| NM_020990    | <i>CKMT1B</i>   | 0.532030895047706 | 0                 | 2.00E-04      | 1              | 0.467589883872207                       |
| NM_021146    | <i>ANGPTL7</i>  | 0.337119491140391 | 0                 | 2.00E-04      | 1              | 0.278472131640929                       |
| NM_021973    | <i>HAND2</i>    | 0.334847796456156 | 0                 | 2.00E-04      | 1              | 0.226117230125589                       |
| NM_198392    | <i>TCF21</i>    | 0.457064970467969 | 0                 | 2.00E-04      | 1              | 0.52078823287901,0.56641502685977       |
| NM_198474    | <i>OLFML1</i>   | 0.352112676056338 | 0                 | 2.00E-04      | 1              | 0.141960274959819                       |
| NM_000231    | <i>SGCG</i>     | 0.304407087687415 | 0                 | 2.00E-04      | 1              | -0.144823746219718                      |
| NM_001004298 | <i>C10orf90</i> | 0.32121762835075  | 0                 | 2.00E-04      | 1              | -0.175453023222279                      |
| NM_001130865 | <i>DMRT2</i>    | 0.510222626079055 | 0                 | 2.00E-04      | 1              | -0.472004853621794                      |
| NM_001172517 | <i>SATB2</i>    | 0.63652885052249  | 0                 | 2.00E-04      | 1              | -0.209442444647933                      |
| NM_001206741 | <i>HSD11B1</i>  | 0.312585188550659 | 0                 | 2.00E-04      | 1              | -0.151647204833603,-0.159213989428251   |
| NM_006557    | <i>DMRT2</i>    | 0.51385733757383  | 0                 | 2.00E-04      | 1              | -0.472004853621794                      |
| NM_021240    | <i>DMRT3</i>    | 0.557019536574284 | 0                 | 2.00E-04      | 1              | -0.409512249528396                      |
| NM_181755    | <i>HSD11B1</i>  | 0.312585188550659 | 0                 | 2.00E-04      | 1              | -0.151647204833603,-0.159213989428251   |
| NM_181789    | <i>GLDN</i>     | 0.369831894593367 | 0                 | 2.00E-04      | 1              | -0.258232603447065                      |
| NM_181872    | <i>DMRT2</i>    | 0.389368468877783 | 0                 | 2.00E-04      | 1              | -0.472004853621794                      |
| NM_001278741 | <i>TSPAN6</i>   | 0.330304407087687 | 0                 | 2.00E-04      | 1              | -0.112743550689011,-0.119070210095121   |
| NM_001278742 | <i>TSPAN6</i>   | 0.330304407087687 | 0                 | 2.00E-04      | 1              | -0.112743550689011,-0.119070210095121   |
| NM_001278743 | <i>TSPAN6</i>   | 0.330304407087687 | 0                 | 2.00E-04      | 1              | -0.112743550689011,-0.119070210095121   |
| NM_003270    | <i>TSPAN6</i>   | 0.330304407087687 | 0                 | 2.00E-04      | 1              | -0.112743550689011,-0.119070210095121   |
| NM_000700    | <i>ANXA1</i>    | 0                 | 0.392548841435711 | 1             | 2.00E-04       | -0.13768844982978                       |
| NM_001018064 | <i>NTRK2</i>    | 0                 | 0.332121762835075 | 1             | 2.00E-04       | -0.297090705842499,-0.193084582925197,- |
| NM_001025108 | <i>AFF3</i>     | 0                 | 0.58246251703771  | 1             | 2.00E-04       | -0.165903454929362                      |
| NM_001165924 | <i>EMX2</i>     | 0                 | 0.457519309404816 | 1             | 2.00E-04       | -0.362159057549322                      |
| NM_001242773 | <i>TMEM139</i>  | 0                 | 0.31531122217174  | 1             | 2.00E-04       | -0.207757413353633                      |

|              |          |   |                   |   |          |                                         |
|--------------|----------|---|-------------------|---|----------|-----------------------------------------|
| NM_001242774 | TMEM139  | 0 | 0.31531122217174  | 1 | 2.00E-04 | -0.207757413353633                      |
| NM_001242775 | TMEM139  | 0 | 0.31531122217174  | 1 | 2.00E-04 | -0.207757413353633                      |
| NM_001242776 | TMEM139  | 0 | 0.31531122217174  | 1 | 2.00E-04 | -0.207757413353633                      |
| NM_001242777 | TMEM139  | 0 | 0.31531122217174  | 1 | 2.00E-04 | -0.207757413353633                      |
| NM_001242946 | EPDR1    | 0 | 0.318037255792821 | 1 | 2.00E-04 | -0.177653491235136                      |
| NM_001277732 | AOC3     | 0 | 0.42480690595184  | 1 | 2.00E-04 | -0.117304888853199                      |
| NM_001278711 | NRN1     | 0 | 0.36210813266697  | 1 | 2.00E-04 | -0.240540337385374                      |
| NM_001282876 | TMEM139  | 0 | 0.31531122217174  | 1 | 2.00E-04 | -0.207757413353633                      |
| NM_001282877 | TMEM139  | 0 | 0.31531122217174  | 1 | 2.00E-04 | -0.207757413353633                      |
| NM_004098    | EMX2     | 0 | 0.457519309404816 | 1 | 2.00E-04 | -0.362159057549322                      |
| NM_004370    | COL12A1  | 0 | 0.444797819173103 | 1 | 2.00E-04 | -0.21040025616273                       |
| NM_004503    | HOXC6    | 0 | 0.66424352567015  | 1 | 2.00E-04 | -0.479071708395575                      |
| NM_005037    | PPARG    | 0 | 0.416628805088596 | 1 | 2.00E-04 | -0.132147105349685                      |
| NM_005218    | DEFB1    | 0 | 0.419809177646524 | 1 | 2.00E-04 | -0.289365298710702                      |
| NM_006180    | NTRK2    | 0 | 0.332121762835075 | 1 | 2.00E-04 | -0.297090705842499,-0.193084582925197,- |
| NM_015004    | EXOSC7   | 0 | 0.388005452067242 | 1 | 2.00E-04 | -0.240365412310418                      |
| NM_017549    | EPDR1    | 0 | 0.318037255792821 | 1 | 2.00E-04 | -0.177653491235136                      |
| NM_022658    | HOXC8    | 0 | 0.350749659245797 | 1 | 2.00E-04 | -0.796582636868966                      |
| NM_080645    | COL12A1  | 0 | 0.444797819173103 | 1 | 2.00E-04 | -0.21040025616273                       |
| NM_138712    | PPARG    | 0 | 0.416628805088596 | 1 | 2.00E-04 | -0.132147105349685                      |
| NM_153345    | TMEM139  | 0 | 0.31531122217174  | 1 | 2.00E-04 | -0.207757413353633                      |
| NR_023353    | EXOSC7   | 0 | 0.388005452067242 | 1 | 2.00E-04 | -0.240365412310418                      |
| NR_040003    | TMEM139  | 0 | 0.31531122217174  | 1 | 2.00E-04 | -0.207757413353633                      |
| NR_104250    | TMEM139  | 0 | 0.31531122217174  | 1 | 2.00E-04 | -0.207757413353633                      |
| NR_104251    | TMEM139  | 0 | 0.31531122217174  | 1 | 2.00E-04 | -0.207757413353633                      |
| NR_104252    | TMEM139  | 0 | 0.31531122217174  | 1 | 2.00E-04 | -0.207757413353633                      |
| NR_104253    | TMEM139  | 0 | 0.31531122217174  | 1 | 2.00E-04 | -0.207757413353633                      |
| NR_104254    | TMEM139  | 0 | 0.31531122217174  | 1 | 2.00E-04 | -0.207757413353633                      |
| NM_001144758 | PHLDB1   | 0 | 0.532030895047706 | 1 | 2.00E-04 | -0.100423067735793                      |
| NM_001144759 | PHLDB1   | 0 | 0.532030895047706 | 1 | 2.00E-04 | -0.100423067735793                      |
| NM_002959    | SORT1    | 0 | 0.434802362562472 | 1 | 2.00E-04 | -0.191238469929917                      |
| NM_015157    | PHLDB1   | 0 | 0.315765561108587 | 1 | 2.00E-04 | -0.100423067735793                      |
| NM_001276326 | SLC22A12 | 0 | 0.482053611994548 | 1 | 2.00E-04 | -0.104860467870669                      |
| NM_001276327 | SLC22A12 | 0 | 0.482053611994548 | 1 | 2.00E-04 | -0.104860467870669                      |
| NM_144585    | SLC22A12 | 0 | 0.482053611994548 | 1 | 2.00E-04 | -0.104860467870669                      |
| NM_153378    | SLC22A12 | 0 | 0.482053611994548 | 1 | 2.00E-04 | -0.104860467870669                      |

|              |               |   |                   |   |          |                                     |
|--------------|---------------|---|-------------------|---|----------|-------------------------------------|
| NM_001145670 | <i>SORBS2</i> | 0 | 0.388914129940936 | 1 | 2.00E-04 | 0.192028912055425,0.189811059372892 |
| NM_002048    | <i>GAS1</i>   | 0 | 0.315765561108587 | 1 | 2.00E-04 | 0.204310585183995,0.208821558819704 |
| NM_003603    | <i>SORBS2</i> | 0 | 0.388914129940936 | 1 | 2.00E-04 | 0.192028912055425,0.189811059372892 |
| NM_006157    | <i>NELL1</i>  | 0 | 0.438437074057247 | 1 | 2.00E-04 | 0.228722905177137                   |
| NM_006474    | <i>PDPN</i>   | 0 | 0.364379827351204 | 1 | 2.00E-04 | 0.614529523945373                   |
| NM_006690    | <i>MMP24</i>  | 0 | 0.337119491140391 | 1 | 2.00E-04 | 0.175819049280043                   |
| NM_014862    | <i>ARNT2</i>  | 0 | 0.327578373466606 | 1 | 2.00E-04 | 0.276745239563775                   |
| NM_018667    | <i>SMPD3</i>  | 0 | 0.398909586551567 | 1 | 2.00E-04 | 0.209899762923996                   |
| NM_020770    | <i>CGN</i>    | 0 | 0.304407087687415 | 1 | 2.00E-04 | 0.893354258102973                   |
| NM_020783    | <i>SYT4</i>   | 0 | 0.43071331213085  | 1 | 2.00E-04 | 0.706270118302064                   |
| NM_198389    | <i>PDPN</i>   | 0 | 0.364379827351204 | 1 | 2.00E-04 | 0.614529523945373                   |
| NM_201551    | <i>NELL1</i>  | 0 | 0.438437074057247 | 1 | 2.00E-04 | 0.228722905177137                   |

Table S6: Methylation and mRNA Expression data showing differential methylated transcripts between SAT and OVAT in obese subjects expressed by a ratio of hyper- and hypo-methylation per promoter; log FC= logarithmic fold change, represents changes in mRNA expression consistently standardized in relation to OVAT; fdr/FDR= false

Supplementary Table 7

**Overlap methylation and mRNA expression in SAT non-obese vs. obese**

| Transcript   | GeneName        | sc_in_obese       | sc_in_non-obese | p_value_in_obese | p_value_in_non-obese | logFC                                  |
|--------------|-----------------|-------------------|-----------------|------------------|----------------------|----------------------------------------|
| NM_000299    | <i>PKP1</i>     | 0.302589731940027 | 0               | 2.00E-04         | 1                    | 0.0471158867833306                     |
| NM_000396    | <i>CTSK</i>     | 0.545661063153112 | 0               | 2.00E-04         | 1                    | 0.0284968758386186                     |
| NM_001005337 | <i>PKP1</i>     | 0.302589731940027 | 0               | 2.00E-04         | 1                    | 0.0471158867833306                     |
| NM_001005340 | <i>GPNMB</i>    | 0.409813721035893 | 0               | 2.00E-04         | 1                    | 0.0585308702956504,0.0575598216486921  |
| NM_001112719 | <i>LIMCH1</i>   | 0.48614266242617  | 0               | 2.00E-04         | 1                    | 0.0661561077661532                     |
| NM_001112720 | <i>LIMCH1</i>   | 0.48614266242617  | 0               | 2.00E-04         | 1                    | 0.0661561077661532                     |
| NM_001145454 | <i>STMN1</i>    | 0.429350295320309 | 0               | 2.00E-04         | 1                    | 0.0647257616197863                     |
| NM_001145646 | <i>APH1B</i>    | 0.470240799636529 | 0               | 2.00E-04         | 1                    | 0.0375892026464195                     |
| NM_001177704 | <i>FREM1</i>    | 0.722853248523398 | 0               | 2.00E-04         | 1                    | 0.0972671117618944                     |
| NM_001252511 | <i>SOAT1</i>    | 0.317582916855975 | 0               | 2.00E-04         | 1                    | 0.0535117705377233                     |
| NM_001252512 | <i>SOAT1</i>    | 0.317582916855975 | 0               | 2.00E-04         | 1                    | 0.0535117705377233                     |
| NM_001267572 | <i>TBC1D2</i>   | 0.413448432530668 | 0               | 2.00E-04         | 1                    | 0.108052057141788                      |
| NM_001276    | <i>CHI3L1</i>   | 0.514311676510677 | 0               | 2.00E-04         | 1                    | 0.240842871383252                      |
| NM_001295    | <i>CCR1</i>     | 0.394820536119945 | 0               | 2.00E-04         | 1                    | 0.0785709671120176                     |
| NM_001503    | <i>GPLD1</i>    | 0.336665152203544 | 0               | 2.00E-04         | 1                    | 0.182213467304387                      |
| NM_002510    | <i>GPNMB</i>    | 0.409813721035893 | 0               | 2.00E-04         | 1                    | 0.0585308702956504,0.0575598216486921  |
| NM_003101    | <i>SOAT1</i>    | 0.317582916855975 | 0               | 2.00E-04         | 1                    | 0.0535117705377233                     |
| NM_005563    | <i>STMN1</i>    | 0.429350295320309 | 0               | 2.00E-04         | 1                    | 0.0647257616197863                     |
| NM_015035    | <i>ZHX3</i>     | 0.343934575193094 | 0               | 2.00E-04         | 1                    | 0.0431960293121811                     |
| NM_031301    | <i>APH1B</i>    | 0.470240799636529 | 0               | 2.00E-04         | 1                    | 0.0375892026464195                     |
| NM_032857    | <i>LACTB</i>    | 0.318037255792821 | 0               | 2.00E-04         | 1                    | 0.111708400140961                      |
| NM_138636    | <i>TLR8</i>     | 0.354384370740572 | 0               | 2.00E-04         | 1                    | 0.0771384244963924                     |
| NM_171846    | <i>LACTB</i>    | 0.318037255792821 | 0               | 2.00E-04         | 1                    | 0.111708400140961                      |
| NM_203399    | <i>STMN1</i>    | 0.459336665152204 | 0               | 2.00E-04         | 1                    | 0.0647257616197863                     |
| NR_002912    | <i>SNORA67</i>  | 0.581099500227169 | 0               | 2.00E-04         | 1                    | 0.0816312169064406,0.0633908570297677  |
| NR_045530    | <i>SOAT1</i>    | 0.317582916855975 | 0               | 2.00E-04         | 1                    | 0.0535117705377233                     |
| NM_000056    | <i>BCKDHB</i>   | 0.314402544298046 | 0               | 2.00E-04         | 1                    | -0.0854408392598371                    |
| NM_001144966 | <i>NEDD4L</i>   | 0.355747387551113 | 0               | 2.00E-04         | 1                    | -0.0361295269202375                    |
| NM_001170630 | <i>TJP2</i>     | 0.303952748750568 | 0               | 2.00E-04         | 1                    | -0.0493519673297458                    |
| NM_001243723 | <i>SETMAR</i>   | 0.535211267605634 | 0               | 2.00E-04         | 1                    | -0.0314989369525338                    |
| NM_001244676 | <i>THNSL2</i>   | 0.346660608814175 | 0               | 0.0018           | 0.9998               | -0.0496669810888228                    |
| NM_001244678 | <i>THNSL2</i>   | 0.346660608814175 | 0               | 4.00E-04         | 0.9996               | -0.0496669810888228                    |
| NM_001267536 | <i>GOLGA6L4</i> | 0.428895956383462 | 0               | 2.00E-04         | 1                    | -0.0400061299692653                    |
| NM_001276325 | <i>SETMAR</i>   | 0.535211267605634 | 0               | 2.00E-04         | 1                    | -0.0314989369525338                    |
| NM_004817    | <i>TJP2</i>     | 0.303952748750568 | 0               | 2.00E-04         | 1                    | -0.0493519673297458                    |
| NM_005863    | <i>NET1</i>     | 0.334393457519309 | 0               | 2.00E-04         | 1                    | -0.158299323884289,-0.0511764816359424 |
| NM_006515    | <i>SETMAR</i>   | 0.535211267605634 | 0               | 2.00E-04         | 1                    | -0.031498937                           |
| NM_014234    | <i>HSD17B8</i>  | 0.450249886415266 | 0               | 2.00E-04         | 1                    | -0.102928046271413                     |
| NM_015689    | <i>DENND2A</i>  | 0.303044070876874 | 0               | 2.00E-04         | 1                    | -0.0581011915704375                    |
| NM_024686    | <i>TTLL7</i>    | 0.320763289413903 | 0               | 2.00E-04         | 1                    | -0.0463752640348414                    |



|              |                 |                    |                   |          |          |                                                            |
|--------------|-----------------|--------------------|-------------------|----------|----------|------------------------------------------------------------|
| NM_152765    | <i>C8orf46</i>  | 0.330304407087687  | 0                 | 2.00E-04 | 1        | -0.0625264270582753                                        |
| NM_183050    | <i>BCKDHB</i>   | 0.314402544298046  | 0                 | 2.00E-04 | 1        | -0.0854408392598371                                        |
| NM_201629    | <i>TJP2</i>     | 0.303952748750568  | 0                 | 2.00E-04 | 1        | -0.0493519673297458                                        |
| NM_206852    | <i>RTN1</i>     | 0.339845524761472  | 0                 | 2.00E-04 | 1        | -0.119620714623941                                         |
| NR_024022    | <i>SETMAR</i>   | 0.394820536119945  | 0                 | 2.00E-04 | 1        | -0.0314989369525338                                        |
| NR_073040    | <i>NET1</i>     | 0.334393457519309  | 0                 | 2.00E-04 | 1        | -0.158299323884289,-0.0511764816359424                     |
| NR_075073    | <i>SETMAR</i>   | 0.535211267605634  | 0                 | 2.00E-04 | 1        | -0.0314989369525338                                        |
| NM_000176    | <i>NR3C1</i>    | 0                  | 0.397546569741027 | 1        | 2.00E-04 | -0.05734822446961                                          |
| NM_000667    | <i>ADH1A</i>    | 0                  | 0.537028623353021 | 1        | 2.00E-04 | -0.191942052168434                                         |
| NM_000668    | <i>ADH1B</i>    | 0                  | 0.452067242162653 | 1        | 2.00E-04 | -0.336245738833386                                         |
| NM_001018076 | <i>NR3C1</i>    | 0                  | 0.487051340299864 | 1        | 2.00E-04 | -0.05734822446961                                          |
| NM_001020825 | <i>NR3C1</i>    | 0                  | 0.397546569741027 | 1        | 2.00E-04 | -0.05734822446961                                          |
| NM_001024094 | <i>NR3C1</i>    | 0                  | 0.397546569741027 | 1        | 2.00E-04 | -0.05734822446961                                          |
| NM_001122752 | <i>SERPINI1</i> | 0                  | 0.520672421626533 | 1        | 2.00E-04 | -0.0832452200450833                                        |
| NM_001172509 | <i>SATB2</i>    | 0                  | 0.353021353930032 | 1        | 2.00E-04 | -0.000725328943377956                                      |
| NM_001198943 | <i>DTNA</i>     | 0.0654248069059518 | 0.393457519309405 | 0.9988   | 8.00E-04 | -0.108617354252376,-0.0475980232241939,-0.0738025338459136 |
| NM_001199758 | <i>MTHFS</i>    | 0                  | 0.479781917310313 | 1        | 2.00E-04 | -0.0474820686297819                                        |
| NM_001204258 | <i>NR3C1</i>    | 0                  | 0.397546569741027 | 1        | 2.00E-04 | -0.05734822446961                                          |
| NM_001204259 | <i>NR3C1</i>    | 0                  | 0.397546569741027 | 1        | 2.00E-04 | -0.05734822446961                                          |
| NM_001204260 | <i>NR3C1</i>    | 0                  | 0.397546569741027 | 1        | 2.00E-04 | -0.05734822446961                                          |
| NM_001204261 | <i>NR3C1</i>    | 0                  | 0.397546569741027 | 1        | 2.00E-04 | -0.05734822446961                                          |
| NM_001204262 | <i>NR3C1</i>    | 0                  | 0.397546569741027 | 1        | 2.00E-04 | -0.05734822446961                                          |
| NM_001204263 | <i>NR3C1</i>    | 0                  | 0.397546569741027 | 1        | 2.00E-04 | -0.05734822446961                                          |
| NM_001204264 | <i>NR3C1</i>    | 0                  | 0.397546569741027 | 1        | 2.00E-04 | -0.05734822446961                                          |
| NM_001204265 | <i>NR3C1</i>    | 0                  | 0.397546569741027 | 1        | 2.00E-04 | -0.05734822446961                                          |
| NM_001242875 | <i>ELP2</i>     | 0                  | 0.303498409813721 | 1        | 2.00E-04 | -0.0825971472945297                                        |
| NM_001242876 | <i>ELP2</i>     | 0                  | 0.303498409813721 | 1        | 2.00E-04 | -0.0825971472945297                                        |
| NM_001242877 | <i>ELP2</i>     | 0                  | 0.303498409813721 | 1        | 2.00E-04 | -0.0825971472945297                                        |
| NM_001242878 | <i>ELP2</i>     | 0                  | 0.303498409813721 | 1        | 2.00E-04 | -0.0825971472945297                                        |
| NM_001242879 | <i>ELP2</i>     | 0                  | 0.303498409813721 | 1        | 2.00E-04 | -0.0825971472945297                                        |
| NM_001244705 | <i>CSAD</i>     | 0                  | 0.467060427078601 | 1        | 2.00E-04 | -0.0746956024883345,-0.054988200383314                     |
| NM_001256421 | <i>AGPAT9</i>   | 0                  | 0.316674238982281 | 1        | 2.00E-04 | -0.416316496539217                                         |
| NM_001256422 | <i>AGPAT9</i>   | 0                  | 0.316674238982281 | 1        | 2.00E-04 | -0.416316496539217                                         |
| NM_001278243 | <i>ZFAND5</i>   | 0                  | 0.399818264425261 | 1        | 2.00E-04 | -0.0970307224807607                                        |
| NM_001278244 | <i>ZFAND5</i>   | 0                  | 0.399818264425261 | 1        | 2.00E-04 | -0.0970307224807607                                        |
| NM_001278245 | <i>ZFAND5</i>   | 0                  | 0.399818264425261 | 1        | 2.00E-04 | -0.0970307224807607                                        |
| NM_001280801 | <i>RNF130</i>   | 0                  | 0.406179009541118 | 1        | 2.00E-04 | -0.0325514014251405                                        |
| NM_002840    | <i>PTPRF</i>    | 0                  | 0.852339845524761 | 1        | 2.00E-04 | -0.0892502552574359                                        |
| NM_004753    | <i>DHRS3</i>    | 0                  | 0.380281690140845 | 1        | 2.00E-04 | -0.0587770673255625                                        |
| NM_004982    | <i>KCNJ8</i>    | 0                  | 0.364379827351204 | 1        | 2.00E-04 | -0.0148839549607858                                        |
| NM_005025    | <i>SERPINI1</i> | 0                  | 0.520672421626533 | 1        | 2.00E-04 | -0.0832452200450833                                        |
| NM_005386    | <i>NNAT</i>     | 0                  | 0.308950477055884 | 1        | 2.00E-04 | -0.00473659445072716                                       |
| NM_006441    | <i>MTHFS</i>    | 0                  | 0.410722398909587 | 1        | 2.00E-04 | -0.0474820686297819                                        |
| NM_015265    | <i>SATB2</i>    | 0                  | 0.329850068150841 | 1        | 2.00E-04 | -0.000725328943377956                                      |

|              |        |                     |                   |   |          |                                                        |
|--------------|--------|---------------------|-------------------|---|----------|--------------------------------------------------------|
| NM_015989    | CSAD   | 0                   | 0.537028623353021 | 1 | 2.00E-04 | -0.0746956024883345,-0.054988200383314                 |
| NM_016173    | HEMK1  | 0                   | 0.3284870513403   | 1 | 2.00E-04 | -0.0869834605673243                                    |
| NM_018255    | ELP2   | 0                   | 0.303498409813721 | 1 | 2.00E-04 | -0.0825971472945297                                    |
| NM_018434    | RNF130 | 0                   | 0.406179009541118 | 1 | 2.00E-04 | -0.0325514014251405                                    |
| NM_020247    | ADCK3  | 0                   | 0.412085415720127 | 1 | 2.00E-04 | -0.151157131469805                                     |
| NM_024944    | CHODL  | 0                   | 0.447523852794184 | 1 | 2.00E-04 | -0.208645553871256                                     |
| NM_032687    | CYHR1  | 0                   | 0.330304407087687 | 1 | 2.00E-04 | -0.0406304524762362                                    |
| NM_032717    | AGPAT9 | 0                   | 0.316674238982281 | 1 | 2.00E-04 | -0.416316496539217                                     |
| NM_130440    | PTPRF  | 0                   | 0.852339845524761 | 1 | 2.00E-04 | -0.0892502552574359                                    |
| NM_138496    | CYHR1  | 0                   | 0.414357110404362 | 1 | 2.00E-04 | -0.0406304524762362                                    |
| NM_152310    | ELOVL3 | 0                   | 0.472058155383916 | 1 | 2.00E-04 | -0.0687756378676641                                    |
| NM_152328    | ADSSL1 | 0                   | 0.329850068150841 | 1 | 2.00E-04 | -0.207827956652091                                     |
| NM_181689    | NNAT   | 0                   | 0.308950477055884 | 1 | 2.00E-04 | -0.00473659445072716                                   |
| NR_033798    | CAST   | 0                   | 0.306678782371649 | 1 | 2.00E-04 | -0.0850965230058063                                    |
| NR_037654    | MTHFS  | 0                   | 0.388459791004089 | 1 | 2.00E-04 | -0.0474820686297819                                    |
| NR_040110    | ELP2   | 0                   | 0.303498409813721 | 1 | 2.00E-04 | -0.0825971472945297                                    |
| NR_104285    | CAST   | 0                   | 0.306678782371649 | 1 | 2.00E-04 | -0.0850965230058063                                    |
| NM_000233    | LHCGR  | 0                   | 0.399363925488414 | 1 | 2.00E-04 | 0.23506383927474                                       |
| NM_000426    | LAMA2  | 0                   | 0.333030440708769 | 1 | 2.00E-04 | 0.0435780112209914                                     |
| NM_000582    | SPP1   | 0.00636074511585643 | 0.35620172648796  | 1 | 2.00E-04 | 0.248789484568281,0.267467030780254                    |
| NM_001007097 | NTRK2  | 0                   | 0.348023625624716 | 1 | 2.00E-04 | -0.0168461992174602,0.012356924925526,0.06876934410819 |
| NM_001018064 | NTRK2  | 0                   | 0.329395729213994 | 1 | 2.00E-04 | -0.0168461992174602,0.012356924925526,0.06876934410819 |
| NM_001018065 | NTRK2  | 0                   | 0.36210813266697  | 1 | 2.00E-04 | -0.0168461992174602,0.012356924925526,0.06876934410819 |
| NM_001018066 | NTRK2  | 0                   | 0.36210813266697  | 1 | 2.00E-04 | -0.0168461992174602,0.012356924925526,0.06876934410819 |
| NM_001040058 | SPP1   | 0.00636074511585643 | 0.35620172648796  | 1 | 2.00E-04 | 0.248789484568281,0.267467030780254                    |
| NM_001040060 | SPP1   | 0.00636074511585643 | 0.35620172648796  | 1 | 2.00E-04 | 0.248789484568281,0.267467030780254                    |
| NM_001079823 | LAMA2  | 0                   | 0.333030440708769 | 1 | 2.00E-04 | 0.0435780112209914                                     |
| NM_001127182 | CEP55  | 0                   | 0.402998636983189 | 1 | 2.00E-04 | 0.089295556521225                                      |
| NM_001135585 | SLC2A5 | 0                   | 0.496592457973648 | 1 | 2.00E-04 | 0.140850004752275                                      |
| NM_001172129 | HCK    | 0                   | 0.489777373920945 | 1 | 2.00E-04 | 0.106289400049177                                      |
| NM_001172130 | HCK    | 0                   | 0.489777373920945 | 1 | 2.00E-04 | 0.106289400049177                                      |
| NM_001172131 | HCK    | 0                   | 0.489777373920945 | 1 | 2.00E-04 | 0.106289400049177                                      |
| NM_001172132 | HCK    | 0                   | 0.489777373920945 | 1 | 2.00E-04 | 0.106289400049177                                      |
| NM_001172133 | HCK    | 0                   | 0.489777373920945 | 1 | 2.00E-04 | 0.106289400049177                                      |
| NM_001178093 | BCAT1  | 0                   | 0.312130849613812 | 1 | 2.00E-04 | 0.0653780960649391                                     |
| NM_001184808 | CD99L2 | 0                   | 0.460245343025897 | 1 | 2.00E-04 | 0.0114517543292161                                     |
| NM_001193493 | SLC1A4 | 0                   | 0.394366197183099 | 1 | 2.00E-04 | 0.0738163761966202                                     |
| NM_001199214 | STMN2  | 0.12267151294866    | 0.451612903225806 | 1 | 2.00E-04 | 0.245661926602997,0.196761013925069                    |
| NM_001200050 | NPL    | 0                   | 0.320308950477056 | 1 | 2.00E-04 | 0.188383484159452,0.147867013244954                    |
| NM_001200051 | NPL    | 0                   | 0.320308950477056 | 1 | 2.00E-04 | 0.188383484159452,0.147867013244954                    |
| NM_001200052 | NPL    | 0                   | 0.320308950477056 | 1 | 2.00E-04 | 0.188383484159452,0.147867013244954                    |
| NM_001200056 | NPL    | 0                   | 0.320308950477056 | 1 | 2.00E-04 | 0.188383484159452,0.147867013244954                    |
| NM_001242614 | CD99L2 | 0                   | 0.460245343025897 | 1 | 2.00E-04 | 0.0114517543292161                                     |
| NM_001242946 | EPDR1  | 0                   | 0.728305315765561 | 1 | 2.00E-04 | 0.16926733193021                                       |

|              |          |                     |                   |   |          |                                                        |
|--------------|----------|---------------------|-------------------|---|----------|--------------------------------------------------------|
| NM_001242948 | EPDR1    | 0                   | 0.519309404815993 | 1 | 2.00E-04 | 0.16926733193021                                       |
| NM_001251829 | SPP1     | 0.00636074511585643 | 0.35620172648796  | 1 | 2.00E-04 | 0.248789484568281,0.267467030780254                    |
| NM_001251830 | SPP1     | 0.00636074511585643 | 0.35620172648796  | 1 | 2.00E-04 | 0.248789484568281,0.267467030780254                    |
| NM_001256088 | C11orf45 | 0                   | 0.381644706951386 | 1 | 2.00E-04 | 0.130914404437146                                      |
| NM_001258017 | IL4I1    | 0                   | 0.360745115856429 | 1 | 2.00E-04 | 0.0972646828965877                                     |
| NM_001258018 | IL4I1    | 0                   | 0.360745115856429 | 1 | 2.00E-04 | 0.0972646828965877                                     |
| NM_001693    | ATP6V1B2 | 0                   | 0.616992276238074 | 1 | 2.00E-04 | 0.0275363280009073                                     |
| NM_001754    | RUNX1    | 0                   | 0.649250340754203 | 1 | 2.00E-04 | 0.0505172483272487                                     |
| NM_001769    | CD9      | 0                   | 0.427532939572921 | 1 | 2.00E-04 | 0.115804393974336                                      |
| NM_001987    | ETV6     | 0                   | 0.314856883234893 | 1 | 2.00E-04 | 0.084019148767184                                      |
| NM_002110    | HCK      | 0                   | 0.489777373920945 | 1 | 2.00E-04 | 0.106289400049177                                      |
| NM_002115    | HK3      | 0                   | 0.347569286687869 | 1 | 2.00E-04 | 0.164422719904675                                      |
| NM_002432    | MNDA     | 0                   | 0.358927760109041 | 1 | 2.00E-04 | 0.122464227343676                                      |
| NM_003039    | SLC2A5   | 0                   | 0.496592457973648 | 1 | 2.00E-04 | 0.140850004752275                                      |
| NM_003272    | GPR137B  | 0                   | 0.508405270331667 | 1 | 2.00E-04 | 0.0643997476247242                                     |
| NM_004763    | ITGB1BP1 | 0                   | 0.398000908677874 | 1 | 2.00E-04 | 0.111350512700191                                      |
| NM_006180    | NTRK2    | 0                   | 0.329395729213994 | 1 | 2.00E-04 | -0.0168461992174602,0.012356924925526,0.06876934410819 |
| NM_006633    | IQGAP2   | 0                   | 0.354384370740572 | 1 | 2.00E-04 | 0.0662498774496929                                     |
| NM_006762    | LAPTM5   | 0                   | 0.400726942298955 | 1 | 2.00E-04 | 0.188459887945938                                      |
| NM_007029    | STMN2    | 0.12267151294866    | 0.451612903225806 | 1 | 2.00E-04 | 0.245661926602997,0.196761013925069                    |
| NM_015004    | EXOSC7   | 0                   | 0.441163107678328 | 1 | 2.00E-04 | 0.174983789417301                                      |
| NM_016613    | FAM198B  | 0                   | 0.36210813266697  | 1 | 2.00E-04 | 0.160285941454331,0.2351933209872                      |
| NM_017549    | EPDR1    | 0                   | 0.728305315765561 | 1 | 2.00E-04 | 0.16926733193021                                       |
| NM_017633    | FAM46A   | 0                   | 0.448432530667878 | 1 | 2.00E-04 | 0.10444232744202                                       |
| NM_018131    | CEP55    | 0                   | 0.393911858246252 | 1 | 2.00E-04 | 0.089295556521225                                      |
| NM_019111    | HLA-DRA  | 0                   | 0.341208541572013 | 1 | 2.00E-04 | 0.093334761544444,0.0822225460080039                   |
| NM_020125    | SLAMF8   | 0                   | 0.309859154929577 | 1 | 2.00E-04 | 0.153524770152062                                      |
| NM_022334    | ITGB1BP1 | 0                   | 0.398000908677874 | 1 | 2.00E-04 | 0.111350512700191                                      |
| NM_030769    | NPL      | 0                   | 0.320308950477056 | 1 | 2.00E-04 | 0.188383484159452,0.147867013244954                    |
| NM_031462    | CD99L2   | 0                   | 0.460245343025897 | 1 | 2.00E-04 | 0.0114517543292161                                     |
| NM_032955    | AIF1     | 0                   | 0.367105860972285 | 1 | 2.00E-04 | 0.0895934849333608,0.0683583822327056                  |
| NM_134445    | CD99L2   | 0                   | 0.460245343025897 | 1 | 2.00E-04 | 0.0114517543292161                                     |
| NM_134446    | CD99L2   | 0                   | 0.460245343025897 | 1 | 2.00E-04 | 0.0114517543292161                                     |
| NM_152594    | SPRED1   | 0                   | 0.36347114947751  | 1 | 2.00E-04 | 0.0300080487943384                                     |
| NM_172374    | IL4I1    | 0                   | 0.360745115856429 | 1 | 2.00E-04 | 0.0972646828965877                                     |
| NM_199204    | DHRS9    | 0                   | 0.42480690595184  | 1 | 2.00E-04 | 0.0415757947826965,0.14316376890759,0.165284264877454  |
| NR_023353    | EXOSC7   | 0                   | 0.441163107678328 | 1 | 2.00E-04 | 0.174983789417301                                      |
| NR_037939    | HOXA10   | 0                   | 0.358927760109041 | 1 | 2.00E-04 | 0.029231021697496                                      |
| NR_045767    | C11orf45 | 0                   | 0.381644706951386 | 1 | 2.00E-04 | 0.130914404437146                                      |
| NR_047577    | IL4I1    | 0                   | 0.360745115856429 | 1 | 2.00E-04 | 0.0972646828965877                                     |

Table S7: Methylation and mRNA Expression data showing differential methylated transcripts between lean/overweight and obese subjects in SAT samples expressed by a ratio of hyper- and hypo-methylation per promoter; log FC= logarithmic fold change, represents changes in mRNA expression consistently standardized in relation to lean/overweight; fdr/FDR= false discovery

Supplementary Table 8

**Overlap methylation and mRNA expression in OVAT non-obese vs. obese**

| Transcript   | GeneName      | vis_in_obese      | vis_in_non-obese  | p_value_in_obese | p_value_in_non-obese | logFC                                                  |
|--------------|---------------|-------------------|-------------------|------------------|----------------------|--------------------------------------------------------|
| NM_000074    | <i>CD40LG</i> | 0.412994093593821 | 0                 | 2.00E-04         | 1                    | 0.0403683317665491                                     |
| NM_001005339 | <i>RGS10</i>  | 0.309859154929577 | 0                 | 2.00E-04         | 1                    | 0.0739845384275251,0.0391883258987029                  |
| NM_001015001 | <i>CKMT1A</i> | 0.394366197183099 | 0                 | 2.00E-04         | 1                    | 0.207837155184034                                      |
| NM_001037631 | <i>CTLA4</i>  | 0.492503407542026 | 0                 | 2.00E-04         | 1                    | 0.0863349559271902                                     |
| NM_001127453 | <i>DFNA5</i>  | 0.344388914129941 | 0                 | 2.00E-04         | 1                    | 0.00936005105921378                                    |
| NM_001127454 | <i>DFNA5</i>  | 0.379373012267151 | 0                 | 2.00E-04         | 1                    | 0.00936005105921378                                    |
| NM_001130713 | <i>LEF1</i>   | 0.39709223080418  | 0                 | 2.00E-04         | 1                    | 0.132422042333224                                      |
| NM_001130714 | <i>LEF1</i>   | 0.39709223080418  | 0                 | 2.00E-04         | 1                    | 0.132422042333224                                      |
| NM_001166687 | <i>PFKM</i>   | 0.334393457519309 | 0                 | 2.00E-04         | 1                    | 0.0355891371622481                                     |
| NM_001166688 | <i>PFKM</i>   | 0.334393457519309 | 0                 | 2.00E-04         | 1                    | 0.0355891371622481                                     |
| NM_001178098 | <i>CD19</i>   | 0.316674238982281 | 0                 | 2.00E-04         | 1                    | 0.156188726416297                                      |
| NM_001242413 | <i>PRKCQ</i>  | 0.331213084961381 | 0                 | 2.00E-04         | 1                    | 0.0551205334156908                                     |
| NM_001256293 | <i>KRT8</i>   | 0.505679236710586 | 0                 | 2.00E-04         | 1                    | 0.315913942723087                                      |
| NM_001256370 | <i>SAMSNI</i> | 0.500227169468423 | 0.126306224443435 | 2.00E-04         | 1                    | 0.107162022228305                                      |
| NM_001281741 | <i>UBE2C</i>  | 0.304861426624262 | 0                 | 2.00E-04         | 1                    | 0.0847010245333697                                     |
| NM_001281742 | <i>UBE2C</i>  | 0.304861426624262 | 0                 | 2.00E-04         | 1                    | 0.0847010245333697                                     |
| NM_001282644 | <i>PRKCQ</i>  | 0.331213084961381 | 0                 | 2.00E-04         | 1                    | 0.0551205334156908                                     |
| NM_001282645 | <i>PRKCQ</i>  | 0.331213084961381 | 0                 | 2.00E-04         | 1                    | 0.0551205334156908                                     |
| NM_001717    | <i>BNC1</i>   | 0.376192639709223 | 0                 | 2.00E-04         | 1                    | 0.172909543066075,0.133040889711026,0.0672912534829833 |
| NM_001770    | <i>CD19</i>   | 0.316674238982281 | 0                 | 4.00E-04         | 1                    | 0.156188726416297                                      |
| NM_001783    | <i>CD79A</i>  | 0.35620172648796  | 0                 | 2.00E-04         | 1                    | 0.0198251699950895,0.135399081231747                   |
| NM_002371    | <i>MAL</i>    | 0.361653793730123 | 0                 | 2.00E-04         | 1                    | 0.0352616681100408,0.0344187489241532                  |
| NM_004403    | <i>DFNA5</i>  | 0.379373012267151 | 0                 | 2.00E-04         | 1                    | 0.00936005105921378                                    |
| NM_005214    | <i>CTLA4</i>  | 0.492503407542026 | 0                 | 2.00E-04         | 1                    | 0.0863349559271902                                     |
| NM_006257    | <i>PRKCQ</i>  | 0.331213084961381 | 0                 | 2.00E-04         | 1                    | 0.0551205334156908                                     |
| NM_007019    | <i>UBE2C</i>  | 0.304861426624262 | 0                 | 2.00E-04         | 1                    | 0.0847010245333697                                     |
| NM_014716    | <i>ACAP1</i>  | 0.309404815992731 | 0                 | 2.00E-04         | 1                    | 0.094706923366711                                      |
| NM_016269    | <i>LEF1</i>   | 0.39709223080418  | 0                 | 2.00E-04         | 1                    | 0.132422042333224                                      |
| NM_021601    | <i>CD79A</i>  | 0.35620172648796  | 0                 | 2.00E-04         | 1                    | 0.0198251699950895,0.135399081231747                   |
| NM_022438    | <i>MAL</i>    | 0.361653793730123 | 0                 | 2.00E-04         | 1                    | 0.0352616681100408,0.0344187489241532                  |
| NM_022439    | <i>MAL</i>    | 0.361653793730123 | 0                 | 2.00E-04         | 1                    | 0.0352616681100408,0.0344187489241532                  |
| NM_022440    | <i>MAL</i>    | 0.361653793730123 | 0                 | 2.00E-04         | 1                    | 0.0352616681100408,0.0344187489241532                  |
| NM_031302    | <i>GLT8D2</i> | 0.343480236256247 | 0                 | 2.00E-04         | 1                    | 0.0319748427435909                                     |
| NM_052939    | <i>FCRL3</i>  | 0.507950931394821 | 0                 | 2.00E-04         | 1                    | -0.00507352668302419,0.0994878575241545                |
| NM_152501    | <i>PYHIN1</i> | 0.384370740572467 | 0                 | 2.00E-04         | 1                    | 0.00471292851632432                                    |
| NM_181799    | <i>UBE2C</i>  | 0.304861426624262 | 0                 | 2.00E-04         | 1                    | 0.0847010245333697                                     |
| NM_181800    | <i>UBE2C</i>  | 0.304861426624262 | 0                 | 2.00E-04         | 1                    | 0.0847010245333697                                     |

|              |          |                   |   |          |       |                                                            |
|--------------|----------|-------------------|---|----------|-------|------------------------------------------------------------|
| NM_198928    | PYHIN1   | 0.384370740572467 | 0 | 2.00E-04 | 1     | 0.00471292851632432                                        |
| NM_198929    | PYHIN1   | 0.384370740572467 | 0 | 2.00E-04 | 1     | 0.00471292851632432                                        |
| NM_198930    | PYHIN1   | 0.384370740572467 | 0 | 2.00E-04 | 1     | 0.00471292851632432                                        |
| NR_003945    | GVINP1   | 0.497046796910495 | 0 | 2.00E-04 | 1     | 0.0160011007293219                                         |
| NR_045962    | KRT8     | 0.505679236710586 | 0 | 2.00E-04 | 1     | 0.315913942723087                                          |
| NR_104036    | UBE2C    | 0.304861426624262 | 0 | 2.00E-04 | 1     | 0.0847010245333697                                         |
| NR_104037    | UBE2C    | 0.304861426624262 | 0 | 2.00E-04 | 1     | 0.0847010245333697                                         |
| NM_001098501 | KIAA1217 | 0.406633348477965 | 0 | 2.00E-04 | 1     | -0.0975707311865701                                        |
| NM_001142537 | LGALS12  | 0.387096774193548 | 0 | 2.00E-04 | 1     | -0.128257773497043                                         |
| NM_001142538 | LGALS12  | 0.387096774193548 | 0 | 2.00E-04 | 1     | -0.128257773497043                                         |
| NM_001145671 | SORBS2   | 0.819173103134939 | 0 | 2.00E-04 | 1     | -0.0208340363863346,-0.0384698113953288                    |
| NM_001145672 | SORBS2   | 0.819173103134939 | 0 | 2.00E-04 | 1     | -0.0208340363863346,-0.0384698113953288                    |
| NM_001159629 | SLC27A2  | 0.373012267151295 | 0 | 2.00E-04 | 1     | -0.38139071155339                                          |
| NM_001193635 | DHRS4L2  | 0.360290776919582 | 0 | 2.00E-04 | 1     | -0.0884042281261495                                        |
| NM_001193636 | DHRS4L2  | 0.360290776919582 | 0 | 2.00E-04 | 1     | -0.0884042281261495                                        |
| NM_001193637 | DHRS4L2  | 0.360290776919582 | 0 | 2.00E-04 | 1     | -0.0884042281261495                                        |
| NM_001198942 | DTNA     | 0.342117219445706 | 0 | 2.00E-04 | 1     | -0.119659045702296,-0.0659216765015094,-0.0694051560365658 |
| NM_001198944 | DTNA     | 0.342117219445706 | 0 | 2.00E-04 | 1     | -0.119659045702296,-0.0659216765015094,-0.0694051560365658 |
| NM_00121232  | CASQ2    | 0.74602453430259  | 0 | 2.00E-04 | 1     | -0.0424977973344547                                        |
| NM_001243723 | SETMAR   | 0.571104043616538 | 0 | 2.00E-04 | 1     | -0.0561094334467316                                        |
| NM_001252195 | C9orf24  | 0.34893230349841  | 0 | 0.0108   | 0.992 | -0.0325683679523356                                        |
| NM_001267536 | GOLGA6L4 | 0.504316219900045 | 0 | 2.00E-04 | 1     | -0.0263378582269749                                        |
| NM_001276325 | SETMAR   | 0.571104043616538 | 0 | 2.00E-04 | 1     | -0.0561094334467316                                        |
| NM_001282767 | KIAA1217 | 0.406633348477965 | 0 | 2.00E-04 | 1     | -0.0975707311865701                                        |
| NM_001282768 | KIAA1217 | 0.406633348477965 | 0 | 2.00E-04 | 1     | -0.0975707311865701                                        |
| NM_001460    | FMO2     | 0.335302135393003 | 0 | 2.00E-04 | 1     | -0.0257578947311714                                        |
| NM_001873    | CPE      | 0.422080872330759 | 0 | 2.00E-04 | 1     | -0.024353084394527                                         |
| NM_002487    | NDN      | 0.358927760109041 | 0 | 2.00E-04 | 1     | -0.0189446499455519                                        |
| NM_002591    | PCK1     | 0.364379827351204 | 0 | 2.00E-04 | 1     | -0.173538420110423                                         |
| NM_003645    | SLC27A2  | 0.373012267151295 | 0 | 2.00E-04 | 1     | -0.38139071155339                                          |
| NM_004077    | CS       | 0.388005452067242 | 0 | 2.00E-04 | 1     | -0.0775369178397791,-0.0428874243454453                    |
| NM_005863    | NET1     | 0.366197183098592 | 0 | 2.00E-04 | 1     | -0.0528739489658601,-0.0535043231986336                    |
| NM_006515    | SETMAR   | 0.571104043616538 | 0 | 2.00E-04 | 1     | -0.0561094334467316                                        |
| NM_007351    | MMRN1    | 0.466606088141754 | 0 | 2.00E-04 | 1     | -0.0530709784539778                                        |
| NM_019590    | KIAA1217 | 0.406633348477965 | 0 | 2.00E-04 | 1     | -0.0975707311865701                                        |
| NM_020185    | DUSP22   | 0.596547024079964 | 0 | 2.00E-04 | 1     | -0.058784536957567                                         |
| NM_020531    | APMAP    | 0.400726942298955 | 0 | 2.00E-04 | 1     | -0.107099643309707                                         |
| NM_024919    | FRMD1    | 0.318491594729668 | 0 | 2.00E-04 | 1     | -0.014030174370413                                         |
| NM_030572    | C12orf39 | 0.313948205361199 | 0 | 2.00E-04 | 1     | -0.0762078793333132                                        |
| NM_032980    | DTNA     | 0.367105860972285 | 0 | 2.00E-04 | 1     | -0.119659045702296,-0.0659216765015094,-0.0694051560365658 |
| NM_032981    | DTNA     | 0.367105860972285 | 0 | 2.00E-04 | 1     | -0.119659045702296,-0.0659216765015094,-0.0694051560365658 |

|              |                 |                    |                   |          |          |                                                            |
|--------------|-----------------|--------------------|-------------------|----------|----------|------------------------------------------------------------|
| NM_147168    | <i>C9orf24</i>  | 0.34893230349841   | 0                 | 0.0126   | 0.9902   | -0.0325683679523356                                        |
| NM_147169    | <i>C9orf24</i>  | 0.34893230349841   | 0                 | 0.0118   | 0.988    | -0.0325683679523356                                        |
| NM_152430    | <i>OR51E1</i>   | 0.396183552930486  | 0                 | 2.00E-04 | 1        | -0.0872920353808211                                        |
| NM_198503    | <i>KCNT2</i>    | 0.588823262153567  | 0                 | 2.00E-04 | 1        | -0.00671382354809835                                       |
| NM_198836    | <i>ACACA</i>    | 0.301681054066333  | 0                 | 2.00E-04 | 1        | -0.0770009438776116,-0.074125755381321                     |
| NR_024022    | <i>SETMAR</i>   | 0.43071331213085   | 0                 | 2.00E-04 | 1        | -0.0561094334467316                                        |
| NR_073040    | <i>NET1</i>     | 0.366197183098592  | 0                 | 2.00E-04 | 1        | -0.0528739489658601,-0.0535043231986336                    |
| NR_075073    | <i>SETMAR</i>   | 0.571104043616538  | 0                 | 2.00E-04 | 1        | -0.0561094334467316                                        |
| NM_000072    | <i>CD36</i>     | 0                  | 0.307587460245343 | 1        | 2.00E-04 | -0.14273229978235                                          |
| NM_000132    | <i>F8</i>       | 0                  | 0.313493866424353 | 1        | 2.00E-04 | -0.0402749425110498                                        |
| NM_001001548 | <i>CD36</i>     | 0                  | 0.307587460245343 | 1        | 2.00E-04 | -0.14273229978235                                          |
| NM_001029851 | <i>PDE8B</i>    | 0                  | 0.370286233530214 | 1        | 2.00E-04 | -0.100345386506422,-0.0581691351367304                     |
| NM_001029852 | <i>PDE8B</i>    | 0                  | 0.370286233530214 | 1        | 2.00E-04 | -0.100345386506422,-0.0581691351367304                     |
| NM_001029853 | <i>PDE8B</i>    | 0                  | 0.370286233530214 | 1        | 2.00E-04 | -0.100345386506422,-0.0581691351367304                     |
| NM_001029854 | <i>PDE8B</i>    | 0                  | 0.370286233530214 | 1        | 2.00E-04 | -0.100345386506422,-0.0581691351367304                     |
| NM_001076552 | <i>ACSS2</i>    | 0                  | 0.335302135393003 | 1        | 2.00E-04 | -0.059240612128201,-0.0668829629177501                     |
| NM_001122752 | <i>SERPINI1</i> | 0                  | 0.462517037710132 | 1        | 2.00E-04 | -0.0643231005674496                                        |
| NM_001142966 | <i>GREB1L</i>   | 0                  | 0.423898228078146 | 1        | 2.00E-04 | -0.0906520489763953                                        |
| NM_001167820 | <i>BLCAP</i>    | 0.0495229441163108 | 0.582008178100863 | 1        | 2.00E-04 | -0.0263159707281955                                        |
| NM_001167821 | <i>BLCAP</i>    | 0                  | 0.582008178100863 | 1        | 2.00E-04 | -0.0263159707281955                                        |
| NM_001167822 | <i>BLCAP</i>    | 0                  | 0.582008178100863 | 1        | 2.00E-04 | -0.0263159707281955                                        |
| NM_001167823 | <i>BLCAP</i>    | 0                  | 0.435711040436165 | 1        | 2.00E-04 | -0.0263159707281955                                        |
| NM_001190880 | <i>HYI</i>      | 0                  | 0.309404815992731 | 1        | 2.00E-04 | -0.0572961891103001                                        |
| NM_001198713 | <i>SEPT04</i>   | 0                  | 0.346660608814175 | 1        | 2.00E-04 | -0.124065990087982,-0.138745465175068                      |
| NM_001198945 | <i>DTNA</i>     | 0                  | 0.317128577919128 | 1        | 2.00E-04 | -0.119659045702296,-0.0659216765015094,-0.0694051560365658 |
| NM_001199758 | <i>MTHFS</i>    | 0                  | 0.405724670604271 | 1        | 2.00E-04 | -0.082850898834665                                         |
| NM_001199898 | <i>PDK2</i>     | 0                  | 0.334393457519309 | 1        | 2.00E-04 | -0.0737361055916692                                        |
| NM_001199899 | <i>PDK2</i>     | 0                  | 0.594275329395729 | 1        | 2.00E-04 | -0.0737361055916692                                        |
| NM_001199900 | <i>PDK2</i>     | 0                  | 0.440254429804634 | 1        | 2.00E-04 | -0.0737361055916692                                        |
| NM_001200047 | <i>NMNAT3</i>   | 0                  | 0.358019082235348 | 1        | 2.00E-04 | -0.013889232883399,-0.0375825984745715                     |
| NM_001242393 | <i>ACSS2</i>    | 0                  | 0.36937755565652  | 1        | 2.00E-04 | -0.059240612128201,-0.0668829629177501                     |
| NM_001242902 | <i>AKAP1</i>    | 0                  | 0.308496138119037 | 1        | 2.00E-04 | -0.00839158347936753                                       |
| NM_001242903 | <i>AKAP1</i>    | 0                  | 0.308496138119037 | 1        | 2.00E-04 | -0.00839158347936753                                       |
| NM_001242936 | <i>FAM47E</i>   | 0                  | 0.492503407542026 | 1        | 2.00E-04 | -0.0761473351929371                                        |
| NM_001243526 | <i>HYI</i>      | 0                  | 0.309404815992731 | 1        | 2.00E-04 | -0.0572961891103001                                        |
| NM_001243611 | <i>LMO3</i>     | 0                  | 0.507496592457974 | 1        | 2.00E-04 | -0.182371077990691                                         |
| NM_001243728 | <i>ATPAF1</i>   | 0                  | 0.359382099045888 | 1        | 2.00E-04 | -0.0275676829047637                                        |
| NM_001256418 | <i>ATPAF1</i>   | 0                  | 0.359382099045888 | 1        | 2.00E-04 | -0.0275676829047637                                        |
| NM_001256782 | <i>SEPT04</i>   | 0                  | 0.346660608814175 | 1        | 2.00E-04 | -0.124065990087982,-0.138745465175068                      |
| NM_001270622 | <i>SLC16A7</i>  | 0                  | 0.306224443434802 | 1        | 2.00E-04 | -0.0462289211148648                                        |
| NM_001270623 | <i>SLC16A7</i>  | 0                  | 0.306224443434802 | 1        | 2.00E-04 | -0.0462289211148648                                        |

|              |          |                    |                   |   |          |                                                            |
|--------------|----------|--------------------|-------------------|---|----------|------------------------------------------------------------|
| NM_001278590 | LIAS     | 0.084961381190368  | 0.433439345751931 | 1 | 2.00E-04 | -0.0629417183255363                                        |
| NM_001278591 | LIAS     | 0.084961381190368  | 0.433439345751931 | 1 | 2.00E-04 | -0.0629417183255363                                        |
| NM_001278592 | LIAS     | 0.084961381190368  | 0.433439345751931 | 1 | 2.00E-04 | -0.0629417183255363                                        |
| NM_001392    | DTNA     | 0                  | 0.317128577919128 | 1 | 2.00E-04 | -0.119659045702296,-0.0659216765015094,-0.0694051560365658 |
| NM_002611    | PDK2     | 0                  | 0.440254429804634 | 1 | 2.00E-04 | -0.0737361055916692                                        |
| NM_002840    | PTPRF    | 0                  | 0.507496592457974 | 1 | 2.00E-04 | -0.0847630241879331,-0.0640174554538571                    |
| NM_003719    | PDE8B    | 0                  | 0.370286233530214 | 1 | 2.00E-04 | -0.100345386506422,-0.0581691351367304                     |
| NM_003849    | SUCLG1   | 0                  | 0.407996365288505 | 1 | 2.00E-04 | -0.0548320130188058                                        |
| NM_004731    | SLC16A7  | 0                  | 0.364379827351204 | 1 | 2.00E-04 | -0.0462289211148648                                        |
| NM_004982    | KCNJ8    | 0                  | 0.922762380736029 | 1 | 2.00E-04 | -0.0447925230779092                                        |
| NM_005025    | SERPINI1 | 0                  | 0.44525215810995  | 1 | 2.00E-04 | -0.0643231005674496                                        |
| NM_005160    | ADRBK2   | 0                  | 0.515674693321218 | 1 | 2.00E-04 | -0.0364003381675517                                        |
| NM_005228    | EGFR     | 0                  | 0.485688323489323 | 1 | 2.00E-04 | -0.0565569454349411                                        |
| NM_005923    | MAP3K5   | 0                  | 0.481599273057701 | 1 | 2.00E-04 | -0.13893620516986                                          |
| NM_006441    | MTHFS    | 0                  | 0.499772830531577 | 1 | 2.00E-04 | -0.082850898834665                                         |
| NM_006698    | BLCAP    | 0.0495229441163108 | 0.582008178100863 | 1 | 2.00E-04 | -0.0263159707281955                                        |
| NM_006859    | LIAS     | 0.084961381190368  | 0.433439345751931 | 1 | 2.00E-04 | -0.0629417183255363                                        |
| NM_012259    | HEY2     | 0                  | 0.31531122217174  | 1 | 2.00E-04 | -0.110125797984385                                         |
| NM_012419    | RGS17    | 0                  | 0.327124034529759 | 1 | 2.00E-04 | -0.0795496565245908                                        |
| NM_016453    | NCKIPSD  | 0                  | 0.309859154929577 | 1 | 2.00E-04 | -0.00815260213655167                                       |
| NM_018677    | ACSS2    | 0                  | 0.335302135393003 | 1 | 2.00E-04 | -0.059240612128201,-0.0668829629177501                     |
| NM_020211    | RGMA     | 0                  | 0.357110404361654 | 1 | 2.00E-04 | -0.0457149726789847                                        |
| NM_021244    | RRAGD    | 0                  | 0.333484779645616 | 1 | 2.00E-04 | -0.0728684146120644                                        |
| NM_031207    | HYI      | 0                  | 0.309404815992731 | 1 | 2.00E-04 | -0.0572961891103001                                        |
| NM_032593    | HINT2    | 0                  | 0.313039527487506 | 1 | 2.00E-04 | -0.0617817422373088                                        |
| NM_032975    | DTNA     | 0                  | 0.317128577919128 | 1 | 2.00E-04 | -0.119659045702296,-0.0659216765015094,-0.0694051560365658 |
| NM_032979    | DTNA     | 0                  | 0.317128577919128 | 1 | 2.00E-04 | -0.119659045702296,-0.0659216765015094,-0.0694051560365658 |
| NM_130440    | PTPRF    | 0                  | 0.507496592457974 | 1 | 2.00E-04 | -0.0847630241879331,-0.0640174554538571                    |
| NM_134268    | CYGB     | 0                  | 0.332121762835075 | 1 | 2.00E-04 | -0.118429729706158                                         |
| NM_178177    | NMNAT3   | 0                  | 0.358019082235348 | 1 | 2.00E-04 | -0.013889232883399,-0.0375825984745715                     |
| NM_184231    | NCKIPSD  | 0                  | 0.309859154929577 | 1 | 2.00E-04 | -0.00815260213655167                                       |
| NM_194451    | LIAS     | 0.084961381190368  | 0.433439345751931 | 1 | 2.00E-04 | -0.0629417183255363                                        |
| NM_199050    | C2CD2    | 0                  | 0.314856883234893 | 1 | 2.00E-04 | -0.0532083305056572,-0.0942744104388944                    |
| NM_201282    | EGFR     | 0                  | 0.485688323489323 | 1 | 2.00E-04 | -0.0565569454349411                                        |
| NM_201283    | EGFR     | 0                  | 0.485688323489323 | 1 | 2.00E-04 | -0.0565569454349411                                        |
| NM_201284    | EGFR     | 0                  | 0.485688323489323 | 1 | 2.00E-04 | -0.0565569454349411                                        |
| NR_037654    | MTHFS    | 0                  | 0.523398455247615 | 1 | 2.00E-04 | -0.082850898834665                                         |
| NR_073055    | SLC16A7  | 0                  | 0.364379827351204 | 1 | 2.00E-04 | -0.0462289211148648                                        |
| NR_073056    | SLC16A7  | 0                  | 0.364379827351204 | 1 | 2.00E-04 | -0.0462289211148648                                        |
| NM_000378    | WT1      | 0                  | 0.378464334393458 | 1 | 2.00E-04 | 0.1131821276639,0.0894832431563402                         |
| NM_000495    | COL4A5   | 0                  | 0.381644706951386 | 1 | 2.00E-04 | 0.0906787927558659                                         |

|              |                  |                    |                   |   |          |                                       |
|--------------|------------------|--------------------|-------------------|---|----------|---------------------------------------|
| NM_001008844 | <i>DSP</i>       | 0                  | 0.472058155383916 | 1 | 2.00E-04 | 0.134024318349841                     |
| NM_001130716 | <i>PLAC8</i>     | 0                  | 0.358473421172194 | 1 | 2.00E-04 | 0.12440938860437,0.0660544354793993   |
| NM_001136528 | <i>SERPINE2</i>  | 0                  | 0.417083144025443 | 1 | 2.00E-04 | 0.0913789055646195                    |
| NM_001161661 | <i>WWC1</i>      | 0                  | 0.352112676056338 | 1 | 2.00E-04 | 0.180712980246713                     |
| NM_001161662 | <i>WWC1</i>      | 0                  | 0.352112676056338 | 1 | 2.00E-04 | 0.180712980246713                     |
| NM_001189    | <i>NKX3-2</i>    | 0                  | 0.433439345751931 | 1 | 2.00E-04 | 0.0869725019484169                    |
| NM_001523    | <i>HAS1</i>      | 0                  | 0.316219900045434 | 1 | 2.00E-04 | 0.333929924287145                     |
| NM_002581    | <i>PAPPA</i>     | 0                  | 0.302589731940027 | 1 | 2.00E-04 | 0.0322764293948901                    |
| NM_002922    | <i>RGS1</i>      | 0                  | 0.641526578827806 | 1 | 2.00E-04 | 0.110072419788595                     |
| NM_004319    | <i>ASTN1</i>     | 0                  | 0.342571558382553 | 1 | 2.00E-04 | 0.0538059968743954                    |
| NM_004415    | <i>DSP</i>       | 0                  | 0.472058155383916 | 1 | 2.00E-04 | 0.134024318349841                     |
| NM_005077    | <i>TLE1</i>      | 0                  | 0.429804634257156 | 1 | 2.00E-04 | 0.00368007010372473                   |
| NM_006113    | <i>VAV3</i>      | 0                  | 0.39709223080418  | 1 | 2.00E-04 | 0.013590242710092                     |
| NM_006216    | <i>SERPINE2</i>  | 0                  | 0.417083144025443 | 1 | 2.00E-04 | 0.0913789055646195                    |
| NM_006950    | <i>SYN1</i>      | 0                  | 0.367105860972285 | 1 | 2.00E-04 | 0.0971863553754737                    |
| NM_014376    | <i>CYFIP2</i>    | 0.142208087233076  | 0.56065424806906  | 1 | 2.00E-04 | 0.0873886445820624,0.0964789882186841 |
| NM_014452    | <i>TNFRSF21</i>  | 0                  | 0.569741026805997 | 1 | 2.00E-04 | 0.0388524867480138                    |
| NM_015238    | <i>WWC1</i>      | 0                  | 0.352112676056338 | 1 | 2.00E-04 | 0.180712980246713                     |
| NM_020980    | <i>AQP9</i>      | 0                  | 0.448432530667878 | 1 | 2.00E-04 | 0.133322814267267                     |
| NM_024424    | <i>WT1</i>       | 0                  | 0.378464334393458 | 1 | 2.00E-04 | 0.1131821276639,0.0894832431563402    |
| NM_024426    | <i>WT1</i>       | 0                  | 0.378464334393458 | 1 | 2.00E-04 | 0.1131821276639,0.0894832431563402    |
| NM_033380    | <i>COL4A5</i>    | 0                  | 0.381644706951386 | 1 | 2.00E-04 | 0.0906787927558659                    |
| NM_133499    | <i>SYN1</i>      | 0                  | 0.367105860972285 | 1 | 2.00E-04 | 0.0971863553754737                    |
| NM_198353    | <i>KCTD8</i>     | 0.0218082689686506 | 0.447978191731031 | 1 | 2.00E-04 | 0.0341810101735576                    |
| NM_207108    | <i>ASTN1</i>     | 0                  | 0.342571558382553 | 1 | 2.00E-04 | 0.0538059968743954                    |
| NR_003679    | <i>HAND2-AS1</i> | 0                  | 0.360745115856429 | 1 | 2.00E-04 | 0.00376786064945822                   |
| NR_023920    | <i>WT1-AS</i>    | 0                  | 0.333939118582463 | 1 | 2.00E-04 | 0.117871745180006,0.12626983390515    |

Table S8: Methylation and mRNA Expression data showing differential methylated transcripts between lean/overweight and obese subjects in OVAT samples expressed by a ratio of hyper- and hypomethylation per promoter; log FC= logarithmic fold change, represents changes in mRNA expression consistently standardized in relation to lean/overweight; fdr/FDR= false discovery rate; brown



## Supplementary Table 9

| SAT vs. OVAT |           |    |                |            |                      |                                  |          |           |                      |
|--------------|-----------|----|----------------|------------|----------------------|----------------------------------|----------|-----------|----------------------|
| Gene         | Probe ID  | N  | Pyrosequencing |            |                      | MeDIP-array Promoter Methylation |          |           |                      |
|              |           |    | SAT            | OVAT       | <i>P</i> -value      | N                                | SAT      | OVAT      | <i>P</i> -value      |
| <i>HOXD3</i> | 176736323 | 63 | 40.36±13.3     | 20.01±13.4 | <1x10 <sup>-13</sup> | 77                               | 0.13±0.2 | -0.01±0.1 | <1x10 <sup>-10</sup> |
| <i>HOXD4</i> | 176723238 | 72 | 44.13±14.9     | 27.15±16.6 | <1x10 <sup>-8</sup>  | 77                               | 0.20±0.1 | 0.1±0.1   | <1x10 <sup>-9</sup>  |
|              | 176724282 | 70 | 79.60±9.5      | 58.44±15.5 | <1x10 <sup>-15</sup> |                                  |          |           |                      |

Supplementary Table 9 shows results for DNA methylation of HOXD3 and HOXD4, either measured by pyrosequencing or MeDIP-array method. The distance of the probes relative to the transcription start site (TSS) was -728 bp; -1121 bp and -77 bp, respectively. Data are mean ± SD. Pyrosequencing data was generated in the same sample set as the initial array data.

## Supplementary Table 10

### Cluster

| Annotation Cluster 1            |       |       |        |                                                         |            |          |           |                 |            |           |        |
|---------------------------------|-------|-------|--------|---------------------------------------------------------|------------|----------|-----------|-----------------|------------|-----------|--------|
| Term                            | Count | %     | PValue | Genes                                                   | List Total | Pop Hits | Pop Total | Fold Enrichment | Bonferroni | Benjamini | FDR    |
| <b>Enrichment Score: 1.8717</b> |       |       |        |                                                         |            |          |           |                 |            |           |        |
| GOTERM_MF_FAT                   | 4     | 1.338 | 0.006  | HAND2, PPARC, RUNX1, HSD17B8                            | 24         | 208      | 12983     | 10.063          | 0.517      | 0.305     | 6.387  |
| GOTERM_MF_FAT                   | 5     | 1.672 | 0.012  | HOXC6, HAND2, PPARC, RUNX1, HSD17B8                     | 24         | 513      | 12983     | 5.272           | 0.779      | 0.315     | 12.81  |
| GOTERM_MF_FAT                   | 5     | 1.672 | 0.014  | TCF21, HAND2, PPARC, RUNX1, HSD17B8                     | 24         | 542      | 12983     | 4.99            | 0.838      | 0.262     | 15.243 |
| GOTERM_MF_FAT                   | 4     | 1.338 | 0.035  | HAND2, PPARC, RUNX1, HSD17B8                            | 24         | 410      | 12983     | 5.278           | 0.989      | 0.475     | 33.612 |
| <b>Annotation Cluster 2</b>     |       |       |        |                                                         |            |          |           |                 |            |           |        |
| <b>Enrichment Score: 1.6523</b> |       |       |        |                                                         |            |          |           |                 |            |           |        |
| GOTERM_BP_FAT                   | 5     | 1.672 | 0.009  | TCF21, MEOX1, HAND2, PPARC, RUNX1                       | 25         | 477      | 13528     | 5.672           | 0.977      | 0.977     | 12.196 |
| GOTERM_BP_FAT                   | 5     | 1.672 | 0.01   | TCF21, MEOX1, HAND2, PPARC, RUNX1                       | 25         | 481      | 13528     | 5.625           | 0.98       | 0.857     | 12.531 |
| GOTERM_BP_FAT                   | 5     | 1.672 | 0.016  | TCF21, MEOX1, HAND2, PPARC, RUNX1                       | 25         | 564      | 13528     | 4.797           | 0.999      | 0.893     | 20.589 |
| GOTERM_BP_FAT                   | 5     | 1.672 | 0.018  | TCF21, MEOX1, HAND2, PPARC, RUNX1                       | 25         | 581      | 13528     | 4.657           | 0.999      | 0.843     | 22.487 |
| GOTERM_BP_FAT                   | 5     | 1.672 | 0.023  | TCF21, MEOX1, HAND2, PPARC, RUNX1                       | 25         | 624      | 13528     | 4.336           | 1          | 0.848     | 27.608 |
| GOTERM_BP_FAT                   | 5     | 1.672 | 0.025  | TCF21, MEOX1, HAND2, PPARC, RUNX1                       | 25         | 644      | 13528     | 4.201           | 1          | 0.775     | 30.126 |
| GOTERM_BP_FAT                   | 5     | 1.672 | 0.027  | TCF21, MEOX1, HAND2, PPARC, RUNX1                       | 25         | 654      | 13528     | 4.137           | 1          | 0.746     | 31.413 |
| GOTERM_BP_FAT                   | 4     | 1.338 | 0.027  | MEOX1, HAND2, PPARC, RUNX1                              | 25         | 371      | 13528     | 5.834           | 1          | 0.71      | 31.826 |
| GOTERM_BP_FAT                   | 5     | 1.672 | 0.031  | TCF21, MEOX1, HAND2, PPARC, RUNX1                       | 25         | 685      | 13528     | 3.95            | 1          | 0.721     | 35.503 |
| GOTERM_BP_FAT                   | 5     | 1.672 | 0.032  | TCF21, MEOX1, HAND2, PPARC, RUNX1                       | 25         | 695      | 13528     | 3.893           | 1          | 0.704     | 36.849 |
| GOTERM_BP_FAT                   | 5     | 1.672 | 0.062  | TCF21, MEOX1, HAND2, PPARC, RUNX1                       | 25         | 857      | 13528     | 3.157           | 1          | 0.823     | 59.01  |
| <b>Annotation Cluster 3</b>     |       |       |        |                                                         |            |          |           |                 |            |           |        |
| <b>Enrichment Score: 1.5616</b> |       |       |        |                                                         |            |          |           |                 |            |           |        |
| GOTERM_MF_FAT                   | 6     | 2.007 | 0.004  | HOXC6, TCF21, MEOX1, HAND2, PPARC, ETV6                 | 24         | 607      | 12983     | 5.347           | 0.375      | 0.375     | 4.174  |
| GOTERM_MF_FAT                   | 7     | 2.341 | 0.006  | HOXC6, TCF21, MEOX1, HAND2, PPARC, ETV6, RUNX1          | 24         | 975      | 12983     | 3.884           | 0.53       | 0.222     | 6.617  |
| GOTERM_MF_FAT                   | 8     | 2.676 | 0.013  | HOXC6, TCF21, MEOX1, HAND2, PPARC, ETV6, RUNX1, HSD17B8 | 24         | 1512     | 12983     | 2.862           | 0.813      | 0.285     | 14.127 |

### transcriptional regulation

### positive regulation of transcription

| SP_PIR_KEYWORDS                 | transcription regulation                                        | 8  | 2.676 | 0.033 | HOXC6, TCF21, MEOX1, HAND2, PPARC, AFF3, ETV6, RUNX1                 | 31 | 2026 | 19235 | 2.45  | 0.963 | 0.808 | 31,059 |
|---------------------------------|-----------------------------------------------------------------|----|-------|-------|----------------------------------------------------------------------|----|------|-------|-------|-------|-------|--------|
| GOTERM_BP_FAT                   | GO:0063555-regulation of transcription, DNA-dependent           | 7  | 2.341 | 0.084 | HOXC6, TCF21, MEOX1, HAND2, PPARC, ETV6, RUNX1                       | 25 | 1773 | 13528 | 2.136 | 1     | 0.894 | 70,863 |
| GOTERM_BP_FAT                   | GO:0051252-regulation of RNA metabolic process                  | 7  | 2.341 | 0.092 | HOXC6, TCF21, MEOX1, HAND2, PPARC, ETV6, RUNX1                       | 25 | 1813 | 13528 | 2.089 | 1     | 0.873 | 74,05  |
| GOTERM_BP_FAT                   | GO:0045449-regulation of transcription                          | 8  | 2.676 | 0.163 | HOXC6, TCF21, MEOX1, HAND2, PPARC, AFF3, ETV6, RUNX1                 | 25 | 2601 | 13528 | 1.664 | 1     | 0.944 | 91,649 |
| <b>Annotation Cluster 4</b>     |                                                                 |    |       |       |                                                                      |    |      |       |       |       |       |        |
| <b>Enrichment Score: 1.1920</b> |                                                                 |    |       |       |                                                                      |    |      |       |       |       |       |        |
| SP_PIR_KEYWORDS                 | transcription regulation                                        | 9  | 3.01  | 0.006 | HOXC6, TCF21, MEOX1, HAND2, SETMAR, PPARC, AFF3, ETV6, RUNX1         | 31 | 1868 | 19235 | 2.989 | 0.472 | 0.472 | 6,951  |
| SP_PIR_KEYWORDS                 | transcription regulation                                        | 8  | 2.676 | 0.033 | HOXC6, TCF21, MEOX1, HAND2, PPARC, AFF3, ETV6, RUNX1                 | 31 | 2026 | 19235 | 2.45  | 0.963 | 0.808 | 31,059 |
| GOTERM_MF_FAT                   | GO:003677-DNA binding                                           | 9  | 3.01  | 0.041 | HOXC6, TCF21, MEOX1, HAND2, SETMAR, PPARC, AFF3, ETV6, RUNX1         | 24 | 2331 | 12983 | 2.089 | 0.995 | 0.488 | 38,519 |
| SP_PIR_KEYWORDS                 | Transcription                                                   | 7  | 2.341 | 0.097 | HOXC6, TCF21, MEOX1, HAND2, PPARC, AFF3, ETV6, RUNX1                 | 31 | 2071 | 19235 | 2.097 | 1     | 0.917 | 67,545 |
| GOTERM_BP_FAT                   | GO:006350-transcription                                         | 7  | 2.341 | 0.157 | HOXC6, TCF21, MEOX1, HAND2, PPARC, AFF3, ETV6, RUNX1                 | 25 | 2101 | 13528 | 1.803 | 1     | 0.945 | 90,861 |
| GOTERM_BP_FAT                   | GO:0045449-regulation of transcription                          | 8  | 2.676 | 0.163 | HOXC6, TCF21, MEOX1, HAND2, PPARC, AFF3, ETV6, RUNX1                 | 25 | 2601 | 13528 | 1.664 | 1     | 0.944 | 91,649 |
| SP_PIR_KEYWORDS                 | nucleus                                                         | 10 | 3.344 | 0.208 | HOXC6, TCF21, MEOX1, HAND2, SETMAR, PPARC, DUSP22, AFF3, ETV6, RUNX1 | 31 | 4283 | 19235 | 1.449 | 1     | 0.942 | 92,382 |
| <b>Annotation Cluster 5</b>     |                                                                 |    |       |       |                                                                      |    |      |       |       |       |       |        |
| <b>Enrichment Score: 0.7762</b> |                                                                 |    |       |       |                                                                      |    |      |       |       |       |       |        |
| GOTERM_BP_FAT                   | GO:0043009-chordate embryonic development                       | 3  | 1.003 | 0.116 | HOXC6, MEOX1, HAND2                                                  | 25 | 331  | 13528 | 4.904 | 1     | 0.918 | 82,133 |
| GOTERM_BP_FAT                   | GO:009792-embryonic development ending in birth or egg hatching | 3  | 1.003 | 0.118 | HOXC6, MEOX1, HAND2                                                  | 25 | 334  | 13528 | 4.86  | 1     | 0.912 | 82,619 |
| SP_PIR_KEYWORDS                 | developmental protein                                           | 3  | 1.003 | 0.344 | HOXC6, MEOX1, HAND2                                                  | 31 | 779  | 19235 | 2.39  | 1     | 0.977 | 99,061 |
| <b>Annotation Cluster 6</b>     |                                                                 |    |       |       |                                                                      |    |      |       |       |       |       |        |
| <b>Enrichment Score: 0.7604</b> |                                                                 |    |       |       |                                                                      |    |      |       |       |       |       |        |
| GOTERM_CC_FAT                   | GO:0016023-cytoplasmic membrane-bounded vesicle                 | 3  | 1.003 | 0.149 | CD36, ATP6V1B2, SSPN                                                 | 17 | 550  | 12782 | 4.101 | 1     | 0.993 | 82,896 |
| GOTERM_CC_FAT                   | GO:0031988-membrane-bounded vesicle                             | 3  | 1.003 | 0.157 | CD36, ATP6V1B2, SSPN                                                 | 17 | 568  | 12782 | 3.971 | 1     | 0.98  | 84,555 |
| GOTERM_CC_FAT                   | GO:0031410-cytoplasmic vesicle                                  | 3  | 1.003 | 0.191 | CD36, ATP6V1B2, SSPN                                                 | 17 | 642  | 12782 | 3.513 | 1     | 0.98  | 90,064 |
| GOTERM_CC_FAT                   | GO:0031982-vesicle                                              | 3  | 1.003 | 0.203 | CD36, ATP6V1B2, SSPN                                                 | 17 | 670  | 12782 | 3.567 | 1     | 0.969 | 91,664 |

Supplementary Table 10: represents results from the gene ontology using DAVID (<https://david.ncifcrf.gov/>) with default settings, high classification stringency. Categories  $\leq 0.5$  (cut off) enrichment score were presented in figure 6

Supplementary Table 11. Linear regression analyses for anthropometric traits in SAT

| Gene ID           | SAT Transcript | BMI          |         |       | body fat |              |         | CT-ratio     |         |              | Waist   |              |         | HIP          |         |        | WHR     |   |         | subcutaneous-fat area |         |   | visceral fat area |  |  |
|-------------------|----------------|--------------|---------|-------|----------|--------------|---------|--------------|---------|--------------|---------|--------------|---------|--------------|---------|--------|---------|---|---------|-----------------------|---------|---|-------------------|--|--|
|                   |                | P            | $\beta$ | P     | $\beta$  | P            | $\beta$ | P            | $\beta$ | P            | $\beta$ | P            | $\beta$ | P            | $\beta$ | P      | $\beta$ | P | $\beta$ | P                     | $\beta$ | P | $\beta$           |  |  |
| <i>HOXC6</i>      | NM_004503      | 0.199        | 0.213   | 0.963 | 0.006    | 0.130        | -0.747  | 0.446        | -0.062  | 0.907        | -0.007  | 0.45         | -0.053  | 0.203        | 0.534   | -0.234 |         |   |         |                       |         |   |                   |  |  |
| <i>MEOX1*</i>     | NM_013999*     | 0.463        | 0.105   | 0.938 | 0.010    | 0.641        | 0.204   | 0.899        | -0.009  | 0.757        | 0.018   | 0.69         | -0.025  | 0.948        | 0.024   | 0.217  |         |   |         |                       |         |   |                   |  |  |
| <i>PPARG</i>      | NM_005037      | 0.794        | -0.036  | 0.394 | -0.095   | 0.203        | -0.551  | 0.872        | -0.011  | 0.429        | -0.044  | 0.626        | 0.03    | 0.368        | 0.332   | -0.214 |         |   |         |                       |         |   |                   |  |  |
| <i>PPARG (2)</i>  | NM_138711      | 0.981        | 0.004   | 0.756 | -0.038   | <b>0.007</b> | -1.199  | 0.801        | -0.019  | 0.489        | -0.041  | 0.763        | 0.020   | 0.112        | 0.61    | -0.579 |         |   |         |                       |         |   |                   |  |  |
| <i>CKMT1B</i>     | NM_020990      | <b>0.003</b> | 0.341   | 0.336 | -0.089   | 0.726        | 0.129   | 0.792        | 0.016   | 0.388        | -0.041  | 0.284        | 0.056   | 0.466        | -0.228  | -0.107 |         |   |         |                       |         |   |                   |  |  |
| <i>HAND2</i>      | NM_021973      | 0.097        | -0.233  | 0.110 | -0.198   | 0.065        | -0.789  | 0.749        | -0.023  | 0.27         | 0.061   | 0.173        | -0.083  | 0.516        | 0.238   | -0.562 |         |   |         |                       |         |   |                   |  |  |
| <i>TCF21</i>      | NM_198392      | 0.161        | -0.212  | 0.609 | -0.061   | 0.403        | 0.404   | <b>0.028</b> | -0.171  | 0.225        | -0.075  | 0.157        | -0.097  | 0.335        | -0.395  | 0.022  |         |   |         |                       |         |   |                   |  |  |
| <i>CKMT1A</i>     | NM_001015001   | 0.556        | 0.061   | 0.464 | -0.057   | 0.523        | 0.208   | 0.641        | -0.025  | 0.379        | -0.037  | 0.798        | 0.012   | 0.484        | -0.193  | 0.009  |         |   |         |                       |         |   |                   |  |  |
| <i>AFF3</i>       | NM_001025108   | 0.598        | -0.078  | 0.761 | 0.041    | 0.115        | 0.689   | 0.781        | 0.02    | 0.867        | 0.010   | 0.896        | 0.008   | 0.056        | -0.705  | -0.035 |         |   |         |                       |         |   |                   |  |  |
| <i>CD36</i>       | NM_001127443   | 0.783        | -0.029  | 0.609 | -0.045   | <b>0.037</b> | -0.644  | 0.078        | -0.089  | 0.575        | 0.023   | <b>0.010</b> | -0.112  | 0.101        | 0.432   | -0.211 |         |   |         |                       |         |   |                   |  |  |
| <i>FAM25C</i>     | NM_001137548   | 0.27         | 0.175   | 0.872 | 0.02     | 0.875        | -0.077  | 0.543        | 0.049   | 0.975        | 0.002   | 0.482        | 0.049   | 0.762        | -0.125  | -0.229 |         |   |         |                       |         |   |                   |  |  |
| <i>PHLDB1*</i>    | NM_001144759*  | 0.734        | 0.055   | 0.653 | -0.062   | 0.241        | -0.563  | 0.210        | -0.098  | 0.617        | -0.031  | 0.331        | -0.066  | <b>0.037</b> | 0.838   | 0.262  |         |   |         |                       |         |   |                   |  |  |
| <i>SORBS2</i>     | NM_001145671   | 0.503        | 0.066   | 0.255 | -0.089   | 0.655        | 0.134   | 0.300        | -0.051  | 0.351        | -0.036  | 0.716        | -0.015  | 0.673        | -0.107  | 0.031  |         |   |         |                       |         |   |                   |  |  |
| <i>SORBS2 (2)</i> | NM_001145672   | 0.547        | 0.059   | 0.541 | -0.048   | 0.518        | 0.188   | 0.505        | -0.032  | 0.523        | -0.024  | 0.841        | -0.008  | 0.508        | -0.164  | 0.027  |         |   |         |                       |         |   |                   |  |  |
| <i>CLDN1</i>      | NM_021101      | <b>0.028</b> | -0.303  | 0.275 | -0.126   | 0.222        | -0.533  | 0.705        | 0.027   | 0.228        | 0.068   | 0.513        | -0.041  | 0.441        | 0.286   | -0.264 |         |   |         |                       |         |   |                   |  |  |
| <i>CASQ2</i>      | NM_001232      | 0.721        | 0.035   | 0.669 | -0.034   | <b>0.028</b> | 0.66    | 0.170        | -0.070  | 0.604        | -0.021  | 0.262        | -0.050  | 0.403        | -0.216  | 0.446  |         |   |         |                       |         |   |                   |  |  |
| <i>ATP6V1B2</i>   | NM_001693      | 0.109        | -0.194  | 0.912 | -0.011   | 0.621        | 0.182   | 0.363        | 0.055   | 0.087        | 0.081   | 0.609        | -0.027  | 0.35         | -0.291  | -0.108 |         |   |         |                       |         |   |                   |  |  |
| <i>RUNX1</i>      | NM_001754      | 0.225        | -0.135  | 0.926 | -0.009   | <b>0.002</b> | 1.006   | 0.508        | -0.036  | 0.887        | 0.006   | 0.374        | -0.042  | <b>0.001</b> | -0.873  | 0.139  |         |   |         |                       |         |   |                   |  |  |
| <i>ETV6</i>       | NM_001987      | 0.324        | -0.147  | 0.988 | -0.002   | <b>0.025</b> | -0.984  | 0.227        | 0.087   | 0.402        | 0.048   | 0.543        | 0.038   | 0.273        | 0.413   | -0.558 |         |   |         |                       |         |   |                   |  |  |
| <i>SSPN</i>       | NM_005086      | <b>0.005</b> | -0.465  | 0.129 | -0.222   | <b>0.012</b> | -1.367  | <b>0.003</b> | -0.269  | 0.845        | -0.014  | <b>0.001</b> | -0.253  | 0.135        | 0.705   | -0.651 |         |   |         |                       |         |   |                   |  |  |
| <i>RGSI</i>       | NM_002362      | 0.256        | -0.13   | 0.873 | 0.017    | 0.185        | -0.457  | 0.439        | 0.044   | 0.868        | -0.007  | 0.308        | 0.050   | 0.224        | 0.357   | -0.102 |         |   |         |                       |         |   |                   |  |  |
| <i>IL18R1*</i>    | NM_003855*     | <b>0.010</b> | -0.362  | 0.360 | -0.134   | 0.684        | -0.18   | 0.832        | 0.015   | 0.704        | -0.022  | 0.585        | 0.034   | 0.915        | 0.04    | -0.139 |         |   |         |                       |         |   |                   |  |  |
| <i>DSP*</i>       | NM_004415*     | 0.312        | 0.105   | 0.880 | -0.013   | 0.717        | 0.11    | 0.583        | 0.027   | 0.614        | -0.020  | 0.279        | 0.046   | 0.392        | -0.219  | -0.098 |         |   |         |                       |         |   |                   |  |  |
| <i>SETMAR*</i>    | NM_006515*     | 0.526        | 0.037   | 0.740 | -0.016   | 0.115        | 0.275   | 0.927        | 0.003   | 0.798        | -0.006  | 0.739        | 0.008   | 0.563        | -0.086  | 0.188  |         |   |         |                       |         |   |                   |  |  |
| <i>HSD17B8</i>    | NM_014234      | 0.499        | 0.097   | 0.704 | 0.047    | 0.186        | -0.572  | 0.180        | -0.097  | 0.178        | -0.076  | 0.751        | -0.020  | 0.127        | 0.559   | -0.014 |         |   |         |                       |         |   |                   |  |  |
| <i>TNFRSF21</i>   | NM_014452      | 0.065        | -0.284  | 0.756 | -0.04    | 0.137        | -0.703  | 0.618        | 0.039   | <b>0.032</b> | 0.130   | 0.175        | -0.091  | 0.532        | 0.252   | -0.452 |         |   |         |                       |         |   |                   |  |  |

|                 |              |              |        |              |        |              |        |       |        |       |        |       |        |       |        |              |        |
|-----------------|--------------|--------------|--------|--------------|--------|--------------|--------|-------|--------|-------|--------|-------|--------|-------|--------|--------------|--------|
| <b>EPDR1*</b>   | NM_017549*   | 0.094        | -0.221 | 0.895        | -0.016 | <b>0.017</b> | 0.933  | 0.881 | 0.010  | 0.544 | -0.031 | 0.467 | 0.041  | 0.165 | -0.466 | 0.160        | 0.452  |
| <b>DUSP22</b>   | NM_020185    | 0.986        | 0.002  | 0.848        | 0.018  | 0.299        | 0.356  | 0.114 | 0.088  | 0.331 | 0.043  | 0.357 | 0.045  | 0.772 | -0.084 | 0.301        | 0.287  |
| <b>GPRC5D</b>   | NM_018654    | <b>0.008</b> | 0.354  | <b>0.023</b> | 0.311  | <b>0.030</b> | 0.914  | 0.514 | 0.046  | 0.374 | -0.050 | 0.119 | 0.095  | 0.817 | -0.084 | <b>0.014</b> | 0.831  |
| <b>TSGA10IP</b> | NM_152762    | <b>0.006</b> | -0.253 | 0.281        | -0.086 | 0.756        | 0.091  | 0.846 | -0.010 | 0.701 | 0.015  | 0.561 | -0.025 | 0.426 | -0.197 | 0.658        | -0.105 |
| <b>GSTMI</b>    | NM_000561    | 0.498        | 0.107  | 0.754        | 0.039  | 0.387        | -0.415 | 0.950 | -0.005 | 0.728 | 0.022  | 0.691 | -0.027 | 0.978 | 0.011  | 0.288        | -0.414 |
| <b>SERPINB7</b> | NM_001040147 | 0.767        | 0.040  | 0.630        | 0.056  | 0.308        | -0.408 | 0.561 | -0.038 | 0.469 | 0.037  | 0.194 | -0.074 | 0.879 | 0.052  | 0.285        | -0.348 |
| <b>INPPI*</b>   | NM_001128928 | 0.603        | 0.089  | 0.569        | -0.091 | 0.051        | -0.990 | 0.807 | 0.021  | 0.944 | -0.005 | 0.737 | 0.025  | 0.202 | 0.555  | 0.275        | -0.455 |
| <b>CCDC125</b>  | NM_176816    | <b>0.030</b> | 0.082  | 0.745        | -0.011 | 0.260        | 0.133  | 0.321 | 0.019  | 0.237 | 0.018  | 0.971 | 0.001  | 0.249 | -0.116 | 0.820        | 0.022  |
| <b>GOLGA6L4</b> | NM_001267536 | 0.240        | 0.102  | 0.227        | -0.09  | 0.951        | -0.016 | 0.707 | 0.016  | 0.802 | -0.009 | 0.508 | 0.025  | 0.897 | -0.03  | 0.801        | -0.055 |
| <b>G0S2</b>     | NM_015714    | 0.703        | -0.051 | 0.213        | 0.145  | 0.489        | 0.275  | 0.729 | -0.023 | 0.672 | -0.022 | 0.984 | -0.001 | 0.642 | 0.157  | 0.178        | 0.433  |

**Supplementary Table 11** shows top candidate genes/transcripts. Transcripts marked with \* have at least one additional transcript delivering identical results (*MEOX1*; NM\_004527; *PHLDB1*: NM\_001144758; *IL18RI*: NM\_001282399; *DSP*: NM\_001008844; *SETMAR*: NM\_001243723, NM\_001276325; *EPDR1*: NM\_001242946; *INPPI*: NM\_002194). Linear regression analyses were adjusted for sex, age, lnBMI and T2D. Phenotypes were measured as following: BMI: kg/m<sup>2</sup>; body fat: %; CT-ratio: OVAT/SAT area; Waist: cm; HIP: cm; WHR: ratio waist-to-hip; subcutaneous-fat area: cm<sup>2</sup>; visceral fat area: cm<sup>2</sup>. Results are shown as *P*-values (*P*) and effect direction ( $\beta$ ). Nominal significance is defined as *P*<0.05.

Supplementary Table 12. Linear regression analyses for anthropometric traits in OVAT

| Gene ID           | Transcript    | BMI                        |         |       | body fat |              |         | CT-ratio     |         |              | Waist   |              |         | HIP          |         |              | WHR     |   |         | subcutaneous-fat area |         |   | visceral fat area |  |  |
|-------------------|---------------|----------------------------|---------|-------|----------|--------------|---------|--------------|---------|--------------|---------|--------------|---------|--------------|---------|--------------|---------|---|---------|-----------------------|---------|---|-------------------|--|--|
|                   |               | P                          | $\beta$ | P     | $\beta$  | P            | $\beta$ | P            | $\beta$ | P            | $\beta$ | P            | $\beta$ | P            | $\beta$ | P            | $\beta$ | P | $\beta$ | P                     | $\beta$ | P | $\beta$           |  |  |
| <i>HOXC6</i>      | NM_004503     | <b>0.029</b>               | -0.269  | 0.088 | -0.177   | 0.421        | -0.302  | 0.620        | -0.031  | <b>0.021</b> | -0.112  | 0.133        | 0.081   | 0.437        | -0.247  | 0.067        | -0.552  |   |         |                       |         |   |                   |  |  |
| <i>MEOX1*</i>     | NM_013999*    | 0.126                      | -0.257  | 0.514 | -0.103   | 0.053        | 0.951   | 0.959        | 0.004   | 0.375        | -0.058  | 0.389        | 0.062   | <b>0.032</b> | -0.893  | 0.900        | 0.051   |   |         |                       |         |   |                   |  |  |
| <i>PPARG</i>      | NM_005037     | 0.131                      | -0.173  | 0.483 | -0.068   | 0.261        | -0.381  | 0.252        | -0.064  | <b>0.051</b> | -0.085  | 0.673        | 0.020   | 0.988        | -0.004  | 0.174        | -0.373  |   |         |                       |         |   |                   |  |  |
| <i>PPARG (2)</i>  | NM_138711     | 0.199                      | -0.169  | 0.549 | -0.066   | <b>0.029</b> | -0.833  | 0.240        | -0.074  | 0.265        | -0.055  | 0.726        | -0.019  | 0.466        | 0.240   | 0.062        | -0.581  |   |         |                       |         |   |                   |  |  |
| <i>CKMT1B</i>     | NM_020990     | 0.390                      | 0.108   | 0.862 | 0.018    | 0.413        | 0.306   | 0.250        | 0.070   | 0.603        | -0.025  | 0.077        | 0.093   | 0.794        | 0.083   | 0.200        | 0.387   |   |         |                       |         |   |                   |  |  |
| <i>HAND2</i>      | NM_021973     | <b>0.001</b>               | -0.489  | 0.878 | -0.022   | 0.734        | -0.174  | 0.984        | 0.002   | 0.705        | -0.025  | 0.713        | 0.027   | 0.937        | -0.034  | 0.607        | -0.213  |   |         |                       |         |   |                   |  |  |
| <i>TCF21</i>      | NM_198392     | 0.886                      | -0.022  | 0.256 | 0.145    | 0.961        | 0.022   | 0.993        | 0.001   | 0.370        | 0.052   | 0.429        | -0.050  | 0.743        | 0.125   | 0.655        | 0.163   |   |         |                       |         |   |                   |  |  |
| <i>CKMT1A</i>     | NM_001015001  | <b>0.032</b>               | 0.260   | 0.264 | 0.116    | 0.347        | 0.354   | 0.587        | 0.033   | 0.558        | -0.028  | 0.267        | 0.059   | 0.608        | 0.164   | 0.081        | 0.529   |   |         |                       |         |   |                   |  |  |
| <i>AFF3</i>       | NM_001025108  | 0.344                      | 0.156   | 0.841 | 0.029    | 0.543        | 0.294   | 0.993        | -0.001  | 0.264        | -0.069  | 0.313        | 0.069   | 0.608        | -0.211  | 0.801        | 0.099   |   |         |                       |         |   |                   |  |  |
| <i>CD36</i>       | NM_001127443  | 0.055                      | -0.196  | 0.764 | -0.026   | 0.342        | -0.305  | 0.466        | -0.040  | 0.233        | -0.051  | 0.802        | 0.012   | 0.507        | -0.181  | 0.059        | -0.488  |   |         |                       |         |   |                   |  |  |
| <i>FAM25C</i>     | NM_001137548  | 0.637                      | -0.092  | 0.804 | -0.036   | 0.098        | 0.914   | 0.347        | 0.086   | 0.718        | 0.026   | 0.448        | 0.060   | 0.811        | -0.113  | 0.074        | 0.801   |   |         |                       |         |   |                   |  |  |
| <i>PHLDB1*</i>    | NM_001144759* | 0.326                      | -0.150  | 0.368 | 0.125    | 0.627        | 0.216   | 0.378        | 0.064   | 0.362        | -0.052  | 0.060        | 0.117   | 0.634        | -0.180  | 0.962        | 0.017   |   |         |                       |         |   |                   |  |  |
| <i>SORBS2</i>     | NM_001145671  | <b>3.0x10<sup>-4</sup></b> | 0.358   | 0.739 | 0.030    | 0.148        | 0.474   | 0.360        | -0.049  | 0.420        | 0.034   | 0.073        | -0.083  | 0.707        | -0.105  | 0.163        | 0.371   |   |         |                       |         |   |                   |  |  |
| <i>SORBS2 (2)</i> | NM_001145672  | <b>2.4x10<sup>-5</sup></b> | 0.437   | 0.551 | 0.062    | 0.095        | 0.599   | 0.697        | -0.023  | 0.273        | 0.051   | 0.148        | -0.074  | 0.305        | -0.314  | 0.322        | 0.291   |   |         |                       |         |   |                   |  |  |
| <i>CLDN1</i>      | NM_021101     | 0.964                      | 0.007   | 0.738 | -0.045   | 0.699        | 0.178   | 0.838        | -0.015  | 0.402        | 0.050   | 0.327        | -0.064  | 0.107        | -0.622  | 0.222        | -0.453  |   |         |                       |         |   |                   |  |  |
| <i>CASQ2</i>      | NM_001232     | <b>6.2x10<sup>-5</sup></b> | 0.314   | 0.659 | 0.036    | 0.689        | 0.110   | 0.714        | -0.017  | 0.753        | -0.011  | 0.884        | -0.006  | 0.561        | 0.136   | 0.274        | 0.244   |   |         |                       |         |   |                   |  |  |
| <i>ATP6V1B2</i>   | NM_001693     | 0.267                      | -0.143  | 0.207 | -0.126   | 0.208        | -0.479  | 0.795        | -0.016  | 0.865        | 0.008   | 0.661        | -0.024  | 0.988        | -0.005  | 0.110        | -0.491  |   |         |                       |         |   |                   |  |  |
| <i>RUNX1</i>      | NM_001754     | 0.599                      | -0.063  | 0.847 | 0.020    | <b>0.014</b> | 0.843   | <b>0.050</b> | 0.111   | 0.805        | 0.011   | <b>0.044</b> | 0.099   | 0.675        | -0.125  | <b>0.010</b> | 0.721   |   |         |                       |         |   |                   |  |  |
| <i>ETV6</i>       | NM_001987     | 0.132                      | -0.220  | 0.488 | -0.103   | 0.633        | -0.208  | 0.315        | -0.071  | 0.731        | 0.019   | 0.151        | -0.088  | 0.961        | -0.018  | 0.547        | -0.212  |   |         |                       |         |   |                   |  |  |
| <i>SSPN</i>       | NM_005086     | 0.593                      | 0.085   | 0.182 | 0.168    | <b>0.033</b> | -0.993  | 0.228        | -0.097  | 0.960        | -0.003  | 0.180        | -0.094  | <b>0.008</b> | 1.046   | 0.913        | 0.042   |   |         |                       |         |   |                   |  |  |
| <i>RGS1</i>       | NM_002362     | 0.217                      | -0.156  | 0.330 | -0.109   | 0.537        | -0.235  | 0.107        | -0.099  | <b>0.013</b> | -0.118  | 0.723        | 0.019   | 0.889        | -0.045  | 0.348        | -0.289  |   |         |                       |         |   |                   |  |  |
| <i>IL18R1*</i>    | NM_003855*    | 0.833                      | -0.028  | 0.878 | -0.018   | 0.833        | -0.085  | 0.129        | -0.100  | 0.757        | -0.016  | 0.145        | -0.083  | 0.744        | -0.112  | 0.540        | -0.202  |   |         |                       |         |   |                   |  |  |
| <i>DSP*</i>       | NM_004415*    | 0.219                      | -0.146  | 0.229 | -0.126   | 0.602        | -0.194  | 0.609        | -0.031  | 0.932        | -0.004  | 0.621        | -0.026  | 0.387        | -0.272  | 0.109        | -0.479  |   |         |                       |         |   |                   |  |  |
| <i>SETMAR*</i>    | NM_006515*    | <b>0.026</b>               | 0.108   | 0.714 | 0.016    | 0.600        | 0.081   | 0.271        | -0.028  | 0.847        | 0.004   | 0.153        | -0.031  | 0.500        | 0.088   | 0.177        | 0.168   |   |         |                       |         |   |                   |  |  |
| <i>HSD17B8</i>    | NM_014234     | <b>0.036</b>               | -0.301  | 0.677 | 0.048    | 0.647        | -0.202  | 0.078        | -0.125  | 0.216        | -0.070  | 0.376        | -0.055  | 0.802        | 0.094   | 0.749        | -0.114  |   |         |                       |         |   |                   |  |  |
| <i>TNFRSF21</i>   | NM_014452     | <b>0.009</b>               | -0.342  | 0.252 | -0.144   | 0.475        | 0.300   | <b>0.047</b> | -0.139  | <b>0.013</b> | -0.135  | 0.931        | -0.005  | 0.101        | -0.579  | 0.416        | -0.277  |   |         |                       |         |   |                   |  |  |

|                 |              |                            |        |              |        |              |        |       |        |              |        |       |        |              |        |              |        |
|-----------------|--------------|----------------------------|--------|--------------|--------|--------------|--------|-------|--------|--------------|--------|-------|--------|--------------|--------|--------------|--------|
| <i>EPDR1*</i>   | NM_017549*   | 0.738                      | 0.051  | 0.977        | -0.004 | 0.205        | 0.569  | 0.166 | 0.102  | 0.216        | 0.072  | 0.639 | 0.030  | 0.990        | 0.005  | 0.114        | 0.574  |
| <i>DUSP22</i>   | NM_020185    | 0.272                      | 0.108  | 0.767        | 0.024  | 0.507        | 0.200  | 0.710 | 0.019  | 0.942        | 0.003  | 0.722 | 0.015  | 0.697        | -0.100 | 0.673        | 0.104  |
| <i>GPRC5D</i>   | NM_018654    | 0.629                      | 0.061  | 0.703        | -0.040 | 0.256        | 0.459  | 0.974 | 0.002  | 0.305        | 0.054  | 0.374 | -0.052 | 0.416        | -0.280 | 0.591        | 0.177  |
| <i>TSGA10IP</i> | NM_152762    | 0.216                      | -0.135 | 0.210        | -0.131 | 0.139        | -0.485 | 0.565 | 0.031  | 0.730        | 0.015  | 0.701 | 0.018  | 0.476        | 0.200  | 0.291        | -0.282 |
| <i>GSTMI</i>    | NM_000561    | <b>0.037</b>               | -0.420 | <b>0.005</b> | -0.445 | 0.706        | -0.238 | 0.605 | -0.056 | 0.451        | 0.064  | 0.205 | -0.119 | 0.084        | -0.912 | <b>0.025</b> | -1.125 |
| <i>SERPINB7</i> | NM_001040147 | <b>0.018</b>               | -0.361 | 0.514        | -0.082 | 0.455        | -0.368 | 0.751 | 0.026  | 0.238        | -0.075 | 0.162 | 0.098  | 0.240        | 0.489  | 0.734        | 0.136  |
| <i>INPPI*</i>   | NM_001128928 | <b>0.003</b>               | -0.437 | 0.550        | 0.082  | <b>0.026</b> | 1.066  | 0.438 | -0.062 | 0.563        | -0.037 | 0.705 | -0.026 | <b>0.035</b> | -0.858 | 0.595        | 0.210  |
| <i>CCDC125</i>  | NM_176816    | <b>1.3x10<sup>-4</sup></b> | 0.151  | 0.873        | -0.006 | 0.210        | 0.172  | 0.771 | 0.007  | 0.500        | 0.012  | 0.771 | -0.006 | 0.128        | -0.176 | 0.946        | -0.008 |
| <i>GOLGA6L4</i> | NM_001267536 | <b>0.014</b>               | 0.220  | 0.898        | -0.010 | 0.689        | 0.110  | 0.115 | 0.071  | <b>0.038</b> | 0.073  | 0.954 | -0.002 | 0.929        | 0.021  | 0.562        | 0.130  |
| <i>G0S2</i>     | NM_015714    | <b>0.021</b>               | -0.232 | 0.427        | -0.069 | 0.198        | 0.396  | 0.059 | 0.095  | 0.240        | 0.047  | 0.281 | 0.047  | <b>0.016</b> | -0.619 | 0.377        | -0.222 |

**Supplementary Table 12** shows top candidate genes/transcripts. Transcripts marked with \* have at least one additional transcript delivering identical results (*MEOX1*: NM\_004527; *PHLDB1*: NM\_001144758; *IL18R1*: NM\_001282399; *DSP*: NM\_001008844; *SETMAR*: NM\_001243723, NM\_001276325; *EPDR1*: NM\_001242946; *INPPI*: NM\_002194). Linear regression analyses were adjusted for sex, age, lnBMI and T2D. Phenotypes were measured as following: BMI: kg/m<sup>2</sup>; body fat: %; CT-ratio: OVAT/SAT area; Waist: cm; HIP: cm; WHR: ratio waist-to-hip; subcutaneous-fat area: cm<sup>2</sup>; visceral fat area: cm<sup>2</sup>. Results are shown as *P* -values (*P*) and effect direction ( $\beta$ ). Nominal significance is defined as *P*<0.05.

Supplementary Table 13. Linear regression analyses for metabolic variables in SAT

| Gene ID           | SAT Transcript | FPG          |         |              | FPI     |              |         | HbA1c        |         |              | oGTT_2h |       |         | HDL-C        |         |              | LDL-C   |   |         | FFA |         |   | TG      |  |  |
|-------------------|----------------|--------------|---------|--------------|---------|--------------|---------|--------------|---------|--------------|---------|-------|---------|--------------|---------|--------------|---------|---|---------|-----|---------|---|---------|--|--|
|                   |                | P            | $\beta$ | P     | $\beta$ | P            | $\beta$ | P            | $\beta$ | P | $\beta$ | P   | $\beta$ | P | $\beta$ |  |  |
| <i>HOXC6</i>      | NM_004503      | 0.662        | 0.042   | 0.409        | -0.672  | 0.338        | -0.042  | 0.820        | 0.038   | 0.227        | 0.281   | 0.823 | -0.076  | 0.694        | -0.285  | 0.674        | 0.137   |   |         |     |         |   |         |  |  |
| <i>MEOX1*</i>     | NM_013999*     | 0.629        | -0.039  | 0.117        | -1.092  | 0.677        | -0.016  | 0.460        | -0.107  | 0.479        | -0.129  | 0.529 | 0.168   | 0.250        | -0.768  | 0.862        | 0.040   |   |         |     |         |   |         |  |  |
| <i>PPARG</i>      | NM_005037      | 0.866        | -0.013  | 0.967        | -0.028  | 0.821        | 0.008   | 0.656        | -0.057  | 0.671        | 0.074   | 0.840 | -0.051  | 0.914        | -0.060  | 0.754        | -0.071  |   |         |     |         |   |         |  |  |
| <i>PPARG (2)</i>  | NM_138711      | 0.130        | -0.130  | 0.111        | -1.166  | 0.497        | -0.027  | 0.060        | -0.276  | 0.426        | -0.150  | 0.541 | -0.170  | 0.164        | -0.892  | 0.608        | 0.130   |   |         |     |         |   |         |  |  |
| <i>CKMT1B</i>     | NM_020990      | 0.144        | 0.103   | 0.950        | -0.037  | 0.332        | 0.032   | 0.594        | 0.066   | 0.189        | -0.199  | 0.659 | 0.099   | 0.407        | 0.428   | 0.330        | -0.199  |   |         |     |         |   |         |  |  |
| <i>HAND2</i>      | NM_021973      | 0.183        | -0.109  | <b>0.003</b> | -1.999  | 0.054        | -0.072  | 0.332        | -0.136  | 0.218        | 0.218   | 0.959 | 0.013   | <b>0.011</b> | -1.564  | 0.348        | -0.223  |   |         |     |         |   |         |  |  |
| <i>TCF21</i>      | NM_198392      | 0.699        | 0.034   | 0.299        | 0.789   | 0.098        | -0.067  | 0.111        | -0.231  | 0.396        | -0.182  | 0.523 | 0.202   | 0.435        | -0.555  | <b>0.037</b> | -0.601  |   |         |     |         |   |         |  |  |
| <i>CKMT1A</i>     | NM_001015001   | 0.510        | 0.039   | 0.122        | 0.771   | 0.930        | 0.002   | 0.584        | 0.059   | 0.488        | -0.091  | 0.967 | 0.008   | 0.157        | 0.645   | 0.618        | 0.093   |   |         |     |         |   |         |  |  |
| <i>AFF3</i>       | NM_001025108   | 0.159        | 0.118   | 0.776        | -0.203  | 0.484        | 0.027   | 0.450        | 0.124   | <b>0.033</b> | -0.419  | 0.829 | 0.064   | 0.686        | -0.261  | <b>0.029</b> | 0.565   |   |         |     |         |   |         |  |  |
| <i>CD36</i>       | NM_001127443   | 0.603        | -0.031  | 0.047        | -0.989  | 0.264        | -0.030  | 0.113        | -0.170  | 0.358        | 0.113   | 0.758 | -0.055  | 0.172        | -0.602  | 0.941        | 0.012   |   |         |     |         |   |         |  |  |
| <i>FAM25C</i>     | NM_001137548   | 0.989        | -0.001  | 0.661        | 0.325   | 0.448        | 0.032   | 0.717        | -0.059  | 0.591        | -0.122  | 0.728 | -0.114  | 0.524        | -0.423  | 0.286        | 0.318   |   |         |     |         |   |         |  |  |
| <i>PHLDB1*</i>    | NM_001144759*  | 0.105        | -0.149  | 0.462        | -0.569  | 0.970        | 0.002   | 0.956        | 0.008   | 0.488        | 0.138   | 0.552 | -0.174  | 0.711        | -0.266  | 0.364        | -0.254  |   |         |     |         |   |         |  |  |
| <i>SORBS2</i>     | NM_001145671   | 0.582        | 0.031   | 0.749        | 0.159   | 0.390        | -0.023  | 0.584        | 0.055   | 0.823        | 0.030   | 0.509 | 0.129   | 0.804        | 0.122   | 0.293        | -0.192  |   |         |     |         |   |         |  |  |
| <i>SORBS2 (2)</i> | NM_001145672   | 0.424        | 0.045   | 0.363        | 0.447   | 0.775        | -0.007  | 0.830        | 0.021   | 0.780        | -0.035  | 0.448 | 0.138   | 0.465        | 0.358   | 0.753        | -0.053  |   |         |     |         |   |         |  |  |
| <i>CLDN1</i>      | NM_021101      | 0.638        | -0.039  | <b>0.029</b> | -1.467  | 0.622        | 0.019   | 0.601        | 0.077   | 0.806        | 0.046   | 0.534 | -0.169  | 0.430        | -0.479  | 0.564        | -0.136  |   |         |     |         |   |         |  |  |
| <i>CASQ2</i>      | NM_001232      | 0.796        | -0.015  | <b>0.002</b> | 1.521   | 0.838        | -0.005  | 0.933        | 0.008   | 0.882        | 0.019   | 0.565 | 0.107   | 0.420        | 0.391   | 0.226        | -0.210  |   |         |     |         |   |         |  |  |
| <i>ATP6V1B2</i>   | NM_001693      | 0.298        | -0.074  | 0.716        | -0.215  | 0.273        | -0.036  | 0.914        | 0.012   | 0.159        | 0.208   | 0.073 | 0.385   | 0.994        | -0.004  | 0.190        | -0.270  |   |         |     |         |   |         |  |  |
| <i>RUNX1</i>      | NM_001754      | 0.095        | 0.107   | 0.959        | -0.028  | 0.945        | 0.002   | 0.376        | -0.096  | 0.537        | -0.084  | 0.183 | -0.266  | 0.759        | -0.153  | 0.664        | 0.080   |   |         |     |         |   |         |  |  |
| <i>ETV6</i>       | NM_001987      | 0.364        | -0.078  | <b>0.049</b> | -1.423  | 0.779        | -0.011  | 0.256        | -0.168  | <b>0.041</b> | 0.350   | 0.916 | 0.027   | 0.858        | 0.116   | 0.830        | -0.049  |   |         |     |         |   |         |  |  |
| <i>SSPN</i>       | NM_005086      | 0.489        | -0.071  | <b>0.001</b> | -2.812  | <b>0.029</b> | -0.105  | <b>0.003</b> | -0.505  | 0.230        | 0.277   | 0.075 | -0.596  | 0.505        | -0.538  | 0.564        | 0.189   |   |         |     |         |   |         |  |  |
| <i>RGS1</i>       | NM_002362      | 0.391        | -0.057  | 0.152        | -0.775  | 0.673        | -0.013  | 0.617        | -0.054  | 0.087        | 0.233   | 0.163 | 0.279   | 0.194        | -0.613  | 0.928        | 0.016   |   |         |     |         |   |         |  |  |
| <i>IL18R1*</i>    | NM_003855*     | 0.989        | 0.001   | 0.324        | -0.678  | 0.086        | -0.066  | 0.899        | 0.017   | 0.308        | 0.178   | 0.428 | 0.200   | 0.516        | -0.353  | 0.975        | 0.007   |   |         |     |         |   |         |  |  |
| <i>DSP*</i>       | NM_004415*     | 0.165        | 0.083   | 0.837        | -0.099  | 0.476        | -0.020  | 0.821        | -0.023  | 0.659        | 0.064   | 0.317 | 0.202   | 0.097        | -0.692  | 0.478        | -0.130  |   |         |     |         |   |         |  |  |
| <i>SETMAR*</i>    | NM_006515*     | 0.829        | -0.007  | 0.178        | 0.366   | 0.775        | -0.004  | 0.948        | 0.004   | 0.714        | -0.027  | 0.420 | 0.086   | 0.862        | 0.047   | 0.470        | 0.070   |   |         |     |         |   |         |  |  |
| <i>HSD17B8</i>    | NM_014234      | <b>0.044</b> | -0.162  | 0.738        | 0.259   | 0.669        | 0.016   | 0.672        | 0.075   | 0.242        | 0.223   | 0.614 | -0.142  | 0.806        | 0.157   | 0.991        | 0.003   |   |         |     |         |   |         |  |  |
| <i>TNFRSF21</i>   | NM_014452      | 0.175        | -0.122  | 0.267        | -0.904  | 0.117        | -0.066  | 0.112        | -0.288  | 0.907        | 0.022   | 0.506 | 0.181   | 0.087        | -1.120  | 0.701        | 0.091   |   |         |     |         |   |         |  |  |



|                 |              |       |        |       |        |       |        |       |        |       |        |       |        |              |        |       |        |
|-----------------|--------------|-------|--------|-------|--------|-------|--------|-------|--------|-------|--------|-------|--------|--------------|--------|-------|--------|
| <b>EPDR1*</b>   | NM_017549*   | 0.791 | 0.020  | 0.705 | -0.251 | 0.647 | -0.016 | 0.956 | 0.007  | 0.208 | -0.244 | 0.433 | -0.223 | 0.862        | -0.122 | 0.899 | -0.031 |
| <b>DUSP22</b>   | NM_020185    | 0.993 | -0.001 | 0.116 | 0.835  | 0.499 | 0.020  | 0.621 | -0.054 | 0.281 | -0.154 | 0.808 | -0.051 | 0.225        | 0.582  | 0.487 | 0.143  |
| <b>GPRC5D</b>   | NM_018654    | 0.171 | 0.112  | 0.155 | 0.962  | 0.334 | 0.037  | 0.055 | 0.246  | 0.055 | -0.318 | 0.921 | -0.024 | <b>0.005</b> | 1.699  | 0.555 | 0.130  |
| <b>TSGA10IP</b> | NM_152762    | 0.333 | -0.054 | 0.229 | -0.621 | 0.152 | -0.037 | 0.054 | -0.187 | 0.571 | -0.074 | 0.876 | 0.030  | 0.831        | -0.091 | 0.681 | 0.066  |
| <b>GSTMI</b>    | NM_000561    | 0.369 | -0.081 | 0.178 | -1.090 | 0.584 | 0.023  | 0.834 | 0.036  | 0.376 | -0.194 | 0.481 | -0.224 | 0.956        | -0.036 | 0.941 | 0.023  |
| <b>SERPINB7</b> | NM_001040147 | 0.148 | -0.109 | 0.653 | -0.295 | 0.144 | -0.052 | 0.020 | -0.285 | 0.954 | 0.011  | 0.130 | 0.425  | 0.349        | 0.587  | 0.737 | -0.083 |
| <b>INPPI*</b>   | NM_001128928 | 0.427 | 0.078  | 0.652 | -0.368 | 0.252 | 0.052  | 0.996 | -0.001 | 0.264 | 0.236  | 0.119 | -0.478 | 0.984        | -0.014 | 0.907 | 0.031  |
| <b>CCDC125</b>  | NM_176816    | 0.930 | 0.002  | 0.203 | 0.233  | 0.165 | -0.014 | 0.264 | 0.040  | 0.850 | 0.010  | 0.176 | 0.107  | 0.237        | -0.201 | 0.136 | -0.103 |
| <b>GOLGA6L4</b> | NM_001267536 | 0.722 | 0.018  | 0.102 | 0.648  | 0.516 | -0.015 | 0.769 | 0.029  | 0.838 | 0.022  | 0.395 | -0.136 | 0.358        | -0.362 | 0.455 | -0.113 |
| <b>G0S2</b>     | NM_015714    | 0.822 | 0.017  | 0.231 | -0.766 | 0.327 | 0.034  | 0.659 | 0.061  | 0.385 | -0.153 | 0.345 | -0.244 | 0.587        | -0.408 | 0.587 | 0.126  |

**Supplementary Table 13** shows top candidate genes/transcripts. Transcripts marked with \* have at least one additional transcript delivering identical results (*MEOX1*: NM\_004527; *PHLDB1*: NM\_001144758; *IL18RI*: NM\_001282399; *DSP*: NM\_001008844; *SETMAR*: NM\_001243723, NM\_001276325; *EPDR1*: NM\_001242946; *INPPI*: NM\_002194). Linear regression analyses were adjusted for sex, age, lnBMI and T2D. Phenotypes were measured as following: FPG: mmol/L; FPI: pmol/L; HbA1c: %; oGTT\_2h: mmol/L; HDL-C: mmol/L; LDL-C: mmol/L; FFA: mmol/L; TG: mmol/L. Results are shown as *P*-values (*P*) and effect direction ( $\beta$ ). Nominal significance is defined as  $P < 0.05$ .

Supplementary Table 14. Linear regression analyses for metabolic variables in OVAT

| Gene ID           | Transcript    | FPG          |         |       | FPI     |              |         | HbA1c        |         |       | oGTT_2h |              |         | HDL-C        |              |        | LDL-C   |        |         | FFA |         |   | TG      |  |  |
|-------------------|---------------|--------------|---------|-------|---------|--------------|---------|--------------|---------|-------|---------|--------------|---------|--------------|--------------|--------|---------|--------|---------|-----|---------|---|---------|--|--|
|                   |               | P            | $\beta$ | P     | $\beta$ | P            | $\beta$ | P            | $\beta$ | P     | $\beta$ | P            | $\beta$ | P            | $\beta$      | P      | $\beta$ | P      | $\beta$ | P   | $\beta$ | P | $\beta$ |  |  |
| <i>HGX6</i>       | NM_004503     | 0.217        | -0.090  | 0.443 | -0.469  | <b>0.009</b> | -0.086  | 0.903        | 0.018   | 0.758 | 0.059   | -0.129       | 0.645   | -0.129       | 0.396        | -0.533 | 0.134   | -0.377 |         |     |         |   |         |  |  |
| <i>MEOX1*</i>     | NM_013999*    | 0.937        | 0.008   | 0.439 | 0.623   | 0.495        | -0.030  | 0.221        | 0.193   | 0.841 | 0.044   | -0.136       | 0.668   | -0.136       | 0.450        | 0.513  | 0.059   | -0.535 |         |     |         |   |         |  |  |
| <i>PPARG</i>      | NM_005037     | 0.462        | -0.049  | 0.947 | -0.038  | 0.284        | -0.033  | 0.308        | -0.116  | 0.751 | -0.053  | 0.082        | 0.740   | 0.082        | 0.690        | -0.217 | 0.250   | 0.244  |         |     |         |   |         |  |  |
| <i>PPARG (2)</i>  | NM_138711     | 0.260        | -0.085  | 0.633 | -0.313  | 0.102        | -0.057  | <b>0.050</b> | -0.304  | 0.872 | -0.034  | -0.262       | 0.393   | -0.262       | 0.176        | -0.955 | 0.482   | 0.193  |         |     |         |   |         |  |  |
| <i>CKMT1B</i>     | NM_020990     | 0.141        | 0.105   | 0.511 | 0.392   | 0.866        | 0.006   | 0.069        | 0.235   | 0.477 | -0.108  | 0.174        | 0.433   | 0.174        | 0.122        | 0.766  | 0.471   | 0.143  |         |     |         |   |         |  |  |
| <i>HAND2</i>      | NM_021973     | <b>0.008</b> | -0.251  | 0.691 | -0.322  | <b>0.016</b> | -0.106  | 0.577        | 0.094   | 0.691 | -0.079  | 0.242        | 0.410   | 0.242        | 0.619        | -0.365 | 0.493   | -0.189 |         |     |         |   |         |  |  |
| <i>TCF21</i>      | NM_198392     | 0.088        | -0.145  | 0.305 | 0.722   | 0.205        | -0.051  | 0.521        | -0.091  | 0.935 | 0.016   | 0.278        | 0.335   | 0.278        | 0.856        | 0.114  | 0.313   | -0.276 |         |     |         |   |         |  |  |
| <i>CKMT1A</i>     | NM_001015001  | <b>0.042</b> | 0.145   | 0.386 | 0.527   | 0.445        | 0.026   | 0.326        | 0.116   | 0.889 | -0.021  | <b>0.027</b> | 0.483   | 0.483        | <b>0.040</b> | 1.009  | 0.174   | 0.270  |         |     |         |   |         |  |  |
| <i>AFF3</i>       | NM_001025108  | <b>0.051</b> | 0.183   | 0.621 | 0.407   | 0.426        | -0.035  | 0.929        | 0.015   | 0.574 | 0.116   | -0.146       | 0.619   | -0.146       | 0.211        | -0.883 | 0.265   | 0.271  |         |     |         |   |         |  |  |
| <i>CD36</i>       | NM_001127443  | 0.126        | -0.092  | 0.391 | -0.430  | 0.190        | -0.037  | 0.913        | -0.011  | 0.141 | -0.210  | 0.838        | -0.043  | 0.825        | 0.114        | 0.456  | 0.148   |        |         |     |         |   |         |  |  |
| <i>FAM25C</i>     | NM_001137548  | 0.905        | -0.013  | 0.365 | 0.807   | 0.414        | 0.042   | 0.172        | 0.224   | 0.632 | 0.110   | 0.274        | 0.419   | 0.326        | 0.724        | 0.616  | -0.162  |        |         |     |         |   |         |  |  |
| <i>PHLDB1*</i>    | NM_001144759* | 0.732        | -0.030  | 0.797 | 0.194   | 0.874        | -0.006  | 0.079        | 0.264   | 0.631 | 0.092   | 0.450        | 0.450   | 0.211        | 0.350        | 0.682  | 0.390   | -0.217 |         |     |         |   |         |  |  |
| <i>SORBS2</i>     | NM_001145671  | 0.172        | 0.088   | 0.148 | 0.766   | 0.112        | 0.046   | 0.393        | -0.093  | 0.399 | -0.126  | 0.985        | -0.004  | 0.295        | 0.488        | 0.696  | 0.087   |        |         |     |         |   |         |  |  |
| <i>SORBS2 (2)</i> | NM_001145672  | 0.559        | 0.042   | 0.135 | 0.863   | 0.169        | 0.044   | 0.394        | -0.098  | 0.698 | -0.063  | 0.439        | 0.183   | 0.129        | 0.782        | 0.526  | 0.158   |        |         |     |         |   |         |  |  |
| <i>CLDN1</i>      | NM_021101     | 0.957        | -0.005  | 0.543 | 0.430   | 0.479        | -0.029  | 0.899        | -0.019  | 0.498 | -0.134  | 0.809        | -0.069  | 0.662        | -0.286       | 0.402  | -0.199  |        |         |     |         |   |         |  |  |
| <i>CASQ2</i>      | NM_001232     | 0.522        | 0.034   | 0.850 | 0.082   | 0.079        | 0.042   | 0.566        | -0.054  | 0.489 | -0.085  | 0.922        | -0.018  | 0.965        | -0.019       | 0.464  | 0.112   |        |         |     |         |   |         |  |  |
| <i>ATP6V1B2</i>   | NM_001693     | 0.884        | 0.011   | 0.500 | -0.420  | 0.451        | -0.026  | 0.546        | -0.076  | 0.210 | -0.206  | 0.468        | -0.175  | 0.158        | -0.757       | 0.577  | 0.125   |        |         |     |         |   |         |  |  |
| <i>RUNX1</i>      | NM_001754     | 0.275        | -0.075  | 0.394 | 0.502   | 0.099        | 0.053   | 0.928        | -0.011  | 0.087 | -0.259  | <b>0.049</b> | 0.437   | 0.836        | -0.118       | 0.160  | 0.273   |        |         |     |         |   |         |  |  |
| <i>ETV6</i>       | NM_001987     | 0.324        | -0.084  | 0.253 | -0.799  | 0.585        | -0.022  | 0.390        | -0.112  | 0.420 | -0.146  | 0.163        | -0.368  | 0.638        | -0.293       | 0.226  | 0.265   |        |         |     |         |   |         |  |  |
| <i>SSPN</i>       | NM_005086     | 0.582        | -0.050  | 0.175 | 1.010   | 0.710        | -0.016  | 0.198        | -0.210  | 0.367 | -0.233  | 0.850        | 0.072   | <b>0.001</b> | -2.067       | 0.611  | -0.165  |        |         |     |         |   |         |  |  |
| <i>RGS1</i>       | NM_002362     | 0.213        | -0.091  | 0.996 | -0.003  | <b>0.005</b> | -0.091  | 0.073        | 0.259   | 0.563 | 0.096   | 0.794        | -0.064  | 0.441        | -0.468       | 0.090  | -0.359  |        |         |     |         |   |         |  |  |
| <i>IL18R1*</i>    | NM_003855*    | 0.454        | -0.057  | 0.887 | -0.102  | 0.064        | -0.064  | 0.248        | -0.161  | 0.724 | -0.060  | 0.143        | -0.360  | 0.210        | -0.778       | 0.265  | 0.229   |        |         |     |         |   |         |  |  |
| <i>DSP*</i>       | NM_004415*    | 0.421        | 0.055   | 0.180 | -0.803  | 0.529        | -0.020  | 0.313        | -0.125  | 0.693 | -0.057  | 0.076        | -0.368  | 0.057        | -1.066       | 0.480  | 0.146   |        |         |     |         |   |         |  |  |
| <i>SETMAR*</i>    | NM_006515*    | 0.622        | 0.014   | 0.649 | 0.111   | 0.450        | 0.010   | 0.252        | -0.062  | 0.242 | -0.080  | 0.393        | -0.086  | 0.683        | -0.094       | 0.402  | 0.073   |        |         |     |         |   |         |  |  |
| <i>HSD17B8</i>    | NM_014234     | 0.866        | -0.014  | 0.939 | 0.056   | 0.965        | 0.002   | 0.882        | 0.023   | 0.358 | 0.196   | 0.138        | -0.462  | 0.701        | 0.246        | 0.369  | 0.244   |        |         |     |         |   |         |  |  |
| <i>TNFRSF21</i>   | NM_014452     | 0.305        | -0.082  | 0.838 | -0.137  | 0.511        | -0.024  | 0.643        | -0.062  | 0.960 | 0.010   | 0.802        | -0.072  | 0.409        | -0.516       | 0.278  | -0.280  |        |         |     |         |   |         |  |  |

|                 |              |       |        |              |        |       |        |              |        |       |        |       |        |       |        |       |        |
|-----------------|--------------|-------|--------|--------------|--------|-------|--------|--------------|--------|-------|--------|-------|--------|-------|--------|-------|--------|
| <b>EPDR1*</b>   | NM_017549*   | 0.311 | 0.088  | 0.779        | -0.207 | 0.665 | 0.017  | 0.085        | 0.245  | 0.596 | 0.099  | 0.748 | -0.087 | 0.250 | 0.740  | 0.612 | 0.121  |
| <b>DUSP22</b>   | NM_020185    | 0.679 | 0.023  | 0.685        | 0.197  | 0.070 | 0.046  | 0.649        | -0.042 | 0.071 | -0.232 | 0.402 | -0.157 | 0.693 | 0.181  | 0.145 | 0.248  |
| <b>GPRC5D</b>   | NM_018654    | 0.085 | 0.123  | 0.554        | -0.370 | 0.490 | 0.023  | 0.263        | -0.138 | 0.888 | 0.021  | 0.327 | -0.218 | 0.434 | 0.456  | 0.628 | 0.100  |
| <b>TSGA10IP</b> | NM_152762    | 0.881 | -0.009 | 0.333        | -0.494 | 0.962 | 0.001  | 0.650        | -0.047 | 0.682 | 0.056  | 0.097 | -0.330 | 0.564 | 0.294  | 0.626 | -0.087 |
| <b>GSTMI</b>    | NM_000561    | 0.114 | -0.188 | <b>0.037</b> | -2.084 | 0.110 | -0.087 | 0.268        | -0.227 | 0.552 | 0.163  | 0.397 | -0.339 | 0.466 | 0.659  | 0.807 | -0.089 |
| <b>SERPINB7</b> | NM_001040147 | 0.326 | 0.090  | 0.381        | -0.661 | 0.311 | -0.043 | 0.186        | 0.192  | 0.836 | 0.039  | 0.485 | 0.191  | 0.492 | -0.440 | 0.616 | -0.117 |
| <b>INPPI*</b>   | NM_001128928 | 0.416 | -0.075 | 0.952        | 0.045  | 0.276 | -0.047 | 0.741        | -0.052 | 0.743 | -0.067 | 0.876 | 0.047  | 0.970 | 0.025  | 0.668 | 0.115  |
| <b>CCDC125</b>  | NM_176816    | 0.710 | 0.010  | 0.311        | 0.228  | 0.396 | 0.010  | <b>0.011</b> | 0.128  | 0.546 | -0.034 | 0.315 | 0.081  | 0.659 | -0.086 | 0.060 | -0.135 |
| <b>GOLGA6L4</b> | NM_001267536 | 0.122 | 0.083  | 0.926        | 0.042  | 0.083 | 0.042  | 0.224        | 0.108  | 0.975 | 0.004  | 0.437 | 0.137  | 0.224 | 0.452  | 0.386 | 0.165  |
| <b>G0S2</b>     | NM_015714    | 0.122 | 0.093  | 0.812        | -0.120 | 0.916 | -0.003 | 0.440        | 0.083  | 0.856 | 0.023  | 0.558 | 0.106  | 0.768 | 0.120  | 0.804 | 0.039  |

**Supplementary Table 14** shows top candidate genes/transcripts. Transcripts marked with \* have at least one additional transcript delivering identical results (*MEOX1*: NM\_004527; *PHLDB1*: NM\_001144758; *IL18RI*: NM\_001282399; *DSP*: NM\_001008844; *SETMAR*: NM\_001243723, NM\_001276325; *EPDR1*: NM\_001242946; *INPPI*: NM\_002194). Linear regression analyses were adjusted for sex, age, lnBMI and T2D. Phenotypes were measured as following: FPG: mmol/L; FPI: pmol/L; HbA1c: %; oGTT\_2h: mmol/L; HDL-C: mmol/L; LDL-C: mmol/L; FFA: mmol/L; TG: mmol/L. Results are shown as *P* –values (*P*) and effect direction ( $\beta$ ). Nominal significance is defined as *P*<0.05.

**Supplementary Table 15 Differential methylation of known GWAS hits for BMI**

| Gene          | SAT vs. OVAT |          | non-obese vs. obese |         | additional GWAS | Association                          | BMI related SNP ( <i>Locke et al.</i> ) | Distance to Promoter (bp)<br>(2000 bp < TSS < 200bp) |
|---------------|--------------|----------|---------------------|---------|-----------------|--------------------------------------|-----------------------------------------|------------------------------------------------------|
|               | in non-obese | in obese | in SAT              | in OVAT |                 |                                      |                                         |                                                      |
| <i>ELAVL4</i> | x            | x        | x                   | x       | PMID: 23251661  | childhood obesity                    | rs11583200                              | -12812                                               |
| <i>TFAP2B</i> | x            | x        | x                   | x       | PMID: 19557161  | Adiposity, Metabolic syndrome        | rs2207139                               | +58849                                               |
| <i>LINGO2</i> | x            | x        | x                   | x       | PMID: 23563607  | Obesity                              | rs10968576                              | -304777                                              |
| <i>CALCR</i>  | x            | x        | x                   | x       | PMID: 23202124  | Birth weight                         | rs9641123                               | +6597                                                |
| <i>BDNF</i>   | x            | x        | x                   | x       | PMID: 19079260  | BMI, weight                          | rs11030104                              | +1327 (NM_001143816)                                 |
| <i>UBE2E3</i> | x            | x        | x                   | x       | PMID: 21552555  | Obesity                              | rs1528435                               | -292536 (NM_006357)                                  |
| <i>NLRC3</i>  | x            |          |                     |         |                 |                                      | rs758747                                | within the promoter                                  |
| <i>SMG6</i>   | x            | x        | x                   | x       | PMID: 19584346  | Coronary artery disease              | rs9914578                               | -164184                                              |
| <i>LRP1B</i>  | x            | x        | x                   | x       | PMID: 25189868  | Blood pressure (smoking interaction) | rs2121279                               | +152014                                              |
| <i>EHBPI</i>  | x            | x        | x                   | x       | PMID: 24097068  | LDL-Cholesterol                      | rs11688816                              | +118824                                              |
| <i>TCF7L2</i> | x            | x        | x                   | x       | PMID: 21873549  | Proinsulin levels                    | rs7903146                               | +48155                                               |
| <i>MC4R</i>   | x            | x        | x                   | x       | PMID: 18454148  | BMI                                  | rs6567160                               | -210698                                              |
| <i>GNAI2</i>  | x            | x        | x                   | x       | PMID: 23563607  | Obesity                              | rs17024393                              | -845                                                 |
| <i>POC5</i>   | x            | x        | x                   | x       | PMID: 23563607  | Obesity                              | rs2112347                               | +4958                                                |
| <i>CREB1</i>  | x            | x        | x                   | x       | PMID: 24962563  | Food antigen IgG levels              | rs17203016                              | -137119                                              |
| <i>ERBB4</i>  | x            | x        | x                   | x       | PMID: 25133637  | Body mass index (change over time)   | rs7599312                               | +7875                                                |
| <i>MTCH2</i>  | x            | x        | x                   | x       | PMID: 20935630  | BMI                                  | rs3817334                               | -13020                                               |
| <i>GRDI</i>   | x            | x        | x                   | x       | PMID: 19584346  | Cardiac structure and function       | rs7899106                               | -705141                                              |
| <i>CBLN1</i>  | x            | x        | x                   | x       |                 |                                      | rs2080454                               | -252968                                              |
| <i>FUBP1</i>  | x            | x        | x                   | x       |                 |                                      | rs12401738                              | within the promoter                                  |
| <i>DMXL2</i>  | x            | x        | x                   | x       | PMID: 20159242  | Asthma                               | rs3736485                               | -166177                                              |
| <i>SEC16B</i> | x            | x        | x                   | x       | PMID: 23669352  | BMI                                  | rs543874                                | -49375                                               |
| <i>SCARB2</i> | x            | x        | x                   | x       |                 |                                      | rs17001654                              | -5310                                                |
| <i>FOXO3</i>  | x            | x        | x                   | x       | PMID: 23251661  | Obesity related traits               | rs9400239                               | +96421                                               |

|                             |    |                |                                |            |        |
|-----------------------------|----|----------------|--------------------------------|------------|--------|
| <i>RALYL</i>                | x  | PMID: 20445134 | Heart failure                  | rs2033732  | -15417 |
| <i>HIF1AN</i>               | x  | PMID: 23362303 | Palmitoleic acid plasma levels | rs17094222 | +99587 |
| Diff. methyl. GWAS Hits (N) | 10 | 6              | 11                             | 13         |        |

**Supplementary Table 15** summarizes known GWAS hits for BMI (Locke et al., 2015) which are differentially methylated between SAT vs. OVAT and non-obese vs. obese analyses. Additional GWAS studies showing associations were extracted from GWAS catalogue (Welter et al., 2014). Distances between the GWAS SNPs (Locke et al.) and the analyzed promoter region were calculated using HG 19 in the Wash U Epigenome Browser (<http://epigenomegateway.wustl.edu>). In the case of multiple available transcripts we choose the closest and indicate the NM-number in brackets.

Supplementary Table 16 Differential methylation of known GWAS hits for fat distribution

| Gene ID        | SAT vs. OVAT |          | non-obese vs. obese |         | additional GWAS | Association                                           | WHR related SNP<br>( <i>Shungin et al.</i> ) | Distance to Promoter<br>(2000 bp < TSS<br>> 200bp) |
|----------------|--------------|----------|---------------------|---------|-----------------|-------------------------------------------------------|----------------------------------------------|----------------------------------------------------|
|                | in non-obese | in obese | in SAT              | in OVAT |                 |                                                       |                                              |                                                    |
| <i>GPC6</i>    | x            |          | x                   |         | PMID: 22044751  | Renal sinus fat                                       | rs319564                                     | -44232                                             |
| <i>SSPN</i>    | x            |          | x                   |         | PMID: 20935629  | Waist-hip ratio                                       | rs10842707                                   | +122659 (NM_005086)                                |
| <i>HOXC12</i>  | x            |          | x                   |         | PMID: 20935629  | Waist-hip ratio                                       | rs10783615                                   | +861                                               |
| <i>HOXA11</i>  | x            |          |                     |         | PMID: 23128233  | Ulcerative colitis                                    | rs7801581                                    | -884                                               |
| <i>GMDS</i>    | x            | x        |                     |         | PMID: 23251661  | Obesity-related traits                                | rs722585                                     | -400332                                            |
| <i>PTPDC1</i>  | x            | x        |                     |         | PMID: 20881960  | Height                                                | rs2398893                                    | -86392                                             |
| <i>NLRP3</i>   | x            |          |                     |         | PMID: 21300955  | C-reactive protein levels                             | rs10925060                                   | +69587                                             |
| <i>TBX15</i>   | x            |          |                     |         | PMID: 20935629  | Waist-hip ratio                                       | rs2645294                                    | +40431                                             |
| <i>GDF5</i>    | x            |          | x                   |         | PMID: 20189936  | Height                                                | rs224333                                     | -1874                                              |
| <i>PPARG</i>   | x            | x        |                     |         | PMID: 22581228  | Fasting insulin-related traits (interaction with BMI) | rs17819328                                   | +159778                                            |
| <i>KLF13</i>   | x            |          |                     | x       |                 |                                                       | rs8042543                                    | +88984                                             |
| <i>HOXC6</i>   | x            | x        |                     | x       | PMID: 22504420  | Bone mineral density                                  | rs2071449 (HOXC4-HOXC6)                      | +5616                                              |
| <i>SPAG17</i>  |              | x        |                     |         | PMID: 25429064  | Height                                                | rs12731372                                   | +123796                                            |
| <i>KCNJ2</i>   |              | x        |                     |         | PMID: 22342860  | Cardiac repolarization                                | rs8066985                                    | +287478                                            |
| <i>BTNL2</i>   |              | x        |                     | x       |                 |                                                       | rs7759742                                    | +4816                                              |
| <i>CPEB4</i>   |              | x        |                     | x       | PMID: 23251661  | Obesity-related traits                                | rs7705502                                    | +5291                                              |
| <i>DCST2</i>   |              | x        |                     |         | PMID: 25281659  | Infant length                                         | rs905938                                     | -14670                                             |
| <i>PIGC</i>    |              |          | x                   | x       | PMID: 20935629  | Waist-hip ratio                                       | rs714515                                     | -60058                                             |
| <i>CCDC92</i>  |              |          | x                   |         | PMID: 20686565  | Triglycerides; HDL cholesterol                        | rs4765219                                    | -16926                                             |
| <i>ADAMTS9</i> |              |          | x                   |         | PMID: 20935629  | Waist-hip ratio                                       | rs2371767                                    | +42913                                             |
| <i>MAP3K1</i>  |              |          | x                   | x       | PMID: 23209189  | Type 2 diabetes                                       | rs9687846                                    | -247010                                            |
| <i>CEBPA</i>   |              |          | x                   | x       | PMID: 23128233  | Inflammatory bowel disease                            | rs4081724                                    | +29517                                             |
| <i>FGFR4</i>   |              |          | x                   |         | PMID: 22703881  | Height                                                | rs6556301                                    | +10825                                             |
| <i>WARS2</i>   |              |          | x                   | x       | PMID: 20935629  | Waist-hip ratio                                       | rs2645294                                    | -110733                                            |

|                             |    |   |   |    |
|-----------------------------|----|---|---|----|
| Diff. methyl. GWAS Hits (N) | 12 | 9 | 8 | 10 |
|-----------------------------|----|---|---|----|

---

**Supplementary Table 16** summarizes known GWAS hits for WHR (Shungin et al., 2015) which are differentially methylated between SAT vs. OVAT and non-obese vs. obese analyses. Additional GWAS studies showing associations were extracted from GWAS catalogue (Welter et al., 2014). Distances between the GWAS SNPs (Locke et al.) and the analyzed promoter region were calculated using HG 19 in the Wash U Epigenome Browser (<http://epigenomegateway.wustl.edu>). In the case of multiple available transcripts we choose the closest and indicate the NM-number in brackets.

**Supplementary Table 17. Differential methylation of imprinted genes**

| Imprinted Genes | SAT vs. OVAT |                      | non-obese vs. obese |          | Status | POI |                  |                   |
|-----------------|--------------|----------------------|---------------------|----------|--------|-----|------------------|-------------------|
|                 | ID           | chromosomal position | in non-obese        | in obese |        |     | in SAT           | in OVAT           |
| <i>NDN</i>      | 15q11.2-q12  | x                    |                     |          | x      | x   | Imprinted        | Paternal          |
| <i>HOXA11</i>   | 7p15-p14     | x                    |                     |          |        |     | Predicted        | Maternal          |
| <i>MAGEL2</i>   | 15q11-q12    | x                    |                     |          |        | x   | Imprinted        | Paternal          |
| <i>NPAP1</i>    | 15q11-q13    | x                    |                     |          | x      | x   | Imprinted        | Unknown           |
| <i>MKRN3</i>    | 15q11-q13    | x                    |                     |          |        | x   | Imprinted        | Paternal          |
| <i>HOXA2</i>    | 7p15-p14     | x                    |                     |          | x      | x   | Predicted        | Maternal          |
| <i>LILRB4</i>   | 19q13.4      | x                    |                     |          |        | x   | Predicted        | Maternal          |
| <i>SLC38A4</i>  | 12q13        | x                    | x                   |          |        |     | Unknown          | Unknown           |
| <i>CDH18</i>    | 5p15.2-p15.1 | x                    | x                   |          |        | x   | Predicted        | Paternal          |
| <i>PRIM2</i>    | 6p12-p11.1   | x                    |                     |          |        |     | Conflicting Data | Biallelic         |
| <i>ZNF229</i>   | 19q13.31     | x                    |                     |          |        |     | Predicted        | Maternal          |
| <i>SDHD</i>     | 11q23        | x                    | x                   | x        | x      | x   | Conflicting Data | Paternal          |
| <i>SGK2</i>     | 20q13.2      | x                    |                     |          |        | x   | Imprinted        | Paternal          |
| <i>ACD</i>      | 16q22.1      | x                    |                     |          |        |     | Predicted        | Maternal          |
| <i>SLC22A18</i> | 11p15.5      | x                    |                     |          |        | x   | Imprinted        | Maternal          |
| <i>BLCAP</i>    | 20q11.2-q12  | x                    |                     |          | x      | x   | Imprinted        | Isoform Dependent |
| <i>DLGAP2</i>   | 8p23         | x                    | x                   | x        | x      | x   | Imprinted        | Paternal          |
| <i>GRB10</i>    | 7p12-p11.2   | x                    |                     |          |        |     | Imprinted        | Isoform Dependent |
| <i>CALCR</i>    | 7q21.3       | x                    |                     |          | X      | x   | Provisional Data | Maternal          |
| <i>CD81</i>     | 11p15.5      | x                    |                     |          |        |     | Not Imprinted    | Biallelic         |
| <i>DLK1</i>     | 14q32        | x                    |                     |          |        | x   | Imprinted        | Paternal          |
| <i>ZIC1</i>     | 3q24         | x                    |                     |          |        |     | Predicted        | Maternal          |
| <i>HOXA3</i>    | 7p15-p14     |                      | x                   | x        |        |     | Predicted        | Maternal          |
| <i>DCN</i>      | 12q21.33     |                      | x                   |          |        |     | Unknown          | Unknown           |
| <i>ALDH1L1</i>  | 3q21.3       |                      | x                   |          |        |     | Predicted        | Maternal          |
| <i>CTNNA3</i>   | 10q22.2      |                      | x                   |          |        |     | Provisional Data | Maternal          |
| <i>BTNL2</i>    | 6p21.3       |                      | x                   | x        |        |     | Predicted        | Maternal          |
| <i>HSPA6</i>    | 1q23         |                      | x                   | x        | x      | x   | Predicted        | Maternal          |
| <i>AMPD3</i>    | 11p15        |                      | x                   |          |        |     | Not Imprinted    | Biallelic         |
| <i>HOXC4</i>    | 12q13.3      |                      | x                   |          |        |     | Predicted        | Maternal          |
| <i>PPP1R9A</i>  | 7q21.3       |                      | x                   | x        | x      | x   | Imprinted        | Maternal          |
| <i>UBE3A</i>    | 15q11-q13    |                      | x                   | x        |        |     | Imprinted        | Maternal          |
| <i>SLC26A10</i> | 12q13        |                      | x                   |          |        |     | Predicted        | Maternal          |
| <i>LIN28B</i>   | 6q21         |                      | x                   |          |        |     | Imprinted        | Paternal          |
| <i>HOXA4</i>    | 7p15-p14     |                      |                     | x        | x      |     | Predicted        | Maternal          |
| <i>EGFL7</i>    | 9q34.3       |                      |                     | x        |        |     | Predicted        | Paternal          |
| <i>RTL1</i>     | 14q32.31     |                      |                     | x        | x      |     | Imprinted        | Paternal          |
| <i>HOXB3</i>    | 17q21.3      |                      |                     | x        | x      |     | Predicted        | Maternal          |
| <i>GNAS</i>     | 20q13.3      |                      |                     | x        |        |     | Imprinted        | Isoform Dependent |
| <i>GPT</i>      | 8q24.3       |                      |                     | x        |        |     | Predicted        | Maternal          |
| <i>INS</i>      | 11p15.5      |                      |                     | x        |        |     | Imprinted        | Paternal          |
| <i>MEST</i>     | 7q32         |                      |                     | x        | x      |     | Imprinted        | Paternal          |
| <i>MZF1</i>     | 19q13.4      |                      |                     | x        | x      |     | Predicted        | Maternal          |



|                                   |             |           |           |                  |                   |
|-----------------------------------|-------------|-----------|-----------|------------------|-------------------|
| <i>LDB1</i>                       | 10q24-q25   | x         | x         | Predicted        | Maternal          |
| <i>KCNQ1</i>                      | 11p15.5     | x         |           | Imprinted        | Maternal          |
| <i>TCEB3C</i>                     | 18q21.1     | x         |           | Imprinted        | Maternal          |
| <i>PEG3</i>                       | 19q13.4     | x         |           | Imprinted        | Paternal          |
| <i>ZIM2</i>                       | 19q13.4     | x         |           | Imprinted        | Paternal          |
| <i>DDC</i>                        | 7p12.2      | x         |           | Imprinted        | Isoform Dependent |
| <i>NNAT</i>                       | 20q11.2-q12 | x         | x         | Imprinted        | Paternal          |
| <i>SFMBT2</i>                     | 10p14       | x         | x         | Not Imprinted    | Biallelic         |
| <i>MIMT1</i>                      | 19q13.4     | x         | x         | Imprinted        | Paternal          |
| <i>TMEM60</i>                     | 7q11.23     | x         |           | Predicted        | Paternal          |
| <i>C9orf116</i>                   | 9q34.3      | x         |           | Predicted        | Paternal          |
| <i>PURG</i>                       | 8p11        | x         |           | Predicted        | Paternal          |
| <i>IGF2</i>                       | 11p15.5     | x         | x         | Imprinted        | Paternal          |
| <i>MAGI2</i>                      | 7q21        | x         | x         | Imprinted        | Maternal          |
| <i>FOXF1</i>                      | 16q24       | x         |           | Predicted        | Maternal          |
| <i>FERMT2</i>                     | 14q22.1     | x         |           | Predicted        | Paternal          |
| <i>MEG3</i>                       | 14q32       |           | x         | Imprinted        | Maternal          |
| <i>NTM</i>                        | 11q25       |           | x         | Imprinted        | Maternal          |
| <i>TSPAN32</i>                    | 11p15.5     |           | x         | Not Imprinted    | Biallelic         |
| <i>GABRA5</i>                     | 15q11.2-q12 |           | x         | Conflicting Data | Paternal          |
| <i>KBTBD3</i>                     | 11q22.3     |           | x         | Predicted        | Paternal          |
| <i>FOXG1</i>                      | 14q13       |           | x         | Predicted        | Paternal          |
| <i>SLC4A2</i>                     | 7q35-q36    |           | x         | Predicted        | Maternal          |
| <i>GATA3</i>                      | 10p15       |           | x         | Predicted        | Paternal          |
| <i>HIST3H2BB</i>                  | 1q42.13     |           | x         | Predicted        | Maternal          |
| <b><i>N</i> (imprinted genes)</b> | <b>22</b>   | <b>16</b> | <b>37</b> | <b>37</b>        |                   |

**Supplementary Table 17.** Differentially methylated genes were mapped against a catalogue of known imprinted loci (<http://www.geneimprint.org/>). POI=parent of origin effect

**Supplementary Table 18. Differential methylation of genes encoding regulators of epigenetic mechanisms**

| Gene<br>ID         | SAT vs. OVAT |          | non-obese vs. obese |           | Function                                                                                          |
|--------------------|--------------|----------|---------------------|-----------|---------------------------------------------------------------------------------------------------|
|                    | in non-obese | in obese | in SAT              | in OVAT   |                                                                                                   |
| <i>ALKBH8</i>      | x            |          |                     |           | alkB, alkylation repair homolog 8 (E. coli)                                                       |
| <i>KDM5A</i>       | x            |          |                     | x         | lysine (K)-specific demethylase 5A                                                                |
| <i>SUV39H1</i>     | x            |          |                     |           | suppressor of variegation 3-9 homolog 1 (Drosophila)                                              |
| <i>BHMT</i>        | x            |          |                     | x         | betaine-homocysteine methyltransferase                                                            |
| <i>SETMAR</i>      | x            |          | x                   | x         | SET domain and mariner transposase fusion gene                                                    |
| <i>HIST1H2APS1</i> |              | x        | x                   | x         | histone cluster 1, H2a, pseudogene 1                                                              |
| <i>MBD1</i>        |              | x        | x                   |           | methyl-CpG binding domain protein 1                                                               |
| <i>PNMT</i>        |              | x        |                     |           | phenylethanolamine N-methyltransferase                                                            |
| <i>KDM5D</i>       |              | x        |                     |           | lysine (K)-specific demethylase 5D                                                                |
| <i>KDM5B</i>       |              | x        |                     |           | similar to Jumonji, AT rich interactive domain 1B (RBP2-like); lysine (K)-specific demethylase 5B |
| <i>HDAC7</i>       |              | x        | x                   |           | histone deacetylase 7                                                                             |
| <i>HIST1H2BA</i>   |              | x        | x                   | x         | histone cluster 1, H2ba                                                                           |
| <i>PHF8</i>        |              | x        | x                   | x         | PHD finger protein 8                                                                              |
| <i>HNMT</i>        |              |          | x                   | x         | histamine N-methyltransferase                                                                     |
| <i>HIST1H3E</i>    |              |          | x                   |           | histone cluster 1, H3e                                                                            |
| <i>HIST1H2AA</i>   |              |          | x                   | x         | histone cluster 1, H2aa                                                                           |
| <i>KDM3A</i>       |              |          | x                   | x         | lysine (K)-specific demethylase 3A                                                                |
| <i>HDAC2</i>       |              |          | x                   |           | histone deacetylase 2                                                                             |
| <i>ALKBH6</i>      |              |          | x                   | x         | alkB, alkylation repair homolog 6 (E. coli)                                                       |
| <i>HDAC4</i>       |              |          | x                   |           | histone deacetylase 4                                                                             |
| <i>MTHFS</i>       |              |          | x                   | x         | 5,10-methenyltetrahydrofolate synthetase (5-formyltetrahydrofolate cyclo-ligase)                  |
| <i>MECP2</i>       |              |          |                     | x         | methyl CpG binding protein 2 (Rett syndrome)                                                      |
| <i>COMT</i>        |              |          |                     | x         | catechol-O-methyltransferase                                                                      |
| <i>JARID2</i>      |              |          |                     | x         | jumonji, AT rich interactive domain 2                                                             |
| <b>N:</b>          | <b>5</b>     | <b>8</b> | <b>14</b>           | <b>14</b> |                                                                                                   |

**Supplementary Table 18.** Summary of genes encoding regulators of epigenetic mechanisms, which are differentially methylated. Gene function was analyzed using DAVID (Huang et al., 2009).

## References

Huang, D.W., Sherman, B.T., and Lempicki, R.A. (2009). Systematic and integrative analysis of large gene lists using DAVID bioinformatics resources. *Nature protocols* 4, 44-57.

Locke, A.E., Kahali, B., Berndt, S.I., Justice, A.E., Pers, T.H., Day, F.R., Powell, C., Vedantam, S., Buchkovich, M.L., and Yang, J., et al. (2015). Genetic studies of body mass index yield new insights for obesity biology. *Nature* 518, 197-206.

Shungin, D., Winkler, T.W., Croteau-Chonka, D.C., Ferreira, T., Locke, A.E., Mägi, R., Strawbridge, R.J., Pers, T.H., Fischer, K., and Justice, A.E., et al. (2015). New genetic loci link adipose and insulin biology to body fat distribution. *Nature* 518, 187-196.

Welter, D., MacArthur, J., Morales, J., Burdett, T., Hall, P., Junkins, H., Klemm, A., Flicek, P., Manolio, T., and Hindorff, L., et al. (2014). The NHGRI GWAS Catalog, a curated resource of SNP-trait associations. *Nucleic acids research* 42, D1001-6.
